# Supplementary material for: Mutational phospho-mimicry reveals a regulatory role for the XRCC4 and XLF C-terminal tails in modulating DNA bridging during classical non-homologous end joining
Source: eLife journal article supplement (doi:10.7554/elife.22900), 2017-05-13

FIGURE 1

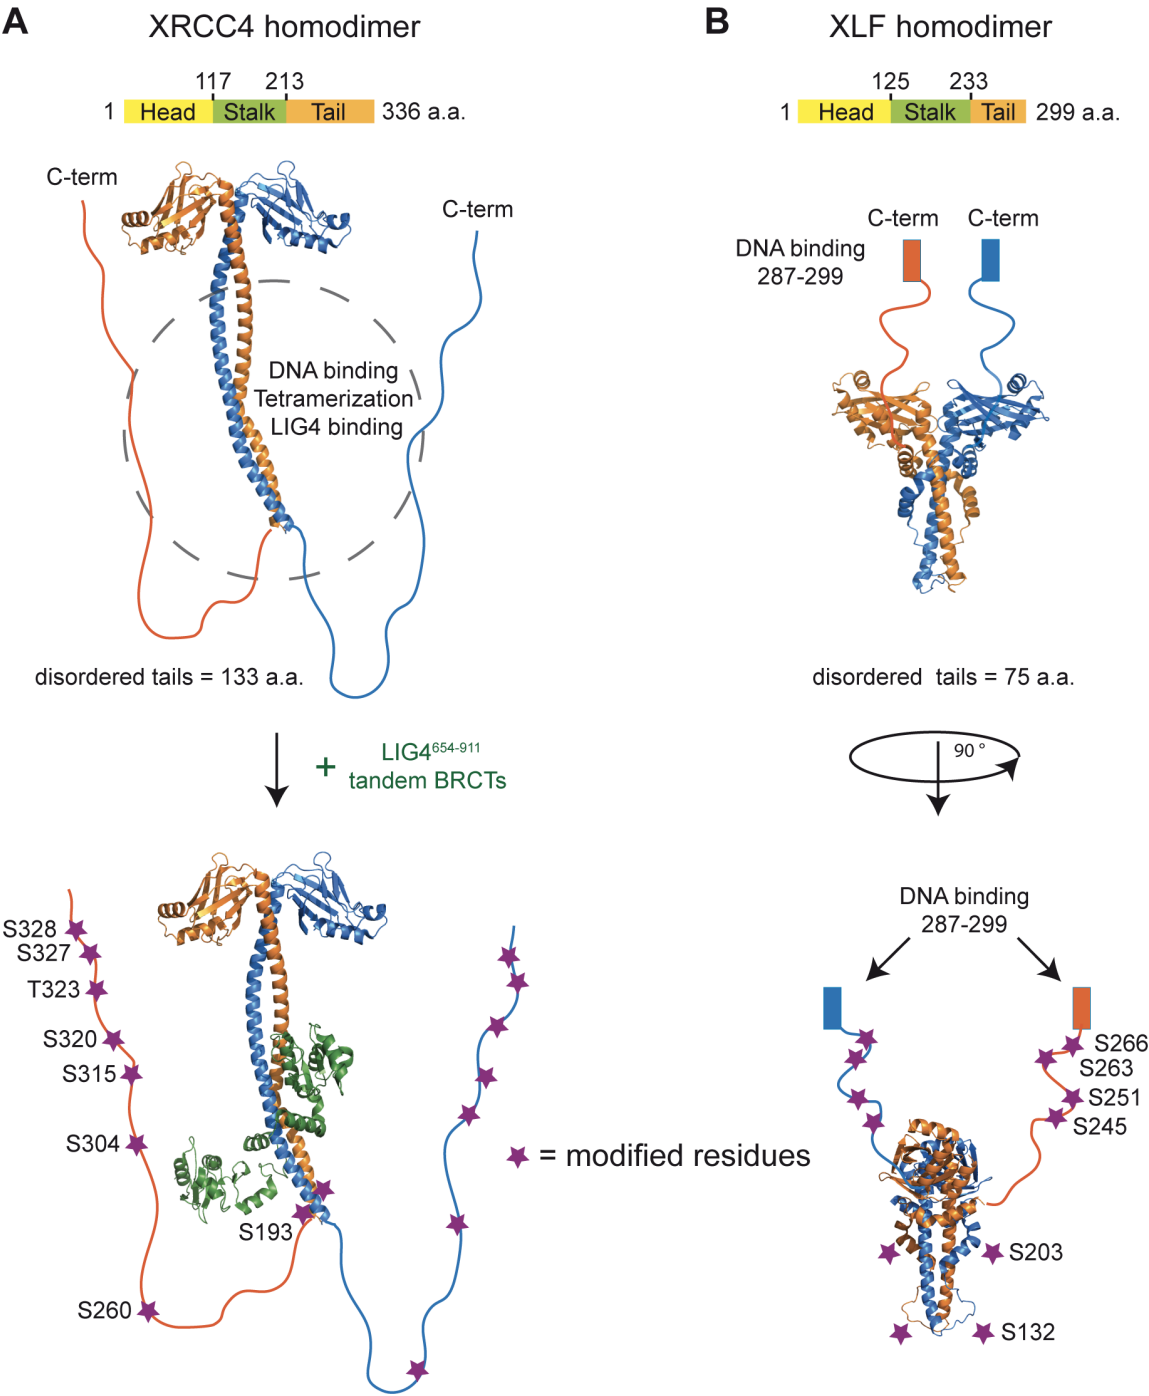

FIGURE 1 – SUPPLEMENT 1

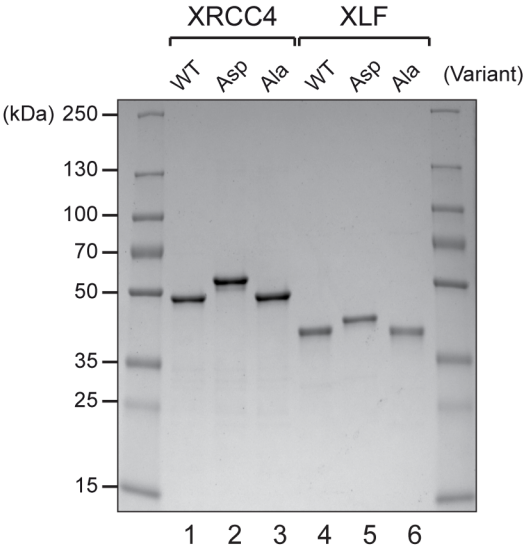

FIGURE 2

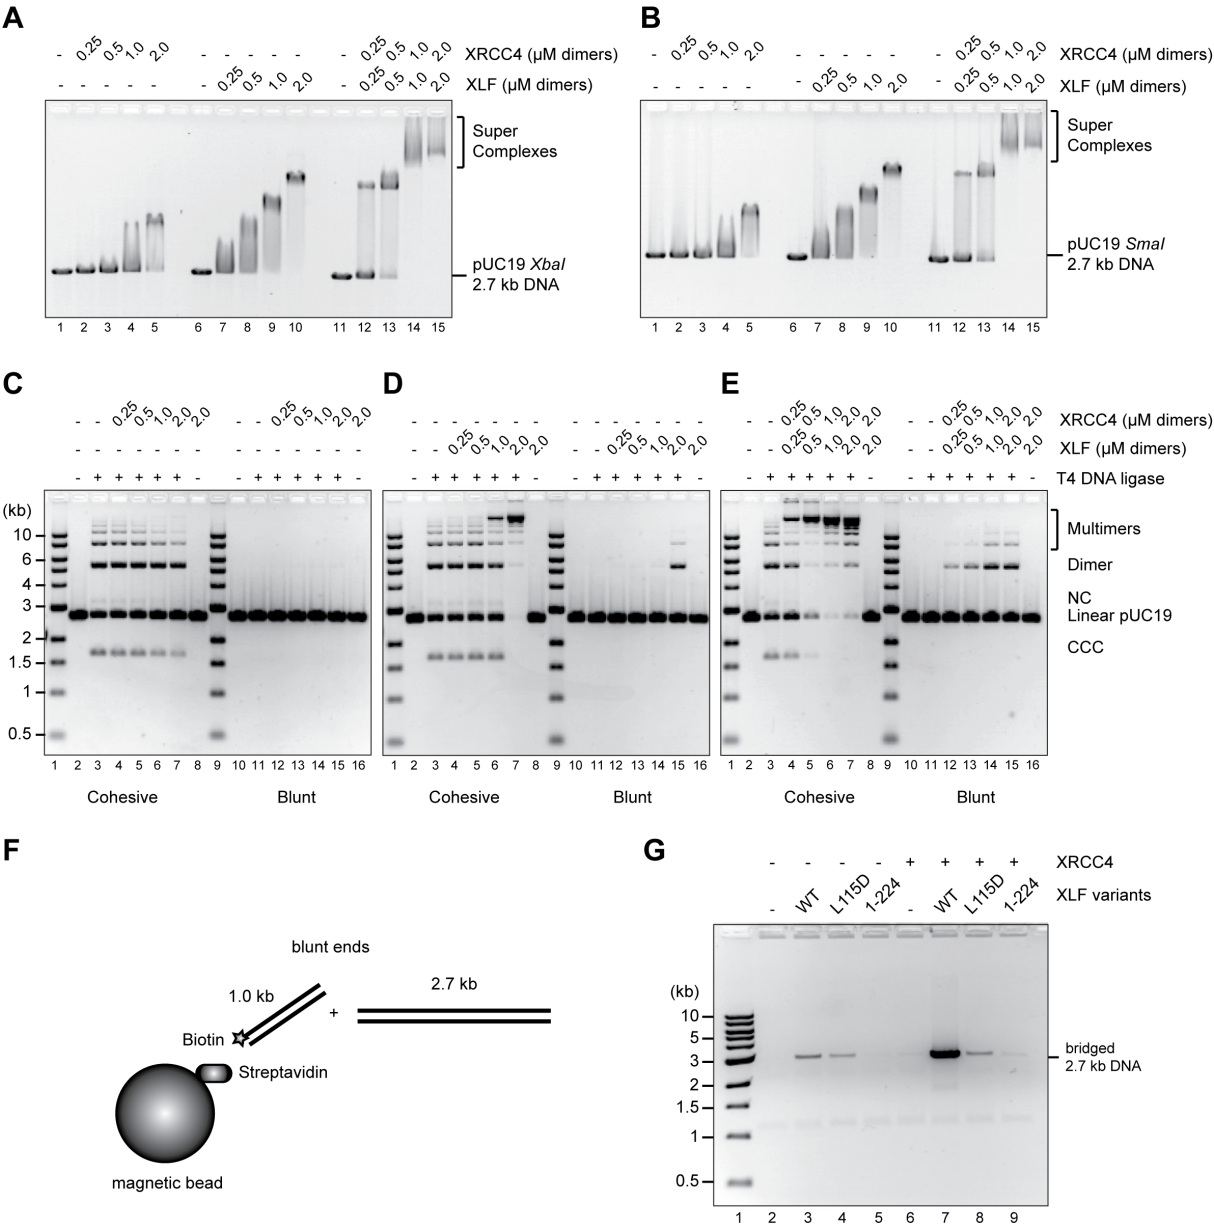

FIGURE 2 – SUPPLEMENT 1

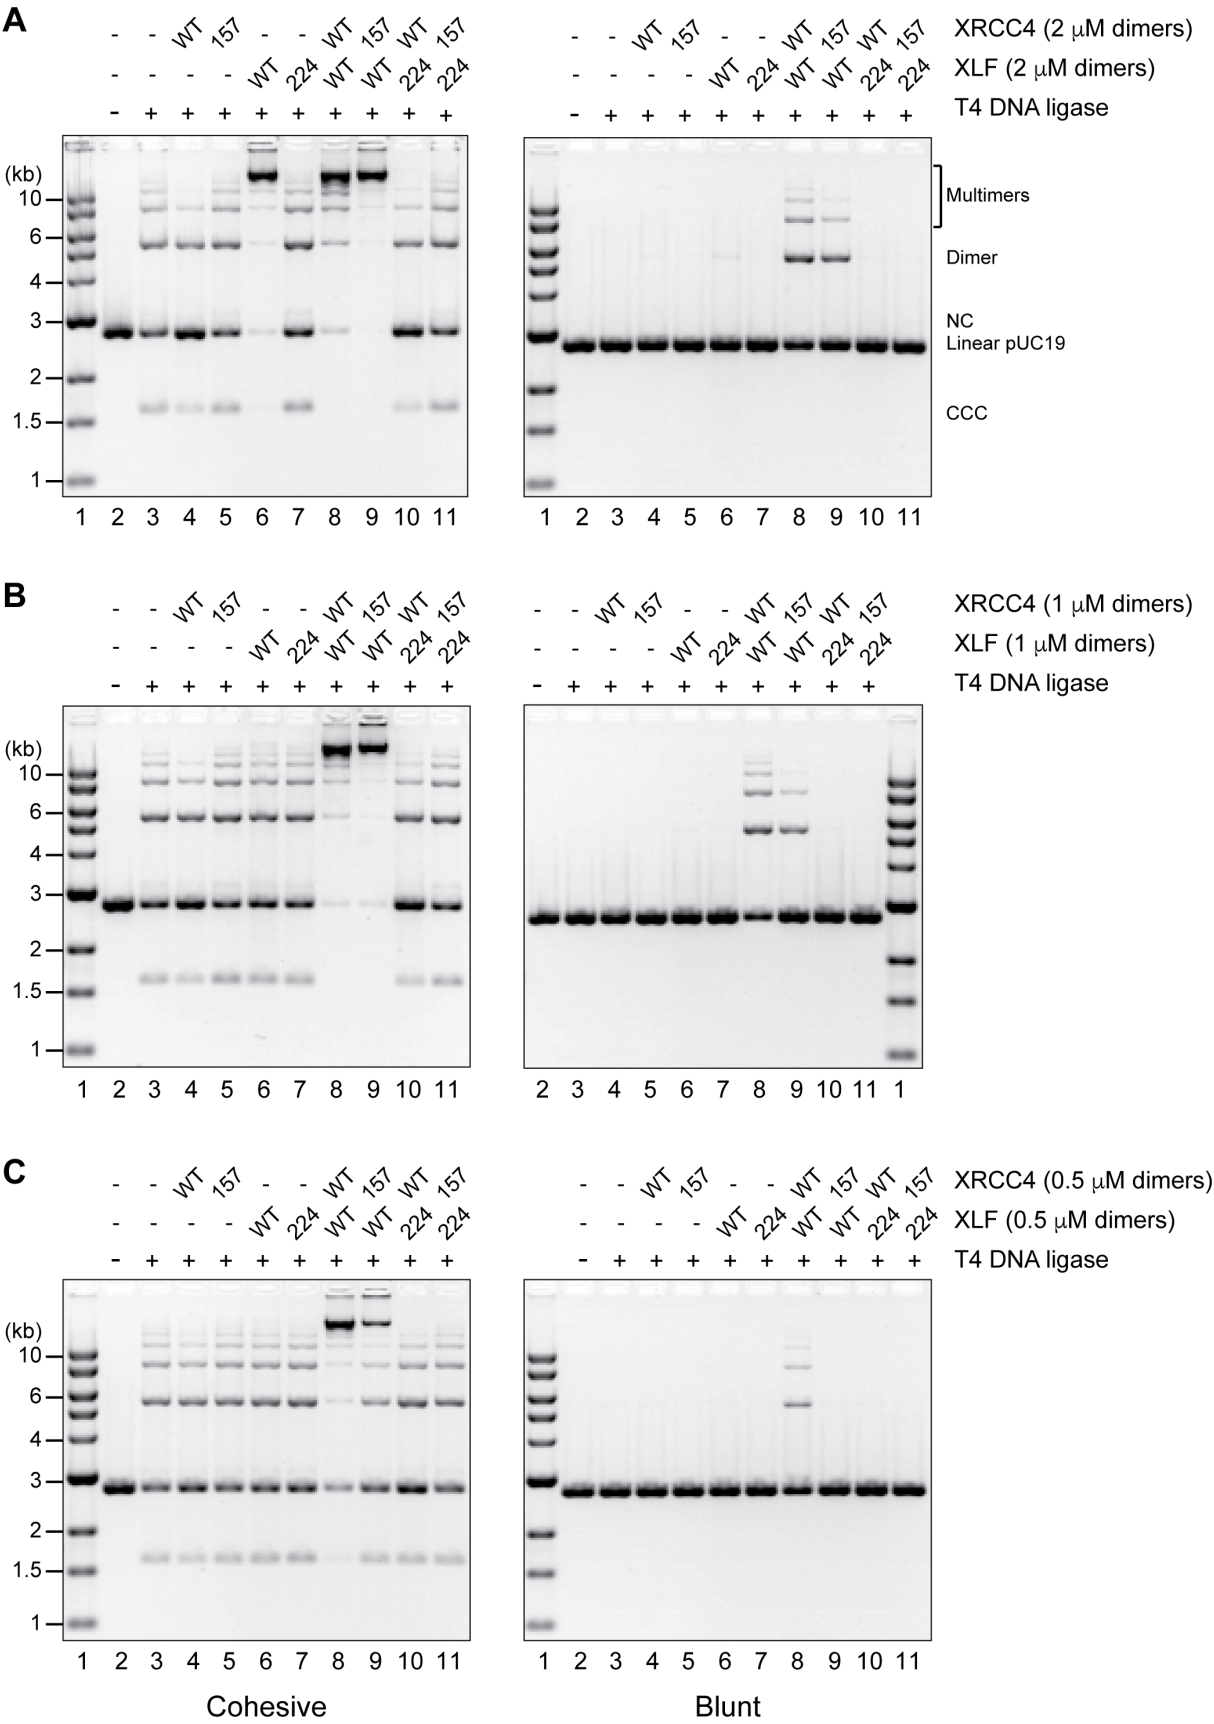



FIGURE 3

**A**

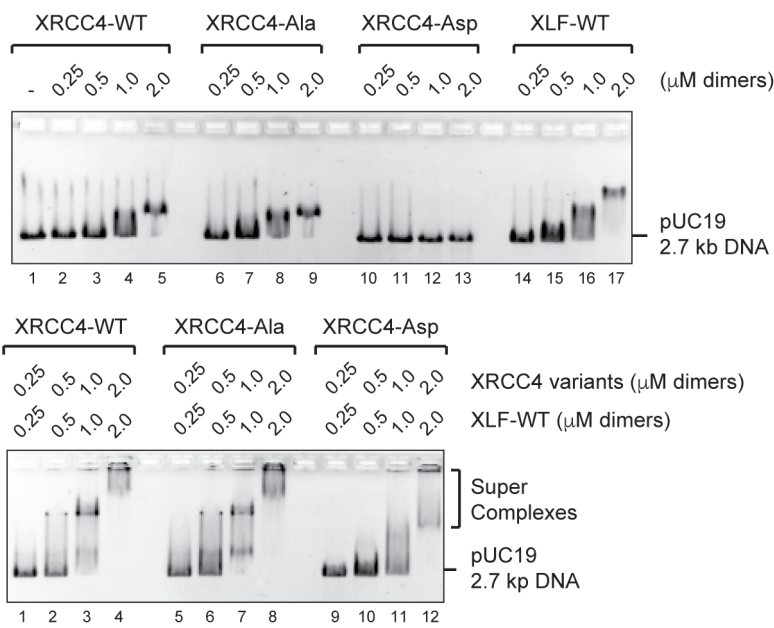

**B**

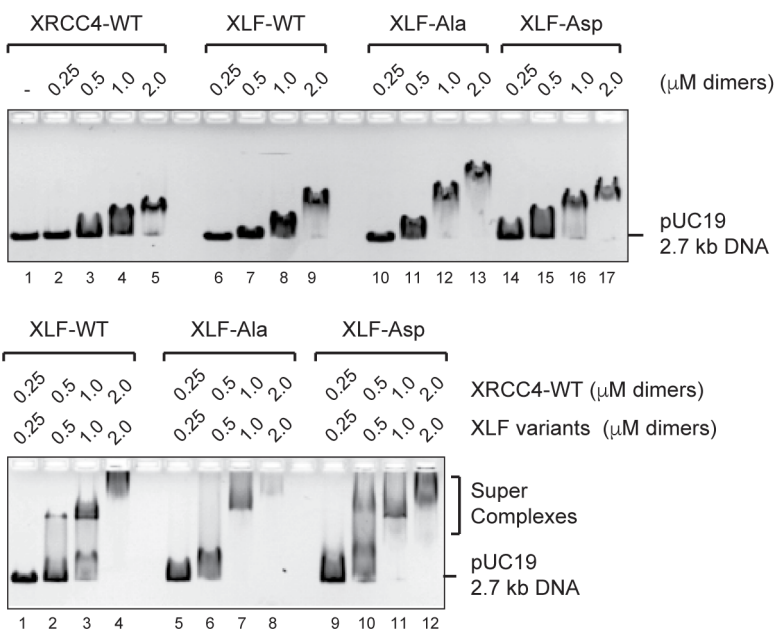

**A**

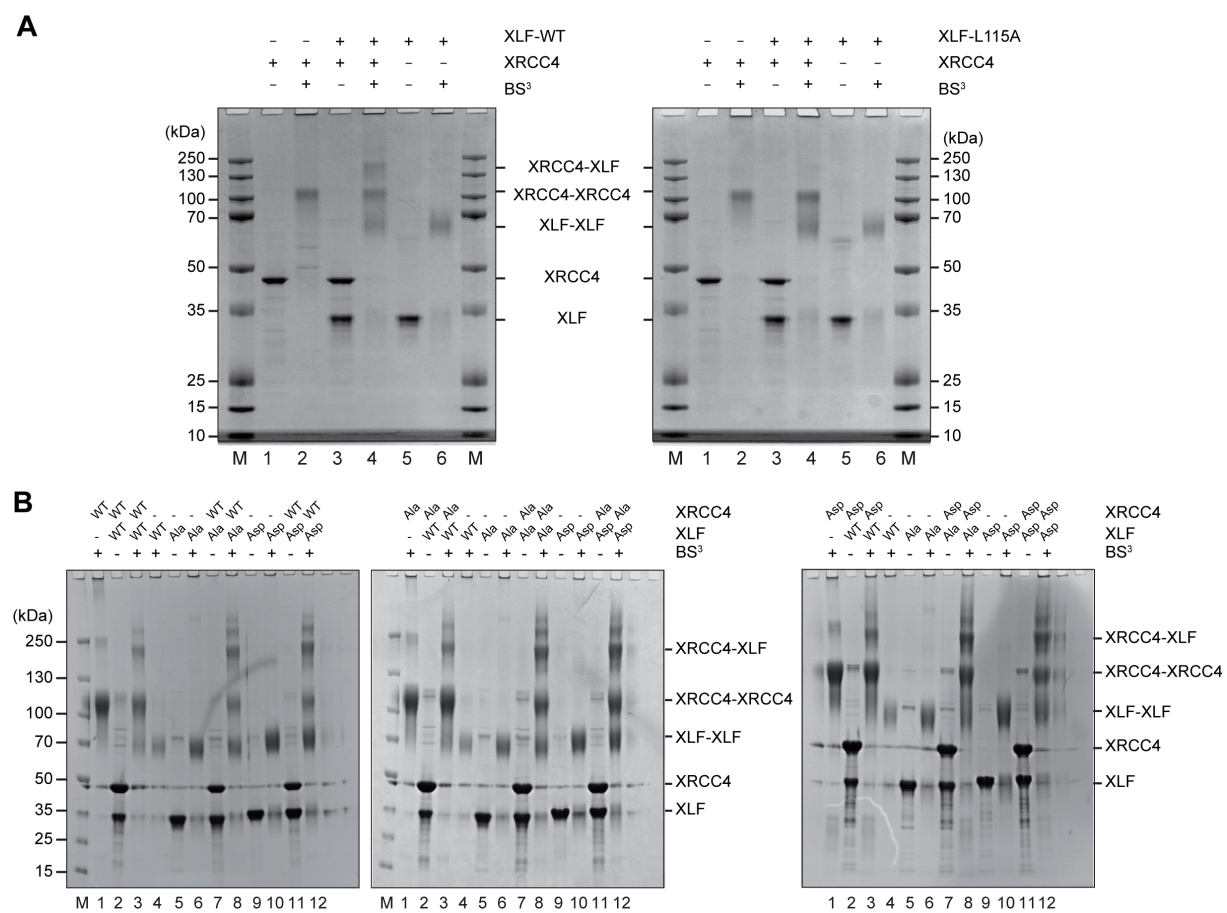

FIGURE 5

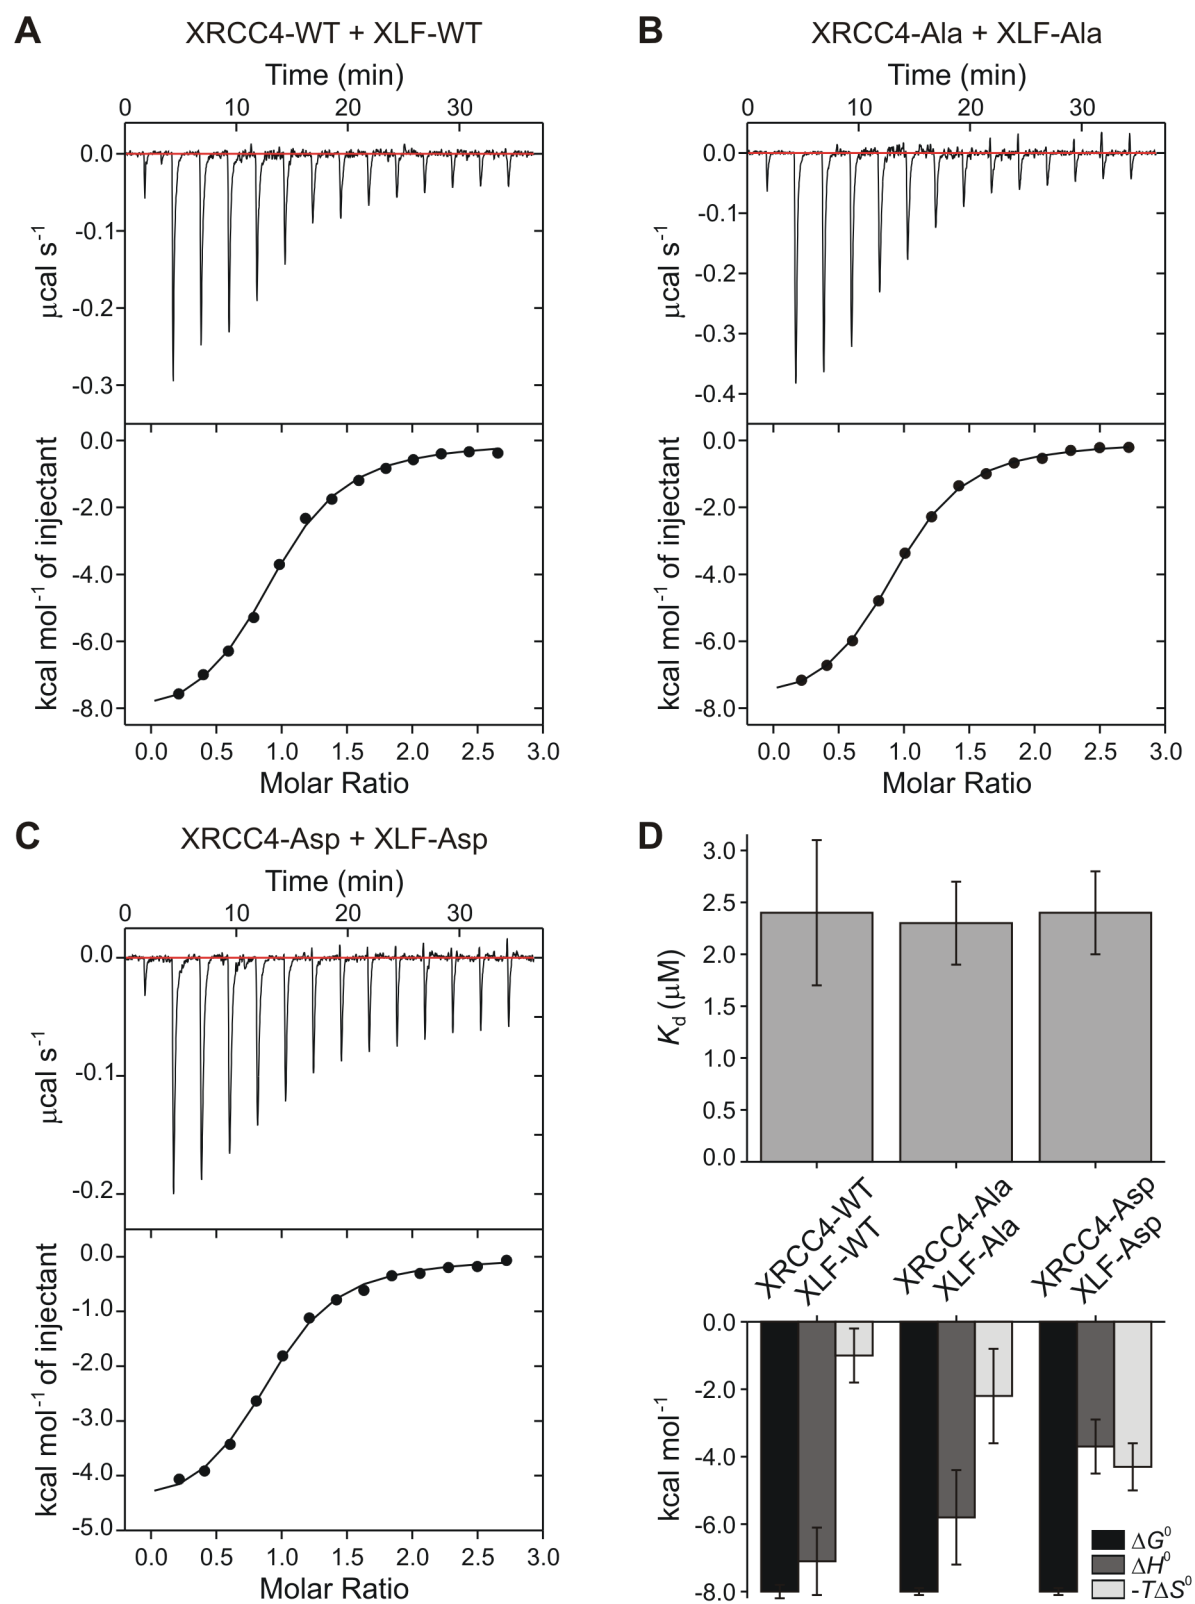

FIGURE 5 – SUPPLEMENT 1

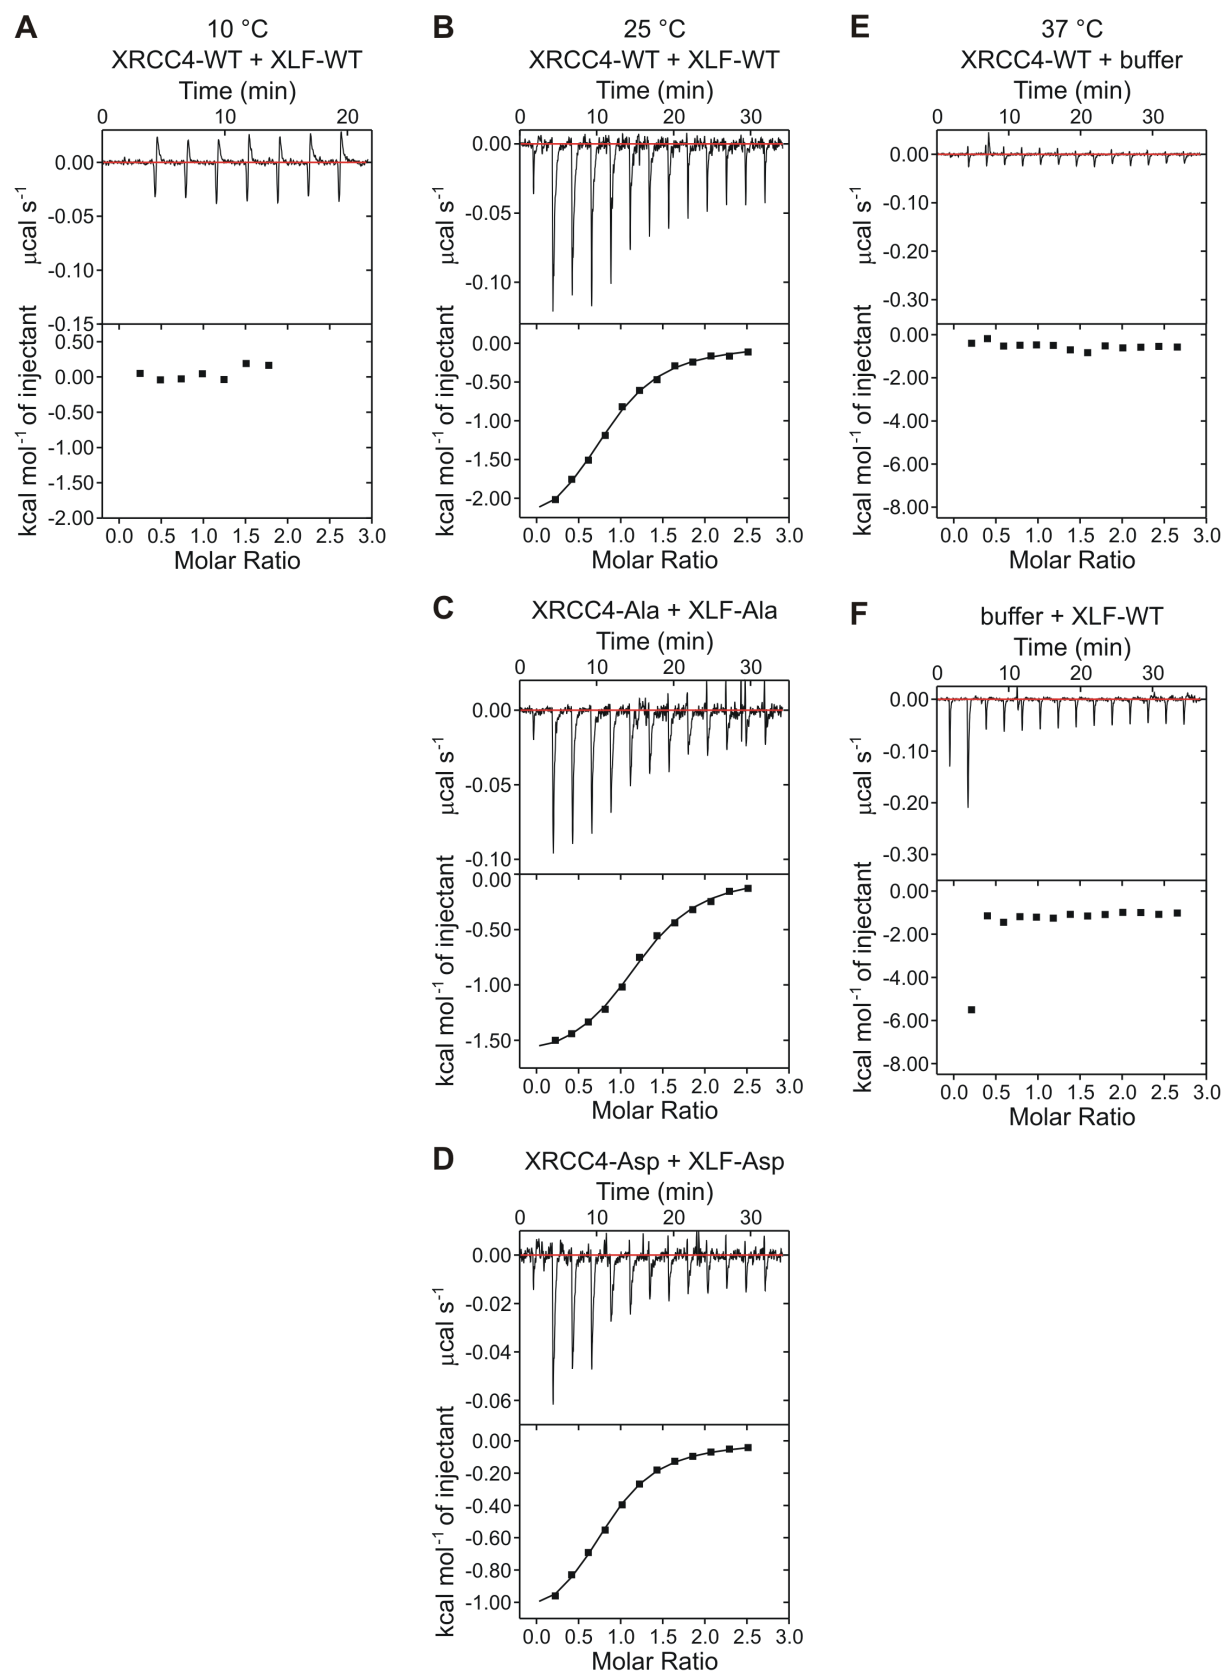

FIGURE 6

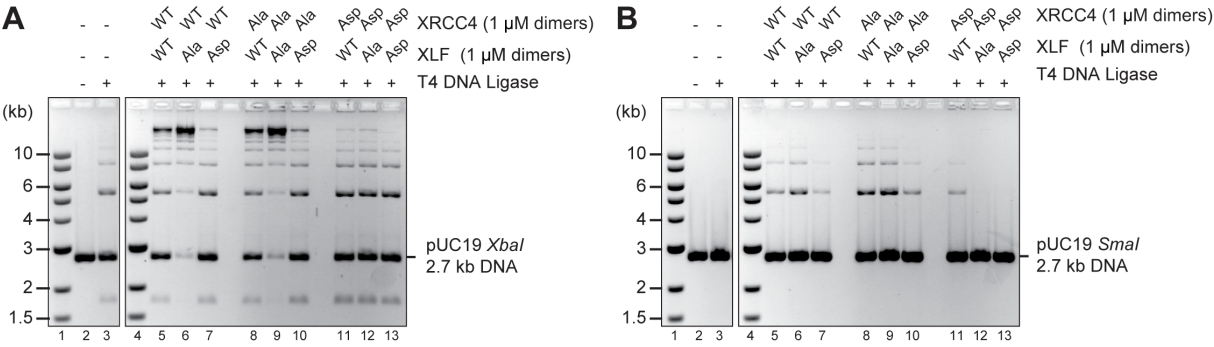

FIGURE 7

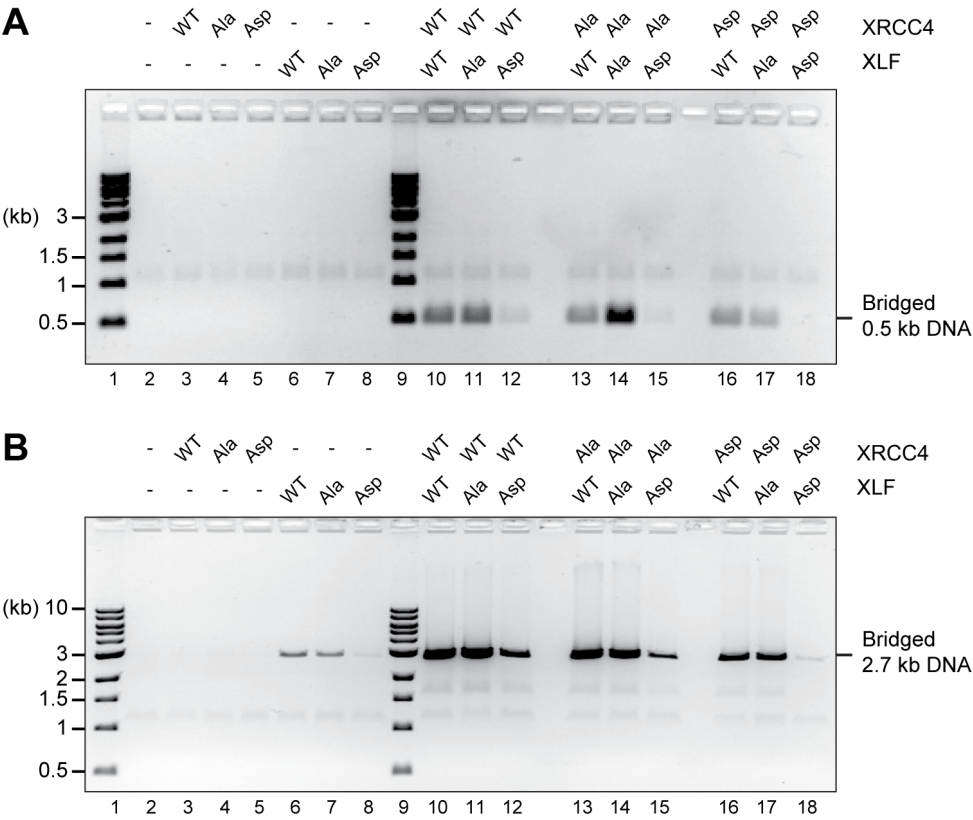

FIGURE 8

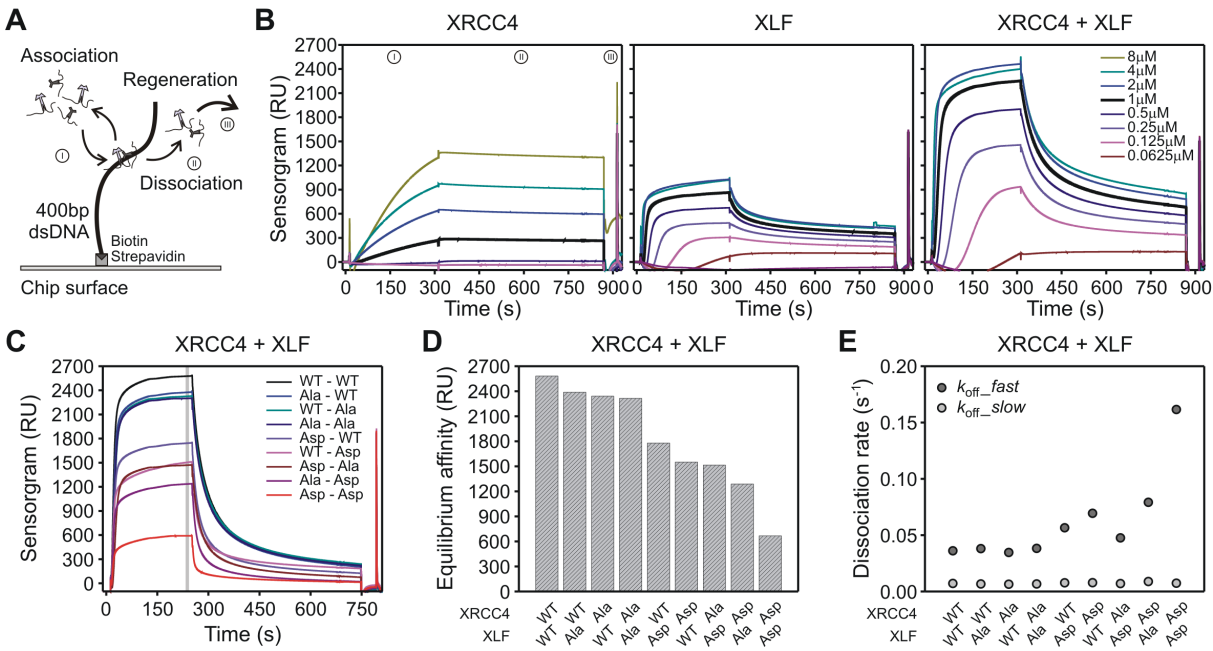

FIGURE 8 – SUPPLEMENT 1

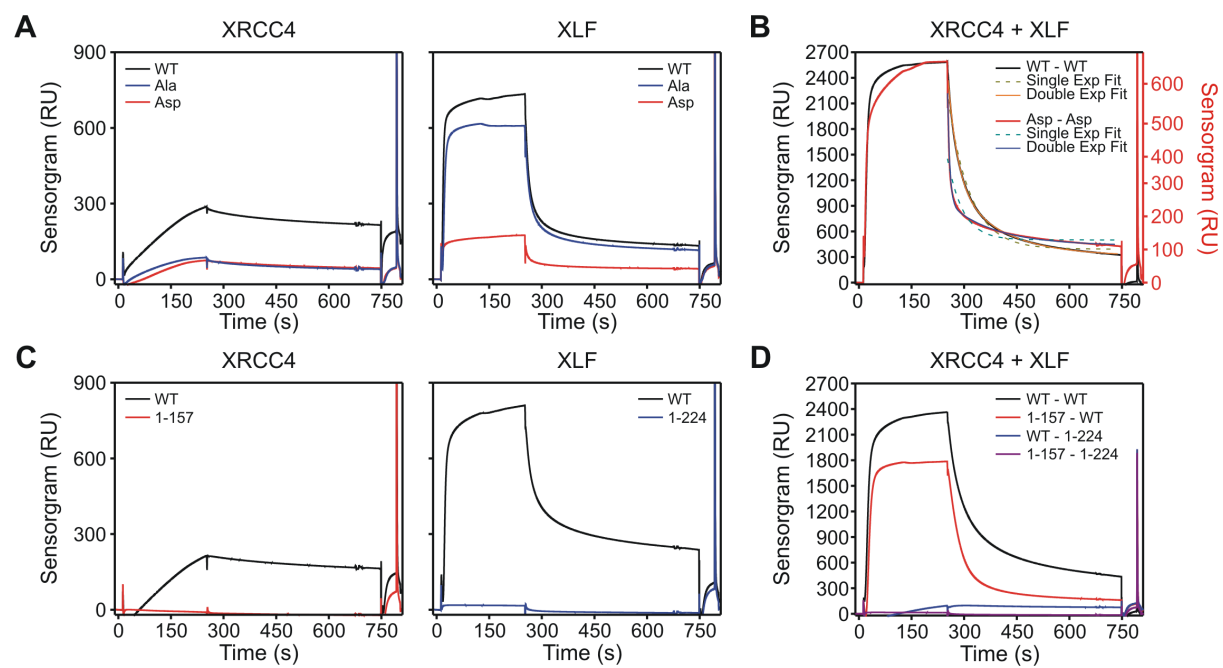



FIGURE 9

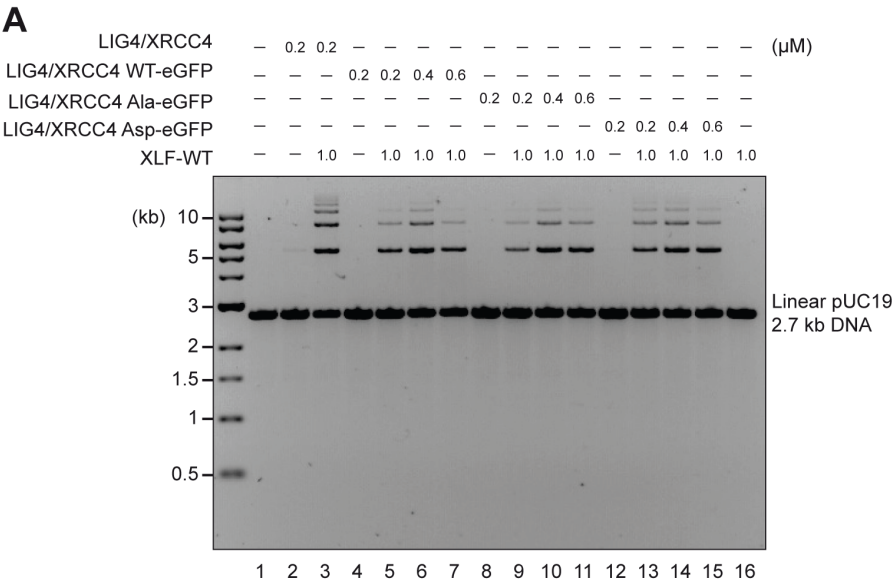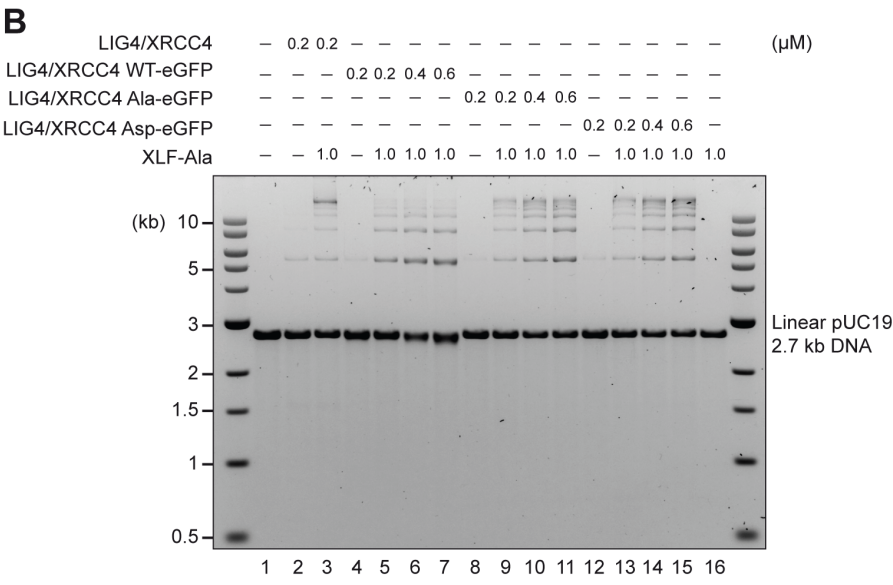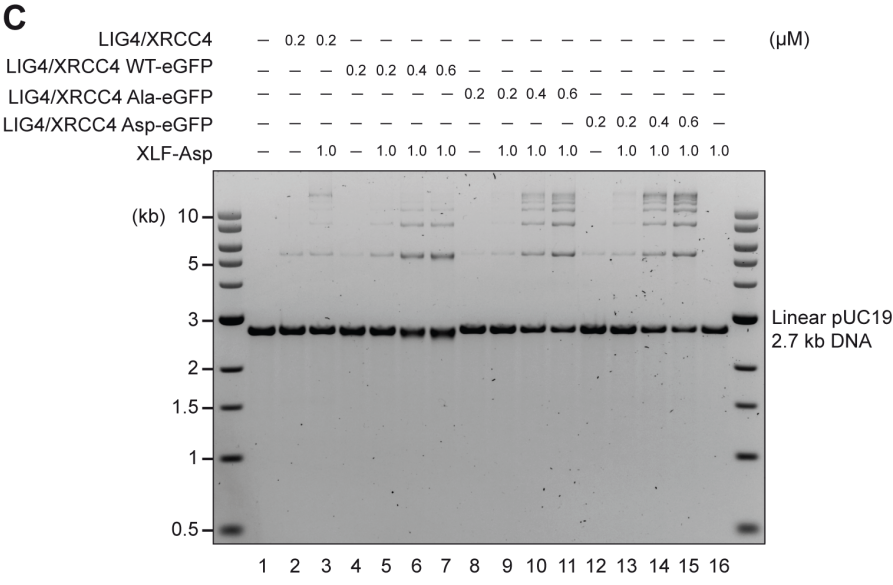

FIGURE 9 – SUPPLEMENT 1

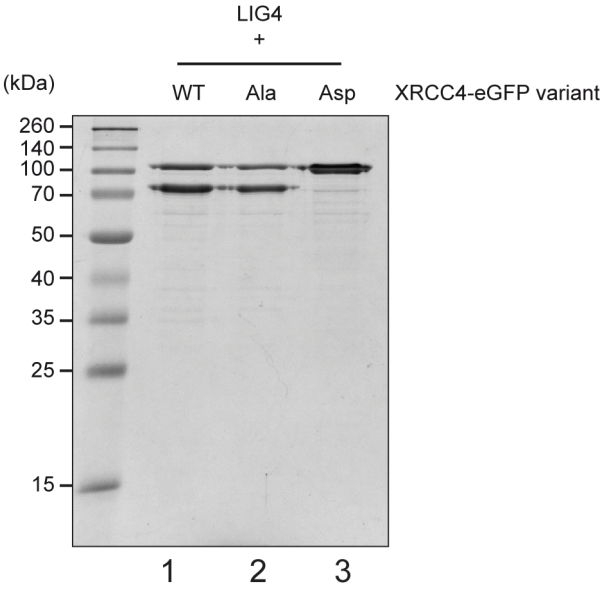

FIGURE 10

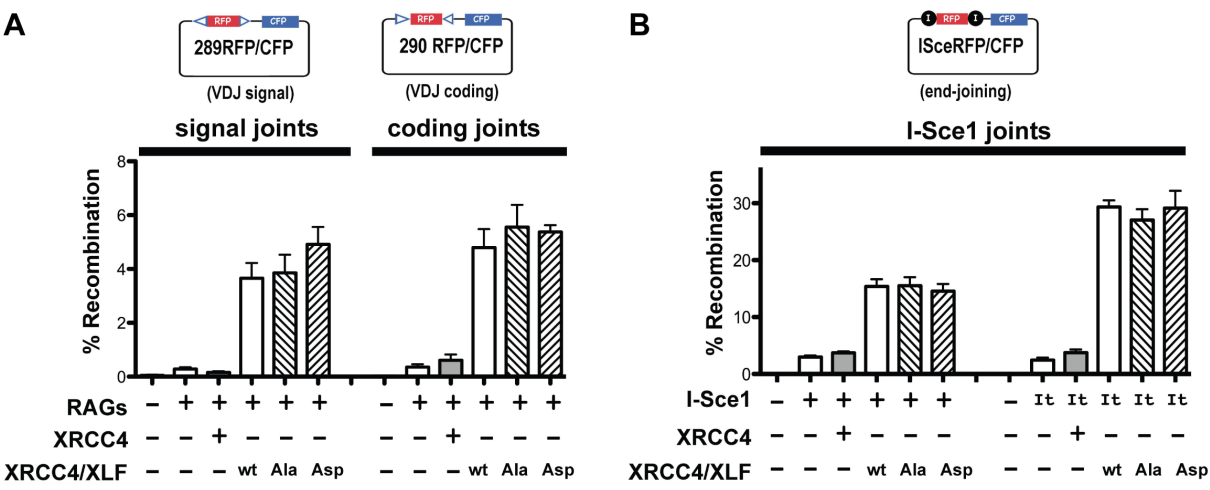

FIGURE 11

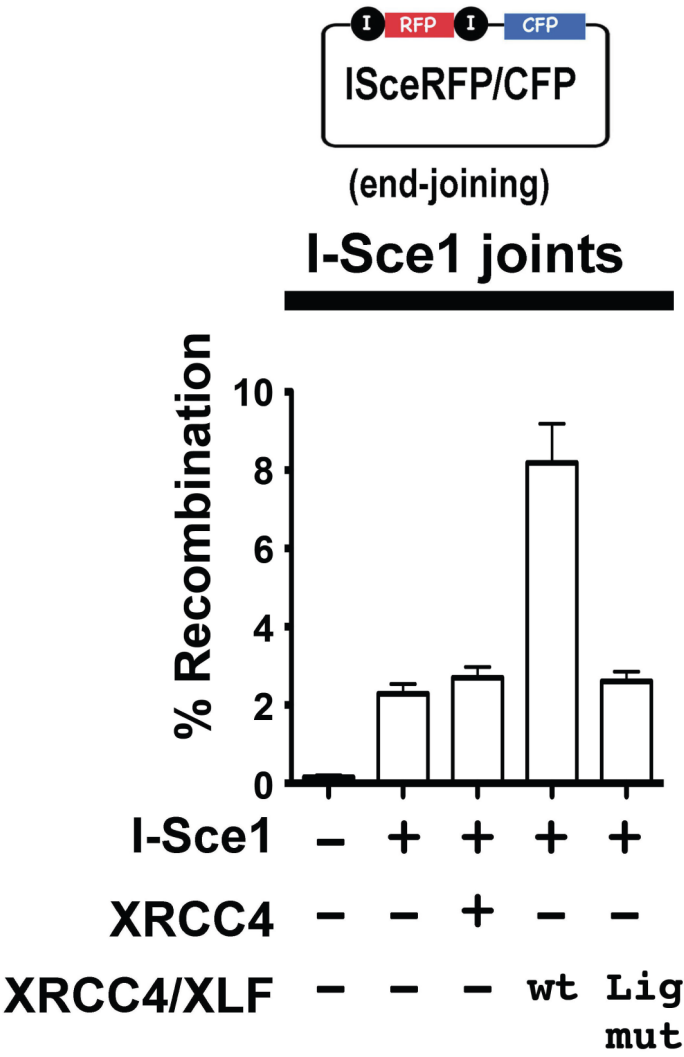

FIGURE 12

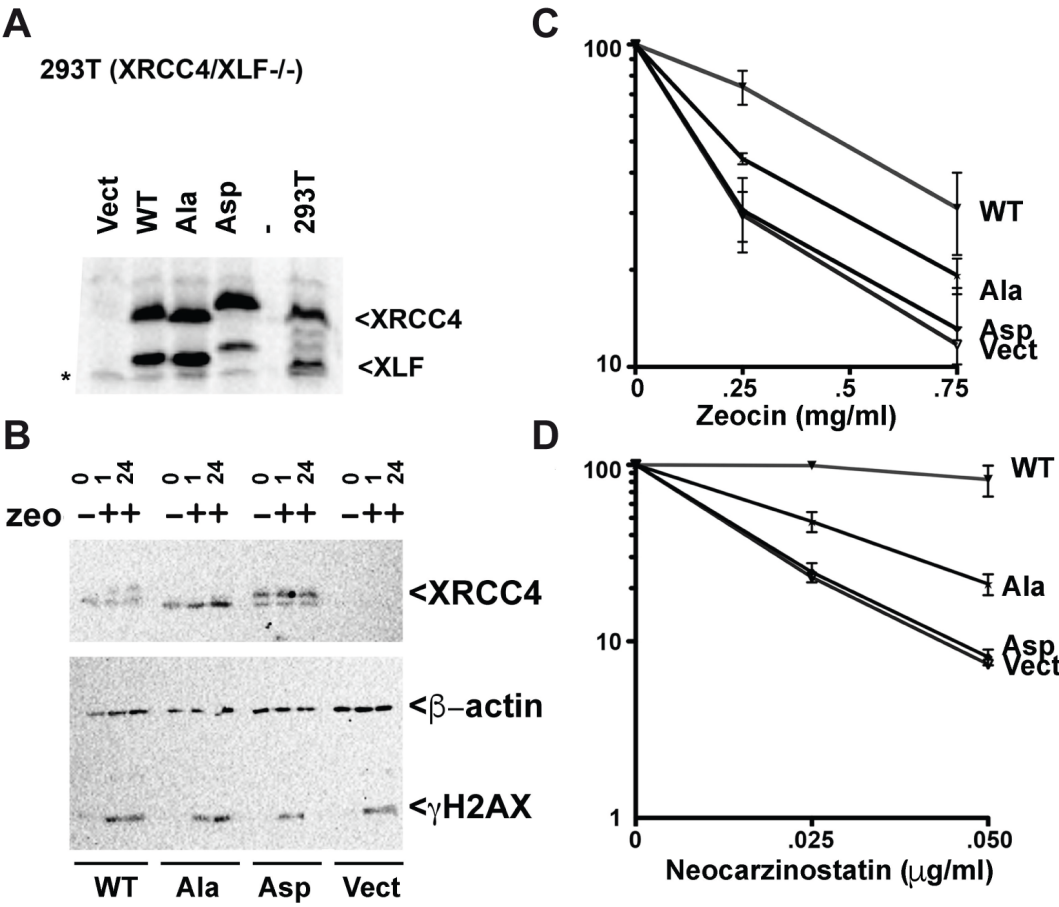

FIGURE 12 – SUPPLEMENT 1

HCT116

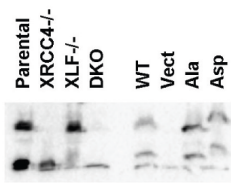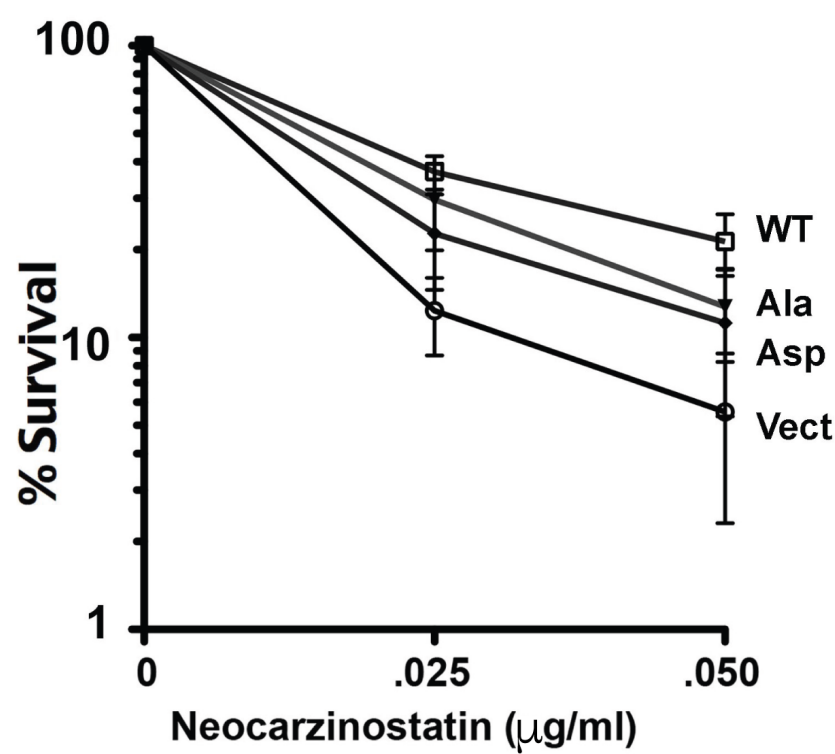

FIGURE 12 – SUPPLEMENT 2

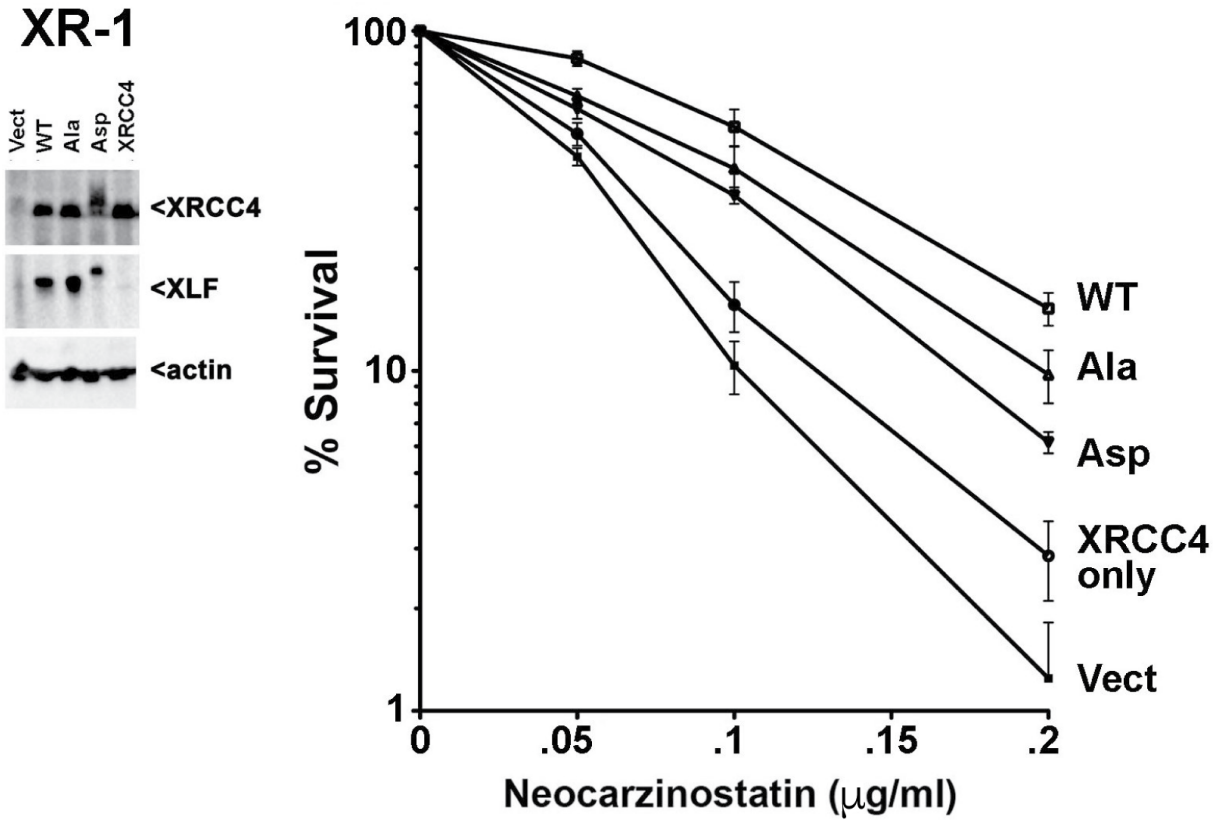

FIGURE 13

**A**

**Chromosome 9**

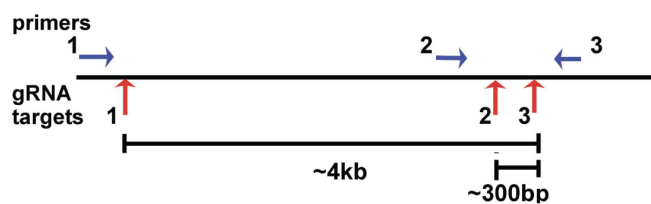

**B**

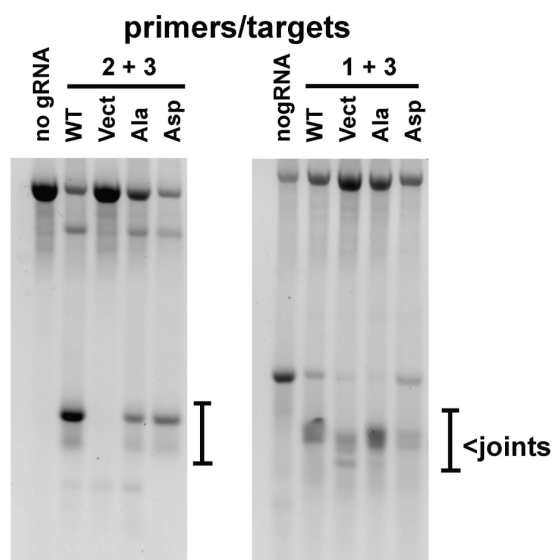

**C**

|           | #<br>sequences | Nucleotide<br>loss | % SSH | SSH<br>length |
|-----------|----------------|--------------------|-------|---------------|
| Wild type | 51             | 3.8<br>(0-31)      | 43/51 | 1.3           |
| Vector    | 33             | 55.5<br>(0-121)    | 11/33 | 3.5           |
| Ala       | 50             | 5.8<br>(0-36)      | 36/50 | 1.8           |
| Asp       | 44             | 14.4<br>(1-79)     | 34/44 | 2.5           |

**D**

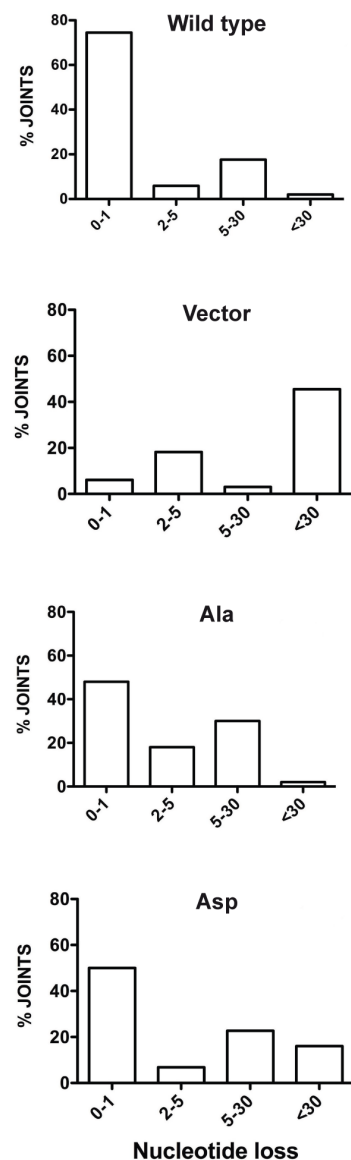

Supplement: supp [file elife-22900-supp-v1.zip]
