# Supplementary material for: Mutational phospho-mimicry reveals a regulatory role for the XRCC4 and XLF C-terminal tails in modulating DNA bridging during classical non-homologous end joining
Source: eLife journal article supplement (doi:10.7554/elife.22900), 2017-05-13
Supplement: supp [file elife-22900-supp-v1.zip]

Archive with 19 entries (19 files):
- elife_poa_e22900_Figure_8_source_data_3.txt.txt
- elife_poa_e22900_Figure_9_figure_supplement_1.tif
- elife_poa_e22900_Figure_8_Supplement_1.tif
- elife_poa_e22900_Table_1_in_pdf_format_for_reviewers.pdf
- elife_poa_e22900_Figure_8_source_data_5.txt.txt
- elife_poa_e22900_Figure_8_source_data_1.txt.txt
- elife_poa_e22900_Figure_8_figure_supplement_1_source_data_1.txt.txt
- elife_poa_e22900_Figure_8_figure_supplement_1_source_data_2.txt.txt
- elife_poa_e22900_Figure_1_figure_supplement_1.tif
- elife_poa_e22900_Figure_8_source_data_2.txt.txt
- elife_poa_e22900_All_figures_in_pdf_format.pdf
- elife_poa_e22900_Figure_5_figure_supplement_1_source_data_1.txt.txt
- elife_poa_e22900_Figure_5_Supplement_1.tif
- elife_poa_e22900_Figure12_figure_supplement_1.tif
- elife_poa_e22900_Table_1_source_data_1.txt.txt
- elife_poa_e22900_Figure_12_figure_supplement_2.tif
- elife_poa_e22900_Figure_2_figure_supplement_1.tif
- elife_poa_e22900_Figure_8_source_data_4.txt.txt
- elife_poa_e22900_Figure_8_figure_supplement_1_source_data_3.txt.txt
