# Supplementary material for: Mutational phospho-mimicry reveals a regulatory role for the XRCC4 and XLF C-terminal tails in modulating DNA bridging during classical non-homologous end joining
Source: eLife journal article supplement (doi:10.7554/elife.22900), 2017-05-13
Supplement: supp [file elife-22900-supp-v1.zip › elife_poa_e22900_Figure_5_figure_supplement_1_source_data_1.txt.txt]

Time	A	Time	B
s	ucal/sec	s	ucal/sec
5	2.78080626604726E-4	5	-9.69256172374422E-4
6	1.44758353375352E-5	6	-0.00156838821510341
7	3.1087104407046E-4	7	-0.00142752025783199
8	8.77266252803821E-4	8	-5.26652300561814E-4
9	0.00171366146153673	9	8.64215656709355E-4
10	0.00179005667026999	10	8.95083613980496E-4
11	0.00100645187900383	11	6.95951571251463E-4
12	7.02832744359227E-4	12	4.56848067455162E-4
13	5.09197059662903E-4	13	-3.42222506803935E-4
14	-3.54438625033815E-4	14	-1.2930810626699E-6
15	-1.78074309729048E-4	15	-6.00363655320457E-4
16	0.00135829000557486	16	-8.19434229579308E-4
17	0.00177465432087764	17	-5.9850480383794E-4
18	8.6101863618282E-4	18	-7.27575378096645E-4
19	2.2727307649717E-4	19	-0.00145652436618704
20	3.13519064889967E-4	20	-4.85464001495295E-4
21	-6.02349467175856E-5	21	-1.94403636803564E-4
22	-4.33988958325138E-4	22	-3.33432721104643E-5
23	-2.17742969931045E-4	23	5.37717092581325E-4
24	2.9850301846146E-4	24	9.58777457272575E-4
25	-2.65345475044754E-4	25	5.69937519442121E-4
26	-2.69339986031625E-4	26	-1.5874834047036E-4
27	-5.23334497018801E-4	27	-4.07434200382362E-4
28	-3.97329008004377E-4	28	-3.46120060294552E-4
29	-2.91323518990971E-4	29	-7.14805920206452E-4
30	5.46819700222301E-5	30	-4.13491780118846E-4
31	-3.79312540964349E-4	31	3.67822359969239E-4
32	1.36388084346351E-4	32	8.99461931893164E-4
33	2.02037899040164E-4	33	7.21155742456681E-4
34	7.27687713734326E-4	34	8.62849553020517E-4
35	-2.66662471571699E-4	35	9.2454336358383E-4
36	-4.81012656877944E-4	36	0.00186623717414758
37	-0.00105536284218477	37	0.00137793098471128
38	-6.19860930338056E-4	38	7.09770476962746E-4
39	-5.24671257831955E-4	39	5.21917519444415E-4
40	7.20518414673244E-4	40	1.34064561925662E-4
41	5.25708087178778E-4	41	-1.73788395592567E-4
42	0.00111089775968409	42	6.68358646889189E-4
43	0.00145608743218961	43	0.0012405056893714
44	0.00121127710469437	44	0.0011326527318527
45	7.86019832100138E-4	45	0.00117512366210182
46	0.00102064066538698	46	8.47682925378734E-4
47	0.00127526149867396	47	0.00135024218865532
48	2.09882331962064E-4	48	9.92801451932479E-4
49	2.54503165248998E-4	49	0.00106536071520846
50	9.49123998536194E-4	50	0.00119791997848573
51	0.00181356030280977	51	0.00102054022282072
52	9.87443020039613E-4	52	2.23343410331367E-4
53	0.0020213257372701	53	1.6614659784242E-4
54	0.00106520845450042	54	8.08949785354507E-4
55	9.0911717309794E-6	55	0.00103175297286562
56	-0.00102702611103922	56	9.84556160376293E-4
57	-9.03143393808037E-4	57	6.47359347888177E-4
58	-0.00148995199788171	58	-1.89867069471106E-4
59	-0.00103703713047487	59	-0.00130710532877654
60	-5.44122263069546E-4	60	-0.00190434358808211
61	1.08792604335939E-4	61	-0.00192158184738833
62	0.00108170747174263	62	-0.0014788201066942
63	6.34622339148017E-4	63	-6.26058365999604E-4
64	7.97324484969941E-4	64	-5.03351566525367E-4
65	1.19048111502984E-4	65	1.99102503339432E-4
66	-0.00128922826196476	66	3.51556573204626E-4
67	-0.00230750463543128	67	-4.15989356931767E-4
68	-0.00167578100889809	68	-6.33535287065889E-4
69	-0.00181405738236506	69	-0.00139108121720177
70	-0.00160233375583108	70	-0.00266862714733751
71	-5.81497497122108E-4	71	-0.00350646508076213
72	-6.41154220537565E-4	72	-0.00287446523823576
73	-0.00146081094395178	73	-0.00212246539570948
74	-0.00156046766736662	74	-2.80465553184506E-4
75	-0.00150012439078129	75	4.15342893411719E-5
76	-0.00177978111419552	76	0.00107353413186662
77	-0.00156959599571671	77	0.00158548823554483
78	-7.80728861458968E-4	78	0.00158706118216312
79	-6.18617272021282E-5	79	0.00148863412878075
80	-5.29945929441666E-5	80	0.00199020707539876
81	5.45872541313663E-4	81	0.00115178002201688
82	2.84739675571188E-4	82	8.63352968635489E-4
83	-7.63931901701653E-5	83	0.0014849259152534
84	-0.00119838479891587	84	0.0023062312075961
85	-0.00100102046491379	85	0.00269733575923148
86	-8.93656130910969E-4	86	0.00359844031086798
87	4.83708203091737E-4	87	0.00365954486250342
88	4.91072537093906E-4	88	0.00294064941413907
89	6.28436871096483E-4	89	0.00146175396577508
90	3.8574731382468E-4	90	6.28305701813048E-5
91	1.41602692151466E-4	91	-0.0010868474006287
92	-2.52541929521399E-4	92	-0.00157652537143882
93	-5.66686551194628E-4	93	-0.00164620334224796
94	-3.50831172867494E-4	94	-0.00200588131305857
95	-8.24975794539995E-4	95	-8.65559283868222E-4
96	-0.0010091204162137	96	6.34762745321815E-4
97	-0.0017940169980184	97	1.24488039461745E-4
98	-0.00117966553995519	98	-1.96383401450007E-4
99	3.24685918108081E-4	99	2.62745157638022E-4
100	0.00139903737617164	100	0.00170187371672714
101	0.00172338883423429	101	0.00254100227581588
102	0.00322774029229755	102	-0.00135986916509534
103	0.00231209175036184	103	-0.0139007406060063
104	0.00103018063268223	104	-0.0356531116084424
105	0.00154137090108719	105	-0.0657555381501931
106	0.00237256116949247	106	-0.0974279646919438
107	0.00108375143789718	107	-0.120810391233695
108	8.84941706302378E-4	108	-0.130132817775445
109	-2.8386802529301E-4	109	-0.124875244317196
110	-0.00174075435850085	110	-0.107688492086113
111	-0.00370507616052507	111	-0.0856928348245827
112	-0.00544939796254962	112	-0.0630871775630535
113	-0.0061737197645737	113	-0.0451215203015236
114	-0.0056880415665983	114	-0.0324158630399944
115	-0.00559236336862234	115	-0.0241402057784645
116	-0.0048966851706469	116	-0.0194545485169355
117	-0.00368772018575214	117	-0.0175609245933774
118	-0.0031791607864271	118	-0.015997544670376
119	-0.00338060138710183	119	-0.0136441647473751
120	-0.00283204198777742	120	-0.0110407848243739
121	-0.00289348258845124	121	-0.0090574049013723
122	-0.0033649231891264	122	-0.00681402497837258
123	-0.00402415602494255	123	-0.00532158736977717
124	-0.00299541488401367	124	-0.00490084592711426
125	-0.00320667374308403	125	-0.00521010448445036
126	-0.00322793260215537	126	-0.00470936304178693
127	-0.00331919146122672	127	-0.00460862159912434
128	-0.00245045032029712	128	-0.00461788015646114
129	-0.00242170917936768	129	-0.00461713871379743
130	-0.00316704589761319	130	-0.00462886124647
131	-0.00272848649828816	131	-0.00412111942595406
132	-0.00220992709896262	132	-0.00348337760543771
133	-0.00152136769963818	133	-0.00197563578492232
134	-0.00225280830031238	134	-8.9789396440576E-4
135	-0.00163424890098796	135	0.00104984785610984
136	-0.00124992328977491	136	8.36629458352611E-4
137	4.3881785115385E-4	137	0.00144101051491141
138	7.67558992083472E-4	138	9.05391571471625E-4
139	0.00174630013301247	139	0.00151977262803005
140	0.0015850412739411	140	8.64153684590363E-4
141	0.00108378241487017	141	0.00138853474115042
142	-1.67476444200787E-4	142	0.00140291579770935
143	-4.71574402259201E-4	143	0.00104450542494483
144	1.70047940019735E-4	144	3.65164575738319E-4
145	0.00111167028229797	145	1.58237265317496E-5
146	0.00118329262457717	146	-0.00100351712267432
147	0.001384914966855	147	-0.00116285797188009
148	9.76537309134606E-4	148	-0.00148219882108602
149	-4.7251568967166E-4	149	-0.0019724146090585
150	-0.0021307116057887	150	-0.0027058385058405
151	-0.00247890752190649	151	-0.00169926240262086
152	-0.00274710343802376	152	-0.00140268629940277
153	-0.00264529935414082	153	-0.00111611019618429
154	-0.00263349527025802	154	-2.29534092965444E-4
155	-0.00105169118637605	155	4.27042010252343E-4
156	-4.56374567014528E-4	156	8.60602416055123E-4
157	-5.37815167689359E-4	157	0.00128273433360793
158	-3.0925576836438E-4	158	0.00131486625115951
159	4.69303630961093E-4	159	4.69981687123422E-5
160	8.78630302860728E-5	160	-2.50869913736018E-4
161	5.64224296111249E-5	161	-4.48737996182835E-4
162	-2.60091792130268E-5	162	-0.00111729137636374
163	3.85613163064846E-4	163	-0.00123995654293996
164	-5.72764494655154E-4	164	3.27378290482905E-4
165	-7.11421523771349E-5	165	6.84713123906278E-4
166	-2.99519810098126E-4	166	-8.17952042670989E-4
167	5.62102532180475E-4	167	-8.00617209247179E-4
168	6.83724874458669E-4	168	-4.63282375823937E-4
169	0.00131010041699753	169	-7.49045961572214E-4
170	5.2190450088041E-4	170	-9.86814406785719E-4
171	3.03708584763029E-4	171	-2.4458285199902E-4
172	-0.00107448733135485	172	-5.23512972119278E-5
173	-0.00200268324747199	173	4.29880257573956E-4
174	-0.00202087916358895	174	-5.7788818763882E-4
175	-0.00270601213675281	175	-6.16038584718481E-4
176	-0.00336132685152002	176	-2.59154356069935E-4
177	-0.00343664156628876	177	-6.62270127419262E-4
178	-0.00371195628105614	178	-6.65385898769522E-4
179	-0.005077270995824	179	1.49832987972331E-6
180	-0.00435258571059194	180	2.18382558530017E-4
181	-0.00324790042536005	181	4.45266787179932E-4
182	-0.00248949885956673	182	5.4917892598727E-4
183	-0.00127787651728806	183	2.10515253598942E-4
184	1.37458249911404E-5	184	-6.5814841878975E-4
185	0.00112536816727005	185	-0.00161681209117859
186	2.76990509548547E-4	186	-0.00249547576356779
187	-4.13871481725892E-5	187	-0.00215413943595699
188	-8.97648058932887E-5	188	-0.00200280310834611
189	1.11857536384541E-4	189	-0.00122715373175719
190	-2.46520121336857E-4	190	-1.81504355170503E-4
191	9.15102220942821E-4	191	6.64145021416651E-4
192	0.00154672456322125	192	1.79794398005306E-4
193	5.48346905500097E-4	193	5.44377459199552E-6
194	-5.00307522210974E-5	194	-3.98906848819713E-4
195	-6.11629186428431E-4	195	-5.25904425780155E-4
196	-0.00107694390119573	196	-2.95956179910739E-4
197	-0.00130225861596411	197	1.63992065957963E-4
198	9.24266692683418E-5	198	9.83940311827247E-4
199	8.37111954500536E-4	199	0.00170388855769588
200	0.00180179723973239	200	0.0022438368035651
201	0.00103648252496491	201	0.0022737850494341
202	5.83869174536567E-4	202	0.00255947397347089
203	-8.44690224789169E-4	203	0.00167021987275007
204	-0.00130324962411343	204	0.00183096577202946
205	-0.00207180902343929	205	0.00141171167130949
206	-7.40368422763815E-4	206	7.12457570588576E-4
207	3.81072177910724E-4	207	-5.86796530131828E-4
208	7.85216047519022E-4	208	-3.0763488162755E-4
209	0.001089901332751	209	-0.00129728525705008
210	5.8458661798344E-4	210	-0.00136693563247192
211	5.92719032157518E-5	211	-9.46586007893657E-4
212	0.00111395718844776	212	-6.2623638331516E-4
213	0.00132864247367959	213	-8.75886758737288E-4
214	0.00107332775891233	214	-0.00107553713415864
215	0.00121801304414504	215	-0.00117275399616279
216	6.6269832937671E-4	216	-0.0016495652725963
217	-0.00130261638539064	217	-9.16376549030318E-4
218	-0.00148793110015877	218	1.68121745351968E-5
219	-0.00135324581492657	219	7.50000898101177E-4
220	-6.68560529693885E-4	220	0.0011431896216676
221	2.66124755538222E-4	221	0.00121711263581936
222	3.2081004077078E-4	222	9.8925248564985E-4
223	4.85495326003615E-4	223	0.00122139233548157
224	6.60180611236072E-4	224	9.7353218531282E-4
225	-3.51341035322861E-5	225	7.55672035143817E-4
226	-4.60448818300208E-4	226	0.00125781188497509
227	-8.35763533068246E-4	227	0.00106995173480584
228	-0.00100193533052462	228	-3.3790841536252E-4
229	-0.00175743178689647	229	-8.25768565531071E-4
230	-0.00122292824326831	230	-8.2362871569952E-4
231	-8.78424699640057E-4	231	-3.7148886586813E-4
232	-7.2392115601172E-4	232	-7.09349016037031E-4
233	3.10582387617053E-4	233	-1.0720916620599E-4
234	0.00184763136664667	234	6.23413202396783E-4
235	0.00207231665187901	235	0.0012594831273125
236	0.00122700193711101	236	9.15553052228013E-4
237	0.00122168722234317	237	0.00108162297714287
238	-1.3362749242507E-4	238	6.07692902058865E-4
239	-0.00140894220719279	239	9.1376282697464E-4
240	-0.00115425692195981	240	5.39832751890401E-4
241	-2.99571636727336E-4	241	8.97930604653929E-4
242	5.51136485045234E-5	242	0.00185683962855787
243	0.00133979893373759	243	0.00220574865246093
244	0.00188448421896847	244	0.00209465767636452
245	0.00202916950420118	245	0.00184356670026808
246	0.00199385478943359	246	7.52475724171475E-4
247	0.00232243619223649	247	9.92169177482793E-5
248	0.00212693973586475	248	5.75986091821079E-4
249	0.00154144327949357	249	8.6275526589219E-4
250	5.85946823121297E-4	250	0.00109952443996431
251	4.0045036675096E-4	251	0.0021762936140366
252	1.14953910379079E-4	252	6.63062788109237E-4
253	-5.50542545992627E-4	253	-0.0092101680378196
254	0.00156193497438117	254	-0.0281987695395056
255	0.00557662025961392	255	-0.0587070214166143
256	0.0103613055448459	256	-0.0996652732937235
257	0.0141059908300774	257	-0.142573525170833
258	0.0167806761153102	258	-0.177041777047941
259	0.0151553614005424	259	-0.200470028925049
260	0.00852004668577511	260	-0.20999803603863
261	-8.25268028992632E-4	261	-0.205177336789474
262	-0.0100405827437609	262	-0.190046637540317
263	-0.0187158974585282	263	-0.170365938291161
264	-0.0241312121732964	264	-0.149355239042004
265	-0.0256865268880642	265	-0.127924539792848
266	-0.0253718416028317	266	-0.108713840543691
267	-0.0235986887413722	267	-0.0933482321653374
268	-0.0202641851977443	268	-0.0819264419400838
269	-0.0170996816541162	269	-0.0712846517148309
270	-0.0146651781104881	270	-0.0621028614895778
271	-0.0126306745668598	271	-0.0538710712643251
272	-0.0103961710232312	272	-0.0469592810390722
273	-0.00865522592663126	273	-0.0400048894174256
274	-0.00788035889979533	274	-0.0349602600931851
275	-0.00699549187295911	275	-0.0309256307689445
276	-0.00612062484612341	276	-0.0270510014447032
277	-0.00522575781928669	277	-0.0236563721204632
278	-0.00514089079245039	278	-0.0212617427962218
279	-0.00400602376561476	279	-0.0190771134719814
280	-0.00353624760958038	280	-0.0160649736221501
281	-0.00234156232434746	281	-0.0134053232467286
282	-0.00215687703911538	282	-0.0109356728713061
283	-0.00158219175388297	283	-0.0084260224958852
284	-0.00135750646865151	284	-0.00544637212046339
285	-1.22821183419219E-4	285	-0.00297672174504093
286	2.4186410181315E-4	286	-0.00166707136961897
287	4.3986008203678E-4	287	-8.13511838676284E-4
288	6.37608310222859E-4	288	2.27229512842264E-4
289	1.15356538407774E-4	289	8.87970864360987E-4
290	-6.06895233405957E-4	290	3.18712215879202E-4
291	-4.19147005220388E-4	291	7.29453567396732E-4
292	-5.71398777033494E-4	292	5.10194918915907E-4
293	6.15504322498239E-4	293	3.9711811733234E-4
294	0.00114128058382779	294	-9.10495550527912E-5
295	0.00104705684515594	295	2.30782772562499E-4
296	-7.16689351509814E-6	296	-4.57384899823055E-4
297	5.68609367814332E-4	297	2.94447427791944E-4
298	-6.3561437085724E-4	298	-9.37202445934204E-5
299	-0.00117983810952804	299	-6.41887916978057E-4
300	-0.00126205891233777	300	-3.25929650809798E-4
301	-9.85639362843571E-4	301	9.40923727986487E-4
302	-0.00103921981334931	302	5.17777106782802E-4
303	-0.00107280026385581	303	0.00146463048557877
304	3.36192856380535E-5	304	0.00283148386437482
305	4.80038835132035E-4	305	0.00244833724317051
306	6.56108760047402E-4	306	0.00160484099738767
307	5.77549360722962E-4	307	0.00110671542736451
308	2.7898996139708E-4	308	3.58589857341052E-4
309	-4.69569437928641E-4	309	-1.69535712681856E-4
310	-6.78128837252601E-4	310	3.52338717294565E-4
311	-0.0012966882365788	311	5.74213147270797E-4
312	-0.0018952476359031	312	5.86087577247874E-4
313	-0.00139181007638456	313	0.00121796200722457
314	-0.00110706883016043	314	0.00109983643720124
315	-6.32327583937276E-4	315	4.81710867178187E-4
316	4.32413662286635E-4	316	4.03585297155118E-4
317	0.00104715490851071	317	0.00167545972713246
318	4.71896154733642E-4	318	0.00229733415710953
319	7.48619417255902E-4	319	0.00356684489328885
320	-3.5970227947324E-4	320	0.00451544639497659
321	-9.58023976203037E-4	321	0.00607404789666255
322	-0.00122634567293289	322	0.00690264939835039
323	-0.00101466736966227	323	0.00714125090003659
324	-0.00154298906639294	324	0.00651985240172426
325	-0.00156131076312249	325	0.0066084539034108
326	-0.00109857652518386	326	0.00514623717302509
327	-5.12156975690736E-4	327	0.00452374769861574
328	-2.85737426197308E-4	328	0.00415125822420581
329	3.70682123297605E-4	329	0.00346876874979696
330	0.00156710167279073	330	0.00187627927538703
331	0.00143352122228446	331	8.73789800977853E-4
332	9.69940771779143E-4	332	6.16908704922814E-4
333	6.9636032127196E-4	333	-4.62741670498978E-4
334	6.22779870766976E-4	334	-7.42392045919971E-4
335	0.00116919942026072	335	2.57957578657653E-4
336	8.55618969755056E-4	336	0.00172830720323613
337	5.52038519248121E-4	337	7.7865682781475E-4
338	8.84580687428027E-5	338	0.00159900645239208
339	-4.08335230235757E-4	339	0.00221992954551542
340	-0.00153033461533081	340	0.00229744007110533
341	-0.00169233400042668	341	0.00210495059669569
342	-0.00100433338552275	342	0.00262246112228581
343	-2.76332770617671E-4	343	0.00147997164787661
344	8.11667844286212E-4	344	-1.25178265326653E-5
345	0.0010210212289623	345	-4.64601715371771E-4
346	0.00174849123226206	346	-2.64252090794059E-4
347	0.00202596123556198	347	-8.53902466216638E-4
348	0.0014534312388621	348	-3.23552841638097E-4
349	1.40901242162705E-4	349	5.96796782940778E-4
350	-4.61628754537813E-4	350	0.00111714640751792
351	-3.34158751237545E-4	351	5.47496032096362E-4
352	-6.2602252917543E-4	352	2.35754706901403E-4
353	4.25447756153829E-5	353	-9.49866446156022E-5
354	1.71112080405322E-4	354	1.84272003865615E-4
355	3.09679385195771E-4	355	1.83530652346775E-4
356	2.9824668998657E-4	356	-1.67210699172138E-4
357	-1.23186005223097E-4	357	1.02047949310347E-4
358	2.85470101185403E-4	358	-3.95325538438129E-5
359	0.00137528062862735	359	-3.92022028252725E-4
360	0.00180509115606853	360	-6.34511502663138E-4
361	0.00121490168351102	361	4.82999022928254E-4
362	0.00180471221095235	362	7.60509548517696E-4
363	9.14522738392876E-4	363	2.18020074108871E-4
364	-2.85666734164636E-4	364	8.15530599698633E-4
365	-5.65135754334811E-4	365	8.48810325685179E-4
366	-1.9398038243601E-4	366	7.03090025348629E-4
367	6.71749894634033E-5	367	0.00246736972501083
368	4.58330361363224E-4	368	0.00294164942467301
369	0.00102948573326334	369	0.00189592912433678
370	0.00139064110516252	370	-1.97911760011493E-5
371	0.00119179647706158	371	-0.00343551147633914
372	5.64352814145686E-4	372	-0.00644516185176069
373	0.00109690915122851	373	-0.00702481222718188
374	0.00198946548831191	374	-0.00785446260260425
375	0.00181202182539408	375	-0.0074341129780251
376	0.00147457816247787	376	-0.00545376335344727
377	0.00187713449956117	377	-0.00533341372886831
378	0.00141033278067404	378	-0.00471924595118889
379	1.34271766436989E-4	379	-0.00327605722762314
380	-1.78924780147582E-6	380	-0.00202286850405731
381	5.22149737960831E-4	381	-0.0011496797804913
382	-5.93911276276948E-4	382	4.35089430750324E-5
383	-3.69972290513942E-4	383	-3.33023333594085E-5
384	2.53966695247243E-4	384	-8.80113609794009E-4
385	3.19105165327294E-4	385	-6.90197551280747E-4
386	0.0010043359034313	386	-0.00114591785161799
387	0.0022295666415344	387	-0.00149163815195585
388	0.00262479737963872	388	-0.00153735845229352
389	0.0015200281177421	389	-1.43078752630643E-4
390	0.00118525885584564	390	1.20094703159879E-6
391	4.90940551213903E-4	391	8.13096033335015E-4
392	4.3731918053691E-4	392	0.00149130580808166
393	-3.56302190141378E-4	393	0.00137951558282889
394	3.7007643918141E-4	394	4.77253575752457E-5
395	8.46455068503005E-4	395	2.85935132323445E-4
396	4.92833697825823E-4	396	3.44144907069577E-4
397	1.1921232714851E-4	397	2.35468181664089E-6
398	4.56395234171403E-4	398	3.30564456563209E-4
399	9.137121874776E-4	399	3.68774231310987E-4
400	0.00134102914078404	400	-3.93015993942036E-4
401	0.00136834609409053	401	-1.94806219195875E-4
402	0.0019256630473965	402	1.93403555551086E-4
403	0.00307298000070322	403	-0.00139838666970071
404	0.00560589610377971	404	-6.17491557075134E-4
405	0.00934285485637076	405	-0.00158426073114715
406	0.0144698136089616	406	-0.0064210299052192
407	0.0178267723615519	407	-0.0150577990792913
408	0.019383731114142	408	-0.0228445682533636
409	0.0170406898667332	409	-0.0348813374274357
410	0.0107776486193245	410	-0.0482081066015079
411	0.00205500782741641	411	-0.0568348757755794
412	-0.0066175237493562	412	-0.058771644949652
413	-0.0150300553261271	413	-0.0557484141237241
414	-0.0202425869028984	414	-0.0491451832977967
415	-0.023455118479669	415	-0.0390819524718689
416	-0.0232076500564409	416	-0.0297787216459406
417	-0.0214504543772369	417	-0.0227054908200124
418	-0.0182140769301036	418	-0.0181722599940848
419	-0.0160076994829721	419	-0.0148590291681572
420	-0.01161132203584	420	-0.012685798342229
421	-0.00973494458870849	421	-0.0107825675163014
422	-0.00784856714157556	422	-0.00899933669037356
423	-0.00617218969444355	423	-0.00764610586444547
424	-0.00395217583581431	424	-0.00659923862701994
425	-0.00350470741258491	425	-0.00485491682499539
426	-0.00194723898935667	426	-0.00300059502297145
427	0.00125022943387165	427	-0.00122627322094715
428	0.0111976978571002	428	2.80485810773001E-5
429	0.0224451662803293	429	0.00130237038310188
430	0.0327785438064323	430	0.00182260128800049
431	0.0406171032057578	431	8.78014066121757E-4
432	0.0454256626050826	432	5.34268442429209E-5
433	0.0417542220044078	433	-8.71160377636571E-4
434	0.0362027814037322	434	-0.0010157475995145
435	0.0313013408030578	435	-5.30334821394085E-4
436	0.0273099002023827	436	6.65077956726989E-4
437	0.023799914061013	437	0.00185908647833433
438	0.0215962915081445	438	0.00313009263521113
439	0.0190826689552761	439	0.00312109879208755
440	0.0164190464024081	440	0.00293210494896545
441	0.0142654238495412	441	0.0039831111058426
442	0.0110718012966728	442	0.00390411726271989
443	0.00799972420552919	443	0.00347372365081799
444	0.00554719262875736	444	0.00338499863243147
445	0.00458466105198685	445	0.00322627361404315
446	0.00412212947521517	446	0.00181754859565597
447	0.00438959789844429	447	0.00169882357726792
448	0.00431706632167206	448	0.00223009855888012
449	0.00288453474490069	449	0.00334137354049258
450	0.0013787823916438	450	0.00328291382584567
451	4.40614456022281E-4	451	0.00366465308900388
452	-6.0755347959951E-4	452	0.0035663923521625
453	-4.95721415220807E-4	453	0.00321813161532081
454	1.46110649157372E-4	454	0.00270987087847807
455	-7.92057286465031E-4	455	0.00287161014163662
456	-0.00127284210298129	456	0.0018133785768395
457	-9.14282703656788E-4	457	0.00182593465725223
458	-0.00249572330433079	458	0.00137849073766461
459	-0.00349716390500543	459	9.81046818076869E-4
460	-0.00192860450568055	460	9.03602898489453E-4
461	-9.10045106355284E-4	461	0.00295615897890222
462	-8.81485707029839E-4	462	0.00258871505931424
463	2.24038729837339E-4	463	0.0020518034507484
464	0.00124652820424664	464	0.00163542415320439
465	-5.60982321343495E-4	465	0.00139904485565978
466	-0.002288492846934	466	8.92665558115624E-4
467	-0.00249600337252431	467	7.96286260571932E-4
468	-0.00301351389811533	468	0.00165990696302654
469	-0.00281102442370518	469	0.00209352766548321
470	-0.00107462579377415	470	0.00247819184734155
471	8.48954656731848E-4	471	0.00115289467658553
472	8.52535107237706E-4	472	0.00100759750583013
473	0.00275611555774447	473	6.92300335074059E-4
474	0.00341969600825109	474	4.77003164318646E-4
475	0.00253327645875601	475	3.41705993562869E-4
476	4.90675062363444E-4	476	7.66793502519292E-4
477	6.4316453677371E-4	477	0.00155239391775819
478	-0.00163434598881729	478	0.00181799433299812
479	-0.00210185651440753	479	0.00219359474823744
480	-0.00127936703999776	480	0.00169919516347594
481	8.31224344119974E-5	481	4.74795578716325E-4
482	5.25611908821055E-4	482	-3.59604006044734E-4
483	0.00126222732178505	483	-6.93506782376119E-4
484	0.00178973784737568	484	-3.47349941693942E-4
485	0.00214724837296565	485	4.18806898986546E-4
486	0.00153475889855681	486	0.00189496373966769
487	0.00185226942414651	487	0.00164112058034949
488	0.00214977994973786	488	7.87277421030019E-4
489	0.00132547226957946	489	-1.06523538638825E-4
490	8.11891819073374E-4	490	-0.00109024853893924
491	0.00109831136856631	491	-0.001973973539239
492	4.24730918060945E-4	492	-0.002147698539539
493	-4.08849532445466E-4	493	-0.0013514235398393
494	-2.82429982950916E-4	494	-9.95148540138935E-4
495	-7.06010433457749E-4	495	8.11264595599326E-5
496	-0.00144440901074105	496	4.07154415405842E-4
497	-0.00190689848515113	497	0.00101312866606484
498	-0.00109938795956044	498	0.00102910291672487
499	-7.31877433969963E-4	499	0.00203507716738383
500	-2.84366908378964E-4	500	0.00139105141804485
501	9.33143617210419E-4	501	0.0011070256687038
502	0.00188891987853967	502	0.00126279425168985
503	0.00247036047921423	503	0.00119804866549078
504	0.00202180107988958	504	-2.36696920709711E-4
505	9.1324168056417E-4	505	-0.00107144250690894
506	5.84682281238536E-4	506	1.23811906892257E-4
507	-2.13877118086181E-4	507	2.79066320693744E-4
508	-0.00101243651741179	508	-0.00108567926550673
509	-0.00141181414880975	509	-0.00111134454775819
510	-6.8146452423079E-4	510	-4.27316395360755E-4
511	-9.21114899653297E-4	511	-0.00191328824296466
512	-0.0010907652750749	512	-0.00207926009056703
513	-0.00128041565049575	513	-7.352319381706E-4
514	-0.0010000660259184	514	1.18796214226613E-4
515	-0.00201483525263768	515	5.62468315294495E-4
516	-0.00140837360078194	516	9.34834894819936E-4
517	-8.21911948926335E-4	517	-3.72798525654083E-4
518	-7.3545029707045E-4	518	-0.00190043194612777
519	-3.78988645214129E-4	519	-0.0028580653666026
520	0.00139747300664084	520	-0.00245569878707652
521	5.43934658497669E-4	521	-0.00193333220755143
522	2.93368250885884E-4	522	-9.72310964813872E-4
523	9.21578025632641E-4	523	7.68073013127868E-4
524	9.19787800380156E-4	524	0.00132845699106987
525	6.57997575126856E-4	525	3.78840969012195E-4
526	2.86207349874168E-4	526	-2.30775053045917E-4
527	-4.55828753791465E-5	527	-2.20391075103521E-4
528	2.20886658087061E-4	528	1.19678206628393E-4
529	-4.73085256122552E-4	529	3.97859311100035E-4
530	-0.00151705717033135	530	9.66040415570468E-4
531	-0.00160102908454096	531	4.24221520042067E-4
532	-0.00136500099875114	532	-1.37597375486465E-4
533	-0.00119897291296045	533	-0.00131941627101551
534	4.77055172829921E-4	534	-0.00201123516654356
535	0.00133205720904339	535	-0.00203452219839662
536	0.001894630624939	536	-9.387592008121E-4
537	0.00239720404083599	537	-4.92996203227847E-4
538	0.00239977745673325	538	-3.87233205643156E-4
539	0.00226235087262872	539	-8.41470208058581E-4
540	0.00330492428852569	540	-0.00255570721047427
541	0.0033574667354177	541	-0.00358012268986574
542	0.00296960658524892	542	-0.00410685836994062
543	0.00265174643508015	543	-0.00364359405001657
544	0.00121388628491115	544	-0.00270032973009293
545	-6.43973865257053E-4	545	-0.00167706541016877
546	-0.00148183401542568	546	-7.93801090244628E-4
547	-0.00106969416559455	547	-1.40536770320665E-4
548	-8.77554315763085E-4	548	-9.84991142045644E-5
549	-6.85414465931622E-4	549	-6.07524566722972E-4
550	-0.00142327461610048	550	-3.96550019241992E-4
551	-9.61134766269467E-4	551	-0.00136557547175986
552	-9.18994916437654E-4	552	-0.00128460092427929
553	-1.68550666064249E-5	553	-0.00205362637679762
554	0.00310528478322425	554	-0.00198265182931667
555	0.00796742463305566	555	-0.00276362363164129
556	0.0121595644828867	556	-0.00564459543396634
557	0.0152117043327191	557	-0.0133355672362905
558	0.0159238441825504	558	-0.0229965390386155
559	0.0121659840323813	559	-0.0345375108409405
560	0.00622812388221217	560	-0.0482784826432647
561	-0.0018825544473815	561	-0.0588501964334318
562	-0.00913648452246552	562	-0.0627527663634169
563	-0.0156304145975499	563	-0.061255336293403
564	-0.0196243446726347	564	-0.0557379062233876
565	-0.0216382747477191	565	-0.0466504761533724
566	-0.0218722048228033	566	-0.0367630460833581
567	-0.0222661348978876	567	-0.0288856160133433
568	-0.0204057013318222	568	-0.0241193465698784
569	-0.0184457013318218	569	-0.0209431664053783
570	-0.0159457013318223	570	-0.0176969862408791
571	-0.0132057013318221	571	-0.0152408060763785
572	-0.0112157013318219	572	-0.0128046259118797
573	-0.010205701331822	573	-0.0111084457473796
574	-0.00878331671846233	574	-0.0102726198156322
575	-0.00789724679354631	575	-0.00890734133450088
576	-0.00772117686863094	576	-0.0073820628533694
577	-0.00715510694371524	577	-0.00660678437223883
578	-0.00811903701879935	578	-0.00544150589110792
579	-0.00809296709388363	579	-0.00400622740997747
580	-0.00795689716896852	580	-0.00375094892884587
581	-0.0069860300368374	581	-0.0038461448430489
582	-0.00568603003683776	582	-0.00398141982314204
583	-0.0044260300368375	583	-0.00331669480323438
584	-0.00384603003683814	584	-0.00253196978332682
585	-0.00370603003683811	585	-0.00315724476341916
586	-0.00338603003683779	586	-0.00416251974351134
587	-0.00360603003683746	587	-0.00417786069330717
588	-0.00360603003683746	588	-0.00336334091247625
589	-0.00329603003683765	589	-0.00307882113164659
590	-0.00190603003683787	590	-0.00194430135081713
591	-0.00310603003683774	591	6.0218430013137E-5
592	-0.00355603003683758	592	0.00131473821084338
593	-0.00231603003683745	593	0.00129925799167285
594	-0.00234182573394115	594	0.002063890116343
595	-0.00244556571207255	595	0.0014885528802413
596	-9.29305690203996E-4	596	7.23215644139685E-4
597	-6.03045668335689E-4	597	2.07878408037487E-4
598	-0.00154678564646726	598	1.22541171935886E-4
599	-0.00214052562459788	599	-0.00118279606416571
600	-0.0033243768835538	600	-4.78010498962789E-4
601	-0.0035385619849837	601	-2.32856529850167E-4
602	-0.00270274708641249	602	-4.87702560737269E-4
603	-0.00188693218784142	603	-4.52548591624691E-4
604	-0.00125111728927063	604	-2.37394622511822E-4
605	-0.00142530239070027	605	4.77593466010617E-5
606	-0.0010394874921289	606	6.42913315713756E-4
607	-0.00121460538454254	607	5.18666875796825E-4
608	-0.00101009639334837	608	7.46602722703216E-5
609	-9.0558740215485E-4	609	9.40653668742186E-4
610	-2.51078410961725E-4	610	9.66470652148388E-5
611	-2.2656941976873E-4	611	-3.07359538313179E-4
612	-8.82060428573972E-4	612	5.08633858158802E-4
613	-0.00174776123143072	613	-2.95160092002256E-4
614	-0.00206442708691412	614	-0.00202797583668168
615	-0.0018310929423988	615	-0.00173079158136069
616	-0.00162775879788324	616	-0.00185360732603979
617	-1.54424653366902E-4	617	-0.00204642307071978
618	7.18909491149056E-4	618	-0.0010792388153984
619	0.0028622436356649	619	-6.62054560078396E-4
620	0.00314490677491008	620	-8.73830071348003E-4
621	0.00239719713344755	621	-0.00147502767516983
622	0.00153948749198651	622	-0.00167622527899081
623	6.21777850524197E-4	623	-0.00146742288281132
624	-0.00105593179093688	624	-8.98620486633028E-4
625	-0.00107364143239952	625	5.01819095450884E-5
626	-0.00103144886585493	626	2.6922046690725E-4
627	-0.00110007123259415	627	-3.39772965871177E-4
628	1.13064006672658E-5	628	-7.88766398651219E-4
629	8.22684033928489E-4	629	-0.00111775983143136
630	8.14061667188781E-4	630	-0.0017367532642103
631	6.55439300449423E-4	631	-7.15746696990038E-4
632	2.06816933710385E-4	632	8.52598702296703E-5
633	-2.12252098501509E-4	633	0.00101792061641603
634	-0.00146165612981797	634	8.01821996824437E-4
635	-0.00260106016113415	635	-1.54276622767568E-4
636	-0.00230046419244978	636	-0.00171037524235906
637	-0.0016298682237661	637	-0.00259647386195017
638	-0.00144927225508251	638	-0.00318257248154108
639	-8.98699518484314E-4	639	-0.00320853952025146
640	-3.28754048183555E-4	640	-0.00199095387516568
641	-0.00110880857788409	641	-7.23368230080013E-4
642	-8.5886310758454E-4	642	1.42174150061791E-5
643	-8.08917637283635E-4	643	4.91803060092444E-4
644	-7.08972166984623E-4	644	0.00147938870517805
645	4.00973303315233E-4	645	0.00182697435026391
646	0.00208065889615838	646	0.00184686840925874
647	0.00211008461154361	647	0.00232907088216283
648	0.001149510326929	648	0.00229127335506707
649	8.78936042314038E-4	649	0.00202347582797113
650	-2.11638242300083E-4	650	0.00183567830087483
651	-7.8221252691435E-4	651	0.00204788077377938
652	-0.00105278681152932	652	0.00189008324668372
653	5.56231988512401E-4	653	0.00141748503933492
654	8.65235717616208E-4	654	8.3507939938432E-4
655	0.00129423944671991	655	7.12673759434068E-4
656	7.13243175821887E-4	656	7.60268119484486E-4
657	3.12246904925928E-4	657	0.00129786247953323
658	-0.00134874936597207	658	0.00193545683958352
659	-0.00182989344188833	659	0.00254559251097319
660	-0.00181123459116517	660	0.00256911659748127
661	-0.00168257574044262	661	0.00389264068398987
662	-0.00132391688972078	662	0.0038261647704978
663	-3.55258038998052E-4	663	0.00331968885700729
664	-5.56599188275442E-4	664	0.00295321294351591
665	-2.57940337553109E-4	665	0.00350673703002435
666	2.10518193798137E-4	666	0.00284572238090419
667	-3.61047313175433E-4	667	0.00822536308350852
668	4.77387179850908E-4	668	0.0220750037861128
669	0.00200582167287866	669	0.0337546444887167
670	0.00177425616590465	670	0.0408642851913212
671	0.00184269065893172	671	0.0422439258939251
672	0.00181109122020029	672	0.0352352500891584
673	9.59430704303266E-4	673	0.0179396045711266
674	7.77018840736332E-6	674	0.00206395905309442
675	-2.38903274887292E-5	675	-0.00969168646493834
676	-1.35550843385346E-4	676	-0.0162073319829705
677	4.52788640719071E-4	677	-0.0193329775010023
678	1.21128124822789E-4	678	-0.0200286230190345
679	-4.05560293517127E-5	679	-0.0190033264977769
680	5.97754677715834E-4	680	-0.0167678251853696
681	0.00130606538478517	681	-0.0154623238729608
682	0.00216437609185416	682	-0.0143068225605534
683	0.00264268679892332	683	-0.0113113212481455
684	0.00214099750599139	684	-0.0107958199357387
685	0.00100930265451105	685	-0.0102306136281678
686	7.87593906657946E-4	686	-0.00864614483268777
687	1.85885158805021E-4	687	-0.00727167603720957
688	-3.85823589047263E-4	688	-0.0074872072417298
689	-1.97532336899897E-4	689	-0.00437273844624997
690	-4.39241084753128E-4	690	-0.00422826965077139
691	-0.00139094983260613	691	-0.00367380085529234
692	-0.00189271253968837	692	-0.00276060975250569
693	-0.00168449323318054	693	-0.00184784454728337
694	-9.06273926672085E-4	694	-0.00236507934206109
695	-4.78054620163704E-4	695	-0.00162231413683855
696	2.70164686344998E-4	696	-7.69548931615738E-4
697	9.08383992853423E-4	697	-7.26783726393343E-4
698	4.46584567427522E-4	698	-6.04402148401739E-4
699	3.54716458241811E-4	699	2.26572796411695E-4
700	-9.57151650943011E-4	700	6.67547741225683E-4
701	-0.00156901976012769	701	9.85226860397148E-5
702	-0.00126088786931255	702	4.09497630852407E-4
703	0.0011372440215025	703	-5.29527424333764E-4
704	0.00328537591231814	704	-4.78552479520999E-4
705	0.00781344702132891	705	-7.28770385565625E-4
706	0.0111614893389591	706	-0.00372955332622738
707	0.0131695316565903	707	-0.0109603362668897
708	0.0146575739742199	708	-0.0188011192075521
709	0.0115656162918514	709	-0.0313519021482147
710	0.00583365860948248	710	-0.0459226850888772
711	-8.38312326003177E-4	711	-0.0563937138402411
712	-0.00874036278018586	712	-0.0603962174558195
713	-0.0170024132343682	713	-0.0597687210713982
714	-0.0214344636885508	714	-0.0543012246869781
715	-0.0241865141427331	715	-0.044823728302557
716	-0.0247385645969151	716	-0.0352462319181353
717	-0.0238906150510978	717	-0.0269387355337143
718	-0.0221127237730485	718	-0.020992261252653
719	-0.0196248701976716	719	-0.0172564483325912
720	-0.0168070166222956	720	-0.0144206354125282
721	-0.0144891630469202	721	-0.0118748224924659
722	-0.0117713094715439	722	-0.0107190095724023
723	-0.0105734558961679	723	-0.00839319665234051
724	-0.00935560940429703	724	-0.0054375013218344
725	-0.00826785499799154	725	-0.00402333465557181
726	-0.00792010059168469	726	-0.00238916798930866
727	-0.00715234618537952	727	-6.35001323045614E-4
728	-0.00572459177907358	728	-1.50834656781562E-4
729	-0.00445683737276692	729	-4.86667990518441E-4
730	-0.00362908296646225	730	1.77498675744125E-4
731	-0.0030213833999948	731	-1.09196645444065E-4
732	-0.00251373136138788	732	-1.26639022422381E-4
733	-0.00228607932278102	733	5.59186005988366E-5
734	-0.00192842728417375	734	5.58476223620374E-4
735	-0.00234077524556753	735	0.0016710338466428
736	-0.00192312320696075	736	0.00135359146966429
737	-0.00169547116835389	737	0.00215614909268602
738	-0.00193792469607423	738	0.0019371348830246
739	-0.00342037822379471	739	0.00161812067336342
740	-0.00203283175151547	740	0.0021991064637028
741	-0.00199528527923576	741	0.00417009225404197
742	-0.00246773880695716	742	0.00342107804438019
743	-0.00127019233467696	743	0.00338206383471995
744	3.77303639586657E-4	744	0.004292337121929
745	-7.25258653091032E-4	745	0.00365178829014479
746	-0.00114782094576782	746	0.00302123945835842
747	9.96167615543442E-5	747	0.00408069062657379
748	-9.72945531121816E-4	748	0.00389014179478853
749	-0.00117550782379894	749	0.00332959296300306
750	1.7192988352388E-4	750	0.00330904413121758
751	0.00150926362466119	751	0.00277710484583604
752	0.00120658936839835	752	0.00261505860248512
753	0.00166391511213693	753	0.00188301235913446
754	9.41240855874881E-4	754	9.00966115783497E-4
755	-2.81433400387776E-4	755	0.00115891987243266
756	-0.00113410765664845	756	0.00198687362908245
757	-0.0014268271552087	757	0.00189425373533503
758	-0.00204961657368496	758	0.00274074729097684
759	-0.00127240599216094	759	0.00315724084661895
760	-0.00100519541063715	760	0.00166373440226053
761	-0.00125798482911232	761	3.90227957902667E-4
762	-0.00117077424758882	762	-3.83278486454586E-4
763	-2.53563666063883E-4	763	-4.06784930813586E-4
764	-0.00121645453669039	764	-0.00109150579007089
765	-0.00120936231600854	765	-0.0013464290518117
766	-0.0012622700953262	766	-0.00168135231355304
767	-9.75177874644295E-4	767	-0.00181627557529396
768	-9.18085653962564E-4	768	-0.00229119883703444
769	1.09006566719749E-4	769	-0.00136612209877551
770	7.66059714714551E-4	770	-1.51457430026092E-4
771	0.00168303037592565	771	7.92337314203806E-4
772	0.0013400010371365	772	3.36132058432526E-4
773	0.00198697169834716	773	-2.40073197337765E-4
774	0.00174394235955866	774	-5.36278453107997E-4
775	-1.19086979230687E-4	775	-6.52483708878826E-4
776	-3.21163180192485E-5	776	-7.48688964649524E-4
777	4.24756907743351E-4	777	7.74281929160736E-4
778	-3.28396439798873E-4	778	0.00157702813649241
779	-9.91549787341839E-4	779	0.0022097743438243
780	-6.64703134883204E-4	780	0.00239252055115546
781	-8.47856482424802E-4	781	0.00226526675848771
782	-0.00125100982996695	782	0.00108801296581973
783	-0.00212418916859924	783	0.00144053508400166
784	-0.00118744648049951	784	0.00130238493473467
785	9.59296207599714E-4	785	0.0016742347854688
786	0.00102603889569775	786	0.0017760846362016
787	0.00152278158379726	787	0.00224793448693639
788	0.00165952427189708	788	0.00248978433767011
789	0.00109626695999498	789	0.00190163418840239
790	4.5296751770163E-4	790	6.52790910955048E-4
791	-2.30348776749878E-4	791	-9.46329617765862E-4
792	-9.83665071201401E-4	792	-0.00175545014648559
793	-0.00166698136565291	793	-0.00230457067520717
794	-0.00144029766010334	794	-0.00198369120392794
795	-0.0010536139545545	795	-0.00230281173264846
796	-7.36933935312045E-4	796	-8.12132181299496E-4
797	-5.90270873078502E-4	797	8.27627738369863E-4
798	4.16392189153569E-4	798	0.00159738765804018
799	5.30552513868798E-5	799	0.00134714757770915
800	-2.60281686379926E-4	800	0.00179690749738004
801	2.2638137585318E-4	801	9.06667417050144E-4
802	1.33044438086039E-4	802	-4.23572663280858E-4
803	8.97416910516924E-5	803	-0.00166459778196426
804	1.06457938868765E-4	804	-0.00229605903306673
805	-1.68258133133037E-5	805	-0.00197752028416787
806	-3.80109565496056E-4	806	-5.18981535270413E-4
807	2.06606682320754E-4	807	8.95572136272449E-5
808	8.63322930138466E-4	808	9.28095962525077E-4
809	0.00127005255779977	809	0.00116649548566095
810	6.96893684167144E-4	810	0.00132373479411374
811	1.8373481053402E-4	811	9.00974102566288E-4
812	-6.19424063098784E-4	812	-7.17865889807712E-5
813	-9.62582936732126E-4	813	-6.24547280528631E-4
814	-4.75741810364916E-4	814	-4.67307972076725E-4
815	-5.68900683997953E-4	815	9.99313363756471E-5
816	-1.01954249658753E-4	816	-3.6219239794022E-6
817	3.95071165660177E-4	817	3.42230389058784E-4
818	2.52096580977579E-4	818	7.18082702096723E-4
819	-5.90878003703388E-4	819	9.83935015134385E-4
820	7.8614741161509E-4	820	4.97873281730676E-5
821	0.00162317282693358	821	-2.9436035878927E-4
822	0.00164020678516152	822	2.81438349207797E-4
823	0.00170747140193495	823	-5.34210278906322E-4
824	0.00192473601870802	824	-0.00166985890701987
825	0.00143200063548132	825	-9.85507535133046E-4
826	4.29265252254396E-4	826	-8.21156163246073E-4
827	-2.33470130971192E-4	827	-0.00109680479135932
828	-4.86205514198979E-4	828	-9.42453419473743E-4
829	-7.38823262588006E-4	829	-6.08888413542452E-4
830	-0.00163132337614069	830	-1.961097735661E-4
831	-0.00169382348969371	831	-4.73331133591159E-4
832	-5.9632360324624E-4	832	-5.00552493615025E-4
833	-8.58823716798796E-4	833	2.22226146360249E-4
834	-1.32383035200689E-6	834	9.55004786336922E-4
835	2.26176056095539E-4	835	-6.42216573687016E-4
836	2.73909706300479E-4	836	-9.00941612795414E-4
837	-1.88347985577764E-4	837	-8.99722343720377E-4
838	-1.40605677456662E-4	838	-9.18503074645471E-4
839	-7.22863369334803E-4	839	-7.47283805570653E-4
840	7.48789387863269E-5	840	-2.76064536495646E-4
841	4.5262124690737E-4	841	-3.44845267421512E-4
842	4.004806330693E-4	842	-8.64260235999836E-4
843	9.68496123284091E-4	843	-0.00173452085478232
844	0.00140651161349936	844	-0.00152478147356572
845	2.34527103713411E-4	845	-0.00210504209234941
846	-3.27457406071652E-4	846	-0.00260530271113169
847	-1.7944191585606E-4	847	-0.00316556332991524
848	-4.01426425642448E-4	848	-0.00308582394869816
849	-0.00148315471918803	849	-0.0035771962351383
850	-1.94852266785617E-4	850	-0.00234870192169812
851	-1.9654981438233E-4	851	-0.00172020760825742
852	0.00157175263802056	852	-2.51713294817435E-4
853	0.00370005509042315	853	-1.63218981376723E-4
854	0.00661835754282603	854	0.00141527533206354
855	0.00860676417226802	855	0.00111345605183111
856	0.0119253583203802	856	-0.00228892769700995
857	0.0136939524684925	857	-0.00929131144585238
858	0.0132325466166048	858	-0.0171536951946942
859	0.0112911407647163	859	-0.0280960789435367
860	0.00625973491282839	860	-0.0422584626923781
861	3.78329060940708E-4	861	-0.0519108464412197
862	-0.00710283315230065	862	-0.0564936408265586
863	-0.0134939424006193	863	-0.0578365244806989
864	-0.0182350516489391	864	-0.055469408134841
865	-0.0196761608972578	865	-0.0469022917889825
866	-0.0206072701455762	866	-0.0377451754431242
867	-0.0206483793938954	867	-0.0298680590972662
868	-0.0189394024960921	868	-0.02269097753664
869	-0.0177502102329834	869	-0.0180639829390996
870	-0.0171210179698749	870	-0.0148469883415574
871	-0.0154618257067662	871	-0.0113399937440155
872	-0.0139526334436582	872	-0.00938299914647445
873	-0.012353441180549	873	-0.00782600454893245
874	-0.00980424891744036	874	-0.00599900995139091
875	-0.00774482683986744	875	-0.00431182304734978
876	-0.00780532815747215	876	-0.00448457204114217
877	-0.00654582947507798	877	-0.0044573210349359
878	-0.0061863307926826	878	-0.00369007002872745
879	-0.00707683211028787	879	-0.0036028190225208
880	-0.00754733342789304	880	-0.00327556801631346
881	-0.0059877680325382	881	-0.00205818103175215
882	-0.00548795802299828	882	-4.40295459895879E-4
883	-0.00433814801345811	883	-1.24098880398549E-5
884	-0.0035283380039175	884	2.15475683816635E-4
885	-0.00218852799437741	885	-2.86638744327661E-4
886	-0.00172871798483687	886	-6.58753172470661E-4
887	-0.00283890797529729	887	-0.00104086760061506
888	-0.00360888337771836	888	-1.22294824115521E-4
889	-0.00295875713317439	889	0.00131660347037244
890	-0.00297863088862904	890	0.0034355017648604
891	-0.00254850464408474	891	0.00320440005934852
892	-0.0017283783995401	892	0.00401329835383635
893	-0.00181825215499476	893	0.00287219664832428
894	-0.00206808003289805	894	0.00264129363989962
895	-0.00145763264549093	895	0.00156158281400209
896	-0.00136718525808366	896	0.00243187198810357
897	-2.26737870676175E-4	897	0.0026721611622067
898	3.63709516732591E-4	898	0.00297245033630844
899	5.34156904140382E-4	899	0.00174273951041037
900	3.34604291547969E-4	900	0.00142302868451338
901	2.75249638321817E-4	901	0.00148439191654948
902	-7.39769235478249E-5	902	3.66450127248008E-4
903	4.16796514581819E-4	903	2.2850833794763E-4
904	6.47569952711535E-4	904	0.00109056654864581
905	7.834339084134E-5	905	0.00100262475934532
906	8.59116828971551E-4	906	6.14682970043745E-4
907	4.89913907000705E-4	907	0.00165689455171325
908	6.21018303711196E-4	908	0.0021610999559929
909	4.42122700422765E-4	909	0.00166530536027132
910	9.63227097132702E-4	910	0.00184951076455064
911	-1.6566850615618E-4	911	0.00264371616882997
912	-1.44564109445078E-4	912	0.00213792157310877
913	-4.63459712734426E-4	913	0.0015921269773882
914	-7.21753781816048E-5	914	0.00221768492144214
915	-4.0073509750016E-4	915	0.00293441506663594
916	-0.00116929481681893	916	0.00205114521183081
917	-8.67854536137358E-4	917	0.00125787535702404
918	-2.56414255455972E-4	918	0.0014046055022181
919	-4.34973974774877E-4	919	0.00103133564741231
920	-2.43533694093578E-4	920	0.00168806579260661
921	0.00114824799235613	921	0.00194765113677153
922	0.00146002967880499	922	0.00341723648093595
923	-1.18188634745664E-4	923	0.0035168218251016
924	-2.6640694829716E-4	924	0.0038164071692659
925	-5.64625261848306E-4	925	0.00263599251343116
926	-0.0010128435753991	926	0.00316557785759652
927	-0.00104090307429416	927	0.00225652053330183
928	5.51220674490871E-4	928	0.00199902936078455
929	6.5334442327547E-4	929	0.00158153818826623
930	0.00125546817206068	930	0.00104404701574889
931	0.00169759192084484	931	0.00115655584323093
932	0.00174971566963045	932	0.00197906467071363
933	0.0013318394184143	933	0.00158157349819543
934	0.00194426205150666	934	0.00138654926252801
935	0.00220670767569953	935	0.00163171479123214
936	0.00142915329989268	936	8.56880319936693E-4
937	0.00125159892408622	937	7.22045848640995E-4
938	0.00200404454827829	938	8.77211377344977E-4
939	0.00118649017247208	939	0.00132237690604953
940	5.09015439054572E-4	940	0.00220839576137433
941	6.6166378933108E-4	941	0.00260573339420311
942	-9.25687860392266E-4	942	0.00198307102703232
943	-0.00216303951011643	943	0.00252040865986203
944	-0.00235039115983948	944	0.0018677462926906
945	-0.00259774280956471	945	1.95083925520478E-4
946	-0.00237509445928819	946	-0.00139757844165
947	-8.82397415316483E-4	947	-0.00181896804454595
948	-1.49692255727807E-4	948	-0.00146014552006246
949	9.53012903859296E-4	949	-0.00147132299557917
950	0.00155571806344668	950	-8.92500471095126E-4
951	9.58423223035076E-4	951	7.76322053388512E-4
952	0.0012811283826224	952	0.001745144577872
953	-3.6178218745242E-5	953	0.00126421219285788
954	-0.00127350964879369	954	0.00154379722112541
955	-0.00112084107884325	955	0.00159338224939365
956	-2.81725088919771E-5	956	6.42967277661555E-4
957	-5.35503938941417E-4	957	-3.17447694071049E-4
958	7.17164631010014E-4	958	-5.37862665804134E-4
959	0.00107983320096139	959	-4.68277637535763E-4
960	3.42396906934717E-4	960	-6.38698140740246E-4
961	-6.85067986355925E-4	961	-1.99120152526433E-4
962	-9.02532879647922E-4	962	1.40457835686725E-4
963	-0.00107999777293877	963	8.70035823898441E-4
964	-9.87462666230066E-4	964	8.96138121122547E-5
965	-0.00157492755952227	965	-8.7080819967511E-4
966	-0.00160244429430545	966	-0.00106142518977403
967	-0.00139011655356391	967	-0.00198262711481068
968	-0.00175778881282351	968	-0.00322382903984586
969	-0.00140546107208195	969	-0.00290503096488237
970	-5.93133331340923E-4	970	-0.00238623288991757
971	-6.50805590599823E-4	971	-0.00193743481495456
972	-0.00141847784985849	972	-0.00157863673998992
973	-0.00197628956903717	973	-7.70831084011547E-4
974	-0.00211415707218432	974	-2.43422395628912E-4
975	-0.00186202457533113	975	-3.60137072457078E-5
976	-0.00107989207847758	976	-0.00120860501886266
977	4.32240418375862E-4	977	-3.31196330479067E-4
978	9.64372915229106E-4	978	-6.73787642096357E-4
979	8.86488344383096E-4	979	-4.16700549115134E-4
980	6.48525262122668E-4	980	-7.01092794981761E-4
981	3.70562179861089E-4	981	-0.00276548504084939
982	8.12599097600675E-4	982	-0.00524987728671622
983	0.00174463601534036	983	-0.00619426953258451
984	0.00172667293307871	984	-0.00621866177845121
985	0.0028387098508178	985	-0.0050230540243188
986	0.00374073261068109	986	-0.00216869126322727
987	0.00319274750505638	987	-5.45020164936183E-4
988	0.00259476239943179	988	9.86509333555929E-5
989	0.00199677729380632	989	1.1232203164635E-4
990	-1.91207811817584E-4	990	-4.00687006241185E-6
991	-0.00122919291744239	991	1.69664228228505E-4
992	-0.00205718563290525	992	7.3315128894702E-4
993	-0.00299524176369204	993	0.00104510470322783
994	-0.00287329789447721	994	8.70581175078655E-5
995	-0.00151135402526315	995	-0.00110098846821138
996	-0.00133941015604933	996	-0.00124903505393092
997	-8.67466286835317E-4	997	-0.00138708163965084
998	-4.35522417620682E-4	998	-0.00116512822537018
999	-6.83628127791103E-4	999	-9.7400229839284E-4
1000	-0.00144177102249987	1000	-0.00113349698689103
1001	-0.00171991391720905	1001	-0.00147299167539039
1002	-0.0011880568119178	1002	-0.00217248636388945
1003	0.00116380029337382	1003	-0.00361198105238802
1004	0.00454565739866464	1004	-0.00189147574088722
1005	0.00849751262351628	1005	5.88988752943109E-4
1006	0.0115993170764863	1006	-7.71648830359517E-4
1007	0.0129011215294552	1007	-0.00484228641366258
1008	0.0114529259824234	1008	-0.0104129239969639
1009	0.00759473043539316	1009	-0.0198135615802668
1010	0.00209653488836192	1010	-0.0336641991635691
1011	-0.00340166065866931	1011	-0.0457948367468708
1012	-0.00899986447345302	1012	-0.0534858911800624
1013	-0.013478076555991	1013	-0.0564473624631425
1014	-0.0167562886385282	1014	-0.055738833746223
1015	-0.0187445007210654	1015	-0.0500403050293032
1016	-0.0208427128036028	1016	-0.0412717763123833
1017	-0.02154092488614	1017	-0.0324732475954637
1018	-0.0211491369686776	1018	-0.0265747188785443
1019	-0.0194573301692387	1019	-0.0218066959340639
1020	-0.0172055226704666	1020	-0.017808691721898
1021	-0.0156237151716958	1021	-0.0158506875097304
1022	-0.0132819076729236	1022	-0.0151626832975644
1023	-0.0114901001741519	1023	-0.0133446790853977
1024	-0.0102582926753803	1024	-0.0114366748732309
1025	-0.0103164613059832	1025	-0.00808876293666216
1026	-0.00858459810908663	1026	-0.00537097403422315
1027	-0.00785273491218952	1027	-0.00346318513178456
1028	-0.00745087171529324	1028	-0.00200539622934581
1029	-0.00602900851839561	1029	-0.00260760732690635
1030	-0.00400714532149848	1030	-0.00392981842446805
1031	-0.00362528212460145	1031	-0.00425202952202852
1032	-0.00379333695007933	1032	-0.00427415679343213
1033	-0.00332138193824161	1033	-0.00355627400569603
1034	-0.00427942692640393	1034	-0.00198839121796013
1035	-0.00472747191456602	1035	-0.00110050843022425
1036	-0.00402551690272901	1036	-1.22625642488217E-4
1037	-0.00247356189089043	1037	0.0017052571452485
1038	-0.00144156118914029	1038	0.00119328389024176
1039	-1.94782455462672E-5	1039	7.31569758300132E-4
1040	6.4260469804811E-4	1040	-3.01443736416829E-5
1041	8.84687641642401E-4	1041	-2.31858505583382E-4
1042	5.76770585236197E-4	1042	-2.23572637525926E-4
1043	5.58853528831449E-4	1043	5.94713230531951E-4
1044	3.60936472425522E-4	1044	2.82999098590864E-4
1045	-2.36845829795662E-4	1045	7.21870049970263E-4
1046	-5.74598837630447E-4	1046	0.00105086819337519
1047	-6.8235184546328E-4	1047	9.89866336780665E-4
1048	2.49895146703594E-4	1048	0.00118886448018607
1049	-1.47857861129808E-4	1049	0.00248786262359157
1050	4.44389131036615E-4	1050	0.00317686076699708
1051	6.76693313314658E-4	1051	0.00365615075908021
1052	5.49140470869069E-4	1052	0.00272617037285805
1053	-4.78412371576198E-4	1053	0.00288618998663637
1054	-5.59652140212918E-5	1054	0.00269620960041461
1055	-6.53518056466851E-4	1055	0.00158622921419216
1056	-5.01070898911493E-4	1056	5.56248827970229E-4
1057	-4.78623741357431E-4	1057	0.00109626844174837
1058	-0.0011159993721499	1058	9.07286054573575E-4
1059	-7.93315932390293E-4	1059	6.78636333748983E-4
1060	-4.2063249263169E-4	1060	0.00153998661292398
1061	-9.79490528720817E-5	1061	0.00208133689209866
1062	1.34734386886493E-4	1062	0.00254268717127459
1063	3.47417826644936E-4	1063	0.0028540374504491
1064	-7.39840362378175E-4	1064	0.00167573912828711
1065	-0.00103688452359929	1065	8.38729267884197E-4
1066	-0.00134392868482092	1066	-6.88280592517465E-4
1067	-6.6097284604183E-4	1067	-0.00180529045291955
1068	-5.80170072632669E-5	1068	-0.00249230031332193
1069	8.6493883151384E-4	1069	-0.00168931017372387
1070	0.00107789467029296	1070	-4.96320034126363E-4
1071	4.2105985910279E-4	1071	0.00110799267881134
1072	-1.05675786283399E-4	1072	0.00200293187385636
1073	-0.00104241143166917	1073	0.00220787106890175
1074	-0.00134914707705569	1074	0.002392810263947
1075	-0.00110588272244172	1075	0.00186774945899248
1076	-2.72618367826993E-4	1076	0.00107268865403753
1077	3.30695220022825E-4	1077	-4.02049556950779E-4
1078	0.00192430420728762	1078	-2.44852204144053E-4
1079	0.00212791319455263	1079	3.62345148664289E-4
1080	0.0020615221818181	1080	6.95425014711759E-5
1081	0.0019551311690833	1081	2.16739854279169E-4
1082	0.00123874015634939	1082	5.23937207086433E-4
1083	3.22349143614176E-4	1083	3.81134559892971E-4
1084	-5.23810694239124E-4	1084	-1.20116504717771E-4
1085	-0.00140982094834552	1085	0.00114963639587007
1086	-0.00134583120245235	1086	0.00187938929645792
1087	-0.00119184145655993	1087	0.00247914219704537
1088	-0.00192785171066667	1088	0.00247889509763422
1089	-0.00162386196477282	1089	0.00316864799822092
1090	-4.39841858069556E-4	1090	0.00229859558429357
1091	-8.05427060827313E-4	1091	0.00181107408165726
1092	-0.00181101226358571	1092	0.00140355257902147
1093	-0.00148659746634383	1093	8.46031076385145E-4
1094	-8.62182669101763E-4	1094	4.98509573748862E-4
1095	-8.87767871859957E-4	1095	3.50988071113001E-4
1096	-6.63353074617845E-4	1096	8.33466568476382E-4
1097	6.13403492524256E-5	1097	0.00130736880050897
1098	4.56275249535842E-4	1098	0.00166250493592024
1099	0.00100121014981891	1099	9.4764107133205E-4
1100	8.86145050102094E-4	1100	0.00138277720674473
1101	0.00120107995038499	1101	7.3791334215656E-4
1102	0.00137601485066874	1102	-1.96950522432182E-4
1103	0.00123094975095128	1103	-4.01814387020139E-4
1104	2.66511035597716E-4	1104	-3.24231430498756E-4
1105	5.82072320244542E-4	1105	-5.36648473977941E-4
1106	-1.23663951088204E-5	1106	-7.79065517456878E-4
1107	2.31948895388356E-5	1107	-2.91482560935918E-4
1108	9.2875617418553E-4	1108	-2.38996044155115E-5
1109	0.00131431745883148	1109	-7.63166478945365E-5
1110	0.00118019403612024	1110	-3.77703844008259E-4
1111	0.00144643441260861	1111	-6.67902754702965E-4
1112	4.12674789098233E-4	1112	-0.00151810166539601
1113	-6.51084834412785E-4	1113	-0.00202830057608949
1114	-4.1484445792328E-4	1114	-0.00204849948678376
1115	-9.08604081434561E-4	1115	-0.00189869839747825
1116	-0.00114236370494414	1116	-0.0011088973081721
1117	-9.45476571885706E-4	1117	-2.67151332032256E-4
1118	-8.48539688321992E-4	1118	-7.52557492127437E-5
1119	-0.00110160280475746	1119	-5.33601663930128E-5
1120	-0.00175466592119378	1120	-3.4146458357398E-4
1121	-8.27729037628622E-4	1121	-5.39569000754803E-4
1122	-4.07921540652723E-5	1122	1.72326582063675E-4
1123	-3.43557986219878E-4	1123	-3.34953581362818E-4
1124	-9.05864379032728E-4	1124	-2.09598980793757E-5
1125	-7.8170771845798E-5	1125	-9.46966214796063E-4
1126	-1.00477164658663E-4	1126	-0.00207297253151317
1127	5.17216442529111E-4	1127	-0.0028489788482311
1128	0.00121491004971563	1128	-0.00201498516494691
1129	0.00115260365690339	1129	-0.00134099148166467
1130	0.00154102535381728	1130	5.24886889407661E-4
1131	7.69568399020315E-4	1131	0.00158107937510987
1132	8.11144422296906E-6	1132	0.00151727186081274
1133	9.66544894254184E-5	1133	0.00191346434651596
1134	4.65197534627926E-4	1134	0.00172965683221893
1135	3.53740579830841E-4	1135	8.45849317921754E-4
1136	4.72574621989352E-4	1136	2.27937367407449E-5
1137	1.82022991056741E-4	1137	-8.86744300858666E-5
1138	3.11471360123328E-4	1138	-0.00123014259691345
1139	5.50919729190191E-4	1139	-0.00148161076374009
1140	-2.196319017429E-4	1140	-0.00103307893056659
1141	2.7981646732389E-4	1141	7.54529026067985E-5
1142	-5.07351636089837E-5	1142	0.00133398473577984
1143	-3.60551891787964E-4	1143	0.00155442964530383
1144	-0.00113016819194378	1144	7.05396302923766E-4
1145	-9.29784492099905E-4	1145	4.66362960541922E-4
1146	-0.00189940079225615	1146	8.37329618161853E-4
1147	-9.79017092411105E-4	1147	-4.91703724218695E-4
1148	-0.00129863339256708	1148	-4.30737066599463E-4
1149	-0.00107800272149738	1149	7.08554109358772E-5
1150	-6.16631136750811E-4	1150	-9.4567465177775E-4
1151	-4.85259552005068E-4	1151	-0.00254220471449074
1152	-2.1388796725752E-4	1152	-0.00132873477720441
1153	0.00151748361748894	1153	-0.00180526483991805
1154	0.00272885520223465	1154	-0.00159179490263117
1155	0.00408022678698217	1155	-4.48324965345748E-4
1156	0.00610236203914472	1156	-0.00149303025962055
1157	0.00702480275827444	1157	-0.00691700564652109
1158	0.00586724347740386	1158	-0.0143109810334208
1159	0.00317968419653347	1159	-0.0231149564203212
1160	-0.00168787508433699	1160	-0.0356689318072219
1161	-0.00782543436520644	1161	-0.0468929071941222
1162	-0.0140427879219738	1162	-0.0532764170281625
1163	-0.0188991951478679	1163	-0.0533177853190514
1164	-0.0224156023737603	1164	-0.0499491536099406
1165	-0.0237120095996533	1165	-0.0419005219008293
1166	-0.0231884168255458	1166	-0.031551890191718
1167	-0.0226948240514391	1167	-0.0227332584826065
1168	-0.0216912312773321	1168	-0.0167446267734945
1169	-0.0196068445903581	1169	-0.0147742853753918
1170	-0.0175420168406788	1170	-0.0135029941500697
1171	-0.0157271890910007	1171	-0.0122817029247484
1172	-0.0143423613413214	1172	-0.0109604116994273
1173	-0.013237533591643	1173	-0.0102591204741058
1174	-0.0115927058419647	1174	-0.00858782924878465
1175	-0.0103077368891258	1175	-0.00683624745884792
1176	-0.00997159124328117	1176	-0.0057822442971176
1177	-0.00866544559743598	1177	-0.00453824113538737
1178	-0.00790929995159217	1178	-0.00253423797365837
1179	-0.00681315430574791	1179	-5.20234811927978E-4
1180	-0.00644700865990266	1180	-1.62316501981508E-5
1181	-0.00506086301405873	1181	4.67771511532433E-4
1182	-0.00390391690149361	1182	2.23354305608936E-4
1183	-0.00262637043888958	1183	-6.69878176054794E-4
1184	-0.00264882397628607	1184	-3.53110657718148E-4
1185	-0.00309127751368177	1185	0.00119365686061901
1186	-0.00372373105107737	1186	0.00107042437895455
1187	-0.00442618458847299	1187	0.0010271918972915
1188	-0.00430858513524957	1188	0.00120406001479978
1189	-0.00442955493529062	1189	3.73644309942023E-4
1190	-0.00327052473533218	1190	-8.67713949164184E-5
1191	-0.00236149453537404	1191	1.12812900225912E-4
1192	-0.00172246433541545	1192	0.0013223971953682
1193	-0.00218343413545696	1193	0.00320198149050999
1194	-0.00193440393549871	1194	0.00373156578565226
1195	-0.00100459040656631	1195	0.00286258467929645
1196	-0.00122399354865799	1196	0.00346503817144139
1197	-0.00119339669075114	1197	0.0031974916635864
1198	-7.32799832844577E-4	1198	0.00170994515573231
1199	-0.00101220297493754	1199	0.00175239864787713
1200	-0.00135160611703089	1200	0.00297485214002258
1201	-0.00105100925912271	1201	0.00181730563216931
1202	-4.18821736193564E-4	1202	7.22576398045405E-4
1203	3.34247002555799E-5	1203	7.97951507391481E-4
1204	3.65671136705714E-4	1204	8.33266167399316E-5
1205	1.57917573154087E-4	1205	-2.61298273912303E-4
1206	-9.98359903965351E-5	1206	0.00159407683543389
1207	-3.77589553947288E-4	1207	0.00281945194478173
1208	-8.94600617867169E-4	1208	0.00277610164158659
1209	-4.06216822819161E-5	1209	0.00320445078833487
1210	1.73357253304474E-4	1210	0.00230279993508287
1211	5.17336188891271E-4	1211	0.00154114908183089
1212	5.11315124477107E-4	1212	0.00113949822857862
1213	7.45294060064516E-4	1213	0.00122784737532644
1214	-7.27004350054017E-7	1214	0.00155619652207495
1215	-2.15127158289086E-4	1215	0.0015372478577218
1216	4.80667197026996E-4	1216	5.68623456038253E-4
1217	9.06461552344418E-4	1217	4.89999054352985E-4
1218	7.12255907662218E-4	1218	1.31374652669436E-4
1219	8.98050262978956E-4	1219	-4.47249749015555E-4
1220	1.53844618296262E-4	1220	2.54125849300735E-4
1221	-1.49682836717346E-4	1221	0.00117659885410148
1222	-3.71989550324692E-4	1222	7.51047190578724E-4
1223	-6.94296263931804E-4	1223	8.55495527056327E-4
1224	-8.86602977540285E-4	1224	0.00144994386353403
1225	-3.5890969114849E-4	1225	0.00243439220001118
1226	-5.11216404755821E-4	1226	0.0016288405364886
1227	-3.03523118363458E-4	1227	0.00186328887296572
1228	-5.64188413973099E-4	1228	0.00203021917549417
1229	-0.00133449687958276	1229	0.00140768903586075
1230	-0.00133480534519315	1230	0.0010651588962256
1231	-0.00110511381080247	1231	0.00112262875659219
1232	-0.00141542227641267	1232	-3.7990138304167E-4
1233	-7.85730742022928E-4	1233	-0.0013824315226767
1234	3.5457475721401E-4	1234	-7.44162725469621E-4
1235	1.26415168570482E-4	1235	-3.73896586161493E-4
1236	-4.4174442007261E-4	1236	9.06369553146824E-4
1237	3.10095991283177E-4	1237	0.00157663569245425
1238	0.0015719364026392	1238	0.00191690183176263
1239	0.00258377681399491	1239	0.00115716797107002
1240	0.00240561722535038	1240	8.74341103784815E-5
1241	0.00188919112355901	1241	-9.00422180494687E-4
1242	0.0010333428507181	1242	3.02347385237489E-4
1243	4.97494577876623E-4	1243	0.00163511695096918
1244	-7.18353694964868E-4	1244	0.00211788651670197
1245	-3.04201967806783E-4	1245	0.00161065608243405
1246	-4.80050240647678E-4	1246	5.43425648166895E-4
1247	-1.55382395607084E-4	1247	4.96646747614626E-4
1248	-1.9882211833E-4	1248	-1.28476529312138E-4
1249	1.77381589461234E-5	1249	-7.43599806240169E-4
1250	-4.57015637769231E-5	1250	7.1276916833618E-5
1251	8.50858713499214E-4	1251	0.00202615363990599
1252	7.27418990776663E-4	1252	0.00130103036297857
1253	7.73979268053004E-4	1253	-3.640929139479E-4
1254	8.22300902134643E-5	1254	-9.1811409928777E-4
1255	1.12816967936524E-5	1255	-0.00110161324124292
1256	3.33303372457294E-7	1256	-0.00224511238319902
1257	3.79384909952485E-4	1257	-0.0013586115251556
1258	4.08436516531552E-4	1258	1.5788933288885E-4
1259	0.00161748812311124	1259	0.00121439019093295
1260	0.001326903557473	1260	7.31055913500533E-4
1261	0.001098501958535	1261	0.00159871082320873
1262	2.50100359596495E-4	1262	0.00121636573291539
1263	-2.98301239342713E-4	1263	0.00138402064262344
1264	-0.00128670283828125	1264	4.11675552331126E-4
1265	-9.75104437220153E-4	1265	2.89330462039494E-4
1266	-3.23506036159493E-4	1266	1.76985371747485E-4
1267	0.00112965231323603	1267	5.25027091861752E-4
1268	0.00122382004096533	1268	3.33319101063267E-4
1269	0.00186798776869512	1269	0.00101161111026471
1270	0.00247215549642466	1270	5.99903119466561E-4
1271	0.00263632322415397	1271	-0.00121180487133188
1272	0.00169049095188267	1272	-0.00239351286213019
1273	9.54840291206516E-4	1273	-0.00372521463178099
1274	5.15505812517247E-5	1274	-0.00355683552651609
1275	-2.01739128702805E-4	1275	-0.00240845642125098
1276	-0.00144502883865805	1276	-0.00124007731598486
1277	-0.00132831854861326	1277	-6.1169821072049E-4
1278	0.00127839174143141	1278	9.26680894544951E-4
1279	0.00386510203147683	1279	7.85059999810045E-4
1280	0.00568311465927263	1280	-3.56713634271699E-4
1281	0.00680225597978534	1281	-0.00113861964245388
1282	0.00646139730029738	1282	-8.60525650636212E-4
1283	0.0047805386208104	1283	-0.00231243165881789
1284	0.00293967994132149	1284	-0.00282433766700141
1285	6.08821261834258E-4	1285	-0.00294624367518281
1286	-6.22037417653765E-4	1286	-0.00154814968336581
1287	-4.07794953307672E-5	1287	-0.00229055275303125
1288	1.80478426993425E-4	1288	-2.72955822696375E-4
1289	-1.9826365068365E-4	1289	-9.53588923611193E-5
1290	-0.00116700572836059	1290	-1.7761962026519E-5
1291	-0.00189574780603685	1291	-0.00100016503169176
1292	-0.00165448988371342	1292	-0.00120256810135722
1293	-0.00294244061876636	1293	-0.00167520896882678
1294	-0.00325947826617412	1294	-1.28124218377046E-4
1295	-0.00301651591358265	1295	1.28960532072675E-4
1296	-0.00280355356099182	1296	-1.03954717478594E-4
1297	-0.00416059120839929	1297	-1.68699670295425E-5
1298	-0.00391762885580871	1298	-6.79785216579631E-4
1299	-0.00375466650321687	1299	-0.00269270046613102
1300	-0.0034103720570684	1300	-0.00261601757252539
1301	-0.00293597514218469	1301	-0.00318936559098404
1302	-0.00102157822730131	1302	-0.0026727136094431
1303	1.42818687582924E-4	1303	-0.00262606162790213
1304	0.00160721560246557	1304	-0.0015094096463617
1305	0.00229161251735022	1305	-0.00115275766482092
1306	0.00116651110672716	1306	-0.00155623527972359
1307	-0.00150781498877084	1307	-0.00569991318003993
1308	-0.00388214108426865	1308	-0.0123535910803563
1309	-0.00693646717976559	1309	-0.0207672689806726
1310	-0.0102407932752637	1310	-0.0321409468809888
1311	-0.0120851193707612	1311	-0.0426046247813048
1312	-0.0163694454662586	1312	-0.0495983026816216
1313	-0.020492804924535	1313	-0.0512121738436715
1314	-0.023966003276608	1314	-0.0502960772160108
1315	-0.0257592016286816	1315	-0.0455799805883501
1316	-0.0264523999807542	1316	-0.0382138839606894
1317	-0.0248055983328266	1317	-0.031027787333028
1318	-0.0219287966848993	1318	-0.0243816907053676
1319	-0.020151680520005	1319	-0.0189856329905531
1320	-0.0188039003748486	1320	-0.0143096574250805
1321	-0.0162961202296907	1321	-0.0125336818596073
1322	-0.0139383400845343	1322	-0.0103677062941347
1323	-0.0126505599393774	1323	-0.0116917307286624
1324	-0.0103427797942199	1324	-0.0122857551631883
1325	-0.00806499964906315	1325	-0.0111997795977157
1326	-0.00718656794951933	1326	-0.00898381711623575
1327	-0.00627795855332725	1327	-0.00714785820311636
1328	-0.00576934915713334	1328	-0.00373189928999729
1329	-0.00584073976093968	1329	-0.0014059403768778
1330	-0.00537213036474693	1330	-3.59981463757819E-4
1331	-0.00602352096855352	1331	7.05977449361406E-4
1332	-0.00663474157114941	1332	8.21958301850501E-4
1333	-0.00637545217011493	1333	6.08004972451504E-4
1334	-0.00522616276908039	1334	2.64051643052099E-4
1335	-0.00502687336804541	1335	9.00983136524758E-5
1336	-0.00391758396701114	1336	-0.00148385501574655
1337	-0.0023982945659764	1337	-0.00270780834514461
1338	-0.0018690051649406	1338	-0.00309176167454428
1339	-0.00213933665058708	1339	-0.00349557774157461
1340	-0.00180951649090488	1340	-0.00256933890365829
1341	-0.0021596963312227	1341	-6.23100065741511E-4
1342	-0.00275987617154172	1342	1.31387721751253E-5
1343	-0.00275005601185985	1343	7.59377610092038E-4
1344	-0.00167023585217763	1344	0.00171561644800899
1345	-7.30347565271572E-4	1345	6.5190824613115E-4
1346	1.39854106862458E-4	1346	-7.15563388000717E-5
1347	0.00117005577899754	1347	-5.50209237326627E-5
1348	0.00124025745113254	1348	-3.84855086643654E-5
1349	1.50459123267055E-4	1349	-5.11950093597058E-4
1350	-8.39339204597778E-4	1350	-8.54146785291832E-5
1351	-0.00124913753246325	1351	5.71120736538866E-4
1352	-0.00187878654630502	1352	0.00146791392895462
1353	-0.00139835260791177	1353	0.00149485033100838
1354	-4.87918669518805E-4	1354	0.00176178673306016
1355	-4.74847311258131E-5	1355	0.00154872313511412
1356	1.42949207267762E-4	1356	9.85659537167116E-4
1357	3.83383145660332E-4	1357	8.52595939220713E-4
1358	-4.96174020939932E-4	1358	-3.40413509006154E-4
1359	-0.00176565706248155	1359	4.57028290434813E-4
1360	-0.0029451401040248	1360	7.9447008987632E-4
1361	-0.00311462314556721	1361	5.71911889317711E-4
1362	-0.00255410618710972	1362	-7.00646311241115E-4
1363	-0.00144358922865173	1363	1.56795488199357E-4
1364	-0.00108307227019466	1364	-5.45762712358844E-4
1365	-3.62593155240454E-4	1365	-2.37972909162387E-4
1366	-4.12142422912432E-4	1366	7.00077896851781E-4
1367	-0.00160169169058566	1367	0.00235812870286445
1368	-0.00190124095825883	1368	0.00203617950887836
1369	-0.00184079022593231	1369	0.00132423031489104
1370	-7.3033949360557E-4	1370	-1.57718879095547E-4
1371	-1.49896456718146E-4	1371	-9.39644347926816E-4
1372	5.30338803284458E-4	1372	-0.00162092923755441
1373	0.00132057406328645	1373	-0.00109221412718075
1374	0.00192080932328942	1374	2.46500983191567E-4
1375	0.00105104458329297	1375	0.00192521609356433
1376	7.71279843294614E-4	1376	0.00275393120393819
1377	8.21515103297088E-4	1377	0.0028826463143119
1378	6.71568004040779E-4	1378	0.0025516843457698
1379	3.91438545523926E-4	1379	0.00170104529831505
1380	-1.68690912992098E-4	1380	0.0013904062508594
1381	1.21179628491674E-4	1381	0.0011097672034035
1382	-3.58949830023825E-4	1382	0.00108912815594753
1383	-0.00126907928853992	1383	8.18489108492138E-4
1384	-0.00122920874705734	1384	0.0012578500610374
1385	-1.6983381440383E-4	1385	7.37628639439158E-4
1386	-3.10477237633222E-4	1386	-1.62577314533507E-4
1387	4.68879339137196E-4	1387	-0.00152278326850652
1388	0.00139823591590815	1388	-0.00173298922248044
1389	7.47592492678528E-4	1389	-0.00154319517645352
1390	3.2694906944819E-4	1390	-8.63401130425601E-4
1391	5.76021409527172E-4	1391	4.36455243982614E-4
1392	-1.65285232648138E-4	1392	0.0018263947229018
1393	-7.86591874824438E-4	1393	0.0024163342018193
1394	-2.37898516998847E-4	1394	0.00120627368073745
1395	8.50794840824953E-4	1395	5.16213159656331E-4
1396	8.39488198648652E-4	1396	-5.53847361425497E-4
1397	0.00102818155647277	1397	-8.43907882506656E-4
1398	5.56143558283928E-4	1398	-8.24107017883158E-4
1399	0.00127401779737379	1399	6.75677213025416E-4
1400	8.51892036463298E-4	1400	0.00117546144393277
1401	2.29766275552379E-4	1401	4.25245674841257E-4
1402	-3.32359485359035E-4	1402	6.25029905749308E-4
1403	-2.34485246269678E-4	1403	7.34814136657214E-4
1404	-8.76969297410213E-4	1404	-5.25580959686245E-4
1405	-0.0013600982709665	1405	-0.00111629884508169
1406	-0.00162322724452313	1406	-3.70167304781788E-5
1407	-8.46356218079158E-4	1407	-7.73461587399993E-6
1408	-0.00119948519163504	1408	-4.78452501269544E-4
1409	-0.00129261416519189	1409	-2.69170386665962E-4
1410	-0.00147574313874799	1410	-0.0011698882720621
1411	-9.39816997987286E-4	1411	-0.00199129455472491
1412	-0.00163409626715705	1412	-0.00265285048896757
1413	-0.00190837553632761	1413	-0.00288440642321053
1414	-0.00183265480549899	1414	-0.00175596235745257
1415	-0.00153693407466893	1415	-1.57518291694636E-4
1416	-0.00112121334383897	1416	0.00106092577406169
1417	-3.45835357923541E-4	1417	0.00144907270721895
1418	1.88685765706076E-4	1418	0.00177647680887194
1419	5.32068893344118E-5	1419	7.8388091052517E-4
1420	-3.12271987035651E-4	1420	-1.48714987821208E-4
1421	-0.00106775086340694	1421	-0.00140131088616702
1422	-0.00116322973977745	1422	-0.00155390678451361
1423	-5.38708616147687E-4	1423	-0.00192650268285988
1424	-3.75073138757287E-4	1424	-0.0022899852801137
1425	-1.21732876778857E-4	1425	-0.00304376344366819
1426	3.21607385198597E-4	1426	-0.00392754160722308
1427	1.5494764717694E-4	1427	-0.00446131977077879
1428	-1.61712090844368E-4	1428	-0.00399509793433417
1429	-2.08371828867016E-4	1429	-0.0035588760978893
1430	-0.00103527387504698	1430	-0.00254288208441178
1431	-0.00105306438447528	1431	2.32276578181256E-4
1432	-8.50854893903907E-4	1432	0.00143743524077422
1433	-4.38645403331606E-4	1433	6.92593903367289E-4
1434	-2.66435912759988E-4	1434	-1.12247434040036E-4
1435	3.15773577812095E-4	1435	3.8291122855405E-4
1436	-6.5201693161665E-4	1436	-1.51930108852838E-4
1437	-8.10518862961906E-4	1437	-5.7248071970939E-5
1438	-0.00100935778363631	1438	0.00123720819483797
1439	-8.81967043113718E-5	1439	0.00220166446164694
1440	1.72964375014573E-4	1440	0.00148612072845467
1441	6.54125454340182E-4	1441	0.001150576995264
1442	1.95286533664962E-4	1442	6.65033262072789E-4
1443	-3.83686349977097E-4	1443	8.94321925137831E-5
1444	-0.00104346301142488	1444	-7.26512895244724E-4
1445	-3.2396728730788E-6	1445	-1.82457983003204E-4
1446	2.06983665678173E-4	1446	-5.08403070761609E-4
1447	0.00140720700422925	1447	1.05651841479926E-4
1448	0.00198743034278159	1448	4.89706753721286E-4
1449	0.00123765368133366	1449	0.00186376166596336
1450	8.87372836272604E-4	1450	0.00118772002667367
1451	6.06765754755934E-4	1451	8.71615912864776E-4
1452	-5.93841326759659E-4	1452	3.25511799055711E-4
1453	4.15551591723684E-4	1453	-0.00132059231475345
1454	0.00329494451020729	1454	-0.00273669642856245
1455	0.00545433742869061	1455	-5.92800542371208E-4
1456	0.0087236771451602	1456	4.51101136533794E-4
1457	0.00899232523544047	1457	-0.0033449218792736
1458	0.00751097332572037	1458	-0.00768094489508009
1459	0.00270962141600073	1459	-0.0144269679108868
1460	-0.00287173049371958	1460	-0.0252129909266934
1461	-0.00859308240343903	1461	-0.0378390139425013
1462	-0.0125144343131591	1462	-0.0454950369583074
1463	-0.0170661408019388	1463	-0.0492508882836287
1464	-0.0183881545925688	1464	-0.0494865908105293
1465	-0.0193701683831984	1465	-0.0469522933374282
1466	-0.0199821821738286	1466	-0.0396379958643278
1467	-0.0188341959644589	1467	-0.0318836983912281
1468	-0.0166462097550895	1468	-0.0258294009181279
1469	-0.0155082235457193	1469	-0.0204551034450278
1470	-0.0138708162699661	1470	-0.015920246092116
1471	-0.0120634089942131	1471	-0.0130453887392044
1472	-0.0107060017184608	1472	-0.0102905313862918
1473	-0.00983859444270774	1473	-0.00748567403338019
1474	-0.00834118716695542	1474	-0.00755081668046831
1475	-0.00801377989120233	1475	-0.00707595932755556
1476	-0.00704660289481396	1476	-0.00663073088466781
1477	-0.00631969160538404	1477	-0.00705507426103935
1478	-0.00575278031595516	1478	-0.00824941763741105
1479	-0.00558586902652536	1479	-0.00639376101378186
1480	-0.00554895773709596	1480	-0.0053481043901531
1481	-0.0052920464476669	1481	-0.00449244776652336
1482	-0.00507513515823721	1482	-0.00293679114289436
1483	-0.00439860740505083	1483	-0.00102017004776034
1484	-0.00461210915465138	1484	-2.2347476250939E-4
1485	-0.00271561090425276	1485	3.63220522740626E-4
1486	-0.00222911265385406	1486	8.89915807992914E-4
1487	-0.0015826144034552	1487	0.00111661109324324
1488	-0.0018961161530564	1488	0.0015533063784936
1489	-9.29747581553286E-4	1489	0.00198050375580827
1490	-0.00135357942289183	1490	0.00211847709358626
1491	-0.00182741126423025	1491	0.00261645043136394
1492	-0.00186124310556757	1492	0.00299442376914083
1493	-0.00137507494690592	1493	0.002262397106918
1494	-0.00103890678824392	1494	5.10370444695596E-4
1495	-5.52738629581384E-4	1495	4.3834378247265E-4
1496	-5.16782309014197E-4	1496	2.4761778604887E-4
1497	-4.60861294795833E-4	1497	-4.82891432741717E-4
1498	4.45059719421437E-4	1498	5.26599348467549E-4
1499	9.90980733639901E-4	1499	0.00182609012967649
1500	7.16901747859211E-4	1500	0.0025555809108857
1501	0.00105282276207763	1501	0.00340507169209481
1502	0.00129869099864077	1502	0.00243512717005512
1503	0.0013844478157079	1503	0.00212637478560129
1504	7.70204632775773E-4	1504	0.0022576224011468
1505	-1.64038550155787E-4	1505	0.00179887001669243
1506	-2.88281733087814E-4	1506	9.70117632237866E-4
1507	-0.00131252491601952	1507	0.0018613652477848
1508	-0.00194676809895178	1508	0.00123261286333065
1509	-0.00245107512105758	1509	6.1542868003972E-4
1510	-7.853995538456E-4	1510	1.78672187975515E-4
1511	3.40276013364615E-4	1511	-9.80843040894186E-5
1512	0.00181595158057668	1512	4.51592038466231E-5
1513	0.00145162714778735	1513	0.00170840271178196
1514	0.00221730271499876	1514	0.00333164621971793
1515	0.00113297870656837	1515	0.00417543333068959
1516	6.86559712157475E-5	1516	0.00470085125077091
1517	-7.25666764136434E-4	1517	0.00448626917085182
1518	-7.29989499490102E-4	1518	0.00356168709093296
1519	-0.00148431223484291	1519	0.00252710501101383
1520	-7.88634970195545E-4	1520	0.00153252293109496
1521	-5.62957705548151E-4	1521	4.77940851176584E-4
1522	-1.97219980378804E-4	1522	5.44807267256253E-4
1523	3.4854192899747E-4	1523	-0.0010977469182647
1524	7.44303838374982E-4	1524	-0.0011803011037852
1525	-1.29934252248276E-4	1525	-7.62855289305975E-4
1526	-6.84172342871214E-4	1526	5.45905251732037E-5
1527	-1.98410433494445E-4	1527	-5.79636603479372E-5
1528	-1.26185969708814E-5	1528	0.00131978684259959
1529	-1.76689095570559E-4	1529	0.00178893891249743
1530	8.69240405829252E-4	1530	0.00175809098239554
1531	0.0013851699072287	1531	0.00118724305229367
1532	8.81099408628572E-4	1532	0.00166639512219202
1533	5.70289100281229E-5	1533	0.00112554719209079
1534	1.52958411427484E-4	1534	0.00154469926198875
1535	-4.20951043891726E-4	1535	0.00265467278300147
1536	-1.94771030721519E-4	1536	0.00308510266574569
1537	-3.38591017550627E-4	1537	0.00252553254848831
1538	2.9758899561827E-4	1538	0.00218596243123237
1539	5.13769008788856E-4	1539	3.06392313976112E-4
1540	5.99949021959034E-4	1540	-0.00137317780328061
1541	0.00160616350078691	1541	-0.00157268050060022
1542	0.00244266519343395	1542	-9.61621365118681E-4
1543	0.00219916688608102	1543	-5.05622296360642E-5
1544	0.00230566857872905	1544	5.90496905845228E-4
1545	0.00192217027137609	1545	4.91556041327001E-4
1546	5.18671964022666E-4	1546	6.02615176809707E-4
1547	-7.94826343329724E-4	1547	-0.00111632568770847
1548	-6.1814240720004E-4	1548	-0.00263529726648315
1549	-0.00173132178845758	1549	-0.00249429188095007
1550	-0.00115450116971516	1550	-0.00209328649541618
1551	2.8231944902668E-4	1551	-0.00224228110988278
1552	0.00200914006776909	1552	-0.00114127572434963
1553	0.00236596068651185	1553	-0.00100027033881744
1554	0.00333279084416471	1554	-0.00182928555661821
1555	0.00362987855238384	1555	-0.00195885706443821
1556	0.00300696626060404	1556	-0.0029884285722579
1557	9.74053968822552E-4	1557	-0.00319800008007665
1558	-1.38858322957347E-4	1558	-0.00266757158789677
1559	-6.11770614736606E-4	1559	-0.00157714309571588
1560	-1.84682906517963E-4	1560	-0.00266671460353507
1561	-2.57537035420974E-4	1561	-0.00198669084842873
1562	5.5966699855059E-4	1562	-0.00200707183039661
1563	0.00126687103252188	1563	-0.00130745281236422
1564	9.44075066493966E-4	1564	-7.47833794331854E-4
1565	-1.48720899534105E-4	1565	4.31785223700132E-4
1566	-0.00119151686556229	1566	0.00107140424173302
1567	-0.00142431283159095	1567	0.00180102325976517
1568	-0.00189717874293649	1568	0.00182985861322837
1569	-8.20047244848077E-4	1569	0.00105866494207962
1570	-3.92915746760814E-4	1570	0.00150747127092909
1571	-3.95784248673259E-4	1571	0.00146627759978024
1572	-8.86527505858936E-5	1572	0.00175508392862955
1573	2.48478747501224E-4	1573	7.73890257480758E-4
1574	-2.74487289685155E-4	1574	-9.76835139283594E-5
1575	-6.87583373903955E-4	1575	-0.00125976408568285
1576	3.49320541877418E-4	1576	-0.00194184465743685
1577	3.96224457658079E-4	1577	-0.00287392522919028
1578	-1.96871626560124E-4	1578	-0.0015560058009445
1579	-0.00125996771077919	1579	-2.98086372698236E-4
1580	-8.33063794997813E-4	1580	1.49833055548498E-4
1581	-0.00135647558919771	1581	2.06883154414861E-4
1582	-0.00186992526859431	1582	0.00133382893375611
1583	-0.00156337494799175	1583	0.00144077471309778
1584	-8.66824627388851E-4	1584	0.00124772049243926
1585	-7.20274306785562E-4	1585	0.00125466627178206
1586	-4.93723986182637E-4	1586	0.00124161205112383
1587	-3.87323821369634E-4	1587	-9.18150795854444E-5
1588	-7.11939369777426E-5	1588	-0.00160591344838323
1589	-4.15064052584846E-4	1589	-0.00243001181718228
1590	-0.00146893416819349	1590	-0.00310411018598078
1591	-0.00191280428380036	1591	-0.00325820855478032
1592	-0.00121667439940865	1592	-0.00276230692357782
1593	-8.00544515016099E-4	1593	-0.00199640529237666
1594	-8.47613206191866E-5	1594	-0.0019913586169924
1595	6.09465063883263E-5	1595	-0.00100649780156647
1596	6.46654333394281E-4	1596	-0.00143163698614135
1597	3.22362160401823E-4	1597	-0.00189677617071649
1598	7.08069987408244E-4	1598	-0.00227191535529148
1599	2.03777814415496E-4	1599	-0.00384705453986633
1600	3.29374257098891E-4	1600	-0.00481241573563729
1601	-4.05307761023543E-4	1601	-0.00479833195939872
1602	-1.0998977914678E-4	1602	-0.0041942481831585
1603	4.55328202730421E-4	1603	-0.00476016440691929
1604	0.00180064618460651	1604	-0.00297608063068022
1605	0.00259596416648478	1605	-3.31996854441741E-4
1606	0.00487128214836119	1606	7.42086921798446E-4
1607	0.00631632732372012	1607	-0.00202413749877195
1608	0.00619128156357363	1608	-0.00658046465161188
1609	0.00532623580342584	1609	-0.0135067918044518
1610	0.00271119004327769	1610	-0.0249231189572923
1611	-0.00189385571686973	1611	-0.0367794461101321
1612	-0.00739890147701683	1612	-0.0450957732629718
1613	-0.0127040197578232	1613	-0.0481121088885557
1614	-0.0170594039477141	1614	-0.0473084755808664
1615	-0.0201947881376068	1615	-0.0429548422731774
1616	-0.0223201723274986	1616	-0.0351812089654882
1617	-0.0234655565173902	1617	-0.0277075756578
1618	-0.0234009407072824	1618	-0.0223439423501102
1619	-0.0218463248971741	1619	-0.0179103090424215
1620	-0.019061921559631	1620	-0.0146764505507111
1621	-0.017277618866987	1621	-0.0123224853928843
1622	-0.0155033161743434	1622	-0.0100585202350576
1623	-0.0139790134816993	1623	-0.00760455507723101
1624	-0.0121647107890555	1624	-0.00604058991940448
1625	-0.0108204080964134	1625	-0.00415662476157763
1626	-0.00898614651879548	1626	-0.00302255914093141
1627	-0.00738213163133672	1627	-0.00178789074335928
1628	-0.00612811674387803	1628	-4.83222345787127E-4
1629	-0.00575410185641889	1629	1.44605178498125E-6
1630	-0.00600008696896026	1630	6.76114449357001E-4
1631	-0.0059860720815017	1631	8.00782846929415E-4
1632	-0.00545205719404329	1632	4.95451244502121E-4
1633	-0.0042882016772765	1633	-3.89227904389777E-4
1634	-0.0045144492827216	1634	-1.13484877463321E-4
1635	-0.00394069688816767	1635	7.92258149462377E-4
1636	-0.00316694449361332	1636	0.00261800117638877
1637	-0.00280319209905855	1637	0.00240374420331602
1638	-0.00299943970450478	1638	0.00228948723024125
1639	-0.00259570425142375	1639	0.00333533354423654
1640	-0.00231218903749486	1640	0.00310252259012511
1641	-0.00228867382356501	1641	0.00228971163601344
1642	-0.0016751586096353	1642	0.00307690068190247
1643	-7.16433957066442E-5	1643	0.00387408972779024
1644	3.71871818222402E-4	1644	0.00159127877367915
1645	0.00122538703215191	1645	5.68467819568319E-4
1646	0.00124878874518242	1646	5.76630477190143E-4
1647	6.12092090766403E-4	1647	0.00115563693165033
1648	-0.00152460456364967	1648	0.00127464338610928
1649	-0.00179130121806459	1649	0.00255364984056961
1650	-0.00215799787248017	1650	0.00284265629502833
1651	-0.00108469452689608	1651	0.00218166274948928
1652	-9.11391181311672E-4	1652	0.00169066920394823
1653	-8.98274391792242E-4	1653	0.00166186445658756
1654	-3.05157602272566E-4	1654	0.00212305970922522
1655	1.37959187247461E-4	1655	0.00123425496186513
1656	-2.08924023233692E-4	1656	0.00102545021450418
1657	1.74192766285941E-4	1657	2.96645467142476E-4
1658	3.273095558054E-4	1658	5.87840719781241E-4
1659	-3.69648517861698E-4	1659	6.80222769684491E-4
1660	-7.36692972127528E-4	1660	0.00145397420104665
1661	-0.00135373742639189	1661	8.97725632409418E-4
1662	-0.00117078188065811	1662	0.00153147706377155
1663	3.4217366507594E-4	1663	9.75228495133429E-4
1664	0.00104512921081046	1664	5.38979926495209E-4
1665	6.28084756543856E-4	1665	3.12731357857921E-4
1666	9.50914080166676E-4	1666	0.00128913717612722
1667	0.00110373369439554	1667	0.00160574717800532
1668	-1.33446691374495E-4	1668	0.00154235717988271
1669	-5.5062707714626E-4	1669	0.00132896718175957
1670	4.22192537082644E-4	1670	0.00250557718363709
1671	5.25012151312509E-4	1671	0.00204218718551452
1672	5.87788307989001E-4	1672	9.89974593258225E-4
1673	8.50497302992359E-4	1673	0.00115958162824992
1674	6.13206297995994E-4	1674	0.00211918866324101
1675	-1.64084706999468E-4	1675	0.00221879569823269
1676	-2.1375711996896E-5	1676	0.00413840273322386
1677	-2.98666716992635E-4	1677	0.00560800976821518
1678	-1.25957721988534E-4	1678	0.00562761680320722
1679	7.16678115455061E-4	1679	0.00439965240368601
1680	2.89301759973881E-4	1680	0.00275209276508015
1681	2.91925404491522E-4	1681	0.0011745331264752
1682	3.04549049009673E-4	1682	4.76973487869792E-4
1683	1.17172693526513E-4	1683	7.3941384926357E-4
1684	-7.30203661954754E-4	1684	0.00193185421065856
1685	-1.57599340987247E-4	1685	0.00294501368839661
1686	2.5496418582005E-4	1686	0.00309969130063781
1687	-1.42472287372186E-4	1687	0.00313436891287999
1688	4.00912394349362E-5	1688	0.00246904652512114
1689	9.12654766241694E-4	1689	0.00148372413736197
1690	0.00100521829304956	1690	0.00101840174960355
1691	0.0010777818198564	1691	8.30793618451509E-5
1692	0.00161031035504511	1692	-7.81191001570924E-4
1693	0.00124282934706432	1693	-0.00112517444925597
1694	-3.46516609157632E-5	1694	-8.79157896941152E-4
1695	-2.52132668896898E-4	1695	2.56858655373726E-4
1696	-0.00113961367687665	1696	0.00134287520768783
1697	-8.97094684857436E-4	1697	0.00230889176000204
1698	-3.24591024768672E-4	1698	0.00277498782808472
1699	-6.5213336047254E-4	1699	9.41322443466674E-4
1700	-7.49675696175345E-4	1700	-0.00125234294115018
1701	-4.27218031878951E-4	1701	-0.0016660083257678
1702	-0.00185476036758203	1702	-0.00174967371038459
1703	-0.0030923027032852	1703	-0.00117333909500239
1704	-0.00161984503898882	1704	1.02995520380844E-4
1705	-0.0012374111630713	1705	0.00107879914920073
1706	-0.00183498680250516	1706	5.43903833944981E-5
1707	-0.00131256244193878	1707	-4.60018382409721E-4
1708	-1.30138081372522E-4	1708	-9.14427148214436E-4
1709	-2.17713720807033E-4	1709	-7.38835914019909E-4
1710	-2.55289360240774E-4	1710	5.26755320175099E-4
1711	7.37149933001113E-4	1711	0.00100203099020568
1712	0.0011596579165527	1712	4.55855065079724E-4
1713	5.72165900102561E-4	1713	-5.30320860045563E-4
1714	6.34673883653569E-4	1714	-8.9649678517123E-4
1715	5.17181867204286E-4	1715	-0.00266267271029719
1716	5.09689850755279E-4	1716	-0.00268884863542329
1717	3.72197834305865E-4	1717	-0.00230502456054893
1718	7.5483494354156E-4	1718	-0.00192295085432992
1719	-6.24562107311988E-5	1719	-0.00145184957514299
1720	6.02526349959831E-5	1720	-4.30748295953798E-4
1721	-4.47038519276965E-4	1721	0.00142035298323329
1722	1.5567032644892E-4	1722	0.00100145426242193
1723	7.78379172175825E-4	1723	8.42555541609613E-4
1724	0.00223111845631419	1724	-2.86720672726837E-4
1725	0.0016541113938775	1725	-0.0021691426664292
1726	0.0011271043314407	1726	-0.00518156466013231
1727	0.00105009726900374	1727	-0.00709398665383354
1728	8.03090206566104E-4	1728	-0.00742640864753685
1729	-5.83916855870115E-4	1729	-0.00814883064123961
1730	-4.50923918307033E-4	1730	-0.00671125263494154
1731	6.22504660814371E-5	1731	-0.00479595161697866
1732	-0.00146443906441007	1732	-0.00154235834026384
1733	-0.002581128594902	1733	-2.58765063550825E-4
1734	-0.00189781812539369	1734	0.00242482821316337
1735	-5.14507655886121E-4	1735	0.00244842148987701
1736	-5.71197186378214E-4	1736	0.00168201476659036
1737	5.02126464480668E-4	1737	0.00147546561494405
1738	0.00137580601180343	1738	0.00125507089757271
1739	0.00170948555912798	1739	2.84676180200449E-4
1740	2.73165106451145E-4	1740	0.00122428146282871
1741	-1.03155346224071E-4	1741	0.00114388674545651
1742	1.40524201099446E-4	1742	-2.66507971915964E-4
1743	-1.65796251575756E-4	1743	-0.00214690268928752
1744	-8.19025643483684E-5	1744	-0.00318931172199477
1745	0.00104220526278276	1745	-0.00438373507003753
1746	0.00225631308991314	1746	-0.0037981584180784
1747	0.00252042091704485	1747	-0.00325258176612131
1748	0.00248452874417637	1748	-7.47005114163812E-4
1749	0.00211863657130706	1749	-6.14284622058037E-5
1750	0.00217274439843873	1750	-0.00112585181024727
1751	0.00178726784284766	1751	-0.001824028429664
1752	0.00131180668048803	1752	-0.00186234405912966
1753	0.00287634551813021	1753	-0.00334065968859498
1754	0.00439088435577162	1754	-0.00380897531806212
1755	0.00530542319341265	1755	-0.00224729094752796
1756	0.0062899620310537	1756	-0.00215560657699321
1757	0.00768466692712177	1757	-0.00493547679085005
1758	0.00737959323442539	1758	-0.00992741978389322
1759	0.00527451954172875	1759	-0.0162093627769364
1760	0.00173944584903296	1760	-0.0256113057699796
1761	-0.00255562784366337	1761	-0.0362632487630234
1762	-0.00748070153635982	1762	-0.0435751917560676
1763	-0.0132957752290563	1763	-0.0461871347491112
1764	-0.0178105441898726	1764	-0.0459520766046353
1765	-0.0203252765828621	1765	-0.0436973783236576
1766	-0.0218700089758537	1766	-0.0371726800426808
1767	-0.0227647413688432	1767	-0.030487981761703
1768	-0.0214094737618336	1768	-0.0246932834807252
1769	-0.0191942061548245	1769	-0.021018585199748
1770	-0.0186088331443317	1770	-0.0169949905217646
1771	-0.0174332704075733	1771	-0.0136433823291693
1772	-0.0151377076708137	1772	-0.0108917741365726
1773	-0.0141821449340531	1773	-0.00876016594397822
1774	-0.0136665821972937	1774	-0.00530855775138317
1775	-0.0121810194605336	1775	-0.00242694955878697
1776	-0.0103854567237738	1776	-4.35341366191722E-4
1777	-0.00945968948432618	1777	9.03949206116472E-4
1778	-0.0077238777877735	1778	0.0013127359479288
1779	-0.00625806609121948	1779	0.00128152268974002
1780	-0.00453225439466554	1780	0.00193030943155215
1781	-0.0040364426981121	1781	0.00159909617336407
1782	-0.00384063100155796	1782	0.00260788291517589
1783	-0.00415476136505077	1783	0.0036059402817914
1784	-0.00415874687865969	1784	0.00419217421041651
1785	-0.00381273239226854	1785	0.0048284081390424
1786	-0.00348671790587662	1786	0.00553464206766741
1787	-0.00306070341948672	1787	0.00534087599629363
1788	-0.00208468893309544	1788	0.0055971099249188
1789	-0.00257867444670357	1789	0.00619334385354442
1790	-0.00327254249540143	1790	0.00630786465047883
1791	-0.00293637138912928	1791	0.00670181440351669
1792	-0.00166020028285629	1792	0.00648576415655366
1793	-0.00106402917658333	1793	0.00603971390959135
1794	4.22141929689701E-4	1794	0.00529366366262884
1795	5.98313035962583E-4	1795	0.00533761341566574
1796	5.94507810076195E-4	1796	0.00468113126770575
1797	4.07893662739411E-5	1797	0.00451306548275188
1798	-2.92907752807992E-6	1798	0.00416499969779949
1799	-3.86647521330552E-4	1799	0.00392693391284649
1800	4.39634034866465E-4	1800	0.00284886812789242
1801	5.35915591065361E-4	1801	0.00231080234294012
1802	5.72197147262976E-4	1802	0.00190273655798734
1803	2.9852232201133E-4	1803	0.00231348537633913
1804	2.94868158177586E-4	1804	0.00278367269099267
1805	4.31213994344759E-4	1805	0.00379386000564708
1806	4.37559830511525E-4	1806	0.00490404732030036
1807	-3.26094333320981E-4	1807	0.00531423463495528
1808	2.2025150284577E-4	1808	0.00441442194960917
1809	0.00105659992615781	1809	0.00369439808386396
1810	8.02963872336804E-4	1810	0.00351310713572417
1811	5.09327818516425E-4	1811	0.00434181618758345
1812	9.1569176469708E-4	1812	0.0066805252394424
1813	-3.79442891231818E-5	1813	0.00851923429130252
1814	-8.01580342943531E-4	1814	0.0105379433431612
1815	3.47836032368321E-5	1815	0.01285665239502
1816	4.31130513021571E-4	1816	0.0131546270315823
1817	4.7746639925883E-4	1817	0.0105621264582441
1818	7.83802285494239E-4	1818	0.00966962588490627
1819	1.00138171731601E-4	1819	0.00857712531156807
1820	-6.7352594203296E-4	1820	0.00635462473823001
1821	4.28099442038032E-5	1821	0.00461212416489243
1822	1.79140528303812E-4	1822	0.00524955637815516
1823	-5.4597815358548E-5	1823	0.00474611481721787
1824	1.31663840977403E-4	1824	0.00371267325628111
1825	3.79254973150722E-5	1825	0.00167923169534401
1826	-6.05812846347753E-4	1826	-3.84209865592844E-4
1827	-6.09551190010826E-4	1827	-0.00216765142652964
1828	-4.13289533674366E-4	1828	-0.00319109298746589
1829	-1.57092377260248E-4	1829	-0.00360489473590508
1830	2.9904887922072E-4	1830	-0.00240900864684335
1831	8.85190135702096E-4	1831	-0.00111312255778184
1832	8.31331392183721E-4	1832	6.62763531280142E-4
1833	6.37472648665316E-4	1833	0.00237864962034173
1834	6.43613905146445E-4	1834	0.0039545357094033
1835	4.69755161627283E-4	1835	0.00370042179846486
1836	-2.34269986751912E-4	1836	0.00463590417512183
1837	2.21704864870276E-4	1837	0.00347138655178014
1838	-5.82320283508686E-4	1838	0.00211686892843854
1839	-7.56345431887517E-4	1839	6.52351305095777E-4
1840	-0.00158037058026572	1840	-0.00177216631824617
1841	-0.00213439572864527	1841	-0.00359668394158863
1842	-0.00324850829083001	1842	-0.00341126427823291
1843	-0.00159272171509883	1843	-0.00257591697638038
1844	-0.00146693513936746	1844	-0.00151056967452856
1845	-0.00142114856363662	1845	0.00113477762732295
1846	-1.65361987905399E-4	1846	0.0027201249291755
1847	8.20424587825386E-4	1847	0.0030454722310278
1848	0.00107621116355539	1848	0.00239081953288078
1849	0.00130187932322379	1849	0.00161629085732429
1850	0.00148753837396143	1850	4.81771721969615E-4
1851	7.53197424700147E-4	1851	6.17252586613048E-4
1852	2.08856475439667E-4	1852	-8.72665487428037E-5
1853	-2.05484473822182E-4	1853	-1.21785684098263E-4
1854	-8.39825423082807E-4	1854	2.33695180545723E-4
1855	-3.84193630718954E-4	1855	5.39334063989649E-4
1856	2.41396035064234E-4	1856	-0.00127478284169147
1857	7.96985700847408E-4	1857	-0.00146889974737263
1858	-5.87424633368805E-4	1858	-0.00104301665305329
1859	-4.31834967584699E-4	1859	-0.00161713355873427
1860	-4.46245301802151E-4	1860	-0.00148125046441638
1861	-2.20655636017142E-4	1861	-0.00192536737009696
1862	-2.85081796944198E-4	1862	-0.00344887999623467
1863	6.20489404344227E-4	1863	-0.00393229190911359
1864	0.00136606060563427	1864	-0.00438570382199277
1865	0.00143163180692252	1865	-0.00437911573487249
1866	6.47203008211861E-4	1866	-0.00202252764775146
1867	2.12774209500388E-4	1867	0.00164406043936971
1868	-7.6164694668357E-4	1868	0.00254104373741271
1869	-0.00137605196864588	1869	0.00482886136962524
1870	-9.30456990607453E-4	1870	0.00654667900183803
1871	2.95137987429861E-4	1871	0.00539449663405023
1872	3.60732965469346E-4	1872	0.00281231426626327
1873	0.00129632794350698	1873	0.00117013189847537
1874	0.00135192292154507	1874	-3.7205046931188E-4
1875	1.47561788132577E-4	1875	-0.00126294310748953
1876	-5.66787375675837E-4	1876	-0.00104348400122944
1877	-8.61136539484164E-4	1877	1.75975105031867E-4
1878	-6.35485703292638E-4	1878	0.00160543421129233
1879	3.00165132898655E-4	1879	0.00276489331755325
1880	7.05815969090473E-4	1880	0.00298435242381423
1881	-9.48511865502155E-4	1881	0.00305426744303716
1882	-0.00158277571244891	1882	0.00147555020114609
1883	-0.00150703955939679	1883	1.36832959255706E-4
1884	-0.00148130340634367	1884	-0.00105188428263592
1885	-8.05567253291173E-4	1885	-0.00234060152452553
1886	0.00101016889976169	1886	-0.00300931876641641
1887	0.0017559050528142	1887	-0.0014280360083081
1888	9.51745129193604E-4	1888	-4.75395480477481E-4
1889	6.17626774904068E-4	1889	-2.12211844758947E-4
1890	4.33508420614181E-4	1890	3.20971790960023E-4
1891	9.9390066324645E-5	1891	8.0415542667911E-4
1892	7.55271712034045E-4	1892	5.3733906239728E-4
1893	0.00134115335774432	1893	0.00117052269811602
1894	8.57068236413738E-4	1894	0.00101406808073889
1895	0.00129313598669434	1895	7.39277499119062E-4
1896	9.99203736975041E-4	1896	0.00187448691750092
1897	-1.24728512743921E-4	1897	0.00241969633588113
1898	-6.28660762463262E-4	1898	0.00199490575426164
1899	-4.32593012182458E-4	1899	0.0014201151726434
1900	-0.00140652526190088	1900	4.85324591023684E-4
1901	-0.00149034138855875	1901	-0.00178815510144492
1902	-8.640930024022E-4	1902	-0.00388090652216455
1903	6.21553837536482E-5	1903	-0.0052536579428839
1904	9.58403769908855E-4	1904	-0.00673640936360265
1905	0.00186465215606457	1905	-0.00525916078432243
1906	0.00386090054222077	1906	-0.00431191220504168
1907	0.00502716684890903	1907	-0.00699445206017479
1908	0.00501358249337525	1908	-0.0130252288687593
1909	0.00401999813784037	1909	-0.0197360056773439
1910	0.00218641378230622	1910	-0.0290667824859279
1911	-0.00179717057322826	1911	-0.0387975592945127
1912	-0.00670075492876254	1912	-0.0454083361030975
1913	-0.0114943392842966	1913	-0.0477491129116814
1914	-0.0151278355572666	1914	-0.0463388000946487
1915	-0.0181912657683139	1915	-0.0438176700584014
1916	-0.0192046959793615	1916	-0.0379465400221548
1917	-0.0184181261904088	1917	-0.030085409985908
1918	-0.0179915564014559	1918	-0.0240842799496619
1919	-0.0170549866125036	1919	-0.0196031499134151
1920	-0.0157384117867414	1920	-0.0149919541958283
1921	-0.0161917009671244	1921	-0.012218985082054
1922	-0.0154449901475076	1922	-0.0103760159682782
1923	-0.0130682793278902	1923	-0.00764304685450412
1924	-0.0112915685082733	1924	-0.0055400777407284
1925	-0.00906485768865561	1925	-0.00433710862695413
1926	-0.00617814686903806	1926	-0.00289413951317918
1927	-0.00503137209100046	1927	-0.00237028474429213
1928	-0.00454453335454286	1928	-0.00272554432029182
1929	-0.00457769461808422	1929	-0.00291080389629172
1930	-0.00516085588162518	1930	-0.00310606347229214
1931	-0.00491401714516648	1931	-0.00239132304829148
1932	-0.0042471784087077	1932	-6.16582624291873E-4
1933	-0.00459033967225064	1933	4.68157799708102E-4
1934	-0.00344339023287965	1934	0.0016045409258103
1935	-0.00223643669340223	1935	0.00269098489273212
1936	-0.00207948315392414	1936	0.00136742885965369
1937	-0.00233252961444741	1937	-6.61271734250235E-5
1938	-0.00182557607496925	1938	4.50316793497052E-4
1939	-0.00154862253549126	1939	0.00104676076041788
1940	-0.0013016254149294	1940	0.00133390577403336
1941	-0.0010445701862567	1941	0.00246198551657351
1942	-0.00155751495758327	1942	0.00331006525911359
1943	-0.00117045972891017	1943	0.00396814500165288
1944	-0.00137340450023693	1944	0.00340622474419305
1945	-0.00135634927156314	1945	0.00357430448673224
1946	-0.00148929404288989	1946	0.0035523842292724
1947	-2.92159729061048E-4	1947	0.00414186397923633
1948	7.64984074985264E-4	1948	0.00373151173009134
1949	7.22127879033252E-4	1949	0.00338115948094675
1950	4.99271683079172E-4	1950	0.00297080723180176
1951	0.00105641548712665	1951	0.00324045498265679
1952	5.73559291172643E-4	1952	0.00329010273351127
1953	-3.59269954225638E-4	1953	0.00304028628472786
1954	-6.82050688627811E-4	1954	0.00380143427659529
1955	-3.5483142303061E-4	1955	0.00475258226846176
1956	-2.67612157433206E-4	1956	0.00546373026032931
1957	1.99607108164912E-4	1957	0.00524487825219566
1958	6.8263737622587E-6	1958	0.00549602624406287
1959	4.14045639359983E-4	1959	0.00603717423592975
1960	-2.78683880837072E-4	1960	0.00525949890262911
1961	-9.01402267512452E-4	1961	0.00359207936820471
1962	-4.04120654186713E-4	1962	0.00267465983378123
1963	-1.46839040861657E-4	1963	0.00112724029935674
1964	4.10442572462699E-4	1964	-4.60179235067137E-4
1965	9.47724185788701E-4	1965	1.92401230508565E-4
1966	5.95019865944124E-4	1966	0.00141537161220118
1967	-5.76492868251677E-5	1967	0.00243931678418186
1968	-1.80318439594096E-4	1968	0.00532326195616317
1969	-0.00107298759236407	1969	0.00689720712814523
1970	-0.00138565674513291	1970	0.00706115230012561
1971	-9.78325897902366E-4	1971	0.00628509747210781
1972	-6.20995050671702E-4	1972	0.00498904264408839
1973	2.16362886621191E-4	1973	0.0027639605203964
1974	7.1372985393392E-4	1974	3.69202631480547E-4
1975	3.21096821246591E-4	1975	-0.0017855552574364
1976	3.88463788558724E-4	1976	-0.00185031314635342
1977	2.45830755871701E-4	1977	-0.00161507103527025
1978	-1.68022768152198E-5	1978	-0.00142982892418697
1979	-3.94303795889783E-5	1979	-8.54323378298716E-4
1980	9.67959593983103E-4	1980	-2.27851904793575E-4
1981	0.00180534956755629	1981	9.86195687113778E-5
1982	0.00251273954112907	1982	4.65091042216592E-4
1983	0.00230012951470204	1983	-4.38437484278076E-4
1984	0.00140751948827411	1984	2.38033989226949E-4
1985	9.14909461847913E-4	1985	0.00143450546273183
1986	8.42305970320645E-4	1986	0.00146175385855418
1987	3.89705574272092E-4	1987	0.0017693702702104
1988	9.87105178224645E-4	1988	0.00294698668186744
1989	0.00116450478217711	1989	0.00323460309352264
1990	0.00145190438612985	1990	0.00234221950517899
1991	0.00116930399008197	1991	0.0013098359168362
1992	0.00134670030540551	1992	-1.22417401933639E-4
1993	8.54076888956889E-4	1993	-0.00209388910326069
1994	0.00107145347250803	1994	-0.00262536080458808
1995	2.58830056059978E-4	1995	-0.00327683250591626
1996	1.6620663961131E-4	1996	-0.00396830420724292
1997	-7.64167768370072E-5	1997	-0.00385977590857145
1998	5.00959806714718E-4	1998	-0.00232124760989816
1999	-8.31728584429925E-4	1999	-0.00173228481471988
2000	-6.94459018025562E-4	2000	-9.830408747451E-4
2001	-9.77189451621285E-4	2001	3.1620306523017E-4
2002	-0.00107991988521672	2002	0.00114544700520547
[truncated: 199 more rows]
