# Supplementary material for: Mutational phospho-mimicry reveals a regulatory role for the XRCC4 and XLF C-terminal tails in modulating DNA bridging during classical non-homologous end joining
Source: eLife journal article supplement (doi:10.7554/elife.22900), 2017-05-13
Supplement: supp [file elife-22900-supp-v1.zip › elife_poa_e22900_Figure_8_figure_supplement_1_source_data_1.txt.txt]

Time	X4_WT	Time	X4_Ala	Time	X4_Asp	Time	XLF_WT	Time	XLF_Ala	Time	XLF_Asp
s	RU	s	RU	s	RU	s	RU	s	RU	s	RU
-50.7	1.55859	-50.7	2.21875	-50.6	2.17657	-50.7	1.69452	-50.5	2.05859	-50.6	2.09766
-50.6	1.46875	-50.6	2.12891	-50.5	2.16486	-50.6	1.83514	-50.4	2.04688	-50.5	2.00781
-50.5	1.48828	-50.5	2.14844	-50.4	2.18439	-50.5	1.87421	-50.3	2	-50.4	1.92969
-50.4	1.46094	-50.4	2.14063	-50.3	2.16486	-50.4	1.88593	-50.2	1.94922	-50.3	1.94922
-50.3	1.50781	-50.3	2.16016	-50.2	2.16486	-50.3	1.89374	-50.1	1.95703	-50.2	1.97656
-50.2	1.52734	-50.2	2.19922	-50.1	2.16486	-50.2	1.90546	-50	1.96875	-50.1	1.98828
-50.1	1.51953	-50.1	2.21875	-50	2.14532	-50.1	1.90546	-49.9	1.97656	-50	1.98828
-50	1.52734	-50	2.23047	-49.9	2.14532	-50	1.94452	-49.8	1.98828	-49.9	1.98828
-49.9	1.53906	-49.9	2.24219	-49.8	2.14532	-49.9	1.95624	-49.7	2	-49.8	1.96875
-49.8	1.55859	-49.8	2.23047	-49.7	2.12579	-49.8	1.97577	-49.6	2	-49.7	1.97656
-49.7	1.57031	-49.7	2.23047	-49.6	2.12579	-49.7	1.98749	-49.5	2.01953	-49.6	1.97656
-49.6	1.57813	-49.6	2.24219	-49.5	2.12579	-49.6	1.9953	-49.4	2.01953	-49.5	1.97656
-49.5	1.59766	-49.5	2.24219	-49.4	2.13751	-49.5	1.9953	-49.3	2.02734	-49.4	1.98828
-49.4	1.60938	-49.4	2.25	-49.3	2.13751	-49.4	1.9953	-49.2	2.03906	-49.3	2
-49.3	1.62891	-49.3	2.25	-49.2	2.13751	-49.3	1.9953	-49.1	2.03906	-49.2	2
-49.2	1.64063	-49.2	2.26953	-49.1	2.13751	-49.2	1.9953	-49	2.03906	-49.1	1.98828
-49.1	1.64844	-49.1	2.26953	-49	2.13751	-49.1	1.9953	-48.9	2.02734	-49	1.98828
-49	1.64844	-49	2.26953	-48.9	2.13751	-49	1.9953	-48.8	2.02734	-48.9	1.98828
-48.9	1.64844	-48.9	2.26953	-48.8	2.13751	-48.9	1.9953	-48.7	2.03906	-48.8	1.98828
-48.8	1.66016	-48.8	2.26953	-48.7	2.13751	-48.8	1.9953	-48.6	2.03906	-48.7	1.98828
-48.7	1.67969	-48.7	2.26953	-48.6	2.12579	-48.7	2.00702	-48.5	2.03906	-48.6	2
-48.6	1.67969	-48.6	2.26953	-48.5	2.13751	-48.6	2.01483	-48.4	2.03906	-48.5	2
-48.5	1.67969	-48.5	2.26953	-48.4	2.13751	-48.5	2.01483	-48.3	2.03906	-48.4	2
-48.4	1.6875	-48.4	2.26953	-48.3	2.12579	-48.4	2.01483	-48.2	2.03906	-48.3	2
-48.3	1.69922	-48.3	2.26953	-48.2	2.12579	-48.3	2.02655	-48.1	2.04688	-48.2	2
-48.2	1.71094	-48.2	2.28125	-48.1	2.12579	-48.2	2.02655	-48	2.04688	-48.1	2.00781
-48.1	1.71875	-48.1	2.28125	-48	2.12579	-48.1	2.03436	-47.9	2.03906	-48	2.00781
-48	1.71875	-48	2.28906	-47.9	2.12579	-48	2.04608	-47.8	2.03906	-47.9	2.00781
-47.9	1.71329	-47.9	2.27655	-47.8	2.09766	-47.9	2.05389	-47.7	2.03125	-47.8	2
-47.8	1.6875	-47.8	2.21329	-47.7	2.04297	-47.8	2.07654	-47.6	2.00079	-47.7	1.96014
-47.7	1.67656	-47.7	2.12109	-47.6	2.00861	-47.7	2.09296	-47.5	1.96329	-47.6	1.92188
-47.6	1.64766	-47.6	2.07733	-47.5	1.96954	-47.6	2.08514	-47.4	1.93829	-47.5	1.89063
-47.5	1.62109	-47.5	2.04767	-47.4	1.94922	-47.5	2.07733	-47.3	1.91406	-47.4	1.88281
-47.4	1.59297	-47.4	2.01093	-47.3	1.94611	-47.4	2.0578	-47.2	1.90234	-47.3	1.86328
-47.3	1.575	-47.3	1.96796	-47.2	1.93127	-47.3	2.04138	-47.1	1.8703	-47.2	1.83907
-47.2	1.5625	-47.2	1.95782	-47.1	1.91406	-47.2	2.00702	-47	1.83905	-47.1	1.8125
-47.1	1.53828	-47.1	1.94843	-47	1.87891	-47.1	1.96796	-46.9	1.8125	-47	1.78828
-47	1.51172	-47	1.93829	-46.9	1.87579	-47	1.95154	-46.8	1.78827	-46.9	1.76172
-46.9	1.49219	-46.9	1.92889	-46.8	1.86096	-46.9	1.94141	-46.7	1.76642	-46.8	1.74219
-46.8	1.47266	-46.8	1.91718	-46.7	1.83984	-46.8	1.93201	-46.6	1.76563	-46.7	1.73047
-46.7	1.45938	-46.7	1.91016	-46.6	1.82971	-46.7	1.91718	-46.5	1.73282	-46.6	1.72266
-46.6	1.4539	-46.6	1.89063	-46.5	1.82031	-46.6	1.90076	-46.4	1.71564	-46.5	1.69453
-46.5	1.42969	-46.5	1.87109	-46.4	1.80548	-46.5	1.89844	-46.3	1.70313	-46.4	1.68437
-46.4	1.41328	-46.4	1.85938	-46.3	1.78906	-46.4	1.88123	-46.2	1.69843	-46.3	1.675
-46.3	1.40312	-46.3	1.85468	-46.2	1.77893	-46.3	1.87421	-46.1	1.68359	-46.2	1.66484
-46.2	1.39375	-46.2	1.84454	-46.1	1.78125	-46.2	1.85938	-46	1.67657	-46.1	1.65234
-46.1	1.37891	-46.1	1.83203	-46	1.76251	-46.1	1.84998	-45.9	1.66718	-46	1.63594
-46	1.35938	-46	1.82031	-45.9	1.77423	-46	1.85156	-45.8	1.65234	-45.9	1.63594
-45.9	1.34297	-45.9	1.81561	-45.8	1.77112	-45.9	1.83749	-45.7	1.625	-45.8	1.62578
-45.8	1.34453	-45.8	1.80078	-45.7	1.76642	-45.8	1.80859	-45.6	1.61639	-45.7	1.60156
-45.7	1.33203	-45.7	1.78125	-45.6	1.76172	-45.7	1.80389	-45.5	1.60626	-45.6	1.58516
-45.6	1.31563	-45.6	1.78125	-45.5	1.76331	-45.6	1.81091	-45.4	1.59686	-45.5	1.575
-45.5	1.30391	-45.5	1.77655	-45.4	1.75391	-45.5	1.80078	-45.3	1.59375	-45.4	1.56563
-45.4	1.29375	-45.4	1.7547	-45.3	1.74689	-45.4	1.79138	-45.2	1.57733	-45.3	1.56563
-45.3	1.28125	-45.3	1.75702	-45.2	1.74219	-45.3	1.78125	-45.1	1.5672	-45.2	1.55547
-45.2	1.26953	-45.2	1.74689	-45.1	1.73206	-45.2	1.77185	-45	1.56561	-45.1	1.5461
-45.1	1.26172	-45.1	1.74219	-45	1.72736	-45.1	1.76953	-44.9	1.55548	-45	1.51953
-45	1.24532	-45	1.73749	-44.9	1.72266	-45	1.76013	-44.8	1.54608	-44.9	1.50781
-44.9	1.23515	-44.9	1.73828	-44.8	1.71252	-44.9	1.74841	-44.7	1.53906	-44.8	1.50468
-44.8	1.22578	-44.8	1.73047	-44.7	1.70313	-44.8	1.73828	-44.6	1.54297	-44.7	1.49532
-44.7	1.21407	-44.7	1.71564	-44.6	1.69299	-44.7	1.73358	-44.5	1.53125	-44.6	1.48828
-44.6	1.20703	-44.6	1.71094	-44.5	1.68359	-44.6	1.72888	-44.4	1.53125	-44.5	1.48828
-44.5	1.2039	-44.5	1.71796	-44.4	1.67188	-44.5	1.71875	-44.3	1.52655	-44.4	1.47266
-44.4	1.19922	-44.4	1.71094	-44.3	1.66174	-44.4	1.71405	-44.2	1.53204	-44.3	1.46875
-44.3	1.19922	-44.3	1.71094	-44.2	1.65234	-44.3	1.71405	-44.1	1.53436	-44.2	1.46407
-44.2	1.19922	-44.2	1.70624	-44.1	1.64221	-44.2	1.70935	-44	1.52734	-44.1	1.44609
-44.1	1.19453	-44.1	1.69611	-44	1.63281	-44.1	1.69922	-43.9	1.53595	-44	1.44141
-44	1.1875	-44	1.69922	-43.9	1.62579	-44	1.69452	-43.8	1.53125	-43.9	1.44141
-43.9	1.17265	-43.9	1.69452	-43.8	1.62268	-43.9	1.68982	-43.7	1.53125	-43.8	1.43672
-43.8	1.16797	-43.8	1.67969	-43.7	1.61798	-43.8	1.67499	-43.6	1.53906	-43.7	1.42656
-43.7	1.16328	-43.7	1.68439	-43.6	1.62579	-43.7	1.67499	-43.5	1.53906	-43.6	1.41016
-43.6	1.14844	-43.6	1.67188	-43.5	1.63281	-43.6	1.65857	-43.4	1.53436	-43.5	1.40547
-43.5	1.14531	-43.5	1.67499	-43.4	1.62579	-43.5	1.64844	-43.3	1.52423	-43.4	1.39844
-43.4	1.14063	-43.4	1.66797	-43.3	1.63049	-43.4	1.64374	-43.2	1.53125	-43.3	1.41016
-43.3	1.14063	-43.3	1.66486	-43.2	1.62109	-43.3	1.63904	-43.1	1.52655	-43.2	1.41016
-43.2	1.13594	-43.2	1.66251	-43.1	1.60938	-43.2	1.62891	-43	1.51953	-43.1	1.41484
-43.1	1.13672	-43.1	1.64844	-43	1.59924	-43.1	1.61951	-42.9	1.52814	-43	1.39766
-43	1.13672	-43	1.64532	-42.9	1.60626	-43	1.61249	-42.8	1.53125	-42.9	1.39531
-42.9	1.12891	-42.9	1.64374	-42.8	1.60156	-42.9	1.61249	-42.7	1.53827	-42.8	1.38594
-42.8	1.12422	-42.8	1.62579	-42.7	1.58673	-42.8	1.59686	-42.6	1.53906	-42.7	1.37109
-42.7	1.11719	-42.7	1.62109	-42.6	1.58282	-42.7	1.58203	-42.5	1.53906	-42.6	1.35469
-42.6	1.11406	-42.6	1.61639	-42.5	1.57971	-42.6	1.56561	-42.4	1.53595	-42.5	1.34453
-42.5	1.10938	-42.5	1.60938	-42.4	1.57031	-42.5	1.56091	-42.3	1.53125	-42.4	1.35156
-42.4	1.1125	-42.4	1.60938	-42.3	1.56329	-42.4	1.55389	-42.2	1.5336	-42.3	1.33516
-42.3	1.10547	-42.3	1.60626	-42.2	1.5719	-42.3	1.53748	-42.1	1.51642	-42.2	1.32813
-42.2	1.11406	-42.2	1.59686	-42.1	1.5625	-42.2	1.51953	-42	1.50702	-42.1	1.325
-42.1	1.10938	-42.1	1.57813	-42	1.55078	-42.1	1.51483	-41.9	1.49689	-42	1.32031
-42	1.09297	-42	1.57501	-41.9	1.54065	-42	1.51013	-41.8	1.5	-41.9	1.31563
-41.9	1.08594	-41.9	1.57031	-41.8	1.53595	-41.9	1.48828	-41.7	1.4953	-41.8	1.32031
-41.8	1.07813	-41.8	1.57031	-41.7	1.53125	-41.8	1.47888	-41.6	1.48828	-41.7	1.30859
-41.7	1.075	-41.7	1.56561	-41.6	1.52112	-41.7	1.46405	-41.5	1.48517	-41.6	1.30547
-41.6	1.07813	-41.6	1.55859	-41.5	1.51172	-41.6	1.46405	-41.4	1.47577	-41.5	1.30078
-41.5	1.07813	-41.5	1.55859	-41.4	1.5047	-41.5	1.45233	-41.3	1.45624	-41.4	1.28906
-41.4	1.07344	-41.4	1.55389	-41.3	1.50159	-41.4	1.45233	-41.2	1.45703	-41.3	1.28906
-41.3	1.06641	-41.3	1.53906	-41.2	1.50391	-41.3	1.44141	-41.1	1.46564	-41.2	1.28438
-41.2	1.07813	-41.2	1.53595	-41.1	1.49219	-41.2	1.43671	-41	1.46405	-41.1	1.27734
-41.1	1.07031	-41.1	1.53125	-41	1.48206	-41.1	1.42029	-40.9	1.45392	-41	1.27734
-41	1.05859	-41	1.52655	-40.9	1.47736	-41	1.41327	-40.8	1.44452	-40.9	1.28203
-40.9	1.05859	-40.9	1.52734	-40.8	1.48047	-40.9	1.41327	-40.7	1.42969	-40.8	1.28906
-40.8	1.05391	-40.8	1.51642	-40.7	1.47034	-40.8	1.41327	-40.6	1.42657	-40.7	1.28438
-40.7	1.04375	-40.7	1.50702	-40.6	1.46564	-40.7	1.41797	-40.5	1.42188	-40.6	1.27734
-40.6	1.03906	-40.6	1.5	-40.5	1.46094	-40.6	1.41248	-40.4	1.40546	-40.5	1.27734
-40.5	1.03906	-40.5	1.50781	-40.4	1.45081	-40.5	1.39374	-40.3	1.38751	-40.4	1.27266
-40.4	1.03906	-40.4	1.50781	-40.3	1.43359	-40.4	1.39374	-40.2	1.37811	-40.3	1.25781
-40.3	1.03438	-40.3	1.5047	-40.2	1.42657	-40.3	1.38202	-40.1	1.35468	-40.2	1.25468
-40.2	1.01563	-40.2	1.50781	-40.1	1.43439	-40.2	1.37891	-40	1.34454	-40.1	1.25
-40.1	1.0125	-40.1	1.50702	-40	1.43439	-40.1	1.36169	-39.9	1.33514	-40	1.25
-40	1.00313	-40	1.5	-39.9	1.43127	-40	1.35468	-39.8	1.32501	-39.9	1.25
-39.9	0.988281	-39.9	1.49689	-39.8	1.42188	-39.9	1.33826	-39.7	1.3078	-39.8	1.24532
-39.8	0.976563	-39.8	1.49219	-39.7	1.40704	-39.8	1.33594	-39.6	1.29767	-39.7	1.23828
-39.7	0.976563	-39.7	1.48047	-39.6	1.39063	-39.7	1.33044	-39.5	1.28516	-39.6	1.22343
-39.6	0.984375	-39.6	1.47577	-39.5	1.38361	-39.6	1.31641	-39.4	1.26483	-39.5	1.21875
-39.5	0.992966	-39.5	1.46875	-39.4	1.38049	-39.5	1.32343	-39.3	1.26642	-39.4	1.22578
-39.4	0.983597	-39.4	1.46564	-39.3	1.39844	-39.4	1.32343	-39.2	1.25391	-39.3	1.21875
-39.3	0.964066	-39.3	1.46405	-39.2	1.41486	-39.3	1.33124	-39.1	1.26172	-39.2	1.21172
-39.2	0.961716	-39.2	1.48047	-39.1	1.41486	-39.2	1.35938	-39	1.27655	-39.1	1.22188
-39.1	0.96875	-39.1	1.46875	-39	1.41956	-39.1	1.35468	-38.9	1.26953	-39	1.23125
-39	0.96875	-39	1.48126	-38.9	1.42657	-39	1.36249	-38.8	1.25781	-38.9	1.23828
-38.9	0.96875	-38.9	1.50781	-38.8	1.42188	-38.9	1.38672	-38.7	1.26251	-38.8	1.25
-38.8	0.973434	-38.8	1.51953	-38.7	1.41565	-38.8	1.40466	-38.6	1.27264	-38.7	1.25781
-38.7	0.980469	-38.7	1.51172	-38.6	1.43439	-38.7	1.42108	-38.5	1.26953	-38.6	1.27734
-38.6	0.9711	-38.6	1.5047	-38.5	1.43127	-38.6	1.42499	-38.4	1.28204	-38.5	1.30156
-38.5	0.961716	-38.5	1.50702	-38.4	1.45392	-38.5	1.42578	-38.3	1.32031	-38.4	1.33281
-38.4	0.976563	-38.4	1.52814	-38.3	1.48596	-38.4	1.43591	-38.2	1.38437	-38.3	1.36719
-38.3	1.00078	-38.3	1.60626	-38.2	1.52423	-38.3	1.42188	-38.1	1.41016	-38.2	1.39063
-38.2	1.05547	-38.2	1.65234	-38.1	1.47971	-38.2	1.37341	-38	1.38202	-38.1	1.34688
-38.1	1.07344	-38.1	1.48438	-38	1.27502	-38.1	1.2742	-37.9	1.18829	-38	1.13359
-38	0.914841	-38	1.17889	-37.9	0.987518	-38	1.09216	-37.8	0.876556	-37.9	0.829681
-37.9	0.669525	-37.9	1.01328	-37.8	0.771881	-37.9	0.915619	-37.7	0.646088	-37.8	0.610931
-37.8	0.475006	-37.8	0.878113	-37.7	0.649231	-37.8	0.799194	-37.6	0.471863	-37.7	0.528122
-37.7	0.292191	-37.7	0.864075	-37.6	0.697662	-37.7	0.741394	-37.5	0.43515	-37.6	0.543747
-37.6	0.175003	-37.6	0.890625	-37.5	0.750793	-37.6	0.797638	-37.4	0.524231	-37.5	0.582809
-37.5	0.196869	-37.5	0.974213	-37.4	0.802368	-37.5	0.861694	-37.3	0.637512	-37.4	0.664063
-37.4	0.273438	-37.4	1.01093	-37.3	0.864868	-37.4	0.918732	-37.2	0.703125	-37.3	0.719528
-37.3	0.328903	-37.3	1.03986	-37.2	0.918762	-37.3	0.967957	-37.1	0.758606	-37.2	0.770309
-37.2	0.387497	-37.2	1.07892	-37.1	0.961731	-37.2	1.02344	-37	0.809387	-37.1	0.821091
-37.1	0.441406	-37.1	1.11719	-37	0.982819	-37.1	1.06952	-36.9	0.847656	-37	0.859375
-37	0.484375	-37	1.13361	-36.9	1	-37	1.09766	-36.8	0.883606	-36.9	0.874222
-36.9	0.520309	-36.9	1.14063	-36.8	1.00079	-36.9	1.10779	-36.7	0.90155	-36.8	0.871872
-36.8	0.532028	-36.8	1.15546	-36.7	1.01721	-36.8	1.11249	-36.6	0.922668	-36.7	0.878906
-36.7	0.546875	-36.7	1.16016	-36.6	1.01953	-36.7	1.11249	-36.5	0.9422	-36.6	0.882034
-36.6	0.561722	-36.6	1.15314	-36.5	1.02423	-36.6	1.11719	-36.4	0.96405	-36.5	0.891403
-36.5	0.563278	-36.5	1.16016	-36.4	1.01251	-36.5	1.12421	-36.3	0.992981	-36.4	0.898438
-36.4	0.578125	-36.4	1.16327	-36.3	1.01251	-36.4	1.12421	-36.2	1.01251	-36.3	0.890625
-36.3	0.597656	-36.3	1.17267	-36.2	1.0047	-36.3	1.11951	-36.1	1.03906	-36.2	0.890625
-36.2	0.614059	-36.2	1.17969	-36.1	1.0047	-36.2	1.11719	-36	1.05078	-36.1	0.890625
-36.1	0.624222	-36.1	1.17657	-36	0.992981	-36.1	1.12421	-35.9	1.05078	-36	0.878906
-36	0.625	-36	1.18359	-35.9	0.992981	-36	1.11951	-35.8	1.05078	-35.9	0.882034
-35.9	0.646088	-35.9	1.17889	-35.8	0.997681	-35.9	1.11719	-35.7	1.04608	-35.8	0.898438
-35.8	0.667969	-35.8	1.16016	-35.7	1.0047	-35.8	1.12421	-35.6	1.03595	-35.7	0.896088
-35.7	0.690628	-35.7	1.16486	-35.6	1.0094	-35.7	1.12732	-35.5	1.03436	-35.6	0.913284
-35.6	0.714844	-35.6	1.17499	-35.5	1.01953	-35.6	1.13672	-35.4	1.03906	-35.5	0.922653
-35.5	0.719528	-35.5	1.17578	-35.4	1.03204	-35.5	1.14374	-35.3	1.03595	-35.4	0.9375
-35.4	0.731247	-35.4	1.1875	-35.3	1.04846	-35.4	1.15546	-35.2	1.02264	-35.3	0.949219
-35.3	0.738281	-35.3	1.18439	-35.2	1.05859	-35.3	1.16016	-35.1	1.02734	-35.2	0.957031
-35.2	0.753128	-35.2	1.19452	-35.1	1.06018	-35.2	1.16718	-35	1.02734	-35.1	0.96875
-35.1	0.757813	-35.1	1.1875	-35	1.05859	-35.1	1.16718	-34.9	1.03204	-35	0.960938
-35	0.762497	-35	1.1875	-34.9	1.06329	-35	1.15857	-34.8	1.03906	-34.9	0.960938
-34.9	0.753128	-34.9	1.1922	-34.8	1.04846	-34.9	1.16327	-34.7	1.03436	-34.8	0.960938
-34.8	0.754684	-34.8	1.19452	-34.7	1.04376	-34.8	1.16327	-34.6	1.02734	-34.7	0.949219
-34.7	0.738281	-34.7	1.20392	-34.6	1.03595	-34.7	1.16797	-34.5	1.02423	-34.6	0.957031
-34.6	0.733597	-34.6	1.19922	-34.5	1.03595	-34.6	1.17029	-34.4	1.01953	-34.5	0.957031
-34.5	0.723434	-34.5	1.19452	-34.4	1.03595	-34.5	1.16327	-34.3	1.01953	-34.4	0.957031
-34.4	0.71875	-34.4	1.17657	-34.3	1.01642	-34.4	1.16016	-34.2	1.01953	-34.3	0.957031
-34.3	0.714066	-34.3	1.16016	-34.2	1.01642	-34.3	1.15546	-34.1	1.01953	-34.2	0.949219
-34.2	0.707031	-34.2	1.16016	-34.1	1.0047	-34.2	1.15076	-34	1.01953	-34.1	0.949219
-34.1	0.707031	-34.1	1.16016	-34	1.01642	-34.1	1.14374	-33.9	1.01483	-34	0.949219
-34	0.711716	-34	1.14844	-33.9	1.01642	-34	1.13904	-33.8	1	-33.9	0.949219
-33.9	0.714066	-33.9	1.14844	-33.8	1.01642	-33.9	1.1203	-33.7	1	-33.8	0.946091
-33.8	0.71875	-33.8	1.14063	-33.7	1	-33.8	1.11719	-33.6	0.996887	-33.7	0.941406
-33.7	0.71875	-33.7	1.14063	-33.6	1.0094	-33.7	1.11249	-33.5	0.980469	-33.6	0.941406
-33.6	0.71875	-33.6	1.12891	-33.5	1.01172	-33.6	1.11249	-33.4	0.975769	-33.5	0.941406
-33.5	0.71875	-33.5	1.12891	-33.4	1.0047	-33.5	1.11249	-33.3	0.96405	-33.4	0.936722
-33.4	0.715622	-33.4	1.11639	-33.3	1.01251	-33.4	1.10779	-33.2	0.953918	-33.3	0.934372
-33.3	0.710938	-33.3	1.10626	-33.2	1.01251	-33.3	1.10938	-33.1	0.949219	-33.2	0.941406
-33.2	0.710938	-33.2	1.10156	-33.1	1.01251	-33.2	1.09998	-33	0.944519	-33.1	0.941406
-33.1	0.721878	-33.1	1.09686	-33	1.01251	-33.1	1.08984	-32.9	0.9375	-33	0.941406
-33	0.726563	-33	1.08984	-32.9	1.02112	-33	1.08044	-32.8	0.934387	-32.9	0.941406
-32.9	0.726563	-32.9	1.08673	-32.8	1.01642	-32.9	1.07343	-32.7	0.921875	-32.8	0.936722
-32.8	0.726563	-32.8	1.08203	-32.7	1.01172	-32.8	1.07031	-32.6	0.921875	-32.7	0.934372
-32.7	0.726563	-32.7	1.07733	-32.6	1.0047	-32.7	1.06091	-32.5	0.921875	-32.6	0.936722
-32.6	0.71875	-32.6	1.07031	-32.5	1.0047	-32.6	1.05389	-32.4	0.921875	-32.5	0.9375
-32.5	0.731247	-32.5	1.07031	-32.4	1.0047	-32.5	1.04919	-32.3	0.917175	-32.4	0.9375
-32.4	0.738281	-32.4	1.07813	-32.3	1.01642	-32.4	1.05389	-32.2	0.910156	-32.3	0.9375
-32.3	0.738281	-32.3	1.07813	-32.2	1.02112	-32.3	1.05389	-32.1	0.910156	-32.2	0.949219
-32.2	0.738281	-32.2	1.07501	-32.1	1.02814	-32.2	1.05389	-32	0.907043	-32.1	0.949219
-32.1	0.733597	-32.1	1.0578	-32	1.02814	-32.1	1.05389	-31.9	0.902344	-32	0.949219
-32	0.726563	-32	1.05078	-31.9	1.03595	-32	1.06641	-31.8	0.902344	-31.9	0.953903
-31.9	0.723434	-31.9	1.05078	-31.8	1.03906	-31.9	1.07343	-31.7	0.897644	-31.8	0.960938
-31.8	0.721878	-31.8	1.03906	-31.7	1.04376	-31.8	1.07343	-31.6	0.890625	-31.7	0.956253
-31.7	0.723434	-31.7	1.03906	-31.6	1.04065	-31.7	1.06873	-31.5	0.898438	-31.6	0.944534
-31.6	0.730469	-31.6	1.03906	-31.5	1.04767	-31.6	1.05859	-31.4	0.895325	-31.5	0.9375
-31.5	0.730469	-31.5	1.03906	-31.4	1.04767	-31.5	1.04608	-31.3	0.893738	-31.4	0.934372
-31.4	0.730469	-31.4	1.03906	-31.3	1.05548	-31.4	1.04138	-31.2	0.895325	-31.3	0.929688
-31.3	0.725784	-31.3	1.03436	-31.2	1.05078	-31.3	1.02734	-31.1	0.902344	-31.2	0.929688
-31.2	0.714066	-31.2	1.02423	-31.1	1.04376	-31.2	1.04608	-31	0.885925	-31.1	0.929688
-31.1	0.707031	-31.1	1.01172	-31	1.04376	-31.1	1.02966	-30.9	0.878906	-31	0.929688
-31	0.707031	-31	1.01172	-30.9	1.04767	-31	1.02264	-30.8	0.890625	-30.9	0.925003
-30.9	0.703903	-30.9	1.00311	-30.8	1.03595	-30.9	1.01953	-30.7	0.890625	-30.8	0.922653
-30.8	0.707031	-30.8	1.01953	-30.7	1.02814	-30.8	1.01483	-30.6	0.890625	-30.7	0.925003
-30.7	0.707031	-30.7	1.01642	-30.6	1.01172	-30.7	1.01483	-30.5	0.890625	-30.6	0.914841
-30.6	0.707031	-30.6	0.9953	-30.5	0.989868	-30.6	0.998413	-30.4	0.885925	-30.5	0.910156
-30.5	0.707031	-30.5	0.985168	-30.4	0.992188	-30.5	0.996094	-30.3	0.867188	-30.4	0.905472
-30.4	0.699219	-30.4	0.972656	-30.3	0.97345	-30.4	1.00311	-30.2	0.864075	-30.3	0.895309
-30.3	0.699219	-30.3	0.956238	-30.2	0.97345	-30.3	1.00311	-30.1	0.871094	-30.2	0.890625
-30.2	0.699219	-30.2	0.946106	-30.1	0.985168	-30.2	1.00311	-30	0.871094	-30.1	0.874222
-30.1	0.699219	-30.1	0.936707	-30	0.985168	-30.1	1.00311	-29.9	0.871094	-30	0.878906
-30	0.699219	-30	0.926575	-29.9	0.97345	-30	0.998413	-29.8	0.871094	-29.9	0.871094
-29.9	0.699219	-29.9	0.921875	-29.8	0.97345	-29.9	0.991394	-29.7	0.866394	-29.8	0.859375
-29.8	0.702347	-29.8	0.905457	-29.7	0.970337	-29.8	0.980469	-29.6	0.856262	-29.7	0.854691
-29.7	0.695313	-29.7	0.893738	-29.6	0.960938	-29.7	0.983582	-29.5	0.851563	-29.6	0.844528
-29.6	0.695313	-29.6	0.891418	-29.5	0.946106	-29.6	0.983582	-29.4	0.846863	-29.5	0.835159
-29.5	0.699997	-29.5	0.898438	-29.4	0.942993	-29.5	0.978882	-29.3	0.839844	-29.4	0.828125
-29.4	0.702347	-29.4	0.898438	-29.3	0.946106	-29.4	0.96405	-29.2	0.839844	-29.3	0.824997
-29.3	0.695313	-29.3	0.910156	-29.2	0.938293	-29.3	0.96875	-29.1	0.839844	-29.2	0.832031
-29.2	0.695313	-29.2	0.893738	-29.1	0.926575	-29.2	0.96405	-29	0.836731	-29.1	0.815628
-29.1	0.695313	-29.1	0.891418	-29	0.926575	-29.1	0.967163	-28.9	0.832031	-29	0.808594
-29	0.695313	-29	0.898438	-28.9	0.926575	-29	0.971863	-28.8	0.827332	-28.9	0.805466
-28.9	0.692184	-28.9	0.898438	-28.8	0.918762	-28.9	0.971863	-28.7	0.820313	-28.8	0.807816
-28.8	0.679688	-28.8	0.885925	-28.7	0.907043	-28.8	0.96405	-28.6	0.8172	-28.7	0.800781
-28.7	0.675003	-28.7	0.878906	-28.6	0.902344	-28.7	0.971863	-28.5	0.8125	-28.6	0.784378
-28.6	0.65625	-28.6	0.878906	-28.5	0.895325	-28.6	0.971863	-28.4	0.800781	-28.5	0.774216
-28.5	0.65625	-28.5	0.878906	-28.4	0.895325	-28.5	0.96405	-28.3	0.800781	-28.4	0.769531
-28.4	0.648438	-28.4	0.878906	-28.3	0.878906	-28.4	0.96405	-28.2	0.796082	-28.3	0.769531
-28.3	0.65625	-28.3	0.878906	-28.2	0.871887	-28.3	0.96405	-28.1	0.800781	-28.2	0.764847
-28.2	0.648438	-28.2	0.871887	-28.1	0.868774	-28.2	0.952332	-28	0.789063	-28.1	0.754684
-28.1	0.648438	-28.1	0.878906	-28	0.875793	-28.1	0.952332	-27.9	0.800781	-28	0.75
-28	0.636719	-28	0.883606	-27.9	0.864075	-28	0.936707	-27.8	0.796082	-27.9	0.745316
-27.9	0.636719	-27.9	0.890625	-27.8	0.864075	-27.9	0.913269	-27.7	0.793762	-27.8	0.738281
-27.8	0.633591	-27.8	0.885925	-27.7	0.864075	-27.8	0.902344	-27.6	0.800781	-27.7	0.738281
-27.7	0.628906	-27.7	0.895325	-27.6	0.856262	-27.7	0.892944	-27.5	0.800781	-27.6	0.738281
-27.6	0.628906	-27.6	0.882813	-27.5	0.856262	-27.6	0.885925	-27.4	0.800781	-27.5	0.735153
-27.5	0.604691	-27.5	0.882813	-27.4	0.856262	-27.5	0.874207	-27.3	0.808594	-27.4	0.730469
-27.4	0.585938	-27.4	0.882813	-27.3	0.856262	-27.4	0.862488	-27.2	0.808594	-27.3	0.730469
-27.3	0.578125	-27.3	0.882813	-27.2	0.856262	-27.3	0.849976	-27.1	0.808594	-27.2	0.71875
-27.2	0.563278	-27.2	0.882813	-27.1	0.844543	-27.2	0.847656	-27	0.808594	-27.1	0.71875
-27.1	0.558594	-27.1	0.871094	-27	0.844543	-27.1	0.838257	-26.9	0.808594	-27	0.730469
-27	0.553909	-27	0.871094	-26.9	0.844543	-27	0.831238	-26.8	0.808594	-26.9	0.730469
-26.9	0.539063	-26.9	0.871094	-26.8	0.836731	-26.9	0.823425	-26.7	0.803894	-26.8	0.725784
-26.8	0.527344	-26.8	0.871094	-26.7	0.836731	-26.8	0.816406	-26.6	0.796875	-26.7	0.707031
-26.7	0.527344	-26.7	0.874207	-26.6	0.836731	-26.7	0.823425	-26.5	0.796875	-26.6	0.707031
-26.6	0.507813	-26.6	0.883606	-26.5	0.825012	-26.6	0.815613	-26.4	0.801575	-26.5	0.707031
-26.5	0.496094	-26.5	0.882813	-26.4	0.820313	-26.5	0.803894	-26.3	0.800781	-26.4	0.71875
-26.4	0.488281	-26.4	0.882813	-26.3	0.805481	-26.4	0.799194	-26.2	0.808594	-26.3	0.71875
-26.3	0.488281	-26.3	0.882813	-26.2	0.793762	-26.3	0.792175	-26.1	0.800781	-26.2	0.707031
-26.2	0.476563	-26.2	0.871094	-26.1	0.793762	-26.2	0.792175	-26	0.796082	-26.1	0.707031
-26.1	0.476563	-26.1	0.882813	-26	0.793762	-26.1	0.789063	-25.9	0.789063	-26	0.699219
-26	0.476563	-26	0.882813	-25.9	0.798462	-26	0.772644	-25.8	0.777344	-25.9	0.699219
-25.9	0.46875	-25.9	0.871094	-25.8	0.805481	-25.9	0.764832	-25.7	0.777344	-25.8	0.699219
-25.8	0.473434	-25.8	0.871094	-25.7	0.810181	-25.8	0.764832	-25.6	0.769531	-25.7	0.696091
-25.7	0.46875	-25.7	0.874207	-25.6	0.8172	-25.7	0.753113	-25.5	0.769531	-25.6	0.679688
-25.6	0.464066	-25.6	0.878906	-25.5	0.8172	-25.6	0.756226	-25.4	0.757813	-25.5	0.679688
-25.5	0.457031	-25.5	0.878906	-25.4	0.8172	-25.5	0.753113	-25.3	0.757813	-25.4	0.671875
-25.4	0.449219	-25.4	0.878906	-25.3	0.820313	-25.4	0.753113	-25.2	0.762512	-25.3	0.667191
-25.3	0.4375	-25.3	0.883606	-25.2	0.825012	-25.3	0.757813	-25.1	0.769531	-25.2	0.660156
-25.2	0.4375	-25.2	0.890625	-25.1	0.821899	-25.2	0.764832	-25	0.764832	-25.1	0.648438
-25.1	0.429688	-25.1	0.882813	-25	0.820313	-25.1	0.764832	-24.9	0.75	-25	0.653122
-25	0.417969	-25	0.885925	-24.9	0.821899	-25	0.769531	-24.8	0.746887	-24.9	0.655472
-24.9	0.417969	-24.9	0.895325	-24.8	0.8172	-24.9	0.77655	-24.7	0.733582	-24.8	0.653122
-24.8	0.422653	-24.8	0.913269	-24.7	0.8172	-24.8	0.764832	-24.6	0.738281	-24.7	0.660156
-24.7	0.417969	-24.7	0.922668	-24.6	0.8172	-24.7	0.764832	-24.5	0.730469	-24.6	0.660156
-24.6	0.417969	-24.6	0.917175	-24.5	0.8172	-24.6	0.767944	-24.4	0.730469	-24.5	0.655472
-24.5	0.410156	-24.5	0.917969	-24.4	0.8172	-24.5	0.764832	-24.3	0.71875	-24.4	0.660156
-24.4	0.413284	-24.4	0.917969	-24.3	0.8172	-24.4	0.764832	-24.2	0.71875	-24.3	0.648438
-24.3	0.417969	-24.3	0.917969	-24.2	0.820313	-24.3	0.753113	-24.1	0.71875	-24.2	0.648438
-24.2	0.40625	-24.2	0.917969	-24.1	0.821899	-24.2	0.757813	-24	0.711731	-24.1	0.640625
-24.1	0.398438	-24.1	0.929688	-24	0.828918	-24.1	0.764832	-23.9	0.710938	-24	0.640625
-24	0.398438	-24	0.934387	-23.9	0.828918	-24	0.767944	-23.8	0.710938	-23.9	0.640625
-23.9	0.398438	-23.9	0.941406	-23.8	0.828918	-23.9	0.772644	-23.7	0.710938	-23.8	0.628906
-23.8	0.40625	-23.8	0.941406	-23.7	0.828918	-23.8	0.777344	-23.6	0.715637	-23.7	0.628906
-23.7	0.40625	-23.7	0.941406	-23.6	0.828918	-23.7	0.784363	-23.5	0.71405	-23.6	0.628906
-23.6	0.40625	-23.6	0.946106	-23.5	0.836731	-23.6	0.792175	-23.4	0.71875	-23.5	0.617188
-23.5	0.40625	-23.5	0.953125	-23.4	0.836731	-23.5	0.803894	-23.3	0.71875	-23.4	0.617188
-23.4	0.40625	-23.4	0.953125	-23.3	0.836731	-23.4	0.803894	-23.2	0.71875	-23.3	0.621872
-23.3	0.40625	-23.3	0.953125	-23.2	0.836731	-23.3	0.803894	-23.1	0.71875	-23.2	0.628906
-23.2	0.40625	-23.2	0.941406	-23.1	0.836731	-23.2	0.811707	-23	0.71875	-23.1	0.628906
-23.1	0.40625	-23.1	0.936707	-23	0.832031	-23.1	0.823425	-22.9	0.71875	-23	0.628906
-23	0.40625	-23	0.929688	-22.9	0.825012	-23	0.823425	-22.8	0.72345	-22.9	0.621094
-22.9	0.417969	-22.9	0.929688	-22.8	0.836731	-22.9	0.823425	-22.7	0.730469	-22.8	0.624222
-22.8	0.417969	-22.8	0.934387	-22.7	0.832031	-22.8	0.815613	-22.6	0.730469	-22.7	0.628906
-22.7	0.417969	-22.7	0.941406	-22.6	0.825012	-22.7	0.815613	-22.5	0.722656	-22.6	0.641403
-22.6	0.417969	-22.6	0.936707	-22.5	0.821899	-22.6	0.815613	-22.4	0.722656	-22.5	0.640625
-22.5	0.425781	-22.5	0.941406	-22.4	0.8125	-22.5	0.815613	-22.3	0.710938	-22.4	0.640625
-22.4	0.425781	-22.4	0.941406	-22.3	0.805481	-22.4	0.815613	-22.2	0.710938	-22.3	0.640625
-22.3	0.434372	-22.3	0.936707	-22.2	0.802368	-22.3	0.820313	-22.1	0.71405	-22.2	0.640625
-22.2	0.429688	-22.2	0.917969	-22.1	0.797668	-22.2	0.827332	-22	0.71875	-22.1	0.628906
-22.1	0.425003	-22.1	0.917969	-22	0.805481	-22.1	0.822632	-21.9	0.730469	-22	0.628906
-22	0.417969	-22	0.922668	-21.9	0.805481	-22	0.815613	-21.8	0.730469	-21.9	0.628906
-21.9	0.429688	-21.9	0.924988	-21.8	0.800781	-21.9	0.815613	-21.7	0.727356	-21.8	0.624222
-21.8	0.434372	-21.8	0.910156	-21.7	0.793762	-21.8	0.815613	-21.6	0.722656	-21.7	0.609375
-21.7	0.441406	-21.7	0.910156	-21.6	0.793762	-21.7	0.815613	-21.5	0.722656	-21.6	0.609375
-21.6	0.441406	-21.6	0.898438	-21.5	0.790649	-21.6	0.810913	-21.4	0.722656	-21.5	0.609375
-21.5	0.449219	-21.5	0.898438	-21.4	0.78595	-21.5	0.803894	-21.3	0.717957	-21.4	0.594528
-21.4	0.449219	-21.4	0.898438	-21.3	0.792969	-21.4	0.803894	-21.2	0.71875	-21.3	0.604691
-21.3	0.460938	-21.3	0.895325	-21.2	0.78125	-21.3	0.800781	-21.1	0.710938	-21.2	0.606247
-21.2	0.464066	-21.2	0.890625	-21.1	0.774231	-21.2	0.796082	-21	0.71875	-21.1	0.612503
-21.1	0.476563	-21.1	0.885925	-21	0.771118	-21.1	0.796082	-20.9	0.71875	-21	0.609375
-21	0.473434	-21	0.878906	-20.9	0.761719	-21	0.784363	-20.8	0.71875	-20.9	0.609375
-20.9	0.46875	-20.9	0.875793	-20.8	0.7547	-20.9	0.779663	-20.7	0.71875	-20.8	0.609375
-20.8	0.46875	-20.8	0.871094	-20.7	0.759399	-20.8	0.772644	-20.6	0.730469	-20.7	0.614059
-20.7	0.464066	-20.7	0.866394	-20.6	0.75	-20.7	0.757813	-20.5	0.730469	-20.6	0.612503
-20.6	0.461716	-20.6	0.859375	-20.5	0.742981	-20.6	0.753113	-20.4	0.730469	-20.5	0.625778
-20.5	0.46875	-20.5	0.859375	-20.4	0.742981	-20.5	0.753113	-20.3	0.730469	-20.4	0.621094
-20.4	0.475784	-20.4	0.847656	-20.3	0.739868	-20.4	0.753113	-20.2	0.730469	-20.3	0.621094
-20.3	0.457031	-20.3	0.839844	-20.2	0.735168	-20.3	0.748413	-20.1	0.730469	-20.2	0.616409
-20.2	0.457031	-20.2	0.836731	-20.1	0.742188	-20.2	0.741394	-20	0.730469	-20.1	0.609375
-20.1	0.46875	-20.1	0.827332	-20	0.735168	-20.1	0.738281	-19.9	0.727356	-20	0.617188
-20	0.465622	-20	0.820313	-19.9	0.732056	-20	0.733582	-19.8	0.722656	-19.9	0.617188
-19.9	0.460938	-19.9	0.820313	-19.8	0.730469	-19.9	0.728882	-19.7	0.717957	-19.8	0.628906
-19.8	0.460938	-19.8	0.820313	-19.7	0.72345	-19.8	0.721863	-19.6	0.710938	-19.7	0.628906
-19.7	0.456253	-19.7	0.808594	-19.6	0.72345	-19.7	0.71405	-19.5	0.706238	-19.6	0.628906
-19.6	0.449219	-19.6	0.797668	-19.5	0.72345	-19.6	0.71405	-19.4	0.707031	-19.5	0.628906
-19.5	0.457031	-19.5	0.78125	-19.4	0.71875	-19.5	0.710938	-19.3	0.707031	-19.4	0.640625
-19.4	0.457031	-19.4	0.78125	-19.3	0.708618	-19.4	0.701538	-19.2	0.696106	-19.3	0.640625
-19.3	0.452347	-19.3	0.773438	-19.2	0.703918	-19.3	0.694519	-19.1	0.691406	-19.2	0.645309
-19.2	0.453903	-19.2	0.773438	-19.1	0.696106	-19.2	0.6828	-19	0.691406	-19.1	0.640625
-19.1	0.449219	-19.1	0.757019	-19	0.684387	-19.1	0.670288	-18.9	0.674988	-19	0.635941
-19	0.4375	-19	0.75	-18.9	0.691406	-19	0.671082	-18.8	0.667969	-18.9	0.640625
-18.9	0.444534	-18.9	0.725769	-18.8	0.681274	-18.9	0.660156	-18.7	0.664856	-18.8	0.648438
-18.8	0.4375	-18.8	0.71875	-18.7	0.671875	-18.8	0.655457	-18.6	0.660156	-18.7	0.648438
-18.7	0.434372	-18.7	0.707031	-18.6	0.661743	-18.7	0.655457	-18.5	0.671875	-18.6	0.643753
-18.6	0.429688	-18.6	0.696106	-18.5	0.652344	-18.6	0.650757	-18.4	0.655457	-18.5	0.648438
-18.5	0.429688	-18.5	0.679688	-18.4	0.640625	-18.5	0.65155	-18.3	0.648438	-18.4	0.648438
-18.4	0.429688	-18.4	0.679688	-18.3	0.642212	-18.4	0.65155	-18.2	0.645325	-18.3	0.65625
-18.3	0.425003	-18.3	0.671875	-18.2	0.632813	-18.3	0.648438	-18.1	0.631256	-18.2	0.667969
-18.2	0.417969	-18.2	0.655457	-18.1	0.625793	-18.2	0.643738	-18	0.614075	-18.1	0.664841
-18.1	0.417969	-18.1	0.648438	-18	0.622681	-18.1	0.643738	-17.9	0.609375	-18	0.660156
-18	0.414841	-18	0.645325	-17.9	0.621094	-18	0.639038	-17.8	0.59375	-17.9	0.660156
-17.9	0.410156	-17.9	0.640625	-17.8	0.614075	-17.9	0.624207	-17.7	0.589844	-17.8	0.660156
-17.8	0.410156	-17.8	0.640625	-17.7	0.606262	-17.8	0.624207	-17.6	0.585144	-17.7	0.663284
-17.7	0.405472	-17.7	0.635925	-17.6	0.594543	-17.7	0.624207	-17.5	0.575012	-17.6	0.65625
-17.6	0.398438	-17.6	0.628906	-17.5	0.594543	-17.6	0.609375	-17.4	0.570313	-17.5	0.65625
-17.5	0.40625	-17.5	0.628906	-17.4	0.589844	-17.5	0.599976	-17.3	0.565613	-17.4	0.664841
-17.4	0.403122	-17.4	0.628906	-17.3	0.579712	-17.4	0.592957	-17.2	0.558594	-17.3	0.655472
-17.3	0.398438	-17.3	0.625793	-17.2	0.575012	-17.3	0.585144	-17.1	0.547668	-17.2	0.660156
-17.2	0.398438	-17.2	0.613281	-17.1	0.582031	-17.2	0.573425	-17	0.542969	-17.1	0.664841
-17.1	0.405472	-17.1	0.613281	-17	0.563293	-17.1	0.568726	-16.9	0.53125	-17	0.655472
-17	0.393753	-17	0.601563	-16.9	0.575012	-17	0.561707	-16.8	0.52655	-16.9	0.643753
-16.9	0.386719	-16.9	0.608582	-16.8	0.571899	-16.9	0.558594	-16.7	0.519531	-16.8	0.648438
-16.8	0.386719	-16.8	0.601563	-16.7	0.5625	-16.8	0.553894	-16.6	0.514832	-16.7	0.645309
-16.7	0.383591	-16.7	0.601563	-16.6	0.563293	-16.7	0.553894	-16.5	0.519531	-16.6	0.640625
-16.6	0.382034	-16.6	0.601563	-16.5	0.560181	-16.6	0.553894	-16.4	0.519531	-16.5	0.635941
-16.5	0.383591	-16.5	0.601563	-16.4	0.550781	-16.5	0.541382	-16.3	0.519531	-16.4	0.628906
-16.4	0.378906	-16.4	0.596863	-16.3	0.543762	-16.4	0.539063	-16.2	0.519531	-16.3	0.625778
-16.3	0.374222	-16.3	0.597656	-16.2	0.543762	-16.3	0.541382	-16.1	0.507813	-16.2	0.628906
-16.2	0.375778	-16.2	0.597656	-16.1	0.543762	-16.2	0.534363	-16	0.5047	-16.1	0.628906
-16.1	0.371094	-16.1	0.594543	-16	0.540649	-16.1	0.53125	-15.9	0.511719	-16	0.628906
-16	0.371094	-16	0.589844	-15.9	0.53595	-16	0.52655	-15.8	0.507019	-15.9	0.628906
-15.9	0.371094	-15.9	0.589844	-15.8	0.53125	-15.9	0.52655	-15.7	0.485168	-15.8	0.640625
-15.8	0.366409	-15.8	0.585144	-15.7	0.516418	-15.8	0.52655	-15.6	0.487488	-15.7	0.635941
-15.7	0.359375	-15.7	0.5672	-15.6	0.519531	-15.7	0.52655	-15.5	0.480469	-15.6	0.628906
-15.6	0.367188	-15.6	0.573425	-15.5	0.509399	-15.6	0.521851	-15.4	0.480469	-15.5	0.625778
-15.5	0.367188	-15.5	0.575012	-15.4	0.5047	-15.5	0.503113	-15.3	0.477356	-15.4	0.616409
-15.4	0.375778	-15.4	0.582031	-15.3	0.5	-15.4	0.503113	-15.2	0.472656	-15.3	0.617188
-15.3	0.366409	-15.3	0.582031	-15.2	0.492981	-15.3	0.503113	-15.1	0.472656	-15.2	0.609375
-15.2	0.367188	-15.2	0.582031	-15.1	0.489868	-15.2	0.5	-15	0.472656	-15.1	0.614059
-15.1	0.367188	-15.1	0.582031	-15	0.496887	-15.1	0.4953	-14.9	0.467957	-15	0.604691
-15	0.374222	-15	0.582031	-14.9	0.496887	-15	0.4953	-14.8	0.460938	-14.9	0.597656
-14.9	0.367188	-14.9	0.577332	-14.8	0.496887	-14.9	0.4953	-14.7	0.460938	-14.8	0.585159
-14.8	0.367188	-14.8	0.578125	-14.7	0.5	-14.8	0.490601	-14.6	0.457825	-14.7	0.582809
-14.7	0.364059	-14.7	0.578125	-14.6	0.485168	-14.7	0.483582	-14.5	0.456238	-14.6	0.578125
-14.6	0.362503	-14.6	0.586731	-14.5	0.482056	-14.6	0.4953	-14.4	0.449219	-14.5	0.573441
-14.5	0.355469	-14.5	0.582031	-14.4	0.477356	-14.5	0.4953	-14.3	0.460938	-14.4	0.555466
-14.4	0.352341	-14.4	0.582031	-14.3	0.472656	-14.4	0.4953	-14.2	0.456238	-14.3	0.550781
-14.3	0.347656	-14.3	0.582031	-14.2	0.462524	-14.3	0.503113	-14.1	0.449219	-14.2	0.546097
-14.2	0.347656	-14.2	0.596863	-14.1	0.457825	-14.2	0.503113	-14	0.446106	-14.1	0.539063
-14.1	0.347656	-14.1	0.589844	-14	0.453125	-14.1	0.5	-13.9	0.449219	-14	0.535934
-14	0.347656	-14	0.594543	-13.9	0.446106	-14	0.4953	-13.8	0.449219	-13.9	0.526566
-13.9	0.335159	-13.9	0.589844	-13.8	0.434387	-13.9	0.502319	-13.7	0.460938	-13.8	0.519531
-13.8	0.328125	-13.8	0.589844	-13.7	0.429688	-13.8	0.503113	-13.6	0.460938	-13.7	0.516403
-13.7	0.328125	-13.7	0.585144	-13.6	0.422668	-13.7	0.503113	-13.5	0.460938	-13.6	0.511719
-13.6	0.332809	-13.6	0.589844	-13.5	0.419556	-13.6	0.498413	-13.4	0.467957	-13.5	0.507034
-13.5	0.328125	-13.5	0.596863	-13.4	0.414856	-13.5	0.491394	-13.3	0.460938	-13.4	0.5
-13.4	0.323441	-13.4	0.594543	-13.3	0.414856	-13.4	0.488281	-13.2	0.465637	-13.3	0.483597
-13.3	0.328125	-13.3	0.601563	-13.2	0.414856	-13.3	0.483582	-13.1	0.467957	-13.2	0.473434
-13.2	0.324997	-13.2	0.609375	-13.1	0.414856	-13.2	0.478882	-13	0.46875	-13.1	0.46875
-13.1	0.327347	-13.1	0.609375	-13	0.410156	-13.1	0.46875	-12.9	0.46875	-13	0.464066
-13	0.315628	-13	0.616394	-12.9	0.403137	-13	0.46405	-12.8	0.46875	-12.9	0.453903
-12.9	0.308594	-12.9	0.606262	-12.8	0.400024	-12.9	0.459351	-12.7	0.46875	-12.8	0.449219
-12.8	0.305466	-12.8	0.601563	-12.7	0.395325	-12.8	0.452332	-12.6	0.465637	-12.7	0.456253
-12.7	0.296097	-12.7	0.609375	-12.6	0.395325	-12.7	0.449219	-12.5	0.472656	-12.6	0.449219
-12.6	0.293747	-12.6	0.604675	-12.5	0.390625	-12.6	0.451538	-12.4	0.467957	-12.5	0.441406
-12.5	0.276566	-12.5	0.609375	-12.4	0.395325	-12.5	0.444519	-12.3	0.460938	-12.4	0.429688
-12.4	0.274216	-12.4	0.606262	-12.3	0.395325	-12.4	0.441406	-12.2	0.457825	-12.3	0.425003
-12.3	0.264847	-12.3	0.601563	-12.2	0.395325	-12.3	0.436707	-12.1	0.453125	-12.2	0.414841
-12.2	0.266403	-12.2	0.613281	-12.1	0.392212	-12.2	0.439819	-12	0.448425	-12.1	0.410156
-12.1	0.257034	-12.1	0.608582	-12	0.387512	-12.1	0.444519	-11.9	0.441406	-12	0.410156
-12	0.245316	-12	0.601563	-11.9	0.371094	-12	0.444519	-11.8	0.436707	-11.9	0.410156
-11.9	0.238281	-11.9	0.606262	-11.8	0.359375	-11.9	0.439819	-11.7	0.4375	-11.8	0.398438
-11.8	0.223434	-11.8	0.596863	-11.7	0.352356	-11.8	0.429688	-11.6	0.4375	-11.7	0.393753
-11.7	0.214066	-11.7	0.589844	-11.6	0.349243	-11.7	0.424988	-11.5	0.434387	-11.6	0.386719
-11.6	0.207031	-11.6	0.585144	-11.5	0.344543	-11.6	0.420288	-11.4	0.424988	-11.5	0.386719
-11.5	0.215622	-11.5	0.575012	-11.4	0.344543	-11.5	0.421082	-11.3	0.414856	-11.4	0.383591
-11.4	0.206253	-11.4	0.577332	-11.3	0.356262	-11.4	0.421082	-11.2	0.410156	-11.3	0.378906
-11.3	0.199219	-11.3	0.570313	-11.2	0.356262	-11.3	0.421082	-11.1	0.405457	-11.2	0.385941
-11.2	0.194534	-11.2	0.575012	-11.1	0.356262	-11.2	0.417969	-11	0.398438	-11.1	0.386719
-11.1	0.195313	-11.1	0.570313	-11	0.359375	-11.1	0.413269	-10.9	0.395325	-11	0.398438
-11	0.192184	-11	0.577332	-10.9	0.352356	-11	0.408569	-10.8	0.390625	-10.9	0.395309
-10.9	0.1875	-10.9	0.5672	-10.8	0.360962	-10.9	0.413269	-10.7	0.385925	-10.8	0.385941
-10.8	0.182816	-10.8	0.5578	-10.7	0.356262	-10.8	0.410156	-10.6	0.378906	-10.7	0.378906
-10.7	0.172653	-10.7	0.550781	-10.6	0.356262	-10.7	0.400757	-10.5	0.378906	-10.6	0.387497
-10.6	0.179688	-10.6	0.546082	-10.5	0.356262	-10.6	0.393738	-10.4	0.382813	-10.5	0.378128
-10.5	0.163284	-10.5	0.546875	-10.4	0.356262	-10.5	0.389038	-10.3	0.371094	-10.4	0.378906
-10.4	0.15625	-10.4	0.555481	-10.3	0.359375	-10.4	0.378906	-10.2	0.363281	-10.3	0.374222
-10.3	0.148438	-10.3	0.553894	-10.2	0.352356	-10.3	0.374207	-10.1	0.351563	-10.2	0.367188
-10.2	0.153122	-10.2	0.558594	-10.1	0.364075	-10.2	0.374207	-10	0.354675	-10.1	0.364059
-10.1	0.140625	-10.1	0.558594	-10	0.360962	-10.1	0.369507	-9.9	0.344543	-10	0.359375
-10	0.143753	-10	0.575012	-9.9	0.363281	-10	0.362488	-9.8	0.339844	-9.9	0.359375
-9.9	0.128906	-9.9	0.570313	-9.8	0.356262	-9.9	0.371094	-9.7	0.339844	-9.8	0.354691
-9.8	0.133591	-9.8	0.589844	-9.7	0.364075	-9.8	0.366394	-9.6	0.346863	-9.7	0.347656
-9.7	0.124222	-9.7	0.585144	-9.6	0.353149	-9.7	0.366394	-9.5	0.339844	-9.6	0.359375
-9.6	0.117188	-9.6	0.589844	-9.5	0.34845	-9.6	0.361694	-9.4	0.339844	-9.5	0.367188
-9.5	0.112503	-9.5	0.594543	-9.4	0.351563	-9.5	0.342957	-9.3	0.339844	-9.4	0.367188
-9.4	0.114059	-9.4	0.589844	-9.3	0.332031	-9.4	0.339844	-9.2	0.347656	-9.3	0.367188
-9.3	0.104691	-9.3	0.596863	-9.2	0.332825	-9.3	0.335144	-9.1	0.344543	-9.2	0.367188
-9.2	0.0945282	-9.2	0.606262	-9.1	0.332825	-9.2	0.335144	-9	0.339844	-9.1	0.375778
-9.1	0.0898438	-9.1	0.608582	-9	0.341431	-9.1	0.330444	-8.9	0.351563	-9	0.378906
-9	0.0929718	-9	0.601563	-8.9	0.336731	-9	0.320313	-8.8	0.346863	-8.9	0.390625
-8.9	0.0859375	-8.9	0.604675	-8.8	0.344543	-8.9	0.310913	-8.7	0.339844	-8.8	0.390625
-8.8	0.0828094	-8.8	0.594543	-8.7	0.344543	-8.8	0.299194	-8.6	0.336731	-8.7	0.393753
-8.7	0.0898438	-8.7	0.59375	-8.6	0.356262	-8.7	0.289063	-8.5	0.332031	-8.6	0.386719
-8.6	0.0851593	-8.6	0.577332	-8.5	0.356262	-8.6	0.284363	-8.4	0.332031	-8.5	0.395309
-8.5	0.078125	-8.5	0.570313	-8.4	0.351563	-8.5	0.279663	-8.3	0.327332	-8.4	0.402344
-8.4	0.078125	-8.4	0.570313	-8.3	0.341431	-8.4	0.257813	-8.2	0.332031	-8.3	0.405472
-8.3	0.0749969	-8.3	0.558594	-8.2	0.339844	-8.3	0.248413	-8.1	0.327332	-8.2	0.398438
-8.2	0.0656281	-8.2	0.5625	-8.1	0.325012	-8.2	0.241394	-8	0.3172	-8.1	0.410156
-8.1	0.0585938	-8.1	0.558594	-8	0.3172	-8.1	0.241394	-7.9	0.3125	-8	0.410156
-8	0.0539093	-8	0.553894	-7.9	0.305481	-8	0.241394	-7.8	0.3125	-7.9	0.410156
-7.9	0.046875	-7.9	0.555481	-7.8	0.302368	-7.9	0.241394	-7.7	0.315613	-7.8	0.410156
-7.8	0.0437469	-7.8	0.546082	-7.7	0.292969	-7.8	0.230469	-7.6	0.305481	-7.7	0.417969
-7.7	0.0390625	-7.7	0.53595	-7.6	0.28125	-7.7	0.221069	-7.5	0.300781	-7.6	0.417969
-7.6	0.0390625	-7.6	0.538269	-7.5	0.271118	-7.6	0.210938	-7.4	0.296082	-7.5	0.414841
-7.5	0.0343781	-7.5	0.539063	-7.4	0.269531	-7.5	0.201538	-7.3	0.289063	-7.4	0.405472
-7.4	0.0242157	-7.4	0.550781	-7.3	0.259399	-7.4	0.189819	-7.2	0.289063	-7.3	0.393753
-7.3	0.03125	-7.3	0.555481	-7.2	0.2547	-7.3	0.179688	-7.1	0.28595	-7.2	0.395309
-7.2	0.0265656	-7.2	0.546082	-7.1	0.25	-7.2	0.174988	-7	0.27655	-7.1	0.385941
-7.1	0.0273438	-7.1	0.550781	-7	0.242981	-7.1	0.170288	-6.9	0.269531	-7	0.375778
-7	0.0242157	-7	0.550781	-6.9	0.239868	-7	0.160156	-6.8	0.264832	-6.9	0.371094
-6.9	0.0148468	-6.9	0.546082	-6.8	0.242188	-6.9	0.163269	-6.7	0.2547	-6.8	0.371094
-6.8	0.0078125	-6.8	0.53125	-6.7	0.215637	-6.8	0.158569	-6.6	0.25	-6.7	0.374222
-6.7	0	-6.7	0.527344	-6.6	0.199219	-6.7	0.148438	-6.5	0.2453	-6.6	0.364059
-6.6	-0.0117188	-6.6	0.524231	-6.5	0.1922	-6.6	0.139038	-6.4	0.227356	-6.5	0.366409
-6.5	-0.0164032	-6.5	0.514832	-6.4	0.189087	-6.5	0.139038	-6.3	0.222656	-6.4	0.359375
-6.4	-0.0265656	-6.4	0.511719	-6.3	0.179688	-6.4	0.128906	-6.2	0.222656	-6.3	0.354691
-6.3	-0.0242157	-6.3	0.4953	-6.2	0.157043	-6.3	0.124207	-6.1	0.217957	-6.2	0.344528
-6.2	-0.0343781	-6.2	0.485168	-6.1	0.145325	-6.2	0.124207	-6	0.199219	-6.1	0.342972
-6.1	-0.0437469	-6.1	0.472656	-6	0.137512	-6.1	0.131226	-5.9	0.199219	-6	0.335938
-6	-0.0507813	-6	0.472656	-5.9	0.121094	-6	0.112488	-5.8	0.196106	-5.9	0.332809
-5.9	-0.0539093	-5.9	0.467957	-5.8	0.106262	-5.9	0.112488	-5.7	0.191406	-5.8	0.328125
-5.8	-0.0632782	-5.8	0.453125	-5.7	0.0914307	-5.8	0.124207	-5.6	0.191406	-5.7	0.323441
-5.7	-0.0820313	-5.7	0.433594	-5.6	0.0820313	-5.7	0.121094	-5.5	0.186707	-5.6	0.308594
-5.6	-0.0749969	-5.6	0.421875	-5.5	0.0797119	-5.6	0.111694	-5.4	0.179688	-5.5	0.296875
-5.5	-0.0820313	-5.5	0.405457	-5.4	0.0703125	-5.5	0.104675	-5.3	0.191406	-5.4	0.293747
-5.4	-0.0851593	-5.4	0.395325	-5.3	0.0601807	-5.4	0.101563	-5.2	0.191406	-5.3	0.284378
-5.3	-0.0898438	-5.3	0.382813	-5.2	0.055481	-5.3	0.0921631	-5.1	0.179688	-5.2	0.272659
-5.2	-0.0898438	-5.2	0.366394	-5.1	0.055481	-5.2	0.085144	-5	0.176575	-5.1	0.262497
-5.1	-0.0820313	-5.1	0.354675	-5	0.0625	-5.1	0.0898438	-4.9	0.171875	-5	0.253128
-5	-0.0820313	-5	0.339844	-4.9	0.0437622	-5	0.085144	-4.8	0.171875	-4.9	0.242966
-4.9	-0.0820313	-4.9	0.3172	-4.8	0.0437622	-4.9	0.085144	-4.7	0.167175	-4.8	0.233597
-4.8	-0.0820313	-4.8	0.3078	-4.7	0.0437622	-4.8	0.0804443	-4.6	0.160156	-4.7	0.223434
-4.7	-0.0820313	-4.7	0.297668	-4.6	0.0507813	-4.7	0.0734253	-4.5	0.155457	-4.6	0.214066
-4.6	-0.0820313	-4.6	0.27655	-4.5	0.0320435	-4.6	0.0687256	-4.4	0.145325	-4.5	0.203903
-4.5	-0.0671844	-4.5	0.261719	-4.4	0.0406494	-4.5	0.0585938	-4.3	0.135925	-4.4	0.194534
-4.4	-0.0625	-4.4	0.25	-4.3	0.0359497	-4.4	0.053894	-4.2	0.128906	-4.3	0.182816
-4.3	-0.0625	-4.3	0.233582	-4.2	0.0359497	-4.3	0.053894	-4.1	0.125793	-4.2	0.172653
-4.2	-0.0656281	-4.2	0.22345	-4.1	0.0359497	-4.2	0.053894	-4	0.121094	-4.1	0.152344
-4.1	-0.0703125	-4.1	0.21875	-4	0.03125	-4.1	0.053894	-3.9	0.121094	-4	0.140625
-4	-0.0703125	-4	0.206238	-3.9	0.0328369	-4	0.0491943	-3.8	0.121094	-3.9	0.135941
-3.9	-0.0703125	-3.9	0.196106	-3.8	0.0281372	-3.9	0.0421753	-3.7	0.121094	-3.8	0.128906
-3.8	-0.0625	-3.8	0.191406	-3.7	0.0359497	-3.8	0.0507813	-3.6	0.121094	-3.7	0.125778
-3.7	-0.0625	-3.7	0.179688	-3.6	0.0359497	-3.7	0.0413818	-3.5	0.121094	-3.6	0.121094
-3.6	-0.0625	-3.6	0.174988	-3.5	0.0359497	-3.6	0.0343628	-3.4	0.121094	-3.5	0.121094
-3.5	-0.0507813	-3.5	0.160156	-3.4	0.0476685	-3.5	0.0343628	-3.3	0.116394	-3.4	0.116409
-3.4	-0.0507813	-3.4	0.157043	-3.3	0.0476685	-3.4	0.0343628	-3.2	0.121094	-3.3	0.109375
-3.3	-0.0554657	-3.3	0.135925	-3.2	0.0476685	-3.3	0.0390625	-3.1	0.121094	-3.2	0.109375
-3.2	-0.0546875	-3.2	0.121094	-3.1	0.0507813	-3.2	0.0343628	-3	0.106262	-3.1	0.109375
-3.1	-0.0546875	-3.1	0.121094	-3	0.0437622	-3.1	0.0218506	-2.9	0.108582	-3	0.0929718
-3	-0.0546875	-3	0.109375	-2.9	0.0406494	-3	0.022644	-2.8	0.0898438	-2.9	0.0859375
-2.9	-0.0546875	-2.9	0.109375	-2.8	0.03125	-2.9	0.022644	-2.7	0.086731	-2.8	0.0828094
-2.8	-0.0429688	-2.8	0.0984497	-2.7	0.0359497	-2.8	0.0343628	-2.6	0.0820313	-2.7	0.0898438
-2.7	-0.0429688	-2.7	0.0734253	-2.6	0.0359497	-2.7	0.0343628	-2.5	0.0820313	-2.6	0.0898438
-2.6	-0.03125	-2.6	0.0671997	-2.5	0.03125	-2.6	0.0343628	-2.4	0.0773315	-2.5	0.0898438
-2.5	-0.03125	-2.5	0.0507813	-2.4	0.024231	-2.5	0.0343628	-2.3	0.0703125	-2.4	0.0851593
-2.4	-0.0234375	-2.4	0.03125	-2.3	0.0320435	-2.4	0.0343628	-2.2	0.0656128	-2.3	0.078125
-2.3	-0.0234375	-2.3	0.03125	-2.2	0.0289307	-2.3	0.03125	-2.1	0.0437622	-2.2	0.078125
-2.2	-0.0234375	-2.2	0.0234375	-2.1	0.024231	-2.2	0.0265503	-2	0.0390625	-2.1	0.0749969
-2.1	-0.0117188	-2.1	0.0148315	-2	0.0359497	-2.1	0.0265503	-1.9	0.0507813	-2	0.0703125
-2	-0.0148468	-2	0.0195313	-1.9	0.03125	-2	0.0343628	-1.8	0.0507813	-1.9	0.0656281
-1.9	-0.0195313	-1.9	0.0078125	-1.8	0.0211182	-1.9	0.0343628	-1.7	0.0507813	-1.8	0.0585938
-1.8	-0.0242157	-1.8	0	-1.7	0.024231	-1.8	0.0343628	-1.6	0.0507813	-1.7	0.0585938
-1.7	-0.0234375	-1.7	0.00469971	-1.6	0.024231	-1.7	0.0460815	-1.5	0.0625	-1.6	0.0585938
-1.6	-0.0234375	-1.6	0	-1.5	0.0195313	-1.6	0.0460815	-1.4	0.0703125	-1.5	0.0554657
-1.5	-0.0234375	-1.5	0	-1.4	0.0172119	-1.5	0.0460815	-1.3	0.0656128	-1.4	0.0421906
-1.4	-0.0117188	-1.4	-0.0078125	-1.3	0.0359497	-1.4	0.0491943	-1.2	0.055481	-1.3	0.046875
-1.3	-0.0117188	-1.3	-0.0164185	-1.2	0.0359497	-1.3	0.0421753	-1.1	0.0507813	-1.2	0.0437469
-1.2	-0.0117188	-1.2	-0.0117188	-1.1	0.0429688	-1.2	0.0421753	-1	0.0578003	-1.1	0.0390625
-1.1	-0.0117188	-1.1	-0.0195313	-1	0.0359497	-1.1	0.0374756	-0.899998	0.0390625	-1	0.0343781
-1	-0.0117188	-1	-0.0265503	-0.900002	0.0359497	-1	0.0304565	-0.799999	0.0359497	-0.900002	0.0273438
-0.899998	-0.0070343	-0.899998	-0.0195313	-0.799999	0.0406494	-0.899998	0.0304565	-0.699997	0.038269	-0.799999	0.0273438
-0.799999	0	-0.799999	-0.0195313	-0.700001	0.0359497	-0.799999	0.0304565	-0.599998	0.03125	-0.700001	0.0242157
-0.700001	0	-0.700001	-0.0273438	-0.600002	0.0359497	-0.700001	0.022644	-0.5	0.0265503	-0.600002	0.0195313
-0.599998	-0.00468445	-0.599998	-0.024231	-0.5	0.03125	-0.599998	0.0195313	-0.399998	0.0195313	-0.5	0.0195313
-0.5	-0.0117188	-0.5	-0.0195313	-0.400002	0.024231	-0.5	0.022644	-0.299999	0.0195313	-0.400002	0.0195313
-0.399998	-0.0117188	-0.399998	-0.0148315	-0.299999	0.024231	-0.399998	0.0179443	-0.199997	0.0195313	-0.299999	0.0117188
-0.299999	0	-0.299999	-0.0195313	-0.200001	0.0211182	-0.299999	0.00311279	-0.0999985	0.0164185	-0.200001	0.0070343
-0.200001	-0.00312805	-0.200001	-0.0164185	-0.100002	0.0117188	-0.200001	0.00311279	0	0	-0.100002	0
-0.0999985	-0.0078125	-0.0999985	-0.00701904	0	-2.27374E-13	-0.0999985	0.00311279	0.100002	0	0	0
0	0	0	0	0.0999985	0.00158691	0	2.27374E-13	0.200001	-0.00469971	0.0999985	-0.00468445
0.100002	-0.00468445	0.100002	0.00469971	0.200001	-0.00311279	0.100002	-0.00469971	0.300003	-0.0148315	0.200001	-0.0234375
0.200001	-0.0117188	0.200001	0.0265503	0.299999	-0.00311279	0.200001	-0.00469971	0.400002	-0.0195313	0.299999	-0.0234375
0.299999	-0.0117188	0.299999	0.03125	0.399998	-0.00311279	0.299999	-0.00469971	0.5	-0.00469971	0.399998	-0.0265656
0.400002	-0.0117188	0.400002	0.024231	0.5	-0.0078125	0.400002	-0.0164185	0.600002	-0.0148315	0.5	-0.03125
0.5	0	0.5	0.0265503	0.599998	-0.0101318	0.5	-0.0164185	0.700001	-0.0195313	0.599998	-0.0195313
0.600002	0	0.600002	0.024231	0.700001	-0.0148315	0.600002	-0.0164185	0.800003	-0.024231	0.700001	-0.0195313
0.700001	-0.00468445	0.700001	0.0460815	0.799999	-0.0148315	0.700001	-0.0211182	0.900002	-0.0390625	0.799999	-0.0195313
0.799999	-0.00390625	0.799999	0.0390625	0.899998	-0.0148315	0.799999	-0.0281372	1	-0.0507813	0.899998	-0.0195313
0.900002	-0.0070343	0.900002	0.0437622	1	-0.019516	0.900002	-0.0359497	1.1	-0.053894	1	-0.0195313
1	-0.0117188	1	0.0507813	1.1	-0.0265503	1	-0.03125	1.2	-0.0632935	1.1	-0.0195313
1.1	-0.0164032	1.1	0.0507813	1.2	-0.0265503	1.1	-0.0359497	1.3	-0.0820313	1.2	-0.0195313
1.2	-0.0265656	1.2	0.053894	1.3	-0.0296783	1.2	-0.0437622	1.4	-0.0820313	1.3	-0.0195313
1.3	-0.03125	1.3	0.0585938	1.4	-0.0343628	1.3	-0.0484619	1.5	-0.0898438	1.4	-0.0195313
1.4	-0.03125	1.4	0.046875	1.5	-0.0390472	1.4	-0.055481	1.6	-0.0898438	1.5	-0.0195313
1.5	-0.0242157	1.5	0.046875	1.6	-0.0460815	1.5	-0.055481	1.7	-0.104675	1.6	-0.0195313
1.6	-0.0429688	1.6	0.0437622	1.7	-0.0460815	1.6	-0.0671997	1.8	-0.117188	1.7	-0.0195313
1.7	-0.0507813	1.7	0.0390625	1.8	-0.0492096	1.7	-0.0671997	1.9	-0.128906	1.8	-0.0117188
1.8	-0.0539093	1.8	0.0390625	1.9	-0.053894	1.8	-0.0671997	2	-0.128906	1.9	-0.0117188
1.9	-0.0703125	1.9	0.0507813	2	-0.053894	1.9	-0.0718994	2.1	-0.133606	2	-0.0117188
2	-0.0703125	2	0.0507813	2.1	-0.0617065	2	-0.0789185	2.2	-0.148438	2.1	0
2.1	-0.0749969	2.1	0.0390625	2.2	-0.0617065	2.1	-0.0742188	2.3	-0.143738	2.2	-0.00468445
2.2	-0.0820313	2.2	0.053894	2.3	-0.0617065	2.2	-0.0797119	2.4	-0.133606	2.3	-0.0117188
2.3	-0.0898438	2.3	0.055481	2.4	-0.066391	2.3	-0.086731	2.5	-0.140625	2.4	-0.0117188
2.4	-0.101563	2.4	0.0507813	2.5	-0.0656128	2.4	-0.086731	2.6	-0.140625	2.5	-0.0148468
2.5	-0.106247	2.5	0.0507813	2.6	-0.0656128	2.5	-0.086731	2.7	-0.140625	2.6	-0.0117188
2.6	-0.113281	2.6	0.0507813	2.7	-0.0702972	2.6	-0.0984497	2.8	-0.143738	2.7	-0.0117188
2.7	-0.125	2.7	0.0625	2.8	-0.0804596	2.7	-0.0984497	2.9	-0.136719	2.8	0
2.8	-0.125	2.8	0.0625	2.9	-0.085144	2.8	-0.0984497	3	-0.148438	2.9	0
2.9	-0.132813	2.9	0.0703125	3	-0.085144	2.9	-0.0984497	3.1	-0.148438	3	-0.0117188
3	-0.135941	3	0.0703125	3.1	-0.085144	3	-0.0984497	3.2	-0.148438	3.1	-0.0117188
3.1	-0.140625	3.1	0.0703125	3.2	-0.085144	3.1	-0.106262	3.3	-0.160156	3.2	-0.0164032
3.2	-0.152344	3.2	0.0656128	3.3	-0.085144	3.2	-0.101563	3.4	-0.160156	3.3	-0.03125
3.3	-0.152344	3.3	0.0585938	3.4	-0.085144	3.3	-0.110962	3.5	-0.164856	3.4	-0.03125
3.4	-0.152344	3.4	0.0507813	3.5	-0.0929565	3.4	-0.117981	3.6	-0.160156	3.5	-0.0234375
3.5	-0.160156	3.5	0.0507813	3.6	-0.0929565	3.5	-0.121094	3.7	-0.160156	3.6	-0.0234375
3.6	-0.160156	3.6	0.0507813	3.7	-0.0929565	3.6	-0.125793	3.8	-0.167175	3.7	-0.0234375
3.7	-0.171875	3.7	0.0507813	3.8	-0.0929565	3.7	-0.137512	3.9	-0.160156	3.8	-0.0234375
3.8	-0.171875	3.8	0.0476685	3.9	-0.0929565	3.8	-0.137512	4	-0.164856	3.9	-0.0234375
3.9	-0.179688	3.9	0.0507813	4	-0.0929565	3.9	-0.145325	4.1	-0.160156	4	-0.0234375
4	-0.179688	4	0.0507813	4.1	-0.10936	4	-0.145325	4.2	-0.167175	4.1	-0.0265656
4.1	-0.191406	4.1	0.0507813	4.2	-0.116394	4.1	-0.157043	4.3	-0.160156	4.2	-0.0195313
4.2	-0.203125	4.2	0.0507813	4.3	-0.104675	4.2	-0.157043	4.4	-0.179688	4.3	-0.0195313
4.3	-0.210938	4.3	0.0507813	4.4	-0.107803	4.3	-0.169556	4.5	-0.199219	4.4	-0.0124969
4.4	-0.230469	4.4	0.03125	4.5	-0.124207	4.4	-0.188293	4.6	-0.210938	4.5	-0.0117188
4.5	-0.230469	4.5	0.03125	4.6	-0.124207	4.5	-0.188293	4.7	-0.215637	4.6	-0.0117188
4.6	-0.25	4.6	0.0195313	4.7	-0.124207	4.6	-0.176575	4.8	-0.222656	4.7	-0.0148468
4.7	-0.261719	4.7	0.0117188	4.8	-0.124207	4.7	-0.188293	4.9	-0.225769	4.8	-0.0273438
4.8	-0.28125	4.8	0.0117188	4.9	-0.128891	4.8	-0.207825	5	-0.230469	4.9	-0.0273438
4.9	-0.292969	4.9	-0.00469971	5	-0.135925	4.9	-0.227356	5.1	-0.238281	5	-0.0554657
5	-0.300781	5	-0.0117188	5.1	-0.158585	5	-0.25	5.2	-0.25	5.1	-0.0820313
5.1	-0.320313	5.1	-0.0195313	5.2	-0.174988	5.1	-0.266418	5.3	-0.261719	5.2	-0.0898438
5.2	-0.339844	5.2	-0.0343628	5.3	-0.1828	5.2	-0.293762	5.4	-0.257019	5.3	-0.104691
5.3	-0.351563	5.3	-0.0390625	5.4	-0.194519	5.3	-0.293762	5.5	-0.257813	5.4	-0.109375
5.4	-0.351563	5.4	-0.0515747	5.5	-0.21405	5.4	-0.305481	5.6	-0.269531	5.5	-0.128906
5.5	-0.356247	5.5	-0.0703125	5.6	-0.233582	5.5	-0.329712	5.7	-0.274231	5.6	-0.148438
5.6	-0.363281	5.6	-0.0703125	5.7	-0.238266	5.6	-0.356262	5.8	-0.269531	5.7	-0.167969
5.7	-0.382813	5.7	-0.0898438	5.8	-0.253113	5.7	-0.367981	5.9	-0.28125	5.8	-0.1875
5.8	-0.389847	5.8	-0.0945435	5.9	-0.264832	5.8	-0.387512	6	-0.289063	5.9	-0.207031
5.9	-0.390625	5.9	-0.108582	6	-0.289047	5.9	-0.395325	6.1	-0.308594	6	-0.21875
6	-0.402344	6	-0.109375	6.1	-0.315613	6	-0.418762	6.2	-0.315613	6.1	-0.238281
6.1	-0.410156	6.1	-0.121094	6.2	-0.327332	6.1	-0.438293	6.3	-0.328125	6.2	-0.257813
6.2	-0.421875	6.2	-0.121094	6.3	-0.349991	6.2	-0.446106	6.4	-0.344543	6.3	-0.277344
6.3	-0.433594	6.3	-0.125793	6.4	-0.366394	6.3	-0.457825	6.5	-0.354675	6.4	-0.308594
6.4	-0.453125	6.4	-0.152344	6.5	-0.385925	6.4	-0.485168	6.6	-0.375793	6.5	-0.328125
6.5	-0.467972	6.5	-0.155457	6.6	-0.405457	6.5	-0.496887	6.7	-0.390625	6.6	-0.359375
6.6	-0.480469	6.6	-0.179688	6.7	-0.424988	6.6	-0.516418	6.8	-0.410156	6.7	-0.390625
6.7	-0.485153	6.7	-0.191406	6.8	-0.444519	6.7	-0.53595	6.9	-0.4328	6.8	-0.407028
6.8	-0.492188	6.8	-0.191406	6.9	-0.449203	6.8	-0.547668	7	-0.465637	6.9	-0.425003
6.9	-0.511719	6.9	-0.203918	7	-0.475769	6.9	-0.578918	7.1	-0.480469	7	-0.453903
7	-0.523438	7	-0.210938	7.1	-0.487488	7	-0.59845	7.2	-0.4953	7.1	-0.492188
7.1	-0.53125	7.1	-0.222656	7.2	-0.507019	7.1	-0.617981	7.3	-0.492981	7.2	-0.5
7.2	-0.542969	7.2	-0.230469	7.3	-0.514832	7.2	-0.625793	7.4	-0.514832	7.3	-0.511719
7.3	-0.557816	7.3	-0.233582	7.4	-0.537491	7.3	-0.648438	7.5	-0.519531	7.4	-0.519531
7.4	-0.558594	7.4	-0.238281	7.5	-0.542175	7.4	-0.650024	7.6	-0.539063	7.5	-0.53125
7.5	-0.570313	7.5	-0.238281	7.6	-0.553894	7.5	-0.657043	7.7	-0.539063	7.6	-0.53125
7.6	-0.578903	7.6	-0.238281	7.7	-0.570297	7.6	-0.668762	7.8	-0.550781	7.7	-0.53125
7.7	-0.585159	7.7	-0.25	7.8	-0.585144	7.7	-0.657043	7.9	-0.555481	7.8	-0.535934
7.8	-0.601563	7.8	-0.25	7.9	-0.585144	7.8	-0.637512	8	-0.5625	7.9	-0.53125
7.9	-0.598434	7.9	-0.262512	8	-0.585144	7.9	-0.625793	8.1	-0.550781	8	-0.523438
8	-0.59375	8	-0.269531	8.1	-0.585144	8	-0.617981	8.2	-0.550781	8.1	-0.511719
8.1	-0.59375	8.1	-0.269531	8.2	-0.577332	8.1	-0.601563	8.3	-0.550781	8.2	-0.487503
8.2	-0.577347	8.2	-0.269531	8.3	-0.577332	8.2	-0.575012	8.4	-0.546082	8.3	-0.46875
8.3	-0.570313	8.3	-0.269531	8.4	-0.565613	8.3	-0.5672	8.5	-0.539063	8.4	-0.460938
8.4	-0.5625	8.4	-0.261719	8.5	-0.565613	8.4	-0.555481	8.6	-0.539063	8.5	-0.449219
8.5	-0.550781	8.5	-0.261719	8.6	-0.565613	8.5	-0.543762	8.7	-0.53125	8.6	-0.446091
8.6	-0.539063	8.6	-0.261719	8.7	-0.546082	8.6	-0.543762	8.8	-0.53125	8.7	-0.441406
8.7	-0.53125	8.7	-0.261719	8.8	-0.546082	8.7	-0.53595	8.9	-0.524231	8.8	-0.433594
8.8	-0.519531	8.8	-0.25	8.9	-0.534363	8.8	-0.524231	9	-0.514832	8.9	-0.425003
8.9	-0.511719	8.9	-0.253113	9	-0.534363	8.9	-0.524231	9.1	-0.507813	9	-0.421875
9	-0.511719	9	-0.257813	9.1	-0.529678	9	-0.516418	9.2	-0.5	9.1	-0.421875
9.1	-0.511719	9.1	-0.25	9.2	-0.522644	9.1	-0.509399	9.3	-0.5	9.2	-0.410156
9.2	-0.5	9.2	-0.25	9.3	-0.514832	9.2	-0.508606	9.4	-0.5	9.3	-0.395309
9.3	-0.5	9.3	-0.242981	9.4	-0.507797	9.3	-0.496887	9.5	-0.5	9.4	-0.382813
9.4	-0.485153	9.4	-0.242188	9.5	-0.4953	9.4	-0.485168	9.6	-0.480469	9.5	-0.371094
9.5	-0.472656	9.5	-0.230469	9.6	-0.483582	9.5	-0.472656	9.7	-0.46875	9.6	-0.351563
9.6	-0.453125	9.6	-0.21875	9.7	-0.478897	9.6	-0.446106	9.8	-0.460938	9.7	-0.320313
9.7	-0.433594	9.7	-0.210938	9.8	-0.46405	9.7	-0.431274	9.9	-0.429688	9.8	-0.3125
9.8	-0.421875	9.8	-0.191406	9.9	-0.471863	9.8	-0.414063	10	-0.410156	9.9	-0.292969
9.9	-0.402344	9.9	-0.171875	10	-0.452332	9.9	-0.395325	10.1	-0.398438	10	-0.276566
10	-0.389847	10	-0.174988	10.1	-0.452332	10	-0.375793	10.2	-0.385925	10.1	-0.269531
10.1	-0.359375	10.1	-0.16095	10.2	-0.449203	10.1	-0.380493	10.3	-0.383606	10.2	-0.261719
10.2	-0.359375	10.2	-0.155457	10.3	-0.459366	10.2	-0.387512	10.4	-0.378906	10.3	-0.25
10.3	-0.351563	10.3	-0.153137	10.4	-0.444519	10.3	-0.390625	10.5	-0.354675	10.4	-0.266403
10.4	-0.356247	10.4	-0.160156	10.5	-0.4328	10.4	-0.407043	10.6	-0.308594	10.5	-0.273438
10.5	-0.34375	10.5	-0.140625	10.6	-0.429672	10.5	-0.395325	10.7	-0.293762	10.6	-0.245316
10.6	-0.34375	10.6	-0.124207	10.7	-0.444519	10.6	-0.392212	10.8	-0.25	10.7	-0.230469
10.7	-0.346878	10.7	-0.121887	10.8	-0.456238	10.7	-0.387512	10.9	-0.238281	10.8	-0.230469
10.8	-0.339844	10.8	-0.128906	10.9	-0.439835	10.8	-0.371094	11	-0.238281	10.9	-0.230469
10.9	-0.344528	10.9	-0.114075	11	-0.452332	10.9	-0.349243	11.1	-0.210938	11	-0.235153
11	-0.351563	11	-0.116394	11.1	-0.46405	11	-0.34845	11.2	-0.186707	11.1	-0.233597
11.1	-0.351563	11.1	-0.0703125	11.2	-0.476547	11.1	-0.332031	11.3	-0.109375	11.2	-0.235153
11.2	-0.351563	11.2	-0.03125	11.3	-0.514832	11.2	-0.3172	11.4	-0.148438	11.3	-0.210938
11.3	-0.339844	11.3	0.0195313	11.4	-0.475769	11.3	-0.333618	11.5	-0.133606	11.4	-0.261719
11.4	-0.356247	11.4	-0.0507813	11.5	-0.534363	11.4	-0.273438	11.6	0.03125	11.5	-0.272659
11.5	-0.414063	11.5	-0.0507813	11.6	-0.585144	11.5	-0.302368	11.7	-0.296082	11.6	-0.407806
11.6	-0.453125	11.6	-0.215637	11.7	-0.823425	11.6	-0.399231	11.8	-0.524231	11.7	-0.8125
11.7	-0.804688	11.7	-0.25	11.8	-1.54686	11.7	-0.828918	11.9	-1.12421	11.8	-1.27266
11.8	-1.55078	11.8	-0.905457	11.9	-2.58514	11.8	-1.59454	12	-1.92267	11.9	-2.12187
11.9	-2.36328	11.9	-2.14532	12	-3.86952	11.9	-2.51642	12.1	-1.76483	12	-2.05391
12	-3.44141	12	-3.00311	12.1	-4.42577	12	-3.13361	12.2	0.706238	12.1	0.557816
12.1	-3.05469	12.1	-2.92969	12.2	-3.55389	12.1	-2.13751	12.3	6.87891	12.2	6.82343
12.2	-0.596878	12.2	-1.0047	12.3	-1.22264	12.2	0.535156	12.4	16.3203	12.3	17.0352
12.3	3.98047	12.3	3.53906	12.4	2.33362	12.3	5.4328	12.5	28.375	12.4	29.7
12.4	10.9187	12.4	9.61719	12.5	6.70938	12.4	12.1836	12.6	41.7031	12.5	44.1242
12.5	19.2836	12.5	17.1625	12.6	11.9688	12.5	20.7398	12.7	56.5055	12.6	59.4695
12.6	29.1273	12.6	26.1766	12.7	17.7766	12.6	31.0562	12.8	71.9047	12.7	75.9742
12.7	40.3766	12.7	36	12.8	24.4758	12.7	42.7219	12.9	88.4531	12.8	93.5203
12.8	53.025	12.8	46.7695	12.9	32.0867	12.8	56.2695	13	105.748	12.9	112.237
12.9	67.3656	12.9	58.8453	13	39.9023	12.9	71.4836	13.1	122.01	13	130.339
13	81.8211	13	71.2469	13.1	44.2016	13	87.6375	13.2	130.905	13.1	141.755
13.1	93.5688	13.1	80.1836	13.2	42.5531	13.1	103.165	13.3	128.86	13.2	142.67
13.2	100.537	13.2	83.5844	13.3	36.8055	13.2	116.677	13.4	120.413	13.3	136.834
13.3	104.332	13.3	82.5828	13.4	30.2141	13.3	127.359	13.5	112.514	13.4	130.22
13.4	106.611	13.4	79.168	13.5	23.7039	13.4	134.982	13.6	106.639	13.5	125.179
13.5	107.594	13.5	75.093	13.6	17.618	13.5	139.674	13.7	102.159	13.6	120.583
13.6	107.289	13.6	69.9594	13.7	11.85	13.6	141.877	13.8	98.5297	13.7	116.572
13.7	105.74	13.7	63.8383	13.8	6.43283	13.7	142.051	13.9	94.7461	13.8	112.793
13.8	102.719	13.8	56.9906	13.9	1.04456	13.8	140.832	14	91.5797	13.9	108.329
13.9	98.4953	13.9	49.9172	14	-3.4164	13.9	138.797	14.1	88.1469	14	103.964
14	94.1969	14	42.7219	14.1	-7.81248	14	135.887	14.2	84.9344	14.1	99.4281
14.1	89.307	14.1	35.6547	14.2	-11.4469	14.1	132.587	14.3	81.5258	14.2	94.7375
14.2	84.3664	14.2	29.0766	14.3	-14.4609	14.2	128.967	14.4	78.4719	14.3	90.418
14.3	79.3641	14.3	22.7875	14.4	-16.9828	14.3	125.425	14.5	75.2836	14.4	86.2195
14.4	74.8602	14.4	17.1656	14.5	-19.1601	14.4	121.834	14.6	72.0703	14.5	82.4195
14.5	70.1531	14.5	12.3289	14.6	-20.8344	14.5	118.409	14.7	69.0938	14.6	78.6508
14.6	65.8508	14.6	7.61954	14.7	-22.3859	14.6	115.277	14.8	65.9805	14.7	75.1156
14.7	61.4422	14.7	3.74454	14.8	-23.7969	14.7	112.237	14.9	63.3242	14.8	72.4789
14.8	57.4328	14.8	0.130463	14.9	-24.9523	14.8	109.803	15	60.6195	14.9	69.4977
14.9	53.6227	14.9	-3.03516	15	-25.8508	14.9	107.817	15.1	58.0438	15	67.3227
15	50.0086	15	-5.79141	15.1	-26.4664	15	106.32	15.2	55.6242	15.1	65.2508
15.1	46.2242	15.1	-8.09064	15.2	-26.9773	15.1	105.373	15.3	53.3711	15.2	63.4828
15.2	42.9336	15.2	-10.2625	15.3	-27.3383	15.2	104.979	15.4	51.2539	15.3	62.3828
15.3	39.5367	15.3	-12.1891	15.4	-27.7101	15.3	105.154	15.5	49.3109	15.4	61.5898
15.4	36.5453	15.4	-13.7664	15.5	-28.1305	15.4	105.938	15.6	47.3016	15.5	61.2344
15.5	33.7047	15.5	-14.9937	15.6	-28.3851	15.5	107.333	15.7	45.8914	15.6	61.1422
15.6	30.9187	15.6	-16.3461	15.7	-28.3992	15.6	109.22	15.8	44.1891	15.7	61.7101
15.7	28.7672	15.7	-17.2859	15.8	-28.282	15.7	111.793	15.9	42.9312	15.8	62.4758
15.8	26.4641	15.8	-17.925	15.9	-28.5703	15.8	115.002	16	41.8656	15.9	63.6086
15.9	24.5797	15.9	-18.8086	16	-28.6976	15.9	119.195	16.1	40.9961	16	65.2867
16	22.8852	16	-19.5055	16.1	-28.6937	16	123.845	16.2	40.1672	16.1	66.975
16.1	21.3102	16.1	-19.9859	16.2	-28.682	16.1	129.19	16.3	39.8008	16.2	68.7656
16.2	20.1625	16.2	-20.2844	16.3	-28.6391	16.2	135.3	16.4	39.1758	16.3	71.2195
16.3	18.925	16.3	-20.6039	16.4	-28.5555	16.3	141.948	16.5	38.7899	16.4	73.6328
16.4	18.1445	16.4	-20.7969	16.5	-28.418	16.4	149.208	16.6	38.6867	16.5	75.9648
16.5	17.4281	16.5	-21.1328	16.6	-28.2812	16.5	157.405	16.7	38.725	16.6	78.7648
16.6	17.2414	16.6	-21.3648	16.7	-28.2664	16.6	166.03	16.8	38.857	16.7	81.3289
16.7	16.893	16.7	-21.3898	16.8	-28.2656	16.7	175.123	16.9	39.1914	16.8	83.8656
16.8	16.7367	16.8	-21.5148	16.9	-28.2617	16.8	184.656	17	39.7172	16.9	86.5266
16.9	16.6508	16.9	-21.3188	17	-28.1398	16.9	194.373	17.1	40.4875	17	88.9836
17	16.8141	17	-21.2875	17.1	-28.05	17	204.379	17.2	41.3266	17.1	91.4992
17.1	17.0516	17.1	-21.3562	17.2	-27.9547	17.1	214.859	17.3	42.3	17.2	93.9023
17.2	17.007	17.2	-21.3609	17.3	-27.7836	17.2	224.904	17.4	43.6352	17.3	96.5734
17.3	17.1141	17.3	-21.3242	17.4	-27.5883	17.3	235.48	17.5	45.1547	17.4	98.5641
17.4	17.5617	17.4	-21.2422	17.5	-27.4242	17.4	245.931	17.6	46.9664	17.5	100.643
17.5	18.1992	17.5	-21.2328	17.6	-27.2828	17.5	256.247	17.7	49.1336	17.6	102.757
17.6	18.3453	17.6	-21.1977	17.7	-27.1586	17.6	266.643	17.8	51.6531	17.7	104.621
17.7	18.9633	17.7	-21.0602	17.8	-27.0992	17.7	277.021	17.9	54.3711	17.8	106.43
17.8	19.4867	17.8	-20.9125	17.9	-26.9937	17.8	286.999	18	57.2563	17.9	108.198
17.9	19.9445	17.9	-20.7633	18	-26.9312	17.9	297.355	18.1	60.6024	18	109.688
18	20.3656	18	-20.6102	18.1	-26.9078	18	307.407	18.2	64.4297	18.1	111.091
18.1	20.7344	18.1	-20.4383	18.2	-26.8773	18.1	317.284	18.3	68.5391	18.2	112.638
18.2	21.1953	18.2	-20.3086	18.3	-26.8414	18.2	326.789	18.4	72.8633	18.3	113.841
18.3	21.5875	18.3	-20.1539	18.4	-26.8305	18.3	336.316	18.5	77.4391	18.4	115.036
18.4	21.9734	18.4	-20.0781	18.5	-26.7625	18.4	345.63	18.6	82.3328	18.5	116.292
18.5	22.4555	18.5	-19.9492	18.6	-26.6109	18.5	354.665	18.7	87.4891	18.6	117.529
18.6	22.9211	18.6	-19.7336	18.7	-26.5047	18.6	363.868	18.8	92.8906	18.7	118.522
18.7	23.4195	18.7	-19.5383	18.8	-26.4226	18.7	372.513	18.9	98.3602	18.8	119.603
18.8	23.8977	18.8	-19.3156	18.9	-26.325	18.8	381.095	19	103.99	18.9	120.409
18.9	24.3766	18.9	-19.1406	19	-26.2164	18.9	389.47	19.1	109.94	19	121.189
19	24.7734	19	-18.9711	19.1	-26.1109	19	397.676	19.2	116.028	19.1	121.98
19.1	25.207	19.1	-18.8078	19.2	-26.0164	19.1	405.741	19.3	122.237	19.2	122.759
19.2	25.6664	19.2	-18.7133	19.3	-25.907	19.2	413.369	19.4	128.538	19.3	123.507
19.3	26.0695	19.3	-18.5742	19.4	-25.818	19.3	421.048	19.5	134.956	19.4	124.155
19.4	26.4266	19.4	-18.4242	19.5	-25.7351	19.4	428.553	19.6	141.621	19.5	124.663
19.5	26.8617	19.5	-18.3078	19.6	-25.6695	19.5	435.845	19.7	148.193	19.6	125.233
19.6	27.2383	19.6	-18.1789	19.7	-25.614	19.6	442.713	19.8	154.654	19.7	125.733
19.7	27.5945	19.7	-18.0688	19.8	-25.575	19.7	449.455	19.9	161.284	19.8	126.284
19.8	27.9445	19.8	-17.9008	19.9	-25.5242	19.8	456.123	20	168.002	19.9	126.804
19.9	28.2695	19.9	-17.6969	20	-25.4664	19.9	462.396	20.1	174.789	20	127.253
20	28.5945	20	-17.5102	20.1	-25.443	20	468.615	20.2	181.499	20.1	127.69
20.1	28.957	20.1	-17.3188	20.2	-25.3953	20.1	474.874	20.3	188.316	20.2	128.12
20.2	29.2852	20.2	-17.1344	20.3	-25.3727	20.2	480.491	20.4	195.041	20.3	128.562
20.3	29.6172	20.3	-16.9898	20.4	-25.332	20.3	486.162	20.5	201.741	20.4	129.008
20.4	29.9812	20.4	-16.8461	20.5	-25.3055	20.4	491.956	20.6	208.563	20.5	129.358
20.5	30.2773	20.5	-16.6539	20.6	-25.2516	20.5	497.283	20.7	215.154	20.6	129.656
20.6	30.5859	20.6	-16.5094	20.7	-25.1914	20.6	502.542	20.8	221.813	20.7	129.995
20.7	30.8523	20.7	-16.3687	20.8	-25.118	20.7	507.263	20.9	228.414	20.8	130.276
20.8	31.1125	20.8	-16.2094	20.9	-25.0476	20.8	512.081	21	235.059	20.9	130.554
20.9	31.3961	20.9	-16.0641	21	-24.989	20.9	516.802	21.1	241.483	21	130.828
21	31.6836	21	-15.8922	21.1	-24.9305	21	521.409	21.2	248.005	21.1	131.1
21.1	31.9578	21.1	-15.7156	21.2	-24.8766	21.1	525.756	21.3	254.252	21.2	131.359
21.2	32.257	21.2	-15.5766	21.3	-24.8164	21.2	529.991	21.4	260.475	21.3	131.627
21.3	32.5406	21.3	-15.5172	21.4	-24.7539	21.3	534.072	21.5	266.816	21.4	131.89
21.4	32.8242	21.4	-15.357	21.5	-24.7078	21.4	537.902	21.6	273.123	21.5	132.137
21.5	33.1062	21.5	-15.2312	21.6	-24.657	21.5	541.689	21.7	279.159	21.6	132.377
21.6	33.3992	21.6	-15.0992	21.7	-24.618	21.6	545.495	21.8	285.229	21.7	132.652
21.7	33.6523	21.7	-14.9266	21.8	-24.5867	21.7	548.909	21.9	291.109	21.8	132.855
21.8	33.8953	21.8	-14.7664	21.9	-24.5594	21.8	552.303	22	296.965	21.9	133.12
21.9	34.1641	21.9	-14.6258	22	-24.5398	21.9	555.679	22.1	302.784	22	133.344
22	34.4117	22	-14.493	22.1	-24.5156	22	558.732	22.2	308.499	22.1	133.57
22.1	34.6914	22.1	-14.3492	22.2	-24.4742	22.1	561.808	22.3	314.05	22.2	133.777
22.2	34.9266	22.2	-14.2234	22.3	-24.4109	22.2	564.912	22.4	319.477	22.3	133.987
22.3	35.1492	22.3	-14.0867	22.4	-24.3672	22.3	567.636	22.5	325.222	22.4	134.215
22.4	35.3828	22.4	-13.9344	22.5	-24.2945	22.4	570.359	22.6	330.499	22.5	134.409
22.5	35.6133	22.5	-13.8062	22.6	-24.2453	22.5	573.065	22.7	335.645	22.6	134.558
22.6	35.8492	22.6	-13.7039	22.7	-24.1805	22.6	575.648	22.8	340.788	22.7	134.759
22.7	36.1062	22.7	-13.5711	22.8	-24.1219	22.7	578.151	22.9	345.937	22.8	134.96
22.8	36.3711	22.8	-13.4555	22.9	-24.0437	22.8	580.366	23	351.016	22.9	135.133
22.9	36.6187	22.9	-13.3445	23	-23.9687	22.9	582.585	23.1	355.999	23	135.303
23	36.8562	23	-13.243	23.1	-23.8719	23	584.808	23.2	360.716	23.1	135.492
23.1	37.0477	23.1	-13.1305	23.2	-23.789	23.1	586.924	23.3	365.417	23.2	135.652
23.2	37.2813	23.2	-12.9688	23.3	-23.7117	23.2	588.94	23.4	370.058	23.3	135.827
23.3	37.5133	23.3	-12.825	23.4	-23.6437	23.3	590.937	23.5	374.559	23.4	136.012
23.4	37.7375	23.4	-12.7008	23.5	-23.5789	23.4	592.83	23.6	378.997	23.5	136.198
23.5	37.943	23.5	-12.5789	23.6	-23.532	23.5	594.711	23.7	383.402	23.6	136.402
23.6	38.1766	23.6	-12.4336	23.7	-23.4695	23.6	596.483	23.8	387.655	23.7	136.57
23.7	38.4141	23.7	-12.2711	23.8	-23.3984	23.7	598.178	23.9	391.859	23.8	136.723
23.8	38.618	23.8	-12.1766	23.9	-23.3555	23.8	599.777	24	395.864	23.9	136.878
23.9	38.8367	23.9	-12.0399	24	-23.3094	23.9	601.359	24.1	399.855	24	137.038
24	39.0398	24	-11.8781	24.1	-23.2703	24	602.932	24.2	403.845	24.1	137.188
24.1	39.2469	24.1	-11.7352	24.2	-23.243	24.1	604.566	24.3	407.789	24.2	137.32
24.2	39.4969	24.2	-11.5953	24.3	-23.2117	24.2	606.136	24.4	411.665	24.3	137.456
24.3	39.7469	24.3	-11.4727	24.4	-23.1836	24.3	607.37	24.5	415.265	24.4	137.618
24.4	39.9805	24.4	-11.3633	24.5	-23.1484	24.4	608.706	24.6	418.755	24.5	137.745
24.5	40.2086	24.5	-11.2391	24.6	-23.0898	24.5	609.976	24.7	422.445	24.6	137.856
24.6	40.4297	24.6	-11.1227	24.7	-22.9977	24.6	611.277	24.8	426.044	24.7	138.023
24.7	40.6297	24.7	-11.0273	24.8	-22.9336	24.7	612.456	24.9	429.309	24.8	138.159
24.8	40.8125	24.8	-10.8914	24.9	-22.8547	24.8	613.585	25	432.598	24.9	138.293
24.9	41.0016	24.9	-10.7578	25	-22.782	24.9	614.706	25.1	435.879	25	138.41
25	41.1914	25	-10.6445	25.1	-22.707	25	615.772	25.2	439.075	25.1	138.527
25.1	41.4227	25.1	-10.525	25.2	-22.6211	25.1	616.886	25.3	442.141	25.2	138.641
25.2	41.6102	25.2	-10.4063	25.3	-22.5273	25.2	617.945	25.4	445.141	25.3	138.762
25.3	41.7891	25.3	-10.293	25.4	-22.4344	25.3	618.968	25.5	448.044	25.4	138.902
25.4	41.9703	25.4	-10.1883	25.5	-22.3445	25.4	619.991	25.6	450.969	25.5	139.019
25.5	42.1523	25.5	-10.0594	25.6	-22.2937	25.5	620.933	25.7	453.855	25.6	139.121
25.6	42.3609	25.6	-9.95001	25.7	-22.2336	25.6	621.796	25.8	456.622	25.7	139.23
25.7	42.543	25.7	-9.81171	25.8	-22.168	25.7	622.644	25.9	459.362	25.8	139.32
25.8	42.743	25.8	-9.68829	25.9	-22.0984	25.8	623.495	26	462.02	25.9	139.453
25.9	42.9578	25.9	-9.59845	26	-22.0711	25.9	624.291	26.1	464.547	26	139.566
26	43.1602	26	-9.49609	26.1	-22.0273	26	625.062	26.2	466.988	26.1	139.699
26.1	43.3687	26.1	-9.37656	26.2	-21.989	26.1	625.82	26.3	469.423	26.2	139.793
26.2	43.5789	26.2	-9.26093	26.3	-21.9422	26.2	626.605	26.4	471.833	26.3	139.891
26.3	43.7586	26.3	-9.14923	26.4	-21.8953	26.3	627.33	26.5	474.238	26.4	139.992
26.4	43.9406	26.4	-9.02032	26.5	-21.8508	26.4	628.039	26.6	476.539	26.5	140.097
26.5	44.1062	26.5	-8.89453	26.6	-21.8015	26.5	628.78	26.7	478.727	26.6	140.187
26.6	44.2977	26.6	-8.78204	26.7	-21.7305	26.6	629.523	26.8	480.86	26.7	140.274
26.7	44.4578	26.7	-8.65625	26.8	-21.6414	26.7	630.214	26.9	483.027	26.8	140.391
26.8	44.6258	26.8	-8.53204	26.9	-21.5945	26.8	630.862	27	485.063	26.9	140.476
26.9	44.8125	26.9	-8.41016	27	-21.5344	26.9	631.48	27.1	487.117	27	140.555
27	44.9922	27	-8.27423	27.1	-21.4492	27	632.105	27.2	489.153	27.1	140.651
27.1	45.193	27.1	-8.14374	27.2	-21.4195	27.1	632.741	27.3	491.081	27.2	140.755
27.2	45.3898	27.2	-8.02032	27.3	-21.3633	27.2	633.377	27.4	492.947	27.3	140.832
27.3	45.5867	27.3	-7.91406	27.4	-21.3008	27.3	633.984	27.5	494.738	27.4	140.922
27.4	45.7906	27.4	-7.82111	27.5	-21.2305	27.4	634.559	27.6	496.496	27.5	141.012
27.5	45.9891	27.5	-7.71875	27.6	-21.1992	27.5	635.175	27.7	498.18	27.6	141.097
27.6	46.1719	27.6	-7.60938	27.7	-21.1883	27.6	635.773	27.8	499.887	27.7	141.196
27.7	46.3445	27.7	-7.49609	27.8	-21.1445	27.7	636.241	27.9	501.535	27.8	141.327
27.8	46.4773	27.8	-7.39844	27.9	-21.1094	27.8	636.691	28	503.134	27.9	141.438
27.9	46.6406	27.9	-7.30157	28	-21.0484	27.9	637.155	28.1	504.741	28	141.563
28	46.7977	28	-7.19531	28.1	-20.9961	28	637.631	28.2	506.348	28.1	141.655
28.1	46.9461	28.1	-7.10236	28.2	-20.9562	28.1	638.093	28.3	507.872	28.2	141.755
28.2	47.1133	28.2	-7.00781	28.3	-20.9117	28.2	638.554	28.4	509.406	28.3	141.866
28.3	47.2664	28.3	-6.88672	28.4	-20.8351	28.3	639.003	28.5	510.829	28.4	141.973
28.4	47.4266	28.4	-6.79376	28.5	-20.7812	28.4	639.464	28.6	512.195	28.5	142.059
28.5	47.5984	28.5	-6.68439	28.6	-20.7234	28.5	639.91	28.7	513.516	28.6	142.16
28.6	47.7586	28.6	-6.58984	28.7	-20.6523	28.6	640.358	28.8	514.802	28.7	142.25
28.7	47.95	28.7	-6.47186	28.8	-20.582	28.7	640.801	28.9	516.086	28.8	142.34
28.8	48.1359	28.8	-6.36017	28.9	-20.5195	28.8	641.229	29	517.395	28.9	142.394
28.9	48.325	28.9	-6.22656	29	-20.4765	28.9	641.644	29.1	518.661	29	142.469
29	48.5242	29	-6.13361	29.1	-20.4101	29	642.078	29.2	519.884	29.1	142.559
29.1	48.7156	29.1	-6.03906	29.2	-20.3359	29.1	642.484	29.3	521.117	29.2	142.657
29.2	48.8875	29.2	-5.91095	29.3	-20.282	29.2	642.881	29.4	522.333	29.3	142.745
29.3	49.082	29.3	-5.81171	29.4	-20.2039	29.3	643.273	29.5	523.465	29.4	142.855
29.4	49.2594	29.4	-5.71173	29.5	-20.1523	29.4	643.655	29.6	524.634	29.5	142.946
29.5	49.4531	29.5	-5.58984	29.6	-20.0976	29.5	644.034	29.7	525.734	29.6	143.023
29.6	49.6109	29.6	-5.46875	29.7	-20.0633	29.6	644.382	29.8	526.669	29.7	143.085
29.7	49.793	29.7	-5.34766	29.8	-20	29.7	644.753	29.9	527.707	29.8	143.157
29.8	49.9648	29.8	-5.22345	29.9	-19.9492	29.8	645.105	30	528.666	29.9	143.226
29.9	50.1375	29.9	-5.10938	30	-19.9101	29.9	645.464	30.1	529.624	30	143.317
30	50.2852	30	-5.02734	30.1	-19.8367	30	645.804	30.2	530.556	30.1	143.386
30.1	50.4383	30.1	-4.89844	30.2	-19.8039	30.1	646.124	30.3	531.527	30.2	143.461
30.2	50.5984	30.2	-4.77734	30.3	-19.7469	30.2	646.452	30.4	532.418	30.3	143.543
30.3	50.7703	30.3	-4.65314	30.4	-19.6719	30.3	646.773	30.5	533.274	30.4	143.605
30.4	50.9336	30.4	-4.53906	30.5	-19.6289	30.4	647.093	30.6	534.125	30.5	143.665
30.5	51.1055	30.5	-4.42499	30.6	-19.5859	30.5	647.425	30.7	535.032	30.6	143.745
30.6	51.2547	30.6	-4.30624	30.7	-19.5437	30.6	647.734	30.8	535.887	30.7	143.84
30.7	51.4609	30.7	-4.20624	30.8	-19.4805	30.7	648.034	30.9	536.712	30.8	143.907
30.8	51.6375	30.8	-4.09766	30.9	-19.418	30.8	648.343	31	537.496	30.9	143.976
30.9	51.8055	30.9	-3.98828	31	-19.3758	30.9	648.637	31.1	538.305	31	144.051
31	51.9773	31	-3.89063	31.1	-19.3125	31	648.937	31.2	539.125	31.1	144.112
31.1	52.125	31.1	-3.77734	31.2	-19.2383	31.1	649.226	31.3	539.923	31.2	144.165
31.2	52.2703	31.2	-3.70392	31.3	-19.1875	31.2	649.515	31.4	540.695	31.3	144.223
31.3	52.4461	31.3	-3.60938	31.4	-19.1414	31.3	649.819	31.5	541.411	31.4	144.265
31.4	52.6297	31.4	-3.53906	31.5	-19.1094	31.4	650.093	31.6	542.055	31.5	144.316
31.5	52.8094	31.5	-3.4422	31.6	-19.0555	31.5	650.382	31.7	542.751	31.6	144.384
31.6	52.9875	31.6	-3.33984	31.7	-18.9953	31.6	650.668	31.8	543.411	31.7	144.434
31.7	53.157	31.7	-3.22656	31.8	-18.9265	31.7	650.945	31.9	544.086	31.8	144.461
31.8	53.3172	31.8	-3.14063	31.9	-18.8711	31.8	651.226	32	544.746	31.9	144.546
31.9	53.4922	31.9	-3.00781	32	-18.8125	31.9	651.503	32.1	545.395	32	144.602
32	53.6648	32	-2.91016	32.1	-18.743	32	651.765	32.2	546.04	32.1	144.663
32.1	53.8531	32.1	-2.80859	32.2	-18.6914	32.1	652.046	32.3	546.68	32.2	144.727
32.2	54.0352	32.2	-2.67267	32.3	-18.6484	32.2	652.287	32.4	547.238	32.3	144.794
32.3	54.2109	32.3	-2.58514	32.4	-18.5945	32.3	652.542	32.5	547.802	32.4	144.866
32.4	54.3758	32.4	-2.48517	32.5	-18.5344	32.4	652.797	32.6	548.348	32.5	144.969
32.5	54.5398	32.5	-2.35938	32.6	-18.4656	32.5	653.054	32.7	548.911	32.6	145.055
32.6	54.6914	32.6	-2.29376	32.7	-18.4023	32.6	653.304	32.8	549.488	32.7	145.124
32.7	54.8406	32.7	-2.22577	32.8	-18.3476	32.7	653.537	32.9	550.016	32.8	145.188
32.8	54.9844	32.8	-2.14532	32.9	-18.3055	32.8	653.792	33	550.525	32.9	145.274
32.9	55.1375	32.9	-2.05389	33	-18.2453	32.9	654.027	33.1	551.042	33	145.347
33	55.293	33	-1.99298	33.1	-18.1844	33	654.277	33.2	551.547	33.1	145.413
33.1	55.4578	33.1	-1.91016	33.2	-18.1406	33.1	654.518	33.3	552.059	33.2	145.466
33.2	55.6445	33.2	-1.80389	33.3	-18.0703	33.2	654.745	33.4	552.574	33.3	145.531
33.3	55.7977	33.3	-1.71173	33.4	-18.0242	33.3	654.977	33.5	553.052	33.4	145.597
33.4	55.9531	33.4	-1.63672	33.5	-17.9726	33.4	655.214	33.6	553.528	33.5	145.634
33.5	56.1062	33.5	-1.56329	33.6	-17.925	33.5	655.448	33.7	554.024	33.6	145.675
33.6	56.2422	33.6	-1.47577	33.7	-17.8594	33.6	655.671	33.8	554.472	33.7	145.747
33.7	56.4039	33.7	-1.38361	33.8	-17.782	33.7	655.894	33.9	554.93	33.8	145.796
33.8	56.5867	33.8	-1.28906	33.9	-17.7469	33.8	656.109	34	555.411	33.9	145.832
33.9	56.7688	33.9	-1.19922	34	-17.6867	33.9	656.316	34.1	555.88	34	145.879
34	56.9234	34	-1.09296	34.1	-17.6258	34	656.537	34.2	556.355	34.1	145.937
34.1	57.0578	34.1	-0.992981	34.2	-17.5898	34.1	656.727	34.3	556.787	34.2	145.985
34.2	57.2125	34.2	-0.890625	34.3	-17.5117	34.2	656.945	34.4	557.199	34.3	146.039
34.3	57.368	34.3	-0.805481	34.4	-17.4687	34.3	657.147	34.5	557.598	34.4	146.097
34.4	57.5188	34.4	-0.694519	34.5	-17.407	34.4	657.362	34.6	557.977	34.5	146.165
34.5	57.6766	34.5	-0.614075	34.6	-17.3351	34.5	657.578	34.7	558.406	34.6	146.206
34.6	57.8125	34.6	-0.503113	34.7	-17.282	34.6	657.77	34.8	558.79	34.7	146.25
34.7	58.0086	34.7	-0.410156	34.8	-17.2695	34.7	657.948	34.9	559.173	34.8	146.262
34.8	58.1719	34.8	-0.305481	34.9	-17.243	34.8	658.152	35	559.54	34.9	146.309
34.9	58.3055	34.9	-0.191406	35	-17.2305	34.9	658.348	35.1	559.913	35	146.355
35	58.4531	35	-0.0898438	35.1	-17.1601	35	658.554	35.2	560.309	35.1	146.395
35.1	58.6062	35.1	-0.00311279	35.2	-17.1336	35.1	658.756	35.3	560.673	35.2	146.445
35.2	58.7656	35.2	0.0968628	35.3	-17.0656	35.2	658.969	35.4	561.04	35.3	146.508
35.3	58.8992	35.3	0.199219	35.4	-17.0515	35.3	659.178	35.5	561.387	35.4	146.563
35.4	59.0547	35.4	0.28595	35.5	-17.043	35.4	659.398	35.6	561.715	35.5	146.621
35.5	59.2195	35.5	0.358582	35.6	-17.0164	35.5	659.598	35.7	562.052	35.6	146.695
35.6	59.3992	35.6	0.449219	35.7	-16.9641	35.6	659.78	35.8	562.391	35.7	146.758
35.7	59.5664	35.7	0.53125	35.8	-16.9414	35.7	659.984	35.9	562.71	35.8	146.828
35.8	59.7	35.8	0.624207	35.9	-16.8672	35.8	660.199	36	563.032	35.9	146.915
35.9	59.8484	35.9	0.72345	36	-16.8445	35.9	660.389	36.1	563.341	36	146.976
36	59.9914	36	0.8125	36.1	-16.8055	36	660.566	36.2	563.665	36.1	147.02
36.1	60.1375	36.1	0.890625	36.2	-16.7734	36.1	660.745	36.3	563.945	36.2	147.095
36.2	60.2898	36.2	0.975769	36.3	-16.7031	36.2	660.894	36.4	564.246	36.3	147.133
36.3	60.4305	36.3	1.05859	36.4	-16.6484	36.3	661.088	36.5	564.537	36.4	147.167
36.4	60.5578	36.4	1.16486	36.5	-16.6211	36.4	661.266	36.6	564.843	36.5	147.199
36.5	60.7047	36.5	1.26172	36.6	-16.5586	36.5	661.428	36.7	565.13	36.6	147.245
36.6	60.8289	36.6	1.37109	36.7	-16.539	36.6	661.598	36.8	565.438	36.7	147.274
36.7	60.9844	36.7	1.47266	36.8	-16.4734	36.7	661.77	36.9	565.731	36.8	147.309
36.8	61.125	36.8	1.54297	36.9	-16.4101	36.8	661.94	37	566.023	36.9	147.355
36.9	61.2664	36.9	1.61639	37	-16.3547	36.9	662.09	37.1	566.309	37	147.379
37	61.4305	37	1.6875	37.1	-16.2742	37	662.26	37.2	566.598	37.1	147.418
37.1	61.5891	37.1	1.76953	37.2	-16.2305	37.1	662.449	37.3	566.855	37.2	147.497
37.2	61.7391	37.2	1.84454	37.3	-16.1875	37.2	662.639	37.4	567.122	37.3	147.52
37.3	61.9141	37.3	1.92188	37.4	-16.1367	37.3	662.836	37.5	567.391	37.4	147.59
37.4	62.0758	37.4	1.99219	37.5	-16.0945	37.4	663.018	37.6	567.629	37.5	147.667
37.5	62.2375	37.5	2.0578	37.6	-16.039	37.5	663.188	37.7	567.867	37.6	147.735
37.6	62.4039	37.6	2.12891	37.7	-16	37.6	663.359	37.8	568.117	37.7	147.784
37.7	62.5625	37.7	2.21094	37.8	-15.9609	37.7	663.537	37.9	568.336	37.8	147.828
37.8	62.7195	37.8	2.28906	37.9	-15.9101	37.8	663.707	38	568.583	37.9	147.886
37.9	62.8828	37.9	2.39063	38	-15.8515	37.9	663.886	38.1	568.813	38	147.934
38	63.043	38	2.47577	38.1	-15.7976	38	664.077	38.2	569.03	38.1	148
38.1	63.2078	38.1	2.54376	38.2	-15.7734	38.1	664.258	38.3	569.275	38.2	148.046
38.2	63.3797	38.2	2.62891	38.3	-15.7148	38.2	664.433	38.4	569.527	38.3	148.083
38.3	63.5156	38.3	2.71875	38.4	-15.6516	38.3	664.609	38.5	569.743	38.4	148.141
38.4	63.6375	38.4	2.80078	38.5	-15.5969	38.4	664.768	38.6	569.961	38.5	148.199
38.5	63.793	38.5	2.89844	38.6	-15.543	38.5	664.91	38.7	570.191	38.6	148.25
38.6	63.95	38.6	2.98749	38.7	-15.4851	38.6	665.069	38.8	570.43	38.7	148.301
38.7	64.0984	38.7	3.05859	38.8	-15.425	38.7	665.219	38.9	570.645	38.8	148.355
38.8	64.2734	38.8	3.14844	38.9	-15.3711	38.8	665.377	39	570.855	38.9	148.384
38.9	64.4305	38.9	3.22736	39	-15.2976	38.9	665.527	39.1	571.071	39	148.43
39	64.6055	39	3.32031	39.1	-15.2414	39	665.666	39.2	571.285	39.1	148.461
39.1	64.7539	39.1	3.40234	39.2	-15.1961	39.1	665.809	39.3	571.517	39.2	148.495
39.2	64.9023	39.2	3.51172	39.3	-15.1484	39.2	665.964	39.4	571.734	39.3	148.536
39.3	65.0328	39.3	3.59686	39.4	-15.0984	39.3	666.098	39.5	571.942	39.4	148.558
39.4	65.2102	39.4	3.68439	39.5	-15.0586	39.4	666.248	39.6	572.164	39.5	148.59
39.5	65.3953	39.5	3.77655	39.6	-15.0148	39.5	666.382	39.7	572.395	39.6	148.636
39.6	65.5516	39.6	3.84766	39.7	-14.9687	39.6	666.527	39.8	572.618	39.7	148.665
39.7	65.6875	39.7	3.9375	39.8	-14.9148	39.7	666.69	39.9	572.829	39.8	148.711
39.8	65.8094	39.8	4.05078	39.9	-14.8547	39.8	666.836	40	573.035	39.9	148.745
39.9	65.9602	39.9	4.12891	40	-14.8055	39.9	666.998	40.1	573.239	40	148.774
40	66.1227	40	4.21875	40.1	-14.7547	40	667.168	40.2	573.445	40.1	148.796
40.1	66.2492	40.1	4.30078	40.2	-14.7141	40.1	667.338	40.3	573.646	40.2	148.817
40.2	66.3992	40.2	4.37891	40.3	-14.6719	40.2	667.496	40.4	573.867	40.3	148.835
40.3	66.5516	40.3	4.46094	40.4	-14.6062	40.3	667.644	40.5	574.066	40.4	148.876
40.4	66.6953	40.4	4.55859	40.5	-14.5508	40.4	667.777	40.6	574.27	40.5	148.917
40.5	66.8211	40.5	4.64844	40.6	-14.4875	40.5	667.92	40.7	574.488	40.6	148.949
40.6	66.9453	40.6	4.73828	40.7	-14.418	40.6	668.047	40.8	574.68	40.7	149.003
40.7	67.1023	40.7	4.82813	40.8	-14.3758	40.7	668.187	40.9	574.884	40.8	149.024
40.8	67.2414	40.8	4.91797	40.9	-14.3242	40.8	668.312	41	575.078	40.9	149.066
40.9	67.3797	40.9	4.98828	41	-14.2695	40.9	668.467	41.1	575.324	41	149.114
41	67.5156	41	5.07813	41.1	-14.2383	41	668.598	41.2	575.532	41.1	149.148
41.1	67.6445	41.1	5.14844	41.2	-14.1992	41.1	668.741	41.3	575.704	41.2	149.187
41.2	67.8094	41.2	5.23828	41.3	-14.1406	41.2	668.862	41.4	575.848	41.3	149.219
41.3	67.9617	41.3	5.30859	41.4	-14.114	41.3	668.977	41.5	576.011	41.4	149.255
41.4	68.0938	41.4	5.39844	41.5	-14.0898	41.4	669.093	41.6	576.251	41.5	149.277
41.5	68.2781	41.5	5.46094	41.6	-14.0461	41.5	669.226	41.7	576.457	41.6	149.293
41.6	68.4258	41.6	5.55078	41.7	-14.0242	41.6	669.346	41.8	576.68	41.7	149.309
41.7	68.5711	41.7	5.64063	41.8	-13.9492	41.7	669.516	41.9	576.864	41.8	149.34
41.8	68.7219	41.8	5.73047	41.9	-13.9023	41.8	669.647	42	577.078	41.9	149.379
41.9	68.8648	41.9	5.80859	42	-13.8351	41.9	669.797	42.1	577.192	42	149.405
42	69.0156	42	5.89063	42.1	-13.7594	42	669.913	42.2	577.32	42.1	149.434
42.1	69.1805	42.1	5.98047	42.2	-13.7062	42.1	670.039	42.3	577.477	42.2	149.464
42.2	69.3391	42.2	6.07813	42.3	-13.6406	42.2	670.159	42.4	577.676	42.3	149.508
42.3	69.5055	42.3	6.14844	42.4	-13.5945	42.3	670.289	42.5	577.845	42.4	149.52
42.4	69.6516	42.4	6.23828	42.5	-13.5266	42.4	670.428	42.6	577.972	42.5	149.559
42.5	69.8172	42.5	6.33984	42.6	-13.4539	42.5	670.578	42.7	578.153	42.6	149.606
42.6	69.9727	42.6	6.41016	42.7	-13.3906	42.6	670.717	42.8	578.333	42.7	149.621
42.7	70.125	42.7	6.48047	42.8	-13.3547	42.7	670.848	42.9	578.52	42.8	149.66
42.8	70.275	42.8	6.53906	42.9	-13.2984	42.8	670.948	43	578.641	42.9	149.699
42.9	70.4141	42.9	6.60938	43	-13.2617	42.9	671.078	43.1	578.773	43	149.75
43	70.5711	43	6.67969	43.1	-13.2141	43	671.188	43.2	578.903	43.1	149.784
43.1	70.6906	43.1	6.75781	43.2	-13.2039	43.1	671.299	43.3	579.039	43.2	149.828
43.2	70.8406	43.2	6.8172	43.3	-13.1797	43.2	671.433	43.4	579.153	43.3	149.879
43.3	70.9961	43.3	6.86249	43.4	-13.1719	43.3	671.542	43.5	579.277	43.4	149.913
43.4	71.1102	43.4	6.94922	43.5	-13.1375	43.4	671.668	43.6	579.415	43.5	149.957
43.5	71.2344	43.5	7	43.6	-13.0969	43.5	671.768	43.7	579.559	43.6	150.008
43.6	71.3719	43.6	7.05078	43.7	-13.0703	43.6	671.902	43.8	579.668	43.7	150.059
43.7	71.4844	43.7	7.13361	43.8	-13.0242	43.7	672.016	43.9	579.816	43.8	150.106
43.8	71.6328	43.8	7.22266	43.9	-12.9953	43.8	672.148	44	579.954	43.9	150.141
43.9	71.7703	43.9	7.32031	44	-12.9578	43.9	672.292	44.1	580.07	44	150.187
44	71.9141	44	7.40234	44.1	-12.8828	44	672.44	44.2	580.191	44.1	150.216
44.1	72.0398	44.1	7.47266	44.2	-12.8242	44.1	672.581	44.3	580.341	44.2	150.262
44.2	72.1758	44.2	7.55078	44.3	-12.7375	44.2	672.727	44.4	580.477	44.3	150.32
44.3	72.3047	44.3	7.62891	44.4	-12.6601	44.3	672.866	44.5	580.595	44.4	150.359
44.4	72.4305	44.4	7.73358	44.5	-12.5945	44.4	672.996	44.6	580.711	44.5	150.386
44.5	72.5938	44.5	7.80859	44.6	-12.5226	44.5	673.129	44.7	580.864	44.6	150.41
44.6	72.7344	44.6	7.91486	44.7	-12.5094	44.6	673.26	44.8	581.015	44.7	150.454
44.7	72.8914	44.7	8.01172	44.8	-12.4484	44.7	673.379	44.9	581.148	44.8	150.492
44.8	73.043	44.8	8.08984	44.9	-12.3984	44.8	673.498	45	581.282	44.9	150.527
44.9	73.1805	44.9	8.16016	45	-12.3594	44.9	673.617	45.1	581.423	45	150.57
45	73.3195	45	8.23358	45.1	-12.3281	45	673.734	45.2	581.59	45.1	150.609
45.1	73.4773	45.1	8.30859	45.2	-12.2789	45.1	673.843	45.3	581.741	45.2	150.641
45.2	73.6414	45.2	8.39844	45.3	-12.2648	45.2	673.936	45.4	581.857	45.3	150.684
45.3	73.7852	45.3	8.45703	45.4	-12.2265	45.3	674.042	45.5	581.984	45.4	150.718
45.4	73.9422	45.4	8.54376	45.5	-12.1992	45.4	674.137	45.6	582.122	45.5	150.75
45.5	74.0859	45.5	8.62891	45.6	-12.1453	45.5	674.258	45.7	582.246	45.6	150.789
45.6	74.2	45.6	8.67969	45.7	-12.1125	45.6	674.358	45.8	582.372	45.7	150.84
45.7	74.3313	45.7	8.73828	45.8	-12.0555	45.7	674.457	45.9	582.488	45.8	150.874
45.8	74.45	45.8	8.84454	45.9	-12.0164	45.8	674.562	46	582.605	45.9	150.898
45.9	74.5906	45.9	8.92969	46	-11.968	45.9	674.678	46.1	582.736	46	150.934
46	74.7461	46	9	46.1	-11.9297	46	674.797	46.2	582.879	46.1	150.976
46.1	74.9141	46.1	9.08203	46.2	-11.8633	46.1	674.898	46.3	582.996	46.2	151
46.2	75.0203	46.2	9.15234	46.3	-11.8203	46.2	675.01	46.4	583.117	46.3	151.044
46.3	75.1563	46.3	9.22266	46.4	-11.7695	46.3	675.12	46.5	583.251	46.4	151.09
46.4	75.2773	46.4	9.29608	46.5	-11.7453	46.4	675.241	46.6	583.387	46.5	151.105
46.5	75.4063	46.5	9.37109	46.6	-11.7156	46.5	675.348	46.7	583.535	46.6	151.16
46.6	75.543	46.6	9.44922	46.7	-11.6875	46.6	675.448	46.8	583.666	46.7	151.196
46.7	75.7	46.7	9.53125	46.8	-11.6765	46.7	675.578	46.9	583.804	46.8	151.218
46.8	75.8484	46.8	9.59454	46.9	-11.6476	46.8	675.714	47	583.95	46.9	151.25
46.9	76.0156	46.9	9.65234	47	-11.6062	46.9	675.855	47.1	584.134	47	151.296
47	76.1414	47	9.73358	47.1	-11.5703	47	675.972	47.2	584.263	47.1	151.316
47.1	76.2656	47.1	9.80078	47.2	-11.5187	47.1	676.078	47.3	584.382	47.2	151.352
47.2	76.3945	47.2	9.87189	47.3	-11.4812	47.2	676.19	47.4	584.516	47.3	151.398
47.3	76.543	47.3	9.94141	47.4	-11.4726	47.3	676.277	47.5	584.673	47.4	151.425
47.4	76.6805	47.4	10.0226	47.5	-11.4445	47.4	676.382	47.6	584.789	47.5	151.454
47.5	76.8289	47.5	10.1094	47.6	-11.3875	47.5	676.491	47.7	584.911	47.6	151.488
47.6	76.9453	47.6	10.1922	47.7	-11.3398	47.6	676.609	47.8	585.027	47.7	151.527
47.7	77.0711	47.7	10.2617	47.8	-11.3	47.7	676.698	47.9	585.161	47.8	151.555
47.8	77.1953	47.8	10.3367	47.9	-11.25	47.8	676.789	48	585.273	47.9	151.585
47.9	77.3359	47.9	10.425	48	-11.2234	47.9	676.889	48.1	585.377	48	151.606
48	77.4617	48	10.5	48.1	-11.2109	48	676.988	48.2	585.48	48.1	151.628
48.1	77.6133	48.1	10.5781	48.2	-11.1672	48.1	677.093	48.3	585.593	48.2	151.66
48.2	77.7539	48.2	10.6531	48.3	-11.1289	48.2	677.166	48.4	585.731	48.3	151.683
48.3	77.8914	48.3	10.7336	48.4	-11.1015	48.3	677.277	48.5	585.848	48.4	151.716
48.4	78.0352	48.4	10.8086	48.5	-11.0359	48.4	677.379	48.6	585.942	48.5	151.75
48.5	78.2	48.5	10.8836	48.6	-10.9562	48.5	677.498	48.7	586.063	48.6	151.784
48.6	78.3438	48.6	10.9609	48.7	-10.9148	48.6	677.601	48.8	586.188	48.7	151.805
48.7	78.532	48.7	11.0273	48.8	-10.8906	48.7	677.699	48.9	586.302	48.8	151.832
48.8	78.6875	48.8	11.1094	48.9	-10.8398	48.8	677.796	49	586.43	48.9	151.855
48.9	78.8555	48.9	11.1828	49	-10.7781	48.9	677.894	49.1	586.559	49	151.876
49	79.0086	49	11.25	49.1	-10.718	49	677.967	49.2	586.676	49.1	151.905
49.1	79.1563	49.1	11.3211	49.2	-10.6476	49.1	678.059	49.3	586.797	49.2	151.93
49.2	79.2898	49.2	11.3906	49.3	-10.6094	49.2	678.152	49.4	586.906	49.3	151.954
49.3	79.4602	49.3	11.4805	49.4	-10.5672	49.3	678.27	49.5	587.008	49.4	151.968
49.4	79.5742	49.4	11.5555	49.5	-10.5312	49.4	678.362	49.6	587.122	49.5	152
49.5	79.7195	49.5	11.6406	49.6	-10.5	49.5	678.484	49.7	587.223	49.6	152.031
49.6	79.8602	49.6	11.7109	49.7	-10.4805	49.6	678.577	49.8	587.328	49.7	152.054
49.7	79.9961	49.7	11.7648	49.8	-10.4609	49.7	678.656	49.9	587.438	49.8	152.078
49.8	80.1102	49.8	11.8328	49.9	-10.4172	49.8	678.777	50	587.516	49.9	152.114
49.9	80.2492	49.9	11.9023	50	-10.3758	49.9	678.87	50.1	587.622	50	152.136
50	80.3844	50	11.9805	50.1	-10.3391	50	678.945	50.2	587.707	50.1	152.156
50.1	80.5422	50.1	12.0539	50.2	-10.2812	50.1	679.05	50.3	587.802	50.2	152.204
50.2	80.6563	50.2	12.1289	50.3	-10.2469	50.2	679.148	50.4	587.91	50.3	152.23
50.3	80.7898	50.3	12.168	50.4	-10.1953	50.3	679.248	50.5	588.005	50.4	152.265
50.4	80.9141	50.4	12.243	50.5	-10.1523	50.4	679.336	50.6	588.085	50.5	152.289
50.5	81.0906	50.5	12.3008	50.6	-10.1008	50.5	679.46	50.7	588.173	50.6	152.317
50.6	81.2312	50.6	12.382	50.7	-10.0383	50.6	679.566	50.8	588.253	50.7	152.347
50.7	81.3703	50.7	12.418	50.8	-9.97733	50.7	679.659	50.9	588.352	50.8	152.367
50.8	81.5008	50.8	12.5047	50.9	-9.92499	50.8	679.777	51	588.438	50.9	152.405
50.9	81.6414	50.9	12.5898	51	-9.88748	50.9	679.889	51.1	588.559	51	152.423
51	81.7773	51	12.6797	51.1	-9.8242	51	679.996	51.2	588.661	51.1	152.464
51.1	81.9094	51.1	12.7453	51.2	-9.77655	51.1	680.116	51.3	588.77	51.2	152.488
51.2	82.0477	51.2	12.8281	51.3	-9.73045	51.2	680.212	51.4	588.887	51.3	152.527
51.3	82.2	51.3	12.9031	51.4	-9.67654	51.3	680.319	51.5	588.969	51.4	152.555
51.4	82.3477	51.4	13.0313	51.5	-9.6328	51.4	680.406	51.6	589.056	51.5	152.609
51.5	82.5008	51.5	13.0828	51.6	-9.59373	51.5	680.518	51.7	589.163	51.6	152.648
51.6	82.632	51.6	13.1633	51.7	-9.53123	51.6	680.609	51.8	589.266	51.7	152.675
51.7	82.7781	51.7	13.2188	51.8	-9.47264	51.7	680.709	51.9	589.399	51.8	152.719
51.8	82.9305	51.8	13.3055	51.9	-9.44139	51.8	680.82	52	589.488	51.9	152.758
51.9	83.0813	51.9	13.3828	52	-9.37498	51.9	680.918	52.1	589.605	52	152.786
52	83.2195	52	13.4414	52.1	-9.33202	52	681	52.2	589.7	52.1	152.809
52.1	83.3633	52.1	13.5226	52.2	-9.26483	52.1	681.105	52.3	589.794	52.2	152.835
52.2	83.5086	52.2	13.6024	52.3	-9.19139	52.2	681.19	52.4	589.848	52.3	152.859
52.3	83.6641	52.3	13.6914	52.4	-9.14061	52.3	681.28	52.5	589.923	52.4	152.876
52.4	83.8094	52.4	13.7695	52.5	-9.12576	52.4	681.387	52.6	590.008	52.5	152.905
52.5	83.9422	52.5	13.8398	52.6	-9.06639	52.5	681.48	52.7	590.081	52.6	152.938
52.6	84.0734	52.6	13.9102	52.7	-8.99139	52.6	681.569	52.8	590.158	52.7	152.964
52.7	84.2148	52.7	13.9836	52.8	-8.94452	52.7	681.668	52.9	590.241	52.8	152.985
52.8	84.3406	52.8	14.0828	52.9	-8.90701	52.8	681.745	53	590.325	52.9	153.008
52.9	84.4617	52.9	14.1719	53	-8.84686	52.9	681.827	53.1	590.418	53	153.039
53	84.5695	53	14.243	53.1	-8.79295	53	681.906	53.2	590.477	53.1	153.07
53.1	84.7148	53.1	14.3203	53.2	-8.74921	53.1	681.998	53.3	590.571	53.2	153.109
53.2	84.8164	53.2	14.3937	53.3	-8.71092	53.2	682.098	53.4	590.66	53.3	153.141
53.3	84.9156	53.3	14.4609	53.4	-8.6328	53.3	682.186	53.5	590.755	53.4	153.163
53.4	85.0305	53.4	14.5078	53.5	-8.54295	53.4	682.297	53.6	590.84	53.5	153.184
53.5	85.118	53.5	14.5898	53.6	-8.45311	53.5	682.382	53.7	590.918	53.6	153.211
53.6	85.2508	53.6	14.6336	53.7	-8.41795	53.6	682.457	53.8	591.008	53.7	153.234
53.7	85.4375	53.7	14.7062	53.8	-8.41014	53.7	682.557	53.9	591.078	53.8	153.258
53.8	85.6172	53.8	14.7695	53.9	-8.36327	53.8	682.637	54	591.141	53.9	153.286
53.9	85.8438	53.9	14.8398	54	-8.30858	53.9	682.745	54.1	591.227	54	153.301
54	86.032	54	14.8836	54.1	-8.26639	54	682.807	54.2	591.282	54.1	153.316
54.1	86.1398	54.1	14.9414	54.2	-8.20624	54.1	682.882	54.3	591.379	54.2	153.337
54.2	86.2273	54.2	15	54.3	-8.18436	54.2	682.969	54.4	591.469	54.3	153.371
54.3	86.3797	54.3	15.0195	54.4	-8.16718	54.3	683.057	54.5	591.547	54.4	153.405
54.4	86.5078	54.4	15.0656	54.5	-8.15311	54.4	683.168	54.6	591.617	54.5	153.43
54.5	86.6367	54.5	15.1219	54.6	-8.14374	54.5	683.248	54.7	591.712	54.6	153.461
54.6	86.7852	54.6	15.1602	54.7	-8.13358	54.6	683.348	54.8	591.809	54.7	153.495
54.7	86.8992	54.7	15.2109	54.8	-8.12811	54.7	683.433	54.9	591.898	54.8	153.516
54.8	87.0203	54.8	15.2648	54.9	-8.0703	54.8	683.5	55	591.993	54.9	153.527
54.9	87.1516	54.9	15.3281	55	-8.03592	54.9	683.58	55.1	592.078	55	153.547
55	87.2937	55	15.3641	55.1	-8.01093	55	683.648	55.2	592.141	55.1	153.587
55.1	87.4406	55.1	15.4297	55.2	-7.96796	55.1	683.765	55.3	592.234	55.2	153.609
55.2	87.5594	55.2	15.4852	55.3	-7.91483	55.2	683.858	55.4	592.302	55.3	153.641
55.3	87.7	55.3	15.5539	55.4	-7.8828	55.3	683.957	55.5	592.384	55.4	153.68
55.4	87.8164	55.4	15.6453	55.5	-7.85545	55.4	684.054	55.6	592.472	55.5	153.711
55.5	87.9453	55.5	15.7141	55.6	-7.78827	55.5	684.12	55.7	592.556	55.6	153.73
55.6	88.0742	55.6	15.782	55.7	-7.73749	55.6	684.207	55.8	592.656	55.7	153.757
55.7	88.1953	55.7	15.8594	55.8	-7.70779	55.7	684.265	55.9	592.73	55.8	153.777
55.8	88.3406	55.8	15.9297	55.9	-7.6328	55.8	684.348	56	592.802	55.9	153.797
55.9	88.4648	55.9	16.0148	56	-7.58514	55.9	684.437	56.1	592.891	56	153.825
56	88.6133	56	16.0828	56.1	-7.54295	56	684.518	56.2	592.988	56.1	153.852
56.1	88.7781	56.1	16.1649	56.2	-7.50858	56.1	684.609	56.3	593.09	56.2	153.871
56.2	88.9109	56.2	16.2336	56.3	-7.45624	56.2	684.678	56.4	593.156	56.3	153.898
56.3	89.0516	56.3	16.2938	56.4	-7.42186	56.3	684.741	56.5	593.243	56.4	153.93
56.4	89.1828	56.4	16.3625	56.5	-7.36795	56.4	684.797	56.6	593.324	56.5	153.98
56.5	89.3289	56.5	16.4227	56.6	-7.30077	56.5	684.858	56.7	593.406	56.6	154.008
56.6	89.4961	56.6	16.5	56.7	-7.27655	56.6	684.938	56.8	593.477	56.7	154.051
56.7	89.6102	56.7	16.582	56.8	-7.24217	56.7	685.006	56.9	593.552	56.8	154.078
56.8	89.7492	56.8	16.6555	56.9	-7.17186	56.8	685.101	57	593.629	56.9	154.105
56.9	89.868	56.9	16.7266	57	-7.14452	56.9	685.168	57.1	593.712	57	154.126
57	90.032	57	16.782	57.1	-7.08202	57	685.253	57.2	593.777	57.1	154.148
57.1	90.1711	57.1	16.8594	57.2	-7.04999	57.1	685.328	57.3	593.852	57.2	154.18
57.2	90.2977	57.2	16.9266	57.3	-7.00389	57.2	685.389	57.4	593.918	57.3	154.214
57.3	90.4258	57.3	16.9953	57.4	-6.94843	57.3	685.472	57.5	594.005	57.4	154.227
57.4	90.5711	57.4	17.075	57.5	-6.90233	57.4	685.542	57.6	594.081	57.5	154.258
57.5	90.7312	57.5	17.1437	57.6	-6.84842	57.5	685.644	57.7	594.153	57.6	154.274
57.6	90.8703	57.6	17.243	57.7	-6.80312	57.6	685.738	57.8	594.227	57.7	154.301
57.7	90.9891	57.7	17.3086	57.8	-6.73436	57.7	685.807	57.9	594.305	57.8	154.316
57.8	91.125	57.8	17.3906	57.9	-6.69139	57.8	685.898	58	594.352	57.9	154.34
57.9	91.2625	57.9	17.4641	58	-6.64529	57.9	685.995	58.1	594.41	58	154.359
58	91.4016	58	17.532	58.1	-6.60858	58	686.085	58.2	594.485	58.1	154.384
58.1	91.5281	58.1	17.6094	58.2	-6.56248	58.1	686.186	58.3	594.551	58.2	154.402
58.2	91.6563	58.2	17.6766	58.3	-6.50389	58.2	686.277	58.4	594.624	58.3	154.425
58.3	91.782	58.3	17.75	58.4	-6.42186	58.3	686.362	58.5	594.665	58.4	154.449
58.4	91.9109	58.4	17.8351	58.5	-6.39452	58.4	686.445	58.6	594.722	58.5	154.477
58.5	92.0352	58.5	17.9102	58.6	-6.33592	58.5	686.527	58.7	594.782	58.6	154.495
58.6	92.1563	58.6	17.9734	58.7	-6.30077	58.6	686.605	58.8	594.867	58.7	154.503
58.7	92.2625	58.7	18.0422	58.8	-6.25389	58.7	686.69	58.9	594.926	58.8	154.516
58.8	92.3984	58.8	18.1336	58.9	-6.21014	58.8	686.773	59	594.993	58.9	154.544
58.9	92.5352	58.9	18.2023	59	-6.13983	58.9	686.848	59.1	595.047	59	154.559
59	92.6953	59	18.2742	59.1	-6.08592	59	686.913	59.2	595.117	59.1	154.578
59.1	92.8289	59.1	18.3398	59.2	-5.97968	59.1	686.959	59.3	595.184	59.2	154.597
59.2	92.9844	59.2	18.3984	59.3	-5.91483	59.2	687.008	59.4	595.238	59.3	154.595
59.3	93.125	59.3	18.4609	59.4	-5.88593	59.3	687.073	59.5	595.323	59.4	154.609
59.4	93.2852	59.4	18.5242	59.5	-5.84373	59.4	687.139	59.6	595.4	59.5	154.641
59.5	93.4187	59.5	18.582	59.6	-5.77811	59.5	687.202	59.7	595.472	59.6	154.672
59.6	93.5859	59.6	18.6094	59.7	-5.75624	59.6	687.266	59.8	595.547	59.7	154.691
59.7	93.7312	59.7	18.6602	59.8	-5.6953	59.7	687.348	59.9	595.617	59.8	154.706
59.8	93.9063	59.8	18.7219	59.9	-5.64061	59.8	687.401	60	595.677	59.9	154.719
59.9	94.0547	59.9	18.7625	60	-5.58202	59.9	687.449	60.1	595.762	60	154.738
60	94.2	60	18.8133	60.1	-5.54295	60	687.534	60.2	595.82	60.1	154.777
60.1	94.3359	60.1	18.8742	60.2	-5.50702	60.1	687.6	60.3	595.891	60.2	154.797
60.2	94.4766	60.2	18.9344	60.3	-5.47733	60.2	687.668	60.4	595.949	60.3	154.82
60.3	94.5977	60.3	18.9836	60.4	-5.43748	60.3	687.734	60.5	596.032	60.4	154.845
60.4	94.7344	60.4	19.0508	60.5	-5.36249	60.4	687.799	60.6	596.09	60.5	154.847
60.5	94.8555	60.5	19.1211	60.6	-5.31561	60.5	687.887	60.7	596.148	60.6	154.867
60.6	95.0086	60.6	19.1727	60.7	-5.25858	60.6	687.945	60.8	596.207	60.7	154.891
60.7	95.125	60.7	19.2422	60.8	-5.17889	60.7	688.006	60.9	596.277	60.8	154.91
60.8	95.2625	60.8	19.3039	60.9	-5.1328	60.8	688.086	61	596.355	60.9	154.925
60.9	95.3945	60.9	19.3953	61	-5.0742	60.9	688.163	61.1	596.438	61	154.954
61	95.5352	61	19.4609	61.1	-5.00389	61	688.238	61.2	596.517	61.1	154.969
61.1	95.6758	61.1	19.5469	61.2	-4.96483	61.1	688.319	61.3	596.609	61.2	154.984
61.2	95.8164	61.2	19.6094	61.3	-4.94139	61.2	688.374	61.4	596.668	61.3	155.008
61.3	95.9305	61.3	19.6992	61.4	-4.89452	61.3	688.438	61.5	596.73	61.4	155.036
61.4	96.0633	61.4	19.7742	61.5	-4.83905	61.4	688.507	61.6	596.797	61.5	155.054
61.5	96.2023	61.5	19.8547	61.6	-4.79295	61.5	688.569	61.7	596.867	61.6	155.078
61.6	96.3406	61.6	19.9344	61.7	-4.72968	61.6	688.617	61.8	596.949	61.7	155.098
61.7	96.4719	61.7	20.0344	61.8	-4.70311	61.7	688.695	61.9	597.016	61.8	155.114
61.8	96.607	61.8	20.1336	61.9	-4.67967	61.8	688.756	62	597.099	61.9	155.141
61.9	96.7266	61.9	20.2141	62	-4.6328	61.9	688.816	62.1	597.172	62	155.172
62	96.8508	62	20.282	62.1	-4.60155	62	688.886	62.2	597.238	62.1	155.195
62.1	96.9844	62.1	20.3711	62.2	-4.56248	62.1	688.967	62.3	597.304	62.2	155.211
62.2	97.1148	62.2	20.4149	62.3	-4.49921	62.2	689.035	62.4	597.357	62.3	155.234
62.3	97.2414	62.3	20.5148	62.4	-4.43045	62.3	689.124	62.5	597.402	62.4	155.243
62.4	97.3867	62.4	20.575	62.5	-4.34608	62.4	689.207	62.6	597.466	62.5	155.27
62.5	97.5352	62.5	20.6633	62.6	-4.26952	62.5	689.299	62.7	597.508	62.6	155.304
62.6	97.6773	62.6	20.743	62.7	-4.23045	62.6	689.374	62.8	597.547	62.7	155.309
62.7	97.8281	62.7	20.8008	62.8	-4.20779	62.7	689.445	62.9	597.617	62.8	155.336
62.8	97.9445	62.8	20.8516	62.9	-4.16405	62.8	689.52	63	597.673	62.9	155.364
62.9	98.0789	62.9	20.9133	63	-4.10077	62.9	689.597	63.1	597.734	63	155.391
63	98.207	63	20.9813	63.1	-4.03827	63	689.678	63.2	597.782	63.1	155.422
63.1	98.3602	63.1	21.0555	63.2	-3.96561	63.1	689.758	63.3	597.84	63.2	155.456
63.2	98.4883	63.2	21.1242	63.3	-3.92577	63.2	689.819	63.4	597.898	63.3	155.477
63.3	98.6414	63.3	21.2188	63.4	-3.8703	63.3	689.862	63.5	597.954	63.4	155.508
63.4	98.7891	63.4	21.2742	63.5	-3.82733	63.4	689.938	63.6	598.02	63.5	155.539
63.5	98.918	63.5	21.3351	63.6	-3.79764	63.5	690.008	63.7	598.073	63.6	155.575
63.6	99.0391	63.6	21.4149	63.7	-3.78046	63.6	690.088	63.8	598.145	63.7	155.609
63.7	99.1836	63.7	21.4836	63.8	-3.72264	63.7	690.155	63.9	598.199	63.8	155.641
63.8	99.3094	63.8	21.5242	63.9	-3.66718	63.8	690.222	64	598.258	63.9	155.667
63.9	99.4375	63.9	21.582	64	-3.60233	63.9	690.297	64.1	598.325	64	155.68
64	99.5547	64	21.6437	64.1	-3.54295	64	690.358	64.2	598.371	64.1	155.699
64.1	99.7117	64.1	21.7313	64.2	-3.50233	64.1	690.406	64.3	598.438	64.2	155.716
64.2	99.8672	64.2	21.8133	64.3	-3.45311	64.2	690.464	64.4	598.488	64.3	155.745
64.3	100.001	64.3	21.8742	64.4	-3.40701	64.3	690.511	64.5	598.544	64.4	155.77
64.4	100.129	64.4	21.9149	64.5	-3.3703	64.4	690.585	64.6	598.609	64.5	155.789
64.5	100.238	64.5	21.9836	64.6	-3.30858	64.5	690.624	64.7	598.66	64.6	155.804
64.6	100.379	64.6	22.0703	64.7	-3.22968	64.6	690.688	64.8	598.719	64.7	155.816
64.7	100.516	64.7	22.1141	64.8	-3.18358	64.7	690.729	64.9	598.758	64.8	155.845
64.8	100.664	64.8	22.175	64.9	-3.13983	64.8	690.765	65	598.813	64.9	155.871
64.9	100.821	64.9	22.2742	65	-3.06717	64.9	690.828	65.1	598.859	65	155.894
65	100.96	65	22.3594	65.1	-3.02342	65	690.889	65.2	598.922	65.1	155.918
65.1	101.107	65.1	22.4133	65.2	-2.97968	65.1	690.952	65.3	598.969	65.2	155.946
65.2	101.249	65.2	22.4734	65.3	-2.92577	65.2	691.047	65.4	599.015	65.3	155.956
65.3	101.387	65.3	22.5391	65.4	-2.85858	65.3	691.108	65.5	599.044	65.4	155.977
65.4	101.52	65.4	22.6016	65.5	-2.78514	65.4	691.176	65.6	599.09	65.5	155.997
65.5	101.676	65.5	22.6649	65.6	-2.69061	65.5	691.256	65.7	599.126	65.6	156.015
65.6	101.829	65.6	22.6945	65.7	-2.60545	65.6	691.328	65.8	599.18	65.7	156.039
65.7	101.977	65.7	22.7695	65.8	-2.53046	65.7	691.398	65.9	599.226	65.8	156.055
65.8	102.117	65.8	22.8055	65.9	-2.45779	65.8	691.498	66	599.274	65.9	156.077
65.9	102.254	65.9	22.8859	66	-2.39374	65.9	691.578	66.1	599.309	66	156.078
66	102.387	66	22.9344	66.1	-2.31952	66	691.659	66.2	599.379	66.1	156.093
66.1	102.54	66.1	22.9805	66.2	-2.25389	66.1	691.727	66.3	599.423	66.2	156.109
66.2	102.688	66.2	23.0226	66.3	-2.17186	66.2	691.773	66.4	599.469	66.3	156.129
66.3	102.813	66.3	23.0633	66.4	-2.12498	66.3	691.827	66.5	599.508	66.4	156.137
66.4	102.941	66.4	23.1141	66.5	-2.06952	66.4	691.887	66.6	599.559	66.5	156.145
66.5	103.095	66.5	23.1555	66.6	-2.01093	66.5	691.933	66.7	599.609	66.6	156.155
66.6	103.227	66.6	23.2109	66.7	-1.96014	66.6	691.98	66.8	599.653	66.7	156.177
66.7	103.359	66.7	23.2813	66.8	-1.88748	66.7	692.03	66.9	599.699	66.8	156.191
66.8	103.488	66.8	23.3445	66.9	-1.85545	66.8	692.09	67	599.75	66.9	156.206
66.9	103.605	66.9	23.3937	67	-1.79999	66.9	692.139	67.1	599.789	67	156.227
67	103.704	67	23.4656	67.1	-1.73436	67	692.18	67.2	599.836	67.1	156.245
67.1	103.831	67.1	23.5	67.2	-1.71014	67.1	692.226	67.3	599.876	67.2	156.253
67.2	103.973	67.2	23.5734	67.3	-1.64452	67.2	692.268	67.4	599.918	67.3	156.277
67.3	104.117	67.3	23.6367	67.4	-1.60858	67.3	692.316	67.5	599.949	67.4	156.313
67.4	104.241	67.4	23.7117	67.5	-1.57108	67.4	692.37	67.6	600.008	67.5	156.323
67.5	104.377	67.5	23.7938	67.6	-1.51405	67.5	692.43	67.7	600.055	67.6	156.333
67.6	104.496	67.6	23.8859	67.7	-1.48904	67.6	692.498	67.8	600.093	67.7	156.34
67.7	104.632	67.7	23.9492	67.8	-1.44843	67.7	692.547	67.9	600.141	67.8	156.355
67.8	104.773	67.8	23.9852	67.9	-1.41405	67.8	692.608	68	600.196	67.9	156.379
67.9	104.908	67.9	24.0539	68	-1.3703	67.9	692.668	68.1	600.238	68	156.395
68	105.047	68	24.1336	68.1	-1.33124	68	692.729	68.2	600.281	68.1	156.405
68.1	105.171	68.1	24.2023	68.2	-1.28592	68.1	692.777	68.3	600.323	68.2	156.43
68.2	105.282	68.2	24.2625	68.3	-1.24921	68.2	692.846	68.4	600.364	68.3	156.446
68.3	105.379	68.3	24.3281	68.4	-1.21483	68.3	692.906	68.5	600.398	68.4	156.456
68.4	105.488	68.4	24.3789	68.5	-1.17577	68.4	692.969	68.6	600.438	68.5	156.469
68.5	105.598	68.5	24.4258	68.6	-1.1078	68.5	693.018	68.7	600.485	68.6	156.495
68.6	105.727	68.6	24.4883	68.7	-1.04764	68.6	693.085	68.8	600.531	68.7	156.508
68.7	105.852	68.7	24.5555	68.8	-0.996078	68.7	693.137	68.9	600.59	68.8	156.505
68.8	105.988	68.8	24.6047	68.9	-0.945297	68.8	693.209	69	600.637	68.9	156.527
68.9	106.093	68.9	24.6531	69	-0.925766	68.9	693.266	69.1	600.688	69	156.547
69	106.224	69	24.7188	69.1	-0.8703	69	693.346	69.2	600.735	69.1	156.563
69.1	106.359	69.1	24.7648	69.2	-0.79686	69.1	693.438	69.3	600.789	69.2	156.57
69.2	106.491	69.2	24.8297	69.3	-0.726547	69.2	693.488	69.4	600.828	69.3	156.595
69.3	106.645	69.3	24.8859	69.4	-0.666397	69.3	693.557	69.5	600.867	69.4	156.616
69.4	106.79	69.4	24.9656	69.5	-0.61795	69.4	693.617	69.6	600.918	69.5	156.629
69.5	106.942	69.5	25.0226	69.6	-0.54686	69.5	693.69	69.7	600.973	69.6	156.655
69.6	107.03	69.6	25.0977	69.7	-0.503891	69.6	693.738	69.8	601.02	69.7	156.673
69.7	107.141	69.7	25.1727	69.8	-0.46405	69.7	693.807	69.9	601.07	69.8	156.699
69.8	107.258	69.8	25.25	69.9	-0.389832	69.8	693.879	70	601.129	69.9	156.726
69.9	107.387	69.9	25.3055	70	-0.327332	69.9	693.945	70.1	601.188	70	156.727
70	107.512	70	25.3664	70.1	-0.273422	70	694.003	70.2	601.243	70.1	156.758
70.1	107.617	70.1	25.418	70.2	-0.23436	70.1	694.066	70.3	601.292	70.2	156.774
70.2	107.738	70.2	25.4852	70.3	-0.217957	70.2	694.109	70.4	601.352	70.3	156.789
70.3	107.88	70.3	25.5344	70.4	-0.168732	70.3	694.17	70.5	601.411	70.4	156.82
70.4	108.05	70.4	25.6024	70.5	-0.124985	70.4	694.214	70.6	601.48	70.5	156.859
70.5	108.195	70.5	25.668	70.6	-0.0812378	70.5	694.277	70.7	601.539	70.6	156.879
70.6	108.329	70.6	25.7219	70.7	-0.0304565	70.6	694.327	70.8	601.595	70.7	156.91
70.7	108.508	70.7	25.782	70.8	0.015625	70.7	694.374	70.9	601.644	70.8	156.93
70.8	108.656	70.8	25.8445	70.9	0.0625	70.8	694.426	71	601.699	70.9	156.956
70.9	108.802	70.9	25.8984	71	0.122681	70.9	694.487	71.1	601.746	71	156.969
71	108.957	71	25.9641	71.1	0.167206	71	694.547	71.2	601.806	71.1	156.985
71.1	109.086	71.1	26.0438	71.2	0.227356	71.1	694.601	71.3	601.871	71.2	156.995
71.2	109.231	71.2	26.0851	71.3	0.304688	71.2	694.668	71.4	601.918	71.3	157.02
71.3	109.372	71.3	26.1336	71.4	0.3797	71.3	694.737	71.5	601.98	71.4	157.034
71.4	109.496	71.4	26.1961	71.5	0.41095	71.4	694.809	71.6	602.034	71.5	157.047
71.5	109.617	71.5	26.2766	71.6	0.457031	71.5	694.87	71.7	602.08	71.6	157.066
71.6	109.77	71.6	26.3328	71.7	0.508606	71.6	694.933	71.8	602.124	71.7	157.083
71.7	109.89	71.7	26.3859	71.8	0.542969	71.7	694.977	71.9	602.168	71.8	157.109
71.8	110.032	71.8	26.4539	71.9	0.625	71.8	695.026	72	602.207	71.9	157.129
71.9	110.137	71.9	26.4953	72	0.685181	71.9	695.086	72.1	602.243	72	157.155
72	110.227	72	26.5438	72.1	0.733612	72	695.144	72.2	602.277	72.1	157.165
72.1	110.36	72.1	26.6172	72.2	0.757813	72.1	695.202	72.3	602.328	72.2	157.191
72.2	110.57	72.2	26.6992	72.3	0.770325	72.2	695.27	72.4	602.364	72.3	157.211
72.3	110.739	72.3	26.7969	72.4	0.808594	72.3	695.319	72.5	602.379	72.4	157.23
72.4	110.926	72.4	26.8953	72.5	0.84375	72.4	695.382	72.6	602.413	72.5	157.245
72.5	111.11	72.5	26.9641	72.6	0.91095	72.5	695.438	72.7	602.454	72.6	157.258
72.6	111.22	72.6	27.0438	72.7	0.961731	72.6	695.503	72.8	602.488	72.7	157.277
72.7	111.363	72.7	27.1172	72.8	1.02734	72.7	695.554	72.9	602.524	72.8	157.294
72.8	111.504	72.8	27.1992	72.9	1.09375	72.8	695.593	73	602.559	72.9	157.316
72.9	111.656	72.9	27.2578	73	1.16095	72.9	695.647	73.1	602.593	73	157.328
73	111.77	73	27.3281	73.1	1.22266	73	695.695	73.2	602.634	73.1	157.356
73.1	111.887	73.1	27.4149	73.2	1.28204	73.1	695.77	73.3	602.68	73.2	157.383
73.2	112.027	73.2	27.4688	73.3	1.35156	73.2	695.838	73.4	602.727	73.3	157.398
73.3	112.145	73.3	27.5391	73.4	1.43048	73.3	695.882	73.5	602.766	73.4	157.405
73.4	112.266	73.4	27.5945	73.5	1.49689	73.4	695.938	73.6	602.816	73.5	157.415
73.5	112.416	73.5	27.6523	73.6	1.57892	73.5	695.987	73.7	602.857	73.6	157.43
73.6	112.566	73.6	27.7141	73.7	1.64453	73.6	696.039	73.8	602.905	73.7	157.449
73.7	112.707	73.7	27.743	73.8	1.72736	73.7	696.108	73.9	602.954	73.8	157.48
73.8	112.836	73.8	27.8008	73.9	1.8125	73.8	696.144	74	603	73.9	157.508
73.9	112.962	73.9	27.843	74	1.86798	73.9	696.219	74.1	603.034	74	157.527
74	113.09	74	27.9149	74.1	1.93359	74	696.265	74.2	603.063	74.1	157.547
74.1	113.238	74.1	27.9609	74.2	1.98907	74.1	696.327	74.3	603.109	74.2	157.559
74.2	113.387	74.2	28.0148	74.3	2.03516	74.2	696.398	74.4	603.156	74.3	157.595
74.3	113.523	74.3	28.075	74.4	2.07892	74.3	696.464	74.5	603.219	74.4	157.609
74.4	113.666	74.4	28.1289	74.5	2.15625	74.4	696.52	74.6	603.263	74.5	157.624
74.5	113.8	74.5	28.1945	74.6	2.21173	74.5	696.588	74.7	603.301	74.6	157.637
74.6	113.923	74.6	28.2789	74.7	2.25079	74.6	696.648	74.8	603.352	74.7	157.668
74.7	114.042	74.7	28.3516	74.8	2.29688	74.7	696.729	74.9	603.41	74.8	157.688
74.8	114.176	74.8	28.3937	74.9	2.32422	74.8	696.809	75	603.469	74.9	157.716
74.9	114.295	74.9	28.4734	75	2.36328	74.9	696.87	75.1	603.52	75	157.75
75	114.438	75	28.5461	75.1	2.41095	75	696.938	75.2	603.566	75.1	157.765
75.1	114.554	75.1	28.6141	75.2	2.46484	75.1	697.02	75.3	603.622	75.2	157.789
75.2	114.676	75.2	28.6719	75.3	2.51563	75.2	697.069	75.4	603.68	75.3	157.825
75.3	114.818	75.3	28.6992	75.4	2.59064	75.3	697.124	75.5	603.73	75.4	157.847
75.4	114.913	75.4	28.7726	75.5	2.65625	75.4	697.183	75.6	603.777	75.5	157.855
75.5	115.016	75.5	28.8445	75.6	2.70001	75.5	697.241	75.7	603.816	75.6	157.884
75.6	115.134	75.6	28.9102	75.7	2.76563	75.6	697.292	75.8	603.872	75.7	157.898
75.7	115.269	75.7	28.9641	75.8	2.82892	75.7	697.348	75.9	603.93	75.8	157.918
75.8	115.411	75.8	29.0125	75.9	2.90234	75.8	697.386	76	603.993	75.9	157.949
75.9	115.532	75.9	29.0508	76	2.95313	75.9	697.44	76.1	604.039	76	157.961
76	115.671	76	29.1141	76.1	3.00861	76	697.484	76.2	604.09	76.1	157.98
76.1	115.785	76.1	29.175	76.2	3.09375	76.1	697.516	76.3	604.134	76.2	158
76.2	115.93	76.2	29.2234	76.3	3.15393	76.2	697.573	76.4	604.199	76.3	158.015
76.3	116.063	76.3	29.2813	76.4	3.23752	76.3	697.616	76.5	604.238	76.4	158.039
76.4	116.188	76.4	29.3351	76.5	3.29456	76.4	697.656	76.6	604.284	76.5	158.055
76.5	116.348	76.5	29.3836	76.6	3.34375	76.5	697.714	76.7	604.325	76.6	158.077
76.6	116.491	76.6	29.4492	76.7	3.39923	76.6	697.758	76.8	604.367	76.7	158.09
76.7	116.634	76.7	29.5031	76.8	3.44531	76.7	697.819	76.9	604.418	76.8	158.105
76.8	116.77	76.8	29.5633	76.9	3.49609	76.8	697.862	77	604.466	76.9	158.102
76.9	116.887	76.9	29.6094	77	3.5672	76.9	697.902	77.1	604.503	77	158.121
77	117.039	77	29.6719	77.1	3.65234	77	697.933	77.2	604.552	77.1	158.141
77.1	117.18	77.1	29.7352	77.2	3.71954	77.1	697.988	77.3	604.602	77.2	158.155
77.2	117.316	77.2	29.793	77.3	3.75861	77.2	698.046	77.4	604.637	77.3	158.168
77.3	117.457	77.3	29.8351	77.4	3.80939	77.3	698.1	77.5	604.684	77.4	158.184
77.4	117.598	77.4	29.8906	77.5	3.84766	77.4	698.137	77.6	604.73	77.5	158.199
77.5	117.731	77.5	29.9227	77.6	3.89453	77.5	698.195	77.7	604.77	77.6	158.211
77.6	117.867	77.6	29.9953	77.7	3.97656	77.6	698.248	77.8	604.809	77.7	158.219
77.7	117.999	77.7	30.0438	77.8	4.03595	77.7	698.297	77.9	604.856	77.8	158.226
77.8	118.134	77.8	30.1211	77.9	4.11798	77.8	698.343	78	604.894	77.9	158.238
77.9	118.253	77.9	30.1719	78	4.17578	77.9	698.397	78.1	604.934	78	158.258
78	118.387	78	30.2258	78.1	4.23126	78	698.465	78.2	604.976	78.1	158.277
78.1	118.52	78.1	30.2742	78.2	4.26172	78.1	698.52	78.3	605.013	78.2	158.289
78.2	118.644	78.2	30.3203	78.3	4.32422	78.2	698.58	78.4	605.059	78.3	158.305
78.3	118.77	78.3	30.3672	78.4	4.3797	78.3	698.624	78.5	605.095	78.4	158.309
78.4	118.906	78.4	30.4344	78.5	4.45001	78.4	698.668	78.6	605.144	78.5	158.32
78.5	119.055	78.5	30.4953	78.6	4.51172	78.5	698.734	78.7	605.188	78.6	158.34
78.6	119.207	78.6	30.5586	78.7	4.55469	78.6	698.799	78.8	605.23	78.7	158.359
78.7	119.355	78.7	30.6367	78.8	4.60315	78.7	698.859	78.9	605.266	78.8	158.379
78.8	119.525	78.8	30.7156	78.9	4.65939	78.8	698.913	79	605.305	78.9	158.391
78.9	119.652	78.9	30.7648	79	4.70782	78.9	698.979	79.1	605.343	79	158.41
79	119.802	79	30.8133	79.1	4.73907	79	699.023	79.2	605.384	79.1	158.422
79.1	119.957	79.1	30.8937	79.2	4.80157	79.1	699.066	79.3	605.427	79.2	158.441
79.2	120.098	79.2	30.9734	79.3	4.875	79.2	699.124	79.4	605.469	79.3	158.461
79.3	120.266	79.3	31.0555	79.4	4.93048	79.3	699.188	79.5	605.515	79.4	158.476
79.4	120.438	79.4	31.1437	79.5	5.00391	79.4	699.245	79.6	605.544	79.5	158.493
79.5	120.586	79.5	31.2234	79.6	5.05939	79.5	699.299	79.7	605.585	79.6	158.515
79.6	120.727	79.6	31.2961	79.7	5.1297	79.6	699.343	79.8	605.622	79.7	158.527
79.7	120.865	79.7	31.3477	79.8	5.19531	79.7	699.394	79.9	605.657	79.8	158.536
79.8	121.003	79.8	31.4149	79.9	5.24219	79.8	699.445	80	605.687	79.9	158.563
79.9	121.145	79.9	31.4641	80	5.3172	79.9	699.477	80.1	605.711	80	158.577
80	121.282	80	31.5516	80.1	5.37579	80	699.515	80.2	605.738	80.1	158.59
80.1	121.406	80.1	31.6141	80.2	5.48438	80.1	699.557	80.3	605.781	80.2	158.609
80.2	121.527	80.2	31.6867	80.3	5.53125	80.2	699.593	80.4	605.813	80.3	158.624
80.3	121.668	80.3	31.743	80.4	5.60315	80.3	699.648	80.5	605.859	80.4	158.653
80.4	121.782	80.4	31.8039	80.5	5.67657	80.4	699.698	80.6	605.905	80.5	158.663
80.5	121.898	80.5	31.8398	80.6	5.73752	80.5	699.738	80.7	605.939	80.6	158.673
80.6	122	80.6	31.8758	80.7	5.79456	80.6	699.807	80.8	605.98	80.7	158.711
80.7	122.093	80.7	31.925	80.8	5.86328	80.7	699.843	80.9	606.015	80.8	158.73
80.8	122.2	80.8	31.993	80.9	5.90234	80.8	699.887	81	606.044	80.9	158.75
80.9	122.302	80.9	32.0703	81	5.95782	80.9	699.925	81.1	606.073	81	158.77
81	122.425	81	32.1125	81.1	6.00861	81	699.945	81.2	606.102	81.1	158.784
81.1	122.552	81.1	32.1727	81.2	6.0625	81.1	699.988	81.3	606.129	81.2	158.797
81.2	122.671	81.2	32.2305	81.3	6.12268	81.2	700.037	81.4	606.165	81.3	158.813
81.3	122.794	81.3	32.2891	81.4	6.19531	81.3	700.09	81.5	606.195	81.4	158.828
81.4	122.906	81.4	32.3594	81.5	6.23907	81.4	700.124	81.6	606.223	81.5	158.852
81.5	123.035	81.5	32.4031	81.6	6.27344	81.5	700.159	81.7	606.253	81.6	158.879
81.6	123.156	81.6	32.4641	81.7	6.32422	81.6	700.202	81.8	606.297	81.7	158.891
81.7	123.27	81.7	32.5195	81.8	6.37109	81.7	700.246	81.9	606.333	81.8	158.91
81.8	123.375	81.8	32.5828	81.9	6.42346	81.8	700.284	82	606.356	81.9	158.93
81.9	123.504	81.9	32.6406	82	6.49219	81.9	700.331	82.1	606.391	82	158.949
82	123.645	82	32.6828	82.1	6.55469	82	700.374	82.2	606.437	82.1	158.98
82.1	123.79	82.1	32.7547	82.2	6.59845	82.1	700.428	82.3	606.473	82.2	159
82.2	123.891	82.2	32.7922	82.3	6.64923	82.2	700.46	82.4	606.503	82.3	159.02
82.3	124.023	82.3	32.8445	82.4	6.6875	82.3	700.496	82.5	606.535	82.4	159.039
82.4	124.192	82.4	32.8984	82.5	6.71954	82.4	700.534	82.6	606.583	82.5	159.059
82.5	124.328	82.5	32.9461	82.6	6.77734	82.5	700.59	82.7	606.614	82.6	159.078
82.6	124.442	82.6	32.9953	82.7	6.83203	82.6	700.639	82.8	606.66	82.7	159.097
82.7	124.593	82.7	33.0438	82.8	6.89923	82.7	700.702	82.9	606.714	82.8	159.117
82.8	124.758	82.8	33.1016	82.9	6.95313	82.8	700.741	83	606.758	82.9	159.145
82.9	124.906	82.9	33.1633	83	7.02814	82.9	700.777	83.1	606.794	83	159.148
83	125.055	83	33.2234	83.1	7.13751	83	700.823	83.2	606.828	83.1	159.18
83.1	125.146	83.1	33.2844	83.2	7.19141	83.1	700.87	83.3	606.864	83.2	159.195
83.2	125.238	83.2	33.3328	83.3	7.25159	83.2	700.918	83.4	606.913	83.3	159.219
83.3	125.362	83.3	33.3789	83.4	7.3125	83.3	700.995	83.5	606.954	83.4	159.235
83.4	125.465	83.4	33.4461	83.5	7.38281	83.4	701.046	83.6	606.988	83.5	159.245
83.5	125.574	83.5	33.4922	83.6	7.44611	83.5	701.088	83.7	607.042	83.6	159.27
83.6	125.705	83.6	33.543	83.7	7.51642	83.6	701.137	83.8	607.083	83.7	159.289
83.7	125.836	83.7	33.6164	83.8	7.59845	83.7	701.195	83.9	607.117	83.8	159.305
83.8	125.949	83.8	33.668	83.9	7.66095	83.8	701.27	84	607.165	83.9	159.316
83.9	126.052	83.9	33.7234	84	7.71954	83.9	701.316	84.1	607.211	84	159.34
84	126.199	84	33.8039	84.1	7.77344	84	701.358	84.2	607.245	84.1	159.343
84.1	126.339	84.1	33.8711	84.2	7.79297	84.1	701.425	84.3	607.282	84.2	159.364
84.2	126.477	84.2	33.9149	84.3	7.85315	84.2	701.469	84.4	607.32	84.3	159.374
84.3	126.638	84.3	33.9727	84.4	7.90625	84.3	701.549	84.5	607.359	84.4	159.376
84.4	126.785	84.4	34.0344	84.5	7.96954	84.4	701.609	84.6	607.398	84.5	159.391
84.5	126.923	84.5	34.0945	84.6	8.01877	84.5	701.663	84.7	607.43	84.6	159.405
84.6	127.043	84.6	34.1555	84.7	8.04376	84.6	701.717	84.8	607.466	84.7	159.418
84.7	127.176	84.7	34.2234	84.8	8.10626	84.7	701.761	84.9	607.484	84.8	159.434
84.8	127.321	84.8	34.2891	84.9	8.15393	84.8	701.816	85	607.524	84.9	159.441
84.9	127.457	84.9	34.3563	85	8.19531	84.9	701.877	85.1	607.554	85	159.473
85	127.622	85	34.4055	85.1	8.25861	85	701.921	85.2	607.583	85.1	159.48
85.1	127.75	85.1	34.4688	85.2	8.33203	85.1	701.969	85.3	607.609	85.2	159.5
85.2	127.862	85.2	34.5242	85.3	8.38751	85.2	702.042	85.4	607.645	85.3	159.512
85.3	128.001	85.3	34.5656	85.4	8.46094	85.3	702.105	85.5	607.675	85.4	159.527
85.4	128.137	85.4	34.6141	85.5	8.52502	85.4	702.168	85.6	607.684	85.5	159.539
85.5	128.251	85.5	34.6602	85.6	8.59375	85.5	702.226	85.7	607.719	85.6	159.554
85.6	128.394	85.6	34.7023	85.7	8.68359	85.6	702.268	85.8	607.755	85.7	159.555
85.7	128.547	85.7	34.7547	85.8	8.76642	85.7	702.323	85.9	607.777	85.8	159.57
85.8	128.692	85.8	34.7891	85.9	8.85156	85.8	702.367	86	607.809	85.9	159.585
85.9	128.816	85.9	34.843	86	8.91174	85.9	702.437	86.1	607.84	86	159.583
86	128.957	86	34.8719	86.1	8.98438	86	702.484	86.2	607.852	86.1	159.59
86.1	129.083	86.1	34.9227	86.2	9.02032	86.1	702.518	86.3	607.891	86.2	159.605
86.2	129.219	86.2	34.9758	86.3	9.07892	86.2	702.566	86.4	607.925	86.3	159.609
86.3	129.355	86.3	35.0195	86.4	9.16406	86.3	702.624	86.5	607.947	86.4	159.626
86.4	129.493	86.4	35.0555	86.5	9.20782	86.4	702.666	86.6	607.984	86.5	159.636
86.5	129.637	86.5	35.0898	86.6	9.26642	86.5	702.719	86.7	608.016	86.6	159.648
86.6	129.797	86.6	35.1242	86.7	9.3125	86.6	702.765	86.8	608.034	86.7	159.66
86.7	129.926	86.7	35.1727	86.8	9.34375	86.7	702.804	86.9	608.075	86.8	159.677
86.8	130.059	86.8	35.2141	86.9	9.38751	86.8	702.827	87	608.093	86.9	159.691
86.9	130.2	86.9	35.2625	87	9.46252	86.9	702.862	87.1	608.114	87	159.706
87	130.323	87	35.3203	87.1	9.52344	87	702.898	87.2	608.148	87.1	159.719
87.1	130.465	87.1	35.3789	87.2	9.59064	87.1	702.945	87.3	608.172	87.2	159.73
87.2	130.605	87.2	35.4414	87.3	9.65704	87.2	702.969	87.4	608.199	87.3	159.745
87.3	130.748	87.3	35.5047	87.4	9.7258	87.3	703.018	87.5	608.223	87.4	159.763
87.4	130.898	87.4	35.5734	87.5	9.80237	87.4	703.054	87.6	608.25	87.5	159.781
87.5	131.047	87.5	35.6453	87.6	9.86798	87.5	703.098	87.7	608.284	87.6	159.804
87.6	131.183	87.6	35.6945	87.7	9.93359	87.6	703.124	87.8	608.318	87.7	159.816
87.7	131.337	87.7	35.7547	87.8	10.0313	87.7	703.166	87.9	608.355	87.8	159.84
87.8	131.477	87.8	35.8008	87.9	10.1031	87.8	703.207	88	608.384	87.9	159.856
87.9	131.624	87.9	35.8789	88	10.1641	87.9	703.253	88.1	608.413	88	159.871
88	131.766	88	35.9445	88.1	10.2031	88	703.312	88.2	608.434	88.1	159.891
88.1	131.934	88.1	36.032	88.2	10.2633	88.1	703.355	88.3	608.464	88.2	159.917
88.2	132.071	88.2	36.0781	88.3	10.3242	88.2	703.379	88.4	608.493	88.3	159.938
88.3	132.207	88.3	36.1453	88.4	10.3758	88.3	703.44	88.5	608.527	88.4	159.957
88.4	132.336	88.4	36.1945	88.5	10.4336	88.4	703.469	88.6	608.563	88.5	159.988
88.5	132.445	88.5	36.25	88.6	10.4742	88.5	703.53	88.7	608.585	88.6	160.016
88.6	132.583	88.6	36.2859	88.7	10.5234	88.6	703.578	88.8	608.617	88.7	160.031
88.7	132.707	88.7	36.3547	88.8	10.5898	88.7	703.639	88.9	608.653	88.8	160.051
88.8	132.828	88.8	36.4227	88.9	10.6344	88.8	703.688	89	608.675	88.9	160.066
88.9	132.957	88.9	36.4805	89	10.7	88.9	703.734	89.1	608.712	89	160.078
89	133.083	89	36.5422	89.1	10.7766	89	703.787	89.2	608.738	89.1	160.106
89.1	133.199	89.1	36.6094	89.2	10.8141	89.1	703.836	89.3	608.774	89.2	160.133
89.2	133.331	89.2	36.6531	89.3	10.8633	89.2	703.898	89.4	608.796	89.3	160.16
89.3	133.462	89.3	36.7023	89.4	10.8906	89.3	703.959	89.5	608.825	89.4	160.187
89.4	133.578	89.4	36.7625	89.5	10.9344	89.4	704.02	89.6	608.843	89.5	160.211
89.5	133.695	89.5	36.8203	89.6	10.9938	89.5	704.069	89.7	608.867	89.6	160.25
89.6	133.833	89.6	36.8789	89.7	11.0578	89.6	704.129	89.8	608.903	89.7	160.277
89.7	133.969	89.7	36.9344	89.8	11.1031	89.7	704.163	89.9	608.934	89.8	160.297
89.8	134.105	89.8	36.9836	89.9	11.1523	89.8	704.202	90	608.956	89.9	160.328
89.9	134.234	89.9	37.0391	90	11.2047	89.9	704.256	90.1	608.988	90	160.356
90	134.364	90	37.0945	90.1	11.2461	90	704.297	90.2	609.024	90.1	160.371
90.1	134.491	90.1	37.1328	90.2	11.293	90.1	704.348	90.3	609.051	90.2	160.398
90.2	134.634	90.2	37.1797	90.3	11.368	90.2	704.397	90.4	609.073	90.3	160.43
90.3	134.738	90.3	37.2305	90.4	11.4336	90.3	704.449	90.5	609.102	90.4	160.456
90.4	134.843	90.4	37.2648	90.5	11.4969	90.4	704.498	90.6	609.129	90.5	160.485
90.5	134.955	90.5	37.3086	90.6	11.575	90.5	704.559	90.7	609.16	90.6	160.495
90.6	135.105	90.6	37.3641	90.7	11.6258	90.6	704.593	90.8	609.188	90.7	160.52
90.7	135.204	90.7	37.4297	90.8	11.6766	90.7	704.647	90.9	609.223	90.8	160.555
90.8	135.297	90.8	37.4734	90.9	11.7274	90.8	704.695	91	609.253	90.9	160.566
90.9	135.418	90.9	37.5148	91	11.7859	90.9	704.745	91.1	609.294	91	160.598
91	135.524	91	37.5703	91.1	11.8602	91	704.777	91.2	609.328	91.1	160.629
91.1	135.644	91.1	37.6172	91.2	11.9219	91.1	704.83	91.3	609.364	91.2	160.655
91.2	135.755	91.2	37.6797	91.3	11.9609	91.2	704.874	91.4	609.386	91.3	160.673
91.3	135.855	91.3	37.7352	91.4	12.0211	91.3	704.918	91.5	609.418	91.4	160.691
91.4	135.977	91.4	37.7922	91.5	12.0672	91.4	704.956	91.6	609.454	91.5	160.711
91.5	136.11	91.5	37.8641	91.6	12.1523	91.5	704.987	91.7	609.473	91.6	160.745
91.6	136.253	91.6	37.9219	91.7	12.2274	91.6	705.047	91.8	609.484	91.7	160.766
91.7	136.384	91.7	37.9766	91.8	12.3172	91.7	705.093	91.9	609.529	91.8	160.784
91.8	136.534	91.8	38.0391	91.9	12.3828	91.8	705.144	92	609.563	91.9	160.794
91.9	136.664	91.9	38.1063	92	12.4656	91.9	705.19	92.1	609.578	92	160.816
92	136.782	92	38.1633	92.1	12.5477	92	705.238	92.2	609.616	92.1	160.823
92.1	136.918	92.1	38.2109	92.2	12.618	92.1	705.287	92.3	609.653	92.2	160.833
92.2	137.027	92.2	38.2742	92.3	12.6992	92.2	705.331	92.4	609.688	92.3	160.844
92.3	137.153	92.3	38.3351	92.4	12.7906	92.3	705.367	92.5	609.714	92.4	160.847
92.4	137.289	92.4	38.3984	92.5	12.8602	92.4	705.413	92.6	609.743	92.5	160.856
92.5	137.433	92.5	38.4539	92.6	12.9414	92.5	705.449	92.7	609.774	92.6	160.866
92.6	137.555	92.6	38.5195	92.7	12.9969	92.6	705.491	92.8	609.816	92.7	160.876
92.7	137.68	92.7	38.5851	92.8	13.0359	92.7	705.523	92.9	609.845	92.8	160.878
92.8	137.797	92.8	38.6367	92.9	13.0984	92.8	705.554	93	609.886	92.9	160.874
92.9	137.926	92.9	38.7234	93	13.1797	92.9	705.593	93.1	609.91	93	160.884
93	138.071	93	38.7891	93.1	13.2469	93	705.637	93.2	609.938	93.1	160.874
93.1	138.195	93.1	38.8445	93.2	13.3484	93.1	705.687	93.3	609.969	93.2	160.864
93.2	138.336	93.2	38.8937	93.3	13.407	93.2	705.714	93.4	609.993	93.3	160.874
93.3	138.505	93.3	38.9539	93.4	13.4695	93.3	705.748	93.5	610.023	93.4	160.876
93.4	138.637	93.4	39.0195	93.5	13.5352	93.4	705.792	93.6	610.063	93.5	160.886
93.5	138.777	93.5	39.0781	93.6	13.6063	93.5	705.823	93.7	610.095	93.6	160.886
93.6	138.874	93.6	39.1406	93.7	13.6883	93.6	705.855	93.8	610.136	93.7	160.884
93.7	138.996	93.7	39.1945	93.8	13.7781	93.7	705.894	93.9	610.165	93.8	160.874
93.8	139.13	93.8	39.2234	93.9	13.8484	93.8	705.926	94	610.195	93.9	160.864
93.9	139.246	93.9	39.2742	94	13.9094	93.9	705.976	94.1	610.223	94	160.874
94	139.406	94	39.3156	94.1	13.9586	94	706.003	94.2	610.253	94.1	160.864
94.1	139.547	94.1	39.3758	94.2	14.043	94.1	706.049	94.3	610.274	94.2	160.866
94.2	139.697	94.2	39.4297	94.3	14.0672	94.2	706.093	94.4	610.305	94.3	160.876
94.3	139.823	94.3	39.4836	94.4	14.1375	94.3	706.137	94.5	610.335	94.4	160.878
94.4	139.926	94.4	39.532	94.5	14.1883	94.4	706.175	94.6	610.359	94.5	160.874
94.5	140.032	94.5	39.593	94.6	14.2586	94.5	706.202	94.7	610.384	94.6	160.884
94.6	140.168	94.6	39.6453	94.7	14.3008	94.6	706.256	94.8	610.405	94.7	160.886
94.7	140.331	94.7	39.6914	94.8	14.3633	94.7	706.292	94.9	610.434	94.8	160.887
94.8	140.43	94.8	39.7336	94.9	14.3953	94.8	706.336	95	610.464	94.9	160.898
94.9	140.583	94.9	39.7742	95	14.4625	94.9	706.394	95.1	610.493	95	160.898
95	140.702	95	39.8133	95.1	14.5313	95	706.413	95.2	610.52	95.1	160.903
95.1	140.816	95.1	39.8547	95.2	14.5867	95.1	706.445	95.3	610.539	95.2	160.91
95.2	140.965	95.2	39.9297	95.3	14.6375	95.2	706.488	95.4	610.575	95.3	160.922
95.3	141.091	95.3	40	95.4	14.6766	95.3	706.53	95.5	610.605	95.4	160.941
95.4	141.238	95.4	40.0555	95.5	14.7617	95.4	706.573	95.6	610.626	95.5	160.941
95.5	141.387	95.5	40.1125	95.6	14.8219	95.5	706.605	95.7	610.641	95.6	160.961
95.6	141.493	95.6	40.1727	95.7	14.8781	95.6	706.637	95.8	610.655	95.7	160.969
95.7	141.629	95.7	40.2188	95.8	14.943	95.7	706.675	95.9	610.673	95.8	161
95.8	141.777	95.8	40.2844	95.9	14.9805	95.8	706.717	96	610.699	95.9	161.012
95.9	141.906	95.9	40.3328	96	15.0555	95.9	706.753	96.1	610.714	96	161.034
96	142.024	96	40.3789	96.1	15.1258	96	706.789	96.2	610.735	96.1	161.039
96.1	142.163	96.1	40.4344	96.2	15.1883	96.1	706.823	96.3	610.75	96.2	161.059
96.2	142.294	96.2	40.4805	96.3	15.2586	96.2	706.855	96.4	610.773	96.3	161.078
96.3	142.418	96.3	40.5344	96.4	15.3242	96.3	706.897	96.5	610.794	96.4	161.095
96.4	142.562	96.4	40.5945	96.5	15.4117	96.4	706.921	96.6	610.813	96.5	161.109
96.5	142.7	96.5	40.6602	96.6	15.4563	96.5	706.952	96.7	610.847	96.6	161.124
96.6	142.845	96.6	40.7188	96.7	15.5211	96.6	706.996	96.8	610.871	96.7	161.148
96.7	142.952	96.7	40.7695	96.8	15.5984	96.7	707.023	96.9	610.884	96.8	161.168
96.8	143.091	96.8	40.7891	96.9	15.6719	96.8	707.07	97	610.913	96.9	161.199
96.9	143.227	96.9	40.8477	97	15.7399	96.9	707.105	97.1	610.942	97	161.23
97	143.367	97	40.9031	97.1	15.8008	97	707.127	97.2	610.961	97.1	161.25
97.1	143.508	97.1	40.9445	97.2	15.8563	97.1	707.175	97.3	610.976	97.2	161.266
97.2	143.634	97.2	40.9852	97.3	15.9102	97.2	707.207	97.4	610.993	97.3	161.281
97.3	143.766	97.3	41.0344	97.4	15.9852	97.3	707.257	97.5	611.016	97.4	161.296
97.4	143.918	97.4	41.0828	97.5	16.0359	97.4	707.287	97.6	611.046	97.5	161.313
97.5	144.059	97.5	41.1437	97.6	16.075	97.5	707.323	97.7	611.063	97.6	161.327
97.6	144.207	97.6	41.2039	97.7	16.1375	97.6	707.367	97.8	611.085	97.7	161.34
97.7	144.336	97.7	41.2578	97.8	16.2078	97.7	707.405	97.9	611.114	97.8	161.348
97.8	144.473	97.8	41.3133	97.9	16.2664	97.8	707.448	98	611.148	97.9	161.359
97.9	144.581	97.9	41.3664	98	16.332	97.9	707.503	98.1	611.16	98	161.379
98	144.715	98	41.4149	98.1	16.3953	98	707.539	98.2	611.175	98.1	161.386
98.1	144.833	98.1	41.4562	98.2	16.4578	98.1	707.573	98.3	611.192	98.2	161.395
98.2	144.954	98.2	41.493	98.3	16.5164	98.2	707.616	98.4	611.219	98.3	161.398
98.3	145.062	98.3	41.5391	98.4	16.582	98.3	707.656	98.5	611.247	98.4	161.413
98.4	145.164	98.4	41.5851	98.5	16.6523	98.4	707.702	98.6	611.265	98.5	161.438
98.5	145.282	98.5	41.6336	98.6	16.7399	98.5	707.738	98.7	611.297	98.6	161.454
98.6	145.382	98.6	41.6758	98.7	16.7977	98.6	707.787	98.8	611.333	98.7	161.48
98.7	145.481	98.7	41.7234	98.8	16.868	98.7	707.843	98.9	611.355	98.8	161.492
98.8	145.601	98.8	41.7695	98.9	16.9305	98.8	707.874	99	611.384	98.9	161.512
98.9	145.748	98.9	41.8234	99	16.9992	98.9	707.906	99.1	611.405	99	161.527
99	145.898	99	41.8719	99.1	17.075	99	707.945	99.2	611.439	99.1	161.544
99.1	146.042	99.1	41.9266	99.2	17.1422	99.1	707.987	99.3	611.464	99.2	161.57
99.2	146.156	99.2	41.9562	99.3	17.2227	99.2	708.023	99.4	611.493	99.3	161.585
99.3	146.302	99.3	41.9961	99.4	17.2977	99.3	708.059	99.5	611.527	99.4	161.59
99.4	146.445	99.4	42.0391	99.5	17.3367	99.4	708.093	99.6	611.554	99.5	161.606
99.5	146.595	99.5	42.0828	99.6	17.4023	99.5	708.139	99.7	611.588	99.6	161.616
99.6	146.722	99.6	42.1242	99.7	17.4539	99.6	708.191	99.8	611.616	99.7	161.609
99.7	146.833	99.7	42.1844	99.8	17.5164	99.7	708.227	99.9	611.637	99.8	161.624
99.8	146.972	99.8	42.2383	99.9	17.575	99.8	708.284	100	611.668	99.9	161.641
99.9	147.102	99.9	42.2938	100	17.6484	99.9	708.323	100.1	611.684	100	161.663
100	147.21	100	42.3351	100.1	17.7008	100	708.358	100.2	611.719	100.1	161.668
100.1	147.333	100.1	42.3789	100.2	17.7469	100.1	708.406	100.3	611.745	100.2	161.673
100.2	147.423	100.2	42.4539	100.3	17.8008	100.2	708.452	100.4	611.767	100.3	161.691
100.3	147.573	100.3	42.5031	100.4	17.8563	100.3	708.488	100.5	611.801	100.4	161.711
100.4	147.695	100.4	42.5828	100.5	17.9188	100.4	708.537	100.6	611.84	100.5	161.726
100.5	147.813	100.5	42.6633	100.6	17.9891	100.5	708.573	100.7	611.862	100.6	161.735
100.6	147.945	100.6	42.7234	100.7	18.0477	100.6	708.617	100.8	611.884	100.7	161.75
100.7	148.112	100.7	42.7891	100.8	18.1133	100.7	708.655	100.9	611.918	100.8	161.765
100.8	148.251	100.8	42.8563	100.9	18.1617	100.8	708.709	101	611.938	100.9	161.774
100.9	148.391	100.9	42.9055	101	18.2031	100.9	708.753	101.1	611.973	101	161.784
101	148.542	101	42.9734	101.1	18.2227	101	708.789	101.2	611.995	101.1	161.809
101.1	148.673	101.1	43.0586	101.2	18.2516	101.1	708.843	101.3	612.013	101.2	161.825
101.2	148.812	101.2	43.132	101.3	18.3203	101.2	708.894	101.4	612.039	101.3	161.832
101.3	148.962	101.3	43.2039	101.4	18.3758	101.3	708.928	101.5	612.055	101.4	161.847
101.4	149.086	101.4	43.2813	101.5	18.4297	101.4	708.972	101.6	612.085	101.5	161.855
101.5	149.223	101.5	43.3281	101.6	18.4774	101.5	709.008	101.7	612.109	101.6	161.867
101.6	149.352	101.6	43.3953	101.7	18.5211	101.6	709.034	101.8	612.134	101.7	161.884
101.7	149.452	101.7	43.4445	101.8	18.5789	101.7	709.054	101.9	612.168	101.8	161.891
101.8	149.566	101.8	43.493	101.9	18.6211	101.8	709.098	102	612.191	101.9	161.913
101.9	149.692	101.9	43.5391	102	18.6688	101.9	709.136	102.1	612.207	102	161.93
102	149.792	102	43.593	102.1	18.7305	102	709.17	102.2	612.247	102.1	161.949
102.1	149.891	102.1	43.6531	102.2	18.8102	102.1	709.202	102.3	612.265	102.2	161.966
102.2	150.016	102.2	43.7141	102.3	18.8906	102.2	709.238	102.4	612.297	102.3	161.98
102.3	150.153	102.3	43.7625	102.4	18.9461	102.3	709.28	102.5	612.325	102.4	161.984
102.4	150.265	102.4	43.8008	102.5	19.0211	102.4	709.323	102.6	612.335	102.5	162.008
102.5	150.384	102.5	43.8445	102.6	19.0938	102.5	709.367	102.7	612.367	102.6	162.024
102.6	150.484	102.6	43.9055	102.7	19.157	102.6	709.413	102.8	612.384	102.7	162.046
102.7	150.591	102.7	43.9539	102.8	19.2352	102.7	709.445	102.9	612.403	102.8	162.059
102.8	150.719	102.8	43.9836	102.9	19.2859	102.8	709.476	103	612.425	102.9	162.078
102.9	150.851	102.9	44.0391	103	19.3445	102.9	709.498	103.1	612.446	103	162.095
103	150.966	103	44.0945	103.1	19.4383	103	709.527	103.2	612.461	103.1	162.105
103.1	151.132	103.1	44.1555	103.2	19.4805	103.1	709.569	103.3	612.484	103.2	162.124
103.2	151.274	103.2	44.2234	103.3	19.5524	103.2	709.586	103.4	612.493	103.3	162.129
103.3	151.41	103.3	44.2813	103.4	19.6328	103.3	709.612	103.5	612.512	103.4	162.148
103.4	151.516	103.4	44.332	103.5	19.6961	103.4	709.655	103.6	612.539	103.5	162.176
103.5	151.641	103.5	44.3742	103.6	19.75	103.5	709.683	103.7	612.563	103.6	162.184
103.6	151.746	103.6	44.4227	103.7	19.8219	103.6	709.717	103.8	612.582	103.7	162.211
103.7	151.872	103.7	44.4734	103.8	19.8906	103.7	709.777	103.9	612.605	103.8	162.23
103.8	152.023	103.8	44.5586	103.9	19.9508	103.8	709.823	104	612.626	103.9	162.245
103.9	152.141	103.9	44.6328	104	20.0117	103.9	709.848	104.1	612.644	104	162.255
104	152.258	104	44.675	104.1	20.0719	104	709.889	104.2	612.665	104.1	162.27
104.1	152.402	104.1	44.7352	104.2	20.1211	104.1	709.913	104.3	612.683	104.2	162.284
104.2	152.501	104.2	44.8039	104.3	20.1766	104.2	709.952	104.4	612.704	104.3	162.289
104.3	152.617	104.3	44.8641	104.4	20.2305	104.3	709.977	104.5	612.723	104.4	162.32
104.4	152.738	104.4	44.9297	104.5	20.3024	104.4	710.03	104.6	612.734	104.5	162.337
104.5	152.855	104.5	44.9656	104.6	20.3398	104.5	710.062	104.7	612.755	104.6	162.347
104.6	152.993	104.6	45.0344	104.7	20.3805	104.6	710.098	104.8	612.774	104.7	162.367
104.7	153.124	104.7	45.0586	104.8	20.4531	104.7	710.139	104.9	612.796	104.8	162.386
104.8	153.251	104.8	45.1016	104.9	20.5133	104.8	710.168	105	612.801	104.9	162.384
104.9	153.362	104.9	45.1453	105	20.582	104.9	710.202	105.1	612.828	105	162.41
105	153.481	105	45.1914	105.1	20.6602	105	710.234	105.2	612.852	105.1	162.43
105.1	153.617	105.1	45.25	105.2	20.7203	105.1	710.253	105.3	612.871	105.2	162.437
105.2	153.746	105.2	45.3039	105.3	20.8008	105.2	710.299	105.4	612.886	105.3	162.446
105.3	153.891	105.3	45.3477	105.4	20.8805	105.3	710.348	105.5	612.915	105.4	162.449
105.4	154.02	105.4	45.4031	105.5	20.9414	105.4	710.382	105.6	612.933	105.5	162.456
105.5	154.129	105.5	45.4609	105.6	20.9899	105.5	710.413	105.7	612.954	105.6	162.469
105.6	154.266	105.6	45.5031	105.7	21.0703	105.6	710.452	105.8	612.985	105.7	162.5
105.7	154.41	105.7	45.5586	105.8	21.1602	105.7	710.488	105.9	613.003	105.8	162.508
105.8	154.566	105.8	45.6024	105.9	21.2086	105.8	710.53	106	613.024	105.9	162.52
105.9	154.692	105.9	45.6602	106	21.2742	105.9	710.573	106.1	613.034	106	162.536
106	154.828	106	45.7109	106.1	21.3289	106	710.598	106.2	613.055	106.1	162.539
106.1	154.952	106.1	45.7531	106.2	21.3711	106.1	710.624	106.3	613.073	106.2	162.559
106.2	155.071	106.2	45.8133	106.3	21.4313	106.2	710.655	106.4	613.102	106.3	162.577
106.3	155.188	106.3	45.8711	106.4	21.4805	106.3	710.698	106.5	613.126	106.4	162.59
106.4	155.328	106.4	45.9102	106.5	21.5406	106.4	710.741	106.6	613.144	106.5	162.606
106.5	155.462	106.5	45.9539	106.6	21.6016	106.5	710.777	106.7	613.177	106.6	162.621
106.6	155.598	106.6	46.0031	106.7	21.6688	106.6	710.823	106.8	613.206	106.7	162.641
106.7	155.753	106.7	46.0508	106.8	21.7109	106.7	710.858	106.9	613.223	106.8	162.655
106.8	155.875	106.8	46.0898	106.9	21.7547	106.8	710.898	107	613.242	106.9	162.66
106.9	155.993	106.9	46.1336	107	21.825	106.9	710.933	107.1	613.265	107	162.675
107	156.122	107	46.1602	107.1	21.8727	107	710.98	107.2	613.277	107.1	162.688
107.1	156.273	107.1	46.2062	107.2	21.9336	107.1	711.018	107.3	613.294	107.2	162.704
107.2	156.411	107.2	46.2383	107.3	22.0016	107.2	711.054	107.4	613.323	107.3	162.719
107.3	156.578	107.3	46.2773	107.4	22.0625	107.3	711.078	107.5	613.352	107.4	162.738
107.4	156.746	107.4	46.325	107.5	22.1211	107.4	711.127	107.6	613.371	107.5	162.75
107.5	156.887	107.5	46.3742	107.6	22.1696	107.5	711.163	107.7	613.395	107.6	162.765
107.6	157.027	107.6	46.4149	107.7	22.2305	107.6	711.188	107.8	613.425	107.7	162.777
107.7	157.161	107.7	46.4523	107.8	22.2906	107.7	711.226	107.9	613.446	107.8	162.794
107.8	157.312	107.8	46.493	107.9	22.3398	107.8	711.248	108	613.476	107.9	162.801
107.9	157.442	107.9	46.5438	108	22.3953	107.9	711.273	108.1	613.505	108	162.82
108	157.586	108	46.5851	108.1	22.4539	108	711.297	108.2	613.534	108.1	162.835
108.1	157.727	108.1	46.6336	108.2	22.5211	108.1	711.323	108.3	613.563	108.2	162.848
108.2	157.836	108.2	46.6719	108.3	22.582	108.2	711.346	108.4	613.605	108.3	162.848
108.3	157.969	108.3	46.7109	108.4	22.6211	108.3	711.382	108.5	613.617	108.4	162.864
108.4	158.066	108.4	46.7695	108.5	22.6922	108.4	711.413	108.6	613.634	108.5	162.871
108.5	158.173	108.5	46.8008	108.6	22.7399	108.5	711.433	108.7	613.665	108.6	162.891
108.6	158.273	108.6	46.843	108.7	22.8125	108.6	711.457	108.8	613.695	108.7	162.898
108.7	158.391	108.7	46.8914	108.8	22.861	108.7	711.5	108.9	613.716	108.8	162.918
108.8	158.523	108.8	46.9539	108.9	22.9149	108.8	711.53	109	613.742	108.9	162.93
108.9	158.622	108.9	47.0031	109	22.9727	108.9	711.566	109.1	613.765	109	162.93
109	158.734	109	47.0391	109.1	23.0125	109	711.608	109.2	613.782	109.1	162.949
109.1	158.872	109.1	47.0945	109.2	23.0719	109.1	711.632	109.3	613.801	109.2	162.969
109.2	158.984	109.2	47.1359	109.3	23.1016	109.2	711.652	109.4	613.835	109.3	162.976
109.3	159.122	109.3	47.1844	109.4	23.1649	109.3	711.671	109.5	613.864	109.4	162.988
109.4	159.258	109.4	47.2227	109.5	23.2125	109.4	711.707	109.6	613.891	109.5	163.005
109.5	159.391	109.5	47.2648	109.6	23.2617	109.5	711.737	109.7	613.907	109.6	163.012
109.6	159.523	109.6	47.3359	109.7	23.325	109.6	711.789	109.8	613.925	109.7	163.031
109.7	159.653	109.7	47.3914	109.8	23.3836	109.7	711.823	109.9	613.949	109.8	163.046
109.8	159.784	109.8	47.4539	109.9	23.4492	109.8	711.838	110	613.966	109.9	163.059
109.9	159.891	109.9	47.4953	110	23.5094	109.9	711.887	110.1	613.995	110	163.078
110	160.042	110	47.5469	110.1	23.575	110	711.93	110.2	614.008	110.1	163.087
110.1	160.161	110.1	47.5977	110.2	23.6523	110.1	711.956	110.3	614.024	110.2	163.102
110.2	160.266	110.2	47.6484	110.3	23.7156	110.2	711.998	110.4	614.034	110.3	163.121
110.3	160.384	110.3	47.7117	110.4	23.7625	110.3	712.042	110.5	614.055	110.4	163.129
110.4	160.491	110.4	47.7648	110.5	23.8414	110.4	712.078	110.6	614.07	110.5	163.144
110.5	160.614	110.5	47.8133	110.6	23.9266	110.5	712.116	110.7	614.085	110.6	163.148
110.6	160.734	110.6	47.8641	110.7	23.9727	110.6	712.147	110.8	614.114	110.7	163.18
110.7	160.872	110.7	47.9055	110.8	24.0328	110.7	712.199	110.9	614.126	110.8	163.184
110.8	161.011	110.8	47.9539	110.9	24.0867	110.8	712.234	111	614.155	110.9	163.199
110.9	161.141	110.9	48.0031	111	24.1523	110.9	712.276	111.1	614.18	111	163.206
111	161.285	111	48.0555	111.1	24.2008	111	712.316	111.2	614.196	111.1	163.214
111.1	161.426	111.1	48.1047	111.2	24.2664	111.1	712.362	111.3	614.214	111.2	163.223
111.2	161.583	111.2	48.1531	111.3	24.332	111.2	712.394	111.4	614.23	111.3	163.23
111.3	161.714	111.3	48.2156	111.4	24.3758	111.3	712.43	111.5	614.243	111.4	163.245
111.4	161.872	111.4	48.2766	111.5	24.4492	111.4	712.467	111.6	614.262	111.5	163.246
111.5	162.003	111.5	48.3281	111.6	24.4899	111.5	712.508	111.7	614.284	111.6	163.266
111.6	162.146	111.6	48.3836	111.7	24.5477	111.6	712.534	111.8	614.305	111.7	163.265
111.7	162.292	111.7	48.4445	111.8	24.6094	111.7	712.577	111.9	614.32	111.8	163.277
111.8	162.403	111.8	48.493	111.9	24.6531	111.8	712.629	112	614.332	111.9	163.294
111.9	162.534	111.9	48.5617	112	24.7321	111.9	712.655	112.1	614.343	112	163.296
112	162.653	112	48.6266	112.1	24.7859	112	712.698	112.2	614.372	112.1	163.32
112.1	162.784	112.1	48.6867	112.2	24.8516	112.1	712.722	112.3	614.403	112.2	163.328
112.2	162.891	112.2	48.7547	112.3	24.9227	112.2	712.753	112.4	614.422	112.3	163.345
112.3	163.008	112.3	48.8234	112.4	24.9703	112.3	712.797	112.5	614.445	112.4	163.355
112.4	163.134	112.4	48.8836	112.5	25.0477	112.4	712.838	112.6	614.461	112.5	163.379
112.5	163.241	112.5	48.9375	112.6	25.1211	112.5	712.87	112.7	614.473	112.6	163.386
112.6	163.364	112.6	48.9953	112.7	25.1844	112.6	712.906	112.8	614.492	112.7	163.395
112.7	163.464	112.7	49.0516	112.8	25.2188	112.7	712.964	112.9	614.503	112.8	163.418
112.8	163.563	112.8	49.0945	112.9	25.2711	112.8	713.003	113	614.524	112.9	163.445
112.9	163.652	112.9	49.1437	113	25.3516	112.9	713.027	113.1	614.542	113	163.454
113	163.763	113	49.2039	113.1	25.4	113	713.057	113.2	614.555	113.1	163.469
113.1	163.862	113.1	49.2773	113.2	25.4461	113.1	713.098	113.3	614.554	113.2	163.476
113.2	163.97	113.2	49.332	113.3	25.5	113.2	713.144	113.4	614.583	113.3	163.5
113.3	164.071	113.3	49.3937	113.4	25.5328	113.3	713.178	113.5	614.602	113.4	163.505
113.4	164.183	113.4	49.4344	113.5	25.6063	113.4	713.219	113.6	614.626	113.5	163.515
113.5	164.313	113.5	49.4852	113.6	25.6836	113.5	713.253	113.7	614.644	113.6	163.52
113.6	164.433	113.6	49.5344	113.7	25.7547	113.6	713.299	113.8	614.677	113.7	163.524
113.7	164.555	113.7	49.5945	113.8	25.8102	113.7	713.343	113.9	614.691	113.8	163.527
113.8	164.692	113.8	49.6359	113.9	25.8758	113.8	713.387	114	614.711	113.9	163.539
113.9	164.813	113.9	49.6844	114	25.9414	113.9	713.433	114.1	614.726	114	163.554
114	164.969	114	49.7383	114.1	25.9852	114	713.467	114.2	614.75	114.1	163.566
114.1	165.093	114.1	49.8039	114.2	26.0508	114.1	713.523	114.3	614.763	114.2	163.575
114.2	165.231	114.2	49.8524	114.3	26.111	114.2	713.562	114.4	614.793	114.3	163.585
114.3	165.374	114.3	49.9031	114.4	26.1914	114.3	713.605	114.5	614.804	114.4	163.609
114.4	165.532	114.4	49.9445	114.5	26.2625	114.4	713.644	114.6	614.833	114.5	163.614
114.5	165.652	114.5	49.9805	114.6	26.3297	114.5	713.688	114.7	614.852	114.6	163.624
114.6	165.77	114.6	50.0242	114.7	26.3828	114.6	713.729	114.8	614.879	114.7	163.634
114.7	165.891	114.7	50.0508	114.8	26.4313	114.7	713.773	114.9	614.898	114.8	163.648
114.8	166.023	114.8	50.0734	114.9	26.4805	114.8	713.804	115	614.915	114.9	163.66
114.9	166.153	114.9	50.1219	115	26.5633	114.9	713.828	115.1	614.937	115	163.675
115	166.292	115	50.175	115.1	26.6227	115	713.874	115.2	614.966	115.1	163.684
115.1	166.423	115.1	50.2039	115.2	26.6914	115.1	713.913	115.3	614.984	115.2	163.695
115.2	166.573	115.2	50.2648	115.3	26.7422	115.2	713.945	115.4	615	115.3	163.696
115.3	166.692	115.3	50.3016	115.4	26.8024	115.3	713.976	115.5	615.008	115.4	163.711
115.4	166.809	115.4	50.3398	115.5	26.8516	115.4	714.015	115.6	615.036	115.5	163.726
115.5	166.933	115.5	50.3789	115.6	26.9149	115.5	714.057	115.7	615.051	115.6	163.735
115.6	167.032	115.6	50.4149	115.7	26.9656	115.6	714.093	115.8	615.066	115.7	163.737
115.7	167.141	115.7	50.4641	115.8	27.0164	115.7	714.132	115.9	615.083	115.8	163.75
115.8	167.284	115.8	50.5125	115.9	27.0719	115.8	714.168	116	615.102	115.9	163.755
115.9	167.403	115.9	50.5656	116	27.1328	115.9	714.195	116.1	615.109	116	163.777
116	167.511	116	50.6024	116.1	27.1844	116	714.214	116.2	615.129	116.1	163.773
116.1	167.629	116.1	50.6531	116.2	27.2617	116.1	714.237	116.3	615.141	116.2	163.789
116.2	167.723	116.2	50.7062	116.3	27.3102	116.2	714.273	116.4	615.153	116.3	163.794
116.3	167.843	116.3	50.7578	116.4	27.3758	116.3	714.297	116.5	615.175	116.4	163.809
116.4	167.973	116.4	50.7938	116.5	27.4297	116.4	714.323	116.6	615.196	116.5	163.82
116.5	168.078	116.5	50.843	116.6	27.4703	116.5	714.359	116.7	615.211	116.6	163.823
116.6	168.204	116.6	50.9149	116.7	27.5242	116.6	714.386	116.8	615.211	116.7	163.837
116.7	168.343	116.7	50.9727	116.8	27.582	116.7	714.417	116.9	615.226	116.8	163.84
116.8	168.481	116.8	51.0031	116.9	27.6336	116.8	714.448	117	615.243	116.9	163.855
116.9	168.598	116.9	51.0516	117	27.7156	116.9	714.484	117.1	615.265	117	163.867
117	168.722	117	51.1125	117.1	27.7594	117	714.503	117.2	615.294	117.1	163.876
117.1	168.852	117.1	51.1531	117.2	27.8125	117.1	714.534	117.3	615.301	117.2	163.886
117.2	169.005	117.2	51.2156	117.3	27.861	117.2	714.554	117.4	615.325	117.3	163.898
117.3	169.129	117.3	51.2766	117.4	27.9023	117.3	714.593	117.5	615.347	117.4	163.927
117.4	169.241	117.4	51.325	117.5	27.9609	117.4	714.612	117.6	615.371	117.5	163.925
117.5	169.372	117.5	51.3742	117.6	28.0242	117.5	714.637	117.7	615.384	117.6	163.938
117.6	169.491	117.6	51.4227	117.7	28.0992	117.6	714.678	117.8	615.391	117.7	163.956
117.7	169.61	117.7	51.4805	117.8	28.1406	117.7	714.702	117.9	615.405	117.8	163.957
117.8	169.738	117.8	51.5422	117.9	28.2008	117.8	714.734	118	615.418	117.9	163.973
117.9	169.867	117.9	51.5781	118	28.2547	117.9	714.765	118.1	615.43	118	163.98
118	169.984	118	51.6219	118.1	28.3125	118	714.792	118.2	615.446	118.1	164
118.1	170.134	118.1	51.6531	118.2	28.3758	118.1	714.816	118.3	615.464	118.2	164.031
118.2	170.234	118.2	51.7141	118.3	28.443	118.2	714.843	118.4	615.485	118.3	164.043
118.3	170.352	118.3	51.75	118.4	28.5117	118.3	714.874	118.5	615.492	118.4	164.039
118.4	170.488	118.4	51.7938	118.5	28.5945	118.4	714.905	118.6	615.503	118.5	164.059
118.5	170.609	118.5	51.8398	118.6	28.6649	118.5	714.945	118.7	615.513	118.6	164.085
118.6	170.707	118.6	51.8906	118.7	28.7352	118.6	714.979	118.8	615.536	118.7	164.09
118.7	170.845	118.7	51.9328	118.8	28.7906	118.7	715.003	118.9	615.554	118.8	164.109
118.8	170.964	118.8	51.9813	118.9	28.8828	118.8	715.023	119	615.57	118.9	164.126
118.9	171.098	118.9	52.0438	119	28.9461	118.9	715.047	119.1	615.583	119	164.141
119	171.227	119	52.0969	119.1	29.0117	119	715.073	119.2	615.605	119.1	164.155
119.1	171.352	119.1	52.1367	119.2	29.0602	119.1	715.105	119.3	615.626	119.2	164.16
119.2	171.484	119.2	52.2039	119.3	29.1258	119.2	715.139	119.4	615.644	119.3	164.18
119.3	171.61	119.3	52.2648	119.4	29.1719	119.3	715.171	119.5	615.66	119.4	164.195
119.4	171.734	119.4	52.3133	119.5	29.2321	119.4	715.191	119.6	615.673	119.5	164.196
119.5	171.852	119.5	52.3516	119.6	29.2813	119.5	715.214	119.7	615.683	119.6	164.211
119.6	171.962	119.6	52.4102	119.7	29.3445	119.6	715.246	119.8	615.704	119.7	164.219
119.7	172.112	119.7	52.4609	119.8	29.4149	119.7	715.284	119.9	615.719	119.8	164.234
119.8	172.243	119.8	52.5078	119.9	29.4703	119.8	715.304	120	615.735	119.9	164.238
119.9	172.359	119.9	52.5586	120	29.4969	119.9	715.323	120.1	615.765	120	164.258
120	172.477	120	52.6141	120.1	29.5625	120	715.359	120.2	615.786	120.1	164.274
120.1	172.598	120.1	52.675	120.2	29.6094	120.1	715.381	120.3	615.813	120.2	164.289
120.2	172.702	120.2	52.7234	120.3	29.6414	120.2	715.41	120.4	615.823	120.3	164.304
120.3	172.813	120.3	52.7813	120.4	29.6891	120.3	715.448	120.5	615.84	120.4	164.316
120.4	172.926	120.4	52.8234	120.5	29.7422	120.4	715.488	120.6	615.864	120.5	164.34
120.5	173.078	120.5	52.8836	120.6	29.8133	120.5	715.515	120.7	615.886	120.6	164.345
120.6	173.192	120.6	52.9219	120.7	29.8836	120.6	715.549	120.8	615.903	120.7	164.359
120.7	173.312	120.7	52.9688	120.8	29.9539	120.7	715.581	120.9	615.93	120.8	164.371
120.8	173.438	120.8	53.0195	120.9	29.9899	120.8	715.612	121	615.946	120.9	164.386
120.9	173.547	120.9	53.0633	121	30.075	120.9	715.637	121.1	615.976	121	164.398
121	173.661	121	53.1016	121.1	30.1453	121	715.675	121.2	616.005	121.1	164.427
121.1	173.785	121.1	53.1437	121.2	30.2031	121.1	715.709	121.3	616.027	121.2	164.445
121.2	173.898	121.2	53.2039	121.3	30.2625	121.2	715.746	121.4	616.039	121.3	164.461
121.3	174.005	121.3	53.2422	121.4	30.3172	121.3	715.784	121.5	616.055	121.4	164.476
121.4	174.124	121.4	53.2961	121.5	30.3953	121.4	715.816	121.6	616.073	121.5	164.485
121.5	174.243	121.5	53.3398	121.6	30.4656	121.5	715.846	121.7	616.095	121.6	164.508
121.6	174.343	121.6	53.3719	121.7	30.5133	121.6	715.894	121.8	616.124	121.7	164.527
121.7	174.449	121.7	53.425	121.8	30.5359	121.7	715.926	121.9	616.153	121.8	164.536
121.8	174.563	121.8	53.4539	121.9	30.5508	121.8	715.964	122	616.177	121.9	164.559
121.9	174.688	121.9	53.4883	122	30.6063	121.9	715.988	122.1	616.206	122	164.585
122	174.828	122	53.5242	122.1	30.6523	122	716.03	122.2	616.219	122.1	164.598
122.1	174.945	122.1	53.5539	122.2	30.6922	122.1	716.062	122.3	616.235	122.2	164.606
122.2	175.083	122.2	53.5781	122.3	30.743	122.2	716.105	122.4	616.253	122.3	164.621
122.3	175.222	122.3	53.6211	122.4	30.8102	122.3	716.137	122.5	616.286	122.4	164.641
122.4	175.372	122.4	53.6453	122.5	30.8828	122.4	716.187	122.6	616.304	122.5	164.667
122.5	175.503	122.5	53.6828	122.6	30.9422	122.5	716.214	122.7	616.333	122.6	164.68
122.6	175.641	122.6	53.7305	122.7	31.0016	122.6	716.248	122.8	616.352	122.7	164.696
122.7	175.77	122.7	53.7625	122.8	31.0477	122.7	716.289	122.9	616.374	122.8	164.702
122.8	175.906	122.8	53.8156	122.9	31.1328	122.8	716.316	123	616.391	122.9	164.719
122.9	176.039	122.9	53.8524	123	31.2039	122.9	716.358	123.1	616.41	123	164.735
123	176.168	123	53.8906	123.1	31.2742	123	716.402	123.2	616.427	123.1	164.745
123.1	176.302	123.1	53.9133	123.2	31.3414	123.1	716.421	123.3	616.445	123.2	164.755
123.2	176.425	123.2	53.9539	123.3	31.3953	123.2	716.457	123.4	616.466	123.3	164.777
123.3	176.532	123.3	54.0047	123.4	31.4609	123.3	716.495	123.5	616.48	123.4	164.786
123.4	176.629	123.4	54.0656	123.5	31.5047	123.4	716.527	123.6	616.495	123.5	164.808
123.5	176.746	123.5	54.1094	123.6	31.5633	123.5	716.566	123.7	616.508	123.6	164.82
123.6	176.859	123.6	54.1649	123.7	31.5914	123.6	716.6	123.8	616.524	123.7	164.823
123.7	176.972	123.7	54.2141	123.8	31.6406	123.7	716.637	123.9	616.542	123.8	164.833
123.8	177.102	123.8	54.2578	123.9	31.7039	123.8	716.678	124	616.547	123.9	164.843
123.9	177.23	123.9	54.3086	124	31.75	123.9	716.714	124.1	616.563	124	164.845
124	177.352	124	54.3641	124.1	31.7789	124	716.734	124.2	616.57	124.1	164.859
124.1	177.464	124.1	54.418	124.2	31.832	124.1	716.77	124.3	616.582	124.2	164.863
124.2	177.583	124.2	54.4609	124.3	31.8805	124.2	716.804	124.4	616.57	124.3	164.855
124.3	177.734	124.3	54.5117	124.4	31.9266	124.3	716.835	124.5	616.575	124.4	164.845
124.4	177.841	124.4	54.5313	124.5	31.9774	124.4	716.87	124.6	616.582	124.5	164.847
124.5	177.977	124.5	54.5781	124.6	32.043	124.5	716.906	124.7	616.597	124.6	164.84
124.6	178.093	124.6	54.6406	124.7	32.0945	124.6	716.945	124.8	616.614	124.7	164.84
124.7	178.216	124.7	54.6961	124.8	32.1617	124.7	716.967	124.9	616.602	124.8	164.828
124.8	178.355	124.8	54.7453	124.9	32.2352	124.8	716.977	125	616.616	124.9	164.835
124.9	178.438	124.9	54.7891	125	32.2813	124.9	717.003	125.1	616.621	125	164.825
125	178.547	125	54.825	125.1	32.3367	125	717.02	125.2	616.614	125.1	164.827
125.1	178.648	125.1	54.8594	125.2	32.4031	125.1	717.049	125.3	616.609	125.2	164.828
125.2	178.731	125.2	54.9055	125.3	32.4609	125.2	717.073	125.4	616.602	125.3	164.825
125.3	178.848	125.3	54.9539	125.4	32.5047	125.3	717.093	125.5	616.582	125.4	164.832
125.4	178.957	125.4	54.9883	125.5	32.5485	125.4	717.085	125.6	616.585	125.5	164.835
125.5	179.093	125.5	55.0438	125.6	32.6141	125.5	717.093	125.7	616.57	125.6	164.837
125.6	179.212	125.6	55.0969	125.7	32.6649	125.6	717.105	125.8	616.559	125.7	164.827
125.7	179.316	125.7	55.1484	125.8	32.6961	125.7	717.109	125.9	616.544	125.8	164.823
125.8	179.442	125.8	55.1875	125.9	32.7274	125.8	717.116	126	616.531	125.9	164.825
125.9	179.554	125.9	55.2234	126	32.75	125.9	717.124	126.1	616.515	126	164.816
126	179.661	126	55.2648	126.1	32.7906	126	717.12	126.2	616.508	126.1	164.813
126.1	179.766	126.1	55.3133	126.2	32.825	126.1	717.132	126.3	616.505	126.2	164.82
126.2	179.898	126.2	55.3516	126.3	32.8758	126.2	717.129	126.4	616.492	126.3	164.827
126.3	180.047	126.3	55.382	126.4	32.9266	126.3	717.127	126.5	616.461	126.4	164.828
126.4	180.176	126.4	55.4344	126.5	32.9852	126.4	717.132	126.6	616.446	126.5	164.837
126.5	180.294	126.5	55.4852	126.6	33.0359	126.5	717.137	126.7	616.434	126.6	164.835
126.6	180.398	126.6	55.5148	126.7	33.1016	126.6	717.136	126.8	616.413	126.7	164.835
126.7	180.523	126.7	55.5555	126.8	33.1696	126.7	717.124	126.9	616.391	126.8	164.825
126.8	180.658	126.8	55.5851	126.9	33.2547	126.8	717.127	127	616.371	126.9	164.828
126.9	180.792	126.9	55.6336	127	33.3367	126.9	717.112	127.1	616.34	127	164.84
127	180.914	127	55.6828	127.1	33.4149	127	717.086	127.2	616.309	127.1	164.84
127.1	181.044	127.1	55.7352	127.2	33.4852	127.1	717.078	127.3	616.294	127.2	164.84
127.2	181.195	127.2	55.7695	127.3	33.5625	127.2	717.066	127.4	616.284	127.3	164.848
127.3	181.331	127.3	55.8133	127.4	33.6453	127.3	717.049	127.5	616.27	127.4	164.843
127.4	181.447	127.4	55.8633	127.5	33.7156	127.4	717.034	127.6	616.243	127.5	164.848
127.5	181.586	127.5	55.8859	127.6	33.7625	127.5	717.015	127.7	616.223	127.6	164.856
127.6	181.714	127.6	55.9149	127.7	33.8297	127.6	716.996	127.8	616.202	127.7	164.859
127.7	181.86	127.7	55.9641	127.8	33.8789	127.7	716.964	127.9	616.188	127.8	164.874
127.8	182.008	127.8	56.0125	127.9	33.943	127.8	716.956	128	616.165	127.9	164.879
127.9	182.141	127.9	56.0656	128	33.9774	127.9	716.925	128.1	616.121	128	164.887
128	182.27	128	56.1141	128.1	34.0117	128	716.909	128.2	616.105	128.1	164.907
128.1	182.394	128.1	56.1602	128.2	34.0438	128.1	716.898	128.3	616.07	128.2	164.905
128.2	182.555	128.2	56.2039	128.3	34.075	128.2	716.877	128.4	616.032	128.3	164.918
128.3	182.68	128.3	56.2531	128.4	34.1063	128.3	716.848	128.5	616.016	128.4	164.93
128.4	182.828	128.4	56.2938	128.5	34.1453	128.4	716.835	128.6	616.003	128.5	164.949
128.5	182.942	128.5	56.3351	128.6	34.2039	128.5	716.804	128.7	615.98	128.6	164.957
128.6	183.054	128.6	56.4031	128.7	34.2664	128.6	716.77	128.8	615.949	128.7	164.98
128.7	183.173	128.7	56.4641	128.8	34.325	128.7	716.748	128.9	615.918	128.8	165
128.8	183.297	128.8	56.532	128.9	34.3953	128.8	716.722	129	615.915	128.9	165.005
128.9	183.402	128.9	56.5851	129	34.4539	128.9	716.71	129.1	615.871	129	165.012
129	183.52	129	56.6336	129.1	34.5164	129	716.695	129.2	615.828	129.1	165.02
129.1	183.644	129.1	56.6797	129.2	34.575	129.1	716.668	129.3	615.801	129.2	165.027
129.2	183.751	129.2	56.7383	129.3	34.6336	129.2	716.644	129.4	615.755	129.3	165.023
129.3	183.852	129.3	56.7891	129.4	34.7156	129.3	716.624	129.5	615.695	129.4	165.027
129.4	183.952	129.4	56.8359	129.5	34.7906	129.4	716.612	129.6	615.672	129.5	165.047
129.5	184.044	129.5	56.8953	129.6	34.8563	129.5	716.593	129.7	615.614	129.6	165.059
129.6	184.163	129.6	56.9297	129.7	34.907	129.6	716.559	129.8	615.585	129.7	165.063
129.7	184.282	129.7	56.9727	129.8	34.9531	129.7	716.53	129.9	615.539	129.8	165.078
129.8	184.413	129.8	57.0031	129.9	35.0094	129.8	716.503	130	615.493	129.9	165.09
129.9	184.513	129.9	57.0469	130	35.075	129.9	716.491	130.1	615.433	130	165.102
130	184.614	130	57.0828	130.1	35.1211	130	716.472	130.2	615.384	130.1	165.116
130.1	184.734	130.1	57.1406	130.2	35.1696	130.1	716.457	130.3	615.343	130.2	165.114
130.2	184.864	130.2	57.1828	130.3	35.2422	130.2	716.409	130.4	615.294	130.3	165.129
130.3	184.972	130.3	57.2313	130.4	35.2859	130.3	716.379	130.5	615.255	130.4	165.141
130.4	185.091	130.4	57.2617	130.5	35.325	130.4	716.366	130.6	615.211	130.5	165.155
130.5	185.219	130.5	57.3055	130.6	35.3641	130.5	716.352	130.7	615.163	130.6	165.148
130.6	185.323	130.6	57.332	130.7	35.407	130.6	716.338	130.8	615.114	130.7	165.165
130.7	185.442	130.7	57.3547	130.8	35.4539	130.7	716.32	130.9	615.073	130.8	165.175
130.8	185.554	130.8	57.4031	130.9	35.4852	130.8	716.309	131	615.044	130.9	165.18
130.9	185.653	130.9	57.4492	131	35.5508	130.9	716.28	131.1	615.003	131	165.191
131	185.763	131	57.5031	131.1	35.5633	131	716.265	131.2	614.954	131.1	165.183
131.1	185.894	131.1	57.532	131.2	35.6188	131.1	716.23	131.3	614.918	131.2	165.188
131.2	186.004	131.2	57.582	131.3	35.6766	131.2	716.198	131.4	614.879	131.3	165.196
131.3	186.109	131.3	57.6258	131.4	35.7274	131.3	716.18	131.5	614.845	131.4	165.195
131.4	186.231	131.4	57.6633	131.5	35.7859	131.4	716.139	131.6	614.823	131.5	165.188
131.5	186.367	131.5	57.6992	131.6	35.8563	131.5	716.109	131.7	614.794	131.6	165.204
131.6	186.488	131.6	57.7352	131.7	35.9149	131.6	716.088	131.8	614.745	131.7	165.206
131.7	186.609	131.7	57.7961	131.8	35.9774	131.7	716.066	131.9	614.704	131.8	165.204
131.8	186.715	131.8	57.8398	131.9	36.0195	131.8	716.037	132	614.68	131.9	165.211
131.9	186.841	131.9	57.8836	132	36.0828	131.9	716.013	132.1	614.653	132	165.218
132	186.952	132	57.925	132.1	36.1305	132	715.998	132.2	614.636	132.1	165.214
132.1	187.066	132.1	57.9617	132.2	36.2078	132.1	715.964	132.3	614.605	132.2	165.216
132.2	187.192	132.2	58.0117	132.3	36.2547	132.2	715.921	132.4	614.583	132.3	165.214
132.3	187.302	132.3	58.0469	132.4	36.3367	132.3	715.882	132.5	614.559	132.4	165.216
132.4	187.402	132.4	58.1063	132.5	36.4023	132.4	715.848	132.6	614.516	132.5	165.206
132.5	187.493	132.5	58.1437	132.6	36.4539	132.5	715.823	132.7	614.456	132.6	165.207
132.6	187.598	132.6	58.1844	132.7	36.5125	132.6	715.804	132.8	614.398	132.7	165.219
132.7	187.719	132.7	58.2453	132.8	36.5797	132.7	715.768	132.9	614.352	132.8	165.219
132.8	187.816	132.8	58.2938	132.9	36.6258	132.8	715.727	133	614.304	132.9	165.219
132.9	187.933	132.9	58.343	133	36.7078	132.9	715.699	133.1	614.255	133	165.216
133	188.037	133	58.4031	133.1	36.7547	133	715.659	133.2	614.202	133.1	165.218
133.1	188.163	133.1	58.4523	133.2	36.8125	133.1	715.617	133.3	614.158	133.2	165.214
133.2	188.285	133.2	58.493	133.3	36.8641	133.2	715.588	133.4	614.085	133.3	165.223
133.3	188.403	133.3	58.5313	133.4	36.9344	133.3	715.559	133.5	614.039	133.4	165.223
133.4	188.53	133.4	58.5781	133.5	36.9656	133.4	715.518	133.6	613.966	133.5	165.211
133.5	188.664	133.5	58.6289	133.6	37.0047	133.5	715.496	133.7	613.894	133.6	165.226
133.6	188.802	133.6	58.6649	133.7	37.0524	133.6	715.452	133.8	613.833	133.7	165.227
133.7	188.918	133.7	58.6945	133.8	37.082	133.7	715.421	133.9	613.758	133.8	165.219
133.8	189.032	133.8	58.7234	133.9	37.1258	133.8	715.394	134	613.723	133.9	165.219
133.9	189.195	133.9	58.7648	134	37.1766	133.9	715.359	134.1	613.68	134	165.227
134	189.341	134	58.7891	134.1	37.2352	134	715.338	134.2	613.624	134.1	165.226
134.1	189.477	134.1	58.825	134.2	37.2859	134.1	715.323	134.3	613.563	134.2	165.238
134.2	189.637	134.2	58.8641	134.3	37.3445	134.2	715.289	134.4	613.5	134.3	165.242
134.3	189.763	134.3	58.8906	134.4	37.4102	134.3	715.273	134.5	613.452	134.4	165.238
134.4	189.891	134.4	58.9375	134.5	37.4734	134.4	715.245	134.6	613.388	134.5	165.245
134.5	190.015	134.5	58.9805	134.6	37.5289	134.5	715.217	134.7	613.355	134.6	165.25
134.6	190.141	134.6	59.0078	134.7	37.5867	134.6	715.195	134.8	613.32	134.7	165.258
134.7	190.284	134.7	59.0508	134.8	37.657	134.7	715.18	134.9	613.309	134.8	165.277
134.8	190.411	134.8	59.0898	134.9	37.7352	134.8	715.159	135	613.286	134.9	165.277
134.9	190.566	134.9	59.1336	135	37.8055	134.9	715.148	135.1	613.265	135	165.282
135	190.673	135	59.1633	135.1	37.8516	135	715.127	135.2	613.235	135.1	165.296
135.1	190.773	135.1	59.207	135.2	37.8836	135.1	715.105	135.3	613.199	135.2	165.309
135.2	190.887	135.2	59.243	135.3	37.9422	135.2	715.078	135.4	613.165	135.3	165.305
135.3	190.984	135.3	59.2844	135.4	37.993	135.3	715.057	135.5	613.155	135.4	165.309
135.4	191.091	135.4	59.3133	135.5	38.0406	135.4	715.027	135.6	613.114	135.5	165.32
135.5	191.18	135.5	59.3547	135.6	38.0781	135.5	715.006	135.7	613.098	135.6	165.34
135.6	191.266	135.6	59.3914	135.7	38.1227	135.6	714.988	135.8	613.093	135.7	165.352
135.7	191.37	135.7	59.4297	135.8	38.1766	135.7	714.957	135.9	613.052	135.8	165.366
135.8	191.462	135.8	59.4688	135.9	38.2352	135.8	714.948	136	613.027	135.9	165.367
135.9	191.563	135.9	59.5047	136	38.2859	135.9	714.913	136.1	612.996	136	165.379
136	191.675	136	59.5539	136.1	38.3172	136	714.898	136.2	612.949	136.1	165.398
136.1	191.782	136.1	59.5945	136.2	38.3758	136.1	714.889	136.3	612.903	136.2	165.398
136.2	191.882	136.2	59.6437	136.3	38.4461	136.2	714.867	136.4	612.855	136.3	165.415
136.3	191.993	136.3	59.6922	136.4	38.4969	136.3	714.838	136.5	612.805	136.4	165.417
136.4	192.112	136.4	59.7578	136.5	38.5477	136.4	714.816	136.6	612.765	136.5	165.418
136.5	192.231	136.5	59.8008	136.6	38.5898	136.5	714.792	136.7	612.704	136.6	165.413
136.6	192.367	136.6	59.8477	136.7	38.6336	136.6	714.773	136.8	612.66	136.7	165.426
136.7	192.477	136.7	59.8984	136.8	38.7039	136.7	714.753	136.9	612.598	136.8	165.434
136.8	192.598	136.8	59.9344	136.9	38.7664	136.8	714.73	137	612.555	136.9	165.441
136.9	192.727	136.9	59.9805	137	38.8133	136.9	714.719	137.1	612.484	137	165.449
137	192.833	137	60.0273	137.1	38.8758	137	714.698	137.2	612.423	137.1	165.449
137.1	192.921	137.1	60.082	137.2	38.9344	137.1	714.688	137.3	612.343	137.2	165.456
137.2	193.035	137.2	60.1289	137.3	38.9852	137.2	714.678	137.4	612.263	137.3	165.457
137.3	193.153	137.3	60.1719	137.4	39.0438	137.3	714.656	137.5	612.207	137.4	165.466
137.4	193.266	137.4	60.2383	137.5	39.1031	137.4	714.648	137.6	612.145	137.5	165.48
137.5	193.359	137.5	60.2891	137.6	39.157	137.5	714.627	137.7	612.102	137.6	165.488
137.6	193.462	137.6	60.325	137.7	39.2156	137.6	714.612	137.8	612.054	137.7	165.5
137.7	193.562	137.7	60.3742	137.8	39.2813	137.7	714.598	137.9	612.013	137.8	165.495
137.8	193.661	137.8	60.4102	137.9	39.3133	137.8	714.588	138	611.988	137.9	165.5
137.9	193.797	137.9	60.4539	138	39.3836	137.9	714.578	138.1	611.941	138	165.508
138	193.894	138	60.4953	138.1	39.4344	138	714.577	138.2	611.93	138.1	165.527
138.1	194.02	138.1	60.5242	138.2	39.4852	138.1	714.566	138.3	611.915	138.2	165.539
138.2	194.145	138.2	60.5586	138.3	39.5359	138.2	714.546	138.4	611.894	138.3	165.536
138.3	194.282	138.3	60.582	138.4	39.6016	138.3	714.526	138.5	611.864	138.4	165.551
138.4	194.413	138.4	60.6172	138.5	39.6414	138.4	714.516	138.6	611.859	138.5	165.551
138.5	194.532	138.5	60.668	138.6	39.7039	138.5	714.508	138.7	611.843	138.6	165.566
138.6	194.671	138.6	60.7156	138.7	39.7547	138.6	714.51	138.8	611.802	138.7	165.559
138.7	194.818	138.7	60.75	138.8	39.8102	138.7	714.488	138.9	611.797	138.8	165.578
138.8	194.964	138.8	60.7844	138.9	39.8445	138.8	714.479	139	611.777	138.9	165.575
138.9	195.102	138.9	60.8398	139	39.9149	138.9	714.469	139.1	611.755	139	165.57
139	195.238	139	60.8758	139.1	39.9461	139	714.456	139.2	611.714	139.1	165.582
139.1	195.362	139.1	60.9133	139.2	40.0164	139.1	714.436	139.3	611.684	139.2	165.585
139.2	195.481	139.2	60.9422	139.3	40.0703	139.2	714.426	139.4	611.644	139.3	165.59
139.3	195.598	139.3	60.9805	139.4	40.1336	139.3	714.413	139.5	611.602	139.4	165.593
139.4	195.712	139.4	61.0078	139.5	40.2039	139.4	714.41	139.6	611.578	139.5	165.595
139.5	195.855	139.5	61.0508	139.6	40.243	139.5	714.389	139.7	611.524	139.6	165.609
139.6	195.973	139.6	61.0898	139.7	40.2906	139.6	714.379	139.8	611.5	139.7	165.605
139.7	196.081	139.7	61.1406	139.8	40.3477	139.7	714.374	139.9	611.484	139.8	165.609
139.8	196.184	139.8	61.1727	139.9	40.4031	139.8	714.358	140	611.473	139.9	165.614
139.9	196.302	139.9	61.2109	140	40.4656	139.9	714.348	140.1	611.457	140	165.621
140	196.413	140	61.2531	140.1	40.5211	140	714.335	140.2	611.446	140.1	165.624
140.1	196.508	140.1	61.2891	140.2	40.575	140.1	714.327	140.3	611.425	140.2	165.629
140.2	196.61	140.2	61.3281	140.3	40.6258	140.2	714.316	140.4	611.376	140.3	165.634
140.3	196.723	140.3	61.3758	140.4	40.6719	140.3	714.307	140.5	611.34	140.4	165.636
140.4	196.843	140.4	61.4133	140.5	40.7039	140.4	714.292	140.6	611.32	140.5	165.626
140.5	196.962	140.5	61.4617	140.6	40.7352	140.5	714.277	140.7	611.286	140.6	165.641
140.6	197.059	140.6	61.5	140.7	40.8055	140.6	714.258	140.8	611.257	140.7	165.648
140.7	197.156	140.7	61.5344	140.8	40.8758	140.7	714.248	140.9	611.219	140.8	165.648
140.8	197.277	140.8	61.5711	140.9	40.9313	140.8	714.227	141	611.184	140.9	165.655
140.9	197.394	140.9	61.6094	141	40.9852	140.9	714.217	141.1	611.163	141	165.653
141	197.481	141	61.6453	141.1	41.0359	141	714.202	141.2	611.122	141.1	165.66
141.1	197.598	141.1	61.6914	141.2	41.0867	141.1	714.176	141.3	611.098	141.2	165.668
141.2	197.719	141.2	61.7141	141.3	41.1328	141.2	714.163	141.4	611.051	141.3	165.675
141.3	197.824	141.3	61.743	141.4	41.1766	141.3	714.152	141.5	611.02	141.4	165.677
141.4	197.957	141.4	61.8039	141.5	41.2234	141.4	714.136	141.6	610.985	141.5	165.68
141.5	198.063	141.5	61.8328	141.6	41.2906	141.5	714.108	141.7	610.945	141.6	165.695
141.6	198.163	141.6	61.8742	141.7	41.3484	141.6	714.098	141.8	610.895	141.7	165.699
141.7	198.251	141.7	61.9031	141.8	41.4188	141.7	714.078	141.9	610.859	141.8	165.716
141.8	198.367	141.8	61.9492	141.9	41.4688	141.8	714.057	142	610.837	141.9	165.723
141.9	198.469	141.9	61.9836	142	41.5406	141.9	714.042	142.1	610.804	142	165.737
142	198.563	142	62.0273	142.1	41.5672	142	714.02	142.2	610.777	142.1	165.75
142.1	198.683	142.1	62.0711	142.2	41.6211	142.1	713.998	142.3	610.755	142.2	165.758
142.2	198.802	142.2	62.1141	142.3	41.6844	142.2	713.977	142.4	610.75	142.3	165.765
142.3	198.913	142.3	62.1602	142.4	41.7516	142.3	713.967	142.5	610.734	142.4	165.774
142.4	199.032	142.4	62.2062	142.5	41.8125	142.4	713.945	142.6	610.712	142.5	165.781
142.5	199.148	142.5	62.243	142.6	41.8758	142.5	713.933	142.7	610.68	142.6	165.801
142.6	199.25	142.6	62.2844	142.7	41.9266	142.6	713.918	142.8	610.656	142.7	165.804
142.7	199.375	142.7	62.3281	142.8	41.9852	142.7	713.905	142.9	610.641	142.8	165.805
142.8	199.516	142.8	62.3641	142.9	42.0195	142.8	713.877	143	610.598	142.9	165.82
142.9	199.648	142.9	62.4133	143	42.075	142.9	713.862	143.1	610.555	143	165.828
143	199.763	143	62.4539	143.1	42.1219	143	713.848	143.2	610.503	143.1	165.847
143.1	199.882	143.1	62.5164	143.2	42.1617	143.1	713.823	143.3	610.454	143.2	165.848
143.2	200.013	143.2	62.5539	143.3	42.2274	143.2	713.807	143.4	610.41	143.3	165.864
143.3	200.129	143.3	62.6063	143.4	42.2664	143.3	713.797	143.5	610.355	143.4	165.871
143.4	200.253	143.4	62.6484	143.5	42.2891	143.4	713.784	143.6	610.294	143.5	165.886
143.5	200.352	143.5	62.6992	143.6	42.3328	143.5	713.768	143.7	610.243	143.6	165.888
143.6	200.477	143.6	62.75	143.7	42.3758	143.6	713.753	143.8	610.187	143.7	165.886
143.7	200.617	143.7	62.8008	143.8	42.4117	143.7	713.746	143.9	610.121	143.8	165.891
143.8	200.712	143.8	62.843	143.9	42.4656	143.8	713.745	144	610.063	143.9	165.894
143.9	200.812	143.9	62.8836	144	42.5242	143.9	713.741	144.1	610.02	144	165.898
144	200.911	144	62.9297	144.1	42.575	144	713.727	144.2	609.98	144.1	165.915
144.1	201.039	144.1	62.9656	144.2	42.6258	144.1	713.729	144.3	609.949	144.2	165.918
144.2	201.168	144.2	63.0148	144.3	42.6523	144.2	713.734	144.4	609.927	144.3	165.941
144.3	201.28	144.3	63.0508	144.4	42.6844	144.3	713.727	144.5	609.894	144.4	165.949
144.4	201.411	144.4	63.0828	144.5	42.7352	144.4	713.734	144.6	609.876	144.5	165.956
144.5	201.547	144.5	63.1242	144.6	42.7742	144.5	713.726	144.7	609.843	144.6	165.966
144.6	201.648	144.6	63.168	144.7	42.825	144.6	713.717	144.8	609.813	144.7	165.98
144.7	201.746	144.7	63.2039	144.8	42.8805	144.7	713.71	144.9	609.781	144.8	165.98
144.8	201.833	144.8	63.25	144.9	42.9266	144.8	713.707	145	609.75	144.9	165.995
144.9	201.949	144.9	63.2726	145	42.9774	144.9	713.707	145.1	609.734	145	166
145	202.054	145	63.3016	145.1	43.0359	145	713.709	145.2	609.699	145.1	166.016
145.1	202.161	145.1	63.3351	145.2	43.075	145.1	713.707	145.3	609.67	145.2	166.027
145.2	202.292	145.2	63.3719	145.3	43.1063	145.2	713.714	145.4	609.663	145.3	166.039
145.3	202.391	145.3	63.3984	145.4	43.1406	145.3	713.717	145.5	609.645	145.4	166.055
145.4	202.5	145.4	63.4344	145.5	43.1649	145.4	713.719	145.6	609.624	145.5	166.058
145.5	202.595	145.5	63.4758	145.6	43.2039	145.5	713.709	145.7	609.575	145.6	166.059
145.6	202.675	145.6	63.493	145.7	43.2547	145.6	713.707	145.8	609.554	145.7	166.07
145.7	202.777	145.7	63.5313	145.8	43.2938	145.7	713.714	145.9	609.524	145.8	166.082
145.8	202.884	145.8	63.5508	145.9	43.3445	145.8	713.719	146	609.503	145.9	166.078
145.9	203.008	145.9	63.5851	146	43.3836	145.9	713.717	146.1	609.473	146	166.097
146	203.129	146	63.6141	146.1	43.4344	146	713.727	146.2	609.454	146.1	166.109
146.1	203.25	146.1	63.6555	146.2	43.4852	146.1	713.729	146.3	609.425	146.2	166.114
146.2	203.367	146.2	63.6922	146.3	43.5438	146.2	713.722	146.4	609.403	146.3	166.129
146.3	203.449	146.3	63.7305	146.4	43.568	146.3	713.722	146.5	609.374	146.4	166.141
146.4	203.555	146.4	63.75	146.5	43.618	146.4	713.719	146.6	609.352	146.5	166.141
146.5	203.668	146.5	63.7742	146.6	43.6766	146.5	713.726	146.7	609.335	146.6	166.16
146.6	203.782	146.6	63.8203	146.7	43.7274	146.6	713.717	146.8	609.302	146.7	166.175
146.7	203.933	146.7	63.8547	146.8	43.7859	146.7	713.727	146.9	609.286	146.8	166.18
146.8	204.047	146.8	63.8984	146.9	43.8563	146.8	713.726	147	609.265	146.9	166.199
146.9	204.173	146.9	63.9375	147	43.8875	146.9	713.717	147.1	609.235	147	166.196
147	204.281	147	63.9734	147.1	43.9383	147	713.727	147.2	609.214	147.1	166.206
147.1	204.382	147.1	64.0148	147.2	43.9969	147.1	713.726	147.3	609.184	147.2	166.211
147.2	204.496	147.2	64.0469	147.3	44.0477	147.2	713.726	147.4	609.163	147.3	166.214
147.3	204.602	147.3	64.0945	147.4	44.0984	147.3	713.73	147.5	609.145	147.4	166.204
147.4	204.722	147.4	64.132	147.5	44.1649	147.4	713.741	147.6	609.112	147.5	166.219
147.5	204.848	147.5	64.1727	147.6	44.2274	147.5	713.753	147.7	609.102	147.6	166.23
147.6	204.962	147.6	64.2188	147.7	44.3055	147.6	713.761	147.8	609.09	147.7	166.242
147.7	205.075	147.7	64.2742	147.8	44.3758	147.7	713.765	147.9	609.059	147.8	166.238
147.8	205.144	147.8	64.3156	147.9	44.4383	147.8	713.77	148	609.039	147.9	166.245
147.9	205.243	147.9	64.3641	148	44.5047	147.9	713.78	148.1	609.008	148	166.258
148	205.343	148	64.4133	148.1	44.5867	148	713.789	148.2	608.993	148.1	166.27
148.1	205.457	148.1	64.4609	148.2	44.6406	148.1	713.804	148.3	608.976	148.2	166.286
148.2	205.583	148.2	64.5	148.3	44.7039	148.2	713.807	148.4	608.962	148.3	166.284
148.3	205.691	148.3	64.532	148.4	44.7547	148.3	713.804	148.5	608.945	148.4	166.289
148.4	205.802	148.4	64.5851	148.5	44.7938	148.4	713.809	148.6	608.923	148.5	166.309
148.5	205.921	148.5	64.6219	148.6	44.8445	148.5	713.816	148.7	608.895	148.6	166.317
148.6	206.02	148.6	64.675	148.7	44.9149	148.6	713.82	148.8	608.874	148.7	166.316
148.7	206.145	148.7	64.7117	148.8	44.9656	148.7	713.83	148.9	608.852	148.8	166.309
148.8	206.258	148.8	64.75	148.9	45.0164	148.8	713.84	149	608.833	148.9	166.323
148.9	206.372	148.9	64.8055	149	45.075	148.9	713.85	149.1	608.816	149	166.333
149	206.503	149	64.8547	149.1	45.111	149	713.867	149.2	608.794	149.1	166.34
[truncated: 6,914 more rows]
