# Supplementary material for: Mutational phospho-mimicry reveals a regulatory role for the XRCC4 and XLF C-terminal tails in modulating DNA bridging during classical non-homologous end joining
Source: eLife journal article supplement (doi:10.7554/elife.22900), 2017-05-13
Supplement: supp [file elife-22900-supp-v1.zip › elife_poa_e22900_Figure_8_figure_supplement_1_source_data_2.txt.txt]

Time	X4-XLF_WT-WT	Time	X4-XLF_Asp-Asp	Time	WT-WT_Fit-1Exp	Time	WT-WT_Fit-2Exp	Time	Asp-Asp_Fit-1Exp	Time	Asp-Asp_Fit-2Exp
s	RU	s	RU	s	RU	s	RU	s	RU	s	RU
-50.6	2.09454	-50.7	1.77734	254.4	2147.80157290879	254.4	2371.96752924146	252.7	373.807583324338	252.7	571.254226754724
-50.5	1.92657	-50.6	1.87891	259.218181818182	2018.15215117588	259.281818181818	2147.43024275432	257.615151515152	347.535487345733	257.518181818182	387.754579389956
-50.4	1.97736	-50.5	1.87891	264.036363636364	1898.07762788402	264.163636363636	1955.50060851322	262.530303030303	324.081461357876	262.336363636364	301.241659173256
-50.3	2.03595	-50.4	1.91797	268.854545454545	1786.8708754662	269.045454545455	1791.02867460515	267.445454545455	303.143225768029	267.154545454545	259.327608897207
-50.2	2.05548	-50.3	1.95703	273.672727272727	1683.87698930052	273.927272727273	1649.69366095481	272.360606060606	284.450924930515	271.972727272727	237.962657978888
-50.1	2.09454	-50.2	1.96875	278.490909090909	1588.48943092947	278.809090909091	1527.86990397053	277.275757575758	267.76364919991	276.790909090909	226.104816280761
-50	2.11798	-50.1	1.96875	283.309090909091	1500.14645611102	283.690909090909	1422.514493472	282.190909090909	252.866330045363	281.609090909091	218.682989844837
-49.9	2.11798	-50	1.96875	288.127272727273	1418.32780666604	288.572727272727	1331.07309109249	287.106060606061	239.566968209722	286.427272727273	213.366923605374
-49.8	2.11798	-49.9	1.96875	292.945454545455	1342.55164664021	293.454545454545	1251.40098758058	292.021212121212	227.694159189496	291.245454545454	209.084544910295
-49.7	2.12579	-49.8	1.96875	297.763636363636	1272.37172473718	298.336363636364	1181.69693268789	296.936363636364	217.094884143606	296.063636363636	205.341394931306
-49.6	2.13751	-49.7	1.96875	302.581818181818	1207.37474631234	303.218181818182	1120.44767050665	301.851515151515	207.632537759777	300.881818181818	201.908232664257
-49.5	2.14532	-49.6	1.96875	307.4	1147.17793945075	308.1	1066.38144768946	306.766666666667	199.18516766136	305.7	198.67763674478
-49.4	2.15704	-49.5	1.97656	312.218181818182	1091.42680079556	312.981818181818	1018.42904240155	311.681818181818	191.643902663749	310.518181818182	195.598180342665
-49.3	2.15704	-49.4	1.97656	317.036363636364	1039.79300785206	317.863636363636	975.691096886891	316.59696969697	184.911549623499	315.336363636364	192.64421356564
-49.2	2.16486	-49.3	1.97656	321.854545454545	991.972485472777	322.745454545454	937.410733520248	321.512121212121	178.901340796079	320.154545454545	189.801990433005
-49.1	2.17657	-49.2	1.97656	326.672727272727	947.683615136821	327.627272727273	902.95059932428	326.427272727273	173.535815557987	324.972727272727	187.063298386932
-49	2.17657	-49.1	1.97656	331.490909090909	906.665576478076	332.509090909091	871.773622314756	331.342424242425	168.74582208068	329.790909090909	184.422531689553
-48.9	2.18829	-49	1.96875	336.309090909091	868.676811295134	337.390909090909	843.42687902321	336.257575757576	164.469626089698	334.609090909091	181.875345709964
-48.8	2.18829	-48.9	1.97656	341.127272727273	833.493600997559	342.272727272727	817.528069759762	341.172727272728	160.652115222527	339.427272727273	179.418036950191
-48.7	2.18829	-48.8	1.97656	345.945454545454	800.908749110896	347.154545454545	793.754179658113	346.087878787879	157.244088730827	344.245454545454	177.047256277839
-48.6	2.18829	-48.7	1.97656	350.763636363636	770.730361081622	352.036363636364	771.83197183634	351.003030303031	154.201623372574	349.063636363636	174.759875183408
-48.5	2.18829	-48.6	1.97656	355.581818181818	742.780714196218	356.918181818182	751.530016245652	355.918181818182	151.485507321622	353.881818181818	172.55292235283
-48.4	2.19611	-48.5	1.97656	360.4	716.895210959232	361.8	732.652005753577	360.833333333334	149.06073479883	358.7	170.423552587527
-48.3	2.19611	-48.4	1.97656	365.218181818182	692.921409766706	366.681818181818	715.031151217741	365.748484848485	146.89605491145	363.518181818182	168.369030641658
-48.2	2.20782	-48.3	1.96875	370.036363636364	670.718127166521	371.563636363636	698.525481008025	370.663636363637	144.96356888615	368.336363636364	166.386721973251
-48.1	2.20782	-48.2	1.96875	374.854545454545	650.154606418825	376.445454545454	683.013898681957	375.578787878788	143.23837050474	373.154545454545	164.474086733263
-48	2.21564	-48.1	1.95703	379.672727272727	631.109747460114	381.327272727273	668.392876193441	380.49393939394	141.698225108469	377.972727272727	162.628675302946
-47.9	2.21564	-48	1.95703	384.490909090909	613.471393736185	386.209090909091	654.573679858357	385.409090909091	140.323283033858	382.790909090909	160.848124601795
-47.8	2.21954	-47.9	1.95392	389.309090909091	597.135671704066	391.090909090909	641.480042932358	390.324242424243	139.095823786755	387.609090909091	159.130154806972
-47.7	2.19846	-47.8	1.93671	394.127272727273	582.00637911319	395.972727272727	629.04621259619	395.239393939395	138.000027657507	392.427272727273	157.472566317341
-47.6	2.16095	-47.7	1.90234	398.945454545454	567.994418463379	400.854545454545	617.215310827673	400.154545454546	137.021771833772	397.245454545454	155.873236883564
-47.5	2.09766	-47.6	1.87109	403.763636363636	555.017272303203	405.736363636363	605.937958432351	405.069696969698	136.148448383244	402.063636363636	154.330118866311
-47.4	2.04297	-47.5	1.84686	408.581818181818	542.998517278734	410.618181818182	595.171119712743	409.984848484849	135.36880176041	406.881818181818	152.841236603342
-47.3	2.01642	-47.4	1.80469	413.4	531.867374070878	415.5	584.877132135687	414.900000000001	134.672783743112	411.7	151.404683874866
-47.2	1.99689	-47.3	1.75702	418.218181818182	521.558290570837	420.381818181818	575.022891123369	419.815151515152	134.051423929299	416.518181818182	150.018621460626
-47.1	1.97424	-47.2	1.73047	423.036363636363	512.010555838988	425.263636363636	565.579164926632	424.730303030304	133.496714124918	421.336363636363	148.681274784044
-47	1.95313	-47.1	1.71094	427.854545454545	503.167942573767	430.145454545454	556.520018589918	429.645454545455	133.001505132904	426.154545454545	147.390931639731
-46.9	1.93359	-47	1.69141	432.672727272727	494.978375985008	435.027272727273	547.822329412454	434.560606060607	132.559414613077	430.972727272727	146.145940001119
-46.8	1.90704	-46.9	1.67499	437.490909090909	487.393627121739	439.909090909091	539.465379156067	439.475757575758	132.164744825427	435.790909090909	144.944705905265
-46.7	1.89221	-46.8	1.66016	442.309090909091	480.369028848392	444.790909090909	531.430510635275	444.39090909091	131.81240919664	440.609090909091	143.785691412053
-46.6	1.88281	-46.7	1.63281	447.127272727273	473.863212796805	449.672727272727	523.700838324542	449.306060606061	131.497866763453	445.427272727273	142.667412635142
-46.5	1.86798	-46.6	1.62421	451.945454545454	467.837865744907	454.554545454545	516.261004293326	454.221212121213	131.217063647925	450.245454545454	141.588437842145
-46.4	1.84845	-46.5	1.60626	456.763636363636	462.257503987373	459.436363636363	509.096972184155	459.136363636364	130.966380810347	455.063636363636	140.547385621567
-46.3	1.83203	-46.4	1.59686	461.581818181818	457.089264369518	464.318181818182	502.19585312622	464.051515151516	130.742587406422	459.881818181818	139.54292311419
-46.2	1.8219	-46.3	1.58203	466.4	452.302710753795	469.2	495.545758463829	468.966666666668	130.542799147585	464.7	138.573764306607
-46.1	1.82031	-46.2	1.57031	471.218181818182	447.869654779178	474.081818181818	489.135675006203	473.881818181819	130.364441127782	469.518181818182	137.63866838474
-46	1.81018	-46.1	1.57501	476.036363636363	443.763989857857	478.963636363636	482.955359198413	478.796969696971	130.20521463763	474.336363636363	136.736438145226
-45.9	1.80783	-46	1.5625	480.854545454545	439.961537431658	483.845454545454	476.995247194455	483.712121212122	130.06306753825	479.154545454545	135.865918462639
-45.8	1.79065	-45.9	1.54141	485.672727272727	436.439904582755	488.727272727272	471.246378300574	488.627272727274	129.936167812943	483.972727272727	135.025994810578
-45.7	1.77344	-45.8	1.52423	490.490909090909	433.178352160161	493.609090909091	465.700329665342	493.542424242425	129.822879955832	488.790909090909	134.215591834742
-45.6	1.75159	-45.7	1.51483	495.309090909091	430.15767264536	498.490909090909	460.349160435291	498.457575757577	129.721743893184	493.609090909091	133.433671976157
-45.5	1.74219	-45.6	1.5047	500.127272727273	427.360077037842	503.372727272727	455.185363881856	503.372727272728	129.631456165719	498.427272727272	132.679234142781
-45.4	1.72736	-45.5	1.49219	504.945454545454	424.76909009439	508.254545454545	450.201826245941	508.28787878788	129.5508531294	503.245454545454	131.951312427813
-45.3	1.71094	-45.4	1.47577	509.763636363636	422.369453305178	513.136363636363	445.391791248097	513.203030303031	129.478895958184	508.063636363636	131.248974873039
-45.2	1.68909	-45.3	1.46405	514.581818181818	420.1470350353	518.018181818182	440.748829381351	518.118181818183	129.414657255452	512.881818181818	130.571322275649
-45.1	1.68439	-45.2	1.45703	519.4	418.088747302552	522.9	436.266811245484	523.033333333334	129.357309101558	517.7	129.917487036981
-45	1.67969	-45.1	1.44141	524.218181818182	416.182468701354	527.781818181818	431.939884300388	527.948484848486	129.306112383455	522.518181818182	129.286632051744
-44.9	1.65704	-45	1.42657	529.036363636364	414.416973018914	532.663636363636	427.762452515798	532.863636363637	129.260407268878	527.336363636364	128.677949636262
-44.8	1.64532	-44.9	1.42188	533.854545454545	412.781863123248	537.545454545454	423.729158478211	537.778787878789	129.21960470231	532.154545454545	128.090660494404
-44.7	1.63751	-44.8	1.41718	538.672727272727	411.267509733718	542.427272727272	419.834867585922	542.69393939394	129.183178813128	536.972727272727	127.524012719848
-44.6	1.62579	-44.7	1.41016	543.490909090909	409.864994713498	547.309090909091	416.074654021819	547.609090909092	129.150660138099	541.790909090909	126.977280833417
-44.5	1.62268	-44.6	1.41016	548.309090909091	408.566058550023	552.190909090909	412.443788242905	552.524242424243	129.121629570843	546.609090909091	126.449764854243
-44.4	1.60156	-44.5	1.39844	553.127272727273	407.363051714117	557.072727272727	408.937725766819	557.439393939395	129.09571296033	551.427272727273	125.940789403588
-44.3	1.58673	-44.4	1.39532	557.945454545455	406.248889611368	561.954545454545	405.552097070339	562.354545454546	129.072576288745	556.245454545455	125.449702840155
-44.2	1.57501	-44.3	1.38593	562.763636363637	405.21701086043	566.836363636363	402.282698443914	567.269696969698	129.051921366616	561.063636363637	124.975876425787
-44.1	1.57031	-44.2	1.37891	567.581818181819	404.261338652582	571.718181818182	399.125483670729	572.184848484849	129.033481989689	565.881818181819	124.518703520498
-44	1.56018	-44.1	1.36407	572.4	403.376244964951	576.6	396.07655641925	577.100000000001	129.017020508048	570.7	124.077598805793
-43.9	1.55548	-44	1.35938	577.218181818182	402.556517416689	581.481818181818	393.13216325545	582.015151515152	129.002324763234	575.518181818182	123.651997535279
-43.8	1.55078	-43.9	1.35468	582.036363636364	401.797328572872	586.363636363636	390.288687195324	586.930303030304	128.989205353916	580.336363636364	123.241354811624
-43.7	1.54376	-43.8	1.34766	586.854545454546	401.094207515398	591.245454545454	387.542641730451	591.845454545455	128.977493194851	585.154545454546	122.845144888928
-43.6	1.54065	-43.7	1.33984	591.672727272728	400.443013513418	596.127272727272	384.890665269553	596.760606060607	128.967037337682	589.972727272728	122.462860499602
-43.5	1.53125	-43.6	1.33514	596.49090909091	399.839911638275	601.009090909091	382.329515947554	601.675757575758	128.957703025491	594.79090909091	122.09401220492
-43.4	1.53125	-43.5	1.32813	601.309090909092	399.281350179333	605.890909090909	379.856066760873	606.590909090909	128.949369956029	599.609090909092	121.738127768391
-43.3	1.52112	-43.4	1.32501	606.127272727274	398.764039727691	610.772727272727	377.467300993717	611.506060606061	128.941930731238	604.427272727273	121.394751551149
-43.2	1.51642	-43.3	1.32031	610.945454545455	398.284933804622	615.654545454545	375.160307905249	616.421212121212	128.935289473086	609.245454545455	121.063443928604
-43.1	1.51172	-43.2	1.30859	615.763636363637	397.841210920633	620.536363636363	372.932278651805	621.336363636364	128.929360587876	614.063636363637	120.743780727588
-43	1.50159	-43.1	1.30078	620.581818181819	397.430257959513	625.418181818181	370.780502421961	626.251515151515	128.924067663097	618.881818181819	120.435352683285
-42.9	1.49219	-43	1.28906	625.400000000001	397.049654789499	630.3	368.702362765271	631.166666666667	128.919342482609	623.700000000001	120.137764915254
-42.8	1.48206	-42.9	1.28436	630.218181818183	396.697160010951	635.181818181818	366.695334098127	636.081818181818	128.915124147457	628.518181818183	119.850636421856
-42.7	1.47266	-42.8	1.27423	635.036363636365	396.370697756578	640.063636363636	364.75697837231	640.99696969697	128.911358291	633.336363636365	119.573599592467
-42.6	1.45392	-42.7	1.26483	639.854545454547	396.068345466512	644.945454545454	362.884941893706	645.912121212121	128.907996378221	638.154545454547	119.306299736817
-42.5	1.45081	-42.6	1.26953	644.672727272728	395.788322566213	649.827272727272	361.076952280157	650.827272727273	128.904995080199	642.972727272728	119.048394630886
-42.4	1.44611	-42.5	1.26642	649.49090909091	395.528979980531	654.70909090909	359.330815548815	655.742424242424	128.90231571568	647.79090909091	118.799554078752
-42.3	1.44141	-42.4	1.25702	654.309090909092	395.288790422192	659.590909090909	357.644413324407	660.657575757576	128.899923752546	652.609090909092	118.559459489841
-42.2	1.43439	-42.3	1.25	659.127272727274	395.066339397485	664.472727272727	356.015700160874	665.572727272727	128.897788362755	657.427272727274	118.327803471037
-42.1	1.43439	-42.2	1.2453	663.945454545456	394.860316876207	669.354545454545	354.442700969567	670.487878787879	128.895882025032	662.245454545456	118.104289433127
-42	1.42657	-42.1	1.23517	668.763636363638	394.669509576806	674.236363636363	352.923508547972	675.40303030303	128.894180170161	667.063636363638	117.888631211074
-41.9	1.41876	-42	1.23047	673.58181818182	394.492793821271	679.118181818181	351.456281203466	680.318181818182	128.892660864339	671.88181818182	117.680552697646
-41.8	1.40704	-41.9	1.23047	678.400000000002	394.329128917715	684	350.039240467163	685.233333333333	128.891304526487	676.700000000002	117.479787489908
-41.7	1.40234	-41.8	1.22577	683.218181818183	394.177551031664	688.881818181818	348.67066889334	690.148484848485	128.890093675885	681.518181818183	117.286078548154
-41.6	1.39221	-41.7	1.21875	688.036363636365	394.037167509964	693.763636363636	347.34890794032	695.063636363636	128.889012706879	686.336363636365	117.099177866814
-41.5	1.38751	-41.6	1.20392	692.854545454547	393.907151623885	698.645454545454	346.072355929022	699.978787878788	128.88804768775	691.154545454547	116.918846156936
-41.4	1.38751	-41.5	1.19922	697.672727272729	393.786737700456	703.527272727272	344.839466075683	704.893939393939	128.887186181164	695.972727272729	116.744852539822
-41.3	1.38751	-41.4	1.19922	702.490909090911	393.675216613356	708.40909090909	343.648744595504	709.809090909091	128.886417083873	700.790909090911	116.576974251432
-41.2	1.38751	-41.3	1.19141	707.309090909093	393.571931606825	713.290909090909	342.498748874221	714.724242424242	128.885730483615	705.609090909093	116.414996357185
-41.1	1.38751	-41.2	1.19141	712.127272727275	393.476274427975	718.172727272727	341.388085704763	719.639393939393	128.885117531367	710.427272727275	116.258711476773
-41	1.38751	-41.1	1.19141	716.945454545457	393.38768174475	723.054545454545	340.315409586367	724.554545454545	128.884570327293	715.245454545456	116.107919518655
-40.9	1.38751	-41	1.17499	721.763636363638	393.305631828421	727.936363636363	339.279421083665	729.469696969696	128.884081818932	720.063636363638	115.962427423879
-40.8	1.38281	-40.9	1.16797	726.58181818182	393.229641481085	732.818181818181	338.278865243406	734.384848484848	128.8836457103	724.88181818182	115.822048918906
-40.7	1.37579	-40.8	1.16797	731.4	393.159263190082	737.7	337.312530066578	739.3	128.883256380756	729.7	115.68660427713
-40.6	1.37579	-40.7	1.16486
-40.5	1.37579	-40.6	1.15546
-40.4	1.37268	-40.5	1.14063
-40.3	1.36798	-40.4	1.14063
-40.2	1.35156	-40.3	1.13593
-40.1	1.34454	-40.2	1.12579
-40	1.34454	-40.1	1.11719
-39.9	1.34454	-40	1.12421
-39.8	1.34454	-39.9	1.11719
-39.7	1.34143	-39.8	1.11719
-39.6	1.33673	-39.7	1.11407
-39.5	1.32892	-39.6	1.10938
-39.4	1.33203	-39.5	1.09686
-39.3	1.33673	-39.4	1.08673
-39.2	1.33673	-39.3	1.07733
-39.1	1.34454	-39.2	1.08282
-39	1.35626	-39.1	1.10468
-38.9	1.35626	-39	1.10236
-38.8	1.35626	-38.9	1.11719
-38.7	1.36407	-38.8	1.13361
-38.6	1.37579	-38.7	1.14844
-38.5	1.38049	-38.6	1.16327
-38.4	1.38361	-38.5	1.18439
-38.3	1.40784	-38.4	1.17578
-38.2	1.45001	-38.3	1.14764
-38.1	1.48987	-38.2	1.14532
-38	1.3797	-38.1	1.12735
-37.9	1.0961	-38	1.03046
-37.8	0.846893	-37.9	0.857025
-37.7	0.682831	-37.8	0.674988
-37.6	0.650787	-37.7	0.580475
-37.5	0.707825	-37.6	0.516418
-37.4	0.790649	-37.5	0.563293
-37.3	0.857819	-37.4	0.649231
-37.2	0.903137	-37.3	0.695313
-37.1	0.935181	-37.2	0.731262
-37	0.981262	-37.1	0.765625
-36.9	1.0094	-37	0.808594
-36.8	1.01953	-36.9	0.816406
-36.7	1.02893	-36.8	0.832825
-36.6	1.02814	-36.7	0.839844
-36.5	1.01642	-36.6	0.839844
-36.4	1.01953	-36.5	0.839844
-36.3	1.02423	-36.4	0.842957
-36.2	1.02423	-36.3	0.864075
-36.1	1.02893	-36.2	0.871094
-36	1.04376	-36.1	0.871094
-35.9	1.05859	-36	0.878906
-35.8	1.07266	-35.9	0.882019
-35.7	1.08673	-35.8	0.891418
-35.6	1.09845	-35.7	0.914856
-35.5	1.08984	-35.6	0.924988
-35.4	1.09924	-35.5	0.9375
-35.3	1.10626	-35.4	0.953918
-35.2	1.10938	-35.3	0.96405
-35.1	1.11407	-35.2	0.96875
-35	1.11407	-35.1	0.96875
-34.9	1.09924	-35	0.965637
-34.8	1.08673	-34.9	0.960938
-34.7	1.08984	-34.8	0.960938
-34.6	1.07501	-34.7	0.96405
-34.5	1.07501	-34.6	0.953918
-34.4	1.07501	-34.5	0.960938
-34.3	1.07501	-34.4	0.960938
-34.2	1.06018	-34.3	0.960938
-34.1	1.05078	-34.2	0.96875
-34	1.05548	-34.1	0.96405
-33.9	1.0672	-34	0.965637
-33.8	1.0672	-33.9	0.960938
-33.7	1.0719	-33.8	0.972656
-33.6	1.07892	-33.7	0.980469
-33.5	1.0672	-33.6	0.980469
-33.4	1.0672	-33.5	0.987488
-33.3	1.0625	-33.4	0.980469
-33.2	1.06018	-33.3	0.983582
-33.1	1.0672	-33.2	0.97345
-33	1.0672	-33.1	0.980469
-32.9	1.05078	-33	0.980469
-32.8	1.04376	-32.9	0.975769
-32.7	1.05078	-32.8	0.96875
-32.6	1.04376	-32.7	0.965637
-32.5	1.04065	-32.6	0.960938
-32.4	1.03595	-32.5	0.956238
-32.3	1.03595	-32.4	0.949219
-32.2	1.02423	-32.3	0.949219
-32.1	1.03125	-32.2	0.949219
-32	1.02423	-32.1	0.949219
-31.9	1.03284	-32	0.949219
-31.8	1.02344	-31.9	0.949219
-31.7	1.01331	-31.8	0.946106
-31.6	1.00861	-31.7	0.944519
-31.5	1.00391	-31.6	0.9375
-31.4	1.00159	-31.5	0.934387
-31.3	0.992188	-31.4	0.924988
-31.2	0.985168	-31.3	0.910156
-31.1	0.980469	-31.2	0.898438
-31	0.970337	-31.1	0.893738
-30.9	0.965637	-31	0.883606
-30.8	0.965637	-30.9	0.874207
-30.7	0.965637	-30.8	0.864075
-30.6	0.977356	-30.7	0.854675
-30.5	0.977356	-30.6	0.847656
-30.4	0.977356	-30.5	0.847656
-30.3	0.977356	-30.4	0.847656
-30.2	0.977356	-30.3	0.844543
-30.1	0.980469	-30.2	0.839844
-30	0.97345	-30.1	0.846863
-29.9	0.97345	-30	0.828125
-29.8	0.97345	-29.9	0.828125
-29.7	0.970337	-29.8	0.828125
-29.6	0.980469	-29.7	0.823425
-29.5	0.985168	-29.6	0.816406
-29.4	0.985168	-29.5	0.825012
-29.3	0.982056	-29.4	0.820313
-29.2	0.977356	-29.3	0.820313
-29.1	0.972656	-29.2	0.820313
-29	0.965637	-29.1	0.820313
-28.9	0.965637	-29	0.820313
-28.8	0.962524	-28.9	0.820313
-28.7	0.957825	-28.8	0.808594
-28.6	0.957825	-28.7	0.808594
-28.5	0.941406	-28.6	0.808594
-28.4	0.934387	-28.5	0.803894
-28.3	0.934387	-28.4	0.808594
-28.2	0.929688	-28.3	0.805481
-28.1	0.922668	-28.2	0.800781
-28	0.922668	-28.1	0.789063
-27.9	0.922668	-28	0.789063
-27.8	0.922668	-27.9	0.784363
-27.7	0.922668	-27.8	0.789063
-27.6	0.934387	-27.7	0.789063
-27.5	0.934387	-27.6	0.774231
-27.4	0.931274	-27.5	0.769531
-27.3	0.914856	-27.4	0.769531
-27.2	0.910156	-27.3	0.772644
-27.1	0.900024	-27.2	0.777344
-27	0.895325	-27.1	0.777344
-26.9	0.895325	-27	0.782043
-26.8	0.890625	-26.9	0.784363
-26.7	0.883606	-26.8	0.777344
-26.6	0.883606	-26.7	0.777344
-26.5	0.883606	-26.6	0.774231
-26.4	0.883606	-26.5	0.769531
-26.3	0.883606	-26.4	0.769531
-26.2	0.883606	-26.3	0.769531
-26.1	0.875793	-26.2	0.761719
-26	0.875793	-26.1	0.764832
-25.9	0.872681	-26	0.769531
-25.8	0.867981	-25.9	0.777344
-25.7	0.867981	-25.8	0.769531
-25.6	0.863281	-25.7	0.769531
-25.5	0.856262	-25.6	0.769531
-25.4	0.856262	-25.5	0.769531
-25.3	0.841431	-25.4	0.757813
-25.2	0.839844	-25.3	0.762512
-25.1	0.844543	-25.2	0.769531
-25	0.836731	-25.1	0.769531
-24.9	0.833618	-25	0.769531
-24.8	0.832031	-24.9	0.757019
-24.7	0.821899	-24.8	0.75
-24.6	0.8172	-24.7	0.742981
-24.5	0.8172	-24.6	0.75
-24.4	0.8172	-24.5	0.75
-24.3	0.805481	-24.4	0.75
-24.2	0.805481	-24.3	0.741394
-24.1	0.805481	-24.2	0.746094
-24	0.805481	-24.1	0.742981
-23.9	0.797668	-24	0.75
-23.8	0.792969	-23.9	0.75
-23.7	0.774231	-23.8	0.738281
-23.6	0.774231	-23.7	0.738281
-23.5	0.769531	-23.6	0.742981
-23.4	0.762512	-23.5	0.742188
-23.3	0.759399	-23.4	0.742188
-23.2	0.746887	-23.3	0.742188
-23.1	0.746887	-23.2	0.737488
-23	0.730469	-23.1	0.730469
-22.9	0.72345	-23	0.730469
-22.8	0.72345	-22.9	0.730469
-22.7	0.72345	-22.8	0.730469
-22.6	0.715637	-22.7	0.71875
-22.5	0.715637	-22.6	0.71875
-22.4	0.712524	-22.5	0.71875
-22.3	0.707825	-22.4	0.710938
-22.2	0.703125	-22.3	0.710938
-22.1	0.684387	-22.2	0.710938
-22	0.684387	-22.1	0.699219
-21.9	0.684387	-22	0.710938
-21.8	0.684387	-21.9	0.710938
-21.7	0.681274	-21.8	0.710938
-21.6	0.676575	-21.7	0.710938
-21.5	0.676575	-21.6	0.710938
-21.4	0.671875	-21.5	0.699219
-21.3	0.664856	-21.4	0.694519
-21.2	0.664856	-21.3	0.6875
-21.1	0.661743	-21.2	0.684387
-21	0.657043	-21.1	0.679688
-20.9	0.657043	-21	0.679688
-20.8	0.652344	-20.9	0.679688
-20.7	0.645325	-20.8	0.674988
-20.6	0.645325	-20.7	0.667969
-20.5	0.652344	-20.6	0.664856
-20.4	0.645325	-20.5	0.660156
-20.3	0.645325	-20.4	0.652344
-20.2	0.642212	-20.3	0.652344
-20.1	0.637512	-20.2	0.660156
-20	0.637512	-20.1	0.655457
-19.9	0.637512	-20	0.648438
-19.8	0.637512	-19.9	0.648438
-19.7	0.640625	-19.8	0.648438
-19.6	0.633606	-19.7	0.648438
-19.5	0.630493	-19.6	0.657043
-19.4	0.637512	-19.5	0.652344
-19.3	0.637512	-19.4	0.647644
-19.2	0.637512	-19.3	0.648438
-19.1	0.637512	-19.2	0.643738
-19	0.640625	-19.1	0.636719
-18.9	0.633606	-19	0.633606
-18.8	0.633606	-18.9	0.628906
-18.7	0.642212	-18.8	0.635925
-18.6	0.637512	-18.7	0.625793
-18.5	0.621094	-18.6	0.624207
-18.4	0.625793	-18.5	0.617188
-18.3	0.625793	-18.4	0.625793
-18.2	0.621094	-18.3	0.621094
-18.1	0.610962	-18.2	0.624207
-18	0.606262	-18.1	0.617188
-17.9	0.606262	-18	0.614075
-17.8	0.614075	-17.9	0.616394
-17.7	0.609375	-17.8	0.609375
-17.6	0.602356	-17.7	0.604675
-17.5	0.599243	-17.6	0.606262
-17.4	0.606262	-17.5	0.601563
-17.3	0.606262	-17.4	0.604675
-17.2	0.606262	-17.3	0.594543
-17.1	0.601563	-17.2	0.601563
-17	0.594543	-17.1	0.601563
-16.9	0.591431	-17	0.604675
-16.8	0.582031	-16.9	0.606262
-16.7	0.575012	-16.8	0.601563
-16.6	0.575012	-16.7	0.604675
-16.5	0.575012	-16.6	0.606262
-16.4	0.571899	-16.5	0.601563
-16.3	0.578918	-16.4	0.596863
-16.2	0.574219	-16.3	0.601563
-16.1	0.5672	-16.2	0.601563
-16	0.575012	-16.1	0.601563
-15.9	0.570313	-16	0.604675
-15.8	0.563293	-15.9	0.594543
-15.7	0.560181	-15.8	0.601563
-15.6	0.555481	-15.7	0.596863
-15.5	0.555481	-15.6	0.589844
-15.4	0.555481	-15.5	0.594543
-15.3	0.550781	-15.4	0.596863
-15.2	0.543762	-15.3	0.592957
-15.1	0.555481	-15.2	0.597656
-15	0.552368	-15.1	0.594543
-14.9	0.555481	-15	0.601563
-14.8	0.555481	-14.9	0.601563
-14.7	0.550781	-14.8	0.589844
-14.6	0.555481	-14.7	0.596863
-14.5	0.555481	-14.6	0.594543
-14.4	0.547668	-14.5	0.589844
-14.3	0.53595	-14.4	0.596863
-14.2	0.532837	-14.3	0.589844
-14.1	0.528137	-14.2	0.589844
-14	0.523438	-14.1	0.582031
-13.9	0.511719	-14	0.573425
-13.8	0.501587	-13.9	0.575012
-13.7	0.496887	-13.8	0.565613
-13.6	0.5047	-13.7	0.563293
-13.5	0.5	-13.6	0.558594
-13.4	0.489868	-13.5	0.565613
-13.3	0.485168	-13.4	0.555481
-13.2	0.480469	-13.3	0.546082
-13.1	0.470337	-13.2	0.550781
-13	0.460938	-13.1	0.53595
-12.9	0.460938	-13	0.538269
-12.8	0.450806	-12.9	0.53125
-12.7	0.446106	-12.8	0.534363
-12.6	0.453125	-12.7	0.524231
-12.5	0.450806	-12.6	0.519531
-12.4	0.446106	-12.5	0.514832
-12.3	0.446106	-12.4	0.516418
-12.2	0.453125	-12.3	0.511719
-12.1	0.431274	-12.2	0.503906
-12	0.421875	-12.1	0.4953
-11.9	0.426575	-12	0.483582
-11.8	0.423462	-11.9	0.47345
-11.7	0.426575	-11.8	0.46875
-11.6	0.421875	-11.7	0.46405
-11.5	0.426575	-11.6	0.457031
-11.4	0.426575	-11.5	0.465637
-11.3	0.434387	-11.4	0.460938
-11.2	0.434387	-11.3	0.456238
-11.1	0.426575	-11.2	0.449219
-11	0.421875	-11.1	0.449219
-10.9	0.414856	-11	0.449219
-10.8	0.411743	-10.9	0.449219
-10.7	0.407043	-10.8	0.453918
-10.6	0.407043	-10.7	0.449219
-10.5	0.402344	-10.6	0.444519
-10.4	0.400024	-10.5	0.4375
-10.3	0.395325	-10.4	0.4375
-10.2	0.390625	-10.3	0.4375
-10.1	0.375793	-10.2	0.449219
-10	0.372681	-10.1	0.449219
-9.9	0.371094	-10	0.446106
-9.8	0.353149	-9.9	0.444519
-9.7	0.351563	-9.8	0.446106
-9.6	0.344543	-9.7	0.436707
-9.5	0.332031	-9.6	0.429688
-9.4	0.321899	-9.5	0.421875
-9.3	0.3172	-9.4	0.410156
-9.2	0.300781	-9.3	0.410156
-9.1	0.290649	-9.2	0.410156
-9	0.28125	-9.1	0.410156
-8.9	0.282837	-9	0.405457
-8.8	0.273438	-8.9	0.395325
-8.7	0.266418	-8.8	0.390625
-8.6	0.266418	-8.7	0.385925
-8.5	0.261719	-8.6	0.375793
-8.4	0.2547	-8.5	0.366394
-8.3	0.251587	-8.4	0.356262
-8.2	0.246887	-8.3	0.346863
-8.1	0.242188	-8.2	0.335144
-8	0.232056	-8.1	0.328125
-7.9	0.235168	-8	0.325012
-7.8	0.235168	-7.9	0.320313
-7.7	0.230469	-7.8	0.315613
-7.6	0.22345	-7.7	0.308594
-7.5	0.220337	-7.6	0.305481
-7.4	0.215637	-7.5	0.300781
-7.3	0.203125	-7.4	0.300781
-7.2	0.192993	-7.3	0.296082
-7.1	0.183594	-7.2	0.300781
-7	0.171875	-7.1	0.297668
-6.9	0.161743	-7	0.296082
-6.8	0.149231	-6.9	0.27655
-6.7	0.132813	-6.8	0.277344
-6.6	0.125793	-6.7	0.274231
-6.5	0.122681	-6.6	0.261719
-6.4	0.113281	-6.5	0.2453
-6.3	0.103149	-6.4	0.235168
-6.2	0.09375	-6.3	0.225769
-6.1	0.086731	-6.2	0.215637
-6	0.086731	-6.1	0.206238
-5.9	0.086731	-6	0.199219
-5.8	0.0820313	-5.9	0.206238
-5.7	0.0718994	-5.8	0.196106
-5.6	0.0671997	-5.7	0.191406
-5.5	0.0703125	-5.6	0.167175
-5.4	0.0632935	-5.5	0.157043
-5.3	0.0601807	-5.4	0.152344
-5.2	0.055481	-5.3	0.147644
-5.1	0.0507813	-5.2	0.148438
-5	0.0437622	-5.1	0.148438
-4.9	0.055481	-5	0.145325
-4.8	0.0523682	-4.9	0.140625
-4.7	0.0476685	-4.8	0.140625
-4.6	0.0429688	-4.7	0.140625
-4.5	0.0359497	-4.6	0.135925
-4.4	0.0359497	-4.5	0.128906
-4.3	0.0359497	-4.4	0.128906
-4.2	0.0359497	-4.3	0.124207
-4.1	0.0359497	-4.2	0.117188
-4	0.0359497	-4.1	0.128906
-3.9	0.0390625	-4	0.125793
-3.8	0.0320435	-3.9	0.121094
-3.7	0.0289307	-3.8	0.124207
-3.6	0.0359497	-3.7	0.117188
-3.5	0.0359497	-3.6	0.128906
-3.4	0.03125	-3.5	0.125793
-3.3	0.024231	-3.4	0.121094
-3.2	0.0359497	-3.3	0.121094
-3.1	0.0359497	-3.2	0.116394
-3	0.0406494	-3.1	0.117188
-2.9	0.0281372	-3	0.117188
-2.8	0.0281372	-2.9	0.114075
-2.7	0.0359497	-2.8	0.109375
-2.6	0.03125	-2.7	0.121094
-2.5	0.024231	-2.6	0.109375
-2.4	0.024231	-2.5	0.104675
-2.3	0.024231	-2.4	0.0898438
-2.2	0.0211182	-2.3	0.0976563
-2.1	0.0117188	-2.2	0.0929565
-2	0.00469971	-2.1	0.0976563
-1.9	0.00469971	-2	0.0859375
-1.8	0.00469971	-1.9	0.0828247
-1.7	0.00469971	-1.8	0.078125
-1.6	0.00158691	-1.7	0.078125
-1.5	-0.00311279	-1.6	0.0734253
-1.4	-0.00311279	-1.5	0.0585938
-1.3	-0.0078125	-1.4	0.0585938
-1.2	-0.00311279	-1.3	0.055481
-1.1	-0.00311279	-1.2	0.0507813
-1	-2.27374E-13	-1.1	0.0460815
-0.900002	-0.00701904	-1	0.0390625
-0.799999	-0.0148315	-0.899998	0.0390625
-0.700001	-0.00701904	-0.799999	0.0359497
-0.600002	-0.00701904	-0.700001	0.03125
-0.5	-0.00701904	-0.599998	0.03125
-0.400002	-0.0101318	-0.5	0.0148315
-0.299999	-2.27374E-13	-0.399998	0.0078125
-0.200001	0.00158691	-0.299999	0.0078125
-0.100002	0.00469971	-0.200001	0.00469971
0	-2.27374E-13	-0.0999985	0
0.0999985	0.00469971	0	0
0.200001	0.00469971	0.100002	0
0.299999	0.00158691	0.200001	-0.0078125
0.399998	-2.27374E-13	0.299999	-0.00469971
0.5	0.00469971	0.400002	-0.0117188
0.599998	0.00939941	0.5	-0.0117188
0.700001	0.00469971	0.600002	-0.0117188
0.799999	0.0164185	0.700001	-0.0117188
0.899998	0.0164185	0.799999	-0.0117188
1	0.0117188	0.900002	-0.0117188
1.1	0.0211182	1	-0.0117188
1.2	0.0234375	1.1	-0.0164185
1.3	0.024231	1.2	-0.03125
1.4	0.024231	1.3	-0.03125
1.5	0.0211182	1.4	-0.03125
1.6	0.0281372	1.5	-0.0429688
1.7	0.0234375	1.6	-0.0429688
1.8	0.0164185	1.7	-0.0460815
1.9	0.024231	1.8	-0.0507813
2	0.0211182	1.9	-0.0585938
2.1	0.0164185	2	-0.0585938
2.2	0.0281372	2.1	-0.0585938
2.3	0.0234375	2.2	-0.0703125
2.4	0.0164185	2.3	-0.0703125
2.5	0.024231	2.4	-0.0703125
2.6	0.024231	2.5	-0.0671997
2.7	0.0195313	2.6	-0.0625
2.8	0.0125122	2.7	-0.0625
2.9	0.00939941	2.8	-0.0734253
3	0.0164185	2.9	-0.0703125
3.1	0.0164185	3	-0.0703125
3.2	0.0117188	3.1	-0.0703125
3.3	0.0164185	3.2	-0.0703125
3.4	0.0211182	3.3	-0.0703125
3.5	0.0164185	3.4	-0.0703125
3.6	0.0164185	3.5	-0.078125
3.7	0.0234375	3.6	-0.0750122
3.8	0.024231	3.7	-0.0820313
3.9	0.024231	3.8	-0.0734253
4	0.0211182	3.9	-0.0750122
4.1	0.0281372	4	-0.0703125
4.2	0.0234375	4.1	-0.0703125
4.3	0.0117188	4.2	-0.0773315
4.4	0.00469971	4.3	-0.0703125
4.5	0.00158691	4.4	-0.0703125
4.6	-0.0078125	4.5	-0.0703125
4.7	-0.0179443	4.6	-0.0820313
4.8	-0.0343628	4.7	-0.0820313
4.9	-0.0421753	4.8	-0.0773315
5	-0.0585938	4.9	-0.078125
5.1	-0.085144	5	-0.078125
5.2	-0.0968628	5.1	-0.086731
5.3	-0.119507	5.2	-0.0898438
5.4	-0.132019	5.3	-0.101563
5.5	-0.15155	5.4	-0.121094
5.6	-0.1875	5.5	-0.121094
5.7	-0.21405	5.6	-0.128113
5.8	-0.236694	5.7	-0.133606
5.9	-0.272644	5.8	-0.147644
6	-0.308594	5.9	-0.148438
6.1	-0.335144	6	-0.160156
6.2	-0.362488	6.1	-0.167969
6.3	-0.390625	6.2	-0.179688
6.4	-0.417175	6.3	-0.199219
6.5	-0.439819	6.4	-0.210938
6.6	-0.46405	6.5	-0.21875
6.7	-0.5	6.6	-0.238281
6.8	-0.52655	6.7	-0.25
6.9	-0.549194	6.8	-0.257813
7	-0.573425	6.9	-0.269531
7.1	-0.604675	7	-0.289063
7.2	-0.612488	7.1	-0.300781
7.3	-0.628906	7.2	-0.308594
7.4	-0.650757	7.3	-0.308594
7.5	-0.663269	7.4	-0.320313
7.6	-0.663269	7.5	-0.325012
7.7	-0.674988	7.6	-0.339844
7.8	-0.674988	7.7	-0.351563
7.9	-0.65155	7.8	-0.359375
8	-0.643738	7.9	-0.359375
8.1	-0.643738	8	-0.371094
8.2	-0.632019	8.1	-0.366394
8.3	-0.624207	8.2	-0.364075
8.4	-0.604675	8.3	-0.371094
8.5	-0.592957	8.4	-0.371094
8.6	-0.592957	8.5	-0.359375
8.7	-0.578125	8.6	-0.351563
8.8	-0.580444	8.7	-0.351563
8.9	-0.573425	8.8	-0.339844
9	-0.566406	8.9	-0.339844
9.1	-0.565613	9	-0.339844
9.2	-0.553894	9.1	-0.342957
9.3	-0.546082	9.2	-0.339844
9.4	-0.529663	9.3	-0.328125
9.5	-0.507813	9.4	-0.332825
9.6	-0.502319	9.5	-0.320313
9.7	-0.46405	9.6	-0.308594
9.8	-0.46405	9.7	-0.28125
9.9	-0.4328	9.8	-0.269531
10	-0.424988	9.9	-0.25
10.1	-0.413269	10	-0.261719
10.2	-0.424988	10.1	-0.2547
10.3	-0.413269	10.2	-0.284363
10.4	-0.424988	10.3	-0.28595
10.5	-0.4328	10.4	-0.273438
10.6	-0.4328	10.5	-0.284363
10.7	-0.4328	10.6	-0.28125
10.8	-0.421875	10.7	-0.269531
10.9	-0.417175	10.8	-0.2547
11	-0.420288	10.9	-0.2453
11.1	-0.421875	11	-0.21875
11.2	-0.397644	11.1	-0.191406
11.3	-0.389038	11.2	-0.164856
11.4	-0.413269	11.3	-0.0898438
11.5	-0.452332	11.4	-0.0703125
11.6	-0.483582	11.5	-0.171875
11.7	-0.699219	11.6	-0.222656
11.8	-1.06561	11.7	-0.514832
11.9	-1.68671	11.8	-1.23126
12	-2.85779	11.9	-1.80859
12.1	-3.57422	12	-2.51251
12.2	-3.32733	12.1	-1.91016
12.3	-1.19531	12.2	2.06561
12.4	3.375	12.3	9.16486
12.5	10.2899	12.4	19.3687
12.6	20.0766	12.5	32.1633
12.7	32.2586	12.6	46.293
12.8	46.2367	12.7	62.1523
12.9	63.018	12.8	79.6437
13	81.8406	12.9	98.3687
13.1	102.102	13	118.166
13.2	122.879	13.1	134.159
13.3	142.295	13.2	141.434
13.4	159.002	13.3	140.486
13.5	171.713	13.4	137.157
13.6	180.641	13.5	134.105
13.7	186.676	13.6	131.261
13.8	190.12	13.7	128.068
13.9	191.389	13.8	124.32
14	192.267	13.9	120.259
14.1	191.789	14	115.641
14.2	190.983	14.1	111.241
14.3	190.216	14.2	106.843
14.4	189.825	14.3	102.416
14.5	189.622	14.4	98.6227
14.6	189.82	14.5	94.8766
14.7	190.363	14.6	91.55
14.8	191.752	14.7	88.5625
14.9	193.608	14.8	86.0859
15	195.934	14.9	83.7133
15.1	199.044	15	81.7547
15.2	203.047	15.1	80.4078
15.3	207.443	15.2	79.0344
15.4	212.675	15.3	78.4953
15.5	218.827	15.4	78.4078
15.6	225.653	15.5	78.1336
15.7	233.063	15.6	78.8
15.8	241.368	15.7	79.6156
15.9	250.309	15.8	81.2031
16	259.932	15.9	82.8773
16.1	270.087	16	84.8008
16.2	281.56	16.1	87.3976
16.3	293.206	16.2	90.3398
16.4	305.507	16.3	93.6727
16.5	318.307	16.4	97.4023
16.6	331.945	16.5	101.364
16.7	346.131	16.6	105.728
16.8	360.931	16.7	110.098
16.9	376.409	16.8	115.033
17	392.213	16.9	120.302
17.1	408.503	17	125.811
17.2	425.248	17.1	131.194
17.3	442.505	17.2	136.977
17.4	460.13	17.3	142.964
17.5	477.943	17.4	149.221
17.6	496.272	17.5	155.254
17.7	514.689	17.6	161.511
17.8	533.555	17.7	168.055
17.9	552.627	17.8	174.763
18	571.819	17.9	181.299
18.1	591.175	18	187.789
18.2	610.717	18.1	194.041
18.3	630.352	18.2	200.652
18.4	650.091	18.3	207.13
18.5	669.867	18.4	213.58
18.6	689.995	18.5	219.712
18.7	710.016	18.6	226.066
18.8	729.9	18.7	232.327
18.9	749.798	18.8	238.666
19	769.82	18.9	244.942
19.1	789.76	19	250.884
19.2	809.763	19.1	256.768
19.3	829.702	19.2	262.745
19.4	849.577	19.3	268.66
19.5	869.534	19.4	274.073
19.6	889.144	19.5	279.801
19.7	908.671	19.6	285.223
19.8	928.22	19.7	290.427
19.9	947.719	19.8	295.587
20	967.143	19.9	300.793
20.1	986.603	20	305.744
20.2	1005.95	20.1	310.678
20.3	1025	20.2	315.517
20.4	1044.25	20.3	320.237
20.5	1063.21	20.4	324.678
20.6	1081.96	20.5	329.104
20.7	1100.77	20.6	333.483
20.8	1119.52	20.7	337.74
20.9	1138.14	20.8	341.929
21	1156.31	20.9	346.074
21.1	1174.64	21	349.924
21.2	1192.68	21.1	353.82
21.3	1210.5	21.2	357.57
21.4	1228.34	21.3	361.312
21.5	1245.82	21.4	364.75
21.6	1263.16	21.5	368.148
21.7	1280.53	21.6	371.52
21.8	1297.84	21.7	374.809
21.9	1314.73	21.8	378.117
22	1331.55	21.9	381.37
22.1	1348.35	22	384.38
22.2	1364.57	22.1	387.426
22.3	1380.95	22.2	390.234
22.4	1397.14	22.3	392.953
22.5	1412.99	22.4	395.773
22.6	1428.6	22.5	398.451
22.7	1444.19	22.6	401.031
22.8	1459.57	22.7	403.595
22.9	1474.74	22.8	406.07
23	1489.82	22.9	408.423
23.1	1504.38	23	410.728
23.2	1518.78	23.1	413.055
23.3	1533.51	23.2	415.274
23.4	1547.55	23.3	417.462
23.5	1561.65	23.4	419.605
23.6	1575.66	23.5	421.666
23.7	1589.03	23.6	423.654
23.8	1602.31	23.7	425.579
23.9	1615.67	23.8	427.509
24	1628.61	23.9	429.392
24.1	1641.24	24	431.283
24.2	1653.77	24.1	433.095
24.3	1666.38	24.2	434.739
24.4	1678.61	24.3	436.305
24.5	1690.54	24.4	437.877
24.6	1702.38	24.5	439.477
24.7	1713.77	24.6	441.009
24.8	1725.2	24.7	442.56
24.9	1736.32	24.8	444.103
25	1747.07	24.9	445.603
25.1	1758	25	446.997
25.2	1768.66	25.1	448.33
25.3	1779.06	25.2	449.697
25.4	1789.37	25.3	451.018
25.5	1799.31	25.4	452.287
25.6	1809.15	25.5	453.595
25.7	1818.85	25.6	454.87
25.8	1828.3	25.7	456.127
25.9	1837.63	25.8	457.373
26	1846.96	25.9	458.556
26.1	1855.8	26	459.58
26.2	1864.68	26.1	460.666
26.3	1873.18	26.2	461.733
26.4	1881.8	26.3	462.767
26.5	1890.02	26.4	463.806
26.6	1898.07	26.5	464.862
26.7	1906.06	26.6	465.891
26.8	1914.04	26.7	466.901
26.9	1921.76	26.8	467.838
27	1929.31	26.9	468.677
27.1	1936.63	27	469.522
27.2	1944.01	27.1	470.365
27.3	1951.14	27.2	471.198
27.4	1958.12	27.3	472.022
27.5	1964.65	27.4	472.853
27.6	1971.31	27.5	473.705
27.7	1977.99	27.6	474.51
27.8	1984.6	27.7	475.346
27.9	1990.77	27.8	476.147
28	1997	27.9	476.964
28.1	2002.91	28	477.686
28.2	2008.92	28.1	478.404
28.3	2014.57	28.2	479.12
28.4	2020.19	28.3	479.822
28.5	2026.06	28.4	480.541
28.6	2031.39	28.5	481.246
28.7	2036.79	28.6	481.978
28.8	2042.17	28.7	482.718
28.9	2047.41	28.8	483.436
29	2052.51	28.9	484.135
29.1	2057.4	29	484.763
29.2	2062.23	29.1	485.316
29.3	2066.99	29.2	485.888
29.4	2071.7	29.3	486.53
29.5	2076.35	29.4	487.112
29.6	2080.86	29.5	487.705
29.7	2085.29	29.6	488.332
29.8	2089.51	29.7	488.916
29.9	2093.67	29.8	489.506
30	2097.8	29.9	490.143
30.1	2101.94	30	490.698
30.2	2105.87	30.1	491.22
30.3	2109.79	30.2	491.737
30.4	2113.55	30.3	492.26
30.5	2117.36	30.4	492.803
30.6	2121.18	30.5	493.352
30.7	2124.91	30.6	493.901
30.8	2128.47	30.7	494.448
30.9	2132.03	30.8	494.959
31	2135.53	30.9	495.492
31.1	2139.01	31	496.021
31.2	2142.22	31.1	496.592
31.3	2145.5	31.2	496.968
31.4	2148.77	31.3	497.385
31.5	2152.03	31.4	497.862
31.6	2155.08	31.5	498.316
31.7	2157.97	31.6	498.769
31.8	2160.85	31.7	499.228
31.9	2163.69	31.8	499.702
32	2166.59	31.9	500.214
32.1	2169.38	32	500.69
32.2	2172.13	32.1	501.16
32.3	2174.84	32.2	501.651
32.4	2177.57	32.3	502.116
32.5	2180.25	32.4	502.592
32.6	2182.87	32.5	503.046
32.7	2185.55	32.6	503.483
32.8	2188.08	32.7	503.886
32.9	2190.45	32.8	504.296
33	2192.89	32.9	504.702
33.1	2195.31	33	505.121
33.2	2197.67	33.1	505.529
33.3	2199.89	33.2	505.91
33.4	2202.14	33.3	506.284
33.5	2204.34	33.4	506.667
33.6	2206.5	33.5	507.069
33.7	2208.69	33.6	507.469
33.8	2210.87	33.7	507.87
33.9	2213.01	33.8	508.245
34	2215.03	33.9	508.616
34.1	2217	34	508.983
34.2	2218.93	34.1	509.339
34.3	2220.85	34.2	509.678
34.4	2222.77	34.3	510.049
34.5	2224.71	34.4	510.394
34.6	2226.62	34.5	510.757
34.7	2228.45	34.6	511.089
34.8	2230.35	34.7	511.437
34.9	2232.16	34.8	511.791
35	2233.94	34.9	512.151
35.1	2235.71	35	512.495
35.2	2237.48	35.1	512.843
35.3	2239.26	35.2	513.182
35.4	2240.93	35.3	513.542
35.5	2242.57	35.4	513.898
35.6	2244.24	35.5	514.273
35.7	2245.9	35.6	514.652
35.8	2247.5	35.7	514.998
35.9	2249.06	35.8	515.323
36	2250.57	35.9	515.655
36.1	2252.13	36	515.969
36.2	2253.64	36.1	516.299
36.3	2255.15	36.2	516.632
36.4	2256.6	36.3	516.957
36.5	2258.07	36.4	517.302
36.6	2259.53	36.5	517.609
36.7	2260.93	36.6	517.905
36.8	2262.29	36.7	518.214
36.9	2263.64	36.8	518.546
37	2264.98	36.9	518.855
37.1	2266.31	37	519.186
37.2	2267.64	37.1	519.516
37.3	2268.99	37.2	519.819
37.4	2270.31	37.3	520.117
37.5	2271.63	37.4	520.416
37.6	2272.94	37.5	520.719
37.7	2274.22	37.6	521.034
37.8	2275.43	37.7	521.346
37.9	2276.66	37.8	521.663
38	2277.85	37.9	521.965
38.1	2279.02	38	522.284
38.2	2280.23	38.1	522.569
38.3	2281.39	38.2	522.859
38.4	2282.54	38.3	523.178
38.5	2283.7	38.4	523.491
38.6	2284.86	38.5	523.792
38.7	2286.04	38.6	524.07
38.8	2287.17	38.7	524.355
38.9	2288.33	38.8	524.639
39	2289.45	38.9	524.898
39.1	2290.52	39	525.175
39.2	2291.6	39.1	525.445
39.3	2292.71	39.2	525.729
39.4	2293.81	39.3	526.012
39.5	2294.84	39.4	526.287
39.6	2295.86	39.5	526.538
39.7	2296.89	39.6	526.805
39.8	2297.9	39.7	527.086
39.9	2298.92	39.8	527.358
40	2299.92	39.9	527.613
40.1	2300.91	40	527.933
40.2	2301.89	40.1	528.202
40.3	2302.85	40.2	528.472
40.4	2303.83	40.3	528.727
40.5	2304.82	40.4	528.964
40.6	2305.75	40.5	529.217
40.7	2306.69	40.6	529.472
40.8	2307.63	40.7	529.73
40.9	2308.56	40.8	529.938
41	2309.5	40.9	530.159
41.1	2310.43	41	530.292
41.2	2311.32	41.1	530.605
41.3	2312.24	41.2	530.921
41.4	2313.14	41.3	531.305
41.5	2314.01	41.4	531.518
41.6	2314.9	41.5	531.648
41.7	2315.78	41.6	531.843
41.8	2316.66	41.7	532.135
41.9	2317.54	41.8	532.382
42	2318.37	41.9	532.633
42.1	2319.22	42	532.909
42.2	2320.08	42.1	533.198
42.3	2320.93	42.2	533.47
42.4	2321.77	42.3	533.734
42.5	2322.61	42.4	533.967
42.6	2323.44	42.5	534.215
42.7	2324.28	42.6	534.472
42.8	2325.1	42.7	534.73
42.9	2325.93	42.8	534.98
43	2326.77	42.9	535.218
43.1	2327.52	43	535.481
43.2	2328.28	43.1	535.73
43.3	2329.06	43.2	535.955
43.4	2329.83	43.3	536.191
43.5	2330.59	43.4	536.445
43.6	2331.32	43.5	536.698
43.7	2332.06	43.6	536.941
43.8	2332.81	43.7	537.176
43.9	2333.57	43.8	537.424
44	2334.3	43.9	537.672
44.1	2335.03	44	537.926
44.2	2335.77	44.1	538.155
44.3	2336.48	44.2	538.426
44.4	2337.2	44.3	538.627
44.5	2337.9	44.4	538.855
44.6	2338.62	44.5	539.074
44.7	2339.36	44.6	539.32
44.8	2340.09	44.7	539.542
44.9	2340.79	44.8	539.766
45	2341.5	44.9	539.984
45.1	2342.24	45	540.209
45.2	2342.95	45.1	540.426
45.3	2343.65	45.2	540.632
45.4	2344.31	45.3	540.859
45.5	2344.97	45.4	541.089
45.6	2345.59	45.5	541.309
45.7	2346.19	45.6	541.557
45.8	2346.85	45.7	541.785
45.9	2347.52	45.8	541.999
46	2348.19	45.9	542.23
46.1	2348.82	46	542.465
46.2	2349.46	46.1	542.687
46.3	2350.16	46.2	542.917
46.4	2350.81	46.3	543.145
46.5	2351.43	46.4	543.37
46.6	2352.07	46.5	543.586
46.7	2352.7	46.6	543.804
46.8	2353.37	46.7	544.011
46.9	2354.02	46.8	544.218
47	2354.67	46.9	544.445
47.1	2355.33	47	544.676
47.2	2355.93	47.1	544.877
47.3	2356.57	47.2	545.086
47.4	2357.2	47.3	545.292
47.5	2357.84	47.4	545.504
47.6	2358.4	47.5	545.722
47.7	2359	47.6	545.924
47.8	2359.56	47.7	546.125
47.9	2360.1	47.8	546.324
48	2360.68	47.9	546.53
48.1	2361.25	48	546.746
48.2	2361.82	48.1	546.944
48.3	2362.41	48.2	547.18
48.4	2362.98	48.3	547.397
48.5	2363.55	48.4	547.609
48.6	2364.14	48.5	547.824
48.7	2364.73	48.6	548.016
48.8	2365.3	48.7	548.205
48.9	2365.9	48.8	548.426
49	2366.44	48.9	548.612
49.1	2367	49	548.769
49.2	2367.56	49.1	548.945
49.3	2368.12	49.2	549.127
49.4	2368.68	49.3	549.293
49.5	2369.24	49.4	549.48
49.6	2369.77	49.5	549.676
49.7	2370.28	49.6	549.875
49.8	2370.79	49.7	550.089
49.9	2371.32	49.8	550.273
50	2371.86	49.9	550.487
50.1	2372.4	50	550.71
50.2	2372.91	50.1	550.922
50.3	2373.41	50.2	551.12
50.4	2373.92	50.3	551.288
50.5	2374.41	50.4	551.497
50.6	2374.93	50.5	551.679
50.7	2375.45	50.6	551.855
50.8	2375.95	50.7	552.07
50.9	2376.47	50.8	552.261
51	2376.98	50.9	552.434
51.1	2377.49	51	552.605
51.2	2377.99	51.1	552.772
51.3	2378.51	51.2	552.97
51.4	2379.04	51.3	553.124
51.5	2379.57	51.4	553.269
51.6	2380.07	51.5	553.465
51.7	2380.59	51.6	553.573
51.8	2381.11	51.7	553.773
51.9	2381.59	51.8	553.973
52	2382.08	51.9	554.145
52.1	2382.57	52	554.37
52.2	2383.05	52.1	554.55
52.3	2383.54	52.2	554.727
52.4	2384.01	52.3	554.924
52.5	2384.47	52.4	555.113
52.6	2384.92	52.5	555.312
52.7	2385.38	52.6	555.477
52.8	2385.82	52.7	555.648
52.9	2386.31	52.8	555.852
53	2386.79	52.9	556.058
53.1	2387.27	53	556.262
53.2	2387.73	53.1	556.405
53.3	2388.2	53.2	556.586
53.4	2388.67	53.3	556.718
53.5	2389.13	53.4	556.859
53.6	2389.6	53.5	556.968
53.7	2390.09	53.6	557.203
53.8	2390.53	53.7	557.594
53.9	2391	53.8	557.863
54	2391.48	53.9	557.952
54.1	2391.91	54	558.082
54.2	2392.37	54.1	558.247
54.3	2392.84	54.2	558.416
54.4	2393.28	54.3	558.605
54.5	2393.73	54.4	558.773
54.6	2394.18	54.5	558.955
54.7	2394.63	54.6	559.141
54.8	2395.11	54.7	559.344
54.9	2395.55	54.8	559.519
55	2396	54.9	559.707
55.1	2396.44	55	559.877
55.2	2396.9	55.1	560.043
55.3	2397.33	55.2	560.223
55.4	2397.76	55.3	560.383
55.5	2398.23	55.4	560.537
55.6	2398.67	55.5	560.676
55.7	2399.1	55.6	560.839
55.8	2399.56	55.7	561.023
55.9	2400.02	55.8	561.148
56	2400.41	55.9	561.313
56.1	2400.77	56	561.46
56.2	2401.02	56.1	561.589
56.3	2401.43	56.2	561.754
56.4	2401.89	56.3	561.925
56.5	2402.3	56.4	562.098
56.6	2402.7	56.5	562.293
56.7	2403.07	56.6	562.463
56.8	2403.49	56.7	562.625
56.9	2403.89	56.8	562.766
57	2404.27	56.9	562.941
57.1	2404.65	57	563.113
57.2	2405.02	57.1	563.284
57.3	2405.41	57.2	563.416
57.4	2405.79	57.3	563.551
57.5	2406.17	57.4	563.695
57.6	2406.55	57.5	563.855
57.7	2406.95	57.6	563.987
57.8	2407.35	57.7	564.148
57.9	2407.75	57.8	564.254
58	2408.13	57.9	564.395
58.1	2408.51	58	564.545
58.2	2408.89	58.1	564.664
58.3	2409.29	58.2	564.793
58.4	2409.66	58.3	564.961
58.5	2410.04	58.4	565.144
58.6	2410.41	58.5	565.309
58.7	2410.77	58.6	565.476
58.8	2411.14	58.7	565.616
58.9	2411.53	58.8	565.809
59	2411.87	58.9	565.989
59.1	2412.24	59	566.162
59.2	2412.6	59.1	566.34
59.3	2412.97	59.2	566.512
59.4	2413.35	59.3	566.687
59.5	2413.71	59.4	566.868
59.6	2414.09	59.5	567.007
59.7	2414.47	59.6	567.191
59.8	2414.85	59.7	567.386
59.9	2415.21	59.8	567.543
60	2415.59	59.9	567.718
60.1	2415.96	60	567.888
60.2	2416.3	60.1	568.045
60.3	2416.66	60.2	568.203
60.4	2417.02	60.3	568.352
60.5	2417.38	60.4	568.507
60.6	2417.71	60.5	568.645
60.7	2418.07	60.6	568.805
60.8	2418.41	60.7	568.948
60.9	2418.76	60.8	569.094
61	2419.1	60.9	569.254
61.1	2419.45	61	569.373
61.2	2419.81	61.1	569.523
61.3	2420.17	61.2	569.652
61.4	2420.54	61.3	569.796
61.5	2420.9	61.4	569.945
61.6	2421.25	61.5	570.109
61.7	2421.59	61.6	570.281
61.8	2421.93	61.7	570.409
61.9	2422.27	61.8	570.523
62	2422.61	61.9	570.687
62.1	2422.97	62	570.868
62.2	2423.29	62.1	571.045
62.3	2423.63	62.2	571.191
62.4	2423.95	62.3	571.332
62.5	2424.29	62.4	571.504
62.6	2424.61	62.5	571.667
62.7	2424.95	62.6	571.816
62.8	2425.28	62.7	571.973
62.9	2425.6	62.8	572.16
63	2425.95	62.9	572.324
63.1	2426.29	63	572.48
63.2	2426.6	63.1	572.636
63.3	2426.94	63.2	572.781
63.4	2427.28	63.3	572.934
63.5	2427.61	63.4	573.086
63.6	2427.9	63.5	573.218
63.7	2428.24	63.6	573.366
63.8	2428.54	63.7	573.516
63.9	2428.85	63.8	573.664
64	2429.16	63.9	573.808
64.1	2429.46	64	573.937
64.2	2429.79	64.1	574.082
64.3	2430.08	64.2	574.218
64.4	2430.42	64.3	574.388
64.5	2430.76	64.4	574.526
64.6	2431.1	64.5	574.669
64.7	2431.46	64.6	574.803
64.8	2431.78	64.7	574.946
64.9	2432.13	64.8	575.089
65	2432.46	64.9	575.245
65.1	2432.78	65	575.383
65.2	2433.11	65.1	575.476
65.3	2433.45	65.2	575.602
65.4	2433.75	65.3	575.742
65.5	2434.06	65.4	575.866
65.6	2434.35	65.5	576
65.7	2434.66	65.6	576.157
65.8	2434.97	65.7	576.308
65.9	2435.27	65.8	576.448
66	2435.54	65.9	576.594
66.1	2435.83	66	576.769
66.2	2436.13	66.1	576.902
66.3	2436.38	66.2	577.051
66.4	2436.69	66.3	577.211
66.5	2437.01	66.4	577.359
66.6	2437.31	66.5	577.487
66.7	2437.63	66.6	577.618
66.8	2437.93	66.7	577.745
66.9	2438.22	66.8	577.871
67	2438.52	66.9	578.016
67.1	2438.82	67	578.133
67.2	2439.09	67.1	578.28
67.3	2439.36	67.2	578.391
67.4	2439.66	67.3	578.57
67.5	2439.93	67.4	578.75
67.6	2440.23	67.5	578.914
67.7	2440.5	67.6	579.058
67.8	2440.8	67.7	579.234
67.9	2441.07	67.8	579.402
68	2441.36	67.9	579.559
68.1	2441.66	68	579.698
68.2	2441.99	68.1	579.847
68.3	2442.31	68.2	579.97
68.4	2442.61	68.3	580.089
68.5	2442.91	68.4	580.218
68.6	2443.2	68.5	580.352
68.7	2443.49	68.6	580.495
68.8	2443.79	68.7	580.609
68.9	2444.07	68.8	580.754
69	2444.38	68.9	580.922
69.1	2444.66	69	581.077
69.2	2444.94	69.1	581.262
69.3	2445.22	69.2	581.468
69.4	2445.5	69.3	581.638
69.5	2445.79	69.4	581.659
69.6	2446.07	69.5	581.754
69.7	2446.37	69.6	581.827
69.8	2446.66	69.7	581.852
69.9	2446.95	69.8	581.976
70	2447.22	69.9	582.133
70.1	2447.49	70	582.305
70.2	2447.74	70.1	582.456
70.3	2448.03	70.2	582.636
70.4	2448.29	70.3	582.813
70.5	2448.58	70.4	582.997
70.6	2448.87	70.5	583.097
70.7	2449.15	70.6	583.211
70.8	2449.44	70.7	583.383
70.9	2449.72	70.8	583.534
71	2449.99	70.9	583.626
71.1	2450.27	71	583.757
71.2	2450.55	71.1	583.863
71.3	2450.81	71.2	583.987
71.4	2451.06	71.3	584.116
71.5	2451.31	71.4	584.235
71.6	2451.56	71.5	584.378
71.7	2451.83	71.6	584.476
71.8	2452.08	71.7	584.626
71.9	2452.33	71.8	584.734
72	2452.61	71.9	584.878
72.1	2452.87	72	585.023
72.2	2453.14	72.1	585.136
72.3	2453.41	72.2	585.242
72.4	2453.69	72.3	585.363
72.5	2453.94	72.4	585.468
72.6	2454.22	72.5	585.57
72.7	2454.49	72.6	585.684
72.8	2454.77	72.7	585.788
72.9	2455.02	72.8	585.91
73	2455.25	72.9	585.992
73.1	2455.5	73	586.102
73.2	2455.76	73.1	586.277
73.3	2456.01	73.2	586.437
73.4	2456.28	73.3	586.548
73.5	2456.57	73.4	586.691
73.6	2456.79	73.5	586.839
73.7	2457.04	73.6	586.953
73.8	2457.29	73.7	587.094
73.9	2457.54	73.8	587.21
74	2457.8	73.9	587.327
74.1	2458.05	74	587.422
74.2	2458.3	74.1	587.527
74.3	2458.57	74.2	587.626
74.4	2458.79	74.3	587.749
74.5	2459.03	74.4	587.863
74.6	2459.27	74.5	587.999
74.7	2459.47	74.6	588.148
74.8	2459.72	74.7	588.286
74.9	2459.96	74.8	588.395
75	2460.2	74.9	588.527
75.1	2460.43	75	588.641
75.2	2460.65	75.1	588.796
75.3	2460.89	75.2	588.927
75.4	2461.11	75.3	589.058
75.5	2461.33	75.4	589.203
75.6	2461.6	75.5	589.339
75.7	2461.82	75.6	589.437
75.8	2462.08	75.7	589.536
75.9	2462.3	75.8	589.652
76	2462.54	75.9	589.773
76.1	2462.75	76	589.898
76.2	2462.99	76.1	590.012
76.3	2463.23	76.2	590.105
76.4	2463.46	76.3	590.179
76.5	2463.7	76.4	590.293
76.6	2463.92	76.5	590.414
76.7	2464.18	76.6	590.53
76.8	2464.43	76.7	590.655
76.9	2464.66	76.8	590.766
77	2464.92	76.9	590.87
77.1	2465.14	77	590.968
77.2	2465.36	77.1	591.09
77.3	2465.61	77.2	591.195
77.4	2465.88	77.3	591.305
77.5	2466.12	77.4	591.409
77.6	2466.37	77.5	591.531
77.7	2466.61	77.6	591.602
77.8	2466.86	77.7	591.718
77.9	2467.09	77.8	591.891
78	2467.34	77.9	592.027
78.1	2467.59	78	592.191
78.2	2467.83	78.1	592.324
78.3	2468.1	78.2	592.473
78.4	2468.29	78.3	592.612
78.5	2468.52	78.4	592.747
78.6	2468.74	78.5	592.866
78.7	2468.99	78.6	592.98
78.8	2469.21	78.7	593.145
78.9	2469.46	78.8	593.211
79	2469.7	78.9	593.32
79.1	2469.93	79	593.422
79.2	2470.17	79.1	593.527
79.3	2470.42	79.2	593.609
79.4	2470.63	79.3	593.73
79.5	2470.87	79.4	593.866
79.6	2471.08	79.5	594
79.7	2471.28	79.6	594.102
79.8	2471.48	79.7	594.237
79.9	2471.68	79.8	594.376
80	2471.89	79.9	594.507
80.1	2472.11	80	594.628
80.2	2472.34	80.1	594.75
80.3	2472.56	80.2	594.859
80.4	2472.78	80.3	594.992
80.5	2472.98	80.4	595.109
80.6	2473.16	80.5	595.191
80.7	2473.38	80.6	595.308
80.8	2473.63	80.7	595.407
80.9	2473.88	80.8	595.523
81	2474.12	80.9	595.625
81.1	2474.35	81	595.737
81.2	2474.63	81.1	595.878
81.3	2474.69	81.2	596
81.4	2474.88	81.3	596.128
81.5	2475.08	81.4	596.216
81.6	2475.28	81.5	596.383
81.7	2475.53	81.6	596.519
81.8	2475.79	81.7	596.636
81.9	2476.02	81.8	596.77
82	2476.24	81.9	596.907
82.1	2476.46	82	597.041
82.2	2476.68	82.1	597.138
82.3	2476.91	82.2	597.242
82.4	2477.12	82.3	597.339
82.5	2477.32	82.4	597.461
82.6	2477.54	82.5	597.563
82.7	2477.73	82.6	597.684
82.8	2477.93	82.7	597.788
82.9	2478.12	82.8	597.895
83	2478.31	82.9	598.012
83.1	2478.53	83	598.113
83.2	2478.74	83.1	598.233
83.3	2478.94	83.2	598.34
83.4	2479.16	83.3	598.449
83.5	2479.36	83.4	598.563
83.6	2479.54	83.5	598.667
83.7	2479.73	83.6	598.781
83.8	2479.94	83.7	598.902
83.9	2480.14	83.8	599.019
84	2480.37	83.9	599.118
84.1	2480.58	84	599.223
84.2	2480.78	84.1	599.342
84.3	2480.98	84.2	599.469
84.4	2481.2	84.3	599.59
84.5	2481.39	84.4	599.711
84.6	2481.61	84.5	599.84
84.7	2481.83	84.6	599.961
84.8	2482.05	84.7	600.082
84.9	2482.27	84.8	600.187
85	2482.5	84.9	600.308
85.1	2482.72	85	600.43
85.2	2482.93	85.1	600.531
85.3	2483.18	85.2	600.648
85.4	2483.41	85.3	600.735
85.5	2483.6	85.4	600.871
85.6	2483.82	85.5	600.991
85.7	2484.05	85.6	601.106
85.8	2484.27	85.7	601.234
85.9	2484.48	85.8	601.352
86	2484.66	85.9	601.468
86.1	2484.85	86	601.577
86.2	2485.03	86.1	601.696
86.3	2485.24	86.2	601.83
86.4	2485.4	86.3	601.958
86.5	2485.61	86.4	602.085
86.6	2485.81	86.5	602.187
86.7	2485.98	86.6	602.309
86.8	2486.17	86.7	602.407
86.9	2486.39	86.8	602.484
87	2486.57	86.9	602.561
87.1	2486.79	87	602.66
87.2	2486.98	87.1	602.781
87.3	2487.2	87.2	602.859
87.4	2487.44	87.3	602.941
87.5	2487.64	87.4	603.027
87.6	2487.86	87.5	603.121
87.7	2488.05	87.6	603.237
87.8	2488.27	87.7	603.34
87.9	2488.47	87.8	603.454
88	2488.68	87.9	603.558
88.1	2488.89	88	603.667
88.2	2489.08	88.1	603.75
88.3	2489.28	88.2	603.832
88.4	2489.47	88.3	603.941
88.5	2489.66	88.4	604.023
88.6	2489.86	88.5	604.133
88.7	2490.04	88.6	604.223
88.8	2490.23	88.7	604.323
88.9	2490.42	88.8	604.415
89	2490.59	88.9	604.527
89.1	2490.78	89	604.641
89.2	2490.95	89.1	604.737
89.3	2491.13	89.2	604.84
89.4	2491.32	89.3	604.949
89.5	2491.5	89.4	605.059
89.6	2491.66	89.5	605.175
89.7	2491.82	89.6	605.262
89.8	2492	89.7	605.363
89.9	2492.17	89.8	605.484
90	2492.36	89.9	605.577
90.1	2492.53	90	605.672
90.2	2492.72	90.1	605.773
90.3	2492.91	90.2	605.878
90.4	2493.11	90.3	605.968
90.5	2493.28	90.4	606.051
90.6	2493.45	90.5	606.152
90.7	2493.63	90.6	606.242
90.8	2493.82	90.7	606.371
90.9	2494	90.8	606.48
91	2494.18	90.9	606.563
91.1	2494.37	91	606.662
91.2	2494.58	91.1	606.766
91.3	2494.74	91.2	606.852
91.4	2494.92	91.3	606.976
91.5	2495.11	91.4	607.09
91.6	2495.3	91.5	607.223
91.7	2495.49	91.6	607.355
91.8	2495.69	91.7	607.505
91.9	2495.86	91.8	607.621
92	2496.05	91.9	607.765
92.1	2496.24	92	607.888
92.2	2496.42	92.1	608.007
92.3	2496.6	92.2	608.172
92.4	2496.79	92.3	608.281
92.5	2496.97	92.4	608.402
92.6	2497.14	92.5	608.546
92.7	2497.33	92.6	608.655
92.8	2497.51	92.7	608.747
92.9	2497.68	92.8	608.832
93	2497.87	92.9	608.934
93.1	2498.05	93	609.022
93.2	2498.26	93.1	609.106
93.3	2498.44	93.2	609.218
93.4	2498.6	93.3	609.313
93.5	2498.79	93.4	609.402
93.6	2498.96	93.5	609.512
93.7	2499.14	93.6	609.594
93.8	2499.3	93.7	609.706
93.9	2499.47	93.8	609.813
94	2499.68	93.9	609.922
94.1	2499.87	94	609.995
94.2	2500.01	94.1	610.121
94.3	2500.16	94.2	610.25
94.4	2500.35	94.3	610.34
94.5	2500.54	94.4	610.434
94.6	2500.71	94.5	610.551
94.7	2500.89	94.6	610.633
94.8	2501.09	94.7	610.754
94.9	2501.27	94.8	610.839
95	2501.43	94.9	610.941
95.1	2501.59	95	611.027
95.2	2501.79	95.1	611.152
95.3	2501.97	95.2	611.218
95.4	2502.15	95.3	611.286
95.5	2502.32	95.4	611.366
95.6	2502.52	95.5	611.453
95.7	2502.7	95.6	611.512
95.8	2502.88	95.7	611.609
95.9	2503.04	95.8	611.691
96	2503.26	95.9	611.793
96.1	2503.44	96	611.871
96.2	2503.64	96.1	611.953
96.3	2503.8	96.2	612.041
96.4	2503.86	96.3	612.141
96.5	2503.97	96.4	612.25
96.6	2504.07	96.5	612.371
96.7	2504.2	96.6	612.473
96.8	2504.39	96.7	612.57
96.9	2504.6	96.8	612.652
97	2504.77	96.9	612.737
97.1	2504.94	97	612.825
97.2	2505.11	97.1	612.937
97.3	2505.26	97.2	613.031
97.4	2505.41	97.3	613.121
97.5	2505.58	97.4	613.226
97.6	2505.73	97.5	613.301
97.7	2505.92	97.6	613.402
97.8	2506.1	97.7	613.484
97.9	2506.27	97.8	613.609
98	2506.43	97.9	613.699
98.1	2506.59	98	613.805
98.2	2506.76	98.1	613.912
98.3	2506.94	98.2	613.98
98.4	2507.1	98.3	614.087
98.5	2507.27	98.4	614.187
98.6	2507.44	98.5	614.27
98.7	2507.58	98.6	614.376
98.8	2507.74	98.7	614.471
98.9	2507.89	98.8	614.59
99	2508.04	98.9	614.652
99.1	2508.2	99	614.742
99.2	2508.36	99.1	614.823
99.3	2508.52	99.2	614.91
99.4	2508.69	99.3	615
99.5	2508.85	99.4	615.09
99.6	2509.01	99.5	615.196
99.7	2509.16	99.6	615.291
99.8	2509.34	99.7	615.364
99.9	2509.51	99.8	615.453
100	2509.68	99.9	615.534
100.1	2509.86	100	615.621
100.2	2510.04	100.1	615.711
100.3	2510.21	100.2	615.813
100.4	2510.36	100.3	615.917
100.5	2510.52	100.4	616
100.6	2510.7	100.5	616.102
100.7	2510.85	100.6	616.172
100.8	2511.02	100.7	616.257
100.9	2511.18	100.8	616.371
101	2511.33	100.9	616.473
101.1	2511.48	101	616.554
101.2	2511.64	101.1	616.653
101.3	2511.79	101.2	616.73
101.4	2511.95	101.3	616.835
101.5	2512.1	101.4	616.922
101.6	2512.26	101.5	617
101.7	2512.39	101.6	617.102
101.8	2512.53	101.7	617.211
101.9	2512.68	101.8	617.324
102	2512.84	101.9	617.425
102.1	2513.01	102	617.5
102.2	2513.16	102.1	617.616
102.3	2513.34	102.2	617.704
102.4	2513.51	102.3	617.813
102.5	2513.69	102.4	617.93
102.6	2513.86	102.5	618.063
102.7	2514.03	102.6	618.164
102.8	2514.23	102.7	618.265
102.9	2514.39	102.8	618.366
103	2514.56	102.9	618.48
103.1	2514.73	103	618.57
103.2	2514.89	103.1	618.684
103.3	2515.05	103.2	618.777
103.4	2515.2	103.3	618.891
103.5	2515.34	103.4	618.969
103.6	2515.47	103.5	619.07
103.7	2515.59	103.6	619.141
103.8	2515.73	103.7	619.223
103.9	2515.87	103.8	619.316
104	2516.04	103.9	619.415
104.1	2516.18	104	619.495
104.2	2516.34	104.1	619.582
104.3	2516.49	104.2	619.691
104.4	2516.63	104.3	619.793
104.5	2516.76	104.4	619.898
104.6	2516.91	104.5	619.98
104.7	2517.08	104.6	620.073
104.8	2517.23	104.7	620.16
104.9	2517.39	104.8	620.274
105	2517.55	104.9	620.366
105.1	2517.69	105	620.441
105.2	2517.83	105.1	620.551
105.3	2517.97	105.2	620.641
105.4	2518.12	105.3	620.714
105.5	2518.28	105.4	620.813
105.6	2518.44	105.5	620.891
105.7	2518.59	105.6	620.973
105.8	2518.72	105.7	621.074
105.9	2518.89	105.8	621.172
106	2519.04	105.9	621.245
106.1	2519.18	106	621.335
106.2	2519.34	106.1	621.454
106.3	2519.49	106.2	621.574
106.4	2519.65	106.3	621.664
106.5	2519.79	106.4	621.741
106.6	2519.92	106.5	621.832
106.7	2520.07	106.6	621.927
106.8	2520.21	106.7	622.043
106.9	2520.35	106.8	622.136
107	2520.48	106.9	622.203
107.1	2520.62	107	622.281
107.2	2520.76	107.1	622.352
107.3	2520.91	107.2	622.441
107.4	2521.04	107.3	622.538
107.5	2521.19	107.4	622.652
107.6	2521.32	107.5	622.742
107.7	2521.48	107.6	622.824
107.8	2521.64	107.7	622.863
107.9	2521.8	107.8	622.937
108	2521.95	107.9	623.034
108.1	2522.11	108	623.141
108.2	2522.24	108.1	623.23
108.3	2522.31	108.2	623.32
108.4	2522.46	108.3	623.383
108.5	2522.61	108.4	623.464
108.6	2522.76	108.5	623.555
108.7	2522.9	108.6	623.641
108.8	2523.03	108.7	623.734
108.9	2523.15	108.8	623.835
109	2523.3	108.9	623.934
109.1	2523.46	109	624.031
109.2	2523.62	109.1	624.113
109.3	2523.78	109.2	624.203
109.4	2523.91	109.3	624.291
109.5	2524.06	109.4	624.391
109.6	2524.2	109.5	624.485
109.7	2524.35	109.6	624.582
109.8	2524.48	109.7	624.675
109.9	2524.64	109.8	624.789
110	2524.79	109.9	624.902
110.1	2524.91	110	625.004
110.2	2525.07	110.1	625.085
110.3	2525.22	110.2	625.18
110.4	2525.36	110.3	625.266
110.5	2525.5	110.4	625.347
110.6	2525.65	110.5	625.414
110.7	2525.81	110.6	625.495
110.8	2525.95	110.7	625.582
110.9	2526.09	110.8	625.652
111	2526.23	110.9	625.726
111.1	2526.36	111	625.801
111.2	2526.53	111.1	625.891
111.3	2526.66	111.2	625.973
111.4	2526.79	111.3	626.063
111.5	2526.95	111.4	626.133
111.6	2527.07	111.5	626.226
111.7	2527.2	111.6	626.313
111.8	2527.34	111.7	626.395
111.9	2527.47	111.8	626.491
112	2527.62	111.9	626.575
112.1	2527.78	112	626.652
112.2	2527.94	112.1	626.737
112.3	2528.08	112.2	626.82
112.4	2528.22	112.3	626.883
112.5	2528.34	112.4	626.941
112.6	2528.48	112.5	627.031
112.7	2528.63	112.6	627.113
112.8	2528.77	112.7	627.218
112.9	2528.92	112.8	627.293
113	2529.07	112.9	627.366
113.1	2529.22	113	627.449
113.2	2529.35	113.1	627.539
113.3	2529.47	113.2	627.641
113.4	2529.6	113.3	627.716
113.5	2529.72	113.4	627.803
113.6	2529.86	113.5	627.879
113.7	2529.98	113.6	627.922
113.8	2530.11	113.7	627.985
113.9	2530.24	113.8	628.046
114	2530.38	113.9	628.141
114.1	2530.53	114	628.184
114.2	2530.66	114.1	628.273
114.3	2530.81	114.2	628.347
114.4	2530.96	114.3	628.422
114.5	2531.09	114.4	628.5
114.6	2531.25	114.5	628.585
114.7	2531.4	114.6	628.672
114.8	2531.54	114.7	628.766
114.9	2531.68	114.8	628.855
115	2531.83	114.9	628.966
115.1	2531.96	115	629.066
115.2	2532.09	115.1	629.187
115.3	2532.22	115.2	629.274
115.4	2532.36	115.3	629.374
115.5	2532.48	115.4	629.466
115.6	2532.63	115.5	629.551
115.7	2532.73	115.6	629.628
115.8	2532.85	115.7	629.711
115.9	2532.97	115.8	629.796
116	2533.09	115.9	629.895
116.1	2533.22	116	629.98
116.2	2533.35	116.1	630.066
116.3	2533.48	116.2	630.141
116.4	2533.61	116.3	630.214
116.5	2533.74	116.4	630.325
116.6	2533.87	116.5	630.391
116.7	2534	116.6	630.469
116.8	2534.14	116.7	630.577
116.9	2534.26	116.8	630.66
117	2534.41	116.9	630.735
117.1	2534.56	117	630.823
117.2	2534.7	117.1	630.884
117.3	2534.82	117.2	630.956
117.4	2534.95	117.3	631.039
117.5	2535.1	117.4	631.114
117.6	2535.25	117.5	631.172
117.7	2535.38	117.6	631.257
117.8	2535.51	117.7	631.332
117.9	2535.65	117.8	631.386
118	2535.79	117.9	631.461
118.1	2535.9	118	631.551
118.2	2536.03	118.1	631.621
118.3	2536.14	118.2	631.672
118.4	2536.27	118.3	631.745
118.5	2536.4	118.4	631.813
118.6	2536.51	118.5	631.917
118.7	2536.6	118.6	631.992
118.8	2536.73	118.7	632.075
118.9	2536.84	118.8	632.162
119	2536.98	118.9	632.255
119.1	2537.1	119	632.352
119.2	2537.21	119.1	632.417
119.3	2537.34	119.2	632.505
119.4	2537.51	119.3	632.585
119.5	2537.64	119.4	632.66
119.6	2537.77	119.5	632.742
119.7	2537.92	119.6	632.827
119.8	2538.07	119.7	632.927
119.9	2538.2	119.8	633.007
120	2538.33	119.9	633.09
120.1	2538.47	120	633.155
120.2	2538.62	120.1	633.223
120.3	2538.75	120.2	633.32
120.4	2538.87	120.3	633.383
120.5	2538.95	120.4	633.492
120.6	2539.09	120.5	633.566
120.7	2539.18	120.6	633.652
120.8	2539.27	120.7	633.723
120.9	2539.38	120.8	633.781
121	2539.49	120.9	633.847
121.1	2539.62	121	633.922
121.2	2539.7	121.1	634.003
121.3	2539.83	121.2	634.09
121.4	2539.99	121.3	634.165
121.5	2540.11	121.4	634.257
121.6	2540.27	121.5	634.32
121.7	2540.4	121.6	634.413
121.8	2540.57	121.7	634.485
121.9	2540.66	121.8	634.566
122	2540.79	121.9	634.66
122.1	2540.93	122	634.766
122.2	2541.05	122.1	634.847
122.3	2541.18	122.2	634.922
122.4	2541.29	122.3	634.992
122.5	2541.4	122.4	635.063
122.6	2541.52	122.5	635.155
122.7	2541.63	122.6	635.247
122.8	2541.74	122.7	635.313
122.9	2541.85	122.8	635.381
123	2541.98	122.9	635.441
123.1	2542.09	123	635.5
123.2	2542.2	123.1	635.567
123.3	2542.31	123.2	635.662
123.4	2542.41	123.3	635.735
123.5	2542.53	123.4	635.813
123.6	2542.65	123.5	635.894
123.7	2542.76	123.6	635.966
123.8	2542.86	123.7	636.027
123.9	2542.96	123.8	636.109
124	2543.07	123.9	636.187
124.1	2543.18	124	636.25
124.2	2543.28	124.1	636.337
124.3	2543.38	124.2	636.386
124.4	2543.47	124.3	636.454
124.5	2543.57	124.4	636.523
124.6	2543.68	124.5	636.597
124.7	2543.77	124.6	636.655
124.8	2543.85	124.7	636.716
124.9	2543.96	124.8	636.793
125	2544.07	124.9	636.855
125.1	2544.16	125	636.907
125.2	2544.25	125.1	636.976
125.3	2544.37	125.2	637.027
125.4	2544.48	125.3	637.095
125.5	2544.57	125.4	637.133
125.6	2544.68	125.5	637.155
125.7	2544.77	125.6	637.18
125.8	2544.89	125.7	637.219
125.9	2545	125.8	637.281
126	2545.09	125.9	637.316
126.1	2545.16	126	637.345
126.2	2545.25	126.1	637.394
126.3	2545.33	126.2	637.434
126.4	2545.41	126.3	637.456
126.5	2545.47	126.4	637.512
126.6	2545.55	126.5	637.559
126.7	2545.6	126.6	637.638
126.8	2545.66	126.7	637.698
126.9	2545.71	126.8	637.75
127	2545.77	126.9	637.777
127.1	2545.84	127	637.825
127.2	2545.91	127.1	637.871
127.3	2545.99	127.2	637.902
127.4	2546.06	127.3	637.941
127.5	2546.11	127.4	638.007
127.6	2546.18	127.5	638.055
127.7	2546.24	127.6	638.097
127.8	2546.31	127.7	638.136
127.9	2546.34	127.8	638.173
128	2546.4	127.9	638.226
128.1	2546.43	128	638.266
128.2	2546.47	128.1	638.284
128.3	2546.53	128.2	638.32
128.4	2546.58	128.3	638.345
128.5	2546.6	128.4	638.386
128.6	2546.64	128.5	638.427
128.7	2546.65	128.6	638.468
128.8	2546.68	128.7	638.495
128.9	2546.73	128.8	638.524
129	2546.77	128.9	638.546
129.1	2546.82	129	638.575
129.2	2546.88	129.1	638.609
129.3	2546.93	129.2	638.655
129.4	2546.97	129.3	638.684
129.5	2547	129.4	638.711
129.6	2547.04	129.5	638.737
129.7	2547.07	129.6	638.77
129.8	2547.11	129.7	638.813
129.9	2547.16	129.8	638.828
130	2547.2	129.9	638.874
130.1	2547.24	130	638.895
130.2	2547.29	130.1	638.925
130.3	2547.33	130.2	638.966
130.4	2547.38	130.3	638.995
130.5	2547.41	130.4	639.036
130.6	2547.45	130.5	639.082
130.7	2547.48	130.6	639.116
130.8	2547.5	130.7	639.144
130.9	2547.53	130.8	639.165
131	2547.54	130.9	639.191
131.1	2547.58	131	639.211
131.2	2547.61	131.1	639.245
131.3	2547.64	131.2	639.286
131.4	2547.66	131.3	639.327
131.5	2547.69	131.4	639.359
131.6	2547.72	131.5	639.41
131.7	2547.75	131.6	639.456
131.8	2547.77	131.7	639.493
131.9	2547.79	131.8	639.534
132	2547.82	131.9	639.555
132.1	2547.84	132	639.585
132.2	2547.88	132.1	639.606
132.3	2547.9	132.2	639.628
132.4	2547.93	132.3	639.657
132.5	2547.95	132.4	639.687
132.6	2547.97	132.5	639.714
132.7	2547.98	132.6	639.743
132.8	2548.01	132.7	639.784
132.9	2548.03	132.8	639.817
133	2548.05	132.9	639.847
133.1	2548.09	133	639.876
133.2	2548.11	133.1	639.905
133.3	2548.15	133.2	639.925
133.4	2548.16	133.3	639.954
133.5	2548.18	133.4	639.98
133.6	2548.2	133.5	640.027
133.7	2548.24	133.6	640.075
133.8	2548.25	133.7	640.097
133.9	2548.27	133.8	640.129
134	2548.31	133.9	640.172
134.1	2548.34	134	640.188
134.2	2548.36	134.1	640.223
134.3	2548.38	134.2	640.25
134.4	2548.41	134.3	640.304
134.5	2548.44	134.4	640.328
134.6	2548.47	134.5	640.356
134.7	2548.49	134.6	640.374
134.8	2548.5	134.7	640.415
134.9	2548.54	134.8	640.445
135	2548.55	134.9	640.488
135.1	2548.59	135	640.516
135.2	2548.61	135.1	640.546
135.3	2548.63	135.2	640.566
135.4	2548.66	135.3	640.59
135.5	2548.69	135.4	640.645
135.6	2548.73	135.5	640.684
135.7	2548.77	135.6	640.711
135.8	2548.81	135.7	640.765
135.9	2548.82	135.8	640.805
136	2548.86	135.9	640.847
136.1	2548.88	136	640.866
136.2	2548.91	136.1	640.903
136.3	2548.93	136.2	640.925
136.4	2548.96	136.3	640.954
136.5	2548.99	136.4	640.995
136.6	2549.02	136.5	641.016
136.7	2549.03	136.6	641.046
136.8	2549.05	136.7	641.087
136.9	2549.08	136.8	641.136
137	2549.11	136.9	641.16
137.1	2549.13	137	641.203
137.2	2549.16	137.1	641.23
137.3	2549.18	137.2	641.254
137.4	2549.2	137.3	641.27
137.5	2549.23	137.4	641.304
137.6	2549.25	137.5	641.348
137.7	2549.28	137.6	641.395
137.8	2549.31	137.7	641.425
137.9	2549.31	137.8	641.469
138	2549.35	137.9	641.536
138.1	2549.37	138	641.573
138.2	2549.4	138.1	641.606
138.3	2549.41	138.2	641.633
138.4	2549.44	138.3	641.655
138.5	2549.46	138.4	641.684
138.6	2549.48	138.5	641.726
138.7	2549.51	138.6	641.75
138.8	2549.55	138.7	641.777
138.9	2549.57	138.8	641.825
139	2549.59	138.9	641.866
139.1	2549.61	139	641.907
139.2	2549.63	139.1	641.93
139.3	2549.65	139.2	641.976
139.4	2549.68	139.3	642.016
139.5	2549.68	139.4	642.038
139.6	2549.72	139.5	642.073
139.7	2549.75	139.6	642.114
139.8	2549.78	139.7	642.175
139.9	2549.8	139.8	642.216
140	2549.84	139.9	642.262
140.1	2549.87	140	642.296
140.2	2549.88	140.1	642.332
140.3	2549.9	140.2	642.352
140.4	2549.93	140.3	642.371
140.5	2549.96	140.4	642.402
140.6	2549.99	140.5	642.437
140.7	2550.02	140.6	642.48
140.8	2550.03	140.7	642.52
140.9	2550.06	140.8	642.543
141	2550.08	140.9	642.566
141.1	2550.1	141	642.575
141.2	2550.12	141.1	642.605
141.3	2550.15	141.2	642.621
141.4	2550.18	141.3	642.645
141.5	2550.21	141.4	642.667
141.6	2550.23	141.5	642.691
141.7	2550.26	141.6	642.726
141.8	2550.29	141.7	642.766
141.9	2550.31	141.8	642.816
142	2550.34	141.9	642.852
142.1	2550.36	142	642.876
142.2	2550.39	142.1	642.917
142.3	2550.4	142.2	642.941
142.4	2550.43	142.3	642.988
142.5	2550.47	142.4	643.034
142.6	2550.49	142.5	643.075
142.7	2550.52	142.6	643.129
142.8	2550.54	142.7	643.175
142.9	2550.56	142.8	643.199
143	2550.58	142.9	643.234
143.1	2550.61	143	643.274
143.2	2550.64	143.1	643.296
143.3	2550.66	143.2	643.345
143.4	2550.68	143.3	643.379
143.5	2550.7	143.4	643.417
143.6	2550.72	143.5	643.446
143.7	2550.76	143.6	643.492
143.8	2550.79	143.7	643.527
143.9	2550.81	143.8	643.559
144	2550.82	143.9	643.602
144.1	2550.84	144	643.644
144.2	2550.86	144.1	643.665
144.3	2550.88	144.2	643.714
144.4	2550.91	144.3	643.747
144.5	2550.93	144.4	643.777
144.6	2550.96	144.5	643.809
144.7	2551	144.6	643.876
144.8	2551.02	144.7	643.898
144.9	2551.04	144.8	643.941
145	2551.06	144.9	643.976
145.1	2551.07	145	644.024
145.2	2551.1	145.1	644.046
145.3	2551.14	145.2	644.09
145.4	2551.15	145.3	644.145
145.5	2551.18	145.4	644.175
145.6	2551.19	145.5	644.199
145.7	2551.22	145.6	644.255
145.8	2551.25	145.7	644.277
145.9	2551.29	145.8	644.328
146	2551.31	145.9	644.374
146.1	2551.33	146	644.403
146.2	2551.37	146.1	644.437
146.3	2551.4	146.2	644.466
146.4	2551.43	146.3	644.52
146.5	2551.46	146.4	644.566
146.6	2551.5	146.5	644.595
146.7	2551.54	146.6	644.636
146.8	2551.59	146.7	644.648
146.9	2551.63	146.8	644.708
147	2551.68	146.9	644.726
147.1	2551.73	147	644.777
147.2	2551.77	147.1	644.813
147.3	2551.81	147.2	644.859
147.4	2551.84	147.3	644.925
147.5	2551.87	147.4	644.985
147.6	2551.91	147.5	645.027
147.7	2551.95	147.6	645.07
147.8	2551.99	147.7	645.138
147.9	2552.03	147.8	645.175
148	2552.07	147.9	645.247
148.1	2552.11	148	645.308
148.2	2552.17	148.1	645.379
148.3	2552.22	148.2	645.422
148.4	2552.26	148.3	645.469
148.5	2552.3	148.4	645.515
148.6	2552.35	148.5	645.555
148.7	2552.38	148.6	645.585
148.8	2552.43	148.7	645.629
148.9	2552.45	148.8	645.696
149	2552.5	148.9	645.757
149.1	2552.54	149	645.777
[truncated: 6,918 more rows]
