# Supplementary material for: Mutational phospho-mimicry reveals a regulatory role for the XRCC4 and XLF C-terminal tails in modulating DNA bridging during classical non-homologous end joining
Source: eLife journal article supplement (doi:10.7554/elife.22900), 2017-05-13
Supplement: supp [file elife-22900-supp-v1.zip › elife_poa_e22900_Figure_8_figure_supplement_1_source_data_3.txt.txt]

Time	X4_WT	Time	X4_1-157	Time	XLF_WT	Time	XLF_1-224	Time	X4-XLF_WT-WT	Time	X4-XLF_1-157-WT	Time	X4-XLF_WT-1-224	Time	X4-XLF_1-157-1-224
s	RU	s	RU	s	RU	s	RU	s	RU	s	RU	s	RU	s	RU
-50.5	4.83984	-50.5	5.48047	-50.6	4.67188	-50.6	4.14532	-50.6	5.57733	-50.6	3.97266	-50.5	4.41718	-50.5	4.66016
-50.4	4.92969	-50.4	5.57031	-50.5	4.58984	-50.5	4.04376	-50.5	5.59686	-50.5	3.94141	-50.4	4.45624	-50.4	4.60938
-50.3	4.92969	-50.3	5.48828	-50.4	4.62891	-50.4	4.03595	-50.4	5.60858	-50.4	3.92188	-50.3	4.45624	-50.3	4.55859
-50.2	4.89844	-50.2	5.5	-50.3	4.64063	-50.3	4.01642	-50.3	5.60858	-50.3	3.90234	-50.2	4.44843	-50.2	4.53906
-50.1	4.89063	-50.1	5.46094	-50.2	4.60938	-50.2	4.0047	-50.2	5.58514	-50.2	3.87109	-50.1	4.44843	-50.1	4.51953
-50	4.86719	-50	5.44141	-50.1	4.57813	-50.1	3.96564	-50.1	5.5578	-50.1	3.82031	-50	4.47577	-50	4.50781
-49.9	4.84766	-49.9	5.42969	-50	4.57031	-50	3.94611	-50	5.51483	-50	3.80078	-49.9	4.46796	-49.9	4.48047
-49.8	4.82031	-49.8	5.41016	-49.9	4.57031	-49.9	3.93439	-49.9	5.47577	-49.9	3.76953	-49.8	4.46796	-49.8	4.46094
-49.7	4.78906	-49.7	5.37891	-49.8	4.57031	-49.8	3.93439	-49.8	5.44843	-49.8	3.74219	-49.7	4.45624	-49.7	4.42969
-49.6	4.76953	-49.6	5.35156	-49.7	4.55859	-49.7	3.92657	-49.7	5.40546	-49.7	3.73047	-49.6	4.44843	-49.6	4.41016
-49.5	4.75	-49.5	5.33203	-49.6	4.55078	-49.6	3.91486	-49.6	5.38593	-49.6	3.71094	-49.5	4.43671	-49.5	4.39063
-49.4	4.71875	-49.4	5.30859	-49.5	4.55078	-49.5	3.89532	-49.5	5.36639	-49.5	3.70313	-49.4	4.43671	-49.4	4.37891
-49.3	4.70703	-49.3	5.28906	-49.4	4.53906	-49.4	3.88751	-49.4	5.35858	-49.4	3.69141	-49.3	4.41718	-49.3	4.34766
-49.2	4.6875	-49.2	5.26172	-49.3	4.51953	-49.3	3.86407	-49.3	5.33514	-49.3	3.67188	-49.2	4.39764	-49.2	4.33984
-49.1	4.66797	-49.1	5.23828	-49.2	4.5	-49.2	3.84454	-49.2	5.31561	-49.2	3.65234	-49.1	4.38593	-49.1	4.32813
-49	4.64844	-49	5.21094	-49.1	4.48047	-49.1	3.83673	-49.1	5.29608	-49.1	3.64063	-49	4.37811	-49	4.32031
-48.9	4.64063	-48.9	5.19922	-49	4.46094	-49	3.82501	-49	5.26483	-49	3.62109	-48.9	4.36639	-48.9	4.30078
-48.8	4.62891	-48.8	5.17188	-48.9	4.44141	-48.9	3.8172	-48.9	5.2453	-48.9	3.61328	-48.8	4.34686	-48.8	4.28906
-48.7	4.60938	-48.7	5.14844	-48.8	4.42969	-48.8	3.8172	-48.8	5.22577	-48.8	3.58984	-48.7	4.32733	-48.7	4.26953
-48.6	4.59766	-48.6	5.12109	-48.7	4.42188	-48.7	3.80548	-48.7	5.20624	-48.7	3.57031	-48.6	4.31561	-48.6	4.25781
-48.5	4.57813	-48.5	5.10938	-48.6	4.39844	-48.6	3.80548	-48.6	5.18671	-48.6	3.55078	-48.5	4.3078	-48.5	4.23828
-48.4	4.55859	-48.4	5.08984	-48.5	4.37891	-48.5	3.79376	-48.5	5.16718	-48.5	3.53125	-48.4	4.28827	-48.4	4.21875
-48.3	4.55078	-48.3	5.08203	-48.4	4.35938	-48.4	3.79376	-48.4	5.13593	-48.4	3.51172	-48.3	4.27655	-48.3	4.19922
-48.2	4.53906	-48.2	5.05078	-48.3	4.33984	-48.3	3.78595	-48.3	5.11639	-48.3	3.49219	-48.2	4.25702	-48.2	4.19141
-48.1	4.51953	-48.1	5.03125	-48.2	4.32031	-48.2	3.77423	-48.2	5.09686	-48.2	3.47266	-48.1	4.2453	-48.1	4.16797
-48	4.50781	-48	5.01172	-48.1	4.30859	-48.1	3.76642	-48.1	5.06561	-48.1	3.45313	-48	4.23749	-48	4.16016
-47.9	4.48047	-47.9	5	-48	4.30078	-48	3.7547	-48	5.04608	-48	3.42969	-47.9	4.21796	-47.9	4.14844
-47.8	4.45703	-47.8	4.98047	-47.9	4.28125	-47.9	3.74689	-47.9	5.02655	-47.9	3.42188	-47.8	4.19843	-47.8	4.12891
-47.7	4.40625	-47.7	4.90469	-47.8	4.32111	-47.8	3.73047	-47.8	4.99139	-47.8	3.38202	-47.7	4.13904	-47.7	4.09686
-47.6	4.32422	-47.6	4.78827	-47.7	4.37421	-47.7	3.68359	-47.7	4.93201	-47.7	3.30859	-47.6	4.07733	-47.6	4.05548
-47.5	4.28046	-47.5	4.76563	-47.6	4.35236	-47.6	3.63751	-47.6	4.90466	-47.6	3.24921	-47.5	4.08905	-47.5	4.03436
-47.4	4.25311	-47.4	4.7547	-47.5	4.33984	-47.5	3.60236	-47.5	4.87891	-47.5	3.22266	-47.4	4.10468	-47.4	4.01953
-47.3	4.21484	-47.3	4.73047	-47.4	4.33594	-47.4	3.59454	-47.4	4.87421	-47.4	3.20624	-47.3	4.06952	-47.3	3.99219
-47.2	4.15704	-47.2	4.71094	-47.3	4.32031	-47.3	3.58984	-47.3	4.87109	-47.3	3.17657	-47.2	4.02655	-47.2	3.97656
-47.1	4.14063	-47.1	4.69452	-47.2	4.26483	-47.2	3.56018	-47.2	4.86951	-47.2	3.16327	-47.1	3.9906	-47.1	3.96564
-47	4.12421	-47	4.6875	-47.1	4.21875	-47.1	3.54688	-47.1	4.87109	-47.1	3.14063	-47	3.96094	-47	3.94452
-46.9	4.11719	-46.9	4.66486	-47	4.17969	-47	3.54846	-47	4.85858	-47	3.12109	-46.9	3.93982	-46.9	3.92969
-46.8	4.10938	-46.8	4.64063	-46.9	4.15625	-46.9	3.53125	-46.9	4.84998	-46.9	3.10236	-46.8	3.92969	-46.8	3.91016
-46.7	4.09766	-46.7	4.62891	-46.8	4.14063	-46.8	3.51251	-46.8	4.83514	-46.8	3.08514	-46.7	3.9328	-46.7	3.90314
-46.6	4.07813	-46.6	4.61719	-46.7	4.09296	-46.7	3.49298	-46.7	4.8125	-46.7	3.06329	-46.6	3.91718	-46.6	3.90234
-46.5	4.07031	-46.5	4.59766	-46.6	4.06641	-46.6	3.48596	-46.6	4.78827	-46.6	3.0625	-46.5	3.90546	-46.5	3.89063
-46.4	4.05078	-46.4	4.57813	-46.5	4.04688	-46.5	3.48517	-46.5	4.76874	-46.5	3.05389	-46.4	3.88593	-46.4	3.88281
-46.3	4.02734	-46.3	4.57031	-46.4	4.01563	-46.4	3.47656	-46.4	4.7406	-46.4	3.03906	-46.3	3.87109	-46.3	3.85938
-46.2	4.01642	-46.2	4.55078	-46.3	4.00079	-46.3	3.47815	-46.3	4.72577	-46.3	3.01953	-46.2	3.86169	-46.2	3.83984
-46.1	3.98749	-46.1	4.53906	-46.2	3.98828	-46.2	3.48047	-46.2	4.70624	-46.2	3.01251	-46.1	3.84686	-46.1	3.83203
-46	3.96875	-46	4.52423	-46.1	3.96875	-46.1	3.45392	-46.1	4.69141	-46.1	3.01172	-46	3.82733	-46	3.8078
-45.9	3.94922	-45.9	4.5	-46	3.94922	-46	3.4422	-46	4.68671	-46	3.0047	-45.9	3.8125	-45.9	3.78204
-45.8	3.92969	-45.8	4.48749	-45.9	3.9375	-45.9	3.42267	-45.9	4.68359	-45.9	2.99219	-45.8	3.8078	-45.8	3.76953
-45.7	3.91797	-45.7	4.47345	-45.8	3.91797	-45.8	3.40314	-45.8	4.67029	-45.8	2.97577	-45.7	3.79138	-45.7	3.75311
-45.6	3.91016	-45.6	4.46094	-45.7	3.90155	-45.7	3.39142	-45.7	4.65546	-45.7	2.98047	-45.6	3.77655	-45.6	3.73828
-45.5	3.89532	-45.5	4.44141	-45.6	3.88672	-45.6	3.37189	-45.6	4.64063	-45.6	2.96094	-45.5	3.76172	-45.5	3.72345
-45.4	3.89374	-45.4	4.42969	-45.5	3.86719	-45.5	3.35236	-45.5	4.6203	-45.5	2.95392	-45.4	3.74921	-45.4	3.71405
-45.3	3.89063	-45.3	4.41016	-45.4	3.84766	-45.4	3.31799	-45.4	4.59686	-45.4	2.93671	-45.3	3.72577	-45.3	3.6922
-45.2	3.87109	-45.2	4.40234	-45.3	3.82813	-45.3	3.30859	-45.3	4.58044	-45.3	2.92657	-45.2	3.70624	-45.2	3.67188
-45.1	3.85938	-45.1	4.38593	-45.2	3.80939	-45.2	3.28204	-45.2	4.56561	-45.2	2.90546	-45.1	3.70154	-45.1	3.65234
-45	3.84766	-45	4.36719	-45.1	3.79688	-45.1	3.27893	-45.1	4.53436	-45.1	2.91016	-45	3.68671	-45	3.62891
-44.9	3.82813	-44.9	4.34766	-45	3.77734	-45	3.2547	-45	4.51483	-45	2.89063	-44.9	3.67499	-44.9	3.61249
-44.8	3.82031	-44.8	4.34454	-44.9	3.75781	-44.9	3.24298	-44.9	4.51172	-44.9	2.87891	-44.8	3.64844	-44.8	3.60938
-44.7	3.80859	-44.7	4.34296	-44.8	3.73828	-44.8	3.22345	-44.8	4.48749	-44.8	2.85938	-44.7	3.64764	-44.7	3.59766
-44.6	3.80859	-44.6	4.32813	-44.7	3.73126	-44.7	3.20392	-44.7	4.48279	-44.7	2.85938	-44.6	3.63593	-44.6	3.57813
-44.5	3.78906	-44.5	4.30859	-44.6	3.71875	-44.6	3.18439	-44.6	4.45624	-44.6	2.83984	-44.5	3.61951	-44.5	3.57111
-44.4	3.78204	-44.4	4.30157	-44.5	3.69922	-44.5	3.16956	-44.5	4.44922	-44.5	2.82031	-44.4	3.61639	-44.4	3.57031
-44.3	3.78906	-44.3	4.30078	-44.4	3.69141	-44.4	3.16486	-44.4	4.44843	-44.4	2.81329	-44.3	3.59296	-44.3	3.55078
-44.2	3.78125	-44.2	4.28436	-44.3	3.66016	-44.3	3.14532	-44.3	4.43201	-44.3	2.8125	-44.2	3.58514	-44.2	3.54376
-44.1	3.76953	-44.1	4.26953	-44.2	3.64063	-44.2	3.12579	-44.2	4.40546	-44.2	2.80078	-44.1	3.57031	-44.1	3.53436
-44	3.75311	-44	4.26251	-44.1	3.62109	-44.1	3.11719	-44.1	4.38593	-44.1	2.78125	-44	3.56561	-44	3.53125
-43.9	3.75	-43.9	4.25	-44	3.60938	-44	3.11407	-44	4.36639	-44	2.77655	-43.9	3.55078	-43.9	3.50781
-43.8	3.73828	-43.8	4.23828	-43.9	3.58984	-43.9	3.09924	-43.9	4.34686	-43.9	2.75781	-43.8	3.53827	-43.8	3.48828
-43.7	3.71875	-43.7	4.23047	-43.8	3.57343	-43.8	3.08984	-43.8	4.32813	-43.8	2.74298	-43.7	3.52185	-43.7	3.47345
-43.6	3.72345	-43.6	4.21405	-43.7	3.57111	-43.7	3.06329	-43.7	4.3078	-43.7	2.74219	-43.6	3.51172	-43.6	3.47266
-43.5	3.71094	-43.5	4.20392	-43.6	3.55859	-43.6	3.05157	-43.6	4.29608	-43.6	2.73047	-43.5	3.50702	-43.5	3.45624
-43.4	3.71094	-43.4	4.19922	-43.5	3.55389	-43.5	3.04846	-43.5	4.27655	-43.5	2.72577	-43.4	3.4906	-43.4	3.44922
-43.3	3.69141	-43.3	4.17267	-43.4	3.52734	-43.4	3.04376	-43.4	4.26172	-43.4	2.70703	-43.3	3.48749	-43.3	3.43439
-43.2	3.69141	-43.2	4.17188	-43.3	3.50781	-43.3	3.02734	-43.3	4.25702	-43.3	2.70392	-43.2	3.46875	-43.2	3.42969
-43.1	3.67969	-43.1	4.15546	-43.2	3.50079	-43.2	3.01721	-43.2	4.23279	-43.2	2.69452	-43.1	3.46796	-43.1	3.41016
-43	3.66718	-43	4.14844	-43.1	3.48828	-43.1	3.0047	-43.1	4.20624	-43.1	2.67969	-43	3.44843	-43	3.39374
-42.9	3.64844	-42.9	4.14063	-43	3.46875	-43	2.99609	-43	4.19373	-43	2.67267	-42.9	3.43671	-42.9	3.38672
-42.8	3.63751	-42.8	4.11719	-42.9	3.44922	-42.9	2.99298	-42.9	4.17499	-42.9	2.66016	-42.8	3.40546	-42.8	3.37891
-42.7	3.62109	-42.7	4.09454	-42.8	3.4328	-42.8	2.97815	-42.8	4.16016	-42.8	2.65234	-42.7	3.39764	-42.7	3.35626
-42.6	3.60156	-42.6	4.07031	-42.7	3.42267	-42.7	2.95392	-42.7	4.14294	-42.7	2.62891	-42.6	3.36951	-42.6	3.33984
-42.5	3.59296	-42.5	4.0625	-42.6	3.41797	-42.6	2.94611	-42.6	4.12109	-42.6	2.62579	-42.5	3.35468	-42.5	3.33514
-42.4	3.58984	-42.4	4.05389	-42.5	3.40155	-42.5	2.93439	-42.5	4.10858	-42.5	2.62109	-42.4	3.33514	-42.4	3.33282
-42.3	3.58282	-42.3	4.03906	-42.4	3.39142	-42.4	2.92578	-42.4	4.09686	-42.4	2.61328	-42.3	3.32031	-42.3	3.33203
-42.2	3.58984	-42.2	4.03906	-42.3	3.37891	-42.3	2.93048	-42.3	4.08984	-42.3	2.60468	-42.2	3.3078	-42.2	3.32031
-42.1	3.58984	-42.1	4.01953	-42.2	3.37189	-42.2	2.92267	-42.2	4.08905	-42.2	2.60156	-42.1	3.29608	-42.1	3.30078
-42	3.58203	-42	4.01251	-42.1	3.37891	-42.1	2.91565	-42.1	4.06952	-42.1	2.58984	-42	3.29138	-42	3.29218
-41.9	3.57343	-41.9	4.01172	-42	3.37109	-42	2.91486	-42	4.06952	-42	2.58203	-41.9	3.28906	-41.9	3.29376
-41.8	3.56641	-41.8	3.99219	-41.9	3.36249	-41.9	2.91956	-41.9	4.0578	-41.9	2.57031	-41.8	3.27655	-41.8	3.28906
-41.7	3.55859	-41.7	3.98358	-41.8	3.35938	-41.8	2.91797	-41.8	4.04138	-41.8	2.55078	-41.7	3.26953	-41.7	3.27423
-41.6	3.54376	-41.6	3.96875	-41.7	3.34766	-41.7	2.91956	-41.7	4.03827	-41.7	2.53906	-41.6	3.25702	-41.6	3.27344
-41.5	3.53906	-41.5	3.95703	-41.6	3.33282	-41.6	2.91486	-41.6	4.02655	-41.6	2.52423	-41.5	3.23749	-41.5	3.26172
-41.4	3.51953	-41.4	3.94922	-41.5	3.33984	-41.5	2.91016	-41.5	4.01483	-41.5	2.51172	-41.4	3.22107	-41.4	3.25
-41.3	3.5047	-41.3	3.92969	-41.4	3.33124	-41.4	2.90784	-41.4	3.9953	-41.4	2.50311	-41.3	3.21405	-41.3	3.24219
-41.2	3.5	-41.2	3.91486	-41.3	3.32111	-41.3	2.89532	-41.3	3.99219	-41.3	2.5	-41.2	3.20624	-41.2	3.24219
-41.1	3.48358	-41.1	3.89844	-41.2	3.32813	-41.2	2.88672	-41.2	3.98749	-41.2	2.48828	-41.1	3.19141	-41.1	3.23047
-41	3.46875	-41	3.87109	-41.1	3.31171	-41.1	2.88831	-41.1	3.97498	-41.1	2.48047	-41	3.18671	-41	3.22577
-40.9	3.44922	-40.9	3.85156	-41	3.29688	-41	2.87579	-41	3.93671	-41	2.46875	-40.9	3.17889	-40.9	3.19922
-40.8	3.42969	-40.8	3.83514	-40.9	3.28986	-40.9	2.86719	-40.9	3.91718	-40.9	2.46875	-40.8	3.15546	-40.8	3.1875
-40.7	3.41797	-40.7	3.81329	-40.8	3.29376	-40.8	2.86487	-40.8	3.91718	-40.8	2.46564	-40.7	3.15546	-40.7	3.16797
-40.6	3.41016	-40.6	3.80389	-40.7	3.29218	-40.7	2.85236	-40.7	3.90546	-40.7	2.46094	-40.6	3.15076	-40.6	3.16486
-40.5	3.39844	-40.5	3.79376	-40.6	3.28906	-40.6	2.85236	-40.6	3.89374	-40.6	2.45313	-40.5	3.13593	-40.5	3.15546
-40.4	3.37891	-40.4	3.77734	-40.5	3.28204	-40.5	2.84454	-40.5	3.89764	-40.5	2.44452	-40.4	3.12421	-40.4	3.15314
-40.3	3.35938	-40.3	3.76953	-40.4	3.28436	-40.4	2.83752	-40.4	3.87421	-40.4	2.42969	-40.3	3.10938	-40.3	3.15234
-40.2	3.34766	-40.2	3.7547	-40.3	3.28204	-40.3	2.82501	-40.3	3.86639	-40.3	2.42969	-40.2	3.09686	-40.2	3.12891
-40.1	3.32813	-40.1	3.74219	-40.2	3.28046	-40.2	2.82111	-40.2	3.84686	-40.2	2.41016	-40.1	3.08984	-40.1	3.12109
-40	3.32813	-40	3.71796	-40.1	3.28204	-40.1	2.82501	-40.1	3.83514	-40.1	2.40314	-40	3.08044	-40	3.11249
-39.9	3.31329	-39.9	3.6875	-40	3.27734	-40	2.81641	-40	3.82733	-40	2.40234	-39.9	3.08203	-39.9	3.09454
-39.8	3.30078	-39.8	3.66797	-39.9	3.26953	-39.9	2.81799	-39.9	3.8078	-39.9	2.39063	-39.8	3.07733	-39.8	3.07031
-39.7	3.28125	-39.7	3.64844	-39.8	3.26563	-39.8	2.81329	-39.8	3.79297	-39.8	2.38593	-39.7	3.0578	-39.7	3.0625
-39.6	3.25702	-39.6	3.64063	-39.7	3.27423	-39.7	2.80548	-39.7	3.76874	-39.7	2.37891	-39.6	3.04138	-39.6	3.03906
-39.5	3.23517	-39.5	3.62109	-39.6	3.26953	-39.6	2.79376	-39.6	3.74921	-39.6	2.37189	-39.5	3.02655	-39.5	3.01953
-39.4	3.22266	-39.4	3.58984	-39.5	3.26953	-39.5	2.77893	-39.5	3.73749	-39.5	2.36639	-39.4	3.01483	-39.4	2.9953
-39.3	3.21405	-39.3	3.57031	-39.4	3.26483	-39.4	2.76642	-39.4	3.72498	-39.4	2.35236	-39.3	2.9953	-39.3	2.96875
-39.2	3.20703	-39.2	3.54608	-39.3	3.25781	-39.3	2.7547	-39.3	3.69141	-39.3	2.35468	-39.2	2.98749	-39.2	2.97421
-39.1	3.20001	-39.1	3.53671	-39.2	3.27344	-39.2	2.76251	-39.2	3.69452	-39.2	2.33282	-39.1	2.96094	-39.1	2.99219
-39	3.21875	-39	3.54218	-39.1	3.29297	-39.1	2.78204	-39.1	3.70154	-39.1	2.33984	-39	2.96405	-39	2.97266
-38.9	3.22656	-38.9	3.51953	-39	3.30939	-39	2.79376	-39	3.6875	-39	2.34454	-38.9	2.96326	-38.9	2.96094
-38.8	3.21875	-38.8	3.51251	-38.9	3.30859	-38.9	2.80157	-38.9	3.67499	-38.9	2.33514	-38.8	2.95233	-38.8	2.94452
-38.7	3.19922	-38.7	3.50781	-38.8	3.30939	-38.8	2.78674	-38.8	3.65546	-38.8	2.33673	-38.7	2.96094	-38.7	2.93439
-38.6	3.18439	-38.6	3.49139	-38.7	3.33124	-38.7	2.78595	-38.7	3.64063	-38.7	2.32343	-38.6	2.96094	-38.6	2.92969
-38.5	3.16327	-38.5	3.48126	-38.6	3.34064	-38.6	2.75781	-38.6	3.63593	-38.6	2.32813	-38.5	2.95154	-38.5	2.92188
-38.4	3.17267	-38.4	3.46094	-38.5	3.35547	-38.5	2.73517	-38.5	3.62891	-38.5	2.34064	-38.4	2.94922	-38.4	2.90625
-38.3	3.1922	-38.3	3.46173	-38.4	3.35938	-38.4	2.70081	-38.4	3.62341	-38.4	2.36407	-38.3	2.97186	-38.3	2.93048
-38.2	3.19922	-38.2	3.46094	-38.3	3.3125	-38.3	2.65158	-38.3	3.57654	-38.3	2.37891	-38.2	2.98358	-38.2	2.93359
-38.1	3.25079	-38.1	3.42108	-38.2	3.24219	-38.2	2.58362	-38.2	3.49921	-38.2	2.37891	-38.1	3.02344	-38.1	2.88983
-38	3.28125	-38	3.36328	-38.1	3.17889	-38.1	2.51096	-38.1	3.4281	-38.1	2.42734	-38	3.05078	-38	2.78827
-37.9	3.07501	-37.9	3.28751	-38	3.1156	-38	2.44141	-38	3.3656	-38	2.48438	-37.9	2.91406	-37.9	2.61093
-37.8	2.78671	-37.8	3.19141	-37.9	3.03906	-37.9	2.36798	-37.9	3.29688	-37.9	2.3125	-37.8	2.67343	-37.8	2.40546
-37.7	2.61954	-37.7	3.08047	-37.8	2.97968	-37.8	2.29297	-37.8	3.22888	-37.8	2.00546	-37.7	2.4617	-37.7	2.29922
-37.6	2.48749	-37.6	2.97656	-37.7	2.89764	-37.7	2.21875	-37.7	3.13824	-37.7	1.79922	-37.6	2.27576	-37.6	2.23517
-37.5	2.43829	-37.5	2.91251	-37.6	2.83984	-37.6	2.14612	-37.6	3.0578	-37.6	1.64844	-37.5	2.20703	-37.5	2.26642
-37.4	2.48907	-37.4	2.90704	-37.5	2.81329	-37.5	2.14142	-37.5	3.05078	-37.5	1.625	-37.4	2.26483	-37.4	2.32422
-37.3	2.54767	-37.3	2.9664	-37.4	2.8125	-37.4	2.16095	-37.4	3.06641	-37.4	1.70392	-37.3	2.36093	-37.3	2.34375
-37.2	2.61017	-37.2	3.03986	-37.3	2.84064	-37.3	2.18829	-37.3	3.09607	-37.3	1.81015	-37.2	2.44843	-37.2	2.38437
-37.1	2.64453	-37.1	3.06641	-37.2	2.86328	-37.2	2.23206	-37.2	3.1297	-37.2	1.89923	-37.1	2.49609	-37.1	2.43048
-37	2.68359	-37	3.10156	-37.1	2.88751	-37.1	2.27502	-37.1	3.1828	-37.1	1.9375	-37	2.53906	-37	2.45703
-36.9	2.71954	-36.9	3.14142	-37	2.90625	-37	2.28986	-37	3.21405	-37	1.95703	-36.9	2.56091	-36.9	2.46875
-36.8	2.73828	-36.8	3.14063	-36.9	2.90625	-36.9	2.29846	-36.9	3.21405	-36.9	1.98438	-36.8	2.55859	-36.8	2.46405
-36.7	2.76251	-36.7	3.12579	-36.8	2.89844	-36.8	2.29376	-36.8	3.21875	-36.8	2.01251	-36.7	2.56561	-36.7	2.46173
-36.6	2.76483	-36.6	3.11719	-36.7	2.88672	-36.7	2.29688	-36.7	3.21405	-36.7	2.03204	-36.6	2.58124	-36.6	2.45703
-36.5	2.77734	-36.5	3.12421	-36.6	2.86719	-36.6	2.29376	-36.6	3.23047	-36.6	2.06641	-36.5	2.60233	-36.5	2.45392
-36.4	2.78671	-36.4	3.125	-36.5	2.85236	-36.5	2.27893	-36.5	3.23749	-36.5	2.08282	-36.4	2.62732	-36.4	2.44922
-36.3	2.80078	-36.3	3.12656	-36.4	2.84296	-36.4	2.27423	-36.4	3.25	-36.4	2.07813	-36.3	2.63672	-36.3	2.44141
-36.2	2.80389	-36.2	3.14063	-36.3	2.82813	-36.3	2.26721	-36.3	3.25702	-36.3	2.08984	-36.2	2.65546	-36.2	2.4375
-36.1	2.80859	-36.1	3.13983	-36.2	2.82111	-36.2	2.26642	-36.2	3.26794	-36.2	2.09454	-36.1	2.66016	-36.1	2.43439
-36	2.81641	-36	3.1539	-36.1	2.81171	-36.1	2.25781	-36.1	3.28906	-36.1	2.08514	-36	2.65466	-36	2.42969
-35.9	2.84064	-35.9	3.17499	-36	2.81329	-36	2.24298	-36	3.30859	-36	2.08673	-35.9	2.63593	-35.9	2.4375
-35.8	2.85547	-35.8	3.16797	-35.9	2.80859	-35.9	2.24768	-35.9	3.31561	-35.9	2.08203	-35.8	2.62341	-35.8	2.45233
-35.7	2.86407	-35.7	3.17578	-35.8	2.79218	-35.8	2.24298	-35.8	3.31952	-35.8	2.07343	-35.7	2.60468	-35.7	2.46954
-35.6	2.87421	-35.6	3.17267	-35.7	2.78986	-35.7	2.25781	-35.7	3.31561	-35.7	2.0672	-35.6	2.59766	-35.6	2.47656
-35.5	2.86407	-35.5	3.16016	-35.6	2.77734	-35.6	2.25861	-35.6	3.31561	-35.6	2.04608	-35.5	2.58514	-35.5	2.48828
-35.4	2.86407	-35.4	3.15155	-35.5	2.76563	-35.5	2.27188	-35.5	3.3125	-35.5	2.03906	-35.4	2.58203	-35.4	2.49298
-35.3	2.86639	-35.3	3.14142	-35.4	2.76251	-35.4	2.28204	-35.4	3.31091	-35.4	2.03595	-35.3	2.57263	-35.3	2.48358
-35.2	2.86407	-35.2	3.13361	-35.3	2.76563	-35.3	2.29376	-35.3	3.30078	-35.3	2.03436	-35.2	2.56561	-35.2	2.48126
-35.1	2.86639	-35.1	3.13593	-35.2	2.76563	-35.2	2.29376	-35.2	3.29999	-35.2	2.03125	-35.1	2.54608	-35.1	2.48517
-35	2.86407	-35	3.13672	-35.1	2.77423	-35.1	2.28906	-35.1	3.28827	-35.1	2.00781	-35	2.53436	-35	2.47577
-34.9	2.84686	-34.9	3.13361	-35	2.76483	-35	2.28674	-35	3.28827	-35	2.0047	-34.9	2.51483	-34.9	2.47345
-34.8	2.82501	-34.8	3.13202	-34.9	2.73828	-34.9	2.27423	-34.9	3.26874	-34.9	2.00781	-34.8	2.51953	-34.8	2.46094
-34.7	2.8125	-34.7	3.11719	-34.8	2.71875	-34.8	2.26563	-34.8	3.26874	-34.8	2.01172	-34.7	2.51483	-34.7	2.44452
-34.6	2.79608	-34.6	3.09454	-34.7	2.71173	-34.7	2.26251	-34.7	3.25232	-34.7	2	-34.6	2.52185	-34.6	2.41797
-34.5	2.77423	-34.5	3.09296	-34.6	2.69452	-34.6	2.26721	-34.6	3.21796	-34.6	1.98047	-34.5	2.51953	-34.5	2.41016
-34.4	2.76483	-34.4	3.08282	-34.5	2.68439	-34.5	2.26721	-34.5	3.20313	-34.5	1.95624	-34.4	2.51483	-34.4	2.40314
-34.3	2.76251	-34.3	3.07031	-34.4	2.66797	-34.4	2.26953	-34.4	3.19843	-34.4	1.9375	-34.3	2.50702	-34.3	2.40234
-34.2	2.76483	-34.2	3.06561	-34.3	2.66327	-34.3	2.26721	-34.3	3.17419	-34.3	1.91797	-34.2	2.4953	-34.2	2.39063
-34.1	2.75	-34.1	3.04376	-34.2	2.65625	-34.2	2.27423	-34.2	3.14764	-34.2	1.91016	-34.1	2.47577	-34.1	2.38593
-34	2.73047	-34	3.03906	-34.1	2.64844	-34.1	2.26642	-34.1	3.15234	-34.1	1.90314	-34	2.45624	-34	2.38361
-33.9	2.71875	-33.9	3.01953	-34	2.63672	-34	2.25781	-34	3.14764	-34	1.89532	-33.9	2.44843	-33.9	2.37891
-33.8	2.69922	-33.8	3.02423	-33.9	2.61719	-33.9	2.2547	-33.9	3.12811	-33.9	1.89374	-33.8	2.43671	-33.8	2.35938
-33.7	2.67969	-33.7	3.02264	-33.8	2.60236	-33.8	2.24768	-33.8	3.12811	-33.8	1.89063	-33.7	2.41718	-33.7	2.35468
-33.6	2.67969	-33.6	3.01953	-33.7	2.60938	-33.7	2.24298	-33.7	3.10858	-33.7	1.87109	-33.6	2.40546	-33.6	2.36407
-33.5	2.66797	-33.5	3.01563	-33.6	2.58984	-33.6	2.23517	-33.6	3.09686	-33.6	1.85156	-33.5	2.38593	-33.5	2.35938
-33.4	2.65314	-33.4	3.01953	-33.5	2.58124	-33.5	2.22345	-33.5	3.09216	-33.5	1.83673	-33.4	2.36639	-33.4	2.35626
-33.3	2.66016	-33.3	3.00781	-33.4	2.59064	-33.4	2.21564	-33.4	3.08514	-33.4	1.83203	-33.3	2.35156	-33.3	2.34375
-33.2	2.64063	-33.2	3.0047	-33.3	2.59296	-33.3	2.20392	-33.3	3.07733	-33.3	1.82343	-33.2	2.33905	-33.2	2.33203
-33.1	2.62891	-33.1	3.00311	-33.2	2.59064	-33.2	2.19611	-33.2	3.06561	-33.2	1.80859	-33.1	2.33044	-33.1	2.32343
-33	2.62109	-33	2.98828	-33.1	2.58984	-33.1	2.1875	-33.1	3.04608	-33.1	1.80859	-33	2.33984	-33	2.30859
-32.9	2.60468	-32.9	2.96875	-33	2.58594	-33	2.17267	-33	3.03827	-33	1.78906	-32.9	2.32733	-32.9	2.30548
-32.8	2.59766	-32.8	2.95703	-32.9	2.59064	-32.9	2.17737	-32.9	3.03125	-32.9	1.78595	-32.8	2.3078	-32.8	2.31561
-32.7	2.58282	-32.7	2.94922	-32.8	2.58984	-32.8	2.17267	-32.8	3.01874	-32.8	1.76953	-32.7	2.29919	-32.7	2.30859
-32.6	2.57031	-32.6	2.9375	-32.7	2.59296	-32.7	2.16486	-32.7	3.00702	-32.7	1.76483	-32.6	2.29608	-32.6	2.29376
-32.5	2.55078	-32.5	2.93439	-32.6	2.58282	-32.6	2.15314	-32.6	2.9906	-32.6	1.75	-32.5	2.28436	-32.5	2.28906
-32.4	2.53906	-32.4	2.92969	-32.5	2.57813	-32.5	2.15002	-32.5	2.98749	-32.5	1.7547	-32.4	2.26953	-32.4	2.28125
-32.3	2.53595	-32.3	2.92108	-32.4	2.57031	-32.4	2.14532	-32.4	2.96405	-32.4	1.75	-32.3	2.26874	-32.3	2.27264
-32.2	2.53125	-32.2	2.92267	-32.3	2.55389	-32.3	2.12891	-32.3	2.95624	-32.3	1.73358	-32.2	2.25232	-32.2	2.26953
-32.1	2.52344	-32.1	2.91016	-32.2	2.55157	-32.2	2.12659	-32.2	2.93671	-32.2	1.73828	-32.1	2.25	-32.1	2.27423
-32	2.5	-32	2.89844	-32.1	2.54688	-32.1	2.12891	-32.1	2.92499	-32.1	1.72345	-32	2.24841	-32	2.27264
-31.9	2.48358	-31.9	2.89063	-32	2.54218	-32	2.12189	-32	2.92188	-32	1.71875	-31.9	2.2453	-31.9	2.25781
-31.8	2.48047	-31.8	2.87891	-31.9	2.53516	-31.9	2.10236	-31.9	2.90936	-31.9	1.71094	-31.8	2.23828	-31.8	2.25781
-31.7	2.46875	-31.7	2.87109	-31.8	2.53204	-31.8	2.09924	-31.8	2.89764	-31.8	1.69611	-31.7	2.23749	-31.7	2.24298
-31.6	2.47345	-31.6	2.85938	-31.7	2.53204	-31.7	2.09454	-31.7	2.88983	-31.7	1.69141	-31.6	2.22577	-31.6	2.23828
-31.5	2.47577	-31.5	2.85468	-31.6	2.53436	-31.6	2.07813	-31.6	2.87811	-31.6	1.68671	-31.5	2.22266	-31.5	2.23047
-31.4	2.46875	-31.4	2.82813	-31.5	2.52734	-31.5	2.07111	-31.5	2.85388	-31.5	1.67969	-31.4	2.21014	-31.4	2.21875
-31.3	2.46875	-31.3	2.81641	-31.4	2.52032	-31.4	2.05627	-31.4	2.82733	-31.4	1.66486	-31.3	2.20154	-31.3	2.21094
-31.2	2.46564	-31.2	2.80859	-31.3	2.52734	-31.3	2.05548	-31.3	2.82031	-31.3	1.66016	-31.2	2.19452	-31.2	2.19922
-31.1	2.46094	-31.1	2.78906	-31.2	2.52734	-31.2	2.04376	-31.2	2.8078	-31.2	1.64063	-31.1	2.19141	-31.1	2.17969
-31	2.46094	-31	2.76953	-31.1	2.51953	-31.1	2.02423	-31.1	2.78827	-31.1	1.63281	-31	2.18982	-31	2.18439
-30.9	2.45703	-30.9	2.7547	-31	2.50781	-31	1.99298	-31	2.77185	-31	1.62109	-30.9	2.17499	-30.9	2.17188
-30.8	2.46094	-30.8	2.73047	-30.9	2.4953	-30.9	1.98517	-30.9	2.7453	-30.9	1.60156	-30.8	2.16718	-30.8	2.16016
-30.7	2.45703	-30.7	2.71875	-30.8	2.47656	-30.8	1.98828	-30.8	2.72577	-30.8	1.59296	-30.7	2.15546	-30.7	2.15234
-30.6	2.46094	-30.6	2.71405	-30.7	2.47656	-30.7	1.98596	-30.7	2.70624	-30.7	1.58984	-30.6	2.14063	-30.6	2.14063
-30.5	2.45392	-30.5	2.70703	-30.6	2.47345	-30.6	1.99298	-30.6	2.69922	-30.6	1.57813	-30.5	2.11169	-30.5	2.13593
-30.4	2.45313	-30.4	2.6875	-30.5	2.46405	-30.5	1.98987	-30.5	2.67889	-30.5	1.57031	-30.4	2.09686	-30.4	2.12891
-30.3	2.44141	-30.3	2.67267	-30.4	2.44922	-30.4	1.98828	-30.4	2.66718	-30.4	1.57031	-30.3	2.08203	-30.3	2.10938
-30.2	2.44141	-30.2	2.66797	-30.3	2.4375	-30.3	1.97345	-30.3	2.64764	-30.3	1.55548	-30.2	2.06952	-30.2	2.09766
-30.1	2.43671	-30.1	2.64844	-30.2	2.43439	-30.2	1.96643	-30.2	2.63123	-30.2	1.55078	-30.1	2.0531	-30.1	2.09454
-30	2.41797	-30	2.64844	-30.1	2.44452	-30.1	1.96875	-30.1	2.61639	-30.1	1.54297	-30	2.04297	-30	2.08203
-29.9	2.41486	-29.9	2.62891	-30	2.4375	-30	1.95392	-30	2.60156	-30	1.53436	-29.9	2.03827	-29.9	2.07343
-29.8	2.41718	-29.8	2.60938	-29.9	2.43048	-29.9	1.93909	-29.9	2.58905	-29.9	1.53204	-29.8	2.01874	-29.8	2.05859
-29.7	2.39844	-29.7	2.59454	-29.8	2.42969	-29.8	1.91797	-29.8	2.56952	-29.8	1.51953	-29.7	2.00702	-29.7	2.03906
-29.6	2.37891	-29.6	2.58984	-29.7	2.42108	-29.7	1.91174	-29.7	2.54919	-29.7	1.51642	-29.6	2.00232	-29.6	2.04376
-29.5	2.37109	-29.5	2.57031	-29.6	2.40625	-29.6	1.89532	-29.6	2.54608	-29.6	1.51483	-29.5	1.9953	-29.5	2.03906
-29.4	2.35938	-29.4	2.55078	-29.5	2.38361	-29.5	1.87579	-29.5	2.51953	-29.5	1.51172	-29.4	2	-29.4	2.01953
-29.3	2.33984	-29.3	2.53125	-29.4	2.37109	-29.4	1.86407	-29.4	2.51874	-29.4	1.5047	-29.3	2.00232	-29.3	2.01483
-29.2	2.33984	-29.2	2.51483	-29.3	2.35938	-29.3	1.84766	-29.3	2.4953	-29.3	1.50702	-29.2	1.9953	-29.2	2.01251
-29.1	2.32501	-29.1	2.5	-29.2	2.34766	-29.2	1.84454	-29.2	2.47107	-29.2	1.5	-29.1	1.99219	-29.1	2
-29	2.33514	-29	2.48828	-29.1	2.33984	-29.1	1.83752	-29.1	2.46094	-29.1	1.48517	-29	1.97577	-29	1.98047
-28.9	2.32031	-28.9	2.46875	-29	2.32031	-29	1.82501	-29	2.45624	-29	1.48047	-28.9	1.96796	-28.9	1.97186
-28.8	2.30859	-28.8	2.47345	-28.9	2.30859	-28.9	1.82111	-28.9	2.44843	-28.9	1.46796	-28.8	1.95935	-28.8	1.95703
-28.7	2.30548	-28.7	2.46094	-28.8	2.30078	-28.8	1.82501	-28.8	2.42889	-28.8	1.45392	-28.7	1.94922	-28.7	1.94922
-28.6	2.3125	-28.6	2.44141	-28.7	2.28046	-28.7	1.82111	-28.7	2.40546	-28.7	1.44141	-28.6	1.93671	-28.6	1.93439
-28.5	2.29608	-28.5	2.42969	-28.6	2.27423	-28.6	1.81329	-28.6	2.39374	-28.6	1.44922	-28.5	1.92499	-28.5	1.92969
-28.4	2.28595	-28.4	2.41327	-28.5	2.25	-28.5	1.82111	-28.5	2.39374	-28.5	1.44141	-28.4	1.90546	-28.4	1.91486
-28.3	2.26953	-28.3	2.39844	-28.4	2.25	-28.4	1.81329	-28.4	2.40234	-28.4	1.4328	-28.3	1.88904	-28.3	1.90546
-28.2	2.26172	-28.2	2.38672	-28.3	2.23358	-28.3	1.80627	-28.3	2.39764	-28.3	1.42267	-28.2	1.87421	-28.2	1.89844
-28.1	2.25	-28.1	2.36719	-28.2	2.21173	-28.2	1.80548	-28.2	2.38123	-28.2	1.42657	-28.1	1.85468	-28.1	1.88361
-28	2.24219	-28	2.36407	-28.1	2.21875	-28.1	1.80859	-28.1	2.37109	-28.1	1.42188	-28	1.84296	-28	1.87109
-27.9	2.22266	-27.9	2.35938	-28	2.20233	-28	1.79846	-28	2.38123	-28	1.40546	-27.9	1.82343	-27.9	1.87109
-27.8	2.21405	-27.8	2.34296	-27.9	2.19531	-27.9	1.79376	-27.9	2.37109	-27.9	1.39063	-27.8	1.82031	-27.8	1.85156
-27.7	2.20392	-27.7	2.33984	-27.8	2.18048	-27.8	1.78595	-27.8	2.37421	-27.8	1.39532	-27.7	1.81561	-27.7	1.83514
-27.6	2.18671	-27.6	2.32813	-27.7	2.16797	-27.7	1.76642	-27.7	2.36639	-27.7	1.38593	-27.6	1.80078	-27.6	1.83282
-27.5	2.18439	-27.5	2.31641	-27.6	2.16016	-27.6	1.7547	-27.6	2.37109	-27.6	1.38361	-27.5	1.79138	-27.5	1.82031
-27.4	2.17188	-27.4	2.31329	-27.5	2.14063	-27.5	1.73828	-27.5	2.36169	-27.5	1.39063	-27.4	1.78906	-27.4	1.80389
-27.3	2.15234	-27.3	2.30078	-27.4	2.11719	-27.4	1.73596	-27.4	2.35468	-27.4	1.37421	-27.3	1.78827	-27.3	1.80157
-27.2	2.13202	-27.2	2.28906	-27.3	2.11249	-27.3	1.73517	-27.3	2.33984	-27.3	1.37579	-27.2	1.77655	-27.2	1.80078
-27.1	2.13361	-27.1	2.28436	-27.2	2.09766	-27.2	1.71564	-27.2	2.34686	-27.2	1.37421	-27.1	1.75702	-27.1	1.78906
-27	2.12109	-27	2.27032	-27.1	2.07813	-27.1	1.71173	-27.1	2.34998	-27.1	1.37656	-27	1.74921	-27	1.76953
-26.9	2.10156	-26.9	2.26953	-27	2.05469	-27	1.71173	-27	2.33984	-27	1.38281	-26.9	1.72888	-26.9	1.76172
-26.8	2.08984	-26.8	2.26251	-26.9	2.02734	-26.9	1.6969	-26.9	2.35156	-26.9	1.37421	-26.8	1.71405	-26.8	1.75781
-26.7	2.08203	-26.7	2.26483	-26.8	2.01563	-26.8	1.69922	-26.8	2.34216	-26.8	1.37579	-26.7	1.70624	-26.7	1.75781
-26.6	2.07031	-26.6	2.2547	-26.7	2.01563	-26.7	1.67267	-26.7	2.34296	-26.7	1.37109	-26.6	1.69452	-26.6	1.75781
-26.5	2.06329	-26.5	2.25311	-26.6	2.01721	-26.6	1.66956	-26.6	2.35156	-26.6	1.37421	-26.5	1.67969	-26.5	1.75
-26.4	2.07031	-26.4	2.2547	-26.5	2.02264	-26.5	1.66486	-26.5	2.34998	-26.5	1.36407	-26.4	1.66718	-26.4	1.74298
-26.3	2.0625	-26.3	2.25	-26.4	2.01251	-26.4	1.64844	-26.4	2.33984	-26.4	1.36249	-26.3	1.65546	-26.3	1.73358
-26.2	2.05078	-26.2	2.23358	-26.3	2.01093	-26.3	1.63831	-26.3	2.33905	-26.3	1.36407	-26.2	1.63904	-26.2	1.73517
-26.1	2.05078	-26.1	2.21875	-26.2	1.99609	-26.2	1.62579	-26.2	2.33203	-26.2	1.35938	-26.1	1.62891	-26.1	1.73047
-26	2.03125	-26	2.22345	-26.1	2.00079	-26.1	1.60938	-26.1	2.32263	-26.1	1.35626	-26	1.62109	-26	1.71875
-25.9	2.02344	-25.9	2.22345	-26	2.00311	-26	1.60236	-26	2.32031	-26	1.35468	-25.9	1.62341	-25.9	1.71405
-25.8	2.01483	-25.8	2.21405	-25.9	2.01251	-25.9	1.58752	-25.9	2.32733	-25.9	1.35938	-25.8	1.60938	-25.8	1.71173
-25.7	2	-25.7	2.21094	-25.8	2.01093	-25.8	1.58282	-25.8	2.33044	-25.8	1.35626	-25.7	1.59998	-25.7	1.71875
-25.6	1.98828	-25.6	2.19611	-25.7	2.02032	-25.7	1.55859	-25.7	2.32733	-25.7	1.35468	-25.6	1.60156	-25.6	1.72345
-25.5	1.98517	-25.5	2.17499	-25.6	2.01953	-25.6	1.54846	-25.6	2.30859	-25.6	1.35626	-25.5	1.59998	-25.5	1.72577
-25.4	1.98358	-25.4	2.17969	-25.5	2.01563	-25.5	1.54376	-25.5	2.3078	-25.5	1.36639	-25.4	1.58984	-25.4	1.72345
-25.3	1.98828	-25.3	2.17969	-25.4	2.01953	-25.4	1.53674	-25.4	2.31091	-25.4	1.37579	-25.3	1.58826	-25.3	1.71094
-25.2	1.98517	-25.2	2.17267	-25.3	2.00781	-25.3	1.53906	-25.3	2.30078	-25.3	1.37421	-25.2	1.58984	-25.2	1.69452
-25.1	1.96796	-25.1	2.1828	-25.2	2.00079	-25.2	1.52423	-25.2	2.30078	-25.2	1.35938	-25.1	1.58203	-25.1	1.70392
-25	1.95392	-25	2.16797	-25.1	1.98828	-25.1	1.52032	-25.1	2.3031	-25.1	1.36407	-25	1.58044	-25	1.70703
-24.9	1.95233	-24.9	2.17267	-25	1.98358	-25	1.52423	-25	2.30078	-25	1.35156	-24.9	1.57733	-24.9	1.69922
-24.8	1.95392	-24.8	2.17499	-24.9	1.98126	-24.9	1.51721	-24.9	2.29529	-24.9	1.35626	-24.8	1.5625	-24.8	1.69611
-24.7	1.94922	-24.7	2.17969	-24.8	1.98828	-24.8	1.51251	-24.8	2.28125	-24.8	1.35156	-24.7	1.54919	-24.7	1.69922
-24.6	1.94452	-24.6	2.17267	-24.7	1.98358	-24.7	1.52423	-24.7	2.26874	-24.7	1.33514	-24.6	1.54608	-24.6	1.69922
-24.5	1.93439	-24.5	2.16797	-24.6	1.98126	-24.6	1.51251	-24.6	2.26874	-24.6	1.33203	-24.5	1.53125	-24.5	1.69452
-24.4	1.92969	-24.4	2.16327	-24.5	1.97968	-24.5	1.51251	-24.5	2.26013	-24.5	1.32031	-24.4	1.52966	-24.4	1.6922
-24.3	1.92969	-24.3	2.17267	-24.4	1.96954	-24.4	1.5094	-24.4	2.25702	-24.4	1.30859	-24.3	1.53125	-24.3	1.69452
-24.2	1.92657	-24.2	2.16797	-24.3	1.96875	-24.3	1.5	-24.3	2.2453	-24.3	1.30078	-24.2	1.54608	-24.2	1.70392
-24.1	1.92188	-24.1	2.16016	-24.2	1.95392	-24.2	1.48987	-24.2	2.23749	-24.2	1.28906	-24.1	1.55078	-24.1	1.70392
-24	1.90546	-24	2.14844	-24.1	1.95233	-24.1	1.47345	-24.1	2.23047	-24.1	1.29376	-24	1.54138	-24	1.70624
-23.9	1.91016	-23.9	2.14063	-24	1.9375	-24	1.45703	-24	2.22968	-24	1.28125	-23.9	1.54608	-23.9	1.69922
-23.8	1.90314	-23.8	2.13361	-23.9	1.9422	-23.9	1.45862	-23.9	2.22107	-23.9	1.28125	-23.8	1.53906	-23.8	1.69141
-23.7	1.90546	-23.7	2.13281	-23.8	1.92969	-23.8	1.44611	-23.8	2.21405	-23.8	1.27655	-23.7	1.54138	-23.7	1.68439
-23.6	1.91486	-23.6	2.11639	-23.7	1.91797	-23.7	1.4375	-23.7	2.19922	-23.7	1.26953	-23.6	1.53906	-23.6	1.67499
-23.5	1.91016	-23.5	2.09766	-23.6	1.91797	-23.6	1.43518	-23.6	2.19843	-23.6	1.25781	-23.5	1.54138	-23.5	1.68439
-23.4	1.90546	-23.4	2.09766	-23.5	1.91327	-23.5	1.43909	-23.5	2.18201	-23.5	1.2547	-23.4	1.53906	-23.4	1.67969
-23.3	1.90314	-23.3	2.08984	-23.4	1.90625	-23.4	1.4375	-23.4	2.15546	-23.4	1.24219	-23.3	1.54608	-23.3	1.67969
-23.2	1.89844	-23.2	2.08984	-23.3	1.90625	-23.3	1.43909	-23.3	2.14374	-23.3	1.23047	-23.2	1.54608	-23.2	1.67969
-23.1	1.89063	-23.1	2.07813	-23.2	1.89142	-23.2	1.4375	-23.2	2.13593	-23.2	1.23047	-23.1	1.53906	-23.1	1.67499
-23	1.87421	-23	2.07031	-23.1	1.90155	-23.1	1.43909	-23.1	2.12109	-23.1	1.21405	-23	1.54138	-23	1.66486
-22.9	1.88361	-22.9	2.06329	-23	1.89844	-23	1.4375	-23	2.12811	-23	1.21564	-22.9	1.55078	-22.9	1.66016
-22.8	1.87891	-22.8	2.07343	-22.9	1.89142	-22.9	1.43439	-22.9	2.11169	-22.9	1.21094	-22.8	1.54608	-22.8	1.64532
-22.7	1.86407	-22.7	2.07813	-22.8	1.88672	-22.8	1.42737	-22.8	2.08984	-22.8	1.19141	-22.7	1.53827	-22.7	1.65546
-22.6	1.85156	-22.6	2.07031	-22.7	1.87891	-22.7	1.41797	-22.7	2.07733	-22.7	1.17969	-22.6	1.52655	-22.6	1.64063
-22.5	1.84296	-22.5	2.05859	-22.6	1.86719	-22.6	1.42737	-22.6	2.06561	-22.6	1.17188	-22.5	1.52185	-22.5	1.62109
-22.4	1.83984	-22.4	2.05078	-22.5	1.84766	-22.5	1.41486	-22.5	2.0578	-22.5	1.16016	-22.4	1.51483	-22.4	1.61407
-22.3	1.82031	-22.3	2.03906	-22.4	1.83984	-22.4	1.40784	-22.4	2.04608	-22.4	1.14063	-22.3	1.51172	-22.3	1.60468
-22.2	1.80859	-22.2	2.03906	-22.3	1.83282	-22.3	1.41486	-22.3	2.04138	-22.3	1.13281	-22.2	1.51013	-22.2	1.61407
-22.1	1.80859	-22.1	2.02734	-22.2	1.83984	-22.2	1.39844	-22.2	2.03906	-22.2	1.12421	-22.1	1.50311	-22.1	1.60156
-22	1.78906	-22	2.01953	-22.1	1.82343	-22.1	1.40314	-22.1	2.03827	-22.1	1.11407	-22	1.5	-22	1.60156
-21.9	1.78125	-21.9	2.01642	-22	1.81641	-22	1.39532	-22	2.02655	-22	1.10938	-21.9	1.5	-21.9	1.58984
-21.8	1.76953	-21.8	2	-21.9	1.80859	-21.9	1.38361	-21.9	2.01874	-21.9	1.10626	-21.8	1.49921	-21.8	1.58203
-21.7	1.76251	-21.7	2	-21.8	1.80859	-21.8	1.37659	-21.8	2.00702	-21.8	1.09686	-21.7	1.50232	-21.7	1.57343
-21.6	1.76172	-21.6	1.9953	-21.7	1.78906	-21.7	1.37891	-21.7	2	-21.7	1.08984	-21.6	1.50702	-21.6	1.57031
-21.5	1.76172	-21.5	1.98517	-21.6	1.77734	-21.6	1.38361	-21.6	1.99921	-21.6	1.07031	-21.5	1.5	-21.5	1.56329
-21.4	1.76483	-21.4	1.98047	-21.5	1.75781	-21.5	1.37189	-21.5	1.98749	-21.5	1.06329	-21.4	1.50702	-21.4	1.55859
-21.3	1.76642	-21.3	1.98047	-21.4	1.75079	-21.4	1.35706	-21.4	1.96796	-21.4	1.0625	-21.3	1.49921	-21.3	1.55859
-21.2	1.75	-21.2	1.97266	-21.3	1.75	-21.3	1.36407	-21.3	1.96796	-21.3	1.04608	-21.2	1.48749	-21.2	1.55078
-21.1	1.7453	-21.1	1.97577	-21.2	1.73047	-21.2	1.36719	-21.2	1.94843	-21.2	1.02423	-21.1	1.48279	-21.1	1.54218
-21	1.73828	-21	1.96875	-21.1	1.73358	-21.1	1.36407	-21.1	1.92889	-21.1	1.03125	-21	1.48047	-21	1.53906
-20.9	1.74298	-20.9	1.94922	-21	1.71875	-21	1.35706	-21	1.91718	-21	1.02264	-20.9	1.47577	-20.9	1.53906
-20.8	1.75	-20.8	1.94922	-20.9	1.70703	-20.9	1.36719	-20.9	1.90936	-20.9	1.00781	-20.8	1.46796	-20.8	1.52734
-20.7	1.74219	-20.7	1.9375	-20.8	1.69922	-20.8	1.36487	-20.8	1.90076	-20.8	1	-20.7	1.45624	-20.7	1.52423
-20.6	1.73047	-20.6	1.92969	-20.7	1.6875	-20.7	1.36877	-20.7	1.89764	-20.7	0.992981	-20.6	1.44843	-20.6	1.51953
-20.5	1.71875	-20.5	1.91486	-20.6	1.67578	-20.6	1.37891	-20.6	1.88593	-20.6	0.992188	-20.5	1.43671	-20.5	1.51172
-20.4	1.71875	-20.4	1.89374	-20.5	1.66797	-20.5	1.37189	-20.5	1.87811	-20.5	0.985168	-20.4	1.43671	-20.4	1.5047
-20.3	1.71094	-20.3	1.89063	-20.4	1.65625	-20.4	1.37189	-20.4	1.87109	-20.4	0.987488	-20.3	1.43671	-20.3	1.51483
-20.2	1.71094	-20.2	1.87891	-20.3	1.63672	-20.3	1.36877	-20.3	1.86639	-20.3	0.980469	-20.2	1.42889	-20.2	1.50781
-20.1	1.69922	-20.1	1.87891	-20.2	1.63672	-20.2	1.37579	-20.2	1.85858	-20.2	0.97345	-20.1	1.41718	-20.1	1.5
-20	1.69452	-20	1.85938	-20.1	1.62891	-20.1	1.36719	-20.1	1.85858	-20.1	0.975769	-20	1.41718	-20	1.48828
-19.9	1.69922	-19.9	1.84766	-20	1.61719	-20	1.36407	-20	1.84686	-20	0.980469	-19.9	1.40546	-19.9	1.48047
-19.8	1.6875	-19.8	1.83984	-19.9	1.61719	-19.9	1.35236	-19.9	1.83905	-19.9	0.97345	-19.8	1.38593	-19.8	1.46875
-19.7	1.67969	-19.7	1.82501	-19.8	1.61017	-19.8	1.35706	-19.8	1.81952	-19.8	0.980469	-19.7	1.38593	-19.7	1.46875
-19.6	1.66486	-19.6	1.8125	-19.7	1.60938	-19.7	1.36407	-19.7	1.8078	-19.7	0.96405	-19.6	1.37811	-19.6	1.46564
-19.5	1.65546	-19.5	1.79608	-19.6	1.59296	-19.6	1.36719	-19.6	1.81091	-19.6	0.97345	-19.5	1.38123	-19.5	1.46094
-19.4	1.64844	-19.4	1.78906	-19.5	1.59766	-19.5	1.36407	-19.5	1.79608	-19.5	0.980469	-19.4	1.37421	-19.4	1.44922
-19.3	1.64844	-19.3	1.76953	-19.4	1.58594	-19.4	1.35236	-19.4	1.78436	-19.4	0.975769	-19.3	1.35468	-19.3	1.44141
-19.2	1.64532	-19.2	1.75781	-19.3	1.56641	-19.3	1.35706	-19.3	1.77655	-19.3	0.97345	-19.2	1.35468	-19.2	1.42969
-19.1	1.64374	-19.1	1.7453	-19.2	1.57111	-19.2	1.35236	-19.2	1.76953	-19.2	0.97345	-19.1	1.33514	-19.1	1.42969
-19	1.63672	-19	1.72656	-19.1	1.55859	-19.1	1.34454	-19.1	1.76874	-19.1	0.972656	-19	1.33514	-19	1.42188
-18.9	1.62579	-18.9	1.71875	-19	1.55859	-19	1.33282	-19	1.75702	-19	0.96405	-18.9	1.32813	-18.9	1.42499
-18.8	1.61249	-18.8	1.70703	-18.9	1.54688	-18.9	1.32501	-18.9	1.73749	-18.9	0.960938	-18.8	1.32263	-18.8	1.41797
-18.7	1.61719	-18.7	1.69922	-18.8	1.54218	-18.8	1.31329	-18.8	1.73749	-18.8	0.965637	-18.7	1.30389	-18.7	1.41797
-18.6	1.60938	-18.6	1.68439	-18.7	1.52734	-18.7	1.30548	-18.7	1.71796	-18.7	0.96405	-18.6	1.29608	-18.6	1.41016
-18.5	1.61407	-18.5	1.66016	-18.6	1.51563	-18.6	1.29846	-18.6	1.70935	-18.6	0.960938	-18.5	1.28906	-18.5	1.40314
-18.4	1.60938	-18.4	1.66016	-18.5	1.49609	-18.5	1.29767	-18.5	1.70624	-18.5	0.953918	-18.4	1.28827	-18.4	1.41016
-18.3	1.60938	-18.3	1.64844	-18.4	1.48828	-18.4	1.28595	-18.4	1.70624	-18.4	0.960938	-18.3	1.28357	-18.3	1.40234
-18.2	1.60156	-18.2	1.64063	-18.3	1.47656	-18.3	1.27423	-18.3	1.69922	-18.3	0.960938	-18.2	1.28125	-18.2	1.40234
-18.1	1.60156	-18.1	1.62421	-18.2	1.46954	-18.2	1.26642	-18.2	1.69373	-18.2	0.956238	-18.1	1.28357	-18.1	1.39063
-18	1.60156	-18	1.60938	-18.1	1.47186	-18.1	1.25	-18.1	1.67969	-18.1	0.949219	-18	1.26483	-18	1.39063
-17.9	1.58984	-17.9	1.59766	-18	1.44531	-18	1.24298	-18	1.67889	-18	0.953918	-17.9	1.26483	-17.9	1.39063
-17.8	1.58984	-17.8	1.59454	-17.9	1.4375	-17.9	1.23517	-17.9	1.66718	-17.9	0.949219	-17.8	1.26483	-17.8	1.37109
-17.7	1.58203	-17.7	1.58984	-17.8	1.42578	-17.8	1.22815	-17.8	1.65546	-17.8	0.952332	-17.7	1.25702	-17.7	1.37109
-17.6	1.57031	-17.6	1.57813	-17.7	1.41095	-17.7	1.22736	-17.7	1.64764	-17.7	0.957031	-17.6	1.25702	-17.6	1.35156
-17.5	1.56561	-17.5	1.57813	-17.6	1.39374	-17.6	1.21564	-17.6	1.64063	-17.6	0.953918	-17.5	1.2453	-17.5	1.33984
-17.4	1.54688	-17.4	1.57031	-17.5	1.37189	-17.5	1.19922	-17.5	1.63983	-17.5	0.953918	-17.4	1.2453	-17.4	1.33203
-17.3	1.53204	-17.3	1.55859	-17.4	1.37891	-17.4	1.1922	-17.4	1.62811	-17.4	0.960938	-17.3	1.23358	-17.3	1.32031
-17.2	1.53906	-17.2	1.55078	-17.3	1.36719	-17.3	1.17737	-17.3	1.62341	-17.3	0.956238	-17.2	1.23047	-17.2	1.3125
-17.1	1.53125	-17.1	1.53906	-17.2	1.34766	-17.2	1.17657	-17.2	1.61639	-17.2	0.960938	-17.1	1.23749	-17.1	1.30078
-17	1.51953	-17	1.53906	-17.1	1.33984	-17.1	1.15704	-17.1	1.60858	-17.1	0.965637	-17	1.23749	-17	1.28436
-16.9	1.51172	-16.9	1.51483	-17	1.32813	-17	1.14532	-17	1.59686	-17	0.960938	-16.9	1.22577	-16.9	1.27423
-16.8	1.5	-16.8	1.5	-16.9	1.31641	-16.9	1.12579	-16.9	1.58514	-16.9	0.953125	-16.8	1.22577	-16.8	1.26953
-16.7	1.48047	-16.7	1.48828	-16.8	1.30859	-16.8	1.10938	-16.8	1.58203	-16.8	0.953125	-16.7	1.21796	-16.7	1.25702
-16.6	1.46875	-16.6	1.48828	-16.7	1.29688	-16.7	1.10236	-16.7	1.58044	-16.7	0.941406	-16.6	1.20154	-16.6	1.24298
-16.5	1.46094	-16.5	1.47656	-16.6	1.28906	-16.6	1.08282	-16.6	1.56561	-16.6	0.944519	-16.5	1.19452	-16.5	1.24219
-16.4	1.46094	-16.4	1.47345	-16.5	1.27734	-16.5	1.07971	-16.5	1.5578	-16.5	0.949219	-16.4	1.18671	-16.4	1.23047
-16.3	1.45392	-16.3	1.46405	-16.4	1.26953	-16.4	1.07501	-16.4	1.54608	-16.4	0.953918	-16.3	1.17499	-16.3	1.21094
-16.2	1.45313	-16.2	1.46173	-16.3	1.25781	-16.3	1.05548	-16.3	1.53436	-16.3	0.953125	-16.2	1.17499	-16.2	1.19922
-16.1	1.44141	-16.1	1.44922	-16.2	1.25	-16.2	1.04376	-16.2	1.52655	-16.2	0.953125	-16.1	1.16327	-16.1	1.19141
-16	1.43359	-16	1.44922	-16.1	1.24298	-16.1	1.03906	-16.1	1.51483	-16.1	0.956238	-16	1.16327	-16	1.17969
-15.9	1.42188	-15.9	1.44922	-16	1.23828	-16	1.04376	-16	1.51172	-16	0.949219	-15.9	1.16327	-15.9	1.17188
-15.8	1.40546	-15.8	1.44141	-15.9	1.23358	-15.9	1.03674	-15.9	1.51874	-15.9	0.949219	-15.8	1.15546	-15.8	1.16327
-15.7	1.39532	-15.7	1.42969	-15.8	1.22656	-15.8	1.04376	-15.8	1.50702	-15.8	0.949219	-15.7	1.15546	-15.7	1.16016
-15.6	1.39063	-15.6	1.42969	-15.7	1.21875	-15.7	1.03595	-15.7	1.4906	-15.7	0.9375	-15.6	1.14374	-15.6	1.14844
-15.5	1.38281	-15.5	1.41797	-15.6	1.21875	-15.6	1.03595	-15.6	1.48749	-15.6	0.929688	-15.5	1.14374	-15.5	1.12891
-15.4	1.37109	-15.4	1.41797	-15.5	1.20703	-15.5	1.03595	-15.5	1.48749	-15.5	0.934387	-15.4	1.13281	-15.4	1.11719
-15.3	1.37109	-15.3	1.41016	-15.4	1.1875	-15.4	1.03595	-15.4	1.47577	-15.4	0.929688	-15.3	1.11639	-15.3	1.10938
-15.2	1.36328	-15.2	1.39844	-15.3	1.1875	-15.3	1.03595	-15.3	1.46405	-15.3	0.929688	-15.2	1.10858	-15.2	1.09766
-15.1	1.34686	-15.1	1.38593	-15.2	1.17267	-15.2	1.02423	-15.2	1.46094	-15.2	0.934387	-15.1	1.09686	-15.1	1.08984
-15	1.33673	-15	1.38361	-15.1	1.17108	-15.1	1.03595	-15.1	1.46796	-15.1	0.933594	-15	1.08905	-15	1.07813
-14.9	1.33203	-14.9	1.37891	-15	1.16797	-15	1.02423	-15	1.45624	-15	0.936707	-14.9	1.07733	-14.9	1.07031
-14.8	1.33203	-14.8	1.37891	-14.9	1.15625	-14.9	1.02423	-14.9	1.45624	-14.9	0.929688	-14.8	1.07733	-14.8	1.05859
-14.7	1.3125	-14.7	1.36639	-14.8	1.14844	-14.8	1.02423	-14.8	1.44843	-14.8	0.929688	-14.7	1.06561	-14.7	1.04688
-14.6	1.3125	-14.6	1.35236	-14.7	1.13672	-14.7	1.01251	-14.7	1.43671	-14.7	0.918762	-14.6	1.0578	-14.6	1.03906
-14.5	1.30078	-14.5	1.35938	-14.6	1.12891	-14.6	1.0047	-14.6	1.41718	-14.6	0.914063	-14.5	1.0578	-14.5	1.02734
-14.4	1.30078	-14.4	1.35156	-14.5	1.11719	-14.5	1.01251	-14.5	1.40936	-14.5	0.902344	-14.4	1.0578	-14.4	1.01953
-14.3	1.29297	-14.3	1.33514	-14.4	1.12189	-14.4	1.0047	-14.4	1.39764	-14.4	0.902344	-14.3	1.04608	-14.3	1.00781
-14.2	1.27655	-14.2	1.32813	-14.3	1.10938	-14.3	1.00781	-14.3	1.39764	-14.3	0.902344	-14.2	1.03827	-14.2	0.992981
-14.1	1.26172	-14.1	1.31641	-14.2	1.09766	-14.2	1.0094	-14.2	1.38593	-14.2	0.902344	-14.1	1.03827	-14.1	0.988281
-14	1.25	-14	1.31641	-14.1	1.08984	-14.1	0.992981	-14.1	1.37811	-14.1	0.890625	-14	1.02655	-14	0.980469
-13.9	1.23828	-13.9	1.30859	-14	1.08984	-14	0.992981	-14	1.37811	-14	0.882813	-13.9	1.00702	-13.9	0.960938
-13.8	1.23047	-13.8	1.30859	-13.9	1.07813	-13.9	0.985168	-13.9	1.36639	-13.9	0.871094	-13.8	0.999207	-13.8	0.949219
-13.7	1.23047	-13.7	1.29688	-13.8	1.07031	-13.8	0.985168	-13.8	1.36951	-13.8	0.858582	-13.7	0.987488	-13.7	0.941406
-13.6	1.21094	-13.6	1.28906	-13.7	1.05859	-13.7	0.985168	-13.7	1.36639	-13.7	0.839844	-13.6	0.987488	-13.6	0.929688
-13.5	1.19922	-13.5	1.27734	-13.6	1.05078	-13.6	0.985168	-13.6	1.35468	-13.6	0.832031	-13.5	0.971069	-13.5	0.921875
-13.4	1.19922	-13.4	1.26953	-13.5	1.03906	-13.5	0.97345	-13.5	1.33514	-13.5	0.820313	-13.4	0.956238	-13.4	0.905457
-13.3	1.19141	-13.3	1.25781	-13.4	1.04218	-13.4	0.965637	-13.4	1.32343	-13.4	0.815613	-13.3	0.944519	-13.3	0.883606
-13.2	1.17969	-13.2	1.25	-13.3	1.03516	-13.3	0.965637	-13.3	1.30389	-13.3	0.800781	-13.2	0.941406	-13.2	0.878906
-13.1	1.17188	-13.1	1.23828	-13.2	1.03986	-13.2	0.953918	-13.2	1.30859	-13.2	0.789063	-13.1	0.928894	-13.1	0.866394
-13	1.16016	-13	1.22656	-13.1	1.03906	-13.1	0.953918	-13.1	1.3078	-13.1	0.777344	-13	0.917175	-13	0.859375
-12.9	1.14844	-12.9	1.21875	-13	1.02734	-13	0.953918	-13	1.29608	-13	0.766418	-12.9	0.909363	-12.9	0.847656
-12.8	1.13593	-12.8	1.20703	-12.9	1.02734	-12.9	0.953918	-12.9	1.28357	-12.9	0.75	-12.8	0.892944	-12.8	0.839844
-12.7	1.11719	-12.7	1.19922	-12.8	1.00781	-12.8	0.949219	-12.8	1.26483	-12.8	0.75	-12.7	0.885925	-12.7	0.825012
-12.6	1.10626	-12.6	1.1875	-12.7	1	-12.7	0.953918	-12.7	1.26483	-12.7	0.7453	-12.6	0.874207	-12.6	0.820313
-12.5	1.10156	-12.5	1.17657	-12.6	0.976563	-12.6	0.958618	-12.6	1.25702	-12.6	0.71875	-12.5	0.866394	-12.5	0.800781
-12.4	1.08514	-12.4	1.16327	-12.5	0.96875	-12.5	0.965637	-12.5	1.2453	-12.5	0.71875	-12.4	0.854675	-12.4	0.800781
-12.3	1.07813	-12.3	1.16486	-12.4	0.952332	-12.4	0.965637	-12.4	1.23358	-12.4	0.699219	-12.3	0.846863	-12.3	0.78125
-12.2	1.07031	-12.2	1.14844	-12.3	0.945313	-12.3	0.953918	-12.3	1.22577	-12.3	0.691406	-12.2	0.84375	-12.2	0.78125
-12.1	1.05548	-12.1	1.14063	-12.2	0.925781	-12.2	0.965637	-12.2	1.23047	-12.2	0.679688	-12.1	0.827332	-12.1	0.769531
-12	1.04297	-12	1.13202	-12.1	0.917969	-12.1	0.953918	-12.1	1.23749	-12.1	0.664856	-12	0.8078	-12	0.769531
-11.9	1.03125	-11.9	1.12891	-12	0.90625	-12	0.953918	-12	1.22577	-12	0.655457	-11.9	0.799988	-11.9	0.761719
-11.8	1.01953	-11.8	1.11719	-11.9	0.899231	-11.9	0.9422	-11.9	1.21796	-11.9	0.640625	-11.8	0.788269	-11.8	0.75
-11.7	1.01172	-11.7	1.10938	-11.8	0.898438	-11.8	0.934387	-11.8	1.20624	-11.8	0.628906	-11.7	0.771851	-11.7	0.75
-11.6	0.9953	-11.6	1.10236	-11.7	0.886719	-11.7	0.922668	-11.7	1.19843	-11.7	0.621094	-11.6	0.757019	-11.6	0.7453
-11.5	0.980469	-11.5	1.10156	-11.6	0.878906	-11.6	0.903137	-11.6	1.18671	-11.6	0.601563	-11.5	0.752319	-11.5	0.75
-11.4	0.965637	-11.4	1.08984	-11.5	0.867188	-11.5	0.903137	-11.5	1.18671	-11.5	0.589844	-11.4	0.733582	-11.4	0.738281
-11.3	0.956238	-11.3	1.07813	-11.4	0.859375	-11.4	0.883606	-11.4	1.17889	-11.4	0.578125	-11.3	0.725769	-11.3	0.738281
-11.2	0.949219	-11.2	1.07031	-11.3	0.847656	-11.3	0.875793	-11.3	1.17188	-11.3	0.570313	-11.2	0.71405	-11.2	0.731262
-11.1	0.936707	-11.1	1.05859	-11.2	0.844543	-11.2	0.864075	-11.2	1.16718	-11.2	0.558594	-11.1	0.706238	-11.1	0.730469
-11	0.917969	-11	1.05078	-11.1	0.842957	-11.1	0.852356	-11.1	1.15936	-11.1	0.555481	-11	0.694519	-11	0.730469
-10.9	0.903137	-10.9	1.03125	-11	0.828125	-11	0.844543	-11	1.14294	-11	0.542969	-10.9	0.686707	-10.9	0.71875
-10.8	0.885925	-10.8	1.03125	-10.9	0.828125	-10.9	0.844543	-10.9	1.13593	-10.9	0.53125	-10.8	0.671875	-10.8	0.715637
-10.7	0.878906	-10.7	1.01953	-10.8	0.816406	-10.8	0.832825	-10.8	1.12811	-10.8	0.523438	-10.7	0.667175	-10.7	0.710938
-10.6	0.867188	-10.6	1.01172	-10.7	0.813293	-10.7	0.825012	-10.7	1.11639	-10.7	0.511719	-10.6	0.667175	-10.6	0.71405
-10.5	0.859375	-10.5	1	-10.6	0.800781	-10.6	0.813293	-10.6	1.11639	-10.6	0.503906	-10.5	0.647644	-10.5	0.710938
-10.4	0.844543	-10.4	0.980469	-10.5	0.792175	-10.5	0.808594	-10.5	1.10858	-10.5	0.492188	-10.4	0.647644	-10.4	0.699219
-10.3	0.839844	-10.3	0.980469	-10.4	0.793762	-10.4	0.786743	-10.4	1.09686	-10.4	0.492188	-10.3	0.639038	-10.3	0.691406
-10.2	0.832031	-10.2	0.96875	-10.3	0.772644	-10.3	0.793762	-10.3	1.09216	-10.3	0.492188	-10.2	0.632813	-10.2	0.679688
-10.1	0.820313	-10.1	0.960938	-10.2	0.765625	-10.2	0.774231	-10.2	1.07343	-10.2	0.487488	-10.1	0.608582	-10.1	0.676575
-10	0.8125	-10	0.949219	-10.1	0.757813	-10.1	0.762512	-10.1	1.0625	-10.1	0.46875	-10	0.596863	-10	0.652344
-9.9	0.8078	-9.9	0.941406	-10	0.746094	-10	0.7547	-10	1.04608	-10	0.460938	-9.9	0.585144	-9.9	0.647644
-9.8	0.789063	-9.8	0.929688	-9.9	0.742981	-9.9	0.7547	-9.9	1.04608	-9.9	0.449219	-9.8	0.565613	-9.8	0.628906
-9.7	0.777344	-9.7	0.910156	-9.8	0.733582	-9.8	0.742981	-9.8	1.03357	-9.8	0.441406	-9.7	0.5578	-9.7	0.621094
-9.6	0.769531	-9.6	0.910156	-9.7	0.726563	-9.7	0.739868	-9.7	1.02655	-9.7	0.424988	-9.6	0.541382	-9.6	0.604675
-9.5	0.757813	-9.5	0.885925	-9.6	0.72345	-9.6	0.735168	-9.6	1.01483	-9.6	0.414856	-9.5	0.52655	-9.5	0.589844
-9.4	0.746887	-9.4	0.867188	-9.5	0.71875	-9.5	0.715637	-9.5	1.01483	-9.5	0.413269	-9.4	0.507019	-9.4	0.578125
-9.3	0.742188	-9.3	0.859375	-9.4	0.71405	-9.4	0.696106	-9.4	0.9953	-9.4	0.407043	-9.3	0.4953	-9.3	0.578125
-9.2	0.737488	-9.2	0.847656	-9.3	0.707031	-9.3	0.699219	-9.3	0.984375	-9.3	0.390625	-9.2	0.475769	-9.2	0.575012
-9.1	0.730469	-9.1	0.825012	-9.2	0.707031	-9.2	0.684387	-9.2	0.967957	-9.2	0.390625	-9.1	0.46405	-9.1	0.570313
-9	0.71875	-9	0.820313	-9.1	0.703918	-9.1	0.684387	-9.1	0.956238	-9.1	0.382813	-9	0.456238	-9	0.5625
-8.9	0.715637	-8.9	0.808594	-9	0.699219	-9	0.672668	-9	0.943726	-9	0.371094	-8.9	0.436707	-8.9	0.550781
-8.8	0.698425	-8.8	0.800781	-8.9	0.702332	-8.9	0.653137	-8.9	0.936707	-8.9	0.371094	-8.8	0.424988	-8.8	0.550781
-8.7	0.691406	-8.7	0.800781	-8.8	0.695313	-8.8	0.657837	-8.8	0.936707	-8.8	0.359375	-8.7	0.424988	-8.7	0.546082
-8.6	0.674988	-8.6	0.789063	-8.7	0.6875	-8.7	0.657043	-8.7	0.924988	-8.7	0.351563	-8.6	0.410156	-8.6	0.519531
-8.5	0.664856	-8.5	0.77655	-8.6	0.6875	-8.6	0.645325	-8.6	0.917175	-8.6	0.351563	-8.5	0.405457	-8.5	0.516418
-8.4	0.652344	-8.4	0.757813	-8.5	0.675781	-8.5	0.645325	-8.5	0.905457	-8.5	0.339844	-8.4	0.397644	-8.4	0.503113
-8.3	0.652344	-8.3	0.757813	-8.4	0.667969	-8.4	0.633606	-8.4	0.902344	-8.4	0.332031	-8.3	0.385925	-8.3	0.5047
-8.2	0.640625	-8.2	0.742981	-8.3	0.667969	-8.3	0.633606	-8.3	0.889832	-8.3	0.332031	-8.2	0.366394	-8.2	0.4953
-8.1	0.635925	-8.1	0.742188	-8.2	0.667969	-8.2	0.625793	-8.2	0.878113	-8.2	0.320313	-8.1	0.346863	-8.1	0.480469
-8	0.614075	-8	0.730469	-8.1	0.667969	-8.1	0.614075	-8.1	0.878113	-8.1	0.3125	-8	0.346863	-8	0.46875
-7.9	0.601563	-7.9	0.71875	-8	0.653137	-8	0.606262	-8	0.873413	-8	0.300781	-7.9	0.327332	-7.9	0.46875
-7.8	0.596863	-7.8	0.710938	-7.9	0.648438	-7.9	0.594543	-7.9	0.858582	-7.9	0.300781	-7.8	0.327332	-7.8	0.47345
-7.7	0.578125	-7.7	0.702332	-7.8	0.648438	-7.8	0.589844	-7.8	0.858582	-7.8	0.300781	-7.7	0.315613	-7.7	0.460938
-7.6	0.570313	-7.6	0.6875	-7.7	0.643738	-7.7	0.582825	-7.7	0.855469	-7.7	0.289063	-7.6	0.3078	-7.6	0.460938
-7.5	0.555481	-7.5	0.679688	-7.6	0.636719	-7.6	0.579712	-7.6	0.83905	-7.6	0.28125	-7.5	0.296082	-7.5	0.449219
-7.4	0.550781	-7.4	0.667969	-7.5	0.628906	-7.5	0.563293	-7.5	0.827332	-7.5	0.261719	-7.4	0.288269	-7.4	0.441406
-7.3	0.542969	-7.3	0.65625	-7.4	0.614075	-7.4	0.555481	-7.4	0.814819	-7.4	0.261719	-7.3	0.279663	-7.3	0.441406
-7.2	0.52655	-7.2	0.645325	-7.3	0.609375	-7.3	0.543762	-7.3	0.8125	-7.3	0.25	-7.2	0.264832	-7.2	0.429688
-7.1	0.519531	-7.1	0.636719	-7.2	0.609375	-7.2	0.53595	-7.2	0.814819	-7.2	0.242188	-7.1	0.2453	-7.1	0.421875
-7	0.519531	-7	0.640625	-7.1	0.596863	-7.1	0.53595	-7.1	0.8078	-7.1	0.225769	-7	0.2453	-7	0.424988
-6.9	0.496887	-6.9	0.628906	-7	0.578125	-7	0.519531	-7	0.791382	-7	0.210938	-6.9	0.233582	-6.9	0.417969
-6.8	0.487488	-6.8	0.621094	-6.9	0.578125	-6.9	0.512512	-6.9	0.773438	-6.9	0.199219	-6.8	0.230469	-6.8	0.410156
-6.7	0.456238	-6.7	0.609375	-6.8	0.578125	-6.8	0.512512	-6.8	0.768738	-6.8	0.1875	-6.7	0.225769	-6.7	0.407043
-6.6	0.449219	-6.6	0.601563	-6.7	0.578125	-6.7	0.5047	-6.7	0.757019	-6.7	0.184387	-6.6	0.217957	-6.6	0.390625
-6.5	0.434387	-6.5	0.589844	-6.6	0.561707	-6.6	0.5047	-6.6	0.752319	-6.6	0.186707	-6.5	0.206238	-6.5	0.390625
-6.4	0.429688	-6.4	0.578125	-6.5	0.546875	-6.5	0.492981	-6.5	0.742188	-6.5	0.167969	-6.4	0.210938	-6.4	0.371094
-6.3	0.410156	-6.3	0.558594	-6.4	0.546875	-6.4	0.485168	-6.4	0.729675	-6.4	0.160156	-6.3	0.205444	-6.3	0.371094
-6.2	0.405457	-6.2	0.546082	-6.3	0.543762	-6.3	0.47345	-6.3	0.729675	-6.3	0.148438	-6.2	0.186707	-6.2	0.359375
-6.1	0.383606	-6.1	0.524231	-6.2	0.539063	-6.2	0.461731	-6.2	0.717957	-6.2	0.140625	-6.1	0.186707	-6.1	0.359375
-6	0.385925	-6	0.519531	-6.1	0.539063	-6.1	0.453918	-6.1	0.706238	-6.1	0.128906	-6	0.179688	-6	0.346863
-5.9	0.356262	-5.9	0.511719	-6	0.522644	-6	0.439087	-6	0.693726	-6	0.121094	-5.9	0.186707	-5.9	0.339844
-5.8	0.351563	-5.8	0.5	-5.9	0.515625	-5.9	0.421875	-5.9	0.674988	-5.9	0.109375	-5.8	0.182007	-5.8	0.339844
-5.7	0.339844	-5.7	0.480469	-5.8	0.5047	-5.8	0.414856	-5.8	0.664063	-5.8	0.0976563	-5.7	0.174988	-5.7	0.328125
-5.6	0.332031	-5.6	0.46875	-5.7	0.483582	-5.7	0.403137	-5.7	0.654663	-5.7	0.078125	-5.6	0.174988	-5.6	0.328125
-5.5	0.320313	-5.5	0.460938	-5.6	0.476563	-5.6	0.395325	-5.6	0.647644	-5.6	0.0671997	-5.5	0.167175	-5.5	0.305481
-5.4	0.315613	-5.4	0.449219	-5.5	0.476563	-5.5	0.395325	-5.5	0.635925	-5.5	0.0507813	-5.4	0.167175	-5.4	0.300781
-5.3	0.289063	-5.3	0.441406	-5.4	0.47345	-5.4	0.378906	-5.4	0.631226	-5.4	0.03125	-5.3	0.155457	-5.3	0.292969
-5.2	0.28125	-5.2	0.429688	-5.3	0.460938	-5.3	0.376587	-5.3	0.613281	-5.3	0.0195313	-5.2	0.155457	-5.2	0.292969
-5.1	0.266418	-5.1	0.417175	-5.2	0.444519	-5.2	0.371094	-5.2	0.596863	-5.2	0.0117188	-5.1	0.155457	-5.1	0.28125
-5	0.2453	-5	0.403137	-5.1	0.4422	-5.1	0.352356	-5.1	0.596863	-5.1	0	-5	0.147644	-5	0.28125
-4.9	0.230469	-4.9	0.393738	-5	0.424988	-5	0.349243	-5	0.596863	-5	-0.0078125	-4.9	0.135925	-4.9	0.28125
-4.8	0.21875	-4.8	0.378906	-4.9	0.417969	-4.9	0.344543	-4.9	0.596863	-4.9	-0.00469971	-4.8	0.135925	-4.8	0.269531
-4.7	0.21875	-4.7	0.371887	-4.8	0.398438	-4.8	0.332825	-4.8	0.58905	-4.8	-0.00701904	-4.7	0.140625	-4.7	0.261719
-4.6	0.210938	-4.6	0.371094	-4.7	0.386719	-4.7	0.320313	-4.7	0.58905	-4.7	-0.0195313	-4.6	0.142944	-4.6	0.264832
-4.5	0.199219	-4.5	0.371094	-4.6	0.367188	-4.6	0.313293	-4.6	0.577332	-4.6	-0.0273438	-4.5	0.124207	-4.5	0.257813
-4.4	0.179688	-4.4	0.359375	-4.5	0.367188	-4.5	0.298462	-4.5	0.577332	-4.5	-0.0390625	-4.4	0.116394	-4.4	0.238281
-4.3	0.174988	-4.3	0.351563	-4.4	0.347656	-4.4	0.293762	-4.4	0.565613	-4.4	-0.055481	-4.3	0.109375	-4.3	0.230469
-4.2	0.148438	-4.2	0.342957	-4.3	0.332825	-4.3	0.28595	-4.3	0.5578	-4.3	-0.0578003	-4.2	0.108582	-4.2	0.21875
-4.1	0.136719	-4.1	0.347656	-4.2	0.328125	-4.2	0.269531	-4.2	0.5578	-4.2	-0.0585938	-4.1	0.111694	-4.1	0.21875
-4	0.128906	-4	0.332825	-4.1	0.320313	-4.1	0.2547	-4.1	0.538269	-4.1	-0.0703125	-4	0.104675	-4	0.21875
-3.9	0.128906	-3.9	0.339844	-4	0.308594	-4	0.242981	-4	0.52655	-4	-0.0734253	-3.9	0.109375	-3.9	0.22345
-3.8	0.117188	-3.8	0.320313	-3.9	0.300781	-3.9	0.242981	-3.9	0.52655	-3.9	-0.078125	-3.8	0.116394	-3.8	0.21875
-3.7	0.0976563	-3.7	0.323425	-3.8	0.284363	-3.8	0.231262	-3.8	0.507019	-3.8	-0.0750122	-3.7	0.119507	-3.7	0.210938
-3.6	0.0945435	-3.6	0.316406	-3.7	0.269531	-3.7	0.231262	-3.7	0.499207	-3.7	-0.0703125	-3.6	0.124207	-3.6	0.21405
-3.5	0.0898438	-3.5	0.313293	-3.6	0.257813	-3.6	0.22345	-3.6	0.475769	-3.6	-0.0734253	-3.5	0.121094	-3.5	0.211731
-3.4	0.0703125	-3.4	0.320313	-3.5	0.242981	-3.5	0.211731	-3.5	0.467957	-3.5	-0.078125	-3.4	0.128113	-3.4	0.210938
-3.3	0.0703125	-3.3	0.308594	-3.4	0.238281	-3.4	0.203918	-3.4	0.448425	-3.4	-0.0750122	-3.3	0.116394	-3.3	0.199219
-3.2	0.0507813	-3.2	0.305481	-3.3	0.21875	-3.3	0.200806	-3.3	0.436707	-3.3	-0.085144	-3.2	0.119507	-3.2	0.199219
-3.1	0.0507813	-3.1	0.3125	-3.2	0.21875	-3.2	0.196106	-3.2	0.428894	-3.2	-0.078125	-3.1	0.116394	-3.1	0.184387
-3	0.0507813	-3	0.300781	-3.1	0.202332	-3.1	0.179688	-3.1	0.405457	-3.1	-0.086731	-3	0.116394	-3	0.183594
-2.9	0.0390625	-2.9	0.303894	-3	0.207031	-3	0.172668	-3	0.392944	-3	-0.0773315	-2.9	0.104675	-2.9	0.171875
-2.8	0.03125	-2.8	0.289063	-2.9	0.195313	-2.9	0.164856	-2.9	0.371094	-2.9	-0.0656128	-2.8	0.104675	-2.8	0.155457
-2.7	0.03125	-2.7	0.277344	-2.8	0.1922	-2.8	0.153137	-2.8	0.366394	-2.8	-0.0585938	-2.7	0.0976563	-2.7	0.145325
-2.6	0.0195313	-2.6	0.269531	-2.7	0.1875	-2.7	0.153137	-2.7	0.346863	-2.7	-0.055481	-2.6	0.0968628	-2.6	0.140625
-2.5	0.024231	-2.5	0.269531	-2.6	0.179688	-2.6	0.145325	-2.6	0.33905	-2.6	-0.0429688	-2.5	0.0968628	-2.5	0.132813
-2.4	0.0265503	-2.4	0.257813	-2.5	0.163269	-2.5	0.133606	-2.5	0.327332	-2.5	-0.0265503	-2.4	0.0968628	-2.4	0.121094
-2.3	0.0195313	-2.3	0.262512	-2.4	0.15625	-2.4	0.133606	-2.4	0.299194	-2.4	-0.0273438	-2.3	0.085144	-2.3	0.113281
-2.2	0.024231	-2.2	0.25	-2.3	0.153137	-2.3	0.121887	-2.3	0.296082	-2.3	-0.024231	-2.2	0.085144	-2.2	0.0968628
-2.1	0.0195313	-2.1	0.242188	-2.2	0.136719	-2.2	0.114075	-2.2	0.284363	-2.2	-0.0148315	-2.1	0.0773315	-2.1	0.0898438
-2	0.0195313	-2	0.21875	-2.1	0.128906	-2.1	0.114075	-2.1	0.264832	-2.1	-0.0164185	-2	0.0820313	-2	0.078125
-1.9	0.0148315	-1.9	0.21405	-2	0.117188	-2	0.102356	-2	0.2453	-2	-0.00701904	-1.9	0.0890503	-1.9	0.0703125
-1.8	0.0078125	-1.8	0.207031	-1.9	0.0976563	-1.9	0.0945435	-1.9	0.230469	-1.9	-0.0148315	-1.8	0.0890503	-1.8	0.0585938
-1.7	0.0125122	-1.7	0.199219	-1.8	0.078125	-1.8	0.0945435	-1.8	0.237488	-1.8	-0.00469971	-1.7	0.0921631	-1.7	0.0632935
-1.6	0.0117188	-1.6	0.199219	-1.7	0.0734253	-1.7	0.0945435	-1.7	0.217957	-1.7	0.0078125	-1.6	0.0968628	-1.6	0.0625
-1.5	0.0148315	-1.5	0.1922	-1.6	0.071106	-1.6	0.0828247	-1.6	0.198425	-1.6	0.0078125	-1.5	0.085144	-1.5	0.053894
-1.4	0.0078125	-1.4	0.179688	-1.5	0.0585938	-1.5	0.0828247	-1.5	0.174988	-1.5	0.0125122	-1.4	0.0773315	-1.4	0.0390625
-1.3	0.0125122	-1.3	0.171875	-1.4	0.0585938	-1.4	0.0750122	-1.4	0.167175	-1.4	0.0148315	-1.3	0.0656128	-1.3	0.0273438
-1.2	0.0117188	-1.2	0.160156	-1.3	0.0437622	-1.3	0.0632935	-1.3	0.140625	-1.3	0.0195313	-1.2	0.0578003	-1.2	0.0195313
-1.1	0.00469971	-1.1	0.140625	-1.2	0.0390625	-1.2	0.0632935	-1.2	0.139832	-1.2	0.0195313	-1.1	0.0460815	-1.1	0.0125122
-1	0.0148315	-1	0.128906	-1.1	0.022644	-1.1	0.055481	-1.1	0.128113	-1.1	0.0125122	-1	0.0507813	-1	0.0117188
-0.899998	0.0078125	-0.899998	0.124207	-1	0.0273438	-1	0.055481	-1	0.108582	-1	0.0195313	-0.899998	0.0460815	-0.899998	0
-0.799999	0	-0.799999	0.117188	-0.900002	0.0320435	-0.900002	0.0437622	-0.900002	0.0921631	-0.900002	0.0148315	-0.799999	0.038269	-0.799999	0.00311279
-0.699997	0.00469971	-0.699997	0.109375	-0.799999	0.0195313	-0.799999	0.0437622	-0.799999	0.0773315	-0.799999	0.0195313	-0.699997	0.038269	-0.699997	0.00469971
-0.599998	0.0148315	-0.599998	0.0898438	-0.700001	0.0109253	-0.700001	0.0437622	-0.700001	0.0656128	-0.700001	0.024231	-0.599998	0.0265503	-0.599998	0
-0.5	0.0078125	-0.5	0.0828247	-0.600002	0.0078125	-0.600002	0.0320435	-0.600002	0.0625	-0.600002	0.03125	-0.5	0.0187378	-0.5	0.00311279
-0.399998	0.0125122	-0.399998	0.0703125	-0.5	7.93457E-4	-0.5	0.024231	-0.5	0.0499878	-0.5	0.03125	-0.399998	0.00701904	-0.399998	0.0078125
-0.299999	0.0117188	-0.299999	0.0585938	-0.400002	0.0078125	-0.400002	0.024231	-0.400002	0.038269	-0.400002	0.0195313	-0.299999	0.00701904	-0.299999	0
-0.199997	0.00311279	-0.199997	0.0390625	-0.299999	0.0109253	-0.299999	0.0172119	-0.299999	0.0187378	-0.299999	0.0195313	-0.199997	0.0101318	-0.199997	-0.00701904
-0.0999985	0.00469971	-0.0999985	0.0195313	-0.200001	0.0078125	-0.200001	0.024231	-0.200001	0.0101318	-0.200001	0.0195313	-0.0999985	0.00701904	-0.0999985	0.00469971
0	0	0	0	-0.100002	7.93457E-4	-0.100002	0.0164185	-0.100002	0.0148315	-0.100002	0.0117188	0	2.27374E-13	0	0
0.100002	0	0.100002	-0.0164185	0	0	0	-2.27374E-13	0	2.27374E-13	0	0	0.100002	-0.00469971	0.100002	0
0.200001	-0.0078125	0.200001	-0.0234375	0.0999985	0	0.0999985	-0.0148315	0.0999985	0.00231934	0.0999985	0	0.200001	-0.0125122	0.200001	-0.0078125
0.300003	-0.0164185	0.300003	-0.038269	0.200001	-0.0234375	0.200001	-0.0101318	0.200001	-0.00469971	0.200001	0.00469971	0.300003	-0.0125122	0.300003	-0.0164185
0.400002	-0.0234375	0.400002	-0.0390625	0.299999	-0.0234375	0.299999	-0.0148315	0.299999	-0.0117188	0.299999	0.0117188	0.400002	-0.0211182	0.400002	-0.0117188
0.5	-0.0265503	0.5	-0.0460815	0.399998	-0.03125	0.399998	-0.0265503	0.399998	-0.0125122	0.399998	0.00701904	0.5	-0.0195313	0.5	-0.0148315
0.600002	-0.0390625	0.600002	-0.055481	0.5	-0.038269	0.5	-0.0343628	0.5	-0.0078125	0.5	0	0.600002	-0.0125122	0.600002	-0.0195313
0.700001	-0.0390625	0.700001	-0.0625	0.599998	-0.0390625	0.599998	-0.0460815	0.599998	-0.00939941	0.599998	-0.00311279	0.700001	-0.024231	0.700001	-0.0273438
0.800003	-0.0390625	0.800003	-0.0656128	0.700001	-0.0507813	0.700001	-0.0460815	0.700001	-0.0125122	0.700001	-0.00469971	0.800003	-0.0320435	0.800003	-0.0390625
0.900002	-0.0460815	0.900002	-0.0703125	0.799999	-0.0476685	0.799999	-0.053894	0.799999	-0.0195313	0.799999	0	0.900002	-0.0437622	0.900002	-0.0359497
1	-0.046875	1	-0.0898438	0.899998	-0.0507813	0.899998	-0.0656128	0.899998	-0.0125122	0.899998	-0.00701904	1	-0.0437622	1	-0.0507813
1.1	-0.0585938	1.1	-0.0976563	1	-0.0460815	1	-0.0734253	1	-0.0172119	1	-0.0078125	1.1	-0.0585938	1.1	-0.0507813
1.2	-0.0585938	1.2	-0.117981	1.1	-0.0476685	1.1	-0.085144	1.1	-0.0125122	1.1	-0.0078125	1.2	-0.0632935	1.2	-0.0507813
1.3	-0.0664063	1.3	-0.121094	1.2	-0.0429688	1.2	-0.0929565	1.2	-0.024231	1.2	-0.0195313	1.3	-0.0601807	1.3	-0.0625
1.4	-0.078125	1.4	-0.128113	1.3	-0.0507813	1.3	-0.104675	1.3	-0.0437622	1.3	-0.0273438	1.4	-0.0632935	1.4	-0.0656128
1.5	-0.078125	1.5	-0.140625	1.4	-0.0625	1.4	-0.116394	1.4	-0.0390625	1.4	-0.0390625	1.5	-0.0632935	1.5	-0.0585938
1.6	-0.0976563	1.6	-0.148438	1.5	-0.0578003	1.5	-0.124207	1.5	-0.0320435	1.5	-0.0437622	1.6	-0.0828247	1.6	-0.0585938
1.7	-0.0945435	1.7	-0.160156	1.6	-0.0703125	1.6	-0.124207	1.6	-0.0406494	1.6	-0.0507813	1.7	-0.0945435	1.7	-0.0585938
1.8	-0.101563	1.8	-0.171875	1.7	-0.0703125	1.7	-0.132813	1.7	-0.0437622	1.7	-0.053894	1.8	-0.0945435	1.8	-0.0585938
1.9	-0.101563	1.9	-0.179688	1.8	-0.0789185	1.8	-0.128113	1.8	-0.0390625	1.8	-0.0703125	1.9	-0.102356	1.9	-0.0703125
2	-0.109375	2	-0.191406	1.9	-0.0773315	1.9	-0.135925	1.9	-0.0320435	1.9	-0.078125	2	-0.109375	2	-0.0671997
2.1	-0.121094	2.1	-0.199219	2	-0.0820313	2	-0.147644	2	-0.0211182	2	-0.0898438	2.1	-0.110168	2.1	-0.0703125
2.2	-0.121094	2.2	-0.199219	2.1	-0.0820313	2.1	-0.150757	2.1	-0.0117188	2.1	-0.0976563	2.2	-0.118774	2.2	-0.085144
2.3	-0.124207	2.3	-0.210938	2.2	-0.0898438	2.2	-0.155457	2.2	-0.00469971	2.2	-0.109375	2.3	-0.117188	2.3	-0.086731
2.4	-0.117188	2.4	-0.210938	2.3	-0.0898438	2.3	-0.155457	2.3	-0.0125122	2.3	-0.128906	2.4	-0.130493	2.4	-0.0929565
2.5	-0.133606	2.5	-0.215637	2.4	-0.0984497	2.4	-0.174988	2.4	-0.0078125	2.4	-0.140625	2.5	-0.133606	2.5	-0.0976563
2.6	-0.140625	2.6	-0.222656	2.5	-0.105469	2.5	-0.174988	2.5	-7.93457E-4	2.5	-0.148438	2.6	-0.133606	2.6	-0.106262
2.7	-0.135925	2.7	-0.217957	2.6	-0.108582	2.6	-0.186707	2.6	-0.0125122	2.6	-0.160156	2.7	-0.145325	2.7	-0.101563
2.8	-0.128906	2.8	-0.210938	2.7	-0.113281	2.7	-0.191406	2.7	-0.0125122	2.7	-0.164856	2.8	-0.148438	2.8	-0.101563
2.9	-0.128906	2.9	-0.21875	2.8	-0.121094	2.8	-0.198425	2.8	-0.00939941	2.8	-0.171875	2.9	-0.153137	2.9	-0.113281
3	-0.140625	3	-0.210938	2.9	-0.121094	2.9	-0.201538	2.9	-0.00469971	2.9	-0.179688	3	-0.172668	3	-0.121094
3.1	-0.145325	3.1	-0.21405	3	-0.132813	3	-0.206238	3	-0.0125122	3	-0.194519	3.1	-0.169556	3.1	-0.132813
3.2	-0.152344	3.2	-0.215637	3.1	-0.140625	3.1	-0.203125	3.1	-0.0125122	3.1	-0.203918	3.2	-0.184387	3.2	-0.135925
3.3	-0.152344	3.3	-0.210938	3.2	-0.152344	3.2	-0.206238	3.2	-0.0078125	3.2	-0.210938	3.3	-0.179688	3.3	-0.128906
3.4	-0.152344	3.4	-0.210938	3.3	-0.160156	3.3	-0.217957	3.3	-0.0125122	3.3	-0.233582	3.4	-0.184387	3.4	-0.128906
3.5	-0.163269	3.5	-0.222656	3.4	-0.171875	3.4	-0.229675	3.4	-0.0125122	3.4	-0.25	3.5	-0.181274	3.5	-0.140625
3.6	-0.167969	3.6	-0.222656	3.5	-0.183594	3.5	-0.232788	3.5	-0.00939941	3.5	-0.2547	3.6	-0.179688	3.6	-0.148438
3.7	-0.176575	3.7	-0.230469	3.6	-0.186707	3.6	-0.237488	3.6	-0.00469971	3.6	-0.25	3.7	-0.184387	3.7	-0.160156
3.8	-0.171875	3.8	-0.225769	3.7	-0.179688	3.7	-0.2453	3.7	-0.00469971	3.7	-0.261719	3.8	-0.1922	3.8	-0.167969
3.9	-0.1828	3.9	-0.230469	3.8	-0.191406	3.8	-0.2453	3.8	0.00701904	3.8	-0.28125	3.9	-0.1922	3.9	-0.167969
4	-0.199219	4	-0.230469	3.9	-0.207825	3.9	-0.252319	3.9	-0.00469971	3.9	-0.284363	4	-0.203918	4	-0.179688
4.1	-0.199219	4.1	-0.230469	4	-0.203125	4	-0.264832	4	-0.00469971	4	-0.289063	4.1	-0.207031	4.1	-0.199219
4.2	-0.1875	4.2	-0.230469	4.1	-0.210938	4.1	-0.264832	4.1	0.00701904	4.1	-0.308594	4.2	-0.200012	4.2	-0.199219
4.3	-0.179688	4.3	-0.238281	4.2	-0.217957	4.2	-0.269531	4.2	0.00701904	4.2	-0.320313	4.3	-0.208618	4.3	-0.210938
4.4	-0.167969	4.4	-0.238281	4.3	-0.21875	4.3	-0.27655	4.3	-0.00469971	4.3	-0.328125	4.4	-0.215637	4.4	-0.207825
4.5	-0.167969	4.5	-0.25	4.4	-0.230469	4.4	-0.27655	4.4	-0.00469971	4.4	-0.335144	4.5	-0.22345	4.5	-0.206238
4.6	-0.167969	4.6	-0.246887	4.5	-0.242188	4.5	-0.271851	4.5	-0.0125122	4.5	-0.335938	4.6	-0.235168	4.6	-0.210938
4.7	-0.167969	4.7	-0.242188	4.6	-0.258606	4.6	-0.28125	4.6	-0.0125122	4.6	-0.344543	4.7	-0.25	4.7	-0.210938
4.8	-0.160156	4.8	-0.230469	4.7	-0.261719	4.7	-0.296082	4.7	-0.00469971	4.7	-0.351563	4.8	-0.259399	4.8	-0.21875
4.9	-0.160156	4.9	-0.230469	4.8	-0.28125	4.8	-0.3078	4.8	-0.0125122	4.8	-0.363281	4.9	-0.262512	4.9	-0.227356
5	-0.160156	5	-0.230469	4.9	-0.299988	4.9	-0.322632	4.9	-0.024231	4.9	-0.371094	5	-0.274231	5	-0.230469
5.1	-0.172668	5.1	-0.242188	5	-0.320313	5	-0.323425	5	-0.024231	5	-0.398438	5.1	-0.293762	5.1	-0.25
5.2	-0.186707	5.2	-0.261719	5.1	-0.339844	5.1	-0.335144	5.1	-0.0437622	5.1	-0.417175	5.2	-0.308594	5.2	-0.273438
5.3	-0.203918	5.3	-0.269531	5.2	-0.351563	5.2	-0.346863	5.2	-0.0632935	5.2	-0.429688	5.3	-0.321106	5.3	-0.292969
5.4	-0.230469	5.4	-0.292969	5.3	-0.382813	5.3	-0.363281	5.3	-0.0945435	5.3	-0.4375	5.4	-0.332825	5.4	-0.323425
5.5	-0.261719	5.5	-0.300781	5.4	-0.402344	5.4	-0.378113	5.4	-0.114075	5.4	-0.453918	5.5	-0.352356	5.5	-0.356262
5.6	-0.28125	5.6	-0.320313	5.5	-0.421875	5.5	-0.385925	5.5	-0.153137	5.5	-0.46875	5.6	-0.364075	5.6	-0.393738
5.7	-0.320313	5.7	-0.339844	5.6	-0.441406	5.6	-0.412476	5.6	-0.195313	5.6	-0.492188	5.7	-0.383606	5.7	-0.429688
5.8	-0.351563	5.8	-0.371094	5.7	-0.460938	5.7	-0.417175	5.7	-0.231262	5.7	-0.4953	5.8	-0.391418	5.8	-0.449219
5.9	-0.366394	5.9	-0.390625	5.8	-0.460938	5.8	-0.424988	5.8	-0.262512	5.8	-0.507813	5.9	-0.407837	5.9	-0.480469
6	-0.390625	6	-0.410156	5.9	-0.480469	5.9	-0.441406	5.9	-0.301575	5.9	-0.527344	6	-0.403137	6	-0.5
6.1	-0.417969	6.1	-0.4328	6	-0.489075	6	-0.451538	6	-0.332825	6	-0.550781	6.1	-0.414856	6.1	-0.539063
6.2	-0.457031	6.2	-0.460938	6.1	-0.487488	6.1	-0.472656	6.1	-0.360168	6.1	-0.555481	6.2	-0.434387	6.2	-0.570313
6.3	-0.488281	6.3	-0.5	6.2	-0.492188	6.2	-0.479675	6.2	-0.391418	6.2	-0.5578	6.3	-0.453918	6.3	-0.589844
6.4	-0.507813	6.4	-0.524231	6.3	-0.511719	6.3	-0.499207	6.3	-0.422668	6.3	-0.558594	6.4	-0.465637	6.4	-0.617981
6.5	-0.516418	6.5	-0.5578	6.4	-0.523438	6.4	-0.502319	6.4	-0.450012	6.4	-0.570313	6.5	-0.480469	6.5	-0.640625
6.6	-0.53125	6.6	-0.558594	6.5	-0.53125	6.5	-0.507019	6.5	-0.485962	6.5	-0.589844	6.6	-0.492981	6.6	-0.655457
6.7	-0.550781	6.7	-0.578125	6.6	-0.550781	6.6	-0.514832	6.6	-0.512512	6.6	-0.609375	6.7	-0.512512	6.7	-0.679688
6.8	-0.582031	6.8	-0.614075	6.7	-0.547668	6.7	-0.546082	6.7	-0.543762	6.7	-0.628906	6.8	-0.532043	6.8	-0.699219
6.9	-0.609375	6.9	-0.652344	6.8	-0.5625	6.8	-0.572632	6.8	-0.575012	6.8	-0.635925	6.9	-0.551575	6.9	-0.71405
7	-0.628113	7	-0.671875	6.9	-0.59375	6.9	-0.585144	6.9	-0.614075	6.9	-0.648438	7	-0.582825	7	-0.738281
7.1	-0.628906	7.1	-0.691406	7	-0.608582	7	-0.604675	7	-0.645325	7	-0.675781	7.1	-0.602356	7.1	-0.774231
7.2	-0.660156	7.2	-0.742188	7.1	-0.625793	7.1	-0.632813	7.1	-0.672668	7.1	-0.707031	7.2	-0.614075	7.2	-0.820313
7.3	-0.710938	7.3	-0.78125	7.2	-0.664063	7.2	-0.655457	7.2	-0.707031	7.2	-0.757813	7.3	-0.633606	7.3	-0.859375
7.4	-0.75	7.4	-0.820313	7.3	-0.690613	7.3	-0.674988	7.3	-0.775024	7.3	-0.769531	7.4	-0.657837	7.4	-0.902344
7.5	-0.789063	7.5	-0.851563	7.4	-0.691406	7.4	-0.698425	7.4	-0.801575	7.4	-0.777344	7.5	-0.679688	7.5	-0.936707
7.6	-0.820313	7.6	-0.882813	7.5	-0.696106	7.5	-0.713257	7.5	-0.832825	7.5	-0.789063	7.6	-0.689087	7.6	-0.949219
7.7	-0.839844	7.7	-0.910156	7.6	-0.722656	7.6	-0.725769	7.6	-0.868774	7.6	-0.816406	7.7	-0.703918	7.7	-0.96875
7.8	-0.859375	7.8	-0.921875	7.7	-0.753906	7.7	-0.733582	7.7	-0.895325	7.7	-0.847656	7.8	-0.726563	7.8	-0.996887
7.9	-0.871094	7.9	-0.936707	7.8	-0.780457	7.8	-0.753113	7.8	-0.926575	7.8	-0.875793	7.9	-0.750793	7.9	-1.01172
8	-0.878906	8	-0.953918	7.9	-0.792969	7.9	-0.78125	7.9	-0.949219	7.9	-0.890625	8	-0.762512	8	-1.02655
8.1	-0.890625	8.1	-0.960938	8	-0.8125	8	-0.788269	8	-0.9422	8	-0.929688	8.1	-0.774231	8.1	-1.03125
8.2	-0.898438	8.2	-0.980469	8.1	-0.832031	8.1	-0.796082	8.1	-0.9422	8.1	-0.949219	8.2	-0.778931	8.2	-1.05859
8.3	-0.895325	8.3	-0.992188	8.2	-0.863281	8.2	-0.8078	8.2	-0.958618	8.2	-0.944519	8.3	-0.774231	8.3	-1.0672
8.4	-0.885925	8.4	-1	8.3	-0.878113	8.3	-0.810913	8.3	-0.953918	8.3	-0.953918	8.4	-0.78125	8.4	-1.0625
8.5	-0.890625	8.5	-1	8.4	-0.890625	8.4	-0.815613	8.4	-0.946106	8.4	-0.960938	8.5	-0.782043	8.5	-1.07031
8.6	-0.898438	8.6	-1.01172	8.5	-0.910156	8.5	-0.815613	8.5	-0.949219	8.5	-0.980469	8.6	-0.782043	8.6	-1.0578
8.7	-0.895325	8.7	-1.01172	8.6	-0.918762	8.6	-0.832031	8.6	-0.939087	8.6	-0.980469	8.7	-0.782043	8.7	-1.05859
8.8	-0.902344	8.8	-1.03125	8.7	-0.921875	8.7	-0.827332	8.7	-0.9375	8.7	-0.987488	8.8	-0.793762	8.8	-1.06561
8.9	-0.893738	8.9	-1.00702	8.8	-0.921875	8.8	-0.822632	8.8	-0.939087	8.8	-0.988281	8.9	-0.793762	8.9	-1.05548
9	-0.895325	9	-1.0047	8.9	-0.917175	8.9	-0.827332	8.9	-0.929688	8.9	-1	9	-0.801575	9	-1.03906
9.1	-0.902344	9.1	-0.992188	9	-0.921875	9	-0.830444	9	-0.929688	9	-1.0047	9.1	-0.813293	9.1	-1.03436
9.2	-0.921875	9.2	-0.980469	9.1	-0.921875	9.1	-0.842957	9.1	-0.927368	9.1	-1.00702	9.2	-0.837524	9.2	-1.04688
9.3	-0.941406	9.3	-0.987488	9.2	-0.929688	9.2	-0.839844	9.2	-0.934387	9.2	-1	9.3	-0.864075	9.3	-1.07501
9.4	-0.960938	9.4	-1	9.3	-0.929688	9.3	-0.854675	9.3	-0.949219	9.3	-0.996887	9.4	-0.875793	9.4	-1.08984
9.5	-0.967957	9.5	-1.00781	9.4	-0.929688	9.4	-0.878113	9.4	-0.946899	9.4	-0.967957	9.5	-0.883606	9.5	-1.10156
9.6	-0.949219	9.6	-1.01953	9.5	-0.910156	9.5	-0.897644	9.5	-0.914856	9.5	-0.949219	9.6	-0.895325	9.6	-1.06561
9.7	-0.921875	9.7	-0.988281	9.6	-0.871094	9.6	-0.905457	9.6	-0.898438	9.6	-0.917969	9.7	-0.875793	9.7	-1.05078
9.8	-0.885925	9.8	-0.96875	9.7	-0.832031	9.7	-0.873413	9.7	-0.864075	9.7	-0.890625	9.8	-0.847656	9.8	-1.03595
9.9	-0.867188	9.9	-0.949219	9.8	-0.800781	9.8	-0.854675	9.8	-0.825806	9.8	-0.859375	9.9	-0.832825	9.9	-1.01172
10	-0.847656	10	-0.941406	9.9	-0.761719	9.9	-0.839844	9.9	-0.808594	9.9	-0.815613	10	-0.832825	10	-0.972656
10.1	-0.836731	10.1	-0.914856	10	-0.730469	10	-0.842163	10	-0.790649	10	-0.777344	10.1	-0.832825	10.1	-0.956238
10.2	-0.823425	10.2	-0.897644	10.1	-0.719543	10.1	-0.835144	10.1	-0.789063	10.1	-0.746094	10.2	-0.837524	10.2	-0.946106
10.3	-0.8172	10.3	-0.867981	10.2	-0.695313	10.2	-0.820313	10.2	-0.798462	10.2	-0.735168	10.3	-0.832825	10.3	-0.902344
10.4	-0.800781	10.4	-0.858582	10.3	-0.683594	10.3	-0.796082	10.3	-0.805481	10.3	-0.71875	10.4	-0.832825	10.4	-0.905457
10.5	-0.78125	10.5	-0.832031	10.4	-0.683594	10.4	-0.788269	10.4	-0.800781	10.4	-0.710938	10.5	-0.825012	10.5	-0.874207
10.6	-0.769531	10.6	-0.784363	10.5	-0.664063	10.5	-0.752319	10.5	-0.801575	10.5	-0.706238	10.6	-0.825012	10.6	-0.844543
10.7	-0.761719	10.7	-0.75	10.6	-0.695313	10.6	-0.764832	10.6	-0.805481	10.6	-0.679688	10.7	-0.844543	10.7	-0.827332
10.8	-0.75	10.8	-0.738281	10.7	-0.683594	10.7	-0.761719	10.7	-0.774231	10.7	-0.6875	10.8	-0.844543	10.8	-0.789063
10.9	-0.75	10.9	-0.735168	10.8	-0.678894	10.8	-0.757019	10.8	-0.757813	10.8	-0.6875	10.9	-0.828125	10.9	-0.7547
11	-0.75	11	-0.703125	10.9	-0.671875	10.9	-0.752319	10.9	-0.727356	10.9	-0.699219	11	-0.825806	11	-0.7453
11.1	-0.75	11.1	-0.667175	11	-0.655457	11	-0.737488	11	-0.696106	11	-0.679688	11.1	-0.844543	11.1	-0.679688
11.2	-0.742188	11.2	-0.645325	11.1	-0.676575	11.1	-0.749207	11.1	-0.632813	11.1	-0.660156	11.2	-0.856262	11.2	-0.684387
11.3	-0.742188	11.3	-0.635925	11.2	-0.671875	11.2	-0.7453	11.2	-0.563293	11.2	-0.635925	11.3	-0.856262	11.3	-0.628113
11.4	-0.7453	11.4	-0.613281	11.3	-0.691406	11.3	-0.771851	11.3	-0.511719	11.3	-0.632813	11.4	-0.875793	11.4	-0.582031
11.5	-0.730469	11.5	-0.577332	11.4	-0.703125	11.4	-0.78125	11.4	-0.509399	11.4	-0.640625	11.5	-0.832031	11.5	-0.667175
11.6	-0.757813	11.6	-0.6297	11.5	-0.717957	11.5	-0.760132	11.5	-0.558594	11.5	-0.628906	11.6	-0.774231	11.6	-0.72345
11.7	-0.882813	11.7	-0.835144	11.6	-0.851563	11.6	-0.902344	11.6	-0.66095	11.6	-0.582031	11.7	-0.878906	11.7	-1.07111
11.8	-1.40546	11.8	-0.917969	11.7	-0.856262	11.7	-1.00702	11.7	-0.982056	11.7	-0.811707	11.8	-1.49298	11.8	-1.62421
11.9	-2.07111	11.9	-1.96564	11.8	-1.26874	11.8	-1.37421	11.8	-1.8172	11.8	-1.00079	11.9	-2.25549	11.9	-2.10547
12	-2.96564	12	-2.40314	11.9	-1.91016	11.9	-2.04608	11.9	-2.60706	11.9	-1.84766	12	-3.00861	12	-1.58282
12.1	-3.37891	12.1	-1.95233	12	-2.8172	12	-2.50781	12	-3.66095	12	-2.60547	12.1	-2.25549	12.1	2.48047
12.2	-1.92499	12.2	1.58905	12.1	-3.19141	12.1	-1.35779	12.1	-3.84064	12.1	-2.22656	12.2	1.75702	12.2	11.9609
12.3	1.83514	12.3	8.49689	12.2	-1.87421	12.2	3.21094	12.2	-2.04456	12.2	1.34686	12.3	9.4953	12.3	26.1281
12.4	7.17657	12.4	18.5734	12.3	1.62421	12.3	10.6305	12.3	2.01874	12.3	8.63281	12.4	20.2227	12.4	43.6969
12.5	13.8297	12.5	30.1805	12.4	7.46564	12.4	20.4149	12.4	8.90625	12.4	19.3398	12.5	33.0078	12.5	62.1203
12.6	21.5406	12.6	42.2406	12.5	15.4023	12.5	31.3844	12.5	18.0399	12.5	32.8594	12.6	47.1859	12.6	81.3367
12.7	29.9508	12.7	54.4984	12.6	25.3797	12.6	42.6844	12.6	29.5203	12.6	48.2719	12.7	62.5078	12.7	100.588
12.8	39.1383	12.8	67.1547	12.7	36.6922	12.7	54.5938	12.7	43.4898	12.7	65.5477	12.8	79.2	12.8	120.068
12.9	49.6953	12.9	79.9258	12.8	49.2148	12.8	66.6992	12.8	59.6563	12.8	84.1844	12.9	97.1226	12.9	140.223
13	61.0883	13	93.1461	12.9	63.9328	12.9	79.7946	12.9	78.1273	12.9	104.677	13	115.802	13	157.683
13.1	70.1609	13.1	101.521	13	80.0804	13	91.9344	13	98.3789	13	126.349	13.1	129.47	13.1	160.598
13.2	72.5406	13.2	95.7125	13.1	97.0313	13.1	97.4219	13.1	118.63	13.1	145.716	13.2	131.257	13.2	139.584
13.3	67.9656	13.3	74.5867	13.2	111.289	13.2	89.5789	13.2	136.424	13.2	154.983	13.3	122.234	13.3	105.105
13.4	61.4422	13.4	49.4531	13.3	122.07	13.3	71.8351	13.3	151.187	13.3	153.298	13.4	110.403	13.4	73.0695
13.5	55.7031	13.5	28.9727	13.4	129.568	13.4	53.9868	13.4	162.705	13.4	147.131	13.5	100.967	13.5	49.3594
13.6	50.9196	13.6	14.4992	13.5	134.836	13.5	40.0774	13.5	170.905	13.5	141.851	13.6	93.8797	13.6	32.3812
13.7	45.9109	13.7	4.80078	13.6	138.064	13.6	30.1633	13.6	176.302	13.6	138.052	13.7	87.1758	13.7	20.3414
13.8	41.0625	13.8	-2.12189	13.7	139.396	13.7	23.1336	13.7	179.666	13.7	135.106	13.8	81.5172	13.8	11.6297
13.9	36.1266	13.9	-7.04922	13.8	139.296	13.8	17.6891	13.8	180.92	13.8	132.265	13.9	76.0023	13.9	4.99609
14	31.432	14	-10.4828	13.9	138.149	13.9	13.5125	13.9	180.655	13.9	129.171	14	70.0961	14	-0.203125
14.1	26.5445	14.1	-13.0461	14	136.093	14	10.593	14	179.233	14	125.819	14.1	64.2305	14.1	-3.9039
14.2	21.5242	14.2	-15.1516	14.1	133.534	14.1	7.96564	14.1	177.257	14.1	122.192	14.2	58.1719	14.2	-6.91486
14.3	16.9383	14.3	-16.7164	14.2	130.341	14.2	6.08127	14.2	175.057	14.2	118.259	14.3	52.3882	14.3	-9.09296
14.4	11.9945	14.4	-17.7422	14.3	127.01	14.3	4.42346	14.3	172.643	14.3	114.398	14.4	46.4141	14.4	-10.5734
14.5	7.30078	14.5	-18.3141	14.4	123.563	14.4	3.47815	14.4	170.166	14.4	110.365	14.5	41.1359	14.5	-11.9359
14.6	3.18906	14.6	-18.6156	14.5	119.853	14.5	2.75705	14.5	167.668	14.5	106.419	14.6	35.864	14.6	-12.5766
14.7	-0.614838	14.7	-18.7922	14.6	116.001	14.6	2.25549	14.6	165.022	14.6	102.091	14.7	30.6531	14.7	-13.0203
14.8	-4.32111	14.8	-18.7742	14.7	112.335	14.7	2.01172	14.7	162.516	14.7	98.0867	14.8	25.8187	14.8	-12.8922
14.9	-7.66876	14.9	-18.5617	14.8	108.638	14.8	1.83517	14.8	160.366	14.8	94.0898	14.9	21.1898	14.9	-12.8641
15	-10.8351	15	-18.2805	14.9	104.8	14.9	1.90234	14.9	158.202	14.9	90.0711	15	16.6875	15	-12.5266
15.1	-14.1203	15.1	-18.0141	15	100.819	15	1.89297	15	156.386	15	86.4281	15.1	12.3516	15.1	-11.8906
15.2	-16.8328	15.2	-17.5438	15.1	97.3406	15.1	2.41956	15.1	154.759	15.1	82.3258	15.2	8.44217	15.2	-11.2531
15.3	-19.2609	15.3	-16.9055	15.2	93.2125	15.2	2.67657	15.2	153.417	15.2	78.9258	15.3	4.53827	15.3	-10.5086
15.4	-21.7211	15.4	-16.4859	15.3	89.468	15.3	3.18909	15.3	152.337	15.3	74.8008	15.4	0.775757	15.4	-9.79453
15.5	-24.0891	15.5	-15.7641	15.4	85.7601	15.4	3.49533	15.4	151.398	15.4	71.0617	15.5	-2.91565	15.5	-9.01953
15.6	-26.3539	15.6	-15.0727	15.5	82.2633	15.5	3.93829	15.5	150.733	15.5	67.1898	15.6	-5.93674	15.6	-7.84686
15.7	-28.2687	15.7	-14.6148	15.6	78.5836	15.6	4.39063	15.6	150.436	15.6	63.4977	15.7	-9.22815	15.7	-7.05078
15.8	-30.2172	15.8	-13.9922	15.7	75.275	15.7	5.10782	15.7	150.445	15.7	59.8984	15.8	-12.0836	15.8	-6.03751
15.9	-31.9359	15.9	-13.3234	15.8	72.0406	15.8	5.67502	15.8	150.619	15.8	55.9617	15.9	-14.875	15.9	-5.26718
16	-33.2625	16	-12.6812	15.9	68.5898	15.9	5.94611	15.9	150.926	15.9	52.2742	16	-17.5984	16	-4.32266
16.1	-34.8391	16.1	-12.0547	16	65.4852	16	6.43359	16	151.612	16	48.7023	16.1	-20.3883	16.1	-3.27188
16.2	-36.3102	16.2	-11.4836	16.1	62.5531	16.1	7.02267	16.1	152.646	16.1	45.0797	16.2	-22.8281	16.2	-2.38281
16.3	-37.6047	16.3	-10.8578	16.2	59.7946	16.2	7.46017	16.2	153.902	16.2	41.5453	16.3	-24.9719	16.3	-1.63672
16.4	-38.8117	16.4	-10.4625	16.3	57.1586	16.3	7.8219	16.3	155.448	16.3	38.0047	16.4	-27.4149	16.4	-0.819519
16.5	-39.9562	16.5	-9.92578	16.4	54.264	16.4	8.21329	16.4	157.173	16.4	34.782	16.5	-29.6625	16.5	0.272644
16.6	-40.8242	16.6	-9.30939	16.5	51.7664	16.5	8.58829	16.5	159.017	16.5	31.4172	16.6	-31.7578	16.6	0.8172
16.7	-41.7828	16.7	-8.75	16.6	49.3851	16.6	9.07581	16.6	161.297	16.6	28.0234	16.7	-33.7117	16.7	1.67734
16.8	-42.8625	16.8	-8.2836	16.7	47.1016	16.7	9.70392	16.7	163.869	16.7	24.607	16.8	-35.6555	16.8	2.50626
16.9	-43.6024	16.9	-7.73749	16.8	45.05	16.8	10.1617	16.8	166.73	16.8	21.3203	16.9	-37.4219	16.9	3.06796
17	-44.232	17	-7.44843	16.9	43.3383	16.9	10.5992	16.9	170.015	16.9	18.1383	17	-39.0258	17	3.67499
17.1	-44.9547	17.1	-7.07968	17	41.6774	17	10.9625	17	173.521	17	15.0805	17.1	-40.5156	17.1	4.18594
17.2	-45.6102	17.2	-6.67813	17.1	40.2453	17.1	11.2274	17.1	177.098	17.1	12.0547	17.2	-41.925	17.2	4.63437
17.3	-46.1633	17.3	-6.31094	17.2	38.9805	17.2	11.4469	17.2	181.032	17.2	9.23907	17.3	-43.3406	17.3	5.16718
17.4	-46.7734	17.4	-5.91171	17.3	37.9367	17.3	11.7133	17.3	185.369	17.3	6.24454	17.4	-45.0117	17.4	5.86719
17.5	-47.2977	17.5	-5.60312	17.4	36.9586	17.4	11.986	17.4	190.107	17.4	3.38126	17.5	-46.5563	17.5	6.42267
17.6	-47.8219	17.6	-5.27109	17.5	36.1117	17.5	12.2953	17.5	195.213	17.5	0.614838	17.6	-47.8406	17.6	6.87265
17.7	-48.3789	17.7	-5.00626	17.6	35.5336	17.6	12.5625	17.6	200.538	17.6	-1.84375	17.7	-49.0914	17.7	7.30624
17.8	-48.8164	17.8	-4.72266	17.7	34.8945	17.7	12.8	17.7	205.905	17.7	-4.11249	17.8	-50.268	17.8	7.71173
17.9	-49.2125	17.9	-4.39218	17.8	34.4758	17.8	13.0227	17.8	211.642	17.8	-6.48438	17.9	-51.218	17.9	8.14609
18	-49.5547	18	-4.17578	17.9	34.3094	17.9	13.2289	17.9	217.35	17.9	-8.86093	18	-52.075	18	8.60703
18.1	-49.8687	18.1	-3.94611	18	34.2438	18	13.4453	18	223.929	18	-10.968	18.1	-53.3281	18.1	8.88046
18.2	-50.1187	18.2	-3.73907	18.1	34.4266	18.1	13.6156	18.1	230.648	18.1	-12.9023	18.2	-54.5266	18.2	9.14688
18.3	-50.4352	18.3	-3.54453	18.2	34.8375	18.2	13.8117	18.2	237.573	18.2	-14.8648	18.3	-55.1766	18.3	9.47421
18.4	-50.7539	18.4	-3.39923	18.3	35.3742	18.3	14.0031	18.3	244.829	18.3	-16.5133	18.4	-56.3086	18.4	9.72891
18.5	-50.9977	18.5	-3.21014	18.4	36.1351	18.4	14.132	18.4	252.2	18.4	-17.9898	18.5	-57.2031	18.5	9.95157
18.6	-51.2484	18.6	-3.00861	18.5	37.0078	18.5	14.2875	18.5	259.79	18.5	-19.3234	18.6	-58.0766	18.6	10.225
18.7	-51.4461	18.7	-2.86798	18.6	37.9992	18.6	14.418	18.6	267.693	18.6	-20.432	18.7	-58.7586	18.7	10.482
18.8	-51.6695	18.8	-2.75079	18.7	39.4305	18.7	14.6094	18.7	275.886	18.7	-21.4711	18.8	-59.3719	18.8	10.7148
18.9	-51.8633	18.9	-2.61328	18.8	40.9461	18.8	14.7922	18.8	284.382	18.8	-22.4891	18.9	-60.0305	18.9	10.9195
19	-52.0406	19	-2.49609	18.9	42.7367	18.9	14.9609	18.9	293.136	18.9	-23.3273	19	-60.6789	19	11.1625
19.1	-52.2648	19.1	-2.34845	19	44.7578	19	15.0438	19	302.156	19	-23.8961	19.1	-61.4023	19.1	11.3703
19.2	-52.4508	19.2	-2.21954	19.1	47.1008	19.1	15.136	19.1	311.409	19.1	-24.4109	19.2	-62.1227	19.2	11.55
19.3	-52.6586	19.3	-2.08673	19.2	49.6852	19.2	15.2063	19.2	320.747	19.2	-24.7234	19.3	-62.8063	19.3	11.7133
19.4	-52.8805	19.4	-1.94141	19.3	52.5773	19.3	15.282	19.3	330.392	19.3	-24.7586	19.4	-63.4531	19.4	11.8734
19.5	-53.0047	19.5	-1.82813	19.4	55.7609	19.4	15.4102	19.4	340.318	19.4	-24.6117	19.5	-63.9492	19.5	12.0101
19.6	-53.0672	19.6	-1.71484	19.5	59.2461	19.5	15.4914	19.5	350.166	19.5	-24.3742	19.6	-64.4344	19.6	12.1672
19.7	-53.1172	19.7	-1.59766	19.6	62.8461	19.6	15.5703	19.6	360.276	19.6	-24.0562	19.7	-64.9086	19.7	12.3391
19.8	-53.2195	19.8	-1.48126	19.7	66.8703	19.7	15.6289	19.7	370.741	19.7	-23.4508	19.8	-65.4531	19.8	12.4758
19.9	-53.1367	19.9	-1.37891	19.8	71.2461	19.8	15.7109	19.8	381.38	19.8	-22.6055	19.9	-65.9305	19.9	12.5992
20	-53.082	20	-1.27423	19.9	75.7656	19.9	15.7578	19.9	392.226	19.9	-21.5883	20	-66.432	20	12.7141
20.1	-53.2648	20.1	-1.17969	20	80.6492	20	15.8235	20	403.16	20	-20.3305	20.1	-66.9063	20.1	12.8304
20.2	-53.332	20.2	-1.08984	20.1	85.6945	20.1	15.8984	20.1	414.34	20.1	-19.0812	20.2	-67.3211	20.2	12.9297
20.3	-53.4297	20.3	-1.01642	20.2	91.1078	20.2	15.9531	20.2	425.774	20.2	-17.782	20.3	-67.7156	20.3	13.0266
20.4	-53.4523	20.4	-0.924988	20.3	96.9063	20.3	16.032	20.3	437.308	20.3	-15.8976	20.4	-68.0977	20.4	13.1359
20.5	-53.4984	20.5	-0.844543	20.4	103.011	20.4	16.1055	20.4	449.059	20.4	-13.8883	20.5	-68.4445	20.5	13.2289
20.6	-53.5031	20.6	-0.753113	20.5	109.313	20.5	16.1602	20.5	460.862	20.5	-11.7008	20.6	-68.8672	20.6	13.3234
20.7	-53.5375	20.7	-0.703918	20.6	115.98	20.6	16.2266	20.6	472.718	20.6	-9.44376	20.7	-69.2453	20.7	13.4133
20.8	-53.5305	20.8	-0.640625	20.7	122.713	20.7	16.2922	20.7	484.85	20.7	-6.91718	20.8	-69.6117	20.8	13.5109
20.9	-53.5492	20.9	-0.570313	20.8	129.782	20.8	16.3484	20.8	497.365	20.8	-4.31329	20.9	-69.9821	20.9	13.6047
21	-53.5148	21	-0.5047	20.9	136.903	20.9	16.3945	20.9	509.937	20.9	-1.33124	21	-70.2477	21	13.6953
21.1	-53.5562	21.1	-0.456238	21	144.303	21	16.4453	21	522.294	21	1.62579	21.1	-70.4656	21.1	13.7922
21.2	-53.557	21.2	-0.40625	21.1	151.829	21.1	16.5008	21.1	535.107	21.1	5.05859	21.2	-70.7625	21.2	13.8695
21.3	-53.5492	21.3	-0.386719	21.2	159.61	21.2	16.5352	21.2	547.933	21.2	8.79767	21.3	-71.1266	21.3	13.9383
21.4	-53.5203	21.4	-0.352356	21.3	167.532	21.3	16.5859	21.3	560.99	21.3	12.5125	21.4	-71.4742	21.4	14.0422
21.5	-53.4594	21.5	-0.320313	21.4	175.531	21.4	16.6133	21.4	574.131	21.4	16.3398	21.5	-71.8297	21.5	14.1273
21.6	-53.4586	21.6	-0.28595	21.5	183.655	21.5	16.6445	21.5	587.257	21.5	20.4266	21.6	-72.1234	21.6	14.1641
21.7	-53.4352	21.7	-0.257019	21.6	191.805	21.6	16.6758	21.6	600.505	21.6	24.8953	21.7	-72.2773	21.7	14.2266
21.8	-53.3836	21.8	-0.196106	21.7	200.068	21.7	16.7078	21.7	614.009	21.7	29.5625	21.8	-72.4602	21.8	14.2758
21.9	-53.3414	21.9	-0.155457	21.8	208.356	21.8	16.7422	21.8	627.626	21.8	34.3781	21.9	-72.6484	21.9	14.3
22	-53.2664	22	-0.125793	21.9	216.687	21.9	16.7703	21.9	641.106	21.9	39.4133	22	-72.8235	22	14.3391
22.1	-53.1883	22.1	-0.104675	22	225.059	22	16.7969	22	654.741	22	44.7289	22.1	-73.0891	22.1	14.3672
22.2	-53.1148	22.2	-0.0828247	22.1	233.427	22.1	16.8359	22.1	668.702	22.1	50.2391	22.2	-73.3344	22.2	14.3867
22.3	-53.0313	22.3	-0.0703125	22.2	242.002	22.2	16.868	22.2	682.601	22.2	55.8937	22.3	-73.4789	22.3	14.4476
22.4	-52.9937	22.4	-0.03125	22.3	250.55	22.3	16.9188	22.3	696.543	22.3	61.8328	22.4	-73.6078	22.4	14.4758
22.5	-52.9109	22.5	-0.00469971	22.4	258.898	22.4	16.9367	22.4	710.577	22.4	67.9149	22.5	-73.7555	22.5	14.4992
22.6	-52.8047	22.6	0.024231	22.5	267.203	22.5	16.9899	22.5	724.737	22.5	74.4398	22.6	-73.861	22.6	14.5664
22.7	-52.7274	22.7	0.0460815	22.6	275.529	22.6	17.05	22.6	738.727	22.6	80.7867	22.7	-73.9227	22.7	14.6172
22.8	-52.6812	22.8	0.0750122	22.7	284.002	22.7	17.0672	22.7	752.934	22.7	87.8836	22.8	-74.0375	22.8	14.6828
22.9	-52.6641	22.9	0.0968628	22.8	292.207	22.8	17.0867	22.8	767.112	22.8	94.9406	22.9	-74.2703	22.9	14.7336
23	-52.5984	23	0.106262	22.9	300.313	22.9	17.1219	22.9	781.555	22.9	102.186	23	-74.4305	23	14.7844
23.1	-52.5281	23.1	0.116394	23	308.367	23	17.1172	23	795.873	23	109.687	23.1	-74.5438	23.1	14.8273
23.2	-52.4023	23.2	0.116394	23.1	316.509	23.1	17.118	23.1	810.19	23.1	117.254	23.2	-74.6774	23.2	14.8867
23.3	-52.332	23.3	0.133606	23.2	324.595	23.2	17.1477	23.2	824.555	23.2	125.345	23.3	-74.8016	23.3	14.9164
23.4	-52.2422	23.4	0.143738	23.3	332.299	23.3	17.1961	23.3	838.967	23.3	133.584	23.4	-74.8945	23.4	14.9219
23.5	-52.1398	23.5	0.164856	23.4	340.307	23.4	17.2117	23.4	853.199	23.4	141.844	23.5	-74.9969	23.5	14.9648
23.6	-52.0555	23.6	0.174988	23.5	347.589	23.5	17.2195	23.5	867.507	23.5	150.398	23.6	-75.2336	23.6	14.975
23.7	-51.9797	23.7	0.179688	23.6	355.116	23.6	17.2461	23.6	881.893	23.6	159.19	23.7	-75.3281	23.7	14.9766
23.8	-51.8719	23.8	0.196106	23.7	362.312	23.7	17.2391	23.7	896.462	23.7	167.994	23.8	-75.4211	23.8	14.9914
23.9	-51.7492	23.9	0.217957	23.8	369.649	23.8	17.2414	23.8	910.736	23.8	177.026	23.9	-75.5125	23.9	14.9992
24	-51.6445	24	0.225769	23.9	376.785	23.9	17.2148	23.9	924.998	23.9	186.115	24	-75.5813	24	15.0039
24.1	-51.5664	24.1	0.235168	24	383.934	24	17.2078	24	939.413	24	195.455	24.1	-75.6008	24.1	15.0399
24.2	-51.4641	24.2	0.242188	24.1	390.819	24.1	17.2227	24.1	953.653	24.1	205.263	24.2	-75.6039	24.2	15.0765
24.3	-51.3625	24.3	0.2453	24.2	397.497	24.2	17.2508	24.2	967.564	24.2	215.234	24.3	-75.6992	24.3	15.0938
24.4	-51.2726	24.4	0.2547	24.3	404.1	24.3	17.2539	24.3	981.926	24.3	225.169	24.4	-75.7953	24.4	15.1203
24.5	-51.168	24.5	0.264832	24.4	410.827	24.4	17.2734	24.4	996.182	24.4	235.102	24.5	-75.8656	24.5	15.1375
24.6	-51.0344	24.6	0.261719	24.5	417.17	24.5	17.2703	24.5	1010.26	24.5	245.251	24.6	-75.9766	24.6	15.1828
24.7	-50.9297	24.7	0.257813	24.6	423.502	24.6	17.2734	24.6	1024.08	24.6	255.752	24.7	-76.1078	24.7	15.2375
24.8	-50.8109	24.8	0.27655	24.7	429.514	24.7	17.2539	24.7	1038.09	24.7	266.277	24.8	-76.1781	24.8	15.2805
24.9	-50.6828	24.9	0.277344	24.8	435.612	24.8	17.2586	24.8	1051.89	24.8	276.891	24.9	-76.2172	24.9	15.293
25	-50.5781	25	0.293762	24.9	441.335	24.9	17.25	24.9	1065.54	24.9	287.673	25	-76.2789	25	15.3
25.1	-50.4844	25.1	0.300781	25	447.109	25	17.2586	25	1079.36	25	298.553	25.1	-76.3117	25.1	15.3273
25.2	-50.3375	25.2	0.315613	25.1	452.827	25.1	17.2703	25.1	1093.12	25.1	309.53	25.2	-76.361	25.2	15.3516
25.3	-50.1945	25.3	0.325012	25.2	458.187	25.2	17.293	25.2	1106.57	25.2	320.673	25.3	-76.4	25.3	15.3633
25.4	-50.0656	25.4	0.327332	25.3	463.628	25.3	17.3094	25.3	1119.97	25.3	331.899	25.4	-76.4328	25.4	15.3703
25.5	-49.9562	25.5	0.336731	25.4	468.718	25.4	17.3242	25.4	1133.23	25.4	343.17	25.5	-76.4578	25.5	15.3781
25.6	-49.8312	25.6	0.346863	25.5	473.745	25.5	17.3484	25.5	1146.5	25.5	354.55	25.6	-76.4828	25.6	15.3711
25.7	-49.7227	25.7	0.347656	25.6	478.797	25.6	17.368	25.6	1159.67	25.6	365.98	25.7	-76.5219	25.7	15.375
25.8	-49.5961	25.8	0.351563	25.7	483.804	25.7	17.3703	25.7	1172.81	25.7	377.578	25.8	-76.5242	25.8	15.3945
25.9	-49.4719	25.9	0.359375	25.8	488.258	25.8	17.3758	25.8	1185.78	25.8	389.432	25.9	-76.5219	25.9	15.3976
26	-49.3539	26	0.374207	25.9	492.859	25.9	17.407	25.9	1198.46	25.9	401.105	26	-76.493	26	15.4211
26.1	-49.225	26.1	0.375793	26	497.379	26	17.4266	26	1211.33	26	412.708	26.1	-76.443	26.1	15.4219
26.2	-49.0938	26.2	0.374207	26.1	501.723	26.1	17.4797	26.1	1224.04	26.1	424.343	26.2	-76.4305	26.2	15.4336
26.3	-48.9742	26.3	0.375793	26.2	506.172	26.2	17.5094	26.2	1236.69	26.2	436.244	26.3	-76.4336	26.3	15.4531
26.4	-48.8555	26.4	0.390625	26.3	510.227	26.3	17.5117	26.3	1248.82	26.3	448.238	26.4	-76.4164	26.4	15.4992
26.5	-48.7172	26.5	0.405457	26.4	514.341	26.4	17.5164	26.4	1261.06	26.4	460.129	26.5	-76.4336	26.5	15.5187
26.6	-48.5648	26.6	0.414856	26.5	518.302	26.5	17.5203	26.5	1273.11	26.5	472.089	26.6	-76.4578	26.6	15.543
26.7	-48.4438	26.7	0.405457	26.6	522.141	26.6	17.5234	26.6	1285.22	26.6	484.12	26.7	-76.4742	26.7	15.5578
26.8	-48.3117	26.8	0.410156	26.7	526.138	26.7	17.5281	26.7	1297.14	26.7	496.193	26.8	-76.4891	26.8	15.5867
26.9	-48.1711	26.9	0.410156	26.8	529.516	26.8	17.5313	26.8	1308.95	26.8	508.197	26.9	-76.5008	26.9	15.6281
27	-48.0492	27	0.410156	26.9	533.056	26.9	17.5477	26.9	1320.65	26.9	520.207	27	-76.5313	27	15.6281
27.1	-47.9281	27.1	0.405457	27	536.524	27	17.5594	27	1332.13	27	532.188	27.1	-76.5961	27.1	15.6375
27.2	-47.807	27.2	0.414856	27.1	540.098	27.1	17.5695	27.1	1343.44	27.1	544.064	27.2	-76.6133	27.2	15.6594
27.3	-47.6906	27.3	0.405457	27.2	543.367	27.2	17.575	27.2	1354.73	27.2	556.084	27.3	-76.5969	27.3	15.6789
27.4	-47.5531	27.4	0.407043	27.3	546.412	27.3	17.5672	27.3	1365.91	27.3	568.146	27.4	-76.5789	27.4	15.6914
27.5	-47.3961	27.5	0.405457	27.4	549.521	27.4	17.582	27.4	1376.92	27.4	580.16	27.5	-76.582	27.5	15.7148
27.6	-47.2602	27.6	0.405457	27.5	552.67	27.5	17.5867	27.5	1387.58	27.5	591.886	27.6	-76.5898	27.6	15.718
27.7	-47.1359	27.7	0.395325	27.6	555.544	27.6	17.6016	27.6	1398.31	27.6	603.811	27.7	-76.582	27.7	15.7227
27.8	-47.0055	27.8	0.398438	27.7	558.424	27.7	17.611	27.7	1408.76	27.7	615.777	27.8	-76.5789	27.8	15.7375
27.9	-46.8813	27.9	0.410156	27.8	561.255	27.8	17.6297	27.8	1419.25	27.8	627.699	27.9	-76.5813	27.9	15.7617
28	-46.7453	28	0.424988	27.9	563.939	27.9	17.6523	27.9	1429.58	27.9	639.441	28	-76.6133	28	15.7766
28.1	-46.607	28.1	0.414856	28	566.627	28	17.6523	28	1439.68	28	651.235	28.1	-76.6375	28.1	15.7899
28.2	-46.4633	28.2	0.417175	28.1	569.248	28.1	17.6492	28.1	1449.75	28.1	663.107	28.2	-76.6445	28.2	15.7953
28.3	-46.3227	28.3	0.417969	28.2	571.767	28.2	17.6688	28.2	1459.68	28.2	674.802	28.3	-76.6594	28.3	15.7977
28.4	-46.1969	28.4	0.417969	28.3	574.146	28.3	17.6867	28.3	1469.4	28.3	686.498	28.4	-76.6367	28.4	15.8195
28.5	-46.0578	28.5	0.426575	28.4	576.522	28.4	17.7008	28.4	1479.05	28.4	698.063	28.5	-76.632	28.5	15.8359
28.6	-45.932	28.6	0.424988	28.5	578.794	28.5	17.7274	28.5	1488.47	28.5	709.503	28.6	-76.6172	28.6	15.8344
28.7	-45.7906	28.7	0.417969	28.6	581.107	28.6	17.7617	28.6	1497.83	28.6	721.148	28.7	-76.5977	28.7	15.8367
28.8	-45.6383	28.8	0.426575	28.7	583.303	28.7	17.7664	28.7	1506.92	28.7	732.598	28.8	-76.6172	28.8	15.8469
28.9	-45.4781	28.9	0.417175	28.8	585.478	28.8	17.7813	28.8	1515.98	28.8	744.187	28.9	-76.6078	28.9	15.8633
29	-45.3227	29	0.413269	28.9	587.559	28.9	17.7899	28.9	1524.79	28.9	755.536	29	-76.5656	29	15.8555
29.1	-45.182	29.1	0.40625	29	589.6	29	17.793	29	1533.61	29	766.852	29.1	-76.5313	29.1	15.8586
29.2	-45.0484	29.2	0.417969	29.1	591.569	29.1	17.7977	29.1	1542.31	29.1	778.017	29.2	-76.4875	29.2	15.8711
29.3	-44.8937	29.3	0.410156	29.2	593.498	29.2	17.8094	29.2	1550.67	29.2	789.056	29.3	-76.4367	29.3	15.8703
29.4	-44.7641	29.4	0.395325	29.3	595.408	29.3	17.8242	29.3	1559.25	29.3	800.364	29.4	-76.393	29.4	15.8469
29.5	-44.6305	29.5	0.393738	29.4	597.255	29.4	17.8289	29.4	1567.6	29.4	811.541	29.5	-76.3742	29.5	15.8484
29.6	-44.4859	29.6	0.383606	29.5	599.12	29.5	17.8563	29.5	1575.52	29.5	822.291	29.6	-76.3547	29.6	15.8586
29.7	-44.318	29.7	0.385925	29.6	600.943	29.6	17.8711	29.6	1583.43	29.6	833.101	29.7	-76.3352	29.7	15.8633
29.8	-44.1867	29.8	0.375793	29.7	602.678	29.7	17.8875	29.7	1591.3	29.7	843.709	29.8	-76.3	29.8	15.875
29.9	-44.0562	29.9	0.378113	29.8	604.338	29.8	17.8781	29.8	1599.03	29.8	854.457	29.9	-76.2414	29.9	15.8656
30	-43.9242	30	0.374207	29.9	605.931	29.9	17.8727	29.9	1606.7	29.9	864.94	30	-76.1742	30	15.868
30.1	-43.7602	30.1	0.364075	30	607.455	30	17.8711	30	1614.29	30	875.446	30.1	-76.132	30.1	15.875
30.2	-43.5672	30.2	0.371094	30.1	608.984	30.1	17.868	30.1	1621.52	30.1	885.969	30.2	-76.1156	30.2	15.8898
30.3	-43.4078	30.3	0.374207	30.2	610.482	30.2	17.868	30.2	1628.7	30.2	896.376	30.3	-76.0852	30.3	15.8976
30.4	-43.268	30.4	0.364075	30.3	611.979	30.3	17.868	30.3	1636.07	30.3	906.727	30.4	-76.057	30.4	15.9102
30.5	-43.0953	30.5	0.371094	30.4	613.451	30.4	17.8633	30.4	1642.93	30.4	916.989	30.5	-76.0297	30.5	15.9219
30.6	-42.9344	30.6	0.366394	30.5	614.96	30.5	17.8711	30.5	1649.78	30.5	926.981	30.6	-75.9664	30.6	15.9453
30.7	-42.8	30.7	0.359375	30.6	616.392	30.6	17.8953	30.6	1656.65	30.6	936.969	30.7	-75.886	30.7	15.9367
30.8	-42.6539	30.8	0.364075	30.7	617.737	30.7	17.8992	30.7	1663.39	30.7	946.992	30.8	-75.8063	30.8	15.9336
30.9	-42.4937	30.9	0.354675	30.8	618.987	30.8	17.8828	30.8	1669.84	30.8	956.951	30.9	-75.7484	30.9	15.9414
31	-42.3414	31	0.359375	30.9	620.259	30.9	17.8906	30.9	1676.16	30.9	966.525	31	-75.7172	31	15.9601
31.1	-42.2086	31.1	0.354675	31	621.495	31	17.8805	31	1682.48	31	976.24	31.1	-75.6711	31.1	15.9805
31.2	-42.0844	31.2	0.344543	31.1	622.717	31.1	17.8875	31.1	1688.83	31.1	985.696	31.2	-75.6234	31.2	16.007
31.3	-41.9703	31.3	0.351563	31.2	623.9	31.2	17.8992	31.2	1695.11	31.2	995.017	31.3	-75.5367	31.3	16.0117
31.4	-41.8586	31.4	0.346863	31.3	625.109	31.3	17.886	31.3	1701.07	31.3	1004.34	31.4	-75.4594	31.4	16.0383
31.5	-41.732	31.5	0.344543	31.4	626.31	31.4	17.8922	31.4	1707.01	31.4	1013.61	31.5	-75.3938	31.5	16.0547
31.6	-41.6063	31.6	0.339844	31.5	627.429	31.5	17.8828	31.5	1712.9	31.5	1022.9	31.6	-75.361	31.6	16.0508
31.7	-41.4672	31.7	0.335144	31.6	628.451	31.6	17.8906	31.6	1718.69	31.6	1031.87	31.7	-75.3195	31.7	16.0656
31.8	-41.3414	31.8	0.336731	31.7	629.502	31.7	17.8836	31.7	1724.08	31.7	1040.81	31.8	-75.2352	31.8	16.082
31.9	-41.1773	31.9	0.327332	31.8	630.553	31.8	17.8922	31.8	1729.48	31.8	1049.72	31.9	-75.1305	31.9	16.0984
32	-41.0203	32	0.328125	31.9	631.609	31.9	17.9023	31.9	1734.94	31.9	1058.45	32	-75.0375	32	16.1008
32.1	-40.8578	32.1	0.336731	32	632.655	32	17.907	32	1740.31	32	1067.14	32.1	-74.9398	32.1	16.1086
32.2	-40.7195	32.2	0.327332	32.1	633.705	32.1	17.9141	32.1	1745.53	32.1	1075.67	32.2	-74.868	32.2	16.1102
32.3	-40.5562	32.3	0.320313	32.2	634.687	32.2	17.9266	32.2	1750.72	32.2	1084.14	32.3	-74.8188	32.3	16.1086
32.4	-40.4078	32.4	0.323425	32.3	635.607	32.3	17.9344	32.3	1755.88	32.3	1092.59	32.4	-74.8274	32.4	16.1133
32.5	-40.2359	32.5	0.328125	32.4	636.551	32.4	17.9414	32.4	1760.86	32.4	1100.9	32.5	-74.7906	32.5	16.1281
32.6	-40.0984	32.6	0.325012	32.5	637.498	32.5	17.9461	32.5	1765.85	32.5	1109.26	32.6	-74.7321	32.6	16.1328
32.7	-39.943	32.7	0.315613	32.6	638.413	32.6	17.9578	32.6	1770.55	32.6	1117.28	32.7	-74.6891	32.7	16.1523
32.8	-39.8219	32.8	0.305481	32.7	639.327	32.7	17.9609	32.7	1775.29	32.7	1125.19	32.8	-74.6477	32.8	16.1719
32.9	-39.6977	32.9	0.308594	32.8	640.245	32.8	17.9625	32.8	1779.88	32.8	1133.01	32.9	-74.5984	32.9	16.1906
33	-39.5523	33	0.315613	32.9	641.084	32.9	17.9531	32.9	1784.5	32.9	1140.72	33	-74.5453	33	16.1867
33.1	-39.4109	33.1	0.3125	33	641.932	33	17.9609	33	1788.97	33	1148.39	33.1	-74.5063	33.1	16.2031
33.2	-39.2711	33.2	0.308594	33.1	642.752	33.1	17.9625	33.1	1793.41	33.1	1156.03	33.2	-74.4578	33.2	16.2227
33.3	-39.1344	33.3	0.305481	33.2	643.546	33.2	17.9531	33.2	1797.62	33.2	1163.71	33.3	-74.3805	33.3	16.2422
33.4	-38.9867	33.4	0.296082	33.3	644.323	33.3	17.9656	33.3	1801.86	33.3	1171.01	33.4	-74.2992	33.4	16.257
33.5	-38.8406	33.5	0.296082	33.4	645.112	33.4	17.9609	33.4	1806.16	33.4	1178.34	33.5	-74.2242	33.5	16.25
33.6	-38.6969	33.6	0.296875	33.5	645.89	33.5	17.9609	33.5	1810.21	33.5	1185.39	33.6	-74.1375	33.6	16.2813
33.7	-38.5445	33.7	0.296875	33.6	646.662	33.6	17.9539	33.6	1814.18	33.6	1192.5	33.7	-74.0758	33.7	16.2766
33.8	-38.4039	33.8	0.305481	33.7	647.397	33.7	17.9734	33.7	1818.25	33.7	1199.68	33.8	-73.9906	33.8	16.2781
33.9	-38.2359	33.9	0.296082	33.8	648.148	33.8	17.9774	33.8	1822.13	33.8	1206.66	33.9	-73.9109	33.9	16.2914
34	-38.0711	34	0.293762	33.9	648.92	33.9	17.9609	33.9	1826.06	33.9	1213.47	34	-73.8578	34	16.3055
34.1	-37.9383	34.1	0.296082	34	649.656	34	17.9656	34	1829.9	34	1220.2	34.1	-73.782	34.1	16.3242
34.2	-37.7828	34.2	0.28595	34.1	650.381	34.1	17.9656	34.1	1833.68	34.1	1226.86	34.2	-73.6969	34.2	16.3273
34.3	-37.6313	34.3	0.289063	34.2	651.1	34.2	17.9609	34.2	1837.38	34.2	1233.52	34.3	-73.6422	34.3	16.332
34.4	-37.4813	34.4	0.284363	34.3	651.816	34.3	17.9656	34.3	1840.93	34.3	1239.98	34.4	-73.5992	34.4	16.3391
34.5	-37.3211	34.5	0.289063	34.4	652.476	34.4	17.9609	34.4	1844.5	34.4	1246.44	34.5	-73.5125	34.5	16.3351
34.6	-37.1508	34.6	0.284363	34.5	653.163	34.5	17.9508	34.5	1847.98	34.5	1252.67	34.6	-73.4352	34.6	16.3484
34.7	-36.9977	34.7	0.274231	34.6	653.842	34.6	17.9461	34.6	1851.4	34.6	1258.88	34.7	-73.3571	34.7	16.3516
34.8	-36.8555	34.8	0.28125	34.7	654.523	34.7	17.9531	34.7	1854.77	34.7	1265.04	34.8	-73.2852	34.8	16.3633
34.9	-36.6852	34.9	0.27655	34.8	655.195	34.8	17.9414	34.8	1858.09	34.8	1271.13	34.9	-73.2016	34.9	16.3703
35	-36.525	35	0.274231	34.9	655.799	34.9	17.9344	34.9	1861.3	34.9	1277.02	35	-73.0977	35	16.3633
35.1	-36.357	35.1	0.264832	35	656.42	35	17.9344	35	1864.46	35	1282.94	35.1	-72.9977	35.1	16.3664
35.2	-36.1891	35.2	0.2547	35.1	657.047	35.1	17.9414	35.1	1867.61	35.1	1288.88	35.2	-72.8914	35.2	16.3797
35.3	-36.0516	35.3	0.2453	35.2	657.683	35.2	17.9344	35.2	1870.82	35.2	1294.43	35.3	-72.7672	35.3	16.3734
35.4	-35.9234	35.4	0.238281	35.3	658.33	35.3	17.9344	35.3	1874.04	35.3	1300.37	35.4	-72.7469	35.4	16.3758
35.5	-35.7867	35.5	0.235168	35.4	658.94	35.4	17.9461	35.4	1876.99	35.4	1305.84	35.5	-72.6696	35.5	16.375
35.6	-35.6383	35.6	0.225769	35.5	659.52	35.5	17.9461	35.5	1879.86	35.5	1311.31	35.6	-72.5984	35.6	16.3734
35.7	-35.5047	35.7	0.21875	35.6	660.159	35.6	17.9461	35.6	1882.8	35.6	1316.73	35.7	-72.5164	35.7	16.368
35.8	-35.3602	35.8	0.222656	35.7	660.709	35.7	17.9578	35.7	1885.64	35.7	1322.14	35.8	-72.4266	35.8	16.3742
35.9	-35.1727	35.9	0.210938	35.8	661.214	35.8	17.9656	35.8	1888.47	35.8	1327.35	35.9	-72.3477	35.9	16.3828
36	-35.0102	36	0.210938	35.9	661.714	35.9	17.968	35.9	1891.27	35.9	1332.5	36	-72.2906	36	16.3664
36.1	-34.8641	36.1	0.206238	36	662.273	36	17.9781	36	1893.97	36	1337.56	36.1	-72.2117	36.1	16.3594
36.2	-34.7125	36.2	0.203918	36.1	662.811	36.1	17.9922	36.1	1896.7	36.1	1342.69	36.2	-72.1336	36.2	16.3711
36.3	-34.5953	36.3	0.194519	36.2	663.316	36.2	18.0016	36.2	1899.38	36.2	1347.89	36.3	-72.0602	36.3	16.3664
36.4	-34.4391	36.4	0.184387	36.3	663.83	36.3	17.9953	36.3	1902.03	36.3	1352.84	36.4	-71.9821	36.4	16.3594
36.5	-34.2742	36.5	0.174988	36.4	664.343	36.4	18.0047	36.4	1904.56	36.4	1357.63	36.5	-71.9141	36.5	16.368
36.6	-34.1141	36.6	0.167969	36.5	664.877	36.5	18.0164	36.5	1907.11	36.5	1362.36	36.6	-71.8133	36.6	16.3586
36.7	-33.9547	36.7	0.164856	36.6	665.41	36.6	18.0117	36.6	1909.62	36.6	1367.04	36.7	-71.7352	36.7	16.3633
36.8	-33.7984	36.8	0.155457	36.7	665.92	36.7	18.0125	36.7	1912.17	36.7	1371.69	36.8	-71.6617	36.8	16.3633
36.9	-33.625	36.9	0.143738	36.8	666.444	36.8	18.0164	36.8	1914.59	36.8	1376.28	36.9	-71.5594	36.9	16.3703
37	-33.4977	37	0.145325	36.9	666.949	36.9	18.0164	36.9	1916.97	36.9	1380.72	37	-71.4805	37	16.3633
37.1	-33.3414	37.1	0.140625	37	667.437	37	18.0242	37	1919.26	37	1385.14	37.1	-71.4	37.1	16.3633
37.2	-33.1891	37.2	0.124207	37.1	667.916	37.1	18.0242	37.1	1921.57	37.1	1389.47	37.2	-71.3203	37.2	16.3664
37.3	-33.0555	37.3	0.125793	37.2	668.421	37.2	18.0359	37.2	1923.8	37.2	1393.68	37.3	-71.2321	37.3	16.3602
37.4	-32.8789	37.4	0.121094	37.3	668.916	37.3	18.0281	37.3	1926.08	37.3	1397.89	37.4	-71.1375	37.4	16.3539
37.5	-32.7359	37.5	0.116394	37.4	669.414	37.4	18.0281	37.4	1928.31	37.4	1402.05	37.5	-71.0469	37.5	16.3563
37.6	-32.5906	37.6	0.0976563	37.5	669.913	37.5	18.0266	37.5	1930.51	37.5	1406.19	37.6	-70.9539	37.6	16.3586
37.7	-32.443	37.7	0.0945435	37.6	670.413	37.6	18.0242	37.6	1932.72	37.6	1410.19	37.7	-70.8992	37.7	16.3633
37.8	-32.3258	37.8	0.085144	37.7	670.858	37.7	18.0164	37.7	1934.8	37.7	1414.18	37.8	-70.8047	37.8	16.3516
37.9	-32.2	37.9	0.0734253	37.8	671.336	37.8	18.0164	37.8	1936.87	37.8	1418.08	37.9	-70.7078	37.9	16.3633
38	-32.0727	38	0.0664063	37.9	671.819	37.9	18.0164	37.9	1938.92	37.9	1421.92	38	-70.6328	38	16.3633
38.1	-31.9031	38.1	0.0632935	38	672.277	38	18.0281	38	1940.95	38	1425.75	38.1	-70.5524	38.1	16.3633
38.2	-31.7742	38.2	0.0585938	38.1	672.717	38.1	18.0281	38.1	1942.94	38.1	1429.58	38.2	-70.4766	38.2	16.3812
38.3	-31.6187	38.3	0.0656128	38.2	673.132	38.2	18.0281	38.2	1944.95	38.2	1433.38	38.3	-70.3719	38.3	16.3711
38.4	-31.4586	38.4	0.0585938	38.3	673.593	38.3	18.0234	38.3	1946.93	38.3	1436.91	38.4	-70.2852	38.4	16.3875
38.5	-31.3203	38.5	0.055481	38.4	673.995	38.4	18.0164	38.4	1948.92	38.4	1440.44	38.5	-70.2148	38.5	16.3898
38.6	-31.1656	38.6	0.0507813	38.5	674.421	38.5	18.0281	38.5	1950.89	38.5	1443.87	38.6	-70.1297	38.6	16.3828
38.7	-31.0211	38.7	0.0460815	38.6	674.851	38.6	18.0164	38.6	1952.8	38.6	1447.32	38.7	-70.0516	38.7	16.3906
38.8	-30.8758	38.8	0.0437622	38.7	675.277	38.7	18.007	38.7	1954.62	38.7	1450.73	38.8	-69.9766	38.8	16.3945
38.9	-30.7156	38.9	0.0343628	38.8	675.714	38.8	18.0047	38.8	1956.49	38.8	1454.11	38.9	-69.8914	38.9	16.4023
39	-30.5797	39	0.0195313	38.9	676.163	38.9	18.0047	38.9	1958.29	38.9	1457.39	39	-69.7969	39	16.3976
39.1	-30.4609	39.1	0.0164185	39	676.562	39	18.0094	39	1960.08	39	1460.52	39.1	-69.7031	39.1	16.4023
39.2	-30.3227	39.2	0.0117188	39.1	677.011	39.1	18.007	39.1	1961.88	39.1	1463.69	39.2	-69.6102	39.2	16.4141
39.3	-30.1602	39.3	0.0195313	39.2	677.472	39.2	18.0047	39.2	1963.69	39.2	1466.87	39.3	-69.5281	39.3	16.425
39.4	-30.0094	39.4	0.0265503	39.3	677.769	39.3	18.0094	39.3	1965.47	39.3	1469.98	39.4	-69.4578	39.4	16.4336
39.5	-29.8563	39.5	0.0195313	39.4	678.159	39.4	18.0117	39.4	1967.25	39.4	1473	39.5	-69.3719	39.5	16.4219
39.6	-29.7203	39.6	0.0148315	39.5	678.535	39.5	18.0094	39.5	1968.94	39.5	1476.03	39.6	-69.2805	39.6	16.4219
39.7	-29.543	39.7	0.0078125	39.6	678.936	39.6	18.0195	39.6	1970.59	39.6	1479.04	39.7	-69.1953	39.7	16.4367
39.8	-29.3687	39.8	-0.00701904	39.7	679.3	39.7	18.0242	39.7	1972.23	39.7	1481.91	39.8	-69.0906	39.8	16.4297
39.9	-29.2227	39.9	0	39.8	679.722	39.8	18.0359	39.8	1973.86	39.8	1484.85	39.9	-68.9891	39.9	16.4461
40	-29.0438	40	-0.00469971	39.9	680.156	39.9	18.0281	39.9	1975.48	39.9	1487.7	40	-68.9141	40	16.4515
40.1	-28.8961	40.1	-0.0117188	40	680.499	40	18.0391	40	1977.1	40	1490.52	40.1	-68.8484	40.1	16.4656
40.2	-28.7352	40.2	-0.0117188	40.1	680.846	40.1	18.0477	40.1	1978.75	40.1	1493.24	40.2	-68.7773	40.2	16.4844
40.3	-28.5828	40.3	-0.0148315	40.2	681.199	40.2	18.0477	40.2	1980.35	40.2	1496.01	40.3	-68.7047	40.3	16.4922
40.4	-28.4391	40.4	-0.0195313	40.3	681.545	40.3	18.0555	40.3	1981.96	40.3	1498.66	40.4	-68.6438	40.4	16.5023
40.5	-28.2789	40.5	-0.0195313	40.4	681.898	40.4	18.0703	40.4	1983.51	40.4	1501.29	40.5	-68.5516	40.5	16.5
40.6	-28.1453	40.6	-0.0078125	40.5	682.217	40.5	18.075	40.5	1985.01	40.5	1503.92	40.6	-68.4844	40.6	16.5047
40.7	-28.0117	40.7	-0.0078125	40.6	682.562	40.6	18.082	40.6	1986.56	40.6	1506.49	40.7	-68.4305	40.7	16.507
40.8	-27.9008	40.8	-0.00469971	40.7	682.906	40.7	18.075	40.7	1988.06	40.7	1509.06	40.8	-68.3789	40.8	16.5117
40.9	-27.7742	40.9	0	40.8	683.266	40.8	18.075	40.8	1989.55	40.8	1511.54	40.9	-68.3008	40.9	16.5117
41	-27.6414	41	-0.00311279	40.9	683.584	40.9	18.0797	40.9	1990.99	40.9	1513.99	41	-68.2258	41	16.5234
41.1	-27.5164	41.1	-0.00469971	41	683.917	41	18.0852	41	1992.36	41	1516.36	41.1	-68.1367	41.1	16.5117
41.2	-27.3766	41.2	-0.0117188	41.1	684.246	41.1	18.0875	41.1	1993.75	41.1	1518.68	41.2	-68.0508	41.2	16.507
41.3	-27.2547	41.3	-0.0117188	41.2	684.565	41.2	18.1063	41.2	1995.13	41.2	1520.99	41.3	-67.9656	41.3	16.507
41.4	-27.1383	41.4	-0.0148315	41.3	684.895	41.3	18.1063	41.3	1996.56	41.3	1523.31	41.4	-67.8586	41.4	16.5117
41.5	-27.0047	41.5	-0.0125122	41.4	685.222	41.4	18.1063	41.4	1997.92	41.4	1525.56	41.5	-67.7547	41.5	16.5117
41.6	-26.8563	41.6	-0.0195313	41.5	685.555	41.5	18.1211	41.5	1999.26	41.5	1527.86	41.6	-67.6523	41.6	16.5117
41.7	-26.6844	41.7	-0.0195313	41.6	685.885	41.6	18.1258	41.6	2000.64	41.6	1530.1	41.7	-67.543	41.7	16.5234
41.8	-26.5203	41.8	-0.0195313	41.7	686.223	41.7	18.1406	41.7	2002.02	41.7	1532.33	41.8	-67.4516	41.8	16.5117
41.9	-26.3758	41.9	-0.0164185	41.8	686.537	41.8	18.1531	41.8	2003.31	41.8	1534.43	41.9	-67.3445	41.9	16.5234
42	-26.2164	42	-0.0234375	41.9	686.844	41.9	18.1727	41.9	2004.65	41.9	1536.5	42	-67.2531	42	16.5234
42.1	-26.0672	42.1	-0.0265503	42	687.184	42	18.1844	42	2005.96	42	1538.61	42.1	-67.1852	42.1	16.5266
42.2	-25.9117	42.2	-0.0195313	42.1	687.498	42.1	18.1961	42.1	2007.22	42.1	1540.65	42.2	-67.1164	42.2	16.5234
42.3	-25.7383	42.3	-0.024231	42.2	687.805	42.2	18.1992	42.2	2008.49	42.2	1542.65	42.3	-67.0391	42.3	16.5148
42.4	-25.575	42.4	-0.03125	42.3	688.159	42.3	18.2008	42.3	2009.76	42.3	1544.7	42.4	-66.957	42.4	16.5195
42.5	-25.3922	42.5	-0.0343628	42.4	688.48	42.4	18.1961	42.4	2011.06	42.4	1546.68	42.5	-66.8875	42.5	16.5359
42.6	-25.2398	42.6	-0.0437622	42.5	688.781	42.5	18.1961	42.5	2012.26	42.5	1548.58	42.6	-66.7766	42.6	16.5461
42.7	-25.1016	42.7	-0.0507813	42.6	689.089	42.6	18.2109	42.6	2013.45	42.6	1550.51	42.7	-66.6945	42.7	16.5508
42.8	-24.9508	42.8	-0.0460815	42.7	689.39	42.7	18.2156	42.7	2014.63	42.7	1552.44	42.8	-66.6063	42.8	16.5625
42.9	-24.793	42.9	-0.055481	42.8	689.679	42.8	18.2078	42.8	2015.81	42.8	1554.33	42.9	-66.4922	42.9	16.5578
43	-24.6141	43	-0.0625	42.9	689.977	42.9	18.2078	42.9	2017.01	42.9	1556.15	43	-66.4172	43	16.5672
43.1	-24.4656	43.1	-0.055481	43	690.266	43	18.2078	43	2018.19	43	1557.98	43.1	-66.3125	43.1	16.5609
43.2	-24.3297	43.2	-0.0703125	43.1	690.565	43.1	18.2109	43.1	2019.36	43.1	1559.78	43.2	-66.2031	43.2	16.5703
43.3	-24.1766	43.3	-0.0968628	43.2	690.863	43.2	18.2156	43.2	2020.51	43.2	1561.51	43.3	-66.0774	43.3	16.5625
43.4	-24.0164	43.4	-0.0898438	43.3	691.152	43.3	18.2078	43.3	2021.69	43.3	1563.28	43.4	-65.9578	43.4	16.5703
43.5	-23.8594	43.5	-0.0898438	43.4	691.426	43.4	18.1992	43.4	2022.86	43.4	1565.08	43.5	-65.8625	43.5	16.5625
43.6	-23.7234	43.6	-0.0898438	43.5	691.721	43.5	18.2039	43.5	2024	43.5	1566.74	43.6	-65.7523	43.6	16.5703
43.7	-23.5523	43.7	-0.0945435	43.6	692.007	43.6	18.2078	43.6	2025.13	43.6	1568.35	43.7	-65.6406	43.7	16.582
43.8	-23.3922	43.8	-0.104675	43.7	692.308	43.7	18.1992	43.7	2026.15	43.7	1569.97	43.8	-65.5477	43.8	16.582
43.9	-23.25	43.9	-0.109375	43.8	692.594	43.8	18.2039	43.8	2027.21	43.8	1571.6	43.9	-65.4555	43.9	16.582
44	-23.1109	44	-0.114075	43.9	692.921	43.9	18.1844	43.9	2028.28	43.9	1573.18	44	-65.3484	44	16.5891
44.1	-22.9688	44.1	-0.132813	44	693.226	44	18.1766	44	2029.32	44	1574.74	44.1	-65.2461	44.1	16.6016
44.2	-22.8219	44.2	-0.135925	44.1	693.538	44.1	18.1844	44.1	2030.38	44.1	1576.31	44.2	-65.1594	44.2	16.6047
44.3	-22.6578	44.3	-0.145325	44.2	693.84	44.2	18.1914	44.2	2031.45	44.2	1577.81	44.3	-65.0469	44.3	16.6094
44.4	-22.5	44.4	-0.164856	44.3	694.145	44.3	18.1961	44.3	2032.52	44.3	1579.32	44.4	-64.9359	44.4	16.6211
44.5	-22.3609	44.5	-0.174988	44.4	694.441	44.4	18.1844	44.4	2033.6	44.4	1580.81	44.5	-64.8438	44.5	16.6211
44.6	-22.2383	44.6	-0.196106	44.5	694.723	44.5	18.1844	44.5	2034.66	44.5	1582.3	44.6	-64.7422	44.6	16.6359
44.7	-22.1187	44.7	-0.210938	44.6	694.999	44.6	18.1766	44.6	2035.7	44.6	1583.79	44.7	-64.6758	44.7	16.6406
44.8	-21.993	44.8	-0.210938	44.7	695.3	44.7	18.1649	44.7	2036.77	44.7	1585.28	44.8	-64.5695	44.8	16.6484
44.9	-21.8445	44.9	-0.21405	44.8	695.582	44.8	18.1602	44.8	2037.85	44.8	1586.77	44.9	-64.457	44.9	16.6602
45	-21.7039	45	-0.22345	44.9	695.87	44.9	18.1649	44.9	2038.76	44.9	1588.24	45	-64.3617	45	16.6719
45.1	-21.5797	45.1	-0.233582	45	696.148	45	18.1523	45	2039.71	45	1589.6	45.1	-64.2656	45.1	16.6719
45.2	-21.4492	45.2	-0.25	45.1	696.434	45.1	18.1453	45.1	2040.67	45.1	1590.91	45.2	-64.1516	45.2	16.6719
45.3	-21.3102	45.3	-0.2547	45.2	696.694	45.2	18.1258	45.2	2041.66	45.2	1592.25	45.3	-64.043	45.3	16.6867
45.4	-21.1719	45.4	-0.264832	45.3	696.969	45.3	18.1258	45.3	2042.62	45.3	1593.58	45.4	-63.9602	45.4	16.6914
45.5	-21.0328	45.5	-0.274231	45.4	697.237	45.4	18.1016	45.4	2043.62	45.4	1594.93	45.5	-63.8703	45.5	16.6914
45.6	-20.8906	45.6	-0.28595	45.5	697.512	45.5	18.0945	45.5	2044.61	45.5	1596.3	45.6	-63.7734	45.6	16.7062
45.7	-20.7398	45.7	-0.303894	45.6	697.808	45.6	18.0945	45.6	2045.63	45.6	1597.65	45.7	-63.6789	45.7	16.6992
45.8	-20.5984	45.8	-0.320313	45.7	698.07	45.7	18.0945	45.7	2046.55	45.7	1598.74	45.8	-63.6063	45.8	16.6961
45.9	-20.4344	45.9	-0.325012	45.8	698.324	45.8	18.0945	45.8	2047.44	45.8	1599.99	45.9	-63.5383	45.9	16.7031
46	-20.3102	46	-0.332031	45.9	698.582	45.9	18.0867	45.9	2048.36	45.9	1601.18	46	-63.4797	46	16.6984
46.1	-20.1836	46.1	-0.332031	46	698.851	46	18.0867	46	2049.27	46	1602.39	46.1	-63.3945	46.1	16.6984
46.2	-20.0438	46.2	-0.335144	46.1	699.089	46.1	18.0852	46.1	2050.18	46.1	1603.61	46.2	-63.3078	46.2	16.6914
46.3	-19.8836	46.3	-0.339844	46.2	699.327	46.2	18.0828	46.2	2051.08	46.2	1604.83	46.3	-63.2375	46.3	16.6914
46.4	-19.7594	46.4	-0.344543	46.3	699.582	46.3	18.0828	46.3	2051.97	46.3	1606	46.4	-63.1649	46.4	16.6914
46.5	-19.618	46.5	-0.359375	46.4	699.847	46.4	18.075	46.4	2052.84	46.4	1607.17	46.5	-63.0938	46.5	16.6836
46.6	-19.4805	46.6	-0.359375	46.5	700.113	46.5	18.075	46.5	2053.74	46.5	1608.31	46.6	-63.0031	46.6	16.6867
46.7	-19.3484	46.7	-0.371094	46.6	700.354	46.6	18.0867	46.6	2054.62	46.6	1609.43	46.7	-62.8969	46.7	16.6914
46.8	-19.1961	46.8	-0.374207	46.7	700.574	46.7	18.075	46.7	2055.5	46.7	1610.52	46.8	-62.793	46.8	16.6797
46.9	-19.0211	46.9	-0.383606	46.8	700.827	46.8	18.082	46.8	2056.35	46.8	1611.63	46.9	-62.6992	46.9	16.6766
47	-18.8594	47	-0.390625	46.9	701.058	46.9	18.0867	46.9	2057.2	46.9	1612.73	47	-62.6047	47	16.6937
47.1	-18.7125	47.1	-0.390625	47	701.277	47	18.082	47	2058.05	47	1613.8	47.1	-62.5063	47.1	16.6797
47.2	-18.5359	47.2	-0.402344	47.1	701.499	47.1	18.068	47.1	2058.84	47.1	1614.87	47.2	-62.4188	47.2	16.6719
47.3	-18.3711	47.3	-0.407043	47.2	701.738	47.2	18.075	47.2	2059.64	47.2	1615.92	47.3	-62.3461	47.3	16.6719
47.4	-18.2125	47.4	-0.414063	47.3	701.977	47.3	18.0898	47.3	2060.46	47.3	1616.97	47.4	-62.2336	47.4	16.6602
47.5	-18.0547	47.5	-0.417175	47.4	702.21	47.4	18.0945	47.4	2061.32	47.4	1617.97	47.5	-62.1399	47.5	16.6523
47.6	-17.9039	47.6	-0.421875	47.5	702.441	47.5	18.0867	47.5	2062.19	47.5	1618.99	47.6	-62.0813	47.6	16.6555
47.7	-17.7539	47.7	-0.410156	47.6	702.687	47.6	18.0867	47.6	2063.05	47.6	1620.01	47.7	-62.0008	47.7	16.6602
47.8	-17.5672	47.8	-0.410156	47.7	702.917	47.7	18.0898	47.7	2063.89	47.7	1620.97	47.8	-61.9164	47.8	16.6523
47.9	-17.4219	47.9	-0.410156	47.8	703.152	47.8	18.0945	47.8	2064.71	47.8	1621.95	47.9	-61.8235	47.9	16.6406
48	-17.2859	48	-0.410156	47.9	703.395	47.9	18.0992	47.9	2065.53	47.9	1622.95	48	-61.7141	48	16.6476
48.1	-17.1539	48.1	-0.414856	48	703.62	48	18.0969	48	2066.34	48	1623.87	48.1	-61.6289	48.1	16.6523
48.2	-17.0117	48.2	-0.424988	48.1	703.859	48.1	18.0945	48.1	2067.16	48.1	1624.8	48.2	-61.5344	48.2	16.6406
48.3	-16.8602	48.3	-0.429688	48.2	704.094	48.2	18.0945	48.2	2067.99	48.2	1625.74	48.3	-61.4359	48.3	16.6328
48.4	-16.6961	48.4	-0.429688	48.3	704.295	48.3	18.0945	48.3	2068.81	48.3	1626.66	48.4	-61.343	48.4	16.6211
48.5	-16.5523	48.5	-0.429688	48.4	704.488	48.4	18.0992	48.4	2069.59	48.4	1627.58	48.5	-61.2578	48.5	16.6133
48.6	-16.4109	48.6	-0.434387	48.5	704.704	48.5	18.1016	48.5	2070.36	48.5	1628.48	48.6	-61.1586	48.6	16.6016
48.7	-16.2492	48.7	-0.441406	48.6	704.912	48.6	18.1063	48.6	2071.16	48.6	1629.37	48.7	-61.0617	48.7	16.5922
48.8	-16.0867	48.8	-0.444519	48.7	705.113	48.7	18.1016	48.7	2071.96	48.7	1630.25	48.8	-60.9688	48.8	16.5867
48.9	-15.943	48.9	-0.453918	48.8	705.316	48.8	18.0945	48.8	2072.77	48.8	1631.15	48.9	-60.8984	48.9	16.582
49	-15.7899	49	-0.460938	48.9	705.526	48.9	18.0867	48.9	2073.55	48.9	1632.07	49	-60.8156	49	16.5742
49.1	-15.6375	49.1	-0.460938	49	705.698	49	18.0898	49	2074.24	49	1632.95	49.1	-60.7289	49.1	16.5625
49.2	-15.4844	49.2	-0.460938	49.1	705.883	49.1	18.0945	49.1	2074.96	49.1	1633.74	49.2	-60.632	49.2	16.5531
49.3	-15.3445	49.3	-0.46405	49.2	706.089	49.2	18.0875	49.2	2075.68	49.2	1634.55	49.3	-60.5703	49.3	16.5391
49.4	-15.2078	49.4	-0.47345	49.3	706.301	49.3	18.1016	49.3	2076.41	49.3	1635.33	49.4	-60.4485	49.4	16.5313
49.5	-15.0945	49.5	-0.480469	49.4	706.538	49.4	18.1031	49.4	2077.15	49.4	1636.13	49.5	-60.3188	49.5	16.5313
49.6	-14.9625	49.6	-0.485168	49.5	706.765	49.5	18.0898	49.5	2077.88	49.5	1636.95	49.6	-60.2141	49.6	16.5234
49.7	-14.8125	49.7	-0.4953	49.6	706.997	49.6	18.0945	49.6	2078.58	49.6	1637.75	49.7	-60.0898	49.7	16.5148
49.8	-14.6641	49.8	-0.488281	49.7	707.245	49.7	18.0867	49.7	2079.31	49.7	1638.52	49.8	-59.9906	49.8	16.5164
49.9	-14.5133	49.9	-0.492981	49.8	707.488	49.8	18.0867	49.8	2080.03	49.8	1639.29	49.9	-59.8773	49.9	16.5117
50	-14.3875	50	-0.511719	49.9	707.706	49.9	18.0898	49.9	2080.75	49.9	1640.11	50	-59.7531	50	16.507
50.1	-14.2625	50.1	-0.503113	50	707.946	50	18.0867	50	2081.46	50	1640.93	50.1	-59.6406	50.1	16.5117
50.2	-14.1453	50.2	-0.507813	50.1	708.179	50.1	18.0867	50.1	2082.24	50.1	1641.74	50.2	-59.5609	50.2	16.4922
50.3	-14.0242	50.3	-0.512512	50.2	708.422	50.2	18.0703	50.2	2083.03	50.2	1642.48	50.3	-59.4563	50.3	16.4922
50.4	-13.8758	50.4	-0.519531	50.3	708.656	50.3	18.0797	50.3	2083.78	50.3	1643.17	50.4	-59.3672	50.4	16.4875
50.5	-13.732	50.5	-0.522644	50.4	708.876	50.4	18.082	50.4	2084.45	50.4	1643.88	50.5	-59.2946	50.5	16.4805
50.6	-13.5906	50.6	-0.519531	50.5	709.092	50.5	18.0914	50.5	2085.12	50.5	1644.61	50.6	-59.2188	50.6	16.4609
50.7	-13.4453	50.7	-0.524231	50.6	709.316	50.6	18.0898	50.6	2085.82	50.6	1645.34	50.7	-59.1273	50.7	16.4531
50.8	-13.293	50.8	-0.542175	50.7	709.52	50.7	18.1063	50.7	2086.5	50.7	1646.08	50.8	-59.0617	50.8	16.4367
50.9	-13.1422	50.9	-0.551575	50.8	709.718	50.8	18.1063	50.8	2087.14	50.8	1646.8	50.9	-58.9805	50.9	16.4344
51	-12.9922	51	-0.558594	50.9	709.91	50.9	18.1063	50.9	2087.81	50.9	1647.5	51	-58.8781	51	16.4336
51.1	-12.8141	51.1	-0.575012	51	710.121	51	18.118	51	2088.47	51	1648.19	51.1	-58.7672	51.1	16.425
51.2	-12.6688	51.2	-0.585144	51.1	710.313	51.1	18.1063	51.1	2089.14	51.1	1648.9	51.2	-58.6516	51.2	16.4336
51.3	-12.5086	51.3	-0.606262	51.2	710.502	51.2	18.1016	51.2	2089.8	51.2	1649.59	51.3	-58.5344	51.3	16.4219
51.4	-12.3391	51.4	-0.613281	51.3	710.711	51.3	18.1063	51.3	2090.46	51.3	1650.24	51.4	-58.457	51.4	16.425
51.5	-12.1812	51.5	-0.624207	51.4	710.907	51.4	18.118	51.4	2091.13	51.4	1650.88	51.5	-58.35	51.5	16.4102
51.6	-12.0477	51.6	-0.628906	51.5	711.123	51.5	18.1289	51.5	2091.79	51.5	1651.54	51.6	-58.2375	51.6	16.4149
51.7	-11.8945	51.7	-0.633606	51.6	711.325	51.6	18.1453	51.6	2092.45	51.6	1652.17	51.7	-58.0852	51.7	16.425
51.8	-11.7437	51.8	-0.643738	51.7	711.526	51.7	18.1531	51.7	2093.13	51.7	1652.81	51.8	-57.9633	51.8	16.425
51.9	-11.6102	51.9	-0.664856	51.8	711.696	51.8	18.1649	51.8	2093.8	51.8	1653.43	51.9	-57.8469	51.9	16.4219
52	-11.457	52	-0.676575	51.9	711.893	51.9	18.1649	51.9	2094.47	51.9	1654.06	52	-57.7336	52	16.407
52.1	-11.2977	52.1	-0.694519	52	712.09	52	18.1844	52	2095.14	52	1654.68	52.1	-57.6625	52.1	16.4172
52.2	-11.1523	52.2	-0.699219	52.1	712.296	52.1	18.1961	52.1	2095.82	52.1	1655.31	52.2	-57.5735	52.2	16.4266
52.3	-10.9937	52.3	-0.715637	52.2	712.492	52.2	18.1992	52.2	2096.46	52.2	1655.91	52.3	-57.4758	52.3	16.4219
52.4	-10.8438	52.4	-0.733582	52.3	712.691	52.3	18.2039	52.3	2097.09	52.3	1656.51	52.4	-57.386	52.4	16.4172
52.5	-10.7	52.5	-0.738281	52.4	712.878	52.4	18.1961	52.4	2097.63	52.4	1657.12	52.5	-57.2602	52.5	16.4367
52.6	-10.5469	52.6	-0.7547	52.5	713.023	52.5	18.1992	52.5	2098.18	52.5	1657.69	52.6	-57.168	52.6	16.4414
52.7	-10.3648	52.7	-0.761719	52.6	713.203	52.6	18.2086	52.6	2098.77	52.6	1658.28	52.7	-57.0805	52.7	16.4461
52.8	-10.207	52.8	-0.77655	52.7	713.378	52.7	18.1961	52.7	2099.38	52.7	1658.85	52.8	-56.9828	52.8	16.4562
52.9	-10.0594	52.9	-0.793762	52.8	713.534	52.8	18.1914	52.8	2100.03	52.8	1659.41	52.9	-56.9055	52.9	16.4656
53	-9.88751	53	-0.815613	52.9	713.708	52.9	18.1891	52.9	2100.64	52.9	1659.98	53	-56.8156	53	16.4648
53.1	-9.74219	53.1	-0.832825	53	713.885	53	18.1945	53	2101.26	53	1660.57	53.1	-56.7211	53.1	16.4515
53.2	-9.59531	53.2	-0.851563	53.1	714.038	53.1	18.1961	53.1	2101.87	53.1	1661.14	53.2	-56.6211	53.2	16.4539
53.3	-9.44843	53.3	-0.856262	53.2	714.208	53.2	18.1844	53.2	2102.51	53.2	1661.71	53.3	-56.5023	53.3	16.4562
53.4	-9.33359	53.4	-0.874207	53.3	714.382	53.3	18.1922	53.3	2103.1	53.3	1662.28	53.4	-56.4125	53.4	16.4656
53.5	-9.18048	53.5	-0.895325	53.4	714.558	53.4	18.1961	53.4	2103.68	53.4	1662.87	53.5	-56.2961	53.5	16.4727
53.6	-9.04767	53.6	-0.902344	53.5	714.738	53.5	18.1844	53.5	2104.29	53.5	1663.43	53.6	-56.1898	53.6	16.4758
53.7	-8.93359	53.7	-0.902344	53.6	714.917	53.6	18.1797	53.6	2104.86	53.6	1663.99	53.7	-56.0742	53.7	16.4609
53.8	-8.79767	53.8	-0.913269	53.7	715.082	53.7	18.1891	53.7	2105.43	53.7	1664.54	53.8	-55.9547	53.8	16.4562
53.9	-8.66171	53.9	-0.929688	53.8	715.265	53.8	18.1961	53.8	2106.03	53.8	1665.09	53.9	-55.8594	53.9	16.4656
54	-8.52344	54	-0.929688	53.9	715.449	53.9	18.1914	53.9	2106.6	53.9	1665.62	54	-55.7523	54	16.4758
54.1	-8.39923	54.1	-0.941406	54	715.633	54	18.1844	54	2107.14	54	1666.14	54.1	-55.6399	54.1	16.4805
54.2	-8.27032	54.2	-0.953918	54.1	715.808	54.1	18.1649	54.1	2107.69	54.1	1666.67	54.2	-55.5336	54.2	16.4969
54.3	-8.14453	54.3	-0.960938	54.2	715.956	54.2	18.1602	54.2	2108.24	54.2	1667.19	54.3	-55.4172	54.3	16.5187
54.4	-8.00861	54.4	-0.975769	54.3	716.102	54.3	18.1453	54.3	2108.8	54.3	1667.69	54.4	-55.3109	54.4	16.5266
54.5	-7.85626	54.5	-0.988281	54.4	716.296	54.4	18.1336	54.4	2109.36	54.4	1668.19	54.5	-55.2063	54.5	16.5359
54.6	-7.71484	54.6	-1	54.5	716.461	54.5	18.1258	54.5	2109.93	54.5	1668.7	54.6	-55.1399	54.6	16.5234
54.7	-7.53595	54.7	-1	54.6	716.644	54.6	18.118	54.6	2110.5	54.6	1669.23	54.7	-55.0485	54.7	16.5266
54.8	-7.40704	54.8	-1.00781	54.7	716.825	54.7	18.1094	54.7	2111.07	54.7	1669.7	54.8	-54.9727	54.8	16.5195
54.9	-7.29062	54.9	-1.01953	54.8	717.015	54.8	18.0992	54.8	2111.62	54.8	1670.2	54.9	-54.893	54.9	16.5164
55	-7.15625	55	-1.01953	54.9	717.211	54.9	18.0938	54.9	2112.19	54.9	1670.68	55	-54.8	55	16.5187
55.1	-7.00079	55.1	-1.01953	55	717.398	55	18.0828	55	2112.77	55	1671.19	55.1	-54.6938	55.1	16.5039
55.2	-6.85156	55.2	-1.01953	55.1	717.59	55.1	18.0867	55.1	2113.32	55.1	1671.68	55.2	-54.5969	55.2	16.5
55.3	-6.72031	55.3	-1.02423	55.2	717.796	55.2	18.0781	55.2	2113.88	55.2	1672.15	55.3	-54.5023	55.3	16.5117
55.4	-6.58673	55.4	-1.03906	55.3	717.985	55.3	18.075	55.3	2114.44	55.3	1672.61	55.4	-54.4055	55.4	16.507
55.5	-6.45001	55.5	-1.03906	55.4	718.202	55.4	18.0485	55.4	2115	55.4	1673.04	55.5	-54.3227	55.5	16.4969
55.6	-6.32422	55.6	-1.03906	55.5	718.379	55.5	18.0477	55.5	2115.56	55.5	1673.47	55.6	-54.218	55.6	16.5023
55.7	-6.18829	55.7	-1.05078	55.6	718.555	55.6	18.0391	55.6	2116.08	55.6	1673.9	55.7	-54.1086	55.7	16.4969
55.8	-6.03125	55.8	-1.05078	55.7	718.745	55.7	18.0359	55.7	2116.64	55.7	1674.33	55.8	-54.0172	55.8	16.4953
55.9	-5.87265	55.9	-1.0625	55.8	718.91	55.8	18.0164	55.8	2117.19	55.8	1674.78	55.9	-53.9023	55.9	16.4969
56	-5.73126	56	-1.0625	55.9	719.07	55.9	18.0195	55.9	2117.74	55.9	1675.21	56	-53.7953	56	16.4953
56.1	-5.57422	56.1	-1.06561	56	719.257	56	18.0164	56	2118.28	56	1675.66	56.1	-53.7102	56.1	16.4969
56.2	-5.43048	56.2	-1.0672	56.1	719.415	56.1	18.0047	56.1	2118.82	56.1	1676.06	56.2	-53.6078	56.2	16.5039
56.3	-5.27032	56.3	-1.06561	56.2	719.592	56.2	18	56.2	2119.38	56.2	1676.47	56.3	-53.4899	56.3	16.4953
56.4	-5.11719	56.4	-1.0672	56.3	719.766	56.3	17.993	56.3	2119.95	56.3	1676.9	56.4	-53.3977	56.4	16.4922
56.5	-4.96484	56.5	-1.06561	56.4	719.937	56.4	17.9852	56.4	2120.54	56.4	1677.31	56.5	-53.2883	56.5	16.4844
56.6	-4.8172	56.6	-1.07031	56.5	720.097	56.5	17.9852	56.5	2121.08	56.5	1677.74	56.6	-53.1891	56.6	16.4758
56.7	-4.67578	56.7	-1.07813	56.6	720.242	56.6	17.9703	56.6	2121.6	56.6	1678.18	56.7	-53.0805	56.7	16.4727
56.8	-4.52814	56.8	-1.07813	56.7	720.407	56.7	17.9805	56.7	2122.12	56.7	1678.59	56.8	-52.9758	56.8	16.4656
56.9	-4.39609	56.9	-1.07813	56.8	720.569	56.8	17.9883	56.8	2122.63	56.8	1679.01	56.9	-52.8625	56.9	16.468
57	-4.24139	57	-1.07813	56.9	720.719	56.9	17.9899	56.9	2123.14	56.9	1679.44	57	-52.7328	57	16.4609
57.1	-4.07187	57.1	-1.09454	57	720.878	57	17.9969	57	2123.66	57	1679.87	57.1	-52.6469	57.1	16.4562
57.2	-3.95001	57.2	-1.10156	57.1	721.046	57.1	17.9852	57.1	2124.15	57.1	1680.27	57.2	-52.5219	57.2	16.4656
57.3	-3.80469	57.3	-1.10156	57.2	721.211	57.2	17.9922	57.2	2124.65	57.2	1680.68	57.3	-52.4367	57.3	16.468
57.4	-3.66406	57.4	-1.10156	57.3	721.363	57.3	17.9899	57.3	2125.14	57.3	1681.11	57.4	-52.3313	57.4	16.4656
57.5	-3.48517	57.5	-1.10938	57.4	721.504	57.4	17.9875	57.4	2125.63	57.4	1681.52	57.5	-52.2367	57.5	16.4711
57.6	-3.33359	57.6	-1.11407	57.5	721.648	57.5	17.9781	57.5	2126.14	57.5	1681.96	57.6	-52.1352	57.6	16.4656
57.7	-3.16876	57.7	-1.13281	57.6	721.784	57.6	17.9774	57.6	2126.62	57.6	1682.39	57.7	-52.0219	57.7	16.4641
57.8	-3.02032	57.8	-1.13281	57.7	721.941	57.7	17.9805	57.7	2127.1	57.7	1682.8	57.8	-51.9359	57.8	16.4609
57.9	-2.88281	57.9	-1.13281	57.8	722.085	57.8	17.9813	57.8	2127.58	57.8	1683.2	57.9	-51.8274	57.9	16.4578
58	-2.74689	58	-1.13281	57.9	722.238	57.9	17.9969	57.9	2128.07	57.9	1683.61	58	-51.757	58	16.4562
58.1	-2.59375	58.1	-1.14063	58	722.407	58	18.0047	58	2128.57	58	1684.01	58.1	-51.7055	58.1	16.4656
58.2	-2.45782	58.2	-1.14063	58.1	722.558	58.1	18.0164	58.1	2129.04	58.1	1684.39	58.2	-51.6086	58.2	16.4515
58.3	-2.30157	58.3	-1.14374	58.2	722.706	58.2	18.0078	58.2	2129.55	58.2	1684.8	58.3	-51.5258	58.3	16.4375
58.4	-2.14923	58.4	-1.14844	58.3	722.852	58.3	18.0172	58.3	2130.05	58.3	1685.17	58.4	-51.4633	58.4	16.4414
58.5	-2.01251	58.5	-1.14844	58.4	722.992	58.4	18.0195	58.4	2130.55	58.4	1685.56	58.5	-51.3539	58.5	16.4297
58.6	-1.86017	58.6	-1.14844	58.5	723.156	58.5	18.0289	58.5	2131.03	58.5	1685.92	58.6	-51.2641	58.6	16.4266
58.7	-1.73438	58.7	-1.16016	58.6	723.308	58.6	18.0391	58.6	2131.51	58.6	1686.34	58.7	-51.1789	58.7	16.4219
58.8	-1.59064	58.8	-1.16016	58.7	723.469	58.7	18.0406	58.7	2132.01	58.7	1686.71	58.8	-51.0813	58.8	16.4172
58.9	-1.42578	58.9	-1.16016	58.8	723.618	58.8	18.0477	58.8	2132.5	58.8	1687.09	58.9	-50.9945	58.9	16.4172
59	-1.27344	59	-1.16486	58.9	723.752	58.9	18.0508	58.9	2132.98	58.9	1687.44	59	-50.9047	59	16.418
59.1	-1.12265	59.1	-1.18359	59	723.907	59	18.0555	59	2133.48	59	1687.81	59.1	-50.7758	59.1	16.4297
59.2	-0.980469	59.2	-1.18359	59.1	724.041	59.1	18.0508	59.1	2133.94	59.1	1688.16	59.2	-50.6594	59.2	16.4266
59.3	-0.840637	59.3	-1.18671	59.2	724.18	59.2	18.0602	59.2	2134.43	59.2	1688.51	59.3	-50.5875	59.3	16.425
59.4	-0.703125	59.4	-1.19922	59.3	724.323	59.3	18.0703	59.3	2134.92	59.3	1688.88	59.4	-50.4875	59.4	16.4297
59.5	-0.56015	59.5	-1.19922	59.4	724.485	59.4	18.0914	59.4	2135.38	59.4	1689.24	59.5	-50.3617	59.5	16.4414
59.6	-0.438293	59.6	-1.20392	59.5	724.628	59.5	18.0898	59.5	2135.84	59.5	1689.58	59.6	-50.2688	59.6	16.425
59.7	-0.316406	59.7	-1.21094	59.6	724.749	59.6	18.0945	59.6	2136.32	59.6	1689.91	59.7	-50.1547	59.7	16.4344
59.8	-0.16095	59.8	-1.21094	59.7	724.876	59.7	18.0977	59.7	2136.8	59.7	1690.26	59.8	-50.0602	59.8	16.4219
59.9	-0.0234375	59.9	-1.21094	59.8	725.027	59.8	18.111	59.8	2137.25	59.8	1690.6	59.9	-49.9531	59.9	16.425
60	0.107819	60	-1.22266	59.9	725.187	59.9	18.1211	59.9	2137.69	59.9	1690.92	60	-49.8297	60	16.4266
60.1	0.258606	60.1	-1.23047	60	725.337	60	18.1188	60	2138.15	60	1691.25	60.1	-49.7688	60.1	16.4219
60.2	0.396881	60.2	-1.23517	60.1	725.488	60.1	18.1289	60.1	2138.6	60.1	1691.58	60.2	-49.6977	60.2	16.4125
60.3	0.542175	60.3	-1.24219	60.2	725.633	60.2	18.1375	60.2	2139.04	60.2	1691.9	60.3	-49.5914	60.3	16.4149
60.4	0.6875	60.4	-1.2453	60.3	725.769	60.3	18.1289	60.3	2139.47	60.3	1692.28	60.4	-49.4844	60.4	16.4172
60.5	0.842957	60.5	-1.25	60.4	725.922	60.4	18.1336	60.4	2139.9	60.4	1692.6	60.5	-49.3922	60.5	16.4102
60.6	0.976563	60.6	-1.26172	60.5	726.058	60.5	18.1305	60.5	2140.34	60.5	1692.92	60.6	-49.2727	60.6	16.4102
60.7	1.13202	60.7	-1.27423	60.6	726.195	60.6	18.1375	60.6	2140.78	60.6	1693.27	60.7	-49.1813	60.7	16.4219
60.8	1.26797	60.8	-1.28436	60.7	726.356	60.7	18.1289	60.7	2141.2	60.7	1693.61	60.8	-49.1008	60.8	16.4266
60.9	1.40155	60.9	-1.28906	60.8	726.523	60.8	18.1258	60.8	2141.59	60.8	1693.94	60.9	-48.9945	60.9	16.4367
61	1.51563	61	-1.28906	60.9	726.667	60.9	18.1258	60.9	2142.02	60.9	1694.26	61	-48.8922	61	16.4336
61.1	1.63202	61.1	-1.29376	61	726.796	61	18.1258	61	2142.47	61	1694.6	61.1	-48.8117	61.1	16.4367
61.2	1.72186	61.2	-1.30078	61.1	726.938	61.1	18.1258	61.1	2142.89	61.1	1694.96	61.2	-48.7008	61.2	16.4344
61.3	1.84296	61.3	-1.30389	61.2	727.066	61.2	18.118	61.2	2143.3	61.2	1695.28	61.3	-48.557	61.3	16.4367
61.4	1.96484	61.4	-1.30859	61.3	727.218	61.3	18.1164	61.3	2143.74	61.3	1695.62	61.4	-48.4438	61.4	16.4414
61.5	2.09296	61.5	-1.31329	61.4	727.371	61.4	18.1071	61.4	2144.16	61.4	1695.94	61.5	-48.3266	61.5	16.4367
61.6	2.19376	61.6	-1.32031	61.5	727.504	61.5	18.1063	61.5	2144.57	61.5	1696.26	61.6	-48.2172	61.6	16.4297
61.7	2.32111	61.7	-1.32031	61.6	727.652	61.6	18.1016	61.6	2144.98	61.6	1696.6	61.7	-48.1008	61.7	16.4266
61.8	2.4328	61.8	-1.32343	61.7	727.813	61.7	18.0992	61.7	2145.41	61.7	1696.92	61.8	-47.9899	61.8	16.425
61.9	2.60782	61.9	-1.33282	61.8	727.968	61.8	18.1063	61.8	2145.86	61.8	1697.22	61.9	-47.8899	61.9	16.4219
62	2.77344	62	-1.33984	61.9	728.097	61.9	18.1016	61.9	2146.31	61.9	1697.57	62	-47.7906	62	16.4266
62.1	2.95313	62.1	-1.34454	62	728.258	62	18.1063	62	2146.75	62	1697.88	62.1	-47.6906	62.1	16.4289
62.2	3.12735	62.2	-1.35468	62.1	728.422	62.1	18.0984	62.1	2147.18	62.1	1698.14	62.2	-47.5766	62.2	16.425
62.3	3.30078	62.3	-1.35938	62.2	728.577	62.2	18.1016	62.2	2147.58	62.2	1698.42	62.3	-47.475	62.3	16.4297
62.4	3.46014	62.4	-1.36407	62.3	728.708	62.3	18.0945	62.3	2148.02	62.3	1698.73	62.4	-47.382	62.4	16.4266
62.5	3.6297	62.5	-1.37109	62.4	728.85	62.4	18.0867	62.4	2148.47	62.4	1699.02	62.5	-47.2875	62.5	16.4219
62.6	3.79532	62.6	-1.37421	62.5	728.997	62.5	18.0781	62.5	2148.88	62.5	1699.3	62.6	-47.1977	62.6	16.4141
62.7	3.96484	62.7	-1.39532	62.6	729.156	62.6	18.075	62.6	2149.33	62.6	1699.59	62.7	-47.0961	62.7	16.4172
62.8	4.10077	62.8	-1.39764	62.7	729.289	62.7	18.068	62.7	2149.78	62.7	1699.84	62.8	-47.0063	62.8	16.425
62.9	4.23749	62.9	-1.39532	62.8	729.449	62.8	18.0672	62.8	2150.2	62.8	1700.1	62.9	-46.8727	62.9	16.4219
63	4.38983	63	-1.40234	62.9	729.57	62.9	18.0625	62.9	2150.6	62.9	1700.39	63	-46.761	63	16.4149
63.1	4.52032	63.1	-1.40546	63	729.726	63	18.0633	63	2151.04	63	1700.67	63.1	-46.6469	63.1	16.4219
63.2	4.67108	63.2	-1.41486	63.1	729.835	63.1	18.0672	63.1	2151.4	63.1	1700.97	63.2	-46.5375	63.2	16.4125
63.3	4.81171	63.3	-1.42188	63.2	729.966	63.2	18.075	63.2	2151.75	63.2	1701.25	63.3	-46.4117	63.3	16.4149
63.4	4.96796	63.4	-1.41327	63.3	730.097	63.3	18.0672	63.3	2152.18	63.3	1701.52	63.4	-46.3235	63.4	16.4141
63.5	5.13202	63.5	-1.41797	63.4	730.23	63.4	18.0633	63.4	2152.58	63.4	1701.77	63.5	-46.2321	63.5	16.4023
63.6	5.27814	63.6	-1.42267	63.5	730.352	63.5	18.0703	63.5	2153	63.5	1702.02	63.6	-46.1273	63.6	16.4023
63.7	5.4328	63.7	-1.43439	63.6	730.492	63.6	18.068	63.6	2153.4	63.6	1702.3	63.7	-46.0211	63.7	16.4008
63.8	5.60077	63.8	-1.44452	63.7	730.628	63.7	18.0586	63.7	2153.79	63.7	1702.58	63.8	-45.9164	63.8	16.3906
63.9	5.75391	63.9	-1.44922	63.8	730.723	63.8	18.0602	63.8	2154.16	63.8	1702.85	63.9	-45.8	63.9	16.3953
64	5.90625	64	-1.45392	63.9	730.84	63.9	18.0508	63.9	2154.56	63.9	1703.14	64	-45.7008	64	16.3976
64.1	6.0578	64.1	-1.46405	64	730.976	64	18.0508	64	2154.96	64	1703.4	64.1	-45.6008	64.1	16.3953
64.2	6.22186	64.2	-1.47345	64.1	731.102	64.1	18.0485	64.1	2155.36	64.1	1703.64	64.2	-45.4984	64.2	16.3976
64.3	6.37811	64.3	-1.48047	64.2	731.245	64.2	18.0508	64.2	2155.77	64.2	1703.89	64.3	-45.4047	64.3	16.407
64.4	6.55078	64.4	-1.48358	64.3	731.386	64.3	18.0485	64.3	2156.15	64.3	1704.13	64.4	-45.3219	64.4	16.4055
64.5	6.69531	64.5	-1.49298	64.4	731.516	64.4	18.0391	64.4	2156.51	64.4	1704.4	64.5	-45.2055	64.5	16.4023
64.6	6.83124	64.6	-1.5047	64.5	731.652	64.5	18.0438	64.5	2156.89	64.5	1704.67	64.6	-45.132	64.6	16.3945
64.7	6.96484	64.7	-1.51172	64.6	731.788	64.6	18.0485	64.6	2157.31	64.6	1704.94	64.7	-45.0414	64.7	16.3859
64.8	7.10077	64.8	-1.51483	64.7	731.93	64.7	18.0508	64.7	2157.72	64.7	1705.19	64.8	-44.9156	64.8	16.3906
64.9	7.20703	64.9	-1.51172	64.8	732.058	64.8	18.0406	64.8	2158.13	64.8	1705.44	64.9	-44.7875	64.9	16.3906
65	7.33124	65	-1.52423	64.9	732.206	64.9	18.0508	64.9	2158.52	64.9	1705.71	65	-44.693	65	16.3742
65.1	7.47186	65.1	-1.53125	65	732.359	65	18.0555	65	2158.93	65	1705.96	65.1	-44.5891	65.1	16.3758
65.2	7.61719	65.2	-1.53436	65.1	732.488	65.1	18.0555	65.1	2159.31	65.1	1706.23	65.2	-44.5258	65.2	16.3742
65.3	7.74844	65.3	-1.55548	65.2	732.621	65.2	18.0508	65.2	2159.69	65.2	1706.51	65.3	-44.4117	65.3	16.3711
65.4	7.8703	65.4	-1.56561	65.3	732.75	65.3	18.0602	65.3	2160.06	65.3	1706.8	65.4	-44.2844	65.4	16.3758
65.5	7.99609	65.5	-1.57501	65.4	732.878	65.4	18.0586	65.4	2160.46	65.4	1707.07	65.5	-44.218	65.5	16.3781
65.6	8.10782	65.6	-1.58514	65.5	733	65.5	18.0602	65.5	2160.86	65.5	1707.34	65.6	-44.1813	65.6	16.3875
65.7	8.23126	65.7	-1.59454	65.6	733.121	65.6	18.0672	65.6	2161.25	65.6	1707.58	65.7	-44.1203	65.7	16.3859
65.8	8.38516	65.8	-1.60156	65.7	733.245	65.7	18.0703	65.7	2161.6	65.7	1707.85	65.8	-44.0727	65.8	16.3828
65.9	8.53827	65.9	-1.60626	65.8	733.359	65.8	18.0672	65.8	2161.99	65.8	1708.1	65.9	-44.0453	65.9	16.3742
66	8.66406	66	-1.61639	65.9	733.461	65.9	18.0633	65.9	2162.35	65.9	1708.37	66	-43.9672	66	16.3789
66.1	8.79688	66.1	-1.62891	66	733.577	66	18.0555	66	2162.74	66	1708.58	66.1	-43.9047	66.1	16.3953
66.2	8.94452	66.2	-1.62579	66.1	733.687	66.1	18.0555	66.1	2163.13	66.1	1708.82	66.2	-43.8266	66.2	16.3906
66.3	9.06171	66.3	-1.63593	66.2	733.786	66.2	18.0586	66.2	2163.53	66.2	1709.05	66.3	-43.7563	66.3	16.4055
66.4	9.1875	66.4	-1.64532	66.3	733.91	66.3	18.0602	66.3	2163.93	66.3	1709.26	66.4	-43.6781	66.4	16.407
66.5	9.32657	66.5	-1.65546	66.4	734.023	66.4	18.0703	66.4	2164.32	66.4	1709.47	66.5	-43.5446	66.5	16.4055
66.6	9.45313	66.6	-1.66486	66.5	734.139	66.5	18.0719	66.5	2164.7	66.5	1709.69	66.6	-43.4242	66.6	16.407
66.7	9.625	66.7	-1.67499	66.6	734.258	66.6	18.075	66.6	2165.06	66.6	1709.92	66.7	-43.3188	66.7	16.4172
66.8	9.76093	66.8	-1.6922	66.7	734.376	66.7	18.082	66.7	2165.42	66.7	1710.14	66.8	-43.1977	66.8	16.4141
66.9	9.90625	66.9	-1.70703	66.8	734.468	66.8	18.0828	66.8	2165.79	66.8	1710.36	66.9	-43.0609	66.9	16.4055
67	10.0422	67	-1.71875	66.9	734.597	66.9	18.0867	66.9	2166.16	66.9	1710.58	67	-42.943	67	16.407
67.1	10.2055	67.1	-1.73047	67	734.735	67	18.0781	67	2166.53	67	1710.82	67.1	-42.8305	67.1	16.4102
67.2	10.3438	67.2	-1.73047	67.1	734.847	67.1	18.0914	67.1	2166.88	67.1	1711.07	67.2	-42.7094	67.2	16.4172
67.3	10.4719	67.3	-1.73047	67.2	734.945	67.2	18.0898	67.2	2167.19	67.2	1711.31	67.3	-42.5836	67.3	16.4149
67.4	10.5938	67.4	-1.73047	67.3	735.078	67.3	18.0914	67.3	2167.53	67.3	1711.56	67.4	-42.4547	67.4	16.4172
67.5	10.7422	67.5	-1.72345	67.4	735.195	67.4	18.0867	67.4	2167.94	67.4	1711.81	67.5	-42.3461	67.5	16.4133
67.6	10.8695	67.6	-1.73047	67.5	735.305	67.5	18.082	67.5	2168.37	67.5	1712.07	67.6	-42.2649	67.6	16.4149
67.7	10.9961	67.7	-1.73047	67.6	735.406	67.6	18.075	67.6	2168.75	67.6	1712.31	67.7	-42.1578	67.7	16.4297
67.8	11.1398	67.8	-1.73358	67.7	735.512	67.7	18.0703	67.7	2169.14	67.7	1712.53	67.8	-42.0227	67.8	16.4367
67.9	11.293	67.9	-1.73828	67.8	735.605	67.8	18.068	67.8	2169.44	67.8	1712.77	67.9	-41.9156	67.9	16.4344
68	11.4484	68	-1.74298	67.9	735.719	67.9	18.0703	67.9	2169.72	67.9	1713	68	-41.7758	68	16.4367
68.1	11.6086	68.1	-1.75	68	735.82	68	18.0672	68	2170.08	68	1713.21	68.1	-41.7484	68.1	16.4461
68.2	11.7586	68.2	-1.75	68.1	735.906	68.1	18.0586	68.1	2170.44	68.1	1713.42	68.2	-41.5961	68.2	16.4367
68.3	11.9211	68.3	-1.75	68.2	736.051	68.2	18.0524	68.2	2170.79	68.2	1713.62	68.3	-41.4398	68.3	16.4414
68.4	12.0742	68.4	-1.75311	68.3	736.16	68.3	18.0391	68.3	2171.16	68.3	1713.84	68.4	-41.3336	68.4	16.4492
68.5	12.2445	68.5	-1.76251	68.4	736.277	68.4	18.0359	68.4	2171.5	68.4	1714.06	68.5	-41.1977	68.5	16.4531
68.6	12.4023	68.6	-1.76953	68.5	736.395	68.5	18.0406	68.5	2171.84	68.5	1714.26	68.6	-41.1117	68.6	16.4562
68.7	12.5625	68.7	-1.76953	68.6	736.512	68.6	18.0508	68.6	2172.24	68.6	1714.45	68.7	-41.1344	68.7	16.4539
68.8	12.7297	68.8	-1.76953	68.7	736.648	68.7	18.0359	68.7	2172.65	68.7	1714.66	68.8	-41.2211	68.8	16.468
68.9	12.8828	68.9	-1.76953	68.8	736.77	68.8	18.0391	68.8	2172.99	68.8	1714.87	68.9	-40.8571	68.9	16.4688
69	13.0383	69	-1.77423	68.9	736.906	68.9	18.0359	68.9	2173.36	68.9	1715.09	69	-40.5836	69	16.4852
69.1	13.2031	69.1	-1.78125	69	737.039	69	18.0406	69	2173.68	69	1715.3	69.1	-40.4758	69.1	16.4758
69.2	13.3438	69.2	-1.77344	69.1	737.16	69.1	18.0391	69.1	2174.02	69.1	1715.52	69.2	-40.3406	69.2	16.4774
69.3	13.4836	69.3	-1.77655	69.2	737.281	69.2	18.0477	69.2	2174.38	69.2	1715.69	69.3	-40.2484	69.3	16.4875
69.4	13.6086	69.4	-1.78125	69.3	737.394	69.3	18.0508	69.3	2174.72	69.3	1715.91	69.4	-40.1391	69.4	16.4883
69.5	13.7492	69.5	-1.76953	69.4	737.5	69.4	18.0485	69.4	2175.08	69.4	1716.11	69.5	-40.0258	69.5	16.4922
69.6	13.8945	69.6	-1.76953	69.5	737.634	69.5	18.0477	69.5	2175.41	69.5	1716.32	69.6	-39.9758	69.6	16.4875
69.7	14.0078	69.7	-1.76953	69.6	737.741	69.6	18.0313	69.6	2175.74	69.6	1716.51	69.7	-39.932	69.7	16.4852
69.8	14.1547	69.8	-1.77734	69.7	737.859	69.7	18.0242	69.7	2176.11	69.7	1716.72	69.8	-39.8297	69.8	16.4953
69.9	14.3125	69.9	-1.78906	69.8	737.98	69.8	18.0195	69.8	2176.45	69.8	1716.91	69.9	-39.7328	69.9	16.4922
70	14.457	70	-1.78906	69.9	738.102	69.9	18.0172	69.9	2176.83	69.9	1717.1	70	-39.6117	70	16.4805
70.1	14.6008	70.1	-1.79376	70	738.223	70	18.0195	70	2177.19	70	1717.28	70.1	-39.4734	70.1	16.4844
70.2	14.7609	70.2	-1.80078	70.1	738.304	70.1	18.0289	70.1	2177.54	70.1	1717.47	70.2	-39.35	70.2	16.4758
70.3	14.8867	70.3	-1.80078	70.2	738.441	70.2	18.0313	70.2	2177.89	70.2	1717.65	70.3	-39.2531	70.3	16.4727
70.4	15.0141	70.4	-1.80078	70.3	738.551	70.3	18.0242	70.3	2178.22	70.3	1717.87	70.4	-39.1664	70.4	16.4609
70.5	15.1641	70.5	-1.80078	70.4	738.656	70.4	18.0094	70.4	2178.55	70.4	1718.08	70.5	-39.0953	70.5	16.4562
70.6	15.3125	70.6	-1.80389	70.5	738.789	70.5	18.0117	70.5	2178.9	70.5	1718.29	70.6	-38.9906	70.6	16.4539
70.7	15.4688	70.7	-1.80078	70.6	738.906	70.6	18.0047	70.6	2179.26	70.6	1718.48	70.7	-38.8922	70.7	16.4562
70.8	15.6047	70.8	-1.80078	70.7	739.024	70.7	17.9969	70.7	2179.61	70.7	1718.66	70.8	-38.768	70.8	16.4539
70.9	15.7172	70.9	-1.80078	70.8	739.141	70.8	17.993	70.8	2179.93	70.8	1718.88	70.9	-38.6906	70.9	16.4562
71	15.8516	71	-1.79376	70.9	739.245	70.9	17.9883	70.9	2180.25	70.9	1719.08	71	-38.6195	71	16.4531
71.1	16.0109	71.1	-1.80078	71	739.34	71	17.9969	71	2180.57	71	1719.28	71.1	-38.5055	71.1	16.4383
71.2	16.1398	71.2	-1.80389	71.1	739.476	71.1	17.9899	71.1	2180.9	71.1	1719.46	71.2	-38.3891	71.2	16.4367
71.3	16.2539	71.3	-1.80548	71.2	739.609	71.2	17.9922	71.2	2181.22	71.2	1719.67	71.3	-38.275	71.3	16.4219
71.4	16.4016	71.4	-1.82031	71.3	739.73	71.3	17.9852	71.3	2181.54	71.3	1719.86	71.4	-38.1703	71.4	16.4172
71.5	16.5352	71.5	-1.8125	71.4	739.852	71.4	17.9805	71.4	2181.88	71.4	1720.05	71.5	-38.0492	71.5	16.4149
71.6	16.6711	71.6	-1.8172	71.5	739.969	71.5	17.9813	71.5	2182.22	71.5	1720.24	71.6	-37.9516	71.6	16.4141
71.7	16.8	71.7	-1.82733	71.6	740.102	71.6	17.9899	71.6	2182.54	71.6	1720.41	71.7	-37.8531	71.7	16.4008
71.8	16.9172	71.8	-1.83203	71.7	740.191	71.7	17.9805	71.7	2182.85	71.7	1720.62	71.8	-37.768	71.8	16.3906
71.9	17.0594	71.9	-1.82031	71.8	740.299	71.8	17.9774	71.8	2183.17	71.8	1720.76	71.9	-37.6828	71.9	16.3836
72	17.2023	72	-1.82813	71.9	740.395	71.9	17.9805	71.9	2183.48	71.9	1720.93	72	-37.5563	72	16.3906
72.1	17.3391	72.1	-1.83984	72	740.512	72	17.9781	72	2183.79	72	1721.1	72.1	-37.518	72.1	16.3976
72.2	17.4727	72.2	-1.83282	72.1	740.616	72.1	17.9805	72.1	2184.11	72.1	1721.28	72.2	-37.4821	72.2	16.3875
72.3	17.6008	72.3	-1.85938	72.2	740.699	72.2	17.9899	72.2	2184.4	72.2	1721.46	72.3	-37.4203	72.3	16.3828
72.4	17.7297	72.4	-1.87109	72.3	740.796	72.3	17.993	72.3	2184.73	72.3	1721.6	72.4	-37.3227	72.4	16.3617
72.5	17.8633	72.5	-1.87421	72.4	740.898	72.4	18	72.4	2185.06	72.4	1721.76	72.5	-37.236	72.5	16.3563
72.6	17.9992	72.6	-1.88361	72.5	740.995	72.5	18.0047	72.5	2185.37	72.5	1722.01	72.6	-37.1781	72.6	16.3547
72.7	18.1172	72.7	-1.89532	72.6	741.094	72.6	18.0094	72.6	2185.67	72.6	1722.21	72.7	-37.1078	72.7	16.3445
72.8	18.2445	72.8	-1.90546	72.7	741.175	72.7	18.0117	72.7	2185.97	72.7	1722.41	72.8	-37.0297	72.8	16.3469
72.9	18.3875	72.9	-1.91486	72.8	741.27	72.8	18.0094	72.8	2186.26	72.8	1722.61	72.9	-36.9469	72.9	16.3398
73	18.5226	73	-1.92188	72.9	741.383	72.9	18.0117	72.9	2186.55	72.9	1722.82	73	-36.8258	73	16.332
73.1	18.6711	73.1	-1.92499	73	741.488	73	18.0195	73	2186.87	73	1723	73.1	-36.7063	73.1	16.3156
73.2	18.8047	73.2	-1.93439	73.1	741.585	73.1	18.0172	73.1	2187.19	73.1	1723.19	73.2	-36.6071	73.2	16.3008
73.3	18.9406	73.3	-1.94452	73.2	741.677	73.2	18.0164	73.2	2187.52	73.2	1723.37	73.3	-36.486	73.3	16.3055
73.4	19.0969	73.4	-1.95392	73.3	741.788	73.3	18.0195	73.3	2187.86	73.3	1723.57	73.4	-36.3891	73.4	16.2961
73.5	19.2539	73.5	-1.96564	73.4	741.898	73.4	18.0211	73.4	2188.14	73.4	1723.74	73.5	-36.3024	73.5	16.293
73.6	19.3898	73.6	-1.97577	73.5	741.997	73.5	18.0195	73.5	2188.45	73.5	1723.93	73.6	-36.2094	73.6	16.2844
73.7	19.5383	73.7	-1.99219	73.6	742.105	73.6	18.0406	73.6	2188.78	73.6	1724.1	73.7	-36.1117	73.7	16.2859
73.8	19.6688	73.8	-1.98517	73.7	742.226	73.7	18.043	73.7	2189.11	73.7	1724.29	73.8	-36.0102	73.8	16.2766
73.9	19.8195	73.9	-2.00702	73.8	742.317	73.8	18.0508	73.8	2189.45	73.8	1724.47	73.9	-35.9156	73.9	16.2742
74	19.9648	74	-2.01642	73.9	742.422	73.9	18.0438	73.9	2189.78	73.9	1724.63	74	-35.8141	74	16.2766
74.1	20.1008	74.1	-2.03436	74	742.527	74	18.0242	74	2190.13	74	1724.78	74.1	-35.7289	74.1	16.2664
74.2	20.2219	74.2	-2.04376	74.1	742.621	74.1	18.0289	74.1	2190.45	74.1	1724.93	74.2	-35.6555	74.2	16.2813
74.3	20.3555	74.3	-2.05389	74.2	742.734	74.2	18.0313	74.2	2190.74	74.2	1725.12	74.3	-35.5641	74.3	16.2883
74.4	20.5023	74.4	-2.05859	74.3	742.844	74.3	18.0359	74.3	2191.03	74.3	1725.32	74.4	-35.4742	74.4	16.2781
74.5	20.6523	74.5	-2.06329	74.4	742.94	74.4	18.0359	74.4	2191.34	74.4	1725.5	74.5	-35.3571	74.5	16.2766
74.6	20.7969	74.6	-2.08673	74.5	743.039	74.5	18.0359	74.5	2191.67	74.5	1725.66	74.6	-35.257	74.6	16.2844
74.7	20.9367	74.7	-2.09375	74.6	743.153	74.6	18.0438	74.6	2191.97	74.6	1725.85	74.7	-35.1656	74.7	16.2859
74.8	21.1086	74.8	-2.10468	74.7	743.262	74.7	18.0391	74.7	2192.28	74.7	1726	74.8	-35.0727	74.8	16.2813
74.9	21.2813	74.9	-2.10938	74.8	743.37	74.8	18.0485	74.8	2192.61	74.8	1726.17	74.9	-34.95	74.9	16.2961
75	21.4484	75	-2.12579	74.9	743.488	74.9	18.0508	74.9	2192.92	74.9	1726.34	75	-34.8695	75	16.2859
75.1	21.6133	75.1	-2.13593	75	743.578	75	18.0485	75	2193.21	75	1726.53	75.1	-34.7906	75.1	16.2844
75.2	21.7609	75.2	-2.14063	75.1	743.677	75.1	18.0508	75.1	2193.5	75.1	1726.73	75.2	-34.7141	75.2	16.2859
75.3	21.9141	75.3	-2.14532	75.2	743.78	75.2	18.0555	75.2	2193.82	75.2	1726.93	75.3	-34.6219	75.3	16.2883
75.4	22.0773	75.4	-2.15234	75.3	743.867	75.3	18.0391	75.3	2194.14	75.3	1727.1	75.4	-34.5414	75.4	16.2859
75.5	22.2391	75.5	-2.15234	75.4	743.98	75.4	18.0485	75.4	2194.42	75.4	1727.3	75.5	-34.443	75.5	16.2883
75.6	22.3508	75.6	-2.15546	75.5	744.098	75.5	18.0508	75.5	2194.7	75.5	1727.46	75.6	-34.3578	75.6	16.2891
75.7	22.507	75.7	-2.16016	75.6	744.211	75.6	18.0485	75.6	2194.97	75.6	1727.67	75.7	-34.2992	75.7	16.2844
75.8	22.6641	75.8	-2.16486	75.7	744.309	75.7	18.0703	75.7	2195.28	75.7	1727.84	75.8	-34.193	75.8	16.2859
75.9	22.7852	75.9	-2.17188	75.8	744.41	75.8	18.0719	75.8	2195.58	75.8	1728.01	75.9	-34.0735	75.9	16.2844
76	22.9289	76	-2.17499	75.9	744.503	75.9	18.0656	75.9	2195.82	75.9	1728.19	76	-33.9422	76	16.2859
76.1	23.0938	76.1	-2.17969	76	744.614	76	18.0602	76	2196.1	76	1728.36	76.1	-33.8156	76.1	16.2813
76.2	23.257	76.2	-2.17969	76.1	744.729	76.1	18.0672	76.1	2196.39	76.1	1728.51	76.2	-33.6891	76.2	16.2883
76.3	23.3945	76.3	-2.17969	76.2	744.82	76.2	18.0586	76.2	2196.67	76.2	1728.68	76.3	-33.5688	76.3	16.2859
76.4	23.5273	76.4	-2.1922	76.3	744.91	76.3	18.0719	76.3	2196.96	76.3	1728.81	76.4	-33.4274	76.4	16.2766
76.5	23.6664	76.5	-2.19922	76.4	745	76.4	18.0703	76.4	2197.23	76.4	1728.96	76.5	-33.3063	76.5	16.2813
76.6	23.8195	76.6	-2.21094	76.5	745.078	76.5	18.0672	76.5	2197.53	76.5	1729.07	76.6	-33.2047	76.6	16.2734
76.7	23.9578	76.7	-2.21564	76.6	745.136	76.6	18.0586	76.6	2197.86	76.6	1729.2	76.7	-33.136	76.7	16.2648
76.8	24.0961	76.8	-2.22266	76.7	745.219	76.7	18.0602	76.7	2198.17	76.7	1729.35	76.8	-33.0485	76.8	16.2664
76.9	24.207	76.9	-2.22577	76.8	745.286	76.8	18.0555	76.8	2198.46	76.8	1729.5	76.9	-32.9586	76.9	16.2617
77	24.3117	77	-2.23047	76.9	745.386	76.9	18.0477	76.9	2198.75	76.9	1729.67	77	-32.8734	77	16.2648
77.1	24.4016	77.1	-2.24298	77	745.461	77	18.0391	77	2199.06	77	1729.82	77.1	-32.7946	77.1	16.2617
77.2	24.5156	77.2	-2.25	77.1	745.539	77.1	18.0242	77.1	2199.35	77.1	1729.99	77.2	-32.7094	77.2	16.2469
77.3	24.6516	77.3	-2.25	77.2	745.641	77.2	18.0195	77.2	2199.64	77.2	1730.15	77.3	-32.6024	77.3	16.2453
77.4	24.7726	77.4	-2.2453	77.3	745.741	77.3	18.0289	77.3	2199.94	77.3	1730.3	77.4	-32.4906	77.4	16.2422
77.5	24.875	77.5	-2.25781	77.4	745.828	77.4	18.0195	77.4	2200.25	77.4	1730.48	77.5	-32.3844	77.5	16.2258
77.6	24.975	77.6	-2.26251	77.5	745.918	77.5	18.0211	77.5	2200.53	77.5	1730.63	77.6	-32.2844	77.6	16.2274
77.7	25.0984	77.7	-2.26953	77.6	746.02	77.6	18.0195	77.6	2200.79	77.6	1730.77	77.7	-32.1852	77.7	16.218
77.8	25.2531	77.8	-2.28125	77.7	746.141	77.7	18.0125	77.7	2201.07	77.7	1730.95	77.8	-32.0805	77.8	16.2188
77.9	25.3703	77.9	-2.28436	77.8	746.219	77.8	18.0211	77.8	2201.35	77.8	1731.09	77.9	-31.9703	77.9	16.2156
78	25.5109	78	-2.28906	77.9	746.332	77.9	18.0313	77.9	2201.64	77.9	1731.21	78	-31.8813	78	16.2062
78.1	25.6641	78.1	-2.29376	78	746.402	78	18.0313	78	2201.9	78	1731.33	78.1	-31.7399	78.1	16.2109
78.2	25.8078	78.2	-2.30078	78.1	746.515	78.1	18.0289	78.1	2202.19	78.1	1731.47	78.2	-31.6071	78.2	16.2156
78.3	25.9336	78.3	-2.30548	78.2	746.59	78.2	18.0359	78.2	2202.47	78.2	1731.59	78.3	-31.4899	78.3	16.2062
78.4	26.0625	78.4	-2.3125	78.3	746.672	78.3	18.0359	78.3	2202.75	78.3	1731.71	78.4	-31.3813	78.4	16.2109
78.5	26.2023	78.5	-2.3125	78.4	746.762	78.4	18.0508	78.4	2203	78.4	1731.84	78.5	-31.2946	78.5	16.2031
78.6	26.3508	78.6	-2.3125	78.5	746.886	78.5	18.0485	78.5	2203.28	78.5	1731.98	78.6	-31.182	78.6	16.1945
78.7	26.4844	78.7	-2.31561	78.6	746.984	78.6	18.0578	78.6	2203.58	78.6	1732.12	78.7	-31.0828	78.7	16.1992
78.8	26.6055	78.8	-2.32501	78.7	747.07	78.7	18.0485	78.7	2203.86	78.7	1732.26	78.8	-30.9789	78.8	16.2039
78.9	26.7414	78.9	-2.33203	78.8	747.145	78.8	18.0555	78.8	2204.13	78.8	1732.39	78.9	-30.8891	78.9	16.2109
79	26.8976	79	-2.33514	78.9	747.25	78.9	18.0477	78.9	2204.39	78.9	1732.54	79	-30.8141	79	16.2062
79.1	27.0305	79.1	-2.33984	79	747.352	79	18.0391	79	2204.67	79	1732.68	79.1	-30.7367	79.1	16.2031
79.2	27.1641	79.2	-2.34454	79.1	747.459	79.1	18.0359	79.1	2204.96	79.1	1732.85	79.2	-30.6461	79.2	16.1914
79.3	27.3195	79.3	-2.35156	79.2	747.547	79.2	18.0242	79.2	2205.21	79.2	1733.02	79.3	-30.5656	79.3	16.1836
79.4	27.4531	79.4	-2.35468	79.3	747.648	79.3	18.0195	79.3	2205.43	79.3	1733.18	79.4	-30.4734	79.4	16.175
79.5	27.6086	79.5	-2.36407	79.4	747.735	79.4	18.0242	79.4	2205.7	79.4	1733.37	79.5	-30.3695	79.5	16.1649
79.6	27.7586	79.6	-2.37109	79.5	747.816	79.5	18.0125	79.5	2205.95	79.5	1733.52	79.6	-30.2523	79.6	16.1555
79.7	27.8852	79.7	-2.37421	79.6	747.883	79.6	18.0289	79.6	2206.22	79.6	1733.69	79.7	-30.1414	79.7	16.1602
79.8	28.0039	79.8	-2.38361	79.7	747.964	79.7	18.0164	79.7	2206.44	79.7	1733.84	79.8	-30.0367	79.8	16.1523
79.9	28.1398	79.9	-2.39063	79.8	748.083	79.8	18.0117	79.8	2206.69	79.8	1734.04	79.9	-29.9398	79.9	16.1484
80	28.2734	80	-2.39063	79.9	748.195	79.9	18.0078	79.9	2206.96	79.9	1734.16	80	-29.8297	80	16.1406
80.1	28.4094	80.1	-2.39532	80	748.281	80	18.0047	80	2207.22	80	1734.29	80.1	-29.7172	80.1	16.1359
80.2	28.5625	80.2	-2.40234	80.1	748.359	80.1	18.0047	80.1	2207.49	80.1	1734.44	80.2	-29.6469	80.2	16.1336
80.3	28.7062	80.3	-2.40546	80.2	748.445	80.2	18.0094	80.2	2207.76	80.2	1734.57	80.3	-29.5805	80.3	16.1359
80.4	28.8633	80.4	-2.41016	80.3	748.578	80.3	18.0117	80.3	2208.04	80.3	1734.71	80.4	-29.4828	80.4	16.1328
80.5	29.0156	80.5	-2.40314	80.4	748.673	80.4	18.0094	80.4	2208.3	80.4	1734.85	80.5	-29.3688	80.5	16.1289
80.6	29.1672	80.6	-2.42499	80.5	748.788	80.5	18.0117	80.5	2208.55	80.5	1734.99	80.6	-29.2711	80.6	16.1328
80.7	29.3047	80.7	-2.42969	80.6	748.922	80.6	18.0078	80.6	2208.81	80.6	1735.13	80.7	-29.1656	80.7	16.1289
80.8	29.4648	80.8	-2.42267	80.7	749.031	80.7	18.0094	80.7	2209.07	80.7	1735.25	80.8	-29.0609	80.8	16.1375
80.9	29.6008	80.9	-2.44141	80.8	749.141	80.8	18.0078	80.8	2209.35	80.8	1735.4	80.9	-28.9516	80.9	16.1476
81	29.7539	81	-2.44452	80.9	749.241	80.9	18.0047	80.9	2209.63	80.9	1735.55	81	-28.8367	81	16.1523
81.1	29.9047	81.1	-2.4375	81	749.367	81	18.0047	81	2209.9	81	1735.72	81.1	-28.7156	81.1	16.1523
81.2	30.0594	81.2	-2.4375	81.1	749.488	81.1	18.0047	81.1	2210.18	81.1	1735.89	81.2	-28.6047	81.2	16.1602
81.3	30.2133	81.3	-2.4422	81.2	749.559	81.2	18.0016	81.2	2210.45	81.2	1736.04	81.3	-28.5289	81.3	16.1641
81.4	30.3406	81.4	-2.44922	81.3	749.636	81.3	18	81.3	2210.7	81.3	1736.2	81.4	-28.4125	81.4	16.1602
81.5	30.475	81.5	-2.45233	81.4	749.723	81.4	17.9969	81.4	2210.95	81.4	1736.34	81.5	-28.3016	81.5	16.1719
81.6	30.618	81.6	-2.46173	81.5	749.816	81.5	17.9852	81.5	2211.2	81.5	1736.46	81.6	-28.2063	81.6	16.1914
81.7	30.7805	81.7	-2.47345	81.6	749.879	81.6	17.9805	81.6	2211.45	81.6	1736.6	81.7	-28.0828	81.7	16.1945
81.8	30.9336	81.8	-2.48358	81.7	749.941	81.7	17.9703	81.7	2211.7	81.7	1736.75	81.8	-27.9547	81.8	16.1961
81.9	31.0773	81.9	-2.48828	81.8	750.015	81.8	17.9656	81.8	2211.94	81.8	1736.88	81.9	-27.8422	81.9	16.1984
82	31.2422	82	-2.48828	81.9	750.09	81.9	17.9727	81.9	2212.22	81.9	1737	82	-27.725	82	16.1992
82.1	31.3867	82.1	-2.5047	82	750.157	82	17.9578	82	2212.49	82	1737.16	82.1	-27.5953	82.1	16.2141
82.2	31.5187	82.2	-2.51172	82.1	750.218	82.1	17.9461	82.1	2212.76	82.1	1737.28	82.2	-27.5289	82.2	16.2039
82.3	31.6359	82.3	-2.51483	82.2	750.289	82.2	17.9414	82.2	2213.01	82.2	1737.41	82.3	-27.4125	82.3	16.2062
82.4	31.7734	82.4	-2.51953	82.3	750.359	82.3	17.9391	82.3	2213.26	82.3	1737.5	82.4	-27.3063	82.4	16.2156
82.5	31.8976	82.5	-2.52423	82.4	750.441	82.4	17.9414	82.4	2213.51	82.4	1737.61	82.5	-27.2164	82.5	16.2062
82.6	32.0352	82.6	-2.53125	82.5	750.52	82.5	17.9266	82.5	2213.78	82.5	1737.73	82.6	-27.0953	82.6	16.2109
82.7	32.1641	82.7	-2.53436	82.6	750.613	82.6	17.918	82.6	2214.05	82.6	1737.85	82.7	-27.0289	82.7	16.2078
82.8	32.2805	82.8	-2.53906	82.7	750.711	82.7	17.9196	82.7	2214.33	82.7	1737.97	82.8	-26.9398	82.8	16.2062
82.9	32.4172	82.9	-2.54376	82.8	750.801	82.8	17.9219	82.8	2214.61	82.8	1738.07	82.9	-26.8734	82.9	16.2062
83	32.5789	83	-2.55078	82.9	750.894	82.9	17.9196	82.9	2214.88	82.9	1738.22	83	-26.7985	83	16.2109
83.1	32.7101	83.1	-2.53906	83	750.985	83	17.9102	83	2215.14	83	1738.35	83.1	-26.7477	83.1	16.1961
83.2	32.8391	83.2	-2.54376	83.1	751.054	83.1	17.9117	83.1	2215.36	83.1	1738.46	83.2	-26.643	83.2	16.2062
83.3	32.9891	83.3	-2.56561	83.2	751.165	83.2	17.9102	83.2	2215.63	83.2	1738.57	83.3	-26.5516	83.3	16.2078
83.4	33.1398	83.4	-2.57031	83.3	751.252	83.3	17.9031	83.3	2215.87	83.3	1738.7	83.4	-26.4875	83.4	16.2062
83.5	33.2805	83.5	-2.57501	83.4	751.344	83.4	17.9102	83.4	2216.13	83.4	1738.87	83.5	-26.4109	83.5	16.2078
83.6	33.4094	83.6	-2.58203	83.5	751.422	83.5	17.9	83.5	2216.4	83.5	1739.01	83.6	-26.3422	83.6	16.2062
83.7	33.543	83.7	-2.58514	83.6	751.527	83.6	17.9102	83.6	2216.65	83.6	1739.14	83.7	-26.2602	83.7	16.2141
83.8	33.7031	83.8	-2.59454	83.7	751.597	83.7	17.9	83.7	2216.91	83.7	1739.28	83.8	-26.1774	83.8	16.2156
83.9	33.8391	83.9	-2.60156	83.8	751.668	83.8	17.8984	83.8	2217.14	83.8	1739.39	83.9	-26.0758	83.9	16.2141
84	33.9844	84	-2.60468	83.9	751.75	83.9	17.8953	83.9	2217.39	83.9	1739.5	84	-25.9977	84	16.2156
84.1	34.0891	84.1	-2.60938	84	751.82	84	17.8922	84	2217.65	84	1739.61	84.1	-25.8844	84.1	16.218
84.2	34.2344	84.2	-2.60938	84.1	751.891	84.1	17.8906	84.1	2217.91	84.1	1739.74	84.2	-25.7961	84.2	16.2109
84.3	34.382	84.3	-2.61407	84.2	752	84.2	17.8836	84.2	2218.17	84.2	1739.87	84.3	-25.7086	84.3	16.2109
84.4	34.5039	84.4	-2.62109	84.3	752.07	84.3	17.8953	84.3	2218.42	84.3	1740	84.4	-25.5992	84.4	16.2188
84.5	34.6352	84.5	-2.62421	84.4	752.152	84.4	17.8875	84.4	2218.67	84.4	1740.09	84.5	-25.4742	84.5	16.2258
84.6	34.7781	84.6	-2.62891	84.5	752.245	84.5	17.8789	84.5	2218.96	84.5	1740.2	84.6	-25.3961	84.6	16.2234
84.7	34.9289	84.7	-2.63361	84.6	752.332	84.6	17.8836	84.6	2219.21	84.6	1740.31	84.7	-25.3274	84.7	16.2305
84.8	35.0352	84.8	-2.64063	84.7	752.402	84.7	17.8953	84.7	2219.46	84.7	1740.4	84.8	-25.2352	84.8	16.2422
84.9	35.1516	84.9	-2.65704	84.8	752.461	84.8	17.8789	84.8	2219.71	84.8	1740.5	84.9	-25.1438	84.9	16.2375
85	35.2852	85	-2.66406	84.9	752.561	84.9	17.8805	84.9	2220	84.9	1740.63	85	-25.0555	85	16.2352
85.1	35.393	85.1	-2.66718	85	752.66	85	17.8758	85	2220.23	85	1740.79	85.1	-24.9438	85.1	16.2375
85.2	35.5313	85.2	-2.68439	85.1	752.755	85.1	17.8711	85.1	2220.49	85.1	1740.89	85.2	-24.8571	85.2	16.2383
85.3	35.6672	85.3	-2.69141	85.2	752.871	85.2	17.8688	85.2	2220.72	85.2	1741.03	85.3	-24.7938	85.3	16.2305
85.4	35.793	85.4	-2.69452	85.3	752.956	85.3	17.8711	85.3	2220.95	85.3	1741.13	85.4	-24.7094	85.4	16.2258
85.5	35.9141	85.5	-2.71094	85.4	753.054	85.4	17.861	85.4	2221.19	85.4	1741.26	85.5	-24.643	85.5	16.2234
85.6	36.05	85.6	-2.71564	85.5	753.137	85.5	17.8711	85.5	2221.44	85.5	1741.39	85.6	-24.5453	85.6	16.2227
85.7	36.1641	85.7	-2.72266	85.6	753.216	85.6	17.8563	85.6	2221.65	85.6	1741.51	85.7	-24.4539	85.7	16.2062
85.8	36.3242	85.8	-2.73358	85.7	753.316	85.7	17.8594	85.7	2221.89	85.7	1741.62	85.8	-24.3297	85.8	16.2031
85.9	36.4633	85.9	-2.74298	85.8	753.41	85.8	17.861	85.8	2222.11	85.8	1741.76	85.9	-24.2086	85.9	16.1961
86	36.5984	86	-2.76172	85.9	753.512	85.9	17.8594	85.9	2222.35	85.9	1741.88	86	-24.0992	86	16.1867
86.1	36.7297	86.1	-2.75311	86	753.605	86	17.8641	86	2222.58	86	1742.02	86.1	-23.9828	86.1	16.1867
86.2	36.8781	86.2	-2.77423	86.1	753.68	86.1	17.8688	86.1	2222.82	86.1	1742.16	86.2	-23.8766	86.2	16.1797
86.3	37.0399	86.3	-2.78595	86.2	753.762	86.2	17.8711	86.2	2223.05	86.2	1742.29	86.3	-23.7711	86.3	16.1649
86.4	37.1828	86.4	-2.79297	86.3	753.855	86.3	17.861	86.3	2223.26	86.3	1742.41	86.4	-23.6383	86.4	16.1672
86.5	37.3164	86.5	-2.80389	86.4	753.941	86.4	17.8711	86.4	2223.51	86.4	1742.53	86.5	-23.4977	86.5	16.1602
86.6	37.4633	86.6	-2.81329	86.5	754.012	86.5	17.8711	86.5	2223.73	86.5	1742.66	86.6	-23.393	86.6	16.1602
86.7	37.6133	86.7	-2.83514	86.6	754.09	86.6	17.8805	86.6	2223.96	86.6	1742.81	86.7	-23.282	86.7	16.1602
86.8	37.7656	86.8	-2.83984	86.7	754.195	86.7	17.8836	86.7	2224.21	86.7	1742.92	86.8	-23.1891	86.8	16.1602
86.9	37.8976	86.9	-2.84766	86.8	754.25	86.8	17.8875	86.8	2224.43	86.8	1743.04	86.9	-23.0774	86.9	16.1641
87	38.0461	87	-2.86407	86.9	754.344	86.9	17.8836	86.9	2224.67	86.9	1743.15	87	-22.9781	87	16.1555
87.1	38.1836	87.1	-2.87109	87	754.432	87	17.8906	87	2224.92	87	1743.3	87.1	-22.8641	87.1	16.157
87.2	38.3242	87.2	-2.87421	87.1	754.485	87.1	17.9	87.1	2225.16	87.1	1743.41	87.2	-22.7602	87.2	16.1555
87.3	38.4648	87.3	-2.88361	87.2	754.563	87.2	17.9023	87.2	2225.4	87.2	1743.53	87.3	-22.6774	87.3	16.1453
87.4	38.6133	87.4	-2.90234	87.3	754.644	87.3	17.8984	87.3	2225.62	87.3	1743.65	87.4	-22.5797	87.4	16.1476
87.5	38.7414	87.5	-2.90704	87.4	754.738	87.4	17.9	87.4	2225.86	87.4	1743.76	87.5	-22.4828	87.5	16.1484
87.6	38.875	87.6	-2.92499	87.5	754.825	87.5	17.9031	87.5	2226.1	87.5	1743.89	87.6	-22.4274	87.6	16.1406
87.7	38.9914	87.7	-2.93439	87.6	754.901	87.6	17.907	87.6	2226.35	87.6	1743.99	87.7	-22.3539	87.7	16.1406
87.8	39.1203	87.8	-2.94452	87.7	754.969	87.7	17.8953	87.7	2226.56	87.7	1744.09	87.8	-22.2906	87.8	16.1445
87.9	39.2539	87.9	-2.94922	87.8	755.059	87.8	17.8984	87.8	2226.79	87.8	1744.21	87.9	-22.1766	87.9	16.1406
88	39.3664	88	-2.95392	87.9	755.129	87.9	17.8883	87.9	2227.03	87.9	1744.35	88	-22.0844	88	16.1359
88.1	39.5039	88.1	-2.96094	88	755.211	88	17.8906	88	2227.26	88	1744.49	88.1	-21.9899	88.1	16.1375
88.2	39.6672	88.2	-2.96405	88.1	755.289	88.1	17.8758	88.1	2227.5	88.1	1744.61	88.2	-21.9422	88.2	16.1359
88.3	39.7883	88.3	-2.96875	88.2	755.383	88.2	17.8641	88.2	2227.71	88.2	1744.73	88.3	-21.8492	88.3	16.1211
88.4	39.9266	88.4	-2.98517	88.3	755.445	88.3	17.8711	88.3	2227.92	88.3	1744.83	88.4	-21.7375	88.4	16.1211
88.5	40.0773	88.5	-2.9953	88.4	755.52	88.4	17.861	88.4	2228.16	88.4	1744.95	88.5	-21.6609	88.5	16.1133
88.6	40.2148	88.6	-3.0047	88.5	755.582	88.5	17.8594	88.5	2228.4	88.5	1745.05	88.6	-21.568	88.6	16.1016
88.7	40.3359	88.7	-3.00702	88.6	755.613	88.6	17.8492	88.6	2228.65	88.6	1745.14	88.7	-21.432	88.7	16.1164
88.8	40.4875	88.8	-3.00781	88.7	755.68	88.7	17.8563	88.7	2228.9	88.7	1745.25	88.8	-21.3344	88.8	16.1063
88.9	40.6445	88.9	-3.00781	88.8	755.743	88.8	17.8594	88.8	2229.12	88.8	1745.36	88.9	-21.2203	88.9	16.1164
89	40.7758	89	-3.0047	88.9	755.781	88.9	17.8492	88.9	2229.32	88.9	1745.46	89	-21.1266	89	16.1016
89.1	40.9219	89.1	-3.01953	89	755.866	89	17.8398	89	2229.55	89	1745.55	89.1	-21.0367	89.1	16.0969
89.2	41.0742	89.2	-3.01953	89.1	755.93	89.1	17.8367	89.1	2229.78	89.1	1745.63	89.2	-20.9352	89.2	16.0945
89.3	41.2031	89.3	-3.01953	89.2	755.98	89.2	17.8281	89.2	2229.97	89.2	1745.74	89.3	-20.8469	89.3	16.0851
89.4	41.3344	89.4	-3.01953	89.3	756.043	89.3	17.818	89.3	2230.19	89.3	1745.86	89.4	-20.7547	89.4	16.0867
89.5	41.4531	89.5	-3.03125	89.4	756.112	89.4	17.8203	89.4	2230.43	89.4	1745.98	89.5	-20.6578	89.5	16.0898
89.6	41.5867	89.6	-3.03125	89.5	756.16	89.5	17.818	89.5	2230.64	89.5	1746.13	89.6	-20.5602	89.6	16.0851
89.7	41.7562	89.7	-3.03906	89.6	756.212	89.6	17.8203	89.6	2230.87	89.6	1746.26	89.7	-20.4516	89.7	16.082
89.8	41.8945	89.8	-3.03906	89.7	756.304	89.7	17.8102	89.7	2231.08	89.7	1746.41	89.8	-20.3883	89.8	16.0672
89.9	42.0156	89.9	-3.03906	89.8	756.379	89.8	17.8125	89.8	2231.31	89.8	1746.57	89.9	-20.2985	89.9	16.0656
90	42.1476	90	-3.04376	89.9	756.449	89.9	17.8086	89.9	2231.57	89.9	1746.7	90	-20.2164	90	16.0656
90.1	42.2656	90.1	-3.0625	90	756.531	90	17.7985	90	2231.79	90	1746.84	90.1	-20.1313	90.1	16.0555
90.2	42.3781	90.2	-3.07422	90.1	756.624	90.1	17.8008	90.1	2232	90.1	1746.98	90.2	-20.0406	90.2	16.0508
90.3	42.5086	90.3	-3.07422	90.2	756.719	90.2	17.7985	90.2	2232.23	90.2	1747.12	90.3	-19.9438	90.3	16.0539
90.4	42.6203	90.4	-3.07733	90.3	756.789	90.3	17.7891	90.3	2232.45	90.3	1747.24	90.4	-19.8492	90.4	16.0586
90.5	42.7687	90.5	-3.08203	90.4	756.884	90.4	17.7789	90.4	2232.7	90.4	1747.37	90.5	-19.7711	90.5	16.0672
90.6	42.8945	90.6	-3.08673	90.5	756.964	90.5	17.7813	90.5	2232.91	90.5	1747.47	90.6	-19.6813	90.6	16.0656
90.7	43.007	90.7	-3.10156	90.6	757.059	90.6	17.7742	90.6	2233.15	90.6	1747.62	90.7	-19.6102	90.7	16.0672
90.8	43.1133	90.8	-3.10156	90.7	757.141	90.7	17.7711	90.7	2233.36	90.7	1747.71	90.8	-19.5578	90.8	16.0656
90.9	43.2227	90.9	-3.10156	90.8	757.199	90.8	17.7695	90.8	2233.58	90.8	1747.82	90.9	-19.4656	90.9	16.0672
91	43.3555	91	-3.10468	90.9	757.265	90.9	17.7695	90.9	2233.78	90.9	1747.92	91	-19.3813	91	16.0773
91.1	43.4828	91.1	-3.12109	91	757.352	91	17.7594	91	2233.99	91	1748.04	91.1	-19.2906	91.1	16.0656
91.2	43.6297	91.2	-3.12109	91.1	757.41	91.1	17.75	91.1	2234.21	91.1	1748.14	91.2	-19.2008	91.2	16.075
91.3	43.7687	91.3	-3.12579	91.2	757.472	91.2	17.7477	91.2	2234.44	91.2	1748.25	91.3	-19.1266	91.3	16.0703
91.4	43.9063	91.4	-3.14063	91.3	757.544	91.3	17.7383	91.3	2234.64	91.3	1748.35	91.4	-19.0414	91.4	16.0742
91.5	44.0695	91.5	-3.13281	91.4	757.633	91.4	17.743	91.4	2234.85	91.4	1748.43	91.5	-18.907	91.5	16.0703
91.6	44.1984	91.6	-3.13281	91.5	757.695	91.5	17.7399	91.5	2235.06	91.5	1748.51	91.6	-18.8063	91.6	16.0773
91.7	44.332	91.7	-3.13593	91.6	757.774	91.6	17.75	91.6	2235.3	91.6	1748.61	91.7	-18.6891	91.7	16.075
91.8	44.4727	91.8	-3.14063	91.7	757.866	91.7	17.743	91.7	2235.51	91.7	1748.67	91.8	-18.5805	91.8	16.0773
91.9	44.625	91.9	-3.14532	91.8	757.964	91.8	17.7352	91.8	2235.74	91.8	1748.73	91.9	-18.4586	91.9	16.0781
92	44.7805	92	-3.15234	91.9	758.075	91.9	17.7234	91.9	2235.96	91.9	1748.81	92	-18.3688	92	16.0851
92.1	44.9094	92.1	-3.15234	92	758.183	92	17.7305	92	2236.21	92	1748.9	92.1	-18.2445	92.1	16.0867
92.2	45.043	92.2	-3.15546	92.1	758.238	92.1	17.7313	92.1	2236.42	92.1	1748.98	92.2	-18.1453	92.2	16.0851
92.3	45.1789	92.3	-3.16016	92.2	758.313	92.2	17.7399	92.2	2236.64	92.2	1749.08	92.3	-18.0446	92.3	16.0867
92.4	45.3125	92.4	-3.16486	92.3	758.394	92.3	17.743	92.3	2236.87	92.3	1749.16	92.4	-17.9586	92.4	16.0851
92.5	45.4648	92.5	-3.17188	92.4	758.469	92.4	17.7547	92.4	2237.11	92.4	1749.26	92.5	-17.8492	92.5	16.0867
92.6	45.5844	92.6	-3.17188	92.5	758.551	92.5	17.7742	92.5	2237.33	92.5	1749.36	92.6	-17.7477	92.6	16.0851
92.7	45.7031	92.7	-3.17188	92.6	758.605	92.6	17.7891	92.6	2237.53	92.6	1749.45	92.7	-17.6422	92.7	16.0867
92.8	45.8469	92.8	-3.17657	92.7	758.668	92.7	17.7906	92.7	2237.72	92.7	1749.58	92.8	-17.5336	92.8	16.0851
92.9	45.9727	92.9	-3.18359	92.8	758.758	92.8	17.7891	92.8	2237.93	92.8	1749.68	92.9	-17.407	92.9	16.0898
93	46.118	93	-3.18671	92.9	758.84	92.9	17.7938	92.9	2238.13	92.9	1749.79	93	-17.2906	93	16.0969
93.1	46.2523	93.1	-3.19922	93	758.913	93	17.8102	93	2238.32	93	1749.91	93.1	-17.1742	93.1	16.0945
93.2	46.3875	93.2	-3.19922	93.1	758.993	93.1	17.8203	93.1	2238.5	93.1	1750.01	93.2	-17.0867	93.2	16.1094
93.3	46.5234	93.3	-3.19922	93.2	759.102	93.2	17.8203	93.2	2238.7	93.2	1750.11	93.3	-16.9821	93.3	16.1164
93.4	46.6547	93.4	-3.20392	93.3	759.183	93.3	17.8211	93.3	2238.9	93.3	1750.21	93.4	-16.8563	93.4	16.1258
93.5	46.7859	93.5	-3.21094	93.4	759.274	93.4	17.8328	93.4	2239.09	93.4	1750.31	93.5	-16.725	93.5	16.1281
93.6	46.9289	93.6	-3.21405	93.5	759.374	93.5	17.8375	93.5	2239.3	93.5	1750.4	93.6	-16.6266	93.6	16.1258
93.7	47.0625	93.7	-3.21875	93.6	759.441	93.6	17.8445	93.6	2239.51	93.6	1750.49	93.7	-16.5141	93.7	16.1281
93.8	47.2062	93.8	-3.22345	93.7	759.531	93.7	17.8477	93.7	2239.72	93.7	1750.58	93.8	-16.4031	93.8	16.1258
93.9	47.3484	93.9	-3.23047	93.8	759.624	93.8	17.8524	93.8	2239.97	93.8	1750.68	93.9	-16.3227	93.9	16.1281
94	47.4992	94	-3.23358	93.9	759.704	93.9	17.861	93.9	2240.18	93.9	1750.8	94	-16.2281	94	16.1211
94.1	47.6281	94.1	-3.23828	94	759.784	94	17.8641	94	2240.41	94	1750.88	94.1	-16.1578	94.1	16.1242
94.2	47.7664	94.2	-3.24298	94.1	759.871	94.1	17.8594	94.1	2240.64	94.1	1750.96	94.2	-16.0531	94.2	16.1336
94.3	47.9211	94.3	-3.25	94.2	759.93	94.2	17.8719	94.2	2240.87	94.2	1751.05	94.3	-15.9586	94.3	16.1359
94.4	48.0664	94.4	-3.26642	94.3	759.995	94.3	17.8688	94.3	2241.1	94.3	1751.19	94.4	-15.8797	94.4	16.1375
94.5	48.2054	94.5	-3.27655	94.4	760.078	94.4	17.8711	94.4	2241.31	94.4	1751.32	94.5	-15.8078	94.5	16.1359
94.6	48.3484	94.6	-3.28595	94.5	760.148	94.5	17.8688	94.5	2241.54	94.5	1751.44	94.6	-15.7477	94.6	16.1406
94.7	48.4797	94.7	-3.29297	94.6	760.23	94.6	17.8711	94.6	2241.75	94.6	1751.56	94.7	-15.6727	94.7	16.1453
94.8	48.625	94.8	-3.29608	94.7	760.304	94.7	17.8711	94.7	2241.97	94.7	1751.65	94.8	-15.6117	94.8	16.1476
94.9	48.757	94.9	-3.30078	94.8	760.384	94.8	17.8688	94.8	2242.17	94.8	1751.72	94.9	-15.5289	94.9	16.1437
95	48.8781	95	-3.30548	94.9	760.449	94.9	17.8836	94.9	2242.36	94.9	1751.83	95	-15.4391	95	16.1484
95.1	49.0117	95.1	-3.3125	95	760.515	95	17.8758	95	2242.55	95	1751.94	95.1	-15.3531	95.1	16.1649
95.2	49.1476	95.2	-3.32813	95.1	760.583	95.1	17.8836	95.1	2242.74	95.1	1752.05	95.2	-15.2555	95.2	16.1523
95.3	49.2852	95.3	-3.34296	95.2	760.656	95.2	17.8906	95.2	2242.91	95.2	1752.15	95.3	-15.1813	95.3	16.1555
95.4	49.4172	95.4	-3.34454	95.3	760.738	95.3	17.8883	95.3	2243.09	95.3	1752.28	95.4	-15.0797	95.4	16.1484
95.5	49.5625	95.5	-3.35156	95.4	760.801	95.4	17.9023	95.4	2243.29	95.4	1752.37	95.5	-14.9656	95.5	16.1523
95.6	49.7031	95.6	-3.36407	95.5	760.867	95.5	17.9	95.5	2243.49	95.5	1752.44	95.6	-14.8571	95.6	16.1406
95.7	49.8359	95.7	-3.37421	95.6	760.93	95.6	17.9023	95.6	2243.68	95.6	1752.56	95.7	-14.7445	95.7	16.1453
95.8	49.975	95.8	-3.37891	95.7	760.984	95.7	17.8953	95.7	2243.9	95.7	1752.66	95.8	-14.65	95.8	16.1476
95.9	50.0984	95.9	-3.38361	95.8	761.059	95.8	17.8789	95.8	2244.08	95.8	1752.76	95.9	-14.5406	95.9	16.1359
96	50.2492	96	-3.39374	95.9	761.129	95.9	17.8805	95.9	2244.28	95.9	1752.89	96	-14.4391	96	16.1258
96.1	50.4023	96.1	-3.40314	96	761.222	96	17.868	96	2244.46	96	1753.01	96.1	-14.3453	96.1	16.1211
96.2	50.5156	96.2	-3.41016	96.1	761.313	96.1	17.8664	96.1	2244.66	96.1	1753.1	96.2	-14.2523	96.2	16.1211
96.3	50.6398	96.3	-3.41016	96.2	761.402	96.2	17.8492	96.2	2244.86	96.2	1753.18	96.3	-14.118	96.3	16.1164
96.4	50.7734	96.4	-3.42499	96.3	761.445	96.3	17.8445	96.3	2245.05	96.3	1753.31	96.4	-14.0094	96.4	16.118
96.5	50.9023	96.5	-3.42969	96.4	761.505	96.4	17.8367	96.4	2245.24	96.4	1753.41	96.5	-13.9274	96.5	16.1164
96.6	51.0695	96.6	-3.43439	96.5	761.554	96.5	17.832	96.5	2245.44	96.5	1753.49	96.6	-13.8422	96.6	16.1063
96.7	51.2062	96.7	-3.44452	96.6	761.621	96.6	17.825	96.6	2245.65	96.6	1753.6	96.7	-13.7547	96.7	16.1086
96.8	51.3289	96.8	-3.44922	96.7	761.695	96.7	17.8172	96.7	2245.84	96.7	1753.68	96.8	-13.6742	96.8	16.1094
96.9	51.468	96.9	-3.44922	96.8	761.758	96.8	17.8055	96.8	2245.99	96.8	1753.78	96.9	-13.575	96.9	16.1047
97	51.6086	97	-3.45392	96.9	761.828	96.9	17.7891	96.9	2246.19	96.9	1753.87	97	-13.5063	97	16.1063
97.1	51.7391	97.1	-3.46094	97	761.91	97	17.7906	97	2246.4	97	1753.93	97.1	-13.3883	97.1	16.1094
97.2	51.8898	97.2	-3.46094	97.1	761.961	97.1	17.7813	97.1	2246.6	97.1	1754.02	97.2	-13.2859	97.2	16.1047
97.3	52.0383	97.3	-3.46875	97.2	762.003	97.2	17.7789	97.2	2246.8	97.2	1754.13	97.3	-13.2133	97.3	16.1063
97.4	52.1953	97.4	-3.48047	97.3	762.047	97.3	17.7813	97.3	2246.98	97.3	1754.23	97.4	-13.1383	97.4	16.1047
97.5	52.3242	97.5	-3.48047	97.4	762.145	97.4	17.7781	97.4	2247.18	97.4	1754.32	97.5	-13.0531	97.5	16.1063
97.6	52.475	97.6	-3.48047	97.5	762.223	97.5	17.7742	97.5	2247.38	97.5	1754.39	97.6	-12.9586	97.6	16.1086
97.7	52.618	97.7	-3.48517	97.6	762.281	97.6	17.7664	97.6	2247.59	97.6	1754.49	97.7	-12.861	97.7	16.0969
97.8	52.7461	97.8	-3.49219	97.7	762.347	97.7	17.75	97.7	2247.78	97.7	1754.59	97.8	-12.7594	97.8	16.0945
97.9	52.8703	97.9	-3.4953	97.8	762.41	97.8	17.7516	97.8	2247.97	97.8	1754.67	97.9	-12.6531	97.9	16.0851
98	52.9992	98	-3.5047	97.9	762.48	97.9	17.75	97.9	2248.18	97.9	1754.75	98	-12.5453	98	16.0867
98.1	53.1445	98.1	-3.51172	98	762.554	98	17.7352	98	2248.38	98	1754.83	98.1	-12.4313	98.1	16.0773
98.2	53.2687	98.2	-3.51483	98.1	762.594	98.1	17.7352	98.1	2248.61	98.1	1754.93	98.2	-12.3414	98.2	16.075
98.3	53.3828	98.3	-3.52423	98.2	762.651	98.2	17.7274	98.2	2248.81	98.2	1755.03	98.3	-12.2281	98.3	16.0773
98.4	53.5234	98.4	-3.53595	98.3	762.699	98.3	17.7188	98.3	2249.02	98.3	1755.12	98.4	-12.1352	98.4	16.075
98.5	53.6476	98.5	-3.54297	98.4	762.782	98.4	17.7086	98.4	2249.24	98.4	1755.2	98.5	-12.0602	98.5	16.0773
98.6	53.7734	98.6	-3.54608	98.5	762.835	98.5	17.7109	98.5	2249.44	98.5	1755.3	98.6	-11.9899	98.6	16.0781
98.7	53.8656	98.7	-3.55078	98.6	762.891	98.6	17.7086	98.6	2249.64	98.6	1755.4	98.7	-11.9078	98.7	16.0703
98.8	54.0039	98.8	-3.55548	98.7	762.949	98.7	17.7109	98.7	2249.82	98.7	1755.5	98.8	-11.825	98.8	16.0703
98.9	54.1688	98.9	-3.5625	98.8	763.023	98.8	17.7156	98.8	2250.01	98.8	1755.56	98.9	-11.7281	98.9	16.0656
99	54.3148	99	-3.56561	98.9	763.102	98.9	17.7109	98.9	2250.24	98.9	1755.65	99	-11.6586	99	16.0672
99.1	54.4414	99.1	-3.57031	99	763.16	99	17.7086	99	2250.45	99	1755.73	99.1	-11.5992	99.1	16.0703
99.2	54.582	99.2	-3.57501	99.1	763.211	99.1	17.6992	99.1	2250.66	99.1	1755.82	99.2	-11.5485	99.2	16.0703
99.3	54.7227	99.3	-3.58203	99.2	763.304	99.2	17.7008	99.2	2250.86	99.2	1755.91	99.3	-11.4469	99.3	16.0773
99.4	54.8898	99.4	-3.58514	99.3	763.384	99.3	17.6961	99.3	2251.07	99.3	1756.02	99.4	-11.3227	99.4	16.0672
99.5	55.0266	99.5	-3.58984	99.4	763.464	99.4	17.6914	99.4	2251.26	99.4	1756.11	99.5	-11.2477	99.5	16.0656
99.6	55.1883	99.6	-3.59454	99.5	763.539	99.5	17.6766	99.5	2251.46	99.5	1756.2	99.6	-11.1453	99.6	16.0703
99.7	55.3226	99.7	-3.60156	99.6	763.609	99.6	17.668	99.6	2251.69	99.6	1756.3	99.7	-11.0094	99.7	16.0672
99.8	55.4578	99.8	-3.60468	99.7	763.675	99.7	17.6531	99.7	2251.92	99.7	1756.39	99.8	-10.8883	99.8	16.0656
99.9	55.5742	99.9	-3.62189	99.8	763.735	99.8	17.65	99.8	2252.06	99.8	1756.5	99.9	-10.7789	99.9	16.0656
100	55.7133	100	-3.62891	99.9	763.816	99.9	17.6523	99.9	2252.23	99.9	1756.61	100	-10.6774	100	16.0586
100.1	55.8563	100.1	-3.63361	100	763.887	100	17.6484	100	2252.42	100	1756.68	100.1	-10.5695	100.1	16.0672
100.2	55.9945	100.2	-3.65546	100.1	763.949	100.1	17.6578	100.1	2252.6	100.1	1756.77	100.2	-10.4922	100.2	16.0656
100.3	56.1375	100.3	-3.66016	100.2	764.023	100.2	17.6649	100.2	2252.8	100.2	1756.88	100.3	-10.393	100.3	16.0586
100.4	56.2883	100.4	-3.66486	100.3	764.078	100.3	17.6727	100.3	2252.99	100.3	1756.99	100.4	-10.2985	100.4	16.075
100.5	56.4141	100.5	-3.67188	100.4	764.145	100.4	17.6797	100.4	2253.17	100.4	1757.1	100.5	-10.193	100.5	16.0773
100.6	56.543	100.6	-3.68671	100.5	764.211	100.5	17.6766	100.5	2253.36	100.5	1757.18	100.6	-10.0719	100.6	16.0672
100.7	56.6742	100.7	-3.69141	100.6	764.277	100.6	17.6727	100.6	2253.56	100.6	1757.25	100.7	-9.97034	100.7	16.0703
100.8	56.7859	100.8	-3.69141	100.7	764.352	100.7	17.6813	100.7	2253.78	100.7	1757.32	100.8	-9.89612	100.8	16.0773
100.9	56.9289	100.9	-3.69611	100.8	764.413	100.8	17.6719	100.8	2253.96	100.8	1757.41	100.9	-9.8219	100.9	16.0781
101	57.0383	101	-3.69141	100.9	764.48	100.9	17.6727	100.9	2254.13	100.9	1757.5	101	-9.72815	101	16.0851
101.1	57.1906	101.1	-3.69452	101	764.524	101	17.6844	101	2254.3	101	1757.59	101.1	-9.63831	101.1	16.0867
101.2	57.3242	101.2	-3.69922	101.1	764.573	101.1	17.6961	101.1	2254.49	101.1	1757.67	101.2	-9.53751	101.2	16.0773
101.3	57.4531	101.3	-3.70392	101.2	764.645	101.2	17.6797	101.2	2254.66	101.2	1757.76	101.3	-9.4422	101.3	16.075
101.4	57.5859	101.4	-3.71094	101.3	764.684	101.3	17.6891	101.3	2254.81	101.3	1757.82	101.4	-9.36563	101.4	16.0773
101.5	57.718	101.5	-3.71405	101.4	764.734	101.4	17.6961	101.4	2255	101.4	1757.9	101.5	-9.27112	101.5	16.0703
101.6	57.8438	101.6	-3.71875	101.5	764.804	101.5	17.6992	101.5	2255.17	101.5	1757.94	101.6	-9.17657	101.6	16.075
101.7	57.9844	101.7	-3.72345	101.6	764.864	101.6	17.7008	101.6	2255.36	101.6	1758.03	101.7	-9.07971	101.7	16.0773
101.8	58.1281	101.8	-3.73047	101.7	764.93	101.7	17.6992	101.7	2255.55	101.7	1758.13	101.8	-9.00159	101.8	16.0703
101.9	58.2656	101.9	-3.73517	101.8	765	101.8	17.6961	101.8	2255.76	101.8	1758.22	101.9	-8.90704	101.9	16.075
102	58.3781	102	-3.7453	101.9	765.066	101.9	17.7039	101.9	2255.94	101.9	1758.28	102	-8.81485	102	16.0773
102.1	58.5352	102.1	-3.76172	102	765.129	102	17.6961	102	2256.13	102	1758.34	102.1	-8.74689	102.1	16.0734
102.2	58.6594	102.2	-3.76172	102.1	765.196	102.1	17.6875	102.1	2256.31	102.1	1758.43	102.2	-8.66641	102.2	16.0633
102.3	58.7961	102.3	-3.76642	102.2	765.277	102.2	17.6891	102.2	2256.52	102.2	1758.52	102.3	-8.5719	102.3	16.0656
102.4	58.9531	102.4	-3.77344	102.3	765.34	102.3	17.6883	102.3	2256.72	102.3	1758.59	102.4	-8.44611	102.4	16.0672
102.5	59.082	102.5	-3.77655	102.4	765.413	102.4	17.6844	102.4	2256.91	102.4	1758.7	102.5	-8.36563	102.5	16.0656
102.6	59.2148	102.6	-3.78125	102.5	765.473	102.5	17.6914	102.5	2257.1	102.5	1758.84	102.6	-8.27893	102.6	16.0586
102.7	59.3539	102.7	-3.79376	102.6	765.527	102.6	17.6891	102.6	2257.28	102.6	1758.96	102.7	-8.20862	102.7	16.0625
102.8	59.5086	102.8	-3.80078	102.7	765.593	102.7	17.6914	102.7	2257.46	102.7	1759.07	102.8	-8.12579	102.8	16.0555
102.9	59.6547	102.9	-3.80389	102.8	765.653	102.8	17.6875	102.8	2257.64	102.8	1759.2	102.9	-8.04532	102.9	16.0508
103	59.7977	103	-3.80859	102.9	765.719	102.9	17.7008	102.9	2257.81	102.9	1759.31	103	-7.93439	103	16.0578
103.1	59.9453	103.1	-3.81329	103	765.784	103	17.6961	103	2258	103	1759.43	103.1	-7.83438	103.1	16.0539
103.2	60.0695	103.2	-3.82031	103.1	765.852	103.1	17.7039	103.1	2258.19	103.1	1759.5	103.2	-7.73987	103.2	16.0586
103.3	60.2062	103.3	-3.82031	103.2	765.93	103.2	17.7109	103.2	2258.39	103.2	1759.56	103.3	-7.67657	103.3	16.0555
103.4	60.3289	103.4	-3.83203	103.3	765.971	103.3	17.7086	103.3	2258.55	103.3	1759.65	103.4	-7.58752	103.4	16.0461
103.5	60.4601	103.5	-3.84454	103.4	766.052	103.4	17.7109	103.4	2258.73	103.4	1759.73	103.5	-7.52579	103.5	16.0477
103.6	60.5742	103.6	-3.85156	103.5	766.132	103.5	17.7086	103.5	2258.92	103.5	1759.8	103.6	-7.43439	103.6	16.0461
103.7	60.6984	103.7	-3.85468	103.6	766.227	103.6	17.7109	103.6	2259.09	103.6	1759.87	103.7	-7.34924	103.7	16.0359
103.8	60.8273	103.8	-3.85938	103.7	766.294	103.7	17.7109	103.7	2259.27	103.7	1759.93	103.8	-7.23987	103.8	16.0383
103.9	60.9531	103.9	-3.87109	103.8	766.359	103.8	17.7086	103.8	2259.46	103.8	1759.99	103.9	-7.11877	103.9	16.0344
104	61.0461	104	-3.87579	103.9	766.445	103.9	17.7109	103.9	2259.64	103.9	1760.07	104	-7.05627	104	16.0313
104.1	61.1719	104.1	-3.88593	104	766.508	104	17.7117	104	2259.82	104	1760.14	104.1	-6.95547	104.1	16.0164
104.2	61.3172	104.2	-3.89844	104.1	766.586	104.1	17.7203	104.1	2260	104.1	1760.19	104.2	-6.88049	104.2	16.0148
104.3	61.468	104.3	-3.90314	104.2	766.672	104.2	17.7188	104.2	2260.16	104.2	1760.27	104.3	-6.78595	104.3	16.0078
104.4	61.6055	104.4	-3.92188	104.3	766.734	104.3	17.7203	104.3	2260.33	104.3	1760.37	104.4	-6.68127	104.4	16.0164
104.5	61.7297	104.5	-3.92188	104.4	766.794	104.4	17.7188	104.4	2260.53	104.4	1760.48	104.5	-6.57971	104.5	16.007
104.6	61.8633	104.6	-3.92188	104.5	766.855	104.5	17.7203	104.5	2260.72	104.5	1760.55	104.6	-6.45547	104.6	16.0047
104.7	61.9828	104.7	-3.92499	104.6	766.915	104.6	17.7227	104.6	2260.92	104.6	1760.65	104.7	-6.35626	104.7	16.0117
104.8	62.1133	104.8	-3.93439	104.7	767	104.7	17.7188	104.7	2261.12	104.7	1760.74	104.8	-6.28751	104.8	16.007
104.9	62.2586	104.9	-3.94141	104.8	767.073	104.8	17.7203	104.8	2261.32	104.8	1760.82	104.9	-6.19611	104.9	16.007
105	62.3851	105	-3.94922	104.9	767.134	104.9	17.7305	104.9	2261.47	104.9	1760.9	105	-6.09143	105	16
105.1	62.5352	105.1	-3.94452	105	767.195	105	17.7281	105	2261.65	105	1760.96	105.1	-5.97034	105.1	15.9969
105.2	62.6523	105.2	-3.94922	105.1	767.241	105.1	17.7305	105.1	2261.82	105.1	1761.04	105.2	-5.90002	105.2	15.9953
105.3	62.7883	105.3	-3.94922	105.2	767.294	105.2	17.7399	105.2	2262.02	105.2	1761.14	105.3	-5.81018	105.3	15.9852
105.4	62.9141	105.4	-3.95392	105.3	767.363	105.3	17.7422	105.3	2262.19	105.3	1761.25	105.4	-5.73206	105.4	15.9875
105.5	63.0383	105.5	-3.96875	105.4	767.415	105.4	17.7383	105.4	2262.39	105.4	1761.33	105.5	-5.65002	105.5	15.9852
105.6	63.1641	105.6	-3.96875	105.5	767.495	105.5	17.7399	105.5	2262.55	105.5	1761.38	105.6	-5.57501	105.6	15.9875
105.7	63.2852	105.7	-3.96875	105.6	767.563	105.6	17.7274	105.6	2262.73	105.6	1761.46	105.7	-5.47501	105.7	15.9758
105.8	63.4219	105.8	-3.96875	105.7	767.636	105.7	17.7188	105.7	2262.9	105.7	1761.55	105.8	-5.38361	105.8	15.9656
105.9	63.5695	105.9	-3.96564	105.8	767.673	105.8	17.7203	105.8	2263.08	105.8	1761.62	105.9	-5.29065	105.9	15.9609
106	63.6836	106	-3.97577	105.9	767.726	105.9	17.7109	105.9	2263.25	105.9	1761.68	106	-5.17813	106	15.9609
106.1	63.8117	106.1	-3.98047	106	767.797	106	17.7086	106	2263.43	106	1761.74	106.1	-5.0719	106.1	15.9562
106.2	63.9289	106.2	-3.98047	106.1	767.874	106.1	17.7109	106.1	2263.62	106.1	1761.82	106.2	-4.97266	106.2	15.9531
106.3	64.043	106.3	-3.98517	106.2	767.942	106.2	17.6992	106.2	2263.84	106.2	1761.94	106.3	-4.84143	106.3	15.9445
106.4	64.1719	106.4	-3.99219	106.3	768.003	106.3	17.7086	106.3	2264.03	106.3	1762.03	106.4	-4.74454	106.4	15.9461
106.5	64.2883	106.5	-3.9953	106.4	768.059	106.4	17.6992	106.4	2264.22	106.4	1762.11	106.5	-4.62579	106.5	15.9492
106.6	64.4367	106.6	-4	106.5	768.134	106.5	17.7086	106.5	2264.41	106.5	1762.22	106.6	-4.5094	106.6	15.9562
106.7	64.5789	106.7	-4	106.6	768.206	106.6	17.7109	106.6	2264.6	106.6	1762.33	106.7	-4.41174	106.7	15.957
106.8	64.7062	106.8	-4	106.7	768.255	106.7	17.7039	106.7	2264.77	106.7	1762.39	106.8	-4.3219	106.8	15.9656
106.9	64.8398	106.9	-4.0047	106.8	768.304	106.8	17.7086	106.8	2264.96	106.8	1762.48	106.9	-4.22424	106.9	15.968
107	64.9875	107	-4.01172	106.9	768.359	106.9	17.7156	106.9	2265.15	106.9	1762.55	107	-4.13831	107	15.9656
107.1	65.1063	107.1	-4.01172	107	768.425	107	17.7188	107	2265.35	107	1762.65	107.1	-4.07971	107.1	15.9562
107.2	65.2375	107.2	-4.01172	107.1	768.512	107.1	17.7203	107.1	2265.53	107.1	1762.72	107.2	-4.0094	107.2	15.9688
107.3	65.3516	107.3	-4.01483	107.2	768.578	107.2	17.7227	107.2	2265.71	107.2	1762.8	107.3	-3.93909	107.3	15.9656
107.4	65.507	107.4	-4.01953	107.3	768.641	107.3	17.7109	107.3	2265.87	107.3	1762.88	107.4	-3.87268	107.4	15.968
107.5	65.6406	107.5	-4.02423	107.4	768.695	107.4	17.7086	107.4	2266.02	107.4	1762.99	107.5	-3.77112	107.5	15.9688
107.6	65.793	107.6	-4.03125	107.5	768.753	107.5	17.6992	107.5	2266.18	107.5	1763.06	107.6	-3.6969	107.6	15.9758
107.7	65.9172	107.7	-4.03125	107.6	768.802	107.6	17.7008	107.6	2266.36	107.6	1763.12	107.7	-3.61407	107.7	15.9656
107.8	66.0508	107.8	-4.03436	107.7	768.867	107.7	17.6992	107.7	2266.55	107.7	1763.18	107.8	-3.5094	107.8	15.9641
107.9	66.2031	107.9	-4.03906	107.8	768.93	107.8	17.6891	107.8	2266.73	107.8	1763.24	107.9	-3.39688	107.9	15.9688
108	66.3586	108	-4.04376	107.9	768.976	107.9	17.6914	107.9	2266.9	107.9	1763.31	108	-3.29456	108	15.9656
108.1	66.4727	108.1	-4.05078	108	769.044	108	17.6875	108	2267.04	108	1763.39	108.1	-3.16876	108.1	15.968
108.2	66.6211	108.2	-4.05078	108.1	769.093	108.1	17.6844	108.1	2267.21	108.1	1763.46	108.2	-3.03595	108.2	15.9578
108.3	66.7539	108.3	-4.05548	108.2	769.129	108.2	17.6813	108.2	2267.36	108.2	1763.53	108.3	-2.93127	108.3	15.9562
108.4	66.8781	108.4	-4.06561	108.3	769.175	108.3	17.6797	108.3	2267.53	108.3	1763.59	108.4	-2.83438	108.4	15.9578
108.5	66.9961	108.5	-4.07031	108.4	769.235	108.4	17.6813	108.4	2267.72	108.4	1763.67	108.5	-2.72424	108.5	15.9562
108.6	67.1281	108.6	-4.07501	108.5	769.289	108.5	17.6797	108.5	2267.92	108.5	1763.71	108.6	-2.63361	108.6	15.9492
108.7	67.257	108.7	-4.08514	108.6	769.335	108.6	17.6727	108.6	2268.07	108.6	1763.79	108.7	-2.56485	108.7	15.9445
108.8	67.3438	108.8	-4.09454	108.7	769.395	108.7	17.6766	108.7	2268.23	108.7	1763.86	108.8	-2.49689	108.8	15.9414
108.9	67.3945	108.9	-4.10156	108.8	769.464	108.8	17.668	108.8	2268.39	108.8	1763.95	108.9	-2.41251	108.9	15.9344
109	67.5039	109	-4.10938	108.9	769.544	108.9	17.6578	108.9	2268.56	108.9	1764.04	109	-2.35236	109	15.9414
109.1	67.7297	109.1	-4.12109	109	769.624	109	17.6602	109	2268.76	109	1764.11	109.1	-2.26721	109.1	15.9367
109.2	67.9336	109.2	-4.12579	109.1	769.695	109.1	17.6578	109.1	2268.95	109.1	1764.18	109.2	-2.19376	109.2	15.9297
109.3	68.1789	109.3	-4.12421	109.2	769.782	109.2	17.6484	109.2	2269.11	109.2	1764.27	109.3	-2.12735	109.3	15.925
109.4	68.2656	109.4	-4.14063	109.3	769.855	109.3	17.65	109.3	2269.27	109.3	1764.35	109.4	-2.03595	109.4	15.9266
109.5	68.3391	109.5	-4.14063	109.4	769.918	109.4	17.6453	109.4	2269.42	109.4	1764.43	109.5	-1.93127	109.5	15.925
109.6	68.4219	109.6	-4.14532	109.5	769.988	109.5	17.6523	109.5	2269.57	109.5	1764.53	109.6	-1.84454	109.6	15.9149
109.7	68.5383	109.7	-4.15546	109.6	770.063	109.6	17.6422	109.6	2269.72	109.6	1764.64	109.7	-1.74844	109.7	15.9219
109.8	68.6328	109.8	-4.16016	109.7	770.116	109.7	17.6406	109.7	2269.91	109.7	1764.75	109.8	-1.63751	109.8	15.925
109.9	68.7062	109.9	-4.16486	109.8	770.18	109.8	17.6406	109.8	2270.09	109.8	1764.82	109.9	-1.5094	109.9	15.9149
110	68.868	110	-4.17188	109.9	770.214	109.9	17.6258	109.9	2270.27	109.9	1764.89	110	-1.41174	110	15.9172
110.1	69.0938	110.1	-4.17499	110	770.274	110	17.6188	110	2270.44	110	1764.96	110.1	-1.30313	110.1	15.9102
110.2	69.2852	110.2	-4.18439	110.1	770.343	110.1	17.6141	110.1	2270.58	110.1	1765.05	110.2	-1.22736	110.2	15.9149
110.3	69.4289	110.3	-4.19452	110.2	770.395	110.2	17.6289	110.2	2270.74	110.2	1765.13	110.3	-1.13049	110.3	15.9172
110.4	69.6133	110.4	-4.19922	110.3	770.425	110.3	17.6305	110.3	2270.94	110.3	1765.21	110.4	-1.03595	110.4	15.9055
110.5	69.7492	110.5	-4.1922	110.4	770.493	110.4	17.6406	110.4	2271.14	110.4	1765.27	110.5	-0.950806	110.5	15.9149
110.6	69.8711	110.6	-4.21094	110.5	770.554	110.5	17.6289	110.5	2271.34	110.5	1765.34	110.6	-0.868774	110.6	15.9055
110.7	69.9875	110.7	-4.21875	110.6	770.593	110.6	17.6336	110.6	2271.54	110.6	1765.41	110.7	-0.775787	110.7	15.907
110.8	70.1492	110.8	-4.23047	110.7	770.653	110.7	17.6188	110.7	2271.72	110.7	1765.48	110.8	-0.684387	110.8	15.9055
110.9	70.2687	110.9	-4.23517	110.8	770.753	110.8	17.6211	110.8	2271.88	110.8	1765.58	110.9	-0.654694	110.9	15.8953
111	70.4094	111	-4.2453	110.9	770.805	110.9	17.6188	110.9	2272.05	110.9	1765.68	111	-0.586731	111	15.8976
111.1	70.5703	111.1	-4.26251	111	770.874	111	17.6211	111	2272.22	111	1765.77	111.1	-0.489868	111.1	15.8875
111.2	70.6984	111.2	-4.27264	111.1	770.93	111.1	17.611	111.1	2272.42	111.1	1765.84	111.2	-0.403931	111.2	15.8859
111.3	70.8055	111.3	-4.28204	111.2	770.969	111.2	17.6094	111.2	2272.62	111.2	1765.9	111.3	-0.310181	111.3	15.8859
111.4	70.9367	111.4	-4.29218	111.3	771.02	111.3	17.6094	111.3	2272.8	111.3	1765.98	111.4	-0.232056	111.4	15.8758
111.5	70.9805	111.5	-4.29688	111.4	771.073	111.4	17.6141	111.4	2272.9	111.4	1766.05	111.5	-0.137512	111.5	15.8711
111.6	71.0547	111.6	-4.29376	111.5	771.134	111.5	17.611	111.5	2273.06	111.5	1766.16	111.6	-0.0406494	111.6	15.8742
111.7	71.2461	111.7	-4.30078	111.6	771.195	111.6	17.6094	111.6	2273.22	111.6	1766.27	111.7	0.0374756	111.7	15.8641
111.8	71.5383	111.8	-4.30548	111.7	771.274	111.7	17.5992	111.7	2273.38	111.7	1766.35	111.8	0.114838	111.8	15.8711
111.9	71.7687	111.9	-4.32343	111.8	771.32	111.8	17.6016	111.8	2273.52	111.8	1766.41	111.9	0.221863	111.9	15.8711
112	71.8992	112	-4.32813	111.9	771.366	111.9	17.6024	111.9	2273.66	111.9	1766.48	112	0.307007	112	15.875
112.1	71.9601	112.1	-4.32813	112	771.433	112	17.5992	112	2273.82	112	1766.54	112.1	0.374207	112.1	15.8664
112.2	72.0773	112.2	-4.33282	112.1	771.493	112.1	17.6016	112.1	2273.95	112.1	1766.62	112.2	0.432007	112.2	15.8547
112.3	72.1953	112.3	-4.35468	112.2	771.542	112.2	17.6024	112.2	2274.16	112.2	1766.68	112.3	0.493744	112.3	15.8563
112.4	72.2852	112.4	-4.35938	112.3	771.622	112.3	17.5992	112.3	2274.3	112.3	1766.74	112.4	0.565613	112.4	15.8516
112.5	72.3976	112.5	-4.35938	112.4	771.707	112.4	17.6016	112.4	2274.45	112.4	1766.8	112.5	0.646088	112.5	15.8351
112.6	72.5039	112.6	-4.35938	112.5	771.765	112.5	17.5945	112.5	2274.59	112.5	1766.86	112.6	0.701538	112.6	15.8281
112.7	72.6008	112.7	-4.36407	112.6	771.825	112.6	17.5977	112.6	2274.74	112.6	1766.94	112.7	0.779663	112.7	15.8398
112.8	72.7148	112.8	-4.37421	112.7	771.894	112.7	17.5992	112.7	2274.91	112.7	1767	112.8	0.849976	112.8	15.8367
112.9	72.8359	112.9	-4.37891	112.8	771.954	112.8	17.5945	112.8	2275.06	112.8	1767.09	112.9	0.9328	112.9	15.8351
113	72.9406	113	-4.37891	112.9	772.034	112.9	17.5898	112.9	2275.23	112.9	1767.15	113	1.02966	113	15.8398
113.1	73.043	113.1	-4.38361	113	772.093	113	17.5914	113	2275.43	113	1767.25	113.1	1.13437	113.1	15.8367
113.2	73.1789	113.2	-4.39063	113.1	772.153	113.1	17.5945	113.1	2275.58	113.1	1767.32	113.2	1.20624	113.2	15.8398
113.3	73.2852	113.3	-4.39532	113.2	772.202	113.2	17.5898	113.2	2275.73	113.2	1767.39	113.3	1.30234	113.3	15.8469
113.4	73.4289	113.4	-4.40234	113.3	772.255	113.3	17.5914	113.3	2275.88	113.3	1767.46	113.4	1.38593	113.4	15.8398
113.5	73.5578	113.5	-4.40234	113.4	772.304	113.4	17.582	113.4	2276.03	113.4	1767.53	113.5	1.44296	113.5	15.8469
113.6	73.6914	113.6	-4.41718	113.5	772.376	113.5	17.5828	113.5	2276.2	113.5	1767.6	113.6	1.53516	113.6	15.8445
113.7	73.8125	113.7	-4.42188	113.6	772.441	113.6	17.575	113.6	2276.37	113.6	1767.68	113.7	1.62656	113.7	15.8398
113.8	73.9367	113.8	-4.43439	113.7	772.507	113.7	17.575	113.7	2276.54	113.7	1767.73	113.8	1.70233	113.8	15.8516
113.9	74.1016	113.9	-4.44141	113.8	772.551	113.8	17.5703	113.8	2276.69	113.8	1767.8	113.9	1.79138	113.9	15.8594
114	74.2375	114	-4.44452	113.9	772.609	113.9	17.5711	113.9	2276.85	113.9	1767.87	114	1.86951	114	15.8664
114.1	74.3828	114.1	-4.44922	114	772.672	114	17.5797	114	2277.01	114	1767.94	114.1	1.92029	114.1	15.8594
114.2	74.5117	114.2	-4.45392	114.1	772.745	114.1	17.5703	114.1	2277.15	114.1	1767.99	114.2	2.01328	114.2	15.8641
114.3	74.6445	114.3	-4.46094	114.2	772.797	114.2	17.5602	114.2	2277.32	114.2	1768.07	114.3	2.09766	114.3	15.8711
114.4	74.7734	114.4	-4.46094	114.3	772.856	114.3	17.5586	114.3	2277.49	114.3	1768.12	114.4	2.20468	114.4	15.8664
114.5	74.8898	114.5	-4.47266	114.4	772.894	114.4	17.5602	114.4	2277.62	114.4	1768.16	114.5	2.28748	114.5	15.8711
114.6	75.0266	114.6	-4.47266	114.5	772.964	114.5	17.5555	114.5	2277.79	114.5	1768.23	114.6	2.36249	114.6	15.8758
114.7	75.1688	114.7	-4.47266	114.6	773.008	114.6	17.5672	114.6	2277.95	114.6	1768.31	114.7	2.51013	114.7	15.8781
114.8	75.2914	114.8	-4.47577	114.7	773.044	114.7	17.5625	114.7	2278.1	114.7	1768.36	114.8	2.66638	114.8	15.8758
114.9	75.3953	114.9	-4.48517	114.8	773.085	114.8	17.5633	114.8	2278.25	114.8	1768.45	114.9	2.86639	114.9	15.8664
115	75.5117	115	-4.49219	114.9	773.134	114.9	17.5586	114.9	2278.43	114.9	1768.54	115	2.9906	115	15.8711
115.1	75.6672	115.1	-4.49219	115	773.175	115	17.5602	115	2278.6	115	1768.62	115.1	3.03281	115.1	15.8742
115.2	75.8469	115.2	-4.50311	115.1	773.235	115.1	17.5633	115.1	2278.74	115.1	1768.69	115.2	3.10779	115.2	15.8789
115.3	75.9774	115.3	-4.50781	115.2	773.245	115.2	17.5703	115.2	2278.91	115.2	1768.75	115.3	3.16638	115.3	15.8867
115.4	76.1203	115.4	-4.51251	115.3	773.284	115.3	17.5633	115.3	2279.07	115.3	1768.81	115.4	3.21716	115.4	15.8953
115.5	76.2453	115.5	-4.51953	115.4	773.344	115.4	17.568	115.4	2279.23	115.4	1768.88	115.5	3.29218	115.5	15.9023
115.6	76.3633	115.6	-4.53125	115.5	773.425	115.5	17.5867	115.5	2279.43	115.5	1768.95	115.6	3.35779	115.6	15.9219
115.7	76.468	115.7	-4.53595	115.6	773.442	115.6	17.5898	115.6	2279.6	115.6	1769	115.7	3.40546	115.7	15.925
115.8	76.5984	115.8	-4.54297	115.7	773.503	115.7	17.5945	115.7	2279.74	115.7	1769.07	115.8	3.51794	115.8	15.9266
115.9	76.7297	115.9	-4.54608	115.8	773.563	115.8	17.6024	115.8	2279.91	115.8	1769.13	115.9	3.60312	115.9	15.9297
116	76.8398	116	-4.55078	115.9	773.624	115.9	17.5992	115.9	2280.06	115.9	1769.17	116	3.6781	116	15.9445
116.1	76.9484	116.1	-4.53906	116	773.684	116	17.6141	116	2280.23	116	1769.24	116.1	3.76093	116.1	15.9461
116.2	77.0672	116.2	-4.55078	116.1	773.745	116.1	17.6211	116.1	2280.4	116.1	1769.28	116.2	3.84686	116.2	15.9562
116.3	77.1906	116.3	-4.55078	116.2	773.792	116.2	17.6336	116.2	2280.58	116.2	1769.3	116.3	3.94296	116.3	15.9609
116.4	77.3078	116.4	-4.55548	116.3	773.864	116.3	17.6305	116.3	2280.78	116.3	1769.37	116.4	4.05701	116.4	15.9609
116.5	77.4414	116.5	-4.5625	116.4	773.913	116.4	17.6406	116.4	2280.95	116.4	1769.47	116.5	4.14685	116.5	15.9562
116.6	77.5703	116.6	-4.5625	116.5	773.954	116.5	17.6406	116.5	2281.11	116.5	1769.55	116.6	4.22186	116.6	15.957
116.7	77.7062	116.7	-4.5625	116.6	774.003	116.6	17.6383	116.6	2281.26	116.6	1769.64	116.7	4.31171	116.7	15.9656
116.8	77.8438	116.8	-4.56561	116.7	774.066	116.7	17.6453	116.7	2281.41	116.7	1769.73	116.8	4.39685	116.8	15.9609
116.9	77.9727	116.9	-4.57031	116.8	774.121	116.8	17.6602	116.8	2281.6	116.8	1769.81	116.9	4.4906	116.9	15.9758
117	78.1164	117	-4.57031	116.9	774.183	116.9	17.6578	116.9	2281.78	116.9	1769.93	117	4.58359	117	15.9609
117.1	78.2391	117.1	-4.57031	117	774.231	117	17.6602	117	2281.98	117	1770.02	117.1	4.67108	117.1	15.9578
117.2	78.3703	117.2	-4.57501	117.1	774.265	117.1	17.65	117.1	2282.11	117.1	1770.06	117.2	4.77185	117.2	15.9562
117.3	78.4961	117.3	-4.58984	117.2	774.305	117.2	17.6523	117.2	2282.26	117.2	1770.09	117.3	4.8656	117.3	15.9609
117.4	78.6086	117.4	-4.58203	117.3	774.355	117.3	17.6602	117.3	2282.41	117.3	1770.12	117.4	4.94452	117.4	15.9641
117.5	78.7422	117.5	-4.59296	117.4	774.426	117.4	17.6578	117.4	2282.54	117.4	1770.17	117.5	5.03748	117.5	15.9656
117.6	78.8703	117.6	-4.60236	117.5	774.505	117.5	17.6649	117.5	2282.68	117.5	1770.21	117.6	5.14374	117.6	15.9609
117.7	79.007	117.7	-4.60938	117.6	774.585	117.6	17.668	117.6	2282.82	117.6	1770.28	117.7	5.25156	117.7	15.9531
117.8	79.1688	117.8	-4.62109	117.7	774.653	117.7	17.6696	117.7	2282.95	117.7	1770.34	117.8	5.37732	117.8	15.9445
117.9	79.3125	117.9	-4.62421	117.8	774.726	117.8	17.6844	117.8	2283.1	117.8	1770.39	117.9	5.47498	117.9	15.9297
118	79.4922	118	-4.62891	117.9	774.784	117.9	17.6914	117.9	2283.22	117.9	1770.46	118	5.56171	118	15.9297
118.1	79.6508	118.1	-4.63361	118	774.836	118	17.6891	118	2283.36	118	1770.51	118.1	5.64685	118.1	15.9383
118.2	79.8172	118.2	-4.64063	118.1	774.891	118.1	17.6992	118.1	2283.48	118.1	1770.61	118.2	5.72577	118.2	15.9367
118.3	79.9875	118.3	-4.64063	118.2	774.969	118.2	17.7008	118.2	2283.61	118.2	1770.67	118.3	5.82654	118.3	15.925
118.4	80.1406	118.4	-4.64063	118.3	775.054	118.3	17.7109	118.3	2283.74	118.3	1770.75	118.4	5.91638	118.4	15.9149
118.5	80.3203	118.5	-4.63361	118.4	775.122	118.4	17.7188	118.4	2283.86	118.4	1770.81	118.5	6.00311	118.5	15.9102
118.6	80.468	118.6	-4.64374	118.5	775.175	118.5	17.7203	118.5	2284	118.5	1770.86	118.6	6.09216	118.6	15.9141
118.7	80.5898	118.7	-4.64844	118.6	775.235	118.6	17.7234	118.6	2284.16	118.6	1770.93	118.7	6.16171	118.7	15.9055
118.8	80.7227	118.8	-4.65314	118.7	775.281	118.7	17.7274	118.7	2284.29	118.7	1770.98	118.8	6.24841	118.8	15.8953
118.9	80.832	118.9	-4.66016	118.8	775.34	118.8	17.7234	118.8	2284.44	118.8	1771.05	118.9	6.31171	118.9	15.8859
119	80.9601	119	-4.66327	118.9	775.394	118.9	17.7383	118.9	2284.59	118.9	1771.14	119	6.38513	119	15.8859
119.1	81.0625	119.1	-4.67969	119	775.452	119	17.7516	119	2284.72	119	1771.2	119.1	6.48358	119.1	15.8758
119.2	81.1641	119.2	-4.68439	119.1	775.512	119.1	17.7469	119.1	2284.87	119.1	1771.27	119.2	6.57578	119.2	15.8828
119.3	81.2656	119.3	-4.69141	119.2	775.602	119.2	17.75	119.2	2285.01	119.2	1771.34	119.3	6.65857	119.3	15.8664
119.4	81.3617	119.4	-4.69452	119.3	775.663	119.3	17.7352	119.3	2285.17	119.3	1771.43	119.4	6.74139	119.4	15.8516
119.5	81.4688	119.5	-4.69922	119.4	775.735	119.4	17.7305	119.4	2285.33	119.4	1771.48	119.5	6.83826	119.5	15.8398
119.6	81.5867	119.6	-4.6875	119.5	775.804	119.5	17.7281	119.5	2285.51	119.5	1771.56	119.6	6.9281	119.6	15.8398
119.7	81.7031	119.7	-4.6922	119.6	775.859	119.6	17.7274	119.6	2285.66	119.6	1771.66	119.7	7.02264	119.7	15.8398
119.8	81.8391	119.8	-4.69922	119.7	775.906	119.7	17.7227	119.7	2285.78	119.7	1771.72	119.8	7.11484	119.8	15.8351
119.9	81.9484	119.9	-4.69141	119.8	775.949	119.8	17.7234	119.8	2285.95	119.8	1771.8	119.9	7.20624	119.9	15.8367
120	82.0672	120	-4.69611	119.9	775.996	119.9	17.7156	119.9	2286.12	119.9	1771.88	120	7.27966	120	15.8273
120.1	82.1906	120.1	-4.70313	120	776.07	120	17.6992	120	2286.26	120	1771.93	120.1	7.37265	120.1	15.825
120.2	82.2883	120.2	-4.69843	120.1	776.109	120.1	17.7008	120.1	2286.39	120.1	1772	120.2	7.44763	120.2	15.8203
120.3	82.4336	120.3	-4.69141	120.2	776.168	120.2	17.6992	120.2	2286.54	120.2	1772.07	120.3	7.52734	120.3	15.8273
120.4	82.5461	120.4	-4.69611	120.3	776.211	120.3	17.6961	120.3	2286.73	120.3	1772.11	120.4	7.62265	120.4	15.8172
120.5	82.6836	120.5	-4.70313	120.4	776.238	120.4	17.6813	120.4	2286.91	120.4	1772.17	120.5	7.70233	120.5	15.8078
120.6	82.7852	120.6	-4.70313	120.5	776.301	120.5	17.6719	120.5	2287.08	120.5	1772.24	120.6	7.76013	120.6	15.793
120.7	82.9023	120.7	-4.69141	120.6	776.323	120.6	17.657	120.6	2287.24	120.6	1772.33	120.7	7.84998	120.7	15.7844
120.8	83.0109	120.8	-4.70624	120.7	776.387	120.7	17.6484	120.7	2287.41	120.7	1772.39	120.8	7.9328	120.8	15.7773
120.9	83.1164	120.9	-4.69922	120.8	776.449	120.8	17.65	120.8	2287.54	120.8	1772.47	120.9	8.01328	120.9	15.7859
121	83.2258	121	-4.69922	120.9	776.493	120.9	17.6375	120.9	2287.71	120.9	1772.54	121	8.08124	121	15.7766
121.1	83.3438	121.1	-4.69922	121	776.566	121	17.6406	121	2287.91	121	1772.62	121.1	8.15857	121.1	15.7664
121.2	83.4609	121.2	-4.69141	121.1	776.609	121.1	17.6305	121.1	2287.98	121.1	1772.7	121.2	8.23358	121.2	15.7695
121.3	83.6063	121.3	-4.69611	121.2	776.656	121.2	17.6211	121.2	2288.16	121.2	1772.75	121.3	8.32187	121.3	15.7648
121.4	83.7492	121.4	-4.70624	121.3	776.704	121.3	17.618	121.3	2288.31	121.3	1772.84	121.4	8.40076	121.4	15.7695
121.5	83.8898	121.5	-4.71094	121.4	776.753	121.4	17.6141	121.4	2288.45	121.4	1772.93	121.5	8.47186	121.5	15.7734
121.6	83.9922	121.6	-4.71094	121.5	776.809	121.5	17.6063	121.5	2288.6	121.5	1773	121.6	8.54919	121.6	15.7695
121.7	84.1359	121.7	-4.71094	121.6	776.856	121.6	17.6016	121.6	2288.73	121.6	1773.06	121.7	8.61249	121.7	15.7648
121.8	84.25	121.8	-4.71564	121.7	776.909	121.7	17.5945	121.7	2288.88	121.7	1773.13	121.8	8.67029	121.8	15.7664
121.9	84.4023	121.9	-4.72266	121.8	776.949	121.8	17.5898	121.8	2289.05	121.8	1773.21	121.9	8.74374	121.9	15.757
122	84.5313	122	-4.72266	121.9	776.993	121.9	17.5797	121.9	2289.23	121.9	1773.25	122	8.82654	122	15.7547
122.1	84.675	122.1	-4.72266	122	777.073	122	17.5781	122	2289.35	122	1773.31	122.1	8.89374	122.1	15.7453
122.2	84.8367	122.2	-4.72577	122.1	777.129	122.1	17.5711	122.1	2289.5	122.1	1773.39	122.2	8.9906	122.2	15.75
122.3	84.9727	122.3	-4.73047	122.2	777.16	122.2	17.568	122.2	2289.64	122.2	1773.43	122.3	9.07343	122.3	15.7547
122.4	85.1133	122.4	-4.73047	122.3	777.204	122.3	17.5703	122.3	2289.79	122.3	1773.5	122.4	9.16638	122.4	15.7453
122.5	85.2406	122.5	-4.73517	122.4	777.257	122.4	17.5602	122.4	2289.95	122.4	1773.58	122.5	9.25546	122.5	15.7469
122.6	85.3906	122.6	-4.74219	122.5	777.301	122.5	17.5508	122.5	2290.08	122.5	1773.67	122.6	9.33514	122.6	15.7375
122.7	85.5195	122.7	-4.74219	122.6	777.343	122.6	17.5485	122.6	2290.23	122.6	1773.74	122.7	9.40857	122.7	15.7336
122.8	85.6492	122.8	-4.74219	122.7	777.395	122.7	17.5508	122.7	2290.37	122.7	1773.82	122.8	9.51794	122.8	15.7234
122.9	85.7836	122.9	-4.74219	122.8	777.433	122.8	17.5391	122.8	2290.51	122.8	1773.89	122.9	9.61249	122.9	15.7141
123	85.9149	123	-4.7453	122.9	777.477	122.9	17.5406	122.9	2290.65	122.9	1773.95	123	9.7164	123	15.7039
123.1	86.043	123.1	-4.7547	123	777.52	123	17.5438	123	2290.78	123	1774.02	123.1	9.79919	123.1	15.7109
123.2	86.1719	123.2	-4.76172	123.1	777.566	123.1	17.5359	123.1	2290.93	123.1	1774.1	123.2	9.89685	123.2	15.7062
123.3	86.2914	123.3	-4.76172	123.2	777.609	123.2	17.5242	123.2	2291.08	123.2	1774.14	123.3	9.98358	123.3	15.6992
123.4	86.4266	123.4	-4.76642	123.3	777.668	123.3	17.5195	123.3	2291.26	123.3	1774.23	123.4	10.0609	123.4	15.6992
123.5	86.5625	123.5	-4.77344	123.4	777.722	123.4	17.5211	123.4	2291.39	123.4	1774.29	123.5	10.1344	123.5	15.6961
123.6	86.6867	123.6	-4.77655	123.5	777.762	123.5	17.5164	123.5	2291.51	123.5	1774.36	123.6	10.2266	123.6	15.6984
123.7	86.8008	123.7	-4.78125	123.6	777.804	123.6	17.5117	123.6	2291.63	123.6	1774.41	123.7	10.3336	123.7	15.6797
123.8	86.9414	123.8	-4.78125	123.7	777.864	123.7	17.5	123.7	2291.75	123.7	1774.48	123.8	10.4359	123.8	15.6836
123.9	87.0625	123.9	-4.78595	123.8	777.925	123.8	17.4899	123.8	2291.89	123.8	1774.56	123.9	10.5226	123.9	15.6797
124	87.218	124	-4.78125	123.9	777.977	123.9	17.4852	123.9	2292.02	123.9	1774.63	124	10.6	124	15.675
124.1	87.332	124.1	-4.78125	124	778.024	124	17.4805	124	2292.15	124	1774.7	124.1	10.6711	124.1	15.668
124.2	87.4609	124.2	-4.78436	124.1	778.059	124.1	17.4734	124.1	2292.29	124.1	1774.75	124.2	10.7484	124.2	15.6797
124.3	87.5969	124.3	-4.80078	124.2	778.105	124.2	17.4781	124.2	2292.43	124.2	1774.83	124.3	10.8383	124.3	15.6844
124.4	87.718	124.4	-4.80078	124.3	778.132	124.3	17.4805	124.3	2292.55	124.3	1774.88	124.4	10.9133	124.4	15.6797
124.5	87.8484	124.5	-4.80078	124.4	778.173	124.4	17.4656	124.4	2292.65	124.4	1774.93	124.5	11.014	124.5	15.6867
124.6	87.9648	124.6	-4.80548	124.5	778.219	124.5	17.4539	124.5	2292.79	124.5	1774.97	124.6	11.1351	124.6	15.6766
124.7	88.0891	124.7	-4.8125	124.6	778.253	124.6	17.4609	124.6	2292.91	124.6	1775.03	124.7	11.2492	124.7	15.6719
124.8	88.2031	124.8	-4.8125	124.7	778.294	124.7	17.4586	124.7	2293.05	124.7	1775.05	124.8	11.3547	124.8	15.6672
124.9	88.3781	124.9	-4.80078	124.8	778.323	124.8	17.4492	124.8	2293.2	124.8	1775.09	124.9	11.4547	124.9	15.6602
125	88.543	125	-4.80389	124.9	778.364	124.9	17.4508	124.9	2293.32	124.9	1775.11	125	11.5664	125	15.657
125.1	88.6672	125.1	-4.80859	125	778.398	125	17.4539	125	2293.41	125	1775.15	125.1	11.6781	125.1	15.6555
125.2	88.8125	125.2	-4.80859	125.1	778.438	125.1	17.4461	125.1	2293.51	125.1	1775.16	125.2	11.7875	125.2	15.6437
125.3	88.9727	125.3	-4.80859	125.2	778.461	125.2	17.4414	125.2	2293.62	125.2	1775.2	125.3	11.9016	125.3	15.6367
125.4	89.1086	125.4	-4.82501	125.3	778.5	125.3	17.4391	125.3	2293.73	125.3	1775.23	125.4	11.8969	125.4	15.6336
125.5	89.2469	125.5	-4.83203	125.4	778.534	125.4	17.4414	125.4	2293.81	125.4	1775.25	125.5	11.9711	125.5	15.6359
125.6	89.3664	125.6	-4.83514	125.5	778.554	125.5	17.4297	125.5	2293.93	125.5	1775.27	125.6	11.9906	125.6	15.6289
125.7	89.507	125.7	-4.84454	125.6	778.602	125.6	17.4391	125.6	2294.03	125.6	1775.28	125.7	12.0133	125.7	15.6258
125.8	89.6602	125.8	-4.85156	125.7	778.644	125.7	17.4344	125.7	2294.15	125.7	1775.29	125.8	12.0812	125.8	15.6289
125.9	89.7664	125.9	-4.84454	125.8	778.673	125.8	17.4414	125.8	2294.25	125.8	1775.29	125.9	12.2062	125.9	15.6406
126	89.8976	126	-4.86639	125.9	778.699	125.9	17.4313	125.9	2294.36	125.9	1775.31	126	12.2992	126	15.6406
126.1	90.0313	126.1	-4.85938	126	778.726	126	17.4297	126	2294.48	126	1775.33	126.1	12.3922	126.1	15.6476
126.2	90.1476	126.2	-4.86407	126.1	778.758	126.1	17.4227	126.1	2294.62	126.1	1775.31	126.2	12.5273	126.2	15.6375
126.3	90.2766	126.3	-4.87109	126.2	778.774	126.2	17.4313	126.2	2294.74	126.2	1775.32	126.3	12.639	126.3	15.6406
126.4	90.4023	126.4	-4.87421	126.3	778.809	126.3	17.4297	126.3	2294.82	126.3	1775.31	126.4	12.7125	126.4	15.6476
126.5	90.5508	126.5	-4.87109	126.4	778.855	126.4	17.4227	126.4	2294.91	126.4	1775.31	126.5	12.8047	126.5	15.6484
126.6	90.6914	126.6	-4.87579	126.5	778.879	126.5	17.4313	126.5	2295.01	126.5	1775.3	126.6	12.9086	126.6	15.6453
126.7	90.8273	126.7	-4.88281	126.6	778.903	126.6	17.4219	126.6	2295.1	126.6	1775.3	126.7	13.014	126.7	15.6523
126.8	90.9578	126.8	-4.88593	126.7	778.93	126.7	17.4102	126.7	2295.2	126.7	1775.3	126.8	13.132	126.8	15.6476
126.9	91.0891	126.9	-4.89063	126.8	778.945	126.8	17.4109	126.8	2295.29	126.8	1775.3	126.9	13.2125	126.9	15.6484
127	91.2227	127	-4.89063	126.9	778.964	126.9	17.4196	126.9	2295.37	126.9	1775.3	127	13.2922	127	15.6437
127.1	91.332	127.1	-4.89532	127	778.985	127	17.4102	127	2295.44	127	1775.29	127.1	13.3547	127.1	15.6453
127.2	91.4633	127.2	-4.89063	127.1	778.995	127.1	17.4078	127.1	2295.52	127.1	1775.29	127.2	13.4039	127.2	15.6523
127.3	91.5984	127.3	-4.89063	127.2	779.008	127.2	17.4102	127.2	2295.62	127.2	1775.3	127.3	13.4789	127.3	15.6555
127.4	91.718	127.4	-4.87891	127.3	779.027	127.3	17.4	127.3	2295.74	127.3	1775.29	127.4	13.5422	127.4	15.6602
127.5	91.8398	127.5	-4.88361	127.4	779.066	127.4	17.4023	127.4	2295.82	127.4	1775.3	127.5	13.6242	127.5	15.6649
127.6	91.968	127.6	-4.88281	127.5	779.086	127.5	17.4031	127.5	2295.91	127.5	1775.3	127.6	13.7125	127.6	15.6719
127.7	92.082	127.7	-4.88593	127.6	779.105	127.6	17.4102	127.6	2296	127.6	1775.3	127.7	13.7875	127.7	15.6719
127.8	92.1984	127.8	-4.89063	127.7	779.117	127.7	17.4078	127.7	2296.08	127.7	1775.3	127.8	13.8742	127.8	15.6797
127.9	92.3367	127.9	-4.89532	127.8	779.137	127.8	17.3984	127.8	2296.19	127.8	1775.3	127.9	13.9211	127.9	15.6867
128	92.4484	128	-4.90546	127.9	779.134	127.9	17.4	127.9	2296.28	127.9	1775.28	128	14.0133	128	15.6797
128.1	92.5773	128.1	-4.91016	128	779.148	128	17.3984	128	2296.38	128	1775.27	128.1	14.1008	128.1	15.6875
128.2	92.7227	128.2	-4.90314	128.1	779.16	128.1	17.3914	128.1	2296.47	128.1	1775.27	128.2	14.2172	128.2	15.6992
128.3	92.868	128.3	-4.90234	128.2	779.18	128.2	17.4	128.2	2296.56	128.2	1775.26	128.3	14.3195	128.3	15.7078
128.4	92.975	128.4	-4.90234	128.3	779.199	128.3	17.3906	128.3	2296.62	128.3	1775.26	128.4	14.4164	128.4	15.7062
128.5	93.0984	128.5	-4.90234	128.4	779.219	128.4	17.3836	128.4	2296.69	128.4	1775.24	128.5	14.5258	128.5	15.7109
128.6	93.218	128.6	-4.90546	128.5	779.23	128.5	17.3922	128.5	2296.79	128.5	1775.23	128.6	14.6203	128.6	15.7156
128.7	93.3516	128.7	-4.90314	128.6	779.234	128.6	17.3875	128.6	2296.87	128.6	1775.21	128.7	14.7054	128.7	15.718
128.8	93.4875	128.8	-4.91016	128.7	779.246	128.7	17.3906	128.7	2296.98	128.7	1775.2	128.8	14.7844	128.8	15.7141
128.9	93.6211	128.9	-4.91016	128.8	779.262	128.8	17.3789	128.8	2297.1	128.8	1775.18	128.9	14.8336	128.9	15.7156
129	93.7258	129	-4.91327	128.9	779.265	128.9	17.3805	128.9	2297.17	128.9	1775.16	129	14.9211	129	15.7062
129.1	93.8563	129.1	-4.92267	129	779.282	129	17.3836	129	2297.24	129	1775.13	129.1	15.0031	129.1	15.7156
129.2	93.9828	129.2	-4.92969	129.1	779.296	129.1	17.3789	129.1	2297.32	129.1	1775.1	129.2	15.0953	129.2	15.7109
129.3	94.0984	129.3	-4.93439	129.2	779.289	129.2	17.3805	129.2	2297.39	129.2	1775.08	129.3	15.1633	129.3	15.718
129.4	94.2101	129.4	-4.94141	129.3	779.297	129.3	17.3789	129.3	2297.48	129.3	1775.05	129.4	15.2359	129.4	15.7188
129.5	94.3359	129.5	-4.94452	129.4	779.309	129.4	17.3719	129.4	2297.58	129.4	1775.04	129.5	15.2922	129.5	15.7227
129.6	94.4484	129.6	-4.95392	129.5	779.309	129.5	17.3805	129.5	2297.66	129.5	1775.02	129.6	15.3547	129.6	15.7188
129.7	94.582	129.7	-4.96405	129.6	779.321	129.6	17.3789	129.6	2297.71	129.6	1774.99	129.7	15.4476	129.7	15.7305
129.8	94.6953	129.8	-4.96875	129.7	779.34	129.7	17.3719	129.7	2297.8	129.7	1774.95	129.8	15.5101	129.8	15.7258
129.9	94.8	129.9	-4.97345	129.8	779.343	129.8	17.3805	129.8	2297.85	129.8	1774.92	129.9	15.6008	129.9	15.7234
130	94.9258	130	-4.98358	129.9	779.355	129.9	17.3711	129.9	2297.89	129.9	1774.88	130	15.7242	130	15.7305
130.1	95.0578	130.1	-4.99298	130	779.352	130	17.3836	130	2297.95	130	1774.84	130.1	15.8359	130.1	15.7375
130.2	95.1602	130.2	-5	130.1	779.363	130.1	17.3789	130.1	2298	130.1	1774.8	130.2	15.9398	130.2	15.7383
130.3	95.3008	130.3	-5.00781	130.2	779.355	130.2	17.3805	130.2	2298.06	130.2	1774.76	130.3	16.0445	130.3	15.7469
130.4	95.4063	130.4	-5.01953	130.3	779.372	130.3	17.3836	130.3	2298.13	130.3	1774.72	130.4	16.1469	130.4	15.7453
130.5	95.4992	130.5	-5.02423	130.4	779.379	130.4	17.3836	130.4	2298.18	130.4	1774.7	130.5	16.2726	130.5	15.7383
130.6	95.6211	130.6	-5.03436	130.5	779.382	130.5	17.3906	130.5	2298.23	130.5	1774.66	130.6	16.4641	130.6	15.7469
130.7	95.7617	130.7	-5.03906	130.6	779.387	130.6	17.3883	130.6	2298.27	130.6	1774.63	130.7	16.4547	130.7	15.757
130.8	95.8976	130.8	-5.03125	130.7	779.391	130.7	17.3953	130.7	2298.33	130.7	1774.58	130.8	16.4867	130.8	15.7469
130.9	96.0281	130.9	-5.03906	130.8	779.398	130.8	17.3953	130.8	2298.38	130.8	1774.53	130.9	16.5226	130.9	15.7453
131	96.1789	131	-5.05078	130.9	779.398	130.9	17.3984	130.9	2298.42	130.9	1774.49	131	16.6	131	15.7336
131.1	96.2961	131.1	-5.05078	131	779.398	131	17.4031	131	2298.49	131	1774.45	131.1	16.6469	131.1	15.7234
131.2	96.4266	131.2	-5.05548	131.1	779.415	131.1	17.4117	131.1	2298.51	131.1	1774.4	131.2	16.6867	131.2	15.7227
131.3	96.5695	131.3	-5.06561	131.2	779.422	131.2	17.4023	131.2	2298.57	131.2	1774.36	131.3	16.732	131.3	15.7109
131.4	96.6867	131.4	-5.07501	131.3	779.422	131.3	17.3984	131.3	2298.62	131.3	1774.31	131.4	16.8234	131.4	15.718
131.5	96.832	131.5	-5.08203	131.4	779.422	131.4	17.3914	131.4	2298.64	131.4	1774.26	131.5	16.8922	131.5	15.7109
131.6	96.9805	131.6	-5.07501	131.5	779.425	131.5	17.3883	131.5	2298.65	131.5	1774.21	131.6	16.9719	131.6	15.7109
131.7	97.1164	131.7	-5.08514	131.6	779.434	131.6	17.3836	131.6	2298.7	131.6	1774.17	131.7	17.0539	131.7	15.7156
131.8	97.2422	131.8	-5.09454	131.7	779.433	131.7	17.3906	131.7	2298.76	131.7	1774.11	131.8	17.1344	131.8	15.718
131.9	97.3664	131.9	-5.10156	131.8	779.434	131.8	17.3883	131.8	2298.8	131.8	1774.06	131.9	17.2219	131.9	15.7141
132	97.4656	132	-5.10468	131.9	779.445	131.9	17.3789	131.9	2298.84	131.9	1774.01	132	17.2875	132	15.7156
132.1	97.5938	132.1	-5.11407	132	779.449	132	17.3805	132	2298.91	132	1773.97	132.1	17.3656	132.1	15.7062
132.2	97.7227	132.2	-5.12109	132.1	779.438	132.1	17.3758	132.1	2298.95	132.1	1773.92	132.2	17.4453	132.2	15.7039
132.3	97.8422	132.3	-5.12891	132.2	779.442	132.2	17.3789	132.2	2299.01	132.2	1773.88	132.3	17.5375	132.3	15.7062
132.4	97.9578	132.4	-5.14063	132.3	779.449	132.3	17.3836	132.3	2299.06	132.3	1773.83	132.4	17.6273	132.4	15.7078
132.5	98.0578	132.5	-5.14844	132.4	779.438	132.4	17.3758	132.4	2299.08	132.4	1773.76	132.5	17.7141	132.5	15.7062
132.6	98.1719	132.6	-5.16016	132.5	779.441	132.5	17.3836	132.5	2299.15	132.5	1773.7	132.6	17.7875	132.6	15.7031
132.7	98.3125	132.7	-5.16486	132.6	779.438	132.6	17.3789	132.6	2299.22	132.6	1773.64	132.7	17.8656	132.7	15.6945
132.8	98.4414	132.8	-5.17499	132.7	779.434	132.7	17.3805	132.7	2299.32	132.7	1773.58	132.8	17.9281	132.8	15.6961
132.9	98.5773	132.9	-5.17969	132.8	779.43	132.8	17.3836	132.8	2299.36	132.8	1773.52	132.9	17.9836	132.9	15.6945
133	98.718	133	-5.18439	132.9	779.43	132.9	17.3789	132.9	2299.41	132.9	1773.46	133	18.0422	133	15.6961
133.1	98.8484	133.1	-5.19141	133	779.418	133	17.3805	133	2299.45	133	1773.38	133.1	18.1227	133.1	15.7062
133.2	98.9531	133.2	-5.19452	133.1	779.418	133.1	17.3953	133.1	2299.49	133.1	1773.32	133.2	18.2141	133.2	15.6914
133.3	99.0938	133.3	-5.19141	133.2	779.413	133.2	17.3906	133.2	2299.53	133.2	1773.27	133.3	18.2828	133.3	15.6992
133.4	99.2297	133.4	-5.19611	133.3	779.418	133.3	17.3883	133.3	2299.61	133.3	1773.22	133.4	18.3398	133.4	15.7062
133.5	99.3516	133.5	-5.19141	133.4	779.406	133.4	17.3906	133.4	2299.65	133.4	1773.17	133.5	18.3844	133.5	15.6961
133.6	99.4797	133.6	-5.19452	133.5	779.398	133.5	17.3805	133.5	2299.7	133.5	1773.1	133.6	18.4641	133.6	15.6992
133.7	99.582	133.7	-5.19922	133.6	779.387	133.6	17.3906	133.6	2299.76	133.6	1773.05	133.7	18.5406	133.7	15.7062
133.8	99.6836	133.8	-5.1922	133.7	779.387	133.7	17.3836	133.7	2299.81	133.7	1773	133.8	18.6008	133.8	15.7156
133.9	99.7617	133.9	-5.20233	133.8	779.38	133.8	17.3789	133.8	2299.85	133.8	1772.94	133.9	18.6859	133.9	15.718
134	99.8812	134	-5.20392	133.9	779.379	133.9	17.3688	133.9	2299.89	133.9	1772.89	134	18.7726	134	15.7156
134.1	99.9922	134.1	-5.21094	134	779.379	134	17.3711	134	2299.93	134	1772.84	134.1	18.8578	134.1	15.7062
134.2	100.102	134.2	-5.21564	134.1	779.367	134.1	17.3719	134.1	2300.01	134.1	1772.8	134.2	18.9445	134.2	15.7109
134.3	100.239	134.3	-5.22577	134.2	779.363	134.2	17.3805	134.2	2300.04	134.2	1772.77	134.3	19.0375	134.3	15.7109
134.4	100.342	134.4	-5.21875	134.3	779.367	134.3	17.3789	134.3	2300.08	134.3	1772.72	134.4	19.1305	134.4	15.7109
134.5	100.489	134.5	-5.22345	134.4	779.355	134.4	17.3836	134.4	2300.15	134.4	1772.67	134.5	19.2297	134.5	15.6945
134.6	100.602	134.6	-5.23047	134.5	779.36	134.5	17.3883	134.5	2300.19	134.5	1772.62	134.6	19.3508	134.6	15.6961
134.7	100.713	134.7	-5.23358	134.6	779.359	134.6	17.3906	134.6	2300.26	134.6	1772.57	134.7	19.4523	134.7	15.7109
134.8	100.82	134.8	-5.23047	134.7	779.348	134.7	17.3953	134.7	2300.3	134.7	1772.54	134.8	19.5328	134.8	15.718
134.9	100.941	134.9	-5.23047	134.8	779.343	134.8	17.3984	134.8	2300.35	134.8	1772.49	134.9	19.6203	134.9	15.7109
135	101.07	135	-5.23517	134.9	779.336	134.9	17.3883	134.9	2300.39	134.9	1772.44	135	19.7172	135	15.7109
135.1	101.172	135.1	-5.2453	135	779.328	135	17.3906	135	2300.46	135	1772.41	135.1	19.8195	135.1	15.7141
135.2	101.269	135.2	-5.24298	135.1	779.321	135.1	17.3883	135.1	2300.52	135.1	1772.37	135.2	19.9047	135.2	15.7039
135.3	101.371	135.3	-5.2547	135.2	779.328	135.2	17.3953	135.2	2300.57	135.2	1772.31	135.3	19.9797	135.3	15.6945
135.4	101.446	135.4	-5.26483	135.3	779.321	135.3	17.3906	135.3	2300.64	135.3	1772.27	135.4	20.057	135.4	15.6961
135.5	101.563	135.5	-5.26172	135.4	779.328	135.4	17.3883	135.4	2300.7	135.4	1772.23	135.5	20.1437	135.5	15.6867
135.6	101.741	135.6	-5.26172	135.5	779.323	135.5	17.3953	135.5	2300.74	135.5	1772.18	135.6	20.2054	135.6	15.6961
135.7	101.907	135.7	-5.2547	135.6	779.328	135.6	17.3906	135.6	2300.83	135.6	1772.14	135.7	20.3	135.7	15.6867
135.8	102.035	135.8	-5.26172	135.7	779.316	135.7	17.3875	135.7	2300.88	135.7	1772.09	135.8	20.3922	135.8	15.6883
135.9	102.182	135.9	-5.27344	135.8	779.309	135.8	17.3789	135.8	2300.96	135.8	1772.04	135.9	20.4867	135.9	15.6867
136	102.317	136	-5.27655	135.9	779.297	135.9	17.3688	135.9	2301.02	135.9	1771.98	136	20.5742	136	15.6914
136.1	102.468	136.1	-5.26953	136	779.302	136	17.3711	136	2301.07	136	1771.93	136.1	20.6664	136.1	15.6914
136.2	102.638	136.2	-5.27423	136.1	779.304	136.1	17.3688	136.1	2301.12	136.1	1771.87	136.2	20.7758	136.2	15.6914
136.3	102.816	136.3	-5.28125	136.2	779.297	136.2	17.3711	136.2	2301.17	136.2	1771.82	136.3	20.8937	136.3	15.6836
136.4	102.98	136.4	-5.26953	136.3	779.302	136.3	17.3641	136.3	2301.2	136.3	1771.77	136.4	21.0133	136.4	15.6672
136.5	103.113	136.5	-5.27264	136.4	779.309	136.4	17.3688	136.4	2301.24	136.4	1771.72	136.5	21.0812	136.5	15.6649
136.6	103.284	136.6	-5.28204	136.5	779.301	136.5	17.3711	136.5	2301.28	136.5	1771.67	136.6	21.093	136.6	15.6672
136.7	103.461	136.7	-5.28125	136.6	779.301	136.6	17.3688	136.6	2301.33	136.6	1771.62	136.7	21.1734	136.7	15.6602
136.8	103.602	136.8	-5.28906	136.7	779.304	136.7	17.3711	136.7	2301.39	136.7	1771.57	136.8	21.2172	136.8	15.657
136.9	103.684	136.9	-5.30078	136.8	779.302	136.8	17.3594	136.8	2301.44	136.8	1771.52	136.9	21.2726	136.9	15.6555
137	103.781	137	-5.31329	136.9	779.312	136.9	17.361	136.9	2301.49	136.9	1771.48	137	21.3117	137	15.6555
137.1	103.914	137.1	-5.32343	137	779.321	137	17.3594	137	2301.53	137	1771.42	137.1	21.357	137.1	15.6484
137.2	104.019	137.2	-5.32813	137.1	779.344	137.1	17.3492	137.1	2301.58	137.1	1771.35	137.2	21.4047	137.2	15.6453
137.3	104.141	137.3	-5.33282	137.2	779.34	137.2	17.3398	137.2	2301.62	137.2	1771.3	137.3	21.4789	137.3	15.6406
137.4	104.254	137.4	-5.34296	137.3	779.355	137.3	17.3445	137.3	2301.66	137.3	1771.26	137.4	21.5664	137.4	15.6476
137.5	104.363	137.5	-5.34454	137.4	779.359	137.4	17.3492	137.4	2301.72	137.4	1771.21	137.5	21.6344	137.5	15.6375
137.6	104.487	137.6	-5.35156	137.5	779.352	137.5	17.3398	137.5	2301.8	137.5	1771.17	137.6	21.6789	137.6	15.6359
137.7	104.613	137.7	-5.35468	137.6	779.363	137.6	17.3281	137.6	2301.87	137.6	1771.12	137.7	21.7648	137.7	15.6289
137.8	104.734	137.8	-5.36407	137.7	779.372	137.7	17.3328	137.7	2301.96	137.7	1771.05	137.8	21.8187	137.8	15.6258
137.9	104.847	137.9	-5.37109	137.8	779.379	137.8	17.3297	137.8	2302	137.8	1771	137.9	21.889	137.9	15.6164
138	104.961	138	-5.37579	137.9	779.382	137.9	17.3398	137.9	2302.06	137.9	1770.95	138	21.975	138	15.6211
138.1	105.074	138.1	-5.38593	138	779.391	138	17.3375	138	2302.14	138	1770.9	138.1	22.0617	138.1	15.6164
138.2	105.195	138.2	-5.39063	138.1	779.403	138.1	17.3445	138.1	2302.19	138.1	1770.85	138.2	22.1516	138.2	15.6063
138.3	105.316	138.3	-5.39532	138.2	779.413	138.2	17.3516	138.2	2302.26	138.2	1770.8	138.3	22.2367	138.3	15.6047
138.4	105.422	138.4	-5.40546	138.3	779.43	138.3	17.3492	138.3	2302.32	138.3	1770.74	138.4	22.3148	138.4	15.5977
138.5	105.551	138.5	-5.41797	138.4	779.438	138.4	17.3398	138.4	2302.4	138.4	1770.69	138.5	22.4133	138.5	15.6063
138.6	105.68	138.6	-5.42267	138.5	779.454	138.5	17.3445	138.5	2302.45	138.5	1770.65	138.6	22.4984	138.6	15.5969
138.7	105.801	138.7	-5.4328	138.6	779.461	138.6	17.3492	138.6	2302.5	138.6	1770.59	138.7	22.5687	138.7	15.5867
138.8	105.929	138.8	-5.4422	138.7	779.461	138.7	17.3516	138.7	2302.55	138.7	1770.54	138.8	22.6547	138.8	15.582
138.9	106.063	138.9	-5.44922	138.8	779.464	138.8	17.3398	138.8	2302.58	138.8	1770.49	138.9	22.7609	138.9	15.5851
139	106.172	139	-5.45392	138.9	779.462	138.9	17.3375	138.9	2302.63	138.9	1770.43	139	22.843	139	15.575
139.1	106.301	139.1	-5.47577	139	779.469	139	17.3563	139	2302.7	139	1770.39	139.1	22.9359	139.1	15.5703
139.2	106.414	139.2	-5.48047	139.1	779.488	139.1	17.3516	139.1	2302.74	139.1	1770.34	139.2	23.0305	139.2	15.5656
139.3	106.563	139.3	-5.49689	139.2	779.508	139.2	17.3492	139.2	2302.8	139.2	1770.29	139.3	23.1305	139.3	15.5539
139.4	106.706	139.4	-5.50391	139.3	779.512	139.3	17.3516	139.3	2302.85	139.3	1770.23	139.4	23.2492	139.4	15.5555
139.5	106.859	139.5	-5.51483	139.4	779.523	139.4	17.3524	139.4	2302.9	139.4	1770.17	139.5	23.3391	139.5	15.5461
139.6	106.989	139.6	-5.51953	139.5	779.527	139.5	17.3492	139.5	2302.95	139.5	1770.11	139.6	23.4328	139.6	15.5359
139.7	107.113	139.7	-5.51953	139.6	779.532	139.6	17.3516	139.6	2302.99	139.6	1770.04	139.7	23.5062	139.7	15.5344
139.8	107.249	139.8	-5.51953	139.7	779.542	139.7	17.3492	139.7	2303.05	139.7	1769.99	139.8	23.6203	139.8	15.5273
139.9	107.371	139.9	-5.53595	139.8	779.547	139.8	17.3563	139.8	2303.12	139.8	1769.94	139.9	23.7008	139.9	15.5313
140	107.487	140	-5.54297	139.9	779.552	139.9	17.3516	139.9	2303.18	139.9	1769.89	140	23.8	140	15.5195
140.1	107.621	140.1	-5.54297	140	779.559	140	17.3477	140	2303.24	140	1769.82	140.1	23.9125	140.1	15.5281
140.2	107.75	140.2	-5.54297	140.1	779.562	140.1	17.3492	140.1	2303.29	140.1	1769.79	140.2	24.0156	140.2	15.5187
140.3	107.878	140.3	-5.54608	140.2	779.566	140.2	17.3641	140.2	2303.35	140.2	1769.76	140.3	24.0992	140.3	15.5148
140.4	107.98	140.4	-5.55548	140.3	779.583	140.3	17.3594	140.3	2303.4	140.3	1769.71	140.4	24.1953	140.4	15.5078
140.5	108.102	140.5	-5.5625	140.4	779.59	140.4	17.361	140.4	2303.46	140.4	1769.66	140.5	24.2758	140.5	15.5047
140.6	108.223	140.6	-5.56561	140.5	779.593	140.5	17.3594	140.5	2303.53	140.5	1769.6	140.6	24.3656	140.6	15.5117
140.7	108.327	140.7	-5.57501	140.6	779.598	140.6	17.3524	140.6	2303.59	140.6	1769.57	140.7	24.4328	140.7	15.5148
140.8	108.441	140.8	-5.58984	140.7	779.602	140.7	17.361	140.7	2303.68	140.7	1769.52	140.8	24.5062	140.8	15.5047
140.9	108.551	140.9	-5.58984	140.8	779.617	140.8	17.3594	140.8	2303.74	140.8	1769.48	140.9	24.5883	140.9	15.5117
141	108.664	141	-5.58984	140.9	779.622	140.9	17.3524	140.9	2303.8	140.9	1769.45	141	24.6711	141	15.5117
141.1	108.793	141.1	-5.60626	141	779.632	141	17.3594	141	2303.88	141	1769.39	141.1	24.7726	141.1	15.507
141.2	108.917	141.2	-5.61639	141.1	779.648	141.1	17.3492	141.1	2303.97	141.1	1769.34	141.2	24.8727	141.2	15.5
141.3	109.059	141.3	-5.62109	141.2	779.653	141.2	17.3477	141.2	2304.03	141.2	1769.3	141.3	24.9484	141.3	15.5078
141.4	109.182	141.4	-5.62579	141.3	779.66	141.3	17.3492	141.3	2304.08	141.3	1769.26	141.4	25.0375	141.4	15.5047
141.5	109.332	141.5	-5.64374	141.4	779.663	141.4	17.3445	141.4	2304.14	141.4	1769.22	141.5	25.1078	141.5	15.507
141.6	109.458	141.6	-5.65314	141.5	779.673	141.5	17.3398	141.5	2304.19	141.5	1769.17	141.6	25.1664	141.6	15.5
141.7	109.573	141.7	-5.67188	141.6	779.688	141.6	17.3445	141.6	2304.25	141.6	1769.14	141.7	25.2445	141.7	15.4953
141.8	109.719	141.8	-5.67188	141.7	779.691	141.7	17.3414	141.7	2304.3	141.7	1769.09	141.8	25.3195	141.8	15.4969
141.9	109.852	141.9	-5.67499	141.8	779.7	141.8	17.3398	141.8	2304.37	141.8	1769.06	141.9	25.4016	141.9	15.4875
142	109.992	142	-5.67969	141.9	779.719	141.9	17.3445	141.9	2304.41	141.9	1769.01	142	25.4867	142	15.4852
142.1	110.152	142.1	-5.67969	142	779.723	142	17.3414	142	2304.5	142	1768.97	142.1	25.5851	142.1	15.4758
142.2	110.245	142.2	-5.6875	142.1	779.738	142.1	17.3398	142.1	2304.53	142.1	1768.93	142.2	25.6508	142.2	15.4688
142.3	110.368	142.3	-5.6875	142.2	779.741	142.2	17.3445	142.2	2304.6	142.2	1768.89	142.3	25.7172	142.3	15.4656
142.4	110.48	142.4	-5.70392	142.3	779.746	142.3	17.3398	142.3	2304.65	142.3	1768.86	142.4	25.7797	142.4	15.468
142.5	110.602	142.5	-5.69922	142.4	779.762	142.4	17.3375	142.4	2304.69	142.4	1768.81	142.5	25.8508	142.5	15.4578
142.6	110.718	142.6	-5.71405	142.5	779.77	142.5	17.3445	142.5	2304.73	142.5	1768.78	142.6	25.9312	142.6	15.4484
142.7	110.832	142.7	-5.72345	142.6	779.781	142.6	17.3398	142.6	2304.79	142.6	1768.73	142.7	26.0273	142.7	15.4492
142.8	110.958	142.8	-5.73047	142.7	779.784	142.7	17.3414	142.7	2304.82	142.7	1768.69	142.8	26.0804	142.8	15.4492
142.9	111.089	142.9	-5.73517	142.8	779.797	142.8	17.3367	142.8	2304.86	142.8	1768.65	142.9	26.139	142.9	15.4562
143	111.191	143	-5.74219	142.9	779.797	142.9	17.3398	142.9	2304.9	142.9	1768.61	143	26.2125	143	15.4461
143.1	111.324	143.1	-5.7453	143	779.802	143	17.3328	143	2304.96	143	1768.58	143.1	26.2758	143.1	15.4414
143.2	111.456	143.2	-5.75	143.1	779.809	143.1	17.3297	143.1	2305.02	143.1	1768.54	143.2	26.3672	143.2	15.4492
143.3	111.602	143.3	-5.7547	143.2	779.812	143.2	17.332	143.2	2305.1	143.2	1768.5	143.3	26.4476	143.3	15.4445
143.4	111.737	143.4	-5.76172	143.3	779.828	143.3	17.3297	143.3	2305.13	143.3	1768.47	143.4	26.5258	143.4	15.4492
143.5	111.864	143.5	-5.76483	143.4	779.836	143.4	17.3203	143.4	2305.16	143.4	1768.43	143.5	26.6125	143.5	15.4461
143.6	111.968	143.6	-5.76953	143.5	779.852	143.5	17.3133	143.5	2305.19	143.5	1768.4	143.6	26.6859	143.6	15.4414
143.7	112.066	143.7	-5.76953	143.6	779.859	143.6	17.3203	143.6	2305.25	143.6	1768.36	143.7	26.7648	143.7	15.4367
143.8	112.172	143.8	-5.76953	143.7	779.879	143.7	17.3133	143.7	2305.29	143.7	1768.33	143.8	26.8265	143.8	15.4375
143.9	112.281	143.9	-5.77423	143.8	779.887	143.8	17.318	143.8	2305.34	143.8	1768.31	143.9	26.9328	143.9	15.4461
144	112.378	144	-5.78125	143.9	779.898	143.9	17.3203	143.9	2305.38	143.9	1768.28	144	27.0211	144	15.4367
144.1	112.48	144.1	-5.78125	144	779.913	144	17.3102	144	2305.4	144	1768.24	144.1	27.0891	144.1	15.4297
144.2	112.582	144.2	-5.78125	144.1	779.926	144.1	17.3008	144.1	2305.44	144.1	1768.2	144.2	27.182	144.2	15.4414
144.3	112.711	144.3	-5.78125	144.2	779.942	144.2	17.3016	144.2	2305.48	144.2	1768.17	144.3	27.2852	144.3	15.4383
144.4	112.82	144.4	-5.78436	144.3	779.957	144.3	17.3102	144.3	2305.52	144.3	1768.15	144.4	27.3922	144.4	15.4367
144.5	112.926	144.5	-5.78906	144.4	779.957	144.4	17.2961	144.4	2305.58	144.4	1768.13	144.5	27.468	144.5	15.4414
144.6	113.019	144.6	-5.78906	144.5	779.969	144.5	17.2985	144.5	2305.63	144.5	1768.11	144.6	27.5695	144.6	15.4414
144.7	113.133	144.7	-5.78204	144.6	779.988	144.6	17.2938	144.6	2305.72	144.6	1768.08	144.7	27.6664	144.7	15.4445
144.8	113.237	144.8	-5.78906	144.7	780	144.7	17.3008	144.7	2305.77	144.7	1768.04	144.8	27.7531	144.8	15.4375
144.9	113.34	144.9	-5.78906	144.8	780.024	144.8	17.2985	144.8	2305.83	144.8	1768.02	144.9	27.8461	144.9	15.4492
145	113.453	145	-5.78595	144.9	780.039	144.9	17.3086	144.9	2305.89	144.9	1767.98	145	27.9437	145	15.4461
145.1	113.57	145.1	-5.79297	145	780.051	145	17.3102	145	2305.96	145	1767.96	145.1	28.0305	145.1	15.4492
145.2	113.66	145.2	-5.79297	145.1	780.059	145.1	17.3086	145.1	2306.05	145.1	1767.94	145.2	28.1078	145.2	15.4562
145.3	113.781	145.3	-5.79297	145.2	780.073	145.2	17.3133	145.2	2306.12	145.2	1767.91	145.3	28.1976	145.3	15.4461
145.4	113.883	145.4	-5.78436	145.3	780.086	145.3	17.3219	145.3	2306.2	145.3	1767.88	145.4	28.2609	145.4	15.4414
145.5	113.999	145.5	-5.78906	145.4	780.109	145.4	17.3203	145.4	2306.25	145.4	1767.87	145.5	28.3187	145.5	15.4414
145.6	114.102	145.6	-5.79376	145.5	780.134	145.5	17.3281	145.5	2306.31	145.5	1767.84	145.6	28.4016	145.6	15.4367
145.7	114.223	145.7	-5.80078	145.6	780.148	145.6	17.3328	145.6	2306.38	145.6	1767.82	145.7	28.4898	145.7	15.4266
145.8	114.324	145.8	-5.79608	145.7	780.171	145.7	17.3297	145.7	2306.44	145.7	1767.79	145.8	28.5742	145.8	15.4172
145.9	114.441	145.9	-5.80859	145.8	780.192	145.8	17.3398	145.8	2306.51	145.8	1767.77	145.9	28.6422	145.9	15.4055
146	114.551	146	-5.80548	145.9	780.219	145.9	17.3297	145.9	2306.57	145.9	1767.76	146	28.7101	146	15.4031
146.1	114.667	146.1	-5.82031	146	780.23	146	17.332	146	2306.62	146	1767.73	146.1	28.7758	146.1	15.4102
146.2	114.793	146.2	-5.82031	146.1	780.25	146.1	17.3328	146.1	2306.69	146.1	1767.7	146.2	28.8625	146.2	15.4102
146.3	114.917	146.3	-5.81561	146.2	780.258	146.2	17.3297	146.2	2306.73	146.2	1767.68	146.3	28.9445	146.3	15.4055
146.4	115.039	146.4	-5.82031	146.3	780.281	146.3	17.3398	146.3	2306.8	146.3	1767.67	146.4	29.0211	146.4	15.3953
146.5	115.191	146.5	-5.82031	146.4	780.313	146.4	17.3414	146.4	2306.86	146.4	1767.67	146.5	29.0844	146.5	15.4023
146.6	115.313	146.6	-5.82501	146.5	780.328	146.5	17.332	146.5	2306.92	146.5	1767.66	146.6	29.1789	146.6	15.4023
146.7	115.461	146.7	-5.83203	146.6	780.348	146.6	17.3398	146.6	2306.98	146.6	1767.65	146.7	29.2609	146.7	15.4055
146.8	115.594	146.8	-5.83203	146.7	780.359	146.7	17.3297	146.7	2307.06	146.7	1767.64	146.8	29.3351	146.8	15.3984
146.9	115.737	146.9	-5.83203	146.8	780.379	146.8	17.3281	146.8	2307.1	146.8	1767.62	146.9	29.4164	146.9	15.407
147	115.883	147	-5.83514	146.9	780.387	146.9	17.318	146.9	2307.15	146.9	1767.6	147	29.5062	147	15.4023
147.1	116.012	147.1	-5.83984	147	780.398	147	17.3203	147	2307.23	147	1767.6	147.1	29.5804	147.1	15.4055
147.2	116.133	147.2	-5.84454	147.1	780.413	147.1	17.3102	147.1	2307.28	147.1	1767.59	147.2	29.6469	147.2	15.3953
147.3	116.262	147.3	-5.84454	147.2	780.438	147.2	17.3125	147.2	2307.32	147.2	1767.58	147.3	29.7141	147.3	15.4023
147.4	116.405	147.4	-5.85468	147.3	780.457	147.3	17.3086	147.3	2307.38	147.3	1767.57	147.4	29.7828	147.4	15.3976
147.5	116.555	147.5	-5.85938	147.4	780.481	147.4	17.318	147.4	2307.46	147.4	1767.55	147.5	29.8164	147.5	15.3984
147.6	116.664	147.6	-5.85626	147.5	780.508	147.5	17.3203	147.5	2307.53	147.5	1767.53	147.6	29.8922	147.6	15.3906
147.7	116.764	147.7	-5.86639	147.6	780.52	147.6	17.3102	147.6	2307.61	147.6	1767.52	147.7	29.9648	147.7	15.3906
147.8	116.879	147.8	-5.87579	147.7	780.532	147.7	17.3008	147.7	2307.67	147.7	1767.51	147.8	30.0492	147.8	15.3859
147.9	117	147.9	-5.88281	147.8	780.559	147.8	17.3133	147.8	2307.75	147.8	1767.5	147.9	30.1156	147.9	15.3875
148	117.118	148	-5.88281	147.9	780.578	147.9	17.3133	147.9	2307.8	147.9	1767.48	148	30.1906	148	15.3828
148.1	117.213	148.1	-5.87421	148	780.609	148	17.3133	148	2307.88	148	1767.47	148.1	30.2679	148.1	15.3781
148.2	117.348	148.2	-5.88361	148.1	780.624	148.1	17.3219	148.1	2307.96	148.1	1767.46	148.2	30.3625	148.2	15.3711
148.3	117.492	148.3	-5.89063	148.2	780.648	148.2	17.3125	148.2	2308.03	148.2	1767.45	148.3	30.4476	148.3	15.3594
148.4	117.612	148.4	-5.88593	148.3	780.668	148.3	17.3055	148.3	2308.12	148.3	1767.45	148.4	30.5211	148.4	15.368
148.5	117.716	148.5	-5.89063	148.4	780.676	148.4	17.3008	148.4	2308.19	148.4	1767.43	148.5	30.6086	148.5	15.3664
148.6	117.835	148.6	-5.89532	148.5	780.692	148.5	17.2985	148.5	2308.26	148.5	1767.42	148.6	30.7101	148.6	15.3594
148.7	117.98	148.7	-5.90234	148.6	780.719	148.6	17.3055	148.6	2308.32	148.6	1767.41	148.7	30.7844	148.7	15.3664
148.8	118.121	148.8	-5.89532	148.7	780.741	148.7	17.2977	148.7	2308.37	148.7	1767.42	148.8	30.8336	148.8	15.3563
148.9	118.226	148.9	-5.90546	148.8	780.777	148.8	17.3008	148.8	2308.43	148.8	1767.4	148.9	30.9016	148.9	15.3516
149	118.32	149	-5.91486	148.9	780.797	148.9	17.2859	148.9	2308.49	148.9	1767.4	149	30.9672	149	15.3664
149.1	118.45	149.1	-5.92499	149	780.816	149	17.2859	149	2308.56	149	1767.4	149.1	31.0539	149.1	15.3563
149.2	118.573	149.2	-5.92969	149.1	780.841	149.1	17.2891	149.1	2308.63	149.1	1767.4	149.2	31.1125	149.2	15.3594
[truncated: 6,914 more rows]
