# Supplementary material for: Mutational phospho-mimicry reveals a regulatory role for the XRCC4 and XLF C-terminal tails in modulating DNA bridging during classical non-homologous end joining
Source: eLife journal article supplement (doi:10.7554/elife.22900), 2017-05-13
Supplement: supp [file elife-22900-supp-v1.zip › elife_poa_e22900_Figure_8_source_data_1.txt.txt]

Time	X4-WT_8uM	Time	X4-WT_4uM	Time	X4-WT_2uM	Time	X4-WT_1uM	Time	X4-WT_0.5uM	Time	X4-WT_0.25uM	Time	X4-WT_0.125uM
s	RU	s	RU	s	RU	s	RU	s	RU	s	RU	s	RU
-52.7	4.92969	-52.8	4.36407	-52.6	-1.06323	-52.6	-1.62964	-52.6	-0.828125	-52.6	0.453918	-52.6	2
-52.6	4.85156	-52.7	4.29376	-52.5	-1.01245	-52.5	-1.69214	-52.5	-0.90625	-52.5	0.266418	-52.5	1.89844
-52.5	4.80078	-52.6	4.26642	-52.4	-1.02417	-52.4	-1.68042	-52.4	-0.945313	-52.4	0.274231	-52.4	1.83984
-52.4	4.76953	-52.5	4.18439	-52.3	-1.02417	-52.3	-1.71167	-52.3	-0.925781	-52.3	0.266418	-52.3	1.80859
-52.3	4.76172	-52.4	4.11407	-52.2	-1.01245	-52.2	-1.75073	-52.2	-0.957031	-52.2	0.2547	-52.2	1.78906
-52.2	4.71094	-52.3	4.05548	-52.1	-1.01245	-52.1	-1.80151	-52.1	-1.00781	-52.1	0.2547	-52.1	1.75
-52.1	4.67188	-52.2	4.02423	-52	-1.02417	-52	-1.85229	-52	-1.04688	-52	0.242981	-52	1.71875
-52	4.64063	-52.1	4.0047	-51.9	-1.0437	-51.9	-1.87183	-51.9	-1.06641	-51.9	0.235168	-51.9	1.67969
-51.9	4.60938	-52	3.96564	-51.8	-1.07495	-51.8	-1.89136	-51.8	-1.06641	-51.8	0.215637	-51.8	1.66797
-51.8	4.57031	-51.9	3.95392	-51.7	-1.09448	-51.7	-1.89917	-51.7	-1.08594	-51.7	0.196106	-51.7	1.64844
-51.7	4.55078	-51.8	3.92657	-51.6	-1.11401	-51.6	-1.91089	-51.6	-1.10547	-51.6	0.172668	-51.6	1.62109
-51.6	4.51953	-51.7	3.89532	-51.5	-1.14526	-51.5	-1.93042	-51.5	-1.125	-51.5	0.164856	-51.5	1.59766
-51.5	4.49219	-51.6	3.86407	-51.4	-1.16479	-51.4	-1.94214	-51.4	-1.14453	-51.4	0.145325	-51.4	1.55859
-51.4	4.44922	-51.5	3.84454	-51.3	-1.18433	-51.3	-1.96167	-51.3	-1.16797	-51.3	0.125793	-51.3	1.53906
-51.3	4.42969	-51.4	3.81329	-51.2	-1.20386	-51.2	-1.96948	-51.2	-1.1875	-51.2	0.106262	-51.2	1.5
-51.2	4.39844	-51.3	3.78595	-51.1	-1.22339	-51.1	-1.9812	-51.1	-1.19531	-51.1	0.0828247	-51.1	1.46875
-51.1	4.37891	-51.2	3.7547	-51	-1.23511	-51	-1.98901	-51	-1.21484	-51	0.055481	-51	1.44141
-51	4.35938	-51.1	3.71564	-50.9	-1.24292	-50.9	-2.00073	-50.9	-1.23828	-50.9	0.0359497	-50.9	1.41797
-50.9	4.32031	-51	3.68439	-50.8	-1.26245	-50.8	-2.02026	-50.8	-1.24609	-50.8	0.0164185	-50.8	1.39063
-50.8	4.28906	-50.9	3.66486	-50.7	-1.27417	-50.7	-2.03198	-50.7	-1.26563	-50.7	0.00469971	-50.7	1.35938
-50.7	4.26953	-50.8	3.63361	-50.6	-1.2937	-50.6	-2.03979	-50.6	-1.28516	-50.6	-0.0148315	-50.6	1.32813
-50.6	4.24219	-50.7	3.61407	-50.5	-1.31323	-50.5	-2.05933	-50.5	-1.30469	-50.5	-0.0265503	-50.5	1.28906
-50.5	4.21094	-50.6	3.59454	-50.4	-1.33276	-50.4	-2.07104	-50.4	-1.31641	-50.4	-0.0460815	-50.4	1.26953
-50.4	4.17969	-50.5	3.57501	-50.3	-1.35229	-50.3	-2.09058	-50.3	-1.34766	-50.3	-0.0656128	-50.3	1.23828
-50.3	4.16016	-50.4	3.54376	-50.2	-1.37183	-50.2	-2.11011	-50.2	-1.36719	-50.2	-0.085144	-50.2	1.21875
-50.2	4.14063	-50.3	3.52423	-50.1	-1.39526	-50.1	-2.12183	-50.1	-1.38672	-50.1	-0.104675	-50.1	1.19922
-50.1	4.10938	-50.2	3.5047	-50	-1.40308	-50	-2.14136	-50	-1.40625	-50	-0.116394	-50	1.16797
-50	4.08984	-50.1	3.48517	-49.9	-1.43433	-49.9	-2.16089	-49.9	-1.41797	-49.9	-0.135925	-49.9	1.14844
-49.9	4.05859	-50	3.50159	-49.8	-1.4585	-49.8	-2.16943	-49.8	-1.44995	-49.8	-0.150757	-49.8	1.11639
-49.8	4.03906	-49.9	3.54456	-49.7	-1.47266	-49.7	-2.18359	-49.7	-1.49146	-49.7	-0.160156	-49.7	1.07813
-49.7	4.00861	-49.8	3.57581	-49.6	-1.47339	-49.6	-2.21167	-49.6	-1.50464	-49.6	-0.162476	-49.6	1.03906
-49.6	4	-49.7	3.5625	-49.5	-1.46484	-49.5	-2.20068	-49.5	-1.5	-49.5	-0.155457	-49.5	0.980469
-49.5	3.98749	-49.6	3.53674	-49.4	-1.44604	-49.4	-2.17969	-49.4	-1.49536	-49.4	-0.171082	-49.4	0.949219
-49.4	3.96564	-49.5	3.52423	-49.3	-1.46558	-49.3	-2.16016	-49.3	-1.5	-49.3	-0.203125	-49.3	0.925781
-49.3	3.95624	-49.4	3.50781	-49.2	-1.46948	-49.2	-2.15381	-49.2	-1.51563	-49.2	-0.221069	-49.2	0.930481
-49.2	3.92657	-49.3	3.47815	-49.1	-1.46558	-49.1	-2.16016	-49.1	-1.53442	-49.1	-0.2453	-49.1	0.9375
-49.1	3.89063	-49.2	3.47345	-49	-1.46558	-49	-2.1499	-49	-1.53906	-49	-0.261719	-49	0.921082
-49	3.89063	-49.1	3.46173	-48.9	-1.46558	-48.9	-2.14844	-48.9	-1.53906	-48.9	-0.264038	-48.9	0.90625
-48.9	3.89532	-49	3.43439	-48.8	-1.45618	-48.8	-2.14526	-48.8	-1.53906	-48.8	-0.257019	-48.8	0.891418
-48.8	3.88593	-48.9	3.41956	-48.7	-1.45386	-48.7	-2.14844	-48.7	-1.53906	-48.7	-0.260132	-48.7	0.883606
-48.7	3.87579	-48.8	3.40314	-48.6	-1.45386	-48.6	-2.13354	-48.6	-1.54224	-48.6	-0.257019	-48.6	0.878906
-48.6	3.86639	-48.7	3.40314	-48.5	-1.43433	-48.5	-2.13818	-48.5	-1.53906	-48.5	-0.257019	-48.5	0.886719
-48.5	3.84454	-48.6	3.39142	-48.4	-1.43433	-48.4	-2.13672	-48.4	-1.53906	-48.4	-0.249207	-48.4	0.886719
-48.4	3.83514	-48.5	3.38361	-48.3	-1.43433	-48.3	-2.14526	-48.3	-1.53906	-48.3	-0.249207	-48.3	0.886719
-48.3	3.83673	-48.4	3.36877	-48.2	-1.43359	-48.2	-2.13354	-48.2	-1.53125	-48.2	-0.252319	-48.2	0.878906
-48.2	3.8172	-48.3	3.35236	-48.1	-1.41479	-48.1	-2.12891	-48.1	-1.53125	-48.1	-0.261719	-48.1	0.875
-48.1	3.79608	-48.2	3.34766	-48	-1.41479	-48	-2.12646	-48	-1.51953	-48	-0.271851	-48	0.886719
-48	3.78595	-48.1	3.33441	-47.9	-1.41479	-47.9	-2.13354	-47.9	-1.51794	-47.9	-0.288269	-47.9	0.891418
-47.9	3.77655	-48	3.32813	-47.8	-1.4187	-47.8	-2.14063	-47.8	-1.51245	-47.8	-0.288269	-47.8	0.898438
-47.8	3.76642	-47.9	3.31329	-47.7	-1.4187	-47.7	-2.13354	-47.7	-1.51953	-47.7	-0.288269	-47.7	0.899231
-47.7	3.75702	-47.8	3.31018	-47.6	-1.41406	-47.6	-2.13672	-47.6	-1.51953	-47.6	-0.291382	-47.6	0.90625
-47.6	3.74689	-47.7	3.29376	-47.5	-1.40698	-47.5	-2.14136	-47.5	-1.51013	-47.5	-0.3078	-47.5	0.91095
-47.5	3.73358	-47.6	3.27734	-47.4	-1.40698	-47.4	-2.13354	-47.4	-1.50464	-47.4	-0.3078	-47.4	0.917969
-47.4	3.72345	-47.5	3.2641	-47.3	-1.41016	-47.3	-2.13354	-47.3	-1.50317	-47.3	-0.330444	-47.3	0.917969
-47.3	3.71564	-47.4	3.24298	-47.2	-1.42188	-47.2	-2.12573	-47.2	-1.50781	-47.2	-0.335144	-47.2	0.917969
-47.2	3.70624	-47.3	3.23517	-47.1	-1.41162	-47.1	-2.11719	-47.1	-1.50781	-47.1	-0.335144	-47.1	0.917969
-47.1	3.69141	-47.2	3.23517	-47	-1.4187	-47	-2.12646	-47	-1.49536	-47	-0.327332	-47	0.922668
-47	3.67657	-47.1	3.23126	-46.9	-1.40698	-46.9	-2.12573	-46.9	-1.48828	-46.9	-0.327332	-46.9	0.917969
-46.9	3.67499	-47	3.23596	-46.8	-1.40234	-46.8	-2.11719	-46.8	-1.47656	-46.8	-0.334351	-46.8	0.917969
-46.8	3.66486	-46.9	3.24298	-46.7	-1.39526	-46.7	-2.12183	-46.7	-1.46875	-46.7	-0.327332	-46.7	0.930481
-46.7	3.65546	-46.8	3.24298	-46.6	-1.39917	-46.6	-2.12573	-46.6	-1.46875	-46.6	-0.327332	-46.6	0.940613
-46.6	3.64532	-46.7	3.24298	-46.5	-1.39453	-46.5	-2.11719	-46.5	-1.46094	-46.5	-0.327332	-46.5	0.953918
-46.5	3.63593	-46.6	3.23126	-46.4	-1.37109	-46.4	-2.11401	-46.4	-1.44922	-46.4	-0.314819	-46.4	0.961731
-46.4	3.63361	-46.5	3.22815	-46.3	-1.36401	-46.3	-2.09448	-46.3	-1.44458	-46.3	-0.300781	-46.3	0.957031
-46.3	3.61328	-46.4	3.23828	-46.2	-1.35156	-46.2	-2.08594	-46.2	-1.42969	-46.2	-0.295288	-46.2	0.952332
-46.2	3.58984	-46.3	3.24066	-46.1	-1.34448	-46.1	-2.08276	-46.1	-1.42969	-46.1	-0.291382	-46.1	0.945313
-46.1	3.58203	-46.2	3.24298	-46	-1.34448	-46	-2.08276	-46	-1.42188	-46	-0.27655	-46	0.946899
-46	3.5672	-46.1	3.24298	-45.9	-1.3335	-45.9	-2.06323	-45.9	-1.41724	-45.9	-0.27655	-45.9	0.952332
-45.9	3.54608	-46	3.23828	-45.8	-1.31555	-45.8	-2.06323	-45.8	-1.41016	-45.8	-0.27655	-45.8	0.9422
-45.8	3.53595	-45.9	3.23285	-45.7	-1.31323	-45.7	-2.05542	-45.7	-1.39844	-45.7	-0.27655	-45.7	0.9375
-45.7	3.52655	-45.8	3.23517	-45.6	-1.30542	-45.6	-2.04688	-45.6	-1.38599	-45.6	-0.264038	-45.6	0.921082
-45.6	3.51172	-45.7	3.23517	-45.5	-1.30078	-45.5	-2.0437	-45.5	-1.36719	-45.5	-0.261719	-45.5	0.914063
-45.5	3.49298	-45.6	3.23517	-45.4	-1.2937	-45.4	-2.03198	-45.4	-1.37109	-45.4	-0.280457	-45.4	0.915649
-45.4	3.48517	-45.5	3.22345	-45.3	-1.29053	-45.3	-2.02417	-45.3	-1.35474	-45.3	-0.27887	-45.3	0.913269
-45.3	3.47577	-45.4	3.21173	-45.2	-1.28589	-45.2	-2.02417	-45.2	-1.33984	-45.2	-0.27655	-45.2	0.903137
-45.2	3.46564	-45.3	3.1969	-45.1	-1.28516	-45.1	-2.01953	-45.1	-1.33984	-45.1	-0.264832	-45.1	0.893738
-45.1	3.44452	-45.2	3.18439	-45	-1.27808	-45	-2.01245	-45	-1.3313	-45	-0.253906	-45	0.883606
-45	3.42969	-45.1	3.18439	-44.9	-1.27808	-44.9	-2.00464	-44.9	-1.32495	-44.9	-0.24762	-44.9	0.886719
-44.9	3.41016	-45	3.17737	-44.8	-1.27808	-44.8	-1.98511	-44.8	-1.31873	-44.8	-0.237488	-44.8	0.875
-44.8	3.39063	-44.9	3.18439	-44.7	-1.28516	-44.7	-1.98511	-44.7	-1.30859	-44.7	-0.237488	-44.7	0.875
-44.7	3.37579	-44.8	3.17267	-44.6	-1.27808	-44.6	-1.97656	-44.6	-1.30859	-44.6	-0.237488	-44.6	0.871887
-44.6	3.35468	-44.7	3.16486	-44.5	-1.26953	-44.5	-1.96875	-44.5	-1.29688	-44.5	-0.221069	-44.5	0.862488
-44.5	3.34454	-44.6	3.15314	-44.4	-1.26636	-44.4	-1.94214	-44.4	-1.28906	-44.4	-0.225769	-44.4	0.84375
-44.4	3.33514	-44.5	3.15002	-44.3	-1.26636	-44.3	-1.93115	-44.3	-1.28442	-44.3	-0.217957	-44.3	0.832825
-44.3	3.32501	-44.4	3.13361	-44.2	-1.25	-44.2	-1.91321	-44.2	-1.26953	-44.2	-0.225769	-44.2	0.832825
-44.2	3.30548	-44.3	3.13361	-44.1	-1.22339	-44.1	-1.8999	-44.1	-1.25781	-44.1	-0.217957	-44.1	0.815613
-44.1	3.29608	-44.2	3.11096	-44	-1.21558	-44	-1.87891	-44	-1.25781	-44	-0.221069	-44	0.804688
-44	3.29767	-44.1	3.08673	-43.9	-1.22803	-43.9	-1.87183	-43.9	-1.25781	-43.9	-0.230469	-43.9	0.801575
-43.9	3.29297	-44	3.07031	-43.8	-1.25	-43.8	-1.87646	-43.8	-1.26953	-43.8	-0.232788	-43.8	0.811707
-43.8	3.27655	-43.9	3.06329	-43.7	-1.24683	-43.7	-1.88586	-43.7	-1.25317	-43.7	-0.237488	-43.7	0.801575
-43.7	3.2547	-43.8	3.04846	-43.6	-1.24219	-43.6	-1.86865	-43.6	-1.25464	-43.6	-0.217957	-43.6	0.785156
-43.6	3.24219	-43.7	3.03906	-43.5	-1.23193	-43.5	-1.84448	-43.5	-1.23755	-43.5	-0.222656	-43.5	0.782043
-43.5	3.22577	-43.6	3.02032	-43.4	-1.21948	-43.4	-1.83984	-43.4	-1.21875	-43.4	-0.232788	-43.4	0.772644
-43.4	3.21564	-43.5	3.0141	-43.3	-1.22266	-43.3	-1.81323	-43.3	-1.21875	-43.3	-0.237488	-43.3	0.762512
-43.3	3.20313	-43.4	3.00781	-43.2	-1.21558	-43.2	-1.80859	-43.2	-1.21875	-43.2	-0.240601	-43.2	0.753113
-43.2	3.17499	-43.3	2.99768	-43.1	-1.21558	-43.1	-1.80151	-43.1	-1.21411	-43.1	-0.257019	-43.1	0.746094
-43.1	3.16486	-43.2	2.99298	-43	-1.20776	-43	-1.79688	-43	-1.21875	-43	-0.25	-43	0.747681
-43	3.15234	-43.1	2.98828	-42.9	-1.2179	-42.9	-1.78198	-42.9	-1.2063	-42.9	-0.264038	-42.9	0.738281
-42.9	3.12579	-43	2.96643	-42.8	-1.22021	-42.8	-1.771	-42.8	-1.20703	-42.8	-0.257019	-42.8	0.738281
-42.8	3.11639	-42.9	2.96173	-42.7	-1.22729	-42.7	-1.75464	-42.7	-1.19922	-42.7	-0.257019	-42.7	0.726563
-42.7	3.10626	-42.8	2.95081	-42.6	-1.22729	-42.6	-1.75	-42.6	-1.17969	-42.6	-0.271851	-42.6	0.726563
-42.6	3.09686	-42.7	2.92969	-42.5	-1.23047	-42.5	-1.72339	-42.5	-1.17969	-42.5	-0.27655	-42.5	0.703918
-42.5	3.07501	-42.6	2.91956	-42.4	-1.23511	-42.4	-1.70386	-42.4	-1.17505	-42.4	-0.27655	-42.4	0.6875
-42.4	3.06561	-42.5	2.91016	-42.3	-1.22266	-42.3	-1.69141	-42.3	-1.16797	-42.3	-0.271851	-42.3	0.671082
-42.3	3.05548	-42.4	2.89142	-42.2	-1.21558	-42.2	-1.68433	-42.2	-1.17114	-42.2	-0.27655	-42.2	0.66095
-42.2	3.03595	-42.3	2.89301	-42.1	-1.2124	-42.1	-1.67969	-42.1	-1.16479	-42.1	-0.28125	-42.1	0.65625
-42.1	3.03436	-42.2	2.88361	-42	-1.20313	-42	-1.66479	-42	-1.16016	-42	-0.280457	-42	0.636719
-42	3.01953	-42.1	2.88361	-41.9	-1.18823	-41.9	-1.64844	-41.9	-1.14844	-41.9	-0.283569	-41.9	0.625
-41.9	3.00781	-42	2.89532	-41.8	-1.18823	-41.8	-1.63354	-41.8	-1.15076	-41.8	-0.283569	-41.8	0.634399
-41.8	3.0047	-41.9	2.88361	-41.7	-1.18359	-41.7	-1.63354	-41.7	-1.14844	-41.7	-0.28125	-41.7	0.643738
-41.7	3	-41.8	2.87659	-41.6	-1.17651	-41.6	-1.62891	-41.6	-1.14844	-41.6	-0.283569	-41.6	0.625
-41.6	2.99219	-41.7	2.87579	-41.5	-1.16406	-41.5	-1.60693	-41.5	-1.12427	-41.5	-0.268738	-41.5	0.621887
-41.5	2.96564	-41.6	2.86407	-41.4	-1.15234	-41.4	-1.6062	-41.4	-1.10229	-41.4	-0.244507	-41.4	0.617188
-41.4	2.95313	-41.5	2.87189	-41.3	-1.12256	-41.3	-1.59766	-41.3	-1.10474	-41.3	-0.233582	-41.3	0.617188
-41.3	2.94452	-41.4	2.86407	-41.2	-1.08118	-41.2	-1.60693	-41.2	-1.08521	-41.2	-0.234375	-41.2	0.632813
-41.2	2.9422	-41.3	2.86957	-41.1	-1.03125	-41.1	-1.62183	-41.1	-1.05542	-41.1	-0.217163	-41.1	0.644531
-41.1	2.92969	-41.2	2.88361	-41	-1.01318	-41	-1.62891	-41	-1.05078	-41	-0.186707	-41	0.646118
-41	2.90704	-41.1	2.87579	-40.9	-0.984375	-40.9	-1.63354	-40.9	-1.03748	-40.9	-0.174194	-40.9	0.648438
-40.9	2.90234	-41	2.86407	-40.8	-0.972656	-40.8	-1.62183	-40.8	-1.03125	-40.8	-0.142944	-40.8	0.644531
-40.8	2.90234	-40.9	2.86017	-40.7	-0.957764	-40.7	-1.61401	-40.7	-1.02417	-40.7	-0.128113	-40.7	0.648438
-40.7	2.89532	-40.8	2.87659	-40.6	-0.949219	-40.6	-1.61719	-40.6	-1.01404	-40.6	-0.100769	-40.6	0.628906
-40.6	2.91016	-40.7	2.87189	-40.5	-0.96167	-40.5	-1.61865	-40.5	-0.968018	-40.5	-0.0890503	-40.5	0.604675
-40.5	2.91797	-40.6	2.86017	-40.4	-0.978027	-40.4	-1.61401	-40.4	-0.917969	-40.4	-0.0765381	-40.4	0.575012
-40.4	2.92889	-40.5	2.83673	-40.3	-1.01245	-40.3	-1.62109	-40.3	-0.897705	-40.3	-0.0452881	-40.3	0.565613
-40.3	2.89532	-40.4	2.78595	-40.2	-1.04834	-40.2	-1.60229	-40.2	-0.816406	-40.2	-0.0460815	-40.2	0.527344
-40.2	2.85547	-40.3	2.73907	-40.1	-1.07813	-40.1	-1.59766	-40.1	-0.78833	-40.1	-0.0890503	-40.1	0.524231
-40.1	2.78751	-40.2	2.65625	-40	-1.10693	-40	-1.60229	-40	-0.94458	-40	-0.164063	-40	0.510925
-40	2.69061	-40.1	2.58203	-39.9	-1.12891	-39.9	-1.59448	-39.9	-1.26404	-39.9	-0.239075	-39.9	0.508606
-39.9	2.57422	-40	2.54376	-39.8	-1.12256	-39.8	-1.59448	-39.8	-1.50623	-39.8	-0.327332	-39.8	0.520325
-39.8	2.41953	-39.9	2.51331	-39.7	-1.10938	-39.7	-1.58276	-39.7	-1.65234	-39.7	-0.461731	-39.7	0.527344
-39.7	2.32422	-39.8	2.47266	-39.6	-1.11865	-39.6	-1.57813	-39.6	-1.65942	-39.6	-0.569519	-39.6	0.546875
-39.6	2.28516	-39.7	2.42657	-39.5	-1.13672	-39.5	-1.57495	-39.5	-1.57349	-39.5	-0.628906	-39.5	0.543762
-39.5	2.26251	-39.6	2.38672	-39.4	-1.16162	-39.4	-1.56323	-39.4	-1.49146	-39.4	-0.606995	-39.4	0.52655
-39.4	2.28986	-39.5	2.38129	-39.3	-1.15234	-39.3	-1.56323	-39.3	-1.42114	-39.3	-0.52655	-39.3	0.520325
-39.3	2.35547	-39.4	2.38672	-39.2	-1.11243	-39.2	-1.56323	-39.2	-1.35864	-39.2	-0.462463	-39.2	0.530457
-39.2	2.40625	-39.3	2.41644	-39.1	-1.04761	-39.1	-1.56641	-39.1	-1.30786	-39.1	-0.416382	-39.1	0.571899
-39.1	2.45468	-39.2	2.4469	-39	-1.00391	-39	-1.56323	-39	-1.26489	-39	-0.362488	-39	0.600769
-39	2.48828	-39.1	2.47345	-38.9	-0.973389	-38.9	-1.57104	-38.9	-1.23511	-38.9	-0.319519	-38.9	0.610168
-38.9	2.5	-39	2.49298	-38.8	-0.957764	-38.8	-1.58594	-38.8	-1.21411	-38.8	-0.295288	-38.8	0.6297
-38.8	2.50781	-38.9	2.49768	-38.7	-0.93042	-38.7	-1.5874	-38.7	-1.20313	-38.7	-0.283569	-38.7	0.66095
-38.7	2.51953	-38.8	2.51251	-38.6	-0.894531	-38.6	-1.58984	-38.6	-1.16724	-38.6	-0.264038	-38.6	0.667969
-38.6	2.5289	-38.7	2.52032	-38.5	-0.863281	-38.5	-1.58276	-38.5	-1.12817	-38.5	-0.226563	-38.5	0.683594
-38.5	2.53125	-38.6	2.54456	-38.4	-0.824219	-38.4	-1.57495	-38.4	-1.08984	-38.4	-0.197632	-38.4	0.714844
-38.4	2.53906	-38.5	2.57581	-38.3	-0.778076	-38.3	-1.54761	-38.3	-1.0625	-38.3	-0.159363	-38.3	0.734375
-38.3	2.55078	-38.4	2.58752	-38.2	-0.766357	-38.2	-1.51172	-38.2	-1.04614	-38.2	-0.138245	-38.2	0.739075
-38.2	2.55859	-38.3	2.58594	-38.1	-0.754639	-38.1	-1.49683	-38.1	-1.01953	-38.1	-0.113281	-38.1	0.746094
-38.1	2.58282	-38.2	2.59064	-38	-0.735107	-38	-1.48047	-38	-1.00708	-38	-0.0999756	-38	0.746094
-38	2.59296	-38.1	2.58752	-37.9	-0.734375	-37.9	-1.47339	-37.9	-0.983643	-37.9	-0.0921631	-37.9	0.747681
-37.9	2.61407	-38	2.57501	-37.8	-0.715576	-37.8	-1.46094	-37.8	-0.96875	-37.8	-0.101563	-37.8	0.757813
-37.8	2.61407	-37.9	2.56329	-37.7	-0.696045	-37.7	-1.44214	-37.7	-0.964844	-37.7	-0.111694	-37.7	0.753113
-37.7	2.60938	-37.8	2.56329	-37.6	-0.688232	-37.6	-1.43433	-37.6	-0.949219	-37.6	-0.104675	-37.6	0.734375
-37.6	2.60468	-37.7	2.57581	-37.5	-0.679688	-37.5	-1.43433	-37.5	-0.929688	-37.5	-0.108582	-37.5	0.734375
-37.5	2.59454	-37.6	2.56329	-37.4	-0.684326	-37.4	-1.41797	-37.4	-0.932861	-37.4	-0.108582	-37.4	0.731262
-37.4	2.58984	-37.5	2.53906	-37.3	-0.700684	-37.3	-1.40308	-37.3	-0.922607	-37.3	-0.104675	-37.3	0.711731
-37.3	2.59454	-37.4	2.52423	-37.2	-0.691406	-37.2	-1.39526	-37.2	-0.910156	-37.2	-0.116394	-37.2	0.699219
-37.2	2.60156	-37.3	2.51721	-37.1	-0.696045	-37.1	-1.39526	-37.1	-0.905518	-37.1	-0.111694	-37.1	0.6875
-37.1	2.60156	-37.2	2.51251	-37	-0.696045	-37	-1.38354	-37	-0.893799	-37	-0.101563	-37	0.6875
-37	2.58514	-37.1	2.5094	-36.9	-0.691406	-36.9	-1.37573	-36.9	-0.878906	-36.9	-0.111694	-36.9	0.6875
-36.9	2.57501	-37	2.5047	-36.8	-0.684326	-36.8	-1.37109	-36.8	-0.864014	-36.8	-0.116394	-36.8	0.679688
-36.8	2.58282	-36.9	2.51721	-36.7	-0.681152	-36.7	-1.35229	-36.7	-0.854736	-36.7	-0.111694	-36.7	0.667969
-36.7	2.58514	-36.8	2.53906	-36.6	-0.664063	-36.6	-1.34766	-36.6	-0.859375	-36.6	-0.104675	-36.6	0.664856
-36.6	2.57501	-36.7	2.53674	-36.5	-0.648438	-36.5	-1.35229	-36.5	-0.843018	-36.5	-0.09375	-36.5	0.663269
-36.5	2.56561	-36.6	2.54376	-36.4	-0.637451	-36.4	-1.33667	-36.4	-0.823486	-36.4	-0.0843506	-36.4	0.653137
-36.4	2.55548	-36.5	2.55157	-36.3	-0.61792	-36.3	-1.30859	-36.3	-0.813232	-36.3	-0.0773315	-36.3	0.639832
-36.3	2.54297	-36.4	2.54376	-36.2	-0.606201	-36.2	-1.31006	-36.2	-0.78125	-36.2	-0.069519	-36.2	0.641418
-36.2	2.53125	-36.3	2.54846	-36.1	-0.601563	-36.1	-1.28821	-36.1	-0.75708	-36.1	-0.0648193	-36.1	0.636719
-36.1	2.51483	-36.2	2.54376	-36	-0.606201	-36	-1.25928	-36	-0.75	-36	-0.0491943	-36	0.636719
-36	2.5047	-36.1	2.54376	-35.9	-0.599121	-35.9	-1.25	-35.9	-0.738281	-35.9	-0.0578003	-35.9	0.633606
-35.9	2.49219	-36	2.54376	-35.8	-0.601563	-35.8	-1.23047	-35.8	-0.730469	-35.8	-0.0578003	-35.8	0.624207
-35.8	2.47577	-35.9	2.54065	-35.7	-0.606201	-35.7	-1.21167	-35.7	-0.721069	-35.7	-0.0578003	-35.7	0.614075
-35.7	2.46564	-35.8	2.51953	-35.6	-0.609375	-35.6	-1.20386	-35.6	-0.71167	-35.6	-0.0578003	-35.6	0.600769
-35.6	2.45782	-35.7	2.51251	-35.5	-0.618652	-35.5	-1.20703	-35.5	-0.710938	-35.5	-0.0578003	-35.5	0.602356
-35.5	2.45313	-35.6	2.5141	-35.4	-0.625732	-35.4	-1.20386	-35.4	-0.702393	-35.4	-0.0609131	-35.4	0.597656
-35.4	2.43671	-35.5	2.51172	-35.3	-0.61792	-35.3	-1.20386	-35.3	-0.6875	-35.3	-0.0656128	-35.3	0.602356
-35.3	2.41486	-35.4	2.50079	-35.2	-0.621094	-35.2	-1.20068	-35.2	-0.679688	-35.2	-0.0578003	-35.2	0.592957
-35.2	2.40234	-35.3	2.5094	-35.1	-0.625732	-35.1	-1.17969	-35.1	-0.671143	-35.1	-0.0460815	-35.1	0.571106
-35.1	2.40546	-35.2	2.5047	-35	-0.61792	-35	-1.18433	-35	-0.672607	-35	-0.0578003	-35	0.566406
-35	2.39999	-35.1	2.50781	-34.9	-0.621094	-34.9	-1.17578	-34.9	-0.66333	-34.9	-0.0609131	-34.9	0.578125
-34.9	2.39453	-35	2.50238	-34.8	-0.609375	-34.8	-1.18433	-34.8	-0.65625	-34.8	-0.0578003	-34.8	0.575012
-34.8	2.37811	-34.9	2.5047	-34.7	-0.603027	-34.7	-1.17261	-34.7	-0.65625	-34.7	-0.0656128	-34.7	0.561707
-34.7	2.37109	-34.8	2.5	-34.6	-0.589844	-34.6	-1.16797	-34.6	-0.660156	-34.6	-0.069519	-34.6	0.554688
-34.6	2.36798	-34.7	2.48126	-34.5	-0.58667	-34.5	-1.16553	-34.5	-0.651611	-34.5	-0.0804443	-34.5	0.546875
-34.5	2.36639	-34.6	2.48126	-34.4	-0.570313	-34.4	-1.17578	-34.4	-0.653076	-34.4	-0.0820313	-34.4	0.551575
-34.4	2.36407	-34.5	2.48596	-34.3	-0.563232	-34.3	-1.17261	-34.3	-0.65625	-34.3	-0.0921631	-34.3	0.546875
-34.3	2.35156	-34.4	2.48987	-34.2	-0.563232	-34.2	-1.16162	-34.2	-0.660156	-34.2	-0.101563	-34.2	0.546875
-34.2	2.34686	-34.3	2.48517	-34.1	-0.567139	-34.1	-1.1554	-34.1	-0.643799	-34.1	-0.100769	-34.1	0.546875
-34.1	2.34454	-34.2	2.47345	-34	-0.567139	-34	-1.1499	-34	-0.644531	-34	-0.0921631	-34	0.551575
-34	2.33203	-34.1	2.47345	-33.9	-0.5625	-33.9	-1.12109	-33.9	-0.653076	-33.9	-0.0968628	-33.9	0.546875
-33.9	2.32343	-34	2.47345	-33.8	-0.543701	-33.8	-1.11401	-33.8	-0.66333	-33.8	-0.0968628	-33.8	0.543762
-33.8	2.31329	-33.9	2.45862	-33.7	-0.54834	-33.7	-1.10547	-33.7	-0.660156	-33.7	-0.103882	-33.7	0.534363
-33.7	2.32031	-33.8	2.45392	-33.6	-0.5625	-33.6	-1.10229	-33.6	-0.66333	-33.6	-0.0999756	-33.6	0.535156
-33.6	2.3172	-33.7	2.4375	-33.5	-0.55542	-33.5	-1.09912	-33.5	-0.667969	-33.5	-0.101563	-33.5	0.532043
-33.5	2.31561	-33.6	2.42737	-33.4	-0.558594	-33.4	-1.09766	-33.4	-0.655518	-33.4	-0.104675	-33.4	0.527344
-33.4	2.32031	-33.5	2.41486	-33.3	-0.560059	-33.3	-1.09912	-33.3	-0.644531	-33.3	-0.108582	-33.3	0.522644
-33.3	2.30548	-33.4	2.40002	-33.2	-0.570313	-33.2	-1.08984	-33.2	-0.660889	-33.2	-0.0999756	-33.2	0.517212
-33.2	2.29297	-33.3	2.39844	-33.1	-0.567139	-33.1	-1.07495	-33.1	-0.66333	-33.1	-0.0898438	-33.1	0.527344
-33.1	2.27344	-33.2	2.40314	-33	-0.567139	-33	-1.06641	-33	-0.672607	-33	-0.103882	-33	0.546875
-33	2.26172	-33.1	2.39142	-32.9	-0.55542	-32.9	-1.06006	-32.9	-0.6875	-32.9	-0.0968628	-32.9	0.542175
-32.9	2.2453	-33	2.38129	-32.8	-0.550781	-32.8	-1.03906	-32.8	-0.679688	-32.8	-0.0999756	-32.8	0.551575
-32.8	2.23047	-32.9	2.37579	-32.7	-0.516357	-32.7	-1.02734	-32.7	-0.682861	-32.7	-0.104675	-32.7	0.551575
-32.7	2.21875	-32.8	2.37189	-32.6	-0.511719	-32.6	-1.00928	-32.6	-0.6875	-32.6	-0.0968628	-32.6	0.542175
-32.6	2.21094	-32.7	2.37891	-32.5	-0.501465	-32.5	-1	-32.5	-0.679688	-32.5	-0.0773315	-32.5	0.532043
-32.5	2.19611	-32.6	2.36877	-32.4	-0.495239	-32.4	-0.985107	-32.4	-0.667969	-32.4	-0.0773315	-32.4	0.539063
-32.4	2.17188	-32.5	2.36096	-32.3	-0.481934	-32.3	-0.957764	-32.3	-0.660156	-32.3	-0.0648193	-32.3	0.527344
-32.3	2.15546	-32.4	2.35156	-32.2	-0.457764	-32.2	-0.944458	-32.2	-0.648438	-32.2	-0.0460815	-32.2	0.532043
-32.2	2.14532	-32.3	2.34064	-32.1	-0.441406	-32.1	-0.919434	-32.1	-0.639038	-32.1	-0.038269	-32.1	0.527344
-32.1	2.14532	-32.2	2.31799	-32	-0.429688	-32	-0.910156	-32	-0.633545	-32	-0.0218506	-32	0.522644
-32	2.13593	-32.1	2.30548	-31.9	-0.422607	-31.9	-0.903076	-31.9	-0.643799	-31.9	-0.00701904	-31.9	0.515625
-31.9	2.12891	-32	2.29376	-31.8	-0.426514	-31.8	-0.898438	-31.8	-0.633545	-31.8	0.0078125	-31.8	0.520325
-31.8	2.13361	-31.9	2.28204	-31.7	-0.431152	-31.7	-0.891357	-31.7	-0.624268	-31.7	0.0250244	-31.7	0.527344
-31.7	2.12421	-31.8	2.28204	-31.6	-0.429688	-31.6	-0.883545	-31.6	-0.628906	-31.6	0.0367432	-31.6	0.527344
-31.6	2.10626	-31.7	2.27893	-31.5	-0.434326	-31.5	-0.895264	-31.5	-0.621094	-31.5	0.0664063	-31.5	0.532043
-31.5	2.10156	-31.6	2.25781	-31.4	-0.453857	-31.4	-0.895264	-31.4	-0.621094	-31.4	0.0726929	-31.4	0.522644
-31.4	2.08984	-31.5	2.24768	-31.3	-0.485107	-31.3	-0.898438	-31.3	-0.612549	-31.3	0.0828247	-31.3	0.512512
-31.3	2.07501	-31.4	2.22345	-31.2	-0.5	-31.2	-0.907715	-31.2	-0.614014	-31.2	0.0945435	-31.2	0.507813
-31.2	2.06561	-31.3	2.21173	-31.1	-0.504639	-31.1	-0.914795	-31.1	-0.619507	-31.1	0.107056	-31.1	0.512512
-31.1	2.05078	-31.2	2.21173	-31	-0.493652	-31	-0.917969	-31	-0.602295	-31	0.121094	-31	0.519531
-31	2.02423	-31.1	2.1922	-30.9	-0.495239	-30.9	-0.922607	-30.9	-0.604736	-30.9	0.121887	-30.9	0.514832
-30.9	2.02344	-31	2.18207	-30.8	-0.497559	-30.8	-0.922607	-30.8	-0.597656	-30.8	0.126587	-30.8	0.503906
-30.8	2.00391	-30.9	2.17969	-30.7	-0.507813	-30.7	-0.921875	-30.7	-0.602295	-30.7	0.125793	-30.7	0.515625
-30.7	1.9953	-30.8	2.14532	-30.6	-0.516357	-30.6	-0.914795	-30.6	-0.604736	-30.6	0.121887	-30.6	0.525024
-30.6	1.98517	-30.7	2.13361	-30.5	-0.516357	-30.5	-0.917969	-30.5	-0.609375	-30.5	0.133606	-30.5	0.519531
-30.5	1.98358	-30.6	2.11407	-30.4	-0.516357	-30.4	-0.927246	-30.4	-0.609375	-30.4	0.138306	-30.4	0.514832
-30.4	1.97345	-30.5	2.08752	-30.3	-0.516357	-30.3	-0.949219	-30.3	-0.621094	-30.3	0.133606	-30.3	0.512512
-30.3	1.96094	-30.4	2.08984	-30.2	-0.516357	-30.2	-0.958496	-30.2	-0.607788	-30.2	0.145325	-30.2	0.503113
-30.2	1.96094	-30.3	2.08282	-30.1	-0.53125	-30.1	-0.96875	-30.1	-0.597656	-30.1	0.153137	-30.1	0.492981
-30.1	1.95313	-30.2	2.07971	-30	-0.52417	-30	-0.966309	-30	-0.602295	-30	0.148438	-30	0.496094
-30	1.94922	-30.1	2.06329	-29.9	-0.528809	-29.9	-0.985107	-29.9	-0.604736	-29.9	0.138306	-29.9	0.496094
-29.9	1.94611	-30	2.06018	-29.8	-0.53125	-29.8	-0.980469	-29.8	-0.602295	-29.8	0.133606	-29.8	0.492981
-29.8	1.93671	-29.9	2.04376	-29.7	-0.539063	-29.7	-0.985107	-29.7	-0.596924	-29.7	0.118774	-29.7	0.491394
-29.7	1.93439	-29.8	2.03906	-29.6	-0.560059	-29.6	-0.99292	-29.6	-0.593018	-29.6	0.109375	-29.6	0.500793
-29.6	1.92499	-29.7	2.01251	-29.5	-0.574951	-29.5	-0.996094	-29.5	-0.582764	-29.5	0.102356	-29.5	0.485168
-29.5	1.91016	-29.6	1.98987	-29.4	-0.609375	-29.4	-1.00928	-29.4	-0.581299	-29.4	0.0875244	-29.4	0.471863
-29.4	1.89532	-29.5	1.97656	-29.3	-0.606201	-29.3	-1.00781	-29.3	-0.578125	-29.3	0.0898438	-29.3	0.464844
-29.3	1.89063	-29.4	1.97113	-29.2	-0.61084	-29.2	-1.02026	-29.2	-0.585938	-29.2	0.0906372	-29.2	0.461731
-29.2	1.87579	-29.3	1.97345	-29.1	-0.616333	-29.1	-1.02417	-29.1	-0.589844	-29.1	0.0875244	-29.1	0.46875
-29.1	1.86639	-29.2	1.97345	-29	-0.61084	-29	-1.02417	-29	-0.578125	-29	0.0828247	-29	0.471863
-29	1.85626	-29.1	1.97815	-28.9	-0.598389	-28.9	-1.00464	-28.9	-0.581299	-28.9	0.0875244	-28.9	0.466431
-28.9	1.84686	-29	1.96875	-28.8	-0.574219	-28.8	-1	-28.8	-0.578125	-28.8	0.078125	-28.8	0.46405
-28.8	1.83673	-28.9	1.96643	-28.7	-0.550781	-28.7	-0.980469	-28.7	-0.578125	-28.7	0.0750122	-28.7	0.457031
-28.7	1.83203	-28.8	1.97345	-28.6	-0.535889	-28.6	-0.958496	-28.6	-0.570313	-28.6	0.0632935	-28.6	0.464844
-28.6	1.82813	-28.7	1.97345	-28.5	-0.511719	-28.5	-0.946045	-28.5	-0.570313	-28.5	0.0437622	-28.5	0.464844
-28.5	1.83984	-28.6	1.97034	-28.4	-0.501465	-28.4	-0.929688	-28.4	-0.558594	-28.4	0.0367432	-28.4	0.469543
-28.4	1.83673	-28.5	1.96875	-28.3	-0.475708	-28.3	-0.910156	-28.3	-0.550781	-28.3	0.0320435	-28.3	0.476563
-28.3	1.82733	-28.4	1.96173	-28.2	-0.470215	-28.2	-0.891357	-28.2	-0.549194	-28.2	0.0273438	-28.2	0.464844
-28.2	1.82813	-28.3	1.95471	-28.1	-0.453125	-28.1	-0.888184	-28.1	-0.546875	-28.1	0.0336304	-28.1	0.478149
-28.1	1.81329	-28.2	1.95703	-28	-0.426514	-28	-0.890625	-28	-0.546875	-28	0.0390625	-28	0.479675
-28	1.8172	-28.1	1.9469	-27.9	-0.39917	-27.9	-0.859375	-27.9	-0.539063	-27.9	0.0320435	-27.9	0.500793
-27.9	1.8078	-28	1.9422	-27.8	-0.382813	-27.8	-0.844482	-27.8	-0.539063	-27.8	0.0367432	-27.8	0.512512
-27.8	1.80078	-27.9	1.93909	-27.7	-0.363281	-27.7	-0.817139	-27.7	-0.514893	-27.7	0.0320435	-27.7	0.527344
-27.7	1.78125	-27.8	1.93439	-27.6	-0.353027	-27.6	-0.78125	-27.6	-0.507813	-27.6	0.0390625	-27.6	0.527344
-27.6	1.76642	-27.7	1.9422	-27.5	-0.324219	-27.5	-0.769531	-27.5	-0.5	-27.5	0.0414429	-27.5	0.527344
-27.5	1.75702	-27.6	1.93439	-27.4	-0.292969	-27.4	-0.747559	-27.4	-0.5	-27.4	0.055481	-27.4	0.527344
-27.4	1.7547	-27.5	1.92267	-27.3	-0.278076	-27.3	-0.730469	-27.3	-0.491455	-27.3	0.0585938	-27.3	0.524231
-27.3	1.75	-27.4	1.92737	-27.2	-0.254639	-27.2	-0.710938	-27.2	-0.488281	-27.2	0.0515747	-27.2	0.522644
-27.2	1.73517	-27.3	1.92267	-27.1	-0.242188	-27.1	-0.700684	-27.1	-0.476563	-27.1	0.0562744	-27.1	0.512512
-27.1	1.72577	-27.2	1.92267	-27	-0.224121	-27	-0.679688	-27	-0.46875	-27	0.0515747	-27	0.507813
-27	1.71875	-27.1	1.92267	-26.9	-0.203125	-26.9	-0.672607	-26.9	-0.464111	-26.9	0.0562744	-26.9	0.507813
-26.9	1.71564	-27	1.92267	-26.8	-0.176514	-26.8	-0.656982	-26.8	-0.449219	-26.8	0.0632935	-26.8	0.520325
-26.8	1.71094	-26.9	1.91095	-26.7	-0.171875	-26.7	-0.633545	-26.7	-0.4375	-26.7	0.0632935	-26.7	0.539063
-26.7	1.71094	-26.8	1.91565	-26.6	-0.156982	-26.6	-0.621094	-26.6	-0.442139	-26.6	0.0758057	-26.6	0.539063
-26.6	1.70782	-26.7	1.91956	-26.5	-0.148438	-26.5	-0.609375	-26.5	-0.439819	-26.5	0.0945435	-26.5	0.546875
-26.5	1.69922	-26.6	1.92267	-26.4	-0.14209	-26.4	-0.614014	-26.4	-0.425781	-26.4	0.102356	-26.4	0.546875
-26.4	1.69452	-26.5	1.91486	-26.3	-0.128906	-26.3	-0.606934	-26.3	-0.414795	-26.3	0.102356	-26.3	0.546875
-26.3	1.68439	-26.4	1.91956	-26.2	-0.130371	-26.2	-0.609375	-26.2	-0.41333	-26.2	0.107056	-26.2	0.551575
-26.2	1.67499	-26.3	1.91486	-26.1	-0.132813	-26.1	-0.617188	-26.1	-0.410156	-26.1	0.114075	-26.1	0.553894
-26.1	1.66486	-26.2	1.91486	-26	-0.125732	-26	-0.614746	-26	-0.41333	-26	0.117188	-26	0.554688
-26	1.66016	-26.1	1.91797	-25.9	-0.11792	-25.9	-0.614014	-25.9	-0.40625	-25.9	0.107056	-25.9	0.567993
-25.9	1.66486	-26	1.91956	-25.8	-0.106201	-25.8	-0.614014	-25.8	-0.398438	-25.8	0.102356	-25.8	0.578125
-25.8	1.66718	-25.9	1.92267	-25.7	-0.101563	-25.7	-0.609375	-25.7	-0.398438	-25.7	0.102356	-25.7	0.597656
-25.7	1.66486	-25.8	1.92267	-25.6	-0.0866699	-25.6	-0.614014	-25.6	-0.390625	-25.6	0.102356	-25.6	0.597656
-25.6	1.65546	-25.7	1.91956	-25.5	-0.0703125	-25.5	-0.614014	-25.5	-0.378906	-25.5	0.110168	-25.5	0.602356
-25.5	1.64063	-25.6	1.89844	-25.4	-0.0632324	-25.4	-0.606201	-25.4	-0.371094	-25.4	0.0875244	-25.4	0.604675
-25.4	1.62579	-25.5	1.90002	-25.3	-0.0600586	-25.3	-0.597656	-25.3	-0.362549	-25.3	0.0953369	-25.3	0.605469
-25.3	1.62421	-25.4	1.89844	-25.2	-0.0507813	-25.2	-0.602295	-25.2	-0.364014	-25.2	0.0945435	-25.2	0.614075
-25.2	1.61407	-25.3	1.88831	-25.1	-0.0437012	-25.1	-0.594482	-25.1	-0.369507	-25.1	0.0976563	-25.1	0.617188
-25.1	1.60938	-25.2	1.89142	-25	-0.0390625	-25	-0.582764	-25	-0.355469	-25	0.0875244	-25	0.632019
-25	1.60156	-25.1	1.90002	-24.9	-0.0358887	-24.9	-0.582764	-24.9	-0.347656	-24.9	0.0828247	-24.9	0.633606
-24.9	1.58673	-25	1.89844	-24.8	-0.0288086	-24.8	-0.578125	-24.8	-0.344482	-24.8	0.0750122	-24.8	0.636719
-24.8	1.57733	-24.9	1.90002	-24.7	-0.03125	-24.7	-0.587402	-24.7	-0.338257	-24.7	0.0437622	-24.7	0.653137
-24.7	1.5672	-24.8	1.89532	-24.6	-0.0209961	-24.6	-0.589844	-24.6	-0.332764	-24.6	0.0437622	-24.6	0.643738
-24.6	1.55389	-24.7	1.90314	-24.5	-0.0195313	-24.5	-0.582764	-24.5	-0.339844	-24.5	0.0484619	-24.5	0.65625
-24.5	1.55548	-24.6	1.90002	-24.4	-0.0163574	-24.4	-0.578125	-24.4	-0.320313	-24.4	0.0320435	-24.4	0.66095
-24.4	1.54767	-24.5	1.90314	-24.3	-5.00222E-12	-24.3	-0.571045	-24.3	-0.308594	-24.3	0.0273438	-24.3	0.667969
-24.3	1.53827	-24.4	1.91016	-24.2	0.00244141	-24.2	-0.575684	-24.2	-0.292236	-24.2	0.0172119	-24.2	0.672668
-24.2	1.52423	-24.3	1.90002	-24.1	-5.00222E-12	-24.1	-0.574951	-24.1	-0.289063	-24.1	0.0125122	-24.1	0.674988
-24.1	1.52655	-24.2	1.89063	-24	0.0102539	-24	-0.570313	-24	-0.284424	-24	0.0125122	-24	0.672668
-24	1.51642	-24.1	1.88831	-23.9	0.0078125	-23.9	-0.563232	-23.9	-0.269531	-23.9	0.00469971	-23.9	0.671082
-23.9	1.51483	-24	1.87891	-23.8	0.0148926	-23.8	-0.55542	-23.8	-0.262451	-23.8	-0.00701904	-23.8	0.675781
-23.8	1.5047	-23.9	1.86407	-23.7	0.0180664	-23.7	-0.546875	-23.7	-0.261719	-23.7	-0.0148315	-23.7	0.680481
-23.7	1.49219	-23.8	1.86877	-23.6	0.0195313	-23.6	-0.543701	-23.6	-0.248413	-23.6	-0.0304565	-23.6	0.6875
-23.6	1.47577	-23.7	1.87189	-23.5	0.0344238	-23.5	-0.531982	-23.5	-0.24292	-23.5	-0.0218506	-23.5	0.6922
-23.5	1.48517	-23.6	1.86877	-23.4	0.0390625	-23.4	-0.515625	-23.4	-0.238281	-23.4	-0.0218506	-23.4	0.694519
-23.4	1.47266	-23.5	1.87109	-23.3	0.0539551	-23.3	-0.512451	-23.3	-0.233643	-23.3	-0.0265503	-23.3	0.6922
-23.3	1.46564	-23.4	1.85706	-23.2	0.0578613	-23.2	-0.504639	-23.2	-0.226563	-23.2	-0.0195313	-23.2	0.702332
-23.2	1.46796	-23.3	1.85938	-23.1	0.0539551	-23.1	-0.49292	-23.1	-0.21875	-23.1	-0.0218506	-23.1	0.703918
-23.1	1.46564	-23.2	1.85236	-23	0.0703125	-23	-0.49292	-23	-0.21875	-23	-0.0187378	-23	0.702332
-23	1.47577	-23.1	1.83752	-22.9	0.0805664	-22.9	-0.473389	-22.9	-0.210938	-22.9	-0.00701904	-22.9	0.711731
-22.9	1.47736	-23	1.82813	-22.8	0.0703125	-22.8	-0.453857	-22.8	-0.202393	-22.8	7.93457E-4	-22.8	0.699219
-22.8	1.47577	-22.9	1.82581	-22.7	0.0805664	-22.7	-0.449219	-22.7	-0.199219	-22.7	-0.00231934	-22.7	0.6922
-22.7	1.46875	-22.8	1.81799	-22.6	0.078125	-22.6	-0.438965	-22.6	-0.1875	-22.6	0.0078125	-22.6	0.694519
-22.6	1.46564	-22.7	1.80859	-22.5	0.0805664	-22.5	-0.4375	-22.5	-0.179688	-22.5	0.0125122	-22.5	0.6922
-22.5	1.46875	-22.6	1.79376	-22.4	0.0898438	-22.4	-0.434326	-22.4	-0.16333	-22.4	0.0336304	-22.4	0.694519
-22.4	1.47266	-22.5	1.77893	-22.3	0.0883789	-22.3	-0.434326	-22.3	-0.160889	-22.3	0.0437622	-22.3	0.6922
-22.3	1.46564	-22.4	1.76953	-22.2	0.0898438	-22.2	-0.422607	-22.2	-0.160156	-22.2	0.0437622	-22.2	0.679688
-22.2	1.46796	-22.3	1.76721	-22.1	0.0930176	-22.1	-0.426514	-22.1	-0.143799	-22.1	0.046875	-22.1	0.671082
-22.1	1.44922	-22.2	1.75781	-22	0.0969238	-22	-0.417969	-22	-0.140625	-22	0.0515747	-22	0.66095
-22	1.44611	-22.1	1.74768	-21.9	0.104736	-21.9	-0.419434	-21.9	-0.13208	-21.9	0.0609741	-21.9	0.660156
-21.9	1.43359	-22	1.7547	-21.8	0.109375	-21.8	-0.405396	-21.8	-0.121826	-21.8	0.0750122	-21.8	0.648438
-21.8	1.42499	-21.9	1.74768	-21.7	0.111816	-21.7	-0.391357	-21.7	-0.112549	-21.7	0.078125	-21.7	0.648438
-21.7	1.41486	-21.8	1.75	-21.6	0.109375	-21.6	-0.388184	-21.6	-0.109375	-21.6	0.0953369	-21.6	0.628906
-21.6	1.41406	-21.7	1.73987	-21.5	0.10791	-21.5	-0.378906	-21.5	-0.10083	-21.5	0.114075	-21.5	0.625
-21.5	1.41718	-21.6	1.71875	-21.4	0.109375	-21.4	-0.368652	-21.4	-0.0905762	-21.4	0.121887	-21.4	0.633606
-21.4	1.41486	-21.5	1.71173	-21.3	0.124268	-21.3	-0.367188	-21.3	-0.0898438	-21.3	0.130493	-21.3	0.621094
-21.3	1.41486	-21.4	1.70862	-21.2	0.128906	-21.2	-0.364014	-21.2	-0.0812988	-21.2	0.133606	-21.2	0.612488
-21.2	1.41406	-21.3	1.70081	-21.1	0.131348	-21.1	-0.347656	-21.1	-0.0827637	-21.1	0.141418	-21.1	0.590637
-21.1	1.39764	-21.2	1.69141	-21	0.128906	-21	-0.337402	-21	-0.0852051	-21	0.153137	-21	0.589844
-21	1.39063	-21.1	1.6922	-20.9	0.131348	-20.9	-0.335938	-20.9	-0.078125	-20.9	0.16095	-20.9	0.573425
-20.9	1.39532	-21	1.67267	-20.8	0.128906	-20.8	-0.337402	-20.8	-0.0617676	-20.8	0.164856	-20.8	0.571106
-20.8	1.39453	-20.9	1.65784	-20.7	0.13208	-20.7	-0.328125	-20.7	-0.0710449	-20.7	0.157837	-20.7	0.558594
-20.7	1.38593	-20.8	1.66486	-20.6	0.140625	-20.6	-0.313232	-20.6	-0.0617676	-20.6	0.160156	-20.6	0.546875
-20.6	1.37579	-20.7	1.65704	-20.5	0.150879	-20.5	-0.296875	-20.5	-0.0632324	-20.5	0.157837	-20.5	0.546875
-20.5	1.37109	-20.6	1.63361	-20.4	0.140625	-20.4	-0.29834	-20.4	-0.0734863	-20.4	0.16095	-20.4	0.532043
-20.4	1.37421	-20.5	1.62189	-20.3	0.13916	-20.3	-0.293701	-20.3	-0.078125	-20.3	0.164856	-20.3	0.534363
-20.3	1.37109	-20.4	1.61407	-20.2	0.140625	-20.2	-0.289063	-20.2	-0.0749512	-20.2	0.16095	-20.2	0.519531
-20.2	1.35626	-20.3	1.60236	-20.1	0.143799	-20.1	-0.27417	-20.1	-0.0852051	-20.1	0.172668	-20.1	0.512512
-20.1	1.35468	-20.2	1.58282	-20	0.160156	-20	-0.278809	-20	-0.0930176	-20	0.177368	-20	0.5
-20	1.35626	-20.1	1.56799	-19.9	0.162598	-19.9	-0.269531	-19.9	-0.09375	-19.9	0.179688	-19.9	0.488281
-19.9	1.35156	-20	1.56329	-19.8	0.16333	-19.8	-0.265625	-19.8	-0.110107	-19.8	0.177368	-19.8	0.483582
-19.8	1.34766	-19.9	1.55548	-19.7	0.160156	-19.7	-0.26709	-19.7	-0.117188	-19.7	0.1922	-19.7	0.47345
-19.7	1.35156	-19.8	1.54376	-19.6	0.158691	-19.6	-0.266357	-19.6	-0.13208	-19.6	0.203918	-19.6	0.46405
-19.6	1.33984	-19.7	1.54065	-19.5	0.151611	-19.5	-0.269531	-19.5	-0.136719	-19.5	0.208618	-19.5	0.461731
-19.5	1.33673	-19.6	1.53906	-19.4	0.160156	-19.4	-0.262451	-19.4	-0.133545	-19.4	0.22345	-19.4	0.457031
-19.4	1.33203	-19.5	1.52423	-19.3	0.155518	-19.3	-0.262451	-19.3	-0.13208	-19.3	0.21875	-19.3	0.4422
-19.3	1.32422	-19.4	1.49768	-19.2	0.160156	-19.2	-0.262451	-19.2	-0.133545	-19.2	0.228149	-19.2	0.444519
-19.2	1.31561	-19.3	1.48828	-19.1	0.16333	-19.1	-0.262451	-19.1	-0.13208	-19.1	0.228149	-19.1	0.4375
-19.1	1.30078	-19.2	1.47345	-19	0.17041	-19	-0.262451	-19	-0.13208	-19	0.230469	-19	0.4375
-19	1.28595	-19.1	1.45862	-18.9	0.172729	-18.9	-0.262451	-18.9	-0.141357	-18.9	0.228149	-18.9	0.4422
-18.9	1.28436	-19	1.44922	-18.8	0.17041	-18.8	-0.254639	-18.8	-0.13208	-18.8	0.238281	-18.8	0.441406
-18.8	1.28125	-18.9	1.43909	-18.7	0.175049	-18.7	-0.257813	-18.7	-0.133545	-18.7	0.239868	-18.7	0.425781
-18.7	1.27423	-18.8	1.42969	-18.6	0.179688	-18.6	-0.259277	-18.6	-0.136719	-18.6	0.238281	-18.6	0.4375
-18.6	1.26172	-18.7	1.41956	-18.5	0.17041	-18.5	-0.257813	-18.5	-0.143799	-18.5	0.247681	-18.5	0.4422
-18.5	1.25702	-18.6	1.40002	-18.4	0.167969	-18.4	-0.254639	-18.4	-0.136719	-18.4	0.238281	-18.4	0.4375
-18.4	1.25	-18.5	1.39532	-18.3	0.17041	-18.3	-0.246094	-18.3	-0.141357	-18.3	0.247681	-18.3	0.4328
-18.3	1.24298	-18.4	1.39844	-18.2	0.160156	-18.2	-0.247559	-18.2	-0.143799	-18.2	0.242981	-18.2	0.425781
-18.2	1.24219	-18.3	1.38049	-18.1	0.16333	-18.1	-0.238281	-18.1	-0.136719	-18.1	0.259399	-18.1	0.435181
-18.1	1.23517	-18.2	1.36719	-18	0.171875	-18	-0.228027	-18	-0.13208	-18	0.257813	-18	0.444519
-18	1.23438	-18.1	1.35706	-17.9	0.155518	-17.9	-0.238281	-17.9	-0.133545	-17.9	0.259399	-17.9	0.4375
-17.9	1.22577	-18	1.35236	-17.8	0.150879	-17.8	-0.235107	-17.8	-0.13208	-17.8	0.257813	-17.8	0.4422
-17.8	1.22266	-17.9	1.34454	-17.7	0.151611	-17.7	-0.223389	-17.7	-0.141357	-17.7	0.267212	-17.7	0.4328
-17.7	1.19922	-17.8	1.32971	-17.6	0.148438	-17.6	-0.223389	-17.6	-0.143799	-17.6	0.257813	-17.6	0.445313
-17.6	1.19141	-17.7	1.30859	-17.5	0.152344	-17.5	-0.21875	-17.5	-0.136719	-17.5	0.267212	-17.5	0.4422
-17.5	1.18439	-17.6	1.29846	-17.4	0.13916	-17.4	-0.21167	-17.4	-0.133545	-17.4	0.282043	-17.4	0.4375
-17.4	1.18359	-17.5	1.28595	-17.3	0.140625	-17.3	-0.216309	-17.3	-0.119507	-17.3	0.286743	-17.3	0.4422
-17.3	1.17188	-17.4	1.26953	-17.2	0.135986	-17.2	-0.21875	-17.2	-0.110107	-17.2	0.296875	-17.2	0.4328
-17.2	1.16718	-17.3	1.2594	-17.1	0.13916	-17.1	-0.223389	-17.1	-0.10083	-17.1	0.298462	-17.1	0.434387
-17.1	1.15234	-17.2	1.25	-17	0.128906	-17	-0.207031	-17	-0.0976563	-17	0.296875	-17	0.4375
-17	1.14063	-17.1	1.23987	-16.9	0.13208	-16.9	-0.208496	-16.9	-0.0944824	-16.9	0.303162	-16.9	0.445313
-16.9	1.13361	-17	1.22815	-16.8	0.121094	-16.8	-0.203857	-16.8	-0.0930176	-16.8	0.320313	-16.8	0.453918
-16.8	1.13281	-16.9	1.21875	-16.7	0.119629	-16.7	-0.207031	-16.7	-0.0812988	-16.7	0.310181	-16.7	0.449219
-16.7	1.12421	-16.8	1.20392	-16.6	0.109375	-16.6	-0.203857	-16.6	-0.0710449	-16.6	0.308594	-16.6	0.46405
-16.6	1.12109	-16.7	1.1922	-16.5	0.100098	-16.5	-0.188965	-16.5	-0.0734863	-16.5	0.317993	-16.5	0.464844
-16.5	1.10938	-16.6	1.17737	-16.4	0.0930176	-16.4	-0.1875	-16.4	-0.0710449	-16.4	0.3172	-16.4	0.461731
-16.4	1.10156	-16.5	1.17267	-16.3	0.0898438	-16.3	-0.1875	-16.3	-0.0617676	-16.3	0.320313	-16.3	0.464844
-16.3	1.08984	-16.4	1.16016	-16.2	0.0930176	-16.2	-0.177246	-16.2	-0.0585938	-16.2	0.317993	-16.2	0.47345
-16.2	1.08673	-16.3	1.14612	-16.1	0.0852051	-16.1	-0.1875	-16.1	-0.0437012	-16.1	0.316406	-16.1	0.46875
-16.1	1.09375	-16.2	1.13831	-16	0.0734863	-16	-0.172607	-16	-0.0296631	-16	0.313293	-16	0.471863
-16	1.08673	-16.1	1.12891	-15.9	0.0703125	-15.9	-0.157715	-15.9	-0.015625	-15.9	0.306274	-15.9	0.47345
-15.9	1.09686	-16	1.11096	-15.8	0.0734863	-15.8	-0.160156	-15.8	-7.32422E-4	-15.8	0.305481	-15.8	0.476563
-15.8	1.08984	-15.9	1.10236	-15.7	0.0688477	-15.7	-0.157715	-15.7	0	-15.7	0.310181	-15.7	0.488281
-15.7	1.08203	-15.8	1.09766	-15.6	0.0750732	-15.6	-0.143677	-15.6	0.00463867	-15.6	0.308594	-15.6	0.481262
-15.6	1.07031	-15.7	1.09064	-15.5	0.0688477	-15.5	-0.145996	-15.5	0	-15.5	0.317993	-15.5	0.471863
-15.5	1.0672	-15.6	1.08051	-15.4	0.0703125	-15.4	-0.136719	-15.4	0.0117188	-15.4	0.320313	-15.4	0.47345
-15.4	1.0625	-15.5	1.07813	-15.3	0.0610352	-15.3	-0.126465	-15.3	0.0117188	-15.3	0.310181	-15.3	0.46875
-15.3	1.0578	-15.4	1.08282	-15.2	0.0617676	-15.2	-0.128906	-15.2	0	-15.2	0.308594	-15.2	0.46875
-15.2	1.05078	-15.3	1.06799	-15.1	0.0703125	-15.1	-0.121826	-15.1	-0.00317383	-15.1	0.298462	-15.1	0.464844
-15.1	1.03906	-15.2	1.06329	-15	0.0703125	-15	-0.121826	-15	0.00708008	-15	0.305481	-15	0.46875
-15	1.03595	-15.1	1.06018	-14.9	0.0656738	-14.9	-0.117188	-14.9	0.00463867	-14.9	0.296875	-14.9	0.464844
-14.9	1.03125	-15	1.05548	-14.8	0.0688477	-14.8	-0.106934	-14.8	0.0195313	-14.8	0.298462	-14.8	0.47345
-14.8	1.02344	-14.9	1.05859	-14.7	0.0734863	-14.7	-0.0976563	-14.7	0.0234375	-14.7	0.298462	-14.7	0.46875
-14.7	1.01483	-14.8	1.04846	-14.6	0.078125	-14.6	-0.0827637	-14.6	0.0195313	-14.6	0.289063	-14.6	0.47345
-14.6	1.01953	-14.7	1.03204	-14.5	0.0852051	-14.5	-0.0756836	-14.5	0.0234375	-14.5	0.293762	-14.5	0.46405
-14.5	1.02423	-14.6	1.03204	-14.4	0.0852051	-14.4	-0.078125	-14.4	0.0163574	-14.4	0.278931	-14.4	0.476563
-14.4	1.01172	-14.5	1.04065	-14.3	0.0852051	-14.3	-0.0678711	-14.3	0.0187988	-14.3	0.274231	-14.3	0.47345
-14.3	1.00391	-14.4	1.03595	-14.2	0.0898438	-14.2	-0.0703125	-14.2	0.0163574	-14.2	0.269531	-14.2	0.46875
-14.2	0.992188	-14.3	1.02734	-14.1	0.104736	-14.1	-0.0664063	-14.1	0.0234375	-14.1	0.267212	-14.1	0.452332
-14.1	0.972656	-14.2	1.01721	-14	0.111816	-14	-0.0561523	-14	0.0187988	-14	0.257813	-14	0.457031
-14	0.972656	-14.1	1.01953	-13.9	0.121094	-13.9	-0.0554199	-13.9	0.0280762	-13.9	0.259399	-13.9	0.461731
-13.9	0.953125	-14	1.01721	-13.8	0.135986	-13.8	-0.046875	-13.8	0.0351563	-13.8	0.2547	-13.8	0.461731
-13.8	0.941406	-13.9	1.02423	-13.7	0.140625	-13.7	-0.0483398	-13.7	0.0280762	-13.7	0.247681	-13.7	0.46405
-13.7	0.944519	-13.8	1.02112	-13.6	0.150879	-13.6	-0.0390625	-13.6	0.0266113	-13.6	0.25	-13.6	0.461731
-13.6	0.929688	-13.7	1.01953	-13.5	0.151611	-13.5	-0.0319824	-13.5	0.03125	-13.5	0.247681	-13.5	0.46405
-13.5	0.926575	-13.6	1.0094	-13.4	0.16333	-13.4	-0.015625	-13.4	0.0280762	-13.4	0.25	-13.4	0.461731
-13.4	0.933594	-13.5	1	-13.3	0.164917	-13.3	-0.0170898	-13.3	0.0383301	-13.3	0.259399	-13.3	0.46405
-13.3	0.921875	-13.4	0.997681	-13.2	0.17041	-13.2	-0.0124512	-13.2	0.03125	-13.2	0.2547	-13.2	0.461731
-13.2	0.897644	-13.3	0.992981	-13.1	0.160156	-13.1	-0.0195313	-13.1	0.0163574	-13.1	0.25	-13.1	0.452332
-13.1	0.890625	-13.2	1.00159	-13	0.17041	-13	-0.0170898	-13	0.0187988	-13	0.242981	-13	0.466431
-13	0.883606	-13.1	0.988281	-12.9	0.167969	-12.9	-0.00463867	-12.9	0.0117188	-12.9	0.228149	-12.9	0.46405
-12.9	0.882813	-13	0.978149	-12.8	0.175049	-12.8	-5.00222E-12	-12.8	-0.00317383	-12.8	0.215637	-12.8	0.461731
-12.8	0.871094	-12.9	0.96875	-12.7	0.178223	-12.7	0.00708008	-12.7	-0.00463867	-12.7	0.215637	-12.7	0.460938
-12.7	0.871094	-12.8	0.958618	-12.6	0.179688	-12.6	0.00708008	-12.6	-0.00317383	-12.6	0.207031	-12.6	0.452332
-12.6	0.863281	-12.7	0.949219	-12.5	0.179688	-12.5	0.0187988	-12.5	-0.00317383	-12.5	0.196899	-12.5	0.453918
-12.5	0.856262	-12.6	0.958618	-12.4	0.182129	-12.4	0.0117188	-12.4	-7.32422E-4	-12.4	0.196106	-12.4	0.4375
-12.4	0.851563	-12.5	0.953918	-12.3	0.175049	-12.3	0.0141602	-12.3	-0.015625	-12.3	0.189087	-12.3	0.4328
-12.3	0.84375	-12.4	0.953918	-12.2	0.171875	-12.2	0.00708008	-12.2	-0.0227051	-12.2	0.179688	-12.2	0.417969
-12.2	0.824219	-12.3	0.939087	-12.1	0.182129	-12.1	0.0117188	-12.1	-0.0351563	-12.1	0.189087	-12.1	0.41095
-12.1	0.815613	-12.2	0.926575	-12	0.167969	-12	0.0219727	-12	-0.0437012	-12	0.1875	-12	0.414856
-12	0.8125	-12.1	0.910156	-11.9	0.17041	-11.9	0.0187988	-11.9	-0.0422363	-11.9	0.189087	-11.9	0.413269
-11.9	0.792969	-12	0.895325	-11.8	0.179688	-11.8	0.0117188	-11.8	-0.0437012	-11.8	0.196106	-11.8	0.414856
-11.8	0.769531	-11.9	0.891418	-11.7	0.178223	-11.7	0.0148926	-11.7	-0.0344238	-11.7	0.1875	-11.7	0.40155
-11.7	0.75	-11.8	0.895325	-11.6	0.179688	-11.6	0.0187988	-11.6	-0.0305176	-11.6	0.189087	-11.6	0.398438
-11.6	0.730469	-11.7	0.883606	-11.5	0.186768	-11.5	0.0117188	-11.5	-0.0319824	-11.5	0.1875	-11.5	0.383606
-11.5	0.722656	-11.6	0.868774	-11.4	0.179688	-11.4	0.0141602	-11.4	-0.0273438	-11.4	0.196899	-11.4	0.382019
-11.4	0.715637	-11.5	0.878906	-11.3	0.189941	-11.3	0.0234375	-11.3	-0.0305176	-11.3	0.196106	-11.3	0.371887
-11.3	0.717957	-11.4	0.868774	-11.2	0.175049	-11.2	0.0219727	-11.2	-0.0202637	-11.2	0.189087	-11.2	0.371094
-11.2	0.707825	-11.3	0.878906	-11.1	0.179688	-11.1	0.0266113	-11.1	-0.0227051	-11.1	0.1875	-11.1	0.362488
-11.1	0.686707	-11.2	0.868774	-11	0.178955	-11	0.03125	-11	-0.0124512	-11	0.196899	-11	0.355469
-11	0.679688	-11.1	0.868774	-10.9	0.182129	-10.9	0.0415039	-10.9	-0.0227051	-10.9	0.199219	-10.9	0.352356
-10.9	0.676575	-11	0.859375	-10.8	0.179688	-10.8	0.0429688	-10.8	-0.015625	-10.8	0.196899	-10.8	0.347656
-10.8	0.671875	-10.9	0.857056	-10.7	0.182861	-10.7	0.0532227	-10.7	-0.0241699	-10.7	0.196106	-10.7	0.339844
-10.7	0.664063	-10.8	0.859375	-10.6	0.191406	-10.6	0.0507813	-10.6	-0.0227051	-10.6	0.199219	-10.6	0.332825
-10.6	0.640625	-10.7	0.849243	-10.5	0.186768	-10.5	0.0625	-10.5	-0.0227051	-10.5	0.1922	-10.5	0.320313
-10.5	0.635925	-10.6	0.844543	-10.4	0.182129	-10.4	0.0649414	-10.4	-0.015625	-10.4	0.189087	-10.4	0.311707
-10.4	0.625793	-10.5	0.828125	-10.3	0.19458	-10.3	0.0742188	-10.3	-0.0202637	-10.3	0.184387	-10.3	0.308594
-10.3	0.613281	-10.4	0.817993	-10.2	0.199219	-10.2	0.0727539	-10.2	-0.0195313	-10.2	0.189087	-10.2	0.301575
-10.2	0.601563	-10.3	0.810181	-10.1	0.20166	-10.1	0.0703125	-10.1	-0.0148926	-10.1	0.179688	-10.1	0.303894
-10.1	0.596863	-10.2	0.800781	-10	0.199219	-10	0.0695801	-10	-0.0124512	-10	0.184387	-10	0.296875
-10	0.589844	-10.1	0.793762	-9.9	0.206299	-9.9	0.0727539	-9.9	-0.0227051	-9.9	0.177368	-9.9	0.293762
-9.9	0.578125	-10	0.778931	-9.8	0.202393	-9.8	0.0820313	-9.8	-0.0195313	-9.8	0.179688	-9.8	0.289063
-9.8	0.570313	-9.9	0.78125	-9.7	0.206299	-9.7	0.09375	-9.7	-0.0195313	-9.7	0.189087	-9.7	0.284363
-9.7	0.558594	-9.8	0.767212	-9.6	0.19458	-9.6	0.0922852	-9.6	-0.00317383	-9.6	0.184387	-9.6	0.277344
-9.6	0.555481	-9.7	0.769531	-9.5	0.206299	-9.5	0.09375	-9.5	-7.32422E-4	-9.5	0.1922	-9.5	0.282043
-9.5	0.550781	-9.6	0.767212	-9.4	0.199219	-9.4	0.0922852	-9.4	-0.00317383	-9.4	0.196106	-9.4	0.272644
-9.4	0.542969	-9.5	0.757813	-9.3	0.20166	-9.3	0.101563	-9.3	-0.00463867	-9.3	0.1875	-9.3	0.265625
-9.3	0.53125	-9.4	0.747681	-9.2	0.199219	-9.2	0.104004	-9.2	-0.00317383	-9.2	0.189087	-9.2	0.262512
-9.2	0.53125	-9.3	0.747681	-9.1	0.186768	-9.1	0.113281	-9.1	0.00854492	-9.1	0.189087	-9.1	0.2547
-9.1	0.523438	-9.2	0.730469	-9	0.19458	-9	0.120361	-9	0.00708008	-9	0.1875	-9	0.253113
-9	0.511719	-9.1	0.72345	-8.9	0.197754	-8.9	0.111816	-8.9	0.0117188	-8.9	0.189087	-8.9	0.25
-8.9	0.5047	-9	0.708618	-8.8	0.199219	-8.8	0.121094	-8.8	0.0234375	-8.8	0.1875	-8.8	0.242981
-8.8	0.503906	-8.9	0.699219	-8.7	0.210938	-8.7	0.116455	-8.7	0.0195313	-8.7	0.189087	-8.7	0.241394
-8.7	0.492188	-8.8	0.681274	-8.6	0.221191	-8.6	0.113281	-8.6	0.03125	-8.6	0.1875	-8.6	0.242981
-8.6	0.484375	-8.7	0.660156	-8.5	0.22583	-8.5	0.123535	-8.5	0.0163574	-8.5	0.184387	-8.5	0.246094
-8.5	0.487488	-8.6	0.650024	-8.4	0.21875	-8.4	0.116455	-8.4	0.0187988	-8.4	0.177368	-8.4	0.257813
-8.4	0.480469	-8.5	0.640625	-8.3	0.221191	-8.3	0.113281	-8.3	0.0163574	-8.3	0.179688	-8.3	0.262512
-8.3	0.472656	-8.4	0.626587	-8.2	0.21875	-8.2	0.108643	-8.2	0.0280762	-8.2	0.177368	-8.2	0.253113
-8.2	0.477356	-8.3	0.614075	-8.1	0.229004	-8.1	0.104004	-8.1	0.0266113	-8.1	0.184387	-8.1	0.246094
-8.1	0.472656	-8.2	0.594543	-8	0.230469	-8	0.0969238	-8	0.0234375	-8	0.177368	-8	0.242981
-8	0.460938	-8.1	0.566406	-7.9	0.242188	-7.9	0.0891113	-7.9	0.0163574	-7.9	0.184387	-7.9	0.241394
-7.9	0.460938	-8	0.548462	-7.8	0.240723	-7.8	0.0820313	-7.8	0.0234375	-7.8	0.184387	-7.8	0.242981
-7.8	0.453125	-7.9	0.524231	-7.7	0.25	-7.7	0.0891113	-7.7	0.0266113	-7.7	0.172668	-7.7	0.238281
-7.7	0.456238	-7.8	0.497681	-7.6	0.25708	-7.6	0.0969238	-7.6	0.0358887	-7.6	0.176575	-7.6	0.233582
-7.6	0.449219	-7.7	0.488281	-7.5	0.252441	-7.5	0.0969238	-7.5	0.0234375	-7.5	0.167969	-7.5	0.231262
-7.5	0.446106	-7.6	0.485168	-7.4	0.25	-7.4	0.0922852	-7.4	0.0187988	-7.4	0.157837	-7.4	0.230469
-7.4	0.441406	-7.5	0.458618	-7.3	0.245361	-7.3	0.101563	-7.3	0.0163574	-7.3	0.153137	-7.3	0.21875
-7.3	0.433594	-7.4	0.449219	-7.2	0.233643	-7.2	0.104736	-7.2	0.0234375	-7.2	0.145325	-7.2	0.211731
-7.2	0.433594	-7.3	0.439087	-7.1	0.245361	-7.1	0.108643	-7.1	0.0117188	-7.1	0.138306	-7.1	0.21405
-7.1	0.421875	-7.2	0.4375	-7	0.237549	-7	0.113281	-7	0.00708008	-7	0.140625	-7	0.207031
-7	0.421875	-7.1	0.439087	-6.9	0.229004	-6.9	0.111816	-6.9	0.0163574	-6.9	0.138306	-6.9	0.211731
-6.9	0.405457	-7	0.431274	-6.8	0.21875	-6.8	0.113281	-6.8	0.0280762	-6.8	0.125793	-6.8	0.21405
-6.8	0.410156	-6.9	0.434387	-6.7	0.22583	-6.7	0.131348	-6.7	0.0187988	-6.7	0.128906	-6.7	0.207031
-6.7	0.410156	-6.8	0.429688	-6.6	0.214111	-6.6	0.132813	-6.6	0.0117188	-6.6	0.126587	-6.6	0.203918
-6.6	0.398438	-6.7	0.419556	-6.5	0.230469	-6.5	0.132813	-6.5	0.00390625	-6.5	0.125793	-6.5	0.191406
-6.5	0.395325	-6.6	0.410156	-6.4	0.229004	-6.4	0.135254	-6.4	-0.00317383	-6.4	0.117188	-6.4	0.1828
-6.4	0.390625	-6.5	0.407837	-6.3	0.22583	-6.3	0.128174	-6.3	-7.32422E-4	-6.3	0.118774	-6.3	0.1922
-6.3	0.382813	-6.4	0.395325	-6.2	0.214111	-6.2	0.132813	-6.2	-0.00317383	-6.2	0.117188	-6.2	0.195313
-6.2	0.382813	-6.3	0.375793	-6.1	0.21875	-6.1	0.120361	-6.1	-0.0078125	-6.1	0.102356	-6.1	0.199219
-6.1	0.371094	-6.2	0.359375	-6	0.206299	-6	0.111816	-6	-0.015625	-6	0.107056	-6	0.199219
-6	0.371094	-6.1	0.349243	-5.9	0.198486	-5.9	0.108643	-5.9	-0.0195313	-5.9	0.114075	-5.9	0.184387
-5.9	0.367981	-6	0.341431	-5.8	0.189941	-5.8	0.09375	-5.8	-0.015625	-5.8	0.118774	-5.8	0.1828
-5.8	0.366394	-5.9	0.328125	-5.7	0.182861	-5.7	0.0891113	-5.7	-0.0227051	-5.7	0.128906	-5.7	0.184387
-5.7	0.363281	-5.8	0.317993	-5.6	0.179688	-5.6	0.0922852	-5.6	-0.0319824	-5.6	0.126587	-5.6	0.1828
-5.6	0.351563	-5.7	0.308594	-5.5	0.175049	-5.5	0.0820313	-5.5	-0.0305176	-5.5	0.128906	-5.5	0.180481
-5.5	0.351563	-5.6	0.293762	-5.4	0.17041	-5.4	0.0922852	-5.4	-0.0351563	-5.4	0.126587	-5.4	0.1828
-5.4	0.332031	-5.5	0.278931	-5.3	0.167969	-5.3	0.0852051	-5.3	-0.0515137	-5.3	0.125793	-5.3	0.167969
-5.3	0.332031	-5.4	0.274231	-5.2	0.155518	-5.2	0.0820313	-5.2	-0.0585938	-5.2	0.121887	-5.2	0.16095
-5.2	0.320313	-5.3	0.2547	-5.1	0.147705	-5.1	0.0773926	-5.1	-0.0617676	-5.1	0.125793	-5.1	0.160156
-5.1	0.3125	-5.2	0.238281	-5	0.140625	-5	0.0742188	-5	-0.0742188	-5	0.130493	-5	0.148438
-5	0.300781	-5.1	0.239868	-4.9	0.135986	-4.9	0.0695801	-4.9	-0.0859375	-4.9	0.128906	-4.9	0.136719
-4.9	0.300781	-5	0.226563	-4.8	0.131348	-4.8	0.0649414	-4.8	-0.0976563	-4.8	0.125793	-4.8	0.136719
-4.8	0.292969	-4.9	0.228149	-4.7	0.124268	-4.7	0.0578613	-4.7	-0.102295	-4.7	0.118774	-4.7	0.128906
-4.7	0.28125	-4.8	0.22345	-4.6	0.121094	-4.6	0.0507813	-4.6	-0.109375	-4.6	0.128906	-4.6	0.114075
-4.6	0.269531	-4.7	0.228149	-4.5	0.119629	-4.5	0.0532227	-4.5	-0.112549	-4.5	0.118774	-4.5	0.109375
-4.5	0.261719	-4.6	0.230469	-4.4	0.121094	-4.4	0.0507813	-4.4	-0.117188	-4.4	0.117188	-4.4	0.112488
-4.4	0.2547	-4.5	0.220337	-4.3	0.119629	-4.3	0.0610352	-4.3	-0.136719	-4.3	0.126587	-4.3	0.109375
-4.3	0.253906	-4.4	0.211731	-4.2	0.104736	-4.2	0.0625	-4.2	-0.133545	-4.2	0.114075	-4.2	0.0976563
-4.2	0.242188	-4.3	0.22345	-4.1	0.0976563	-4.1	0.0656738	-4.1	-0.13208	-4.1	0.118774	-4.1	0.0898438
-4.1	0.237488	-4.2	0.228149	-4	0.104736	-4	0.0820313	-4	-0.13208	-4	0.109375	-4	0.0828247
-4	0.230469	-4.1	0.21875	-3.9	0.109375	-3.9	0.0812988	-3.9	-0.133545	-3.9	0.102356	-3.9	0.078125
-3.9	0.222656	-4	0.220337	-3.8	0.108643	-3.8	0.0844727	-3.8	-0.124268	-3.8	0.0992432	-3.8	0.0703125
-3.8	0.210938	-3.9	0.211731	-3.7	0.0922852	-3.7	0.0852051	-3.7	-0.121826	-3.7	0.0976563	-3.7	0.0617065
-3.7	0.203918	-3.8	0.21875	-3.6	0.0898438	-3.6	0.09375	-3.6	-0.121094	-3.6	0.0992432	-3.6	0.0515747
-3.6	0.203125	-3.7	0.196899	-3.5	0.0805664	-3.5	0.0969238	-3.5	-0.112549	-3.5	0.0976563	-3.5	0.0421753
-3.5	0.191406	-3.6	0.203918	-3.4	0.0703125	-3.4	0.104736	-3.4	-0.114014	-3.4	0.0828247	-3.4	0.0351563
-3.4	0.186707	-3.5	0.208618	-3.3	0.0656738	-3.3	0.108643	-3.3	-0.104736	-3.3	0.0797119	-3.3	0.0320435
-3.3	0.179688	-3.4	0.199219	-3.2	0.0610352	-3.2	0.101563	-3.2	-0.0976563	-3.2	0.0664063	-3.2	0.0437622
-3.2	0.179688	-3.3	0.189087	-3.1	0.0585938	-3.1	0.108643	-3.1	-0.0930176	-3.1	0.0679932	-3.1	0.0421753
-3.1	0.160156	-3.2	0.184387	-3	0.0578613	-3	0.10083	-3	-0.0827637	-3	0.0601807	-3	0.0437622
-3	0.157043	-3.1	0.1875	-2.9	0.0539551	-2.9	0.0969238	-2.9	-0.0812988	-2.9	0.0585938	-2.9	0.0421753
-2.9	0.152344	-3	0.177368	-2.8	0.0585938	-2.8	0.0922852	-2.8	-0.0827637	-2.8	0.0484619	-2.8	0.0437622
-2.8	0.140625	-2.9	0.169556	-2.7	0.0656738	-2.7	0.0852051	-2.7	-0.0734863	-2.7	0.0390625	-2.7	0.0390625
-2.7	0.121094	-2.8	0.160156	-2.6	0.0610352	-2.6	0.0820313	-2.6	-0.078125	-2.6	0.024231	-2.6	0.0273438
-2.6	0.116394	-2.7	0.157837	-2.5	0.0507813	-2.5	0.0820313	-2.5	-0.0617676	-2.5	0.0289307	-2.5	0.0304565
-2.5	0.109375	-2.6	0.160156	-2.4	0.0493164	-2.4	0.0844727	-2.4	-0.0632324	-2.4	0.0195313	-2.4	0.0320435
-2.4	0.114075	-2.5	0.16095	-2.3	0.0390625	-2.3	0.0742188	-2.3	-0.0617676	-2.3	0.00939941	-2.3	0.024231
-2.3	0.117981	-2.4	0.169556	-2.2	0.03125	-2.2	0.0727539	-2.2	-0.0585938	-2.2	-0.00390625	-2.2	0.0343628
-2.2	0.125	-2.3	0.164856	-2.1	0.0297852	-2.1	0.0656738	-2.1	-0.0515137	-2.1	-0.0140381	-2.1	0.024231
-2.1	0.113281	-2.2	0.16095	-2	0.0195313	-2	0.0625	-2	-0.0539551	-2	-0.0101318	-2	0.022644
-2	0.104675	-2.1	0.169556	-1.9	0.0102539	-1.9	0.0500488	-1.9	-0.0390625	-1.9	-0.0148315	-1.9	0.0125122
-1.9	0.101563	-2	0.160156	-1.8	0.0195313	-1.8	0.0532227	-1.8	-0.0344238	-1.8	-0.00701904	-1.8	0.0078125
-1.8	0.101563	-1.9	0.150024	-1.7	0.0148926	-1.7	0.0507813	-1.7	-0.0319824	-1.7	-0.0148315	-1.7	0.00311279
-1.7	0.086731	-1.8	0.137512	-1.6	0.0117188	-1.6	0.0415039	-1.6	-0.0227051	-1.6	-0.0234375	-1.6	7.93457E-4
-1.6	0.0968628	-1.7	0.128906	-1.5	0.00244141	-1.5	0.03125	-1.5	-0.0319824	-1.5	-0.0218506	-1.5	0.00469971
-1.5	0.101563	-1.6	0.118774	-1.4	-0.00463867	-1.4	0.0234375	-1.4	-0.0227051	-1.4	-0.0265503	-1.4	0.00311279
-1.4	0.0898438	-1.5	0.109375	-1.3	-0.0163574	-1.3	0.0336914	-1.3	-0.0078125	-1.3	-0.038269	-1.3	0.0078125
-1.3	0.0703125	-1.4	0.0992432	-1.2	-0.0163574	-1.2	0.03125	-1.2	-0.0078125	-1.2	-0.0296631	-1.2	-0.00701904
-1.2	0.0625	-1.3	0.102356	-1.1	-0.0117188	-1.1	0.0187988	-1.1	-0.00317383	-1.1	-0.03125	-1.1	0
-1.1	0.0507813	-1.2	0.0992432	-1	-0.00927734	-1	0.00708008	-1	-0.0124512	-1	-0.0218506	-1	-0.00860596
-1	0.0507813	-1.1	0.0898438	-0.900002	-0.00695801	-0.900002	0.0102539	-0.900002	-0.00317383	-0.900002	-0.0195313	-0.900002	-0.0117188
-0.899998	0.0437622	-1	0.0875244	-0.799999	0.00244141	-0.799999	0.0117188	-0.799999	0.00708008	-0.799999	-0.0265503	-0.799999	-0.00701904
-0.799999	0.0429688	-0.900002	0.078125	-0.700001	-5.00222E-12	-0.700001	0.0117188	-0.700001	0.00854492	-0.700001	-0.0304565	-0.700001	-0.0117188
-0.700001	0.0234375	-0.800003	0.0797119	-0.600002	-0.00146484	-0.600002	0.0141602	-0.600002	0.00390625	-0.600002	-0.00933838	-0.600002	-0.0164185
-0.599998	0.0234375	-0.700001	0.0585938	-0.5	-5.00222E-12	-0.5	0.00708008	-0.5	0.00708008	-0.5	-2.27374E-13	-0.5	-0.0187378
-0.5	0.0195313	-0.600002	0.0484619	-0.400002	-0.0124512	-0.400002	0.00708008	-0.400002	-0.00317383	-0.400002	0.00939941	-0.400002	-0.00860596
-0.399998	0.0234375	-0.5	0.0437622	-0.299999	-0.0163574	-0.299999	0.00390625	-0.299999	-0.00317383	-0.299999	0.0078125	-0.299999	-0.00701904
-0.299999	0.0148315	-0.400002	0.0320435	-0.200001	-0.00146484	-0.200001	-0.00463867	-0.200001	-7.32422E-4	-0.200001	0.00939941	-0.200001	-0.00701904
-0.200001	0.0117188	-0.300003	0.024231	-0.100002	-5.00222E-12	-0.100002	0.00244141	-0.100002	0.00390625	-0.100002	0.00469971	-0.100002	0.00311279
-0.0999985	0.00469971	-0.200001	0.00469971	0	-5.00222E-12	0	-5.00222E-12	0	0	0	-2.27374E-13	0	0
0	0	-0.100002	-0.00231934	0.0999985	0.00708008	0.0999985	0.0117188	0.0999985	0.00390625	0.0999985	7.93457E-4	0.0999985	-0.00701904
0.100002	-0.0078125	0	-2.27374E-13	0.200001	0.00708008	0.200001	0.00244141	0.200001	-0.0109863	0.200001	7.93457E-4	0.200001	-0.00860596
0.200001	-0.0078125	0.0999985	-0.0148315	0.299999	0.00317383	0.299999	0.00390625	0.299999	-0.015625	0.299999	-0.00231934	0.299999	-0.0117188
0.299999	-0.0195313	0.199997	-0.0218506	0.399998	0.0102539	0.399998	0.00708008	0.399998	-0.0241699	0.399998	0.00939941	0.399998	-0.0187378
0.400002	-0.022644	0.299999	-0.0195313	0.5	0.00476074	0.5	0.0102539	0.5	-0.0227051	0.5	0.0195313	0.5	-0.0164185
0.5	-0.024231	0.399998	-0.0335693	0.599998	0.0219727	0.599998	0.0164795	0.599998	-0.0241699	0.599998	0.00939941	0.599998	-0.0234375
0.600002	-0.0195313	0.5	-0.0296631	0.700001	0.0195313	0.700001	0.0383301	0.700001	-0.0227051	0.700001	0.0078125	0.700001	-0.0187378
0.700001	-0.022644	0.599998	-0.0421753	0.799999	0.0219727	0.799999	0.0415039	0.799999	-0.0273438	0.799999	0.0172119	0.799999	-0.0281372
0.799999	-0.0273438	0.699997	-0.0507813	0.899998	0.0227051	0.899998	0.0507813	0.899998	-0.0351563	0.899998	0.024231	0.899998	-0.0187378
0.900002	-0.0390625	0.799999	-0.0609131	1	0.0227051	1	0.0578613	1	-0.0422363	1	0.0406494	1	-0.03125
1	-0.046875	0.899998	-0.0625	1.1	0.0390625	1.1	0.0625	1.1	-0.0515137	1.1	0.0390625	1.1	-0.0351563
1.1	-0.046875	1	-0.0609131	1.2	0.0539551	1.2	0.0727539	1.2	-0.0539551	1.2	0.0437622	1.2	-0.0265503
1.2	-0.055481	1.1	-0.0734253	1.3	0.0852051	1.3	0.0742188	1.3	-0.0546875	1.3	0.0484619	1.3	-0.03125
1.3	-0.053894	1.2	-0.0820313	1.4	0.0898438	1.4	0.0727539	1.4	-0.0742188	1.4	0.0585938	1.4	-0.0281372
1.4	-0.046875	1.3	-0.0968628	1.5	0.100098	1.5	0.0703125	1.5	-0.0827637	1.5	0.0679932	1.5	-0.0265503
1.5	-0.0585938	1.4	-0.0999756	1.6	0.0898438	1.6	0.0773926	1.6	-0.0859375	1.6	0.0585938	1.6	-0.03125
1.6	-0.055481	1.5	-0.113281	1.7	0.104736	1.7	0.0805664	1.7	-0.0930176	1.7	0.0679932	1.7	-0.0390625
1.7	-0.0585938	1.6	-0.123413	1.8	0.121094	1.8	0.0820313	1.8	-0.0944824	1.8	0.0632935	1.8	-0.0476685
1.8	-0.0656128	1.7	-0.135925	1.9	0.119629	1.9	0.0969238	1.9	-0.104736	1.9	0.0679932	1.9	-0.038269
1.9	-0.0585938	1.8	-0.139038	2	0.128906	2	0.104736	2	-0.105469	2	0.0703125	2	-0.0460815
2	-0.0664063	1.9	-0.140625	2.1	0.135986	2.1	0.101563	2.1	-0.114014	2.1	0.0601807	2.1	-0.0390625
2.1	-0.0734253	2	-0.139038	2.2	0.150879	2.2	0.108643	2.2	-0.107788	2.2	0.0585938	2.2	-0.055481
2.2	-0.0664063	2.1	-0.140625	2.3	0.148438	2.3	0.116455	2.3	-0.102295	2.3	0.0484619	2.3	-0.0460815
2.3	-0.078125	2.2	-0.150757	2.4	0.155518	2.4	0.132813	2.4	-0.10083	2.4	0.046875	2.4	-0.0507813
2.4	-0.0828247	2.3	-0.155457	2.5	0.160156	2.5	0.143066	2.5	-0.102295	2.5	0.0367432	2.5	-0.0476685
2.5	-0.0976563	2.4	-0.155457	2.6	0.16333	2.6	0.132813	2.6	-0.112549	2.6	0.0437622	2.6	-0.0460815
2.6	-0.104675	2.5	-0.160156	2.7	0.17041	2.7	0.147705	2.7	-0.109375	2.7	0.0484619	2.7	-0.0507813
2.7	-0.105469	2.6	-0.162476	2.8	0.182861	2.8	0.167236	2.8	-0.0898438	2.8	0.0437622	2.8	-0.0671997
2.8	-0.114075	2.7	-0.170288	2.9	0.199219	2.9	0.164063	2.9	-0.0930176	2.9	0.0632935	2.9	-0.069519
2.9	-0.109375	2.8	-0.160156	3	0.214111	3	0.174316	3	-0.0905762	3	0.0601807	3	-0.0671997
3	-0.128906	2.9	-0.170288	3.1	0.21875	3.1	0.171875	3.1	-0.0930176	3.1	0.0585938	3.1	-0.0742188
3.1	-0.124207	3	-0.171875	3.2	0.221191	3.2	0.182129	3.2	-0.0944824	3.2	0.0437622	3.2	-0.069519
3.2	-0.136719	3.1	-0.186707	3.3	0.230469	3.3	0.183594	3.3	-0.0898438	3.3	0.0406494	3.3	-0.0656128
3.3	-0.148438	3.2	-0.189819	3.4	0.229004	3.4	0.193848	3.4	-0.0930176	3.4	0.0390625	3.4	-0.0671997
3.4	-0.148438	3.3	-0.206238	3.5	0.230469	3.5	0.191406	3.5	-0.078125	3.5	0.0367432	3.5	-0.0656128
3.5	-0.15625	3.4	-0.222656	3.6	0.233643	3.6	0.198486	3.6	-0.0734863	3.6	0.024231	3.6	-0.0671997
3.6	-0.164856	3.5	-0.221069	3.7	0.242188	3.7	0.203125	3.7	-0.0664063	3.7	0.024231	3.7	-0.0773315
3.7	-0.155457	3.6	-0.221069	3.8	0.240723	3.8	0.213379	3.8	-0.0632324	3.8	0.024231	3.8	-0.086731
3.8	-0.15625	3.7	-0.21875	3.9	0.25	3.9	0.210938	3.9	-0.0585938	3.9	0.0125122	3.9	-0.0890503
3.9	-0.15625	3.8	-0.228882	4	0.245361	4	0.213379	4	-0.0491943	4	0.0211182	4	-0.086731
4	-0.167969	3.9	-0.230469	4.1	0.253174	4.1	0.218018	4.1	-0.0437012	4.1	0.024231	4.1	-0.0890503
4.1	-0.179688	4	-0.2453	4.2	0.268066	4.2	0.210938	4.2	-0.0422363	4.2	0.0273438	4.2	-0.0820313
4.2	-0.176575	4.1	-0.260132	4.3	0.269531	4.3	0.218018	4.3	-0.0273438	4.3	0.0289307	4.3	-0.0820313
4.3	-0.174988	4.2	-0.28125	4.4	0.276611	4.4	0.221191	4.4	-0.00317383	4.4	0.024231	4.4	-0.0703125
4.4	-0.167969	4.3	-0.291382	4.5	0.28125	4.5	0.222656	4.5	-7.32422E-4	4.5	0.024231	4.5	-0.0773315
4.5	-0.167969	4.4	-0.303894	4.6	0.279785	4.6	0.229736	4.6	-0.0078125	4.6	0.0289307	4.6	-0.0703125
4.6	-0.174988	4.5	-0.3125	4.7	0.292236	4.7	0.222656	4.7	-0.00317383	4.7	0.0273438	4.7	-0.0789185
4.7	-0.172668	4.6	-0.330444	4.8	0.284424	4.8	0.221191	4.8	0.00390625	4.8	0.0320435	4.8	-0.0773315
4.8	-0.179688	4.7	-0.330444	4.9	0.28125	4.9	0.206299	4.9	-0.00463867	4.9	0.0289307	4.9	-0.0898438
4.9	-0.202332	4.8	-0.339844	5	0.271973	5	0.191406	5	-0.0148926	5	0.0273438	5	-0.0984497
5	-0.226563	4.9	-0.349976	5.1	0.257813	5.1	0.186768	5.1	-0.0195313	5.1	0.0172119	5.1	-0.0968628
5.1	-0.242981	5	-0.351563	5.2	0.248535	5.2	0.178955	5.2	-0.0195313	5.2	7.93457E-4	5.2	-0.104675
5.2	-0.257813	5.1	-0.381226	5.3	0.238281	5.3	0.162598	5.3	-0.0148926	5.3	-0.00231934	5.3	-0.125793
5.3	-0.277344	5.2	-0.413269	5.4	0.21875	5.4	0.152344	5.4	-0.0078125	5.4	-0.0117188	5.4	-0.147644
5.4	-0.303894	5.3	-0.441406	5.5	0.221191	5.5	0.155518	5.5	0	5.5	-0.0187378	5.5	-0.157043
5.5	-0.316406	5.4	-0.471069	5.6	0.19458	5.6	0.147705	5.6	-0.00317383	5.6	-0.0218506	5.6	-0.167175
5.6	-0.332825	5.5	-0.492188	5.7	0.160156	5.7	0.132813	5.7	-7.32422E-4	5.7	-0.00701904	5.7	-0.188293
5.7	-0.346863	5.6	-0.521851	5.8	0.150879	5.8	0.123535	5.8	0	5.8	-0.00231934	5.8	-0.198425
5.8	-0.347656	5.7	-0.549194	5.9	0.143799	5.9	0.113281	5.9	-0.00317383	5.9	-0.0117188	5.9	-0.227356
5.9	-0.364075	5.8	-0.582031	6	0.121094	6	0.104004	6	-0.0124512	6	-0.0101318	6	-0.253906
6	-0.371094	5.9	-0.604675	6.1	0.100098	6.1	0.101563	6.1	-0.0179443	6.1	-0.03125	6.1	-0.268738
6.1	-0.390625	6	-0.631226	6.2	0.0898438	6.2	0.0922852	6.2	-0.015625	6.2	-0.0335693	6.2	-0.27655
6.2	-0.405457	6.1	-0.660156	6.3	0.0805664	6.3	0.0820313	6.3	-0.0319824	6.3	-0.0507813	6.3	-0.28595
6.3	-0.429688	6.2	-0.689819	6.4	0.0585938	6.4	0.0742188	6.4	-0.0273438	6.4	-0.0656128	6.4	-0.3078
6.4	-0.457031	6.3	-0.706238	6.5	0.0390625	6.5	0.0532227	6.5	-0.0390625	6.5	-0.0968628	6.5	-0.325012
6.5	-0.471863	6.4	-0.709351	6.6	0.0102539	6.6	0.0507813	6.6	-0.0539551	6.6	-0.123413	6.6	-0.346863
6.6	-0.492981	6.5	-0.730469	6.7	-0.00463867	6.7	0.0336914	6.7	-0.0546875	6.7	-0.132813	6.7	-0.367981
6.7	-0.507813	6.6	-0.752319	6.8	-0.03125	6.8	0.0234375	6.8	-0.0632324	6.8	-0.142944	6.8	-0.378113
6.8	-0.514832	6.7	-0.772644	6.9	-0.0483398	6.9	0.0141602	6.9	-0.0852051	6.9	-0.150757	6.9	-0.402344
6.9	-0.546875	6.8	-0.800781	7	-0.0703125	7	-0.0195313	7	-0.102295	7	-0.171875	7	-0.426575
7	-0.578125	6.9	-0.827332	7.1	-0.0944824	7.1	-0.0397949	7.1	-0.136719	7.1	-0.189819	7.1	-0.448425
7.1	-0.628906	7	-0.849976	7.2	-0.11084	7.2	-0.0678711	7.2	-0.16333	7.2	-0.191406	7.2	-0.492188
7.2	-0.664856	7.1	-0.859375	7.3	-0.156982	7.3	-0.0898438	7.3	-0.1875	7.3	-0.221069	7.3	-0.535156
7.3	-0.655457	7.2	-0.873413	7.4	-0.199219	7.4	-0.105469	7.4	-0.210205	7.4	-0.261719	7.4	-0.5625
7.4	-0.65625	7.3	-0.905457	7.5	-0.227295	7.5	-0.138184	7.5	-0.231201	7.5	-0.310913	7.5	-0.596863
7.5	-0.664856	7.4	-0.924988	7.6	-0.238281	7.6	-0.15625	7.6	-0.253174	7.6	-0.342163	7.6	-0.617981
7.6	-0.660156	7.5	-0.944519	7.7	-0.259277	7.7	-0.168701	7.7	-0.27417	7.7	-0.351563	7.7	-0.647644
7.7	-0.674988	7.6	-0.951538	7.8	-0.27417	7.8	-0.188965	7.8	-0.284424	7.8	-0.361694	7.8	-0.668762
7.8	-0.679688	7.7	-0.971863	7.9	-0.300781	7.9	-0.1875	7.9	-0.285156	7.9	-0.371094	7.9	-0.671875
7.9	-0.738281	7.8	-0.992188	8	-0.310059	8	-0.192139	8	-0.293701	8	-0.381226	8	-0.686707
8	-0.784363	7.9	-0.990601	8.1	-0.320313	8.1	-0.188965	8.1	-0.303955	8.1	-0.405457	8.1	-0.706238
8.1	-0.847656	8	-0.992188	8.2	-0.32959	8.2	-0.192139	8.2	-0.304688	8.2	-0.424988	8.2	-0.71875
8.2	-0.917969	8.1	-0.990601	8.3	-0.332031	8.3	-0.199219	8.3	-0.313232	8.3	-0.441406	8.3	-0.727356
8.3	-0.97345	8.2	-0.9953	8.4	-0.320313	8.4	-0.1875	8.4	-0.320313	8.4	-0.451538	8.4	-0.725769
8.4	-1.01953	8.3	-1	8.5	-0.317871	8.5	-0.185059	8.5	-0.328125	8.5	-0.444519	8.5	-0.727356
8.5	-1.07343	8.4	-0.990601	8.6	-0.332764	8.6	-0.192139	8.6	-0.335205	8.6	-0.453125	8.6	-0.730469
8.6	-1.11407	8.5	-0.992188	8.7	-0.324951	8.7	-0.1875	8.7	-0.335938	8.7	-0.448425	8.7	-0.737488
8.7	-1.14063	8.6	-1.00232	8.8	-0.320313	8.8	-0.188965	8.8	-0.343018	8.8	-0.432007	8.8	-0.746887
8.8	-1.17499	8.7	-1.00702	8.9	-0.29834	8.9	-0.179688	8.9	-0.340576	8.9	-0.436707	8.9	-0.749207
8.9	-1.20392	8.8	-1.00702	9	-0.293701	9	-0.18042	9	-0.347656	9	-0.420288	9	-0.727356
9	-1.19141	8.9	-1.01013	9.1	-0.28125	9.1	-0.196777	9.1	-0.347656	9.1	-0.421875	9.1	-0.737488
9.1	-1.14374	9	-1.01172	9.2	-0.285889	9.2	-0.21875	9.2	-0.355469	9.2	-0.417175	9.2	-0.742188
9.2	-1.10938	9.1	-1.02185	9.3	-0.285889	9.3	-0.216309	9.3	-0.378906	9.3	-0.424988	9.3	-0.722656
9.3	-1.06329	9.2	-1.02655	9.4	-0.278076	9.4	-0.210938	9.4	-0.393799	9.4	-0.428894	9.4	-0.725769
9.4	-1.03436	9.3	-1.02966	9.5	-0.261719	9.5	-0.160889	9.5	-0.398438	9.5	-0.420288	9.5	-0.742188
9.5	-1.02264	9.4	-1.01953	9.6	-0.220215	9.6	-0.145264	9.6	-0.386719	9.6	-0.4328	9.6	-0.707825
9.6	-0.985168	9.5	-1.00232	9.7	-0.191406	9.7	-0.121826	9.7	-0.364014	9.7	-0.402344	9.7	-0.678894
9.7	-0.9375	9.6	-0.96875	9.8	-0.176514	9.8	-0.0898438	9.8	-0.339844	9.8	-0.358582	9.8	-0.635925
9.8	-0.913269	9.7	-0.939819	9.9	-0.128906	9.9	-0.0593262	9.9	-0.323486	9.9	-0.322632	9.9	-0.606262
9.9	-0.886719	9.8	-0.921875	10	-0.114014	10	-0.0366211	10	-0.304688	10	-0.296082	10	-0.59375
10	-0.864075	9.9	-0.920288	10.1	-0.11084	10.1	-0.0319824	10.1	-0.289063	10.1	-0.27655	10.1	-0.5625
10.1	-0.842957	10	-0.910156	10.2	-0.0703125	10.2	-0.0241699	10.2	-0.277344	10.2	-0.268738	10.2	-0.546082
10.2	-0.835938	10.1	-0.900757	10.3	-0.0476074	10.3	-0.0124512	10.3	-0.272705	10.3	-0.252319	10.3	-0.53595
10.3	-0.825012	10.2	-0.900757	10.4	-0.0078125	10.4	-5.00222E-12	10.4	-0.269531	10.4	-0.25	10.4	-0.521851
10.4	-0.815613	10.3	-0.90155	10.5	0.0180664	10.5	0.0461426	10.5	-0.262451	10.5	-0.260132	10.5	-0.496887
10.5	-0.796875	10.4	-0.921875	10.6	0.0266113	10.6	0.0773926	10.6	-0.253174	10.6	-0.271851	10.6	-0.475769
10.6	-0.793762	10.5	-0.912476	10.7	-5.00222E-12	10.7	0.114136	10.7	-0.233643	10.7	-0.253906	10.7	-0.450012
10.7	-0.784363	10.6	-0.902344	10.8	0.00317383	10.8	0.17041	10.8	-0.223389	10.8	-0.236694	10.8	-0.424194
10.8	-0.777344	10.7	-0.869507	10.9	0.015625	10.9	0.214111	10.9	-0.186768	10.9	-0.193726	10.9	-0.402344
10.9	-0.75	10.8	-0.859375	11	0.0539551	11	0.285156	11	-0.143799	11	-0.159363	11	-0.371094
11	-0.699219	10.9	-0.861694	11.1	0.0734863	11.1	0.328125	11.1	-0.125732	11.1	-0.103882	11.1	-0.363281
11.1	-0.667969	11	-0.873413	11.2	0.0617676	11.2	0.405518	11.2	-0.107788	11.2	-0.0890503	11.2	-0.34375
11.2	-0.643738	11.1	-0.859375	11.3	0.0507813	11.3	0.425049	11.3	-0.0358887	11.3	-0.0890503	11.3	-0.332031
11.3	-0.617188	11.2	-0.853882	11.4	0.0344238	11.4	0.460938	11.4	-0.0101318	11.4	-0.069519	11.4	-0.351563
11.4	-0.601563	11.3	-0.854675	11.5	0.0273438	11.5	0.53125	11.5	-0.0273438	11.5	-0.038269	11.5	-0.346863
11.5	-0.596863	11.4	-0.924988	11.6	0.0344238	11.6	0.206299	11.6	0.00390625	11.6	-0.0171509	11.6	-0.402344
11.6	-0.715637	11.5	-1.02185	11.7	-0.196777	11.7	-0.134277	11.7	-0.125	11.7	-0.124207	11.7	-0.453918
11.7	-0.957031	11.6	-1.08203	11.8	-0.883545	11.8	-0.828857	11.8	-0.457764	11.8	-0.476563	11.8	-0.898438
11.8	-1.51953	11.7	-1.57343	11.9	-2.10229	11.9	-1.91553	11.9	-0.889893	11.9	-0.921875	11.9	-1.50079
11.9	-3.01093	11.8	-2.56171	12	-3.6062	12	-2.56641	12	-0.949951	12	-0.998413	12	-1.30859
12	-5.42578	11.9	-4.11249	12.1	-4.93433	12.1	-1.48511	12.1	0.246094	12.1	0.653137	12.1	0.992981
12.1	-7.10236	12	-6.6875	12.2	-4.93896	12.2	1.61255	12.2	4.125	12.2	6.25391	12.2	7.10938
12.2	-4.96094	12.1	-9.26874	12.3	-3.66016	12.3	7.01099	12.3	10.8383	12.3	15.9586	12.3	16.2844
12.3	4.21484	12.2	-10.7266	12.4	-0.567871	12.4	13.8813	12.4	19.6804	12.4	28.7	12.4	28.1492
12.4	22.4297	12.3	-9.80231	12.5	4.25085	12.5	21.7789	12.5	30.1101	12.5	42.9953	12.5	40.9469
12.5	49.0789	12.4	-6.01953	12.6	10.4274	12.6	30.4938	12.6	40.8383	12.6	57.5782	12.6	53.9813
12.6	84.2188	12.5	0.518738	12.7	17.7899	12.7	39.7773	12.7	51.571	12.7	72.0945	12.7	66.7555
12.7	126.02	12.6	9.52112	12.8	26.2798	12.8	49.8094	12.8	62.5172	12.8	86.5805	12.8	79.493
12.8	173.878	12.7	20.6789	12.9	36.0055	12.9	60.525	12.9	73.4304	12.9	101.352	12.9	92.475
12.9	225.42	12.8	33.7485	13	46.4462	13	70.0516	13	84.5867	13	115.987	13	104.86
13	281.789	12.9	48.8531	13.1	55.1337	13.1	72.3876	13.1	91.3492	13.1	124.963	13.1	110.016
13.1	345.496	13	65.4312	13.2	58.7469	13.2	65.3844	13.2	87.3141	13.2	117.102	13.2	98.8
13.2	414.161	13.1	82.6235	13.3	57.9384	13.3	53.5673	13.3	70.8875	13.3	92.1407	13.3	73.9617
13.3	476.136	13.2	97.2172	13.4	54.9297	13.4	41.9727	13.4	51.1969	13.4	62.3843	13.4	48.2399
13.4	519.909	13.3	106.319	13.5	51.4438	13.5	32.8563	13.5	34.386	13.5	37.9461	13.5	27.7281
13.5	542.569	13.4	109.78	13.6	47.0313	13.6	25.675	13.6	21.9008	13.6	19.9469	13.6	13.2203
13.6	545.284	13.5	107.585	13.7	42.4102	13.7	19.832	13.7	12.9812	13.7	7.40863	13.7	2.99841
13.7	530.491	13.6	101.055	13.8	37.0735	13.8	14.7383	13.8	6.19458	13.8	-1.70392	13.8	-4.16174
13.8	502.391	13.7	91.3751	13.9	31.579	13.9	10.2493	13.9	0.598389	13.9	-8.08356	13.9	-9.43982
13.9	464.931	13.8	79.9258	14	26.3219	14	6.45313	14	-3.69922	14	-12.9328	14	-13.1976
14	421.941	13.9	67.6336	14.1	21.3407	14.1	2.89929	14.1	-7.08984	14.1	-16.6594	14.1	-16.1539
14.1	375.956	14	55.5079	14.2	16.5172	14.2	-0.525757	14.2	-9.85779	14.2	-19.482	14.2	-18.3195
14.2	328.831	14.1	43.7219	14.3	12.1548	14.3	-3.04834	14.3	-12.3453	14.3	-21.7554	14.3	-19.8805
14.3	281.905	14.2	32.3781	14.4	7.87585	14.4	-5.49292	14.4	-14.25	14.4	-22.9914	14.4	-21.1633
14.4	236.741	14.3	21.8078	14.5	4.33594	14.5	-7.44141	14.5	-15.6758	14.5	-24.1734	14.5	-21.9367
14.5	193.47	14.4	12.6094	14.6	1.04688	14.6	-9.47888	14.6	-16.9226	14.6	-25.3265	14.6	-22.432
14.6	152.834	14.5	3.96014	14.7	-1.99365	14.7	-11.1609	14.7	-17.9602	14.7	-25.6445	14.7	-22.8336
14.7	115.496	14.6	-3.54608	14.8	-4.42419	14.8	-12.5952	14.8	-18.7867	14.8	-25.6047	14.8	-22.7992
14.8	81.1344	14.7	-10.5359	14.9	-6.80151	14.9	-14.1453	14.9	-19.179	14.9	-25.5586	14.9	-22.5992
14.9	49.4367	14.8	-16.6258	15	-8.84375	15	-15.0046	15	-19.7297	15	-25.2492	15	-22.5055
15	20.85	14.9	-22.1805	15.1	-10.6694	15.1	-16.1187	15.1	-20.0242	15.1	-24.889	15.1	-22.2523
15.1	-5.17499	15	-26.975	15.2	-12.2625	15.2	-17.0593	15.2	-20.2015	15.2	-24.5531	15.2	-21.9719
15.2	-28.9125	15.1	-30.9211	15.3	-13.6499	15.3	-17.8195	15.3	-20.6101	15.3	-23.9586	15.3	-21.5179
15.3	-50.0226	15.2	-34.6703	15.4	-15.0171	15.4	-18.3203	15.4	-20.5625	15.4	-23.6859	15.4	-20.882
15.4	-69.0469	15.3	-38.0695	15.5	-15.9734	15.5	-18.9375	15.5	-20.5547	15.5	-23.2062	15.5	-20.4289
15.5	-85.9601	15.4	-40.9188	15.6	-16.7679	15.6	-19.4594	15.6	-20.929	15.6	-22.4414	15.6	-20.0016
15.6	-101.264	15.5	-43.3711	15.7	-17.728	15.7	-20.0726	15.7	-20.9836	15.7	-21.4969	15.7	-19.3711
15.7	-114.812	15.6	-45.507	15.8	-18.3765	15.8	-20.3843	15.8	-20.9047	15.8	-21.0742	15.8	-18.6641
15.8	-126.873	15.7	-47.4601	15.9	-18.864	15.9	-20.575	15.9	-20.9235	15.9	-20.6898	15.9	-18.2586
15.9	-137.691	15.8	-49.0492	16	-19.3116	16	-20.9437	16	-20.9688	16	-20.0781	16	-17.8
16	-147.057	15.9	-50.4102	16.1	-19.7413	16.1	-21.1195	16.1	-20.8477	16.1	-19.3812	16.1	-17.3156
16.1	-155.355	16	-51.6531	16.2	-20.2023	16.2	-21.5586	16.2	-20.7445	16.2	-18.8765	16.2	-16.8258
16.2	-162.888	16.1	-52.7469	16.3	-20.5366	16.3	-21.8164	16.3	-20.7906	16.3	-18.2054	16.3	-16.3641
16.3	-169.387	16.2	-53.6351	16.4	-20.7491	16.4	-21.9952	16.4	-20.8344	16.4	-17.7188	16.4	-15.8571
16.4	-175.267	16.3	-54.4562	16.5	-20.8906	16.5	-22.0789	16.5	-20.9125	16.5	-17.2625	16.5	-15.3125
16.5	-180.178	16.4	-55.1024	16.6	-21.0781	16.6	-22.225	16.6	-20.8617	16.6	-16.7336	16.6	-14.9648
16.6	-184.312	16.5	-55.5297	16.7	-21.1375	16.7	-22.4796	16.7	-20.6672	16.7	-16.1945	16.7	-14.6164
16.7	-188.08	16.6	-56.107	16.8	-21.2585	16.8	-22.6195	16.8	-20.6016	16.8	-15.8	16.8	-14.257
16.8	-191.607	16.7	-56.4703	16.9	-21.3796	16.9	-22.6523	16.9	-20.5133	16.9	-15.3492	16.9	-13.8258
16.9	-194.074	16.8	-56.6047	17	-21.4429	17	-22.6469	17	-20.4164	17	-14.9742	17	-13.4633
17	-196.938	16.9	-56.6758	17.1	-21.3031	17.1	-22.7172	17.1	-20.3047	17.1	-14.5687	17.1	-13.0602
17.1	-198.795	17	-56.8344	17.2	-21.1882	17.2	-22.7648	17.2	-20.5289	17.2	-14.1812	17.2	-12.764
17.2	-200.456	17.1	-57.0289	17.3	-21.2554	17.3	-22.8695	17.3	-20.5844	17.3	-13.8133	17.3	-12.5211
17.3	-202.058	17.2	-57.1304	17.4	-21.353	17.4	-23.0148	17.4	-20.7109	17.4	-13.4507	17.4	-12.2601
17.4	-203.141	17.3	-57.1555	17.5	-21.4031	17.5	-23.196	17.5	-20.5203	17.5	-13.1836	17.5	-11.9664
17.5	-204.105	17.4	-57.1086	17.6	-21.446	17.6	-23.2562	17.6	-20.3805	17.6	-12.9429	17.6	-11.7031
17.6	-204.735	17.5	-57.0859	17.7	-21.4327	17.7	-23.3367	17.7	-20.5867	17.7	-12.707	17.7	-11.4109
17.7	-205.2	17.6	-57.118	17.8	-21.3507	17.8	-23.418	17.8	-20.6453	17.8	-12.4742	17.8	-11.2477
17.8	-205.598	17.7	-56.8984	17.9	-21.207	17.9	-23.4258	17.9	-20.7438	17.9	-12.2773	17.9	-11.1727
17.9	-205.794	17.8	-56.6758	18	-21.0366	18	-23.446	18	-20.8445	18	-12.0586	18	-10.993
18	-205.608	17.9	-56.457	18.1	-20.8539	18.1	-23.5	18.1	-20.9688	18.1	-11.825	18.1	-10.8344
18.1	-205.489	18	-56.3391	18.2	-20.6593	18.2	-23.5187	18.2	-21.0071	18.2	-11.6797	18.2	-10.7195
18.2	-205.487	18.1	-56.1211	18.3	-20.4507	18.3	-23.5469	18.3	-21.0071	18.3	-11.5391	18.3	-10.6102
18.3	-205.166	18.2	-55.9195	18.4	-20.3969	18.4	-23.5499	18.4	-20.9968	18.4	-11.3758	18.4	-10.4453
18.4	-204.812	18.3	-55.6164	18.5	-20.3265	18.5	-23.5977	18.5	-21.0156	18.5	-11.2734	18.5	-10.2664
18.5	-204.455	18.4	-55.2938	18.6	-20.2515	18.6	-23.6312	18.6	-21.0774	18.6	-11.1672	18.6	-10.1883
18.6	-203.688	18.5	-54.9648	18.7	-20.1772	18.7	-23.6367	18.7	-21.1133	18.7	-11.082	18.7	-10.0984
18.7	-203.127	18.6	-54.6297	18.8	-19.9968	18.8	-23.6719	18.8	-21.1321	18.8	-11.0117	18.8	-10.0234
18.8	-202.502	18.7	-54.2891	18.9	-19.7773	18.9	-23.7015	18.9	-21.2461	18.9	-10.9102	18.9	-9.96954
18.9	-201.832	18.8	-53.9468	19	-19.5437	19	-23.7476	19	-21.4211	19	-10.8242	19	-9.90393
19	-201.055	18.9	-53.6437	19.1	-19.3789	19.1	-23.7413	19.1	-21.5375	19.1	-10.7375	19.1	-9.81641
19.1	-200.237	19	-53.2562	19.2	-19.1445	19.2	-23.7554	19.2	-21.6445	19.2	-10.6602	19.2	-9.73438
19.2	-199.341	19.1	-52.8344	19.3	-18.8992	19.3	-23.7914	19.3	-21.7415	19.3	-10.625	19.3	-9.65314
19.3	-198.313	19.2	-52.389	19.4	-18.6398	19.4	-23.7788	19.4	-21.843	19.4	-10.55	19.4	-9.57813
19.4	-197.309	19.3	-51.9281	19.5	-18.4382	19.5	-23.807	19.5	-21.9368	19.5	-10.4648	19.5	-9.55157
19.5	-196.367	19.4	-51.4789	19.6	-18.2609	19.6	-23.8344	19.6	-22.0297	19.6	-10.4289	19.6	-9.50079
19.6	-195.413	19.5	-51.0492	19.7	-18.0352	19.7	-23.8687	19.7	-22.1125	19.7	-10.3828	19.7	-9.48126
19.7	-194.38	19.6	-50.5914	19.8	-17.8624	19.8	-23.9171	19.8	-22.179	19.8	-10.3406	19.8	-9.45703
19.8	-193.33	19.7	-50.0797	19.9	-17.6241	19.9	-23.9265	19.9	-22.2601	19.9	-10.3344	19.9	-9.45001
19.9	-192.325	19.8	-49.6343	20	-17.3711	20	-23.9187	20	-22.3586	20	-10.3164	20	-9.41406
20	-191.27	19.9	-49.1102	20.1	-17.1515	20.1	-23.8726	20.1	-22.4758	20.1	-10.2891	20.1	-9.40625
20.1	-190.215	20	-48.6265	20.2	-16.9015	20.2	-23.8695	20.2	-22.5922	20.2	-10.2367	20.2	-9.39142
20.2	-189.148	20.1	-48.0906	20.3	-16.6547	20.3	-23.8438	20.3	-22.7133	20.3	-10.1922	20.3	-9.375
20.3	-188.049	20.2	-47.5352	20.4	-16.421	20.4	-23.8265	20.4	-22.8226	20.4	-10.1711	20.4	-9.39923
20.4	-186.952	20.3	-46.9336	20.5	-16.1664	20.5	-23.8132	20.5	-22.9414	20.5	-10.1555	20.5	-9.41797
20.5	-185.858	20.4	-46.4531	20.6	-15.9086	20.6	-23.7625	20.6	-23.0719	20.6	-10.1289	20.6	-9.42657
20.6	-184.788	20.5	-46.032	20.7	-15.6241	20.7	-23.7085	20.7	-23.1664	20.7	-10.1469	20.7	-9.44531
20.7	-183.69	20.6	-45.5	20.8	-15.3461	20.8	-23.6335	20.8	-23.2679	20.8	-10.1492	20.8	-9.46954
20.8	-182.545	20.7	-44.9883	20.9	-15.0883	20.9	-23.6179	20.9	-23.3704	20.9	-10.1828	20.9	-9.48126
20.9	-181.29	20.8	-44.4562	21	-14.8468	21	-23.575	21	-23.4945	21	-10.1945	21	-9.48828
21	-180.036	20.9	-43.9414	21.1	-14.5991	21.1	-23.5508	21.1	-23.6078	21.1	-10.1953	21.1	-9.49298
21.1	-178.703	21	-43.4141	21.2	-14.3383	21.2	-23.5046	21.2	-23.6976	21.2	-10.1906	21.2	-9.49298
21.2	-177.359	21.1	-42.8656	21.3	-14.0718	21.3	-23.4633	21.3	-23.7914	21.3	-10.1828	21.3	-9.50311
21.3	-176.383	21.2	-42.2734	21.4	-13.8148	21.4	-23.4531	21.4	-23.8649	21.4	-10.1875	21.4	-9.51251
21.4	-175.324	21.3	-41.7172	21.5	-13.5554	21.5	-23.4148	21.5	-23.9594	21.5	-10.2188	21.5	-9.54688
21.5	-174.222	21.4	-41.1602	21.6	-13.2836	21.6	-23.3906	21.6	-24.0524	21.6	-10.2367	21.6	-9.56329
21.6	-173.102	21.5	-40.5757	21.7	-13.0132	21.7	-23.353	21.7	-24.1516	21.7	-10.2531	21.7	-9.60547
21.7	-172.035	21.6	-39.9758	21.8	-12.7397	21.8	-23.3195	21.8	-24.2516	21.8	-10.2703	21.8	-9.62891
21.8	-170.938	21.7	-39.4039	21.9	-12.514	21.9	-23.2554	21.9	-24.3625	21.9	-10.2992	21.9	-9.64612
21.9	-169.807	21.8	-38.8195	22	-12.2437	22	-23.1866	22	-24.4469	22	-10.3195	22	-9.6828
22	-168.695	21.9	-38.2047	22.1	-11.9594	22.1	-23.157	22.1	-24.525	22.1	-10.3524	22.1	-9.69922
22.1	-167.554	22	-37.6	22.2	-11.6538	22.2	-23.125	22.2	-24.6312	22.2	-10.3773	22.2	-9.72815
22.2	-166.41	22.1	-37.0445	22.3	-11.3765	22.3	-23.0952	22.3	-24.7125	22.3	-10.3914	22.3	-9.75311
22.3	-165.304	22.2	-36.4351	22.4	-11.0952	22.4	-23.0391	22.4	-24.8187	22.4	-10.4164	22.4	-9.78906
22.4	-164.217	22.3	-35.85	22.5	-10.8093	22.5	-22.9688	22.5	-24.9203	22.5	-10.4453	22.5	-9.80157
22.5	-163.033	22.4	-35.2476	22.6	-10.5249	22.6	-22.9132	22.6	-25.0328	22.6	-10.4766	22.6	-9.84454
22.6	-161.826	22.5	-34.6461	22.7	-10.2	22.7	-22.8867	22.7	-25.136	22.7	-10.4961	22.7	-9.86249
22.7	-160.644	22.6	-34.0172	22.8	-9.896	22.8	-22.8445	22.8	-25.2399	22.8	-10.5179	22.8	-9.90002
22.8	-159.526	22.7	-33.4125	22.9	-9.56787	22.9	-22.7843	22.9	-25.318	22.9	-10.5352	22.9	-9.9375
22.9	-158.396	22.8	-32.8055	23	-9.23511	23	-22.7429	23	-25.3883	23	-10.5586	23	-9.98828
23	-157.303	22.9	-32.189	23.1	-8.93896	23.1	-22.6945	23.1	-25.4711	23.1	-10.593	23.1	-10.0273
23.1	-156.181	23	-31.575	23.2	-8.66797	23.2	-22.6484	23.2	-25.5485	23.2	-10.6125	23.2	-10.0664
23.2	-155.048	23.1	-30.9195	23.3	-8.3656	23.3	-22.5703	23.3	-25.6305	23.3	-10.6289	23.3	-10.0906
23.3	-153.92	23.2	-30.3023	23.4	-8.03906	23.4	-22.5117	23.4	-25.6969	23.4	-10.6586	23.4	-10.1336
23.4	-152.795	23.3	-29.7047	23.5	-7.75464	23.5	-22.4445	23.5	-25.7914	23.5	-10.6875	23.5	-10.168
23.5	-151.704	23.4	-29.0711	23.6	-7.47729	23.6	-22.3672	23.6	-25.8766	23.6	-10.7101	23.6	-10.2039
23.6	-150.608	23.5	-28.4351	23.7	-7.18115	23.7	-22.3086	23.7	-25.9586	23.7	-10.7383	23.7	-10.2336
23.7	-149.482	23.6	-27.7852	23.8	-6.90698	23.8	-22.2422	23.8	-26.0258	23.8	-10.7578	23.8	-10.2625
23.8	-148.365	23.7	-27.1656	23.9	-6.625	23.9	-22.1836	23.9	-26.111	23.9	-10.7992	23.9	-10.2969
23.9	-147.259	23.8	-26.5438	24	-6.31396	24	-22.1046	24	-26.2008	24	-10.8281	24	-10.3328
24	-146.138	23.9	-25.9109	24.1	-6.00391	24.1	-22.0508	24.1	-26.2789	24.1	-10.8594	24.1	-10.3789
24.1	-145.022	24	-25.2578	24.2	-5.68823	24.2	-22.0039	24.2	-26.3571	24.2	-10.8742	24.2	-10.4149
24.2	-143.903	24.1	-24.5992	24.3	-5.39136	24.3	-21.9047	24.3	-26.4437	24.3	-10.9086	24.3	-10.4539
24.3	-142.814	24.2	-23.9609	24.4	-5.09375	24.4	-21.8516	24.4	-26.5359	24.4	-10.9375	24.4	-10.4836
24.4	-141.731	24.3	-23.3047	24.5	-4.78271	24.5	-21.7882	24.5	-26.611	24.5	-10.9641	24.5	-10.5242
24.5	-140.634	24.4	-22.618	24.6	-4.4812	24.6	-21.7195	24.6	-26.6843	24.6	-10.9883	24.6	-10.5664
24.6	-139.532	24.5	-21.9562	24.7	-4.16797	24.7	-21.6625	24.7	-26.7367	24.7	-11.0273	24.7	-10.6141
24.7	-138.435	24.6	-21.2977	24.8	-3.85229	24.8	-21.589	24.8	-26.8054	24.8	-11.0539	24.8	-10.6484
24.8	-137.357	24.7	-20.6523	24.9	-3.54211	24.9	-21.5164	24.9	-26.861	24.9	-11.0734	24.9	-10.6922
24.9	-136.289	24.8	-20.0008	25	-3.21948	25	-21.4554	25	-26.9086	25	-11.0977	25	-10.7383
25	-135.197	24.9	-19.3391	25.1	-2.92578	25.1	-21.4023	25.1	-26.9742	25.1	-11.1359	25.1	-10.7742
25.1	-134.122	25	-18.6523	25.2	-2.62183	25.2	-21.3312	25.2	-27.0313	25.2	-11.1555	25.2	-10.8117
25.2	-133.032	25.1	-17.9922	25.3	-2.30859	25.3	-21.2413	25.3	-27.0914	25.3	-11.1859	25.3	-10.8524
25.3	-131.973	25.2	-17.3367	25.4	-1.97656	25.4	-21.1836	25.4	-27.1547	25.4	-11.2266	25.4	-10.8836
25.4	-130.888	25.3	-16.7266	25.5	-1.66479	25.5	-21.1195	25.5	-27.2351	25.5	-11.2726	25.5	-10.9297
25.5	-129.809	25.4	-16.0617	25.6	-1.36633	25.6	-21.0304	25.6	-27.3024	25.6	-11.2922	25.6	-10.9734
25.6	-128.704	25.5	-15.4188	25.7	-1.01953	25.7	-20.9766	25.7	-27.3727	25.7	-11.3359	25.7	-11.0195
25.7	-127.563	25.6	-14.7773	25.8	-0.692139	25.8	-20.8741	25.8	-27.4343	25.8	-11.3789	25.8	-11.0586
25.8	-126.509	25.7	-14.0898	25.9	-0.395264	25.9	-20.7679	25.9	-27.4977	25.9	-11.4133	25.9	-11.0828
25.9	-125.5	25.8	-13.4562	26	-0.0577393	26	-20.6953	26	-27.5524	26	-11.4523	26	-11.1242
26	-124.485	25.9	-12.8351	26.1	0.289063	26.1	-20.6117	26.1	-27.6273	26.1	-11.5031	26.1	-11.1484
26.1	-123.419	26	-12.1828	26.2	0.63208	26.2	-20.4789	26.2	-27.6882	26.2	-11.5469	26.2	-11.1969
26.2	-122.363	26.1	-11.5391	26.3	0.961792	26.3	-20.3624	26.3	-27.7594	26.3	-11.593	26.3	-11.2305
26.3	-121.317	26.2	-10.8937	26.4	1.30078	26.4	-20.2601	26.4	-27.8219	26.4	-11.6367	26.4	-11.2625
26.4	-120.262	26.3	-10.2352	26.5	1.64844	26.5	-20.1367	26.5	-27.8796	26.5	-11.6828	26.5	-11.3039
26.5	-119.2	26.4	-9.56952	26.6	1.98828	26.6	-20.0492	26.6	-27.9235	26.6	-11.7336	26.6	-11.3445
26.6	-118.145	26.5	-8.90546	26.7	2.35632	26.7	-19.9445	26.7	-27.9578	26.7	-11.7656	26.7	-11.3867
26.7	-117.072	26.6	-8.24451	26.8	2.68677	26.8	-19.8663	26.8	-27.9821	26.8	-11.8234	26.8	-11.4344
26.8	-116.036	26.7	-7.54297	26.9	3.00781	26.9	-19.7726	26.9	-28.025	26.9	-11.8625	26.9	-11.4641
26.9	-115.047	26.8	-6.84686	27	3.38367	27	-19.6976	27	-28.071	27	-11.9063	27	-11.5008
27	-113.996	26.9	-6.19373	27.1	3.71875	27.1	-19.5851	27.1	-28.1101	27.1	-11.9445	27.1	-11.5352
27.1	-112.953	27	-5.53125	27.2	4.03442	27.2	-19.4984	27.2	-28.1461	27.2	-11.9883	27.2	-11.5828
27.2	-111.914	27.1	-4.88281	27.3	4.39221	27.3	-19.4132	27.3	-28.2	27.3	-12.0258	27.3	-11.6219
27.3	-110.873	27.2	-4.20544	27.4	4.76099	27.4	-19.3312	27.4	-28.2555	27.4	-12.0633	27.4	-11.668
27.4	-109.855	27.3	-3.54608	27.5	5.0907	27.5	-19.2413	27.5	-28.2898	27.5	-12.1078	27.5	-11.7109
27.5	-108.836	27.4	-2.89764	27.6	5.41406	27.6	-19.1476	27.6	-28.3406	27.6	-12.1563	27.6	-11.743
27.6	-107.824	27.5	-2.21796	27.7	5.75085	27.7	-19.0101	27.7	-28.3578	27.7	-12.1992	27.7	-11.7695
27.7	-106.805	27.6	-1.56952	27.8	6.08679	27.8	-18.8937	27.8	-28.4141	27.8	-12.2367	27.8	-11.8086
27.8	-105.778	27.7	-0.921875	27.9	6.42969	27.9	-18.7914	27.9	-28.4821	27.9	-12.2695	27.9	-11.8328
27.9	-104.751	27.8	-0.291382	28	6.7821	28	-18.6866	28	-28.525	28	-12.2922	28	-11.8742
28	-103.746	27.9	0.324219	28.1	7.12891	28.1	-18.6163	28.1	-28.5671	28.1	-12.3312	28.1	-11.9078
28.1	-102.739	28	0.989868	28.2	7.4696	28.2	-18.5414	28.2	-28.6149	28.2	-12.3789	28.2	-11.9414
28.2	-101.749	28.1	1.68909	28.3	7.82813	28.3	-18.4515	28.3	-28.6609	28.3	-12.4086	28.3	-11.9719
28.3	-100.751	28.2	2.36487	28.4	8.17969	28.4	-18.4125	28.4	-28.6813	28.4	-12.4375	28.4	-12.0125
28.4	-99.7539	28.3	3.02344	28.5	8.53992	28.5	-18.3976	28.5	-28.6758	28.5	-12.4719	28.5	-12.0586
28.5	-98.7539	28.4	3.68597	28.6	8.88989	28.6	-18.2374	28.6	-28.7242	28.6	-12.5031	28.6	-12.0977
28.6	-97.7586	28.5	4.36328	28.7	9.27039	28.7	-18.1039	28.7	-28.7555	28.7	-12.5226	28.7	-12.1219
28.7	-96.7773	28.6	4.99847	28.8	9.6344	28.8	-18.0023	28.8	-28.8008	28.8	-12.5547	28.8	-12.1602
28.8	-95.7703	28.7	5.66406	28.9	9.98438	28.9	-17.8976	28.9	-28.8093	28.9	-12.593	28.9	-12.1875
28.9	-94.7922	28.8	6.32269	29	10.3438	29	-17.7797	29	-28.8656	29	-12.6289	29	-12.2188
29	-93.7969	28.9	6.98907	29.1	10.6852	29.1	-17.6866	29.1	-28.9391	29.1	-12.6586	29.1	-12.2461
29.1	-92.8094	29	7.65314	29.2	11.0234	29.2	-17.5679	29.2	-29.0203	29.2	-12.6844	29.2	-12.282
29.2	-91.7938	29.1	8.3266	29.3	11.3602	29.3	-17.4633	29.3	-29.0789	29.3	-12.7094	29.3	-12.3203
29.3	-90.7969	29.2	8.96094	29.4	11.6805	29.4	-17.3617	29.4	-29.15	29.4	-12.7336	29.4	-12.3524
29.4	-89.8008	29.3	9.59143	29.5	12.0039	29.5	-17.2406	29.5	-29.2164	29.5	-12.7773	29.5	-12.3789
29.5	-88.7805	29.4	10.2672	29.6	12.329	29.6	-17.1328	29.6	-29.2429	29.6	-12.8039	29.6	-12.4102
29.6	-87.7578	29.5	10.9149	29.7	12.6805	29.7	-17.0093	29.7	-29.282	29.7	-12.8359	29.7	-12.4375
29.7	-86.7188	29.6	11.5805	29.8	13.0039	29.8	-16.9047	29.8	-29.3063	29.8	-12.8578	29.8	-12.4688
29.8	-85.6727	29.7	12.2477	29.9	13.3125	29.9	-16.8077	29.9	-29.3164	29.9	-12.8867	29.9	-12.5008
29.9	-84.7648	29.8	12.9156	30	13.65	30	-16.7133	30	-29.3375	30	-12.925	30	-12.5391
30	-83.8555	29.9	13.5633	30.1	14.0087	30.1	-16.6117	30.1	-29.3571	30.1	-12.9523	30.1	-12.5586
30.1	-82.9375	30	14.2086	30.2	14.329	30.2	-16.5265	30.2	-29.3789	30.2	-12.9836	30.2	-12.5945
30.2	-81.9734	30.1	14.8657	30.3	14.6719	30.3	-16.4272	30.3	-29.3961	30.3	-13.0156	30.3	-12.6336
30.3	-80.9805	30.2	15.532	30.4	15.0243	30.4	-16.3398	30.4	-29.4453	30.4	-13.0391	30.4	-12.675
30.4	-80.0078	30.3	16.2211	30.5	15.3727	30.5	-16.2554	30.5	-29.4695	30.5	-13.0656	30.5	-12.7117
30.5	-79.0195	30.4	16.8883	30.6	15.7031	30.6	-16.1984	30.6	-29.5172	30.6	-13.093	30.6	-12.75
30.6	-78.0344	30.5	17.5485	30.7	16.0087	30.7	-16.1195	30.7	-29.5641	30.7	-13.1242	30.7	-12.7695
30.7	-77.0391	30.6	18.2047	30.8	16.2977	30.8	-16.0531	30.8	-29.6172	30.8	-13.1633	30.8	-12.7938
30.8	-76.0555	30.7	18.8571	30.9	16.6133	30.9	-15.9562	30.9	-29.6539	30.9	-13.1875	30.9	-12.8328
30.9	-75.0586	30.8	19.5219	31	16.9508	31	-15.8617	31	-29.6969	31	-13.2258	31	-12.8711
31	-74.1242	30.9	20.1805	31.1	17.2695	31.1	-15.7719	31.1	-29.7461	31.1	-13.2531	31.1	-12.8984
31.1	-73.1563	31	20.85	31.2	17.6063	31.2	-15.6859	31.2	-29.7867	31.2	-13.2844	31.2	-12.9375
31.2	-72.207	31.1	21.518	31.3	17.9274	31.3	-15.5726	31.3	-29.8601	31.3	-13.3164	31.3	-12.9688
31.3	-71.2383	31.2	22.2047	31.4	18.2782	31.4	-15.5023	31.4	-29.9109	31.4	-13.3547	31.4	-13.0047
31.4	-70.2773	31.3	22.8531	31.5	18.6016	31.5	-15.3976	31.5	-29.9421	31.5	-13.382	31.5	-13.0391
31.5	-69.343	31.4	23.525	31.6	18.9462	31.6	-15.271	31.6	-29.9781	31.6	-13.4133	31.6	-13.0781
31.6	-68.3789	31.5	24.1977	31.7	19.2743	31.7	-15.1547	31.7	-30.0046	31.7	-13.4492	31.7	-13.1141
31.7	-67.4149	31.6	24.8805	31.8	19.6337	31.8	-15.0304	31.8	-30.0273	31.8	-13.4836	31.8	-13.1484
31.8	-66.4641	31.7	25.5571	31.9	19.9899	31.9	-14.8921	31.9	-30.0398	31.9	-13.5148	31.9	-13.168
31.9	-65.5359	31.8	26.2446	32	20.3329	32	-14.7687	32	-30.0875	32	-13.5422	32	-13.2039
32	-64.5851	31.9	26.9352	32.1	20.6891	32.1	-14.6421	32.1	-30.114	32.1	-13.5781	32.1	-13.2305
32.1	-63.6437	32	27.6047	32.2	21.036	32.2	-14.514	32.2	-30.1335	32.2	-13.6047	32.2	-13.2578
32.2	-62.707	32.1	28.2859	32.3	21.3563	32.3	-14.3851	32.3	-30.1484	32.3	-13.6367	32.3	-13.2891
32.3	-61.75	32.2	28.9797	32.4	21.6766	32.4	-14.2562	32.4	-30.1531	32.4	-13.675	32.4	-13.3086
32.4	-60.8055	32.3	29.6617	32.5	21.993	32.5	-14.1226	32.5	-30.1578	32.5	-13.7054	32.5	-13.3406
32.5	-59.8547	32.4	30.3813	32.6	22.3407	32.6	-13.9867	32.6	-30.1648	32.6	-13.7383	32.6	-13.3789
32.6	-58.9102	32.5	31.025	32.7	22.7017	32.7	-13.8726	32.7	-30.1719	32.7	-13.7648	32.7	-13.418
32.7	-57.9719	32.6	31.6352	32.8	23.0634	32.8	-13.7491	32.8	-30.1609	32.8	-13.7922	32.8	-13.4375
32.8	-57.0391	32.7	32.2586	32.9	23.411	32.9	-13.6421	32.9	-30.1696	32.9	-13.8203	32.9	-13.4734
32.9	-56.1141	32.8	32.8375	33	23.7548	33	-13.5336	33	-30.1797	33	-13.843	33	-13.5078
33	-55.1633	32.9	33.5781	33.1	24.1141	33.1	-13.4132	33.1	-30.1852	33.1	-13.8742	33.1	-13.5391
33.1	-54.2234	33	34.3703	33.2	24.4712	33.2	-13.2827	33.2	-30.1992	33.2	-13.9016	33.2	-13.5586
33.2	-53.2813	33.1	35.0242	33.3	24.8329	33.3	-13.1538	33.3	-30.1774	33.3	-13.9328	33.3	-13.5875
33.3	-52.3227	33.2	35.6391	33.4	25.2118	33.4	-13.0179	33.4	-30.2234	33.4	-13.9601	33.4	-13.6164
33.4	-51.3789	33.3	36.2906	33.5	25.5875	33.5	-12.9038	33.5	-30.2351	33.5	-13.993	33.5	-13.6336
33.5	-50.4453	33.4	36.9868	33.6	25.9618	33.6	-12.7804	33.6	-30.2578	33.6	-14.0219	33.6	-13.6719
33.6	-49.5195	33.5	37.6469	33.7	26.3375	33.7	-12.6616	33.7	-30.2867	33.7	-14.0422	33.7	-13.6992
33.7	-48.5898	33.6	38.2993	33.8	26.668	33.8	-12.5258	33.8	-30.3086	33.8	-14.0703	33.8	-13.7188
33.8	-47.6602	33.7	38.9555	33.9	27.0103	33.9	-12.3765	33.9	-30.3328	33.9	-14.0851	33.9	-13.75
33.9	-46.7227	33.8	39.6352	34	27.3837	34	-12.2413	34	-30.3688	34	-14.1125	34	-13.7773
34	-45.793	33.9	40.3266	34.1	27.7555	34.1	-12.0984	34.1	-30.3984	34.1	-14.1406	34.1	-13.8086
34.1	-44.8469	34	40.975	34.2	28.1172	34.2	-11.975	34.2	-30.4313	34.2	-14.1555	34.2	-13.8406
34.2	-43.9102	34.1	41.6305	34.3	28.4751	34.3	-11.8656	34.3	-30.446	34.3	-14.1828	34.3	-13.8789
34.3	-42.9727	34.2	42.2875	34.4	28.8134	34.4	-11.7758	34.4	-30.4805	34.4	-14.2094	34.4	-13.8984
34.4	-42.0508	34.3	42.9438	34.5	29.1484	34.5	-11.6694	34.5	-30.4656	34.5	-14.2352	34.5	-13.9305
34.5	-41.1242	34.4	43.6188	34.6	29.5024	34.6	-11.5531	34.6	-30.4656	34.6	-14.2648	34.6	-13.9688
34.6	-40.2062	34.5	44.2492	34.7	29.8055	34.7	-11.4327	34.7	-30.4734	34.7	-14.3039	34.7	-14.0047
34.7	-39.2859	34.6	44.9196	34.8	30.1415	34.8	-11.314	34.8	-30.4851	34.8	-14.3351	34.8	-14.0313
34.8	-38.3469	34.7	45.5617	34.9	30.5103	34.9	-11.1976	34.9	-30.5125	34.9	-14.3695	34.9	-14.0633
34.9	-37.4102	34.8	46.225	35	30.8719	35	-11.103	35	-30.532	35	-14.3867	35	-14.1016
35	-36.4805	34.9	46.8657	35.1	31.2477	35.1	-10.9867	35.1	-30.5391	35.1	-14.4297	35.1	-14.1289
35.1	-35.5703	35	47.5258	35.2	31.6055	35.2	-10.8843	35.2	-30.5485	35.2	-14.4445	35.2	-14.1602
35.2	-34.6406	35.1	48.1813	35.3	31.9673	35.3	-10.7562	35.3	-30.5632	35.3	-14.4758	35.3	-14.2039
35.3	-33.7211	35.2	48.8586	35.4	32.329	35.4	-10.6241	35.4	-30.5664	35.4	-14.4984	35.4	-14.2336
35.4	-32.7742	35.3	49.5406	35.5	32.6923	35.5	-10.489	35.5	-30.5875	35.5	-14.5273	35.5	-14.2625
35.5	-31.8633	35.4	50.1984	35.6	33.0376	35.6	-10.3695	35.6	-30.6335	35.6	-14.5539	35.6	-14.3008
35.6	-30.9562	35.5	50.8813	35.7	33.4188	35.7	-10.2367	35.7	-30.6563	35.7	-14.5812	35.7	-14.3328
35.7	-30.0148	35.6	51.55	35.8	33.7946	35.8	-10.1195	35.8	-30.6726	35.8	-14.6141	35.8	-14.3711
35.8	-29.0977	35.7	52.2086	35.9	34.1578	35.9	-10.0015	35.9	-30.6969	35.9	-14.639	35.9	-14.3984
35.9	-28.2062	35.8	52.9055	36	34.5204	36	-9.88904	36	-30.7039	36	-14.6516	36	-14.4297
36	-27.2891	35.9	53.5532	36.1	34.8798	36.1	-9.80701	36.1	-30.7039	36.1	-14.6828	36.1	-14.457
36.1	-26.3789	36	54.1743	36.2	35.2173	36.2	-9.70154	36.2	-30.6992	36.2	-14.7101	36.2	-14.4852
36.2	-25.4922	36.1	54.8422	36.3	35.5758	36.3	-9.59607	36.3	-30.7008	36.3	-14.7383	36.3	-14.5195
36.3	-24.5898	36.2	55.4992	36.4	35.9344	36.4	-9.48901	36.4	-30.6843	36.4	-14.7648	36.4	-14.5703
36.4	-23.6719	36.3	56.1461	36.5	36.2782	36.5	-9.38977	36.5	-30.696	36.5	-14.7891	36.5	-14.5977
36.5	-22.757	36.4	56.8032	36.6	36.647	36.6	-9.29919	36.6	-30.6914	36.6	-14.8187	36.6	-14.6336
36.6	-21.8469	36.5	57.4562	36.7	37.0087	36.7	-9.17651	36.7	-30.6765	36.7	-14.8555	36.7	-14.6758
36.7	-20.9367	36.6	58.1359	36.8	37.3524	36.8	-9.08826	36.8	-30.6765	36.8	-14.882	36.8	-14.7188
36.8	-20.0117	36.7	58.8062	36.9	37.693	36.9	-8.98669	36.9	-30.6992	36.9	-14.9133	36.9	-14.7625
36.9	-19.1094	36.8	59.4805	37	38.025	37	-8.87256	37	-30.7203	37	-14.9375	37	-14.8008
37	-18.2305	36.9	60.1547	37.1	38.3407	37.1	-8.75305	37.1	-30.7578	37.1	-14.9641	37.1	-14.8281
37.1	-17.3398	37	60.8227	37.2	38.6587	37.2	-8.62646	37.2	-30.7742	37.2	-14.9953	37.2	-14.8719
37.2	-16.4648	37.1	61.5063	37.3	39.0009	37.3	-8.48193	37.3	-30.8086	37.3	-15.0273	37.3	-14.918
37.3	-15.582	37.2	62.211	37.4	39.3531	37.4	-8.38904	37.4	-30.8492	37.4	-15.0656	37.4	-14.957
37.4	-14.7016	37.3	62.8843	37.5	39.7125	37.5	-8.26794	37.5	-30.8953	37.5	-15.0977	37.5	-14.9883
37.5	-13.8398	37.4	63.5461	37.6	40.0563	37.6	-8.146	37.6	-30.9343	37.6	-15.1242	37.6	-15.032
37.6	-12.9578	37.5	64.2016	37.7	40.3961	37.7	-8.021	37.7	-30.9766	37.7	-15.1555	37.7	-15.0703
37.7	-12.0727	37.6	64.8547	37.8	40.7509	37.8	-7.90857	37.8	-31.0125	37.8	-15.1703	37.8	-15.1141
37.8	-11.1797	37.7	65.5187	37.9	41.1149	37.9	-7.7406	37.9	-31.0485	37.9	-15.1906	37.9	-15.1484
37.9	-10.3055	37.8	66.1773	38	41.4774	38	-7.63123	38	-31.082	38	-15.2234	38	-15.2039
38	-9.38907	37.9	66.7961	38.1	41.8462	38.1	-7.50854	38.1	-31.0914	38.1	-15.2601	38.1	-15.25
38.1	-8.5047	38	67.4445	38.2	42.2274	38.2	-7.40857	38.2	-31.1211	38.2	-15.2726	38.2	-15.2813
38.2	-7.62811	38.1	68.0773	38.3	42.5914	38.3	-7.29138	38.3	-31.1453	38.3	-15.3008	38.3	-15.3164
38.3	-6.73828	38.2	68.6938	38.4	42.9235	38.4	-7.13428	38.4	-31.1765	38.4	-15.3234	38.4	-15.3563
38.4	-5.83514	38.3	69.2914	38.5	43.2555	38.5	-7.00146	38.5	-31.196	38.5	-15.3547	38.5	-15.3789
38.5	-4.94611	38.4	69.9047	38.6	43.579	38.6	-6.88123	38.6	-31.2351	38.6	-15.382	38.6	-15.4102
38.6	-4.06094	38.5	70.5148	38.7	43.9165	38.7	-6.74365	38.7	-31.2422	38.7	-15.4102	38.7	-15.4422
38.7	-3.19922	38.6	71.143	38.8	44.2391	38.8	-6.65076	38.8	-31.2546	38.8	-15.4445	38.8	-15.4805
38.8	-2.32813	38.7	71.7492	38.9	44.5836	38.9	-6.52026	38.9	-31.282	38.9	-15.4719	38.9	-15.5117
38.9	-1.44611	38.8	72.3305	39	44.9039	39	-6.40076	39	-31.3203	39	-15.5031	39	-15.5438
39	-0.596863	38.9	73.0024	39.1	45.2555	39.1	-6.25537	39.1	-31.3523	39.1	-15.5226	39.1	-15.5703
39.1	0.25	39	73.6281	39.2	45.5953	39.2	-6.10303	39.2	-31.3883	39.2	-15.5617	39.2	-15.5969
39.2	1.12189	39.1	74.2524	39.3	45.943	39.3	-5.95935	39.3	-31.4265	39.3	-15.593	39.3	-15.6172
39.3	1.96094	39.2	74.8859	39.4	46.2977	39.4	-5.84521	39.4	-31.4414	39.4	-15.6141	39.4	-15.6484
39.4	2.80548	39.3	75.5266	39.5	46.7008	39.5	-5.73279	39.5	-31.4734	39.5	-15.6437	39.5	-15.6727
39.5	3.64063	39.4	76.1821	39.6	47.0836	39.6	-5.61011	39.6	-31.4773	39.6	-15.675	39.6	-15.6992
39.6	4.50781	39.5	76.8156	39.7	47.4556	39.7	-5.47571	39.7	-31.4773	39.7	-15.6945	39.7	-15.7234
39.7	5.35236	39.6	77.4664	39.8	47.8563	39.8	-5.34448	39.8	-31.4727	39.8	-15.7219	39.8	-15.75
39.8	6.21094	39.7	78.1008	39.9	48.2368	39.9	-5.18982	39.9	-31.4656	39.9	-15.7531	39.9	-15.7695
39.9	7.05859	39.8	78.7407	40	48.6063	40	-5.06787	40	-31.4648	40	-15.7844	40	-15.793
40	7.89844	39.9	79.3547	40.1	48.9946	40.1	-4.95935	40.1	-31.4773	40.1	-15.8117	40.1	-15.7977
40.1	8.75	40	79.9594	40.2	49.3805	40.2	-4.85693	40.2	-31.4695	40.2	-15.8524	40.2	-15.8156
40.2	9.59454	40.1	80.6172	40.3	49.7603	40.3	-4.76013	40.3	-31.4758	40.3	-15.8859	40.3	-15.8367
40.3	10.4734	40.2	81.2648	40.4	50.0836	40.4	-4.646	40.4	-31.4734	40.4	-15.9133	40.4	-15.8547
40.4	11.332	40.3	81.8696	40.5	50.4071	40.5	-4.53271	40.5	-31.4899	40.5	-15.9445	40.5	-15.8758
40.5	12.1766	40.4	82.4985	40.6	50.7438	40.6	-4.42029	40.6	-31.4954	40.6	-15.9789	40.6	-15.8859
40.6	13.0148	40.5	83.1047	40.7	51.1031	40.7	-4.30615	40.7	-31.4968	40.7	-16.0047	40.7	-15.9063
40.7	13.8719	40.6	83.7258	40.8	51.4478	40.8	-4.18506	40.8	-31.4773	40.8	-16.0297	40.8	-15.9344
40.8	14.7305	40.7	84.3461	40.9	51.7821	40.9	-4.06873	40.9	-31.4656	40.9	-16.0539	40.9	-15.9578
40.9	15.575	40.8	84.9914	41	52.1227	41	-3.95459	41	-31.4844	41	-16.0781	41	-15.9727
41	16.4219	40.9	85.6055	41.1	52.4742	41.1	-3.82568	41.1	-31.4773	41.1	-16.1	41.1	-15.9805
41.1	17.2531	41	86.2453	41.2	52.8024	41.2	-3.69763	41.2	-31.4727	41.2	-16.1219	41.2	-16.007
41.2	18.1024	41.1	86.9133	41.3	53.1617	41.3	-3.57568	41.3	-31.4578	41.3	-16.1508	41.3	-16.0273
41.3	18.9539	41.2	87.5539	41.4	53.5406	41.4	-3.43506	41.4	-31.4187	41.4	-16.1711	41.4	-16.0438
41.4	19.7859	41.3	88.1945	41.5	53.9117	41.5	-3.29138	41.5	-31.4023	41.5	-16.2023	41.5	-16.0539
41.5	20.6359	41.4	88.843	41.6	54.2368	41.6	-3.11865	41.6	-31.407	41.6	-16.2383	41.6	-16.068
41.6	21.493	41.5	89.5031	41.7	54.5797	41.7	-2.9906	41.7	-31.4297	41.7	-16.2648	41.7	-16.0969
41.7	22.3398	41.6	90.1586	41.8	54.943	41.8	-2.88428	41.8	-31.446	41.8	-16.2891	41.8	-16.1141
41.8	23.1727	41.7	90.8165	41.9	55.3141	41.9	-2.78271	41.9	-31.457	41.9	-16.3109	41.9	-16.1437
41.9	24.0031	41.8	91.4719	42	55.6298	42	-2.65857	42	-31.4664	42	-16.3312	42	-16.1649
42	24.8328	41.9	92.1148	42.1	55.9478	42.1	-2.53662	42.1	-31.5046	42.1	-16.3594	42.1	-16.1875
42.1	25.668	42	92.7657	42.2	56.275	42.2	-2.41553	42.2	-31.5117	42.2	-16.389	42.2	-16.2188
42.2	26.5047	42.1	93.4133	42.3	56.6102	42.3	-2.27966	42.3	-31.5046	42.3	-16.4016	42.3	-16.2469
42.3	27.3594	42.2	94.0539	42.4	56.9235	42.4	-2.15771	42.4	-31.5085	42.4	-16.4375	42.4	-16.2695
42.4	28.207	42.3	94.675	42.5	57.2242	42.5	-2.04443	42.5	-31.5391	42.5	-16.4641	42.5	-16.2891
42.5	29.0711	42.4	95.3039	42.6	57.5259	42.6	-1.92725	42.6	-31.5828	42.6	-16.4836	42.6	-16.3203
42.6	29.918	42.5	95.9282	42.7	57.8954	42.7	-1.81873	42.7	-31.5898	42.7	-16.5	42.7	-16.3477
42.7	30.743	42.6	96.5539	42.8	58.2399	42.8	-1.68896	42.8	-31.5945	42.8	-16.5226	42.8	-16.3789
42.8	31.5633	42.7	97.1758	42.9	58.568	42.9	-1.54834	42.9	-31.5836	42.9	-16.5492	42.9	-16.3984
42.9	32.4133	42.8	97.7993	43	58.9517	43	-1.40076	43	-31.5547	43	-16.5781	43	-16.4391
43	33.2281	42.9	98.4086	43.1	59.3102	43.1	-1.27417	43.1	-31.5281	43.1	-16.5969	43.1	-16.4609
43.1	34.0734	43	99.0313	43.2	59.6626	43.2	-1.13818	43.2	-31.543	43.2	-16.6125	43.2	-16.5
43.2	34.9063	43.1	99.6828	43.3	60.0602	43.3	-0.98584	43.3	-31.5632	43.3	-16.6406	43.3	-16.5195
43.3	35.7477	43.2	100.28	43.4	60.436	43.4	-0.868652	43.4	-31.5703	43.4	-16.6586	43.4	-16.5586
43.4	36.5898	43.3	100.902	43.5	60.8055	43.5	-0.721069	43.5	-31.575	43.5	-16.6797	43.5	-16.5828
43.5	37.4016	43.4	101.53	43.6	61.1743	43.6	-0.57959	43.6	-31.5703	43.6	-16.7141	43.6	-16.6094
43.6	38.2234	43.5	102.168	43.7	61.5602	43.7	-0.45459	43.7	-31.5641	43.7	-16.7406	43.7	-16.6453
43.7	39.0195	43.6	102.792	43.8	61.9117	43.8	-0.325684	43.8	-31.5579	43.8	-16.7578	43.8	-16.6719
43.8	39.8445	43.7	103.448	43.9	62.2563	43.9	-0.221069	43.9	-31.5554	43.9	-16.7844	43.9	-16.7109
43.9	40.6649	43.8	104.081	44	62.6031	44	-0.106934	44	-31.5554	44	-16.8086	44	-16.7258
44	41.4758	43.9	104.706	44.1	62.9344	44.1	0.0172119	44.1	-31.5508	44.1	-16.8304	44.1	-16.7461
44.1	42.3086	44	105.343	44.2	63.2906	44.2	0.143066	44.2	-31.5797	44.2	-16.8594	44.2	-16.7789
44.2	43.1305	44.1	105.969	44.3	63.611	44.3	0.259399	44.3	-31.582	44.3	-16.8812	44.3	-16.8008
44.3	43.9414	44.2	106.577	44.4	63.9517	44.4	0.369629	44.4	-31.5938	44.4	-16.8984	44.4	-16.8273
44.4	44.7336	44.3	107.227	44.5	64.3274	44.5	0.479736	44.5	-31.6062	44.5	-16.9203	44.5	-16.8477
44.5	45.5391	44.4	107.846	44.6	64.6766	44.6	0.579712	44.6	-31.614	44.6	-16.9375	44.6	-16.8805
44.6	46.3406	44.5	108.472	44.7	65.0337	44.7	0.70166	44.7	-31.6453	44.7	-16.9641	44.7	-16.9102
44.7	47.1602	44.6	109.073	44.8	65.3931	44.8	0.842285	44.8	-31.6687	44.8	-16.9883	44.8	-16.9367
44.8	47.9813	44.7	109.671	44.9	65.7743	44.9	0.946899	44.9	-31.6719	44.9	-17.0101	44.9	-16.9461
44.9	48.7977	44.8	110.261	45	66.1399	45	1.07739	45	-31.6719	45	-17.0273	45	-16.9609
45	49.6047	44.9	110.887	45.1	66.4813	45.1	1.20862	45.1	-31.696	45.1	-17.0656	45.1	-16.9805
45.1	50.4149	45	111.523	45.2	66.8665	45.2	1.33057	45.2	-31.7109	45.2	-17.0898	45.2	-17.0078
45.2	51.2188	45.1	112.147	45.3	67.2079	45.3	1.4563	45.3	-31.7321	45.3	-17.1195	45.3	-17.0391
45.3	52.0359	45.2	112.773	45.4	67.5406	45.4	1.57971	45.4	-31.7375	45.4	-17.1406	45.4	-17.0633
45.4	52.8828	45.3	113.393	45.5	67.9126	45.5	1.71338	45.5	-31.7468	45.5	-17.1703	45.5	-17.0734
45.5	53.6914	45.4	113.997	45.6	68.2399	45.6	1.84924	45.6	-31.7546	45.6	-17.1906	45.6	-17.0977
45.6	54.5	45.5	114.624	45.7	68.5875	45.7	1.98291	45.7	-31.7617	45.7	-17.2188	45.7	-17.1258
45.7	55.3398	45.6	115.23	45.8	68.9211	45.8	2.12817	45.8	-31.7664	45.8	-17.2406	45.8	-17.1484
45.8	56.1453	45.7	115.851	45.9	69.2274	45.9	2.23987	45.9	-31.7539	45.9	-17.2578	45.9	-17.1766
45.9	56.9641	45.8	116.484	46	69.5328	46	2.36572	46	-31.7546	46	-17.2844	46	-17.1867
46	57.782	45.9	117.123	46.1	69.8345	46.1	2.48596	46.1	-31.7617	46.1	-17.3234	46.1	-17.2039
46.1	58.5781	46	117.737	46.2	70.193	46.2	2.62744	46.2	-31.7516	46.2	-17.3594	46.2	-17.2305
46.2	59.4149	46.1	118.339	46.3	70.525	46.3	2.76416	46.3	-31.7305	46.3	-17.389	46.3	-17.25
46.3	60.2188	46.2	118.917	46.4	70.8657	46.4	2.89307	46.4	-31.7585	46.4	-17.3984	46.4	-17.2742
46.4	61.0078	46.3	119.512	46.5	71.2008	46.5	3.02197	46.5	-31.7781	46.5	-17.4328	46.5	-17.2961
46.5	61.7938	46.4	120.152	46.6	71.5328	46.6	3.13831	46.6	-31.7734	46.6	-17.4609	46.6	-17.3086
46.6	62.6211	46.5	120.766	46.7	71.8492	46.7	3.27661	46.7	-31.7422	46.7	-17.4906	46.7	-17.3328
46.7	63.4227	46.6	121.39	46.8	72.1891	46.8	3.42432	46.8	-31.7383	46.8	-17.5078	46.8	-17.3477
46.8	64.2227	46.7	122.016	46.9	72.5094	46.9	3.53674	46.9	-31.7321	46.9	-17.5297	46.9	-17.3789
46.9	65.0313	46.8	122.644	47	72.854	47	3.66724	47	-31.7031	47	-17.5586	47	-17.3953
47	65.825	46.9	123.225	47.1	73.2056	47.1	3.81885	47.1	-31.6914	47.1	-17.5804	47.1	-17.4172
47.1	66.675	47	123.809	47.2	73.5649	47.2	3.95557	47.2	-31.6882	47.2	-17.6094	47.2	-17.4266
47.2	67.4883	47.1	124.433	47.3	73.9117	47.3	4.05713	47.3	-31.6719	47.3	-17.6437	47.3	-17.4492
47.3	68.282	47.2	125.042	47.4	74.2548	47.4	4.18518	47.4	-31.6602	47.4	-17.668	47.4	-17.4688
47.4	69.0977	47.3	125.632	47.5	74.5962	47.5	4.32275	47.5	-31.6422	47.5	-17.6898	47.5	-17.4852
47.5	69.918	47.4	126.222	47.6	74.9313	47.6	4.4563	47.6	-31.6477	47.6	-17.7188	47.6	-17.5117
47.6	70.707	47.5	126.8	47.7	75.2789	47.7	4.58447	47.7	-31.65	47.7	-17.7453	47.7	-17.5266
47.7	71.4883	47.6	127.39	47.8	75.6274	47.8	4.71338	47.8	-31.657	47.8	-17.7679	47.8	-17.5359
47.8	72.282	47.7	127.984	47.9	75.943	47.9	4.84534	47.9	-31.6641	47.9	-17.7891	47.9	-17.5586
47.9	73.0898	47.8	128.569	48	76.2867	48	4.98755	48	-31.6609	48	-17.8203	48	-17.575
48	73.8672	47.9	129.152	48.1	76.6431	48.1	5.13135	48.1	-31.6641	48.1	-17.8304	48.1	-17.5969
48.1	74.6531	48	129.766	48.2	77.025	48.2	5.26416	48.2	-31.6687	48.2	-17.8516	48.2	-17.6172
48.2	75.4102	48.1	130.351	48.3	77.3931	48.3	5.39612	48.3	-31.6758	48.3	-17.8695	48.3	-17.6336
48.3	76.2039	48.2	130.968	48.4	77.7329	48.4	5.52197	48.4	-31.6882	48.4	-17.8906	48.4	-17.6555
48.4	77	48.3	131.585	48.5	78.0845	48.5	5.64307	48.5	-31.7031	48.5	-17.9086	48.5	-17.6797
48.5	77.7938	48.4	132.223	48.6	78.454	48.6	5.76489	48.6	-31.7109	48.6	-17.9375	48.6	-17.7039
48.6	78.5703	48.5	132.816	48.7	78.8079	48.7	5.88831	48.7	-31.7273	48.7	-17.9594	48.7	-17.7188
48.7	79.3594	48.6	133.429	48.8	79.1578	48.8	6.01807	48.8	-31.7273	48.8	-17.9766	48.8	-17.7305
48.8	80.1406	48.7	134.03	48.9	79.5289	48.9	6.14307	48.9	-31.7468	48.9	-18.0031	48.9	-17.75
48.9	80.9422	48.8	134.645	49	79.8813	49	6.24072	49	-31.7688	49	-18.0313	49	-17.7742
49	81.7617	48.9	135.269	49.1	80.2524	49.1	6.34692	49.1	-31.7828	49.1	-18.0492	49.1	-17.8008
49.1	82.5703	49	135.875	49.2	80.6266	49.2	6.45081	49.2	-31.793	49.2	-18.0703	49.2	-17.8156
49.2	83.3594	49.1	136.475	49.3	80.9664	49.3	6.55322	49.3	-31.8093	49.3	-18.0883	49.3	-17.8328
49.3	84.1484	49.2	137.077	49.4	81.3032	49.4	6.65784	49.4	-31.8	49.4	-18.1172	49.4	-17.8594
49.4	84.957	49.3	137.669	49.5	81.6548	49.5	6.77661	49.5	-31.7976	49.5	-18.1406	49.5	-17.8758
49.5	85.743	49.4	138.253	49.6	81.9977	49.6	6.92041	49.6	-31.7891	49.6	-18.1586	49.6	-17.8906
49.6	86.5391	49.5	138.831	49.7	82.3423	49.7	7.05322	49.7	-31.8054	49.7	-18.168	49.7	-17.9297
49.7	87.3281	49.6	139.422	49.8	82.7047	49.8	7.1969	49.8	-31.8125	49.8	-18.1898	49.8	-17.9461
49.8	88.1289	49.7	140.038	49.9	83.0649	49.9	7.31104	49.9	-31.8102	49.9	-18.2109	49.9	-17.9727
49.9	88.918	49.8	140.62	50	83.3961	50	7.41724	50	-31.8125	50	-18.2336	50	-17.9953
50	89.7086	49.9	141.195	50.1	83.7649	50.1	7.55627	50.1	-31.7976	50.1	-18.2601	50.1	-18.0078
50.1	90.4805	50	141.777	50.2	84.111	50.2	7.70947	50.2	-31.8047	50.2	-18.2695	50.2	-18.0359
50.2	91.2617	50.1	142.371	50.3	84.4243	50.3	7.83521	50.3	-31.8125	50.3	-18.2922	50.3	-18.0586
50.3	92.0313	50.2	142.971	50.4	84.7516	50.4	7.9751	50.4	-31.8093	50.4	-18.3234	50.4	-18.0781
50.4	92.8008	50.3	143.579	50.5	85.1071	50.5	8.104	50.5	-31.793	50.5	-18.3398	50.5	-18.1094
50.5	93.5828	50.4	144.187	50.6	85.4517	50.6	8.24768	50.6	-31.8008	50.6	-18.3664	50.6	-18.1258
50.6	94.3789	50.5	144.788	50.7	85.7954	50.7	8.35706	50.7	-31.7781	50.7	-18.4008	50.7	-18.1437
50.7	95.1602	50.6	145.391	50.8	86.1141	50.8	8.48364	50.8	-31.7813	50.8	-18.418	50.8	-18.1609
50.8	95.9383	50.7	145.987	50.9	86.4438	50.9	8.62659	50.9	-31.7742	50.9	-18.4398	50.9	-18.1875
50.9	96.7031	50.8	146.574	51	86.7915	51	8.74536	51	-31.7859	51	-18.4492	51	-18.2188
51	97.4758	50.9	147.174	51.1	87.15	51.1	8.88599	51.1	-31.8008	51.1	-18.4688	51.1	-18.2383
51.1	98.2625	51	147.77	51.2	87.4829	51.2	9.01721	51.2	-31.8054	51.2	-18.4906	51.2	-18.2672
51.2	99.0586	51.1	148.373	51.3	87.8423	51.3	9.13916	51.3	-31.7976	51.3	-18.5031	51.3	-18.3008
51.3	99.8398	51.2	148.956	51.4	88.2017	51.4	9.27197	51.4	-31.8047	51.4	-18.5391	51.4	-18.3203
51.4	100.609	51.3	149.536	51.5	88.5563	51.5	9.42041	51.5	-31.8125	51.5	-18.5492	51.5	-18.3469
51.5	101.379	51.4	150.101	51.6	88.8844	51.6	9.54932	51.6	-31.8093	51.6	-18.5703	51.6	-18.3672
51.6	102.137	51.5	150.672	51.7	89.2524	51.7	9.68213	51.7	-31.8047	51.7	-18.593	51.7	-18.4
51.7	102.915	51.6	151.269	51.8	89.6071	51.8	9.82349	51.8	-31.8125	51.8	-18.6211	51.8	-18.4219
51.8	103.691	51.7	151.834	51.9	89.9634	51.9	9.95166	51.9	-31.8093	51.9	-18.639	51.9	-18.4445
51.9	104.477	51.8	152.41	52	90.311	52	10.0806	52	-31.8093	52	-18.6602	52	-18.4688
52	105.257	51.9	153.004	52.1	90.6626	52.1	10.236	52.1	-31.8047	52.1	-18.6781	52.1	-18.4852
52.1	106.055	52	153.57	52.2	91.0172	52.2	10.3501	52.2	-31.8171	52.2	-18.707	52.2	-18.5078
52.2	106.835	52.1	154.136	52.3	91.3306	52.3	10.4758	52.3	-31.8196	52.3	-18.7289	52.3	-18.5359
52.3	107.614	52.2	154.718	52.4	91.6696	52.4	10.6071	52.4	-31.825	52.4	-18.7625	52.4	-18.5656
52.4	108.391	52.3	155.293	52.5	91.9829	52.5	10.7212	52.5	-31.8203	52.5	-18.7914	52.5	-18.5945
52.5	109.177	52.4	155.879	52.6	92.3063	52.6	10.8423	52.6	-31.8171	52.6	-18.8156	52.6	-18.6289
52.6	109.976	52.5	156.476	52.7	92.6548	52.7	10.9758	52.7	-31.8203	52.7	-18.8312	52.7	-18.6484
52.7	110.77	52.6	157.074	52.8	92.9821	52.8	11.0875	52.8	-31.7976	52.8	-18.8477	52.8	-18.6797
52.8	111.544	52.7	157.652	52.9	93.3032	52.9	11.2212	52.9	-31.8008	52.9	-18.8695	52.9	-18.7039
52.9	112.316	52.8	158.237	53	93.6461	53	11.3547	53	-31.7976	53	-18.8984	53	-18.7305
53	113.087	52.9	158.824	53.1	94.0024	53.1	11.4742	53.1	-31.793	53.1	-18.9203	53.1	-18.7531
53.1	113.863	53	159.383	53.2	94.3375	53.2	11.5774	53.2	-31.8008	53.2	-18.9375	53.2	-18.7625
53.2	114.609	53.1	159.987	53.3	94.6868	53.3	11.6969	53.3	-31.7781	53.3	-18.9609	53.3	-18.7891
53.3	115.352	53.2	160.577	53.4	95.0415	53.4	11.8384	53.4	-31.7703	53.4	-18.9789	53.4	-18.8055
53.4	116.106	53.3	161.155	53.5	95.3813	53.5	11.9446	53.5	-31.7734	53.5	-19.0031	53.5	-18.8273
53.5	116.883	53.4	161.715	53.6	95.7509	53.6	12.0852	53.6	-31.7585	53.6	-19.0391	53.6	-18.8445
53.6	117.655	53.5	162.284	53.7	96.1047	53.7	12.2134	53.7	-31.7539	53.7	-19.0656	53.7	-18.8594
53.7	118.395	53.6	162.871	53.8	96.4664	53.8	12.3258	53.8	-31.7422	53.8	-19.0898	53.8	-18.8906
53.8	119.136	53.7	163.445	53.9	96.8141	53.9	12.4595	53.9	-31.739	53.9	-19.1	53.9	-18.9102
53.9	119.903	53.8	163.995	54	97.1587	54	12.5728	54	-31.739	54	-19.1211	54	-18.918
54	120.657	53.9	164.582	54.1	97.4829	54.1	12.6868	54.1	-31.7297	54.1	-19.139	54.1	-18.9461
54.1	121.437	54	165.172	54.2	97.7867	54.2	12.8032	54.2	-31.7438	54.2	-19.1602	54.2	-18.9688
54.2	122.18	54.1	165.76	54.3	98.1118	54.3	12.9352	54.3	-31.7415	54.3	-19.1781	54.3	-19.0031
54.3	122.949	54.2	166.337	54.4	98.4469	54.4	13.0657	54.4	-31.7468	54.4	-19.1992	54.4	-19.0242
54.4	123.716	54.3	166.917	54.5	98.7493	54.5	13.1969	54.5	-31.7422	54.5	-19.2219	54.5	-19.0508
54.5	124.476	54.4	167.527	54.6	99.0485	54.6	13.3547	54.6	-31.7351	54.6	-19.2617	54.6	-19.0672
54.6	125.235	54.5	168.134	54.7	99.3735	54.7	13.4547	54.7	-31.7468	54.7	-19.2797	54.7	-19.0851
54.7	125.995	54.6	168.737	54.8	99.6821	54.8	13.5735	54.8	-31.7468	54.8	-19.3008	54.8	-19.1063
54.8	126.755	54.7	169.324	54.9	99.986	54.9	13.7095	54.9	-31.7734	54.9	-19.3187	54.9	-19.1242
54.9	127.536	54.8	169.894	55	100.295	55	13.8157	55	-31.7852	55	-19.3351	55	-19.1453
55	128.288	54.9	170.484	55.1	100.616	55.1	13.9352	55.1	-31.7859	55.1	-19.343	55.1	-19.175
55.1	129.036	55	171.058	55.2	100.959	55.2	14.061	55.2	-31.8125	55.2	-19.3672	55.2	-19.1961
55.2	129.793	55.1	171.613	55.3	101.287	55.3	14.1868	55.3	-31.8171	55.3	-19.389	55.3	-19.2156
55.3	130.546	55.2	172.191	55.4	101.604	55.4	14.3188	55.4	-31.8367	55.4	-19.4149	55.4	-19.2453
55.4	131.294	55.3	172.757	55.5	101.944	55.5	14.4758	55.5	-31.8484	55.5	-19.4398	55.5	-19.2664
55.5	132.043	55.4	173.32	55.6	102.267	55.6	14.568	55.6	-31.8633	55.6	-19.4719	55.6	-19.2844
55.6	132.809	55.5	173.875	55.7	102.6	55.7	14.7141	55.7	-31.8679	55.7	-19.4953	55.7	-19.3055
55.7	133.563	55.6	174.441	55.8	102.932	55.8	14.8649	55.8	-31.8633	55.8	-19.5078	55.8	-19.3281
55.8	134.304	55.7	174.976	55.9	103.267	55.9	14.9954	55.9	-31.8406	55.9	-19.5297	55.9	-19.3516
55.9	135.055	55.8	175.551	56	103.592	56	15.1071	56	-31.8242	56	-19.5391	56	-19.3594
56	135.825	55.9	176.121	56.1	103.932	56.1	15.2727	56.1	-31.8196	56.1	-19.5586	56.1	-19.3875
56.1	136.597	56	176.726	56.2	104.252	56.2	15.4399	56.2	-31.8171	56.2	-19.5804	56.2	-19.4055
56.2	137.337	56.1	177.305	56.3	104.552	56.3	15.5657	56.3	-31.8008	56.3	-19.5851	56.3	-19.4344
56.3	138.102	56.2	177.886	56.4	104.902	56.4	15.729	56.4	-31.8093	56.4	-19.6125	56.4	-19.4445
56.4	138.832	56.3	178.476	56.5	105.252	56.5	15.8649	56.5	-31.8008	56.5	-19.6289	56.5	-19.4656
56.5	139.597	56.4	179.07	56.6	105.607	56.6	15.9954	56.6	-31.8171	56.6	-19.6555	56.6	-19.4953
56.6	140.345	56.5	179.664	56.7	105.94	56.7	16.1313	56.7	-31.8093	56.7	-19.675	56.7	-19.5094
56.7	141.087	56.6	180.226	56.8	106.279	56.8	16.2555	56.8	-31.7969	56.8	-19.6898	56.8	-19.5344
56.8	141.847	56.7	180.801	56.9	106.581	56.9	16.3789	56.9	-31.7656	56.9	-19.707	56.9	-19.5555
56.9	142.606	56.8	181.371	57	106.936	57	16.5493	57	-31.7461	57	-19.7258	57	-19.5656
57	143.375	56.9	181.925	57.1	107.296	57.1	16.7258	57.1	-31.7227	57.1	-19.7305	57.1	-19.575
57.1	144.105	57	182.507	57.2	107.654	57.2	16.8649	57.2	-31.7078	57.2	-19.7484	57.2	-19.5734
57.2	144.845	57.1	183.055	57.3	108.002	57.3	16.9836	57.3	-31.6914	57.3	-19.7648	57.3	-19.5945
57.3	145.597	57.2	183.624	57.4	108.341	57.4	17.1196	57.4	-31.7031	57.4	-19.7813	57.4	-19.6164
57.4	146.313	57.3	184.198	57.5	108.706	57.5	17.2375	57.5	-31.7	57.5	-19.7992	57.5	-19.6336
57.5	147.09	57.4	184.731	57.6	109.037	57.6	17.3453	57.6	-31.6953	57.6	-19.8203	57.6	-19.6523
57.6	147.856	57.5	185.286	57.7	109.363	57.7	17.4712	57.7	-31.6882	57.7	-19.8351	57.7	-19.6649
57.7	148.597	57.6	185.866	57.8	109.724	57.8	17.5884	57.8	-31.6914	57.8	-19.8547	57.8	-19.6867
57.8	149.356	57.7	186.445	57.9	110.061	57.9	17.6899	57.9	-31.7	57.9	-19.889	57.9	-19.7039
57.9	150.105	57.8	186.995	58	110.394	58	17.8188	58	-31.6985	58	-19.8937	58	-19.7258
58	150.856	57.9	187.575	58.1	110.709	58.1	17.9368	58.1	-31.6882	58.1	-19.9102	58.1	-19.7469
58.1	151.605	58	188.155	58.2	111.049	58.2	18.0383	58.2	-31.6836	58.2	-19.925	58.2	-19.7648
58.2	152.337	58.1	188.723	58.3	111.393	58.3	18.1431	58.3	-31.693	58.3	-19.9367	58.3	-19.7938
58.3	153.085	58.2	189.296	58.4	111.733	58.4	18.2789	58.4	-31.6907	58.4	-19.9492	58.4	-19.8086
58.4	153.845	58.3	189.859	58.5	112.056	58.5	18.4055	58.5	-31.6735	58.5	-19.9711	58.5	-19.8367
58.5	154.595	58.4	190.425	58.6	112.381	58.6	18.561	58.6	-31.6758	58.6	-19.9836	58.6	-19.8547
58.6	155.327	58.5	191.008	58.7	112.714	58.7	18.6899	58.7	-31.6641	58.7	-20	58.7	-19.8711
58.7	156.075	58.6	191.59	58.8	113.076	58.8	18.8258	58.8	-31.6719	58.8	-20.0101	58.8	-19.8789
58.8	156.805	58.7	192.141	58.9	113.416	58.9	18.9563	58.9	-31.6687	58.9	-20.0273	58.9	-19.8984
58.9	157.546	58.8	192.695	59	113.753	59	19.0969	59	-31.6765	59	-20.0461	59	-19.9031
59	158.294	58.9	193.266	59.1	114.092	59.1	19.2164	59.1	-31.6836	59.1	-20.0539	59.1	-19.925
59.1	159.051	59	193.823	59.2	114.432	59.2	19.3384	59.2	-31.6882	59.2	-20.082	59.2	-19.9344
59.2	159.817	59.1	194.359	59.3	114.759	59.3	19.4836	59.3	-31.6836	59.3	-20.0922	59.3	-19.9414
59.3	160.585	59.2	194.902	59.4	115.061	59.4	19.6313	59.4	-31.6719	59.4	-20.1094	59.4	-19.9609
59.4	161.32	59.3	195.453	59.5	115.401	59.5	19.7571	59.5	-31.6765	59.5	-20.1312	59.5	-19.9852
59.5	162.055	59.4	195.999	59.6	115.745	59.6	19.8766	59.6	-31.6719	59.6	-20.1484	59.6	-19.9953
59.6	162.816	59.5	196.527	59.7	116.08	59.7	19.9758	59.7	-31.6914	59.7	-20.1672	59.7	-20.0195
59.7	163.555	59.6	197.079	59.8	116.404	59.8	20.0953	59.8	-31.6813	59.8	-20.1781	59.8	-20.0359
59.8	164.296	59.7	197.609	59.9	116.726	59.9	20.2095	59.9	-31.6907	59.9	-20.1992	59.9	-20.0461
59.9	165.044	59.8	198.163	60	117.056	60	20.3477	60	-31.693	60	-20.2172	60	-20.0555
60	165.796	59.9	198.719	60.1	117.386	60.1	20.5055	60.1	-31.6985	60.1	-20.2383	60.1	-20.0781
60.1	166.536	60	199.265	60.2	117.731	60.2	20.636	60.2	-31.7078	60.2	-20.2617	60.2	-20.0898
60.2	167.278	60.1	199.809	60.3	118.057	60.3	20.7516	60.3	-31.7	60.3	-20.2797	60.3	-20.0945
60.3	168.015	60.2	200.366	60.4	118.397	60.4	20.8867	60.4	-31.7031	60.4	-20.3086	60.4	-20.1164
60.4	168.73	60.3	200.918	60.5	118.737	60.5	21.0133	60.5	-31.7195	60.5	-20.3304	60.5	-20.1258
60.5	169.469	60.4	201.461	60.6	119.049	60.6	21.1438	60.6	-31.7297	60.6	-20.3477	60.6	-20.1406
60.6	170.223	60.5	202.024	60.7	119.377	60.7	21.2798	60.7	-31.7344	60.7	-20.3781	60.7	-20.1437
60.7	170.966	60.6	202.592	60.8	119.729	60.8	21.4055	60.8	-31.739	60.8	-20.3937	60.8	-20.1649
60.8	171.723	60.7	203.129	60.9	120.077	60.9	21.5415	60.9	-31.7422	60.9	-20.425	60.9	-20.1797
60.9	172.476	60.8	203.667	61	120.408	61	21.6509	61	-31.7468	61	-20.4398	61	-20.1875
61	173.247	60.9	204.164	61.1	120.756	61.1	21.7524	61.1	-31.7585	61.1	-20.457	61.1	-20.2156
61.1	173.995	61	204.699	61.2	121.115	61.2	21.8649	61.2	-31.761	61.2	-20.4805	61.2	-20.2258
61.2	174.755	61.1	205.262	61.3	121.448	61.3	22.0032	61.3	-31.7664	61.3	-20.4906	61.3	-20.2422
61.3	175.505	61.2	205.796	61.4	121.796	61.4	22.136	61.4	-31.7703	61.4	-20.5195	61.4	-20.25
61.4	176.265	61.3	206.324	61.5	122.139	61.5	22.2672	61.5	-31.7773	61.5	-20.5414	61.5	-20.2695
61.5	177.016	61.4	206.847	61.6	122.51	61.6	22.3813	61.6	-31.7656	61.6	-20.5586	61.6	-20.2938
61.6	177.754	61.5	207.395	61.7	122.865	61.7	22.5071	61.7	-31.7539	61.7	-20.5804	61.7	-20.3203
61.7	178.492	61.6	207.93	61.8	123.198	61.8	22.6321	61.8	-31.7585	61.8	-20.5977	61.8	-20.3351
61.8	179.214	61.7	208.487	61.9	123.549	61.9	22.7993	61.9	-31.7493	61.9	-20.6211	61.9	-20.3445
61.9	179.934	61.8	209.02	62	123.901	62	22.9625	62	-31.7422	62	-20.6312	62	-20.3594
62	180.672	61.9	209.57	62.1	124.26	62.1	23.0969	62.1	-31.736	62.1	-20.6484	62.1	-20.3953
62.1	181.374	62	210.144	62.2	124.592	62.2	23.2336	62.2	-31.718	62.2	-20.675	62.2	-20.4055
62.2	182.102	62.1	210.696	62.3	124.924	62.3	23.3844	62.3	-31.7117	62.3	-20.6781	62.3	-20.4266
62.3	182.813	62.2	211.245	62.4	125.255	62.4	23.5071	62.4	-31.6868	62.4	-20.6945	62.4	-20.4367
62.4	183.551	62.3	211.813	62.5	125.588	62.5	23.6431	62.5	-31.6852	62.5	-20.6992	62.5	-20.4539
62.5	184.25	62.4	212.389	62.6	125.901	62.6	23.772	62.6	-31.6711	62.6	-20.718	62.6	-20.4641
62.6	185.005	62.5	212.966	62.7	126.209	62.7	23.9087	62.7	-31.6641	62.7	-20.7258	62.7	-20.4852
62.7	185.742	62.6	213.527	62.8	126.534	62.8	24.0493	62.8	-31.6328	62.8	-20.7406	62.8	-20.5047
62.8	186.476	62.7	214.067	62.9	126.854	62.9	24.175	62.9	-31.6149	62.9	-20.7531	62.9	-20.5266
62.9	187.242	62.8	214.605	63	127.158	63	24.275	63	-31.6172	63	-20.7648	63	-20.5555
63	187.992	62.9	215.16	63.1	127.479	63.1	24.3938	63.1	-31.5859	63.1	-20.7726	63.1	-20.5656
63.1	188.755	63	215.699	63.2	127.799	63.2	24.525	63.2	-31.5547	63.2	-20.7773	63.2	-20.5867
63.2	189.523	63.1	216.262	63.3	128.139	63.3	24.6633	63.3	-31.5398	63.3	-20.7961	63.3	-20.6016
63.3	190.262	63.2	216.812	63.4	128.471	63.4	24.7798	63.4	-31.5273	63.4	-20.8078	63.4	-20.6289
63.4	191.027	63.3	217.352	63.5	128.802	63.5	24.8938	63.5	-31.5039	63.5	-20.8187	63.5	-20.6555
63.5	191.781	63.4	217.91	63.6	129.152	63.6	25.0055	63.6	-31.4844	63.6	-20.8477	63.6	-20.6797
63.6	192.539	63.5	218.469	63.7	129.495	63.7	25.1165	63.7	-31.4695	63.7	-20.8664	63.7	-20.6969
63.7	193.281	63.6	219.031	63.8	129.826	63.8	25.2477	63.8	-31.4648	63.8	-20.8789	63.8	-20.7258
63.8	194.016	63.7	219.578	63.9	130.151	63.9	25.3625	63.9	-31.4414	63.9	-20.8976	63.9	-20.7547
63.9	194.773	63.8	220.136	64	130.482	64	25.5149	64	-31.4336	64	-20.9086	64	-20.7766
64	195.504	63.9	220.688	64.1	130.819	64.1	25.6509	64.1	-31.4382	64.1	-20.925	64.1	-20.7891
64.1	196.234	64	221.25	64.2	131.156	64.2	25.7603	64.2	-31.4211	64.2	-20.9367	64.2	-20.8055
64.2	196.941	64.1	221.796	64.3	131.478	64.3	25.9087	64.3	-31.3961	64.3	-20.9445	64.3	-20.8203
64.3	197.652	64.2	222.336	64.4	131.804	64.4	26.0415	64.4	-31.3704	64.4	-20.9562	64.4	-20.8351
64.4	198.371	64.3	222.868	64.5	132.149	64.5	26.1633	64.5	-31.3555	64.5	-20.9641	64.5	-20.8641
64.5	199.094	64.4	223.413	64.6	132.464	64.6	26.2993	64.6	-31.3367	64.6	-20.9688	64.6	-20.8789
64.6	199.796	64.5	223.941	64.7	132.787	64.7	26.4399	64.7	-31.3242	64.7	-20.9789	64.7	-20.9149
64.7	200.52	64.6	224.434	64.8	133.105	64.8	26.5884	64.8	-31.3125	64.8	-20.9953	64.8	-20.9367
64.8	201.25	64.7	224.953	64.9	133.455	64.9	26.707	64.9	-31.3093	64.9	-21.0031	64.9	-20.9539
64.9	201.997	64.8	225.473	65	133.775	65	26.8453	65	-31.2976	65	-21.0078	65	-20.9805
65	202.711	64.9	225.987	65.1	134.108	65.1	26.9446	65.1	-31.3	65.1	-21.0266	65.1	-21.0148
65.1	203.422	65	226.52	65.2	134.409	65.2	27.0641	65.2	-31.293	65.2	-21.0422	65.2	-21.0359
65.2	204.164	65.1	227.031	65.3	134.729	65.3	27.1907	65.3	-31.2859	65.3	-21.0656	65.3	-21.0555
65.3	204.902	65.2	227.543	65.4	135.054	65.4	27.3157	65.4	-31.293	65.4	-21.0687	65.4	-21.0851
65.4	205.652	65.3	228.098	65.5	135.369	65.5	27.4282	65.5	-31.2946	65.5	-21.0898	65.5	-21.1063
65.5	206.383	65.4	228.655	65.6	135.678	65.6	27.5657	65.6	-31.3	65.6	-21.1047	65.6	-21.1164
65.6	207.113	65.5	229.175	65.7	136.01	65.7	27.6978	65.7	-31.293	65.7	-21.1211	65.7	-21.1336
65.7	207.852	65.6	229.723	65.8	136.363	65.8	27.8384	65.8	-31.2906	65.8	-21.139	65.8	-21.1633
65.8	208.582	65.7	230.289	65.9	136.733	65.9	27.9517	65.9	-31.3047	65.9	-21.1602	65.9	-21.1844
65.9	209.293	65.8	230.835	66	137.064	66	28.0735	66	-31.3093	66	-21.175	66	-21.2109
66	210.004	65.9	231.364	66.1	137.436	66.1	28.1969	66.1	-31.3	66.1	-21.1898	66.1	-21.2227
66.1	210.73	66	231.917	66.2	137.765	66.2	28.3157	66.2	-31.293	66.2	-21.2141	66.2	-21.2352
66.2	211.453	66.1	232.445	66.3	138.115	66.3	28.4172	66.3	-31.2946	66.3	-21.2305	66.3	-21.257
66.3	212.184	66.2	232.977	66.4	138.445	66.4	28.5289	66.4	-31.3047	66.4	-21.2406	66.4	-21.2664
66.4	212.883	66.3	233.507	66.5	138.78	66.5	28.647	66.5	-31.3079	66.5	-21.2578	66.5	-21.2844
66.5	213.597	66.4	234.051	66.6	139.142	66.6	28.7727	66.6	-31.3054	66.6	-21.2813	66.6	-21.3008
66.6	214.301	66.5	234.573	66.7	139.499	66.7	28.897	66.7	-31.3171	66.7	-21.3078	66.7	-21.3133
66.7	215.016	66.6	235.117	66.8	139.843	66.8	29.0344	66.8	-31.3242	66.8	-21.3304	66.8	-21.3281
66.8	215.742	66.7	235.648	66.9	140.158	66.9	29.1392	66.9	-31.3171	66.9	-21.3469	66.9	-21.3563
66.9	216.473	66.8	236.188	67	140.445	67	29.2915	67	-31.3125	67	-21.3594	67	-21.3781
67	217.203	66.9	236.707	67.1	140.772	67.1	29.4165	67.1	-31.2976	67.1	-21.389	67.1	-21.3953
67.1	217.934	67	237.247	67.2	141.076	67.2	29.5618	67.2	-31.3	67.2	-21.4133	67.2	-21.4055
67.2	218.652	67.1	237.777	67.3	141.384	67.3	29.7368	67.3	-31.2946	67.3	-21.4297	67.3	-21.4266
67.3	219.378	67.2	238.304	67.4	141.727	67.4	29.9087	67.4	-31.2688	67.4	-21.4594	67.4	-21.4492
67.4	220.07	67.3	238.829	67.5	142.045	67.5	30.0422	67.5	-31.2664	67.5	-21.4805	67.5	-21.4641
67.5	220.786	67.4	239.367	67.6	142.35	67.6	30.1899	67.6	-31.2585	67.6	-21.5101	67.6	-21.4852
67.6	221.499	67.5	239.874	67.7	142.663	67.7	30.3547	67.7	-31.2461	67.7	-21.5273	67.7	-21.4922
67.7	222.211	67.6	240.398	67.8	142.971	67.8	30.5103	67.8	-31.2344	67.8	-21.5508	67.8	-21.5
67.8	222.922	67.7	240.918	67.9	143.295	67.9	30.6392	67.9	-31.239	67.9	-21.5687	67.9	-21.5242
67.9	223.63	67.8	241.441	68	143.596	68	30.7844	68	-31.2297	68	-21.5898	68	-21.5461
68	224.344	67.9	241.941	68.1	143.925	68.1	30.9204	68.1	-31.2273	68.1	-21.6086	68.1	-21.5508
68.1	225.074	68	242.453	68.2	144.255	68.2	31.0461	68.2	-31.2344	68.2	-21.6195	68.2	-21.5555
68.2	225.793	68.1	242.961	68.3	144.569	68.3	31.1704	68.3	-31.2195	68.3	-21.6406	68.3	-21.5734
68.3	226.519	68.2	243.456	68.4	144.917	68.4	31.275	68.4	-31.2148	68.4	-21.6586	68.4	-21.5945
68.4	227.242	68.3	243.945	68.5	145.241	68.5	31.4133	68.5	-31.2117	68.5	-21.6797	68.5	-21.6016
68.5	227.992	68.4	244.466	68.6	145.569	68.6	31.5657	68.6	-31.2102	68.6	-21.6976	68.6	-21.6094
68.6	228.723	68.5	244.995	68.7	145.881	68.7	31.6852	68.7	-31.2031	68.7	-21.7188	68.7	-21.6289
68.7	229.437	68.6	245.503	68.8	146.185	68.8	31.8118	68.8	-31.1882	68.8	-21.7453	68.8	-21.6453
68.8	230.16	68.7	246.027	68.9	146.476	68.9	31.9407	68.9	-31.2	68.9	-21.757	68.9	-21.6672
68.9	230.888	68.8	246.559	69	146.802	69	32.1001	69	-31.1953	69	-21.7695	69	-21.6766
69	231.613	68.9	247.055	69.1	147.127	69.1	32.2173	69.1	-31.1985	69.1	-21.7914	69.1	-21.6914
69.1	232.313	69	247.577	69.2	147.428	69.2	32.3313	69.2	-31.1804	69.2	-21.8086	69.2	-21.6992
69.2	233.031	69.1	248.109	69.3	147.741	69.3	32.479	69.3	-31.1836	69.3	-21.8304	69.3	-21.7227
69.3	233.757	69.2	248.641	69.4	148.049	69.4	32.6079	69.4	-31.1641	69.4	-21.8351	69.4	-21.7352
69.4	234.469	69.3	249.148	69.5	148.355	69.5	32.7383	69.5	-31.157	69.5	-21.8477	69.5	-21.757
69.5	235.191	69.4	249.687	69.6	148.651	69.6	32.8696	69.6	-31.1641	69.6	-21.8664	69.6	-21.7664
69.6	235.891	69.5	250.219	69.7	148.963	69.7	33.0024	69.7	-31.1523	69.7	-21.8773	69.7	-21.7766
69.7	236.587	69.6	250.714	69.8	149.28	69.8	33.1274	69.8	-31.1492	69.8	-21.8984	69.8	-21.7938
69.8	237.313	69.7	251.223	69.9	149.593	69.9	33.2727	69.9	-31.1523	69.9	-21.9055	69.9	-21.8156
69.9	238.031	69.8	251.726	70	149.923	70	33.3961	70	-31.1445	70	-21.9172	70	-21.825
70	238.757	69.9	252.247	70.1	150.217	70.1	33.4758	70.1	-31.1375	70.1	-21.9219	70.1	-21.843
70.1	239.489	70	252.77	70.2	150.542	70.2	33.6001	70.2	-31.1445	70.2	-21.9367	70.2	-21.8524
70.2	240.21	70.1	253.316	70.3	150.884	70.3	33.7336	70.3	-31.125	70.3	-21.9515	70.3	-21.8758
70.3	240.93	70.2	253.843	70.4	151.195	70.4	33.8384	70.4	-31.1101	70.4	-21.9641	70.4	-21.8859
70.4	241.636	70.3	254.36	70.5	151.518	70.5	33.979	70.5	-31.1055	70.5	-21.9805	70.5	-21.8953
70.5	242.337	70.4	254.902	70.6	151.85	70.6	34.1125	70.6	-31.1016	70.6	-21.9953	70.6	-21.9055
70.6	243.063	70.5	255.423	70.7	152.173	70.7	34.2407	70.7	-31.1023	70.7	-22.0101	70.7	-21.9266
70.7	243.801	70.6	255.952	70.8	152.503	70.8	34.3665	70.8	-31.0774	70.8	-22.0266	70.8	-21.9492
70.8	244.538	70.7	256.498	70.9	152.822	70.9	34.5024	70.9	-31.0758	70.9	-22.0266	70.9	-21.9688
70.9	245.247	70.8	257.054	71	153.137	71	34.6196	71	-31.0696	71	-22.0391	71	-21.9969
71	245.968	70.9	257.57	71.1	153.471	71.1	34.7438	71.1	-31.0625	71.1	-22.0461	71.1	-22.007
71.1	246.68	71	258.075	71.2	153.779	71.2	34.9016	71.2	-31.0476	71.2	-22.0609	71.2	-22.0242
71.2	247.388	71.1	258.569	71.3	154.084	71.3	35.054	71.3	-31.043	71.3	-22.0734	71.3	-22.043
71.3	248.109	71.2	259.07	71.4	154.394	71.4	35.1821	71.4	-31.0352	71.4	-22.0898	71.4	-22.0461
71.4	248.832	71.3	259.551	71.5	154.721	71.5	35.304	71.5	-31.0234	71.5	-22.0969	71.5	-22.0633
71.5	249.548	71.4	260.039	71.6	155.052	71.6	35.4469	71.6	-31.0085	71.6	-22.1195	71.6	-22.0734
71.6	250.257	71.5	260.551	71.7	155.374	71.7	35.5735	71.7	-31.0203	71.7	-22.1289	71.7	-22.0945
71.7	250.948	71.6	261.039	71.8	155.673	71.8	35.6852	71.8	-31.0039	71.8	-22.1484	71.8	-22.1211
71.8	251.66	71.7	261.534	71.9	155.967	71.9	35.8118	71.9	-30.9961	71.9	-22.1586	71.9	-22.1453
71.9	252.368	71.8	262.027	72	156.281	72	35.9478	72	-30.9812	72	-22.1797	72	-22.1555
72	253.077	71.9	262.508	72.1	156.62	72.1	36.0664	72.1	-30.9602	72.1	-22.2015	72.1	-22.1649
72.1	253.778	72	263.024	72.2	156.928	72.2	36.2047	72.2	-30.9453	72.2	-22.2062	72.2	-22.1914
72.2	254.504	72.1	263.52	72.3	157.261	72.3	36.3071	72.3	-30.9382	72.3	-22.2188	72.3	-22.2109
72.3	255.23	72.2	264.034	72.4	157.581	72.4	36.4524	72.4	-30.9258	72.4	-22.2453	72.4	-22.2305
72.4	255.93	72.3	264.513	72.5	157.904	72.5	36.593	72.5	-30.9141	72.5	-22.2484	72.5	-22.2422
72.5	256.638	72.4	265.02	72.6	158.217	72.6	36.7251	72.6	-30.8945	72.6	-22.2648	72.6	-22.25
72.6	257.332	72.5	265.534	72.7	158.527	72.7	36.8579	72.7	-30.8961	72.7	-22.2773	72.7	-22.2742
72.7	258.038	72.6	266.044	72.8	158.861	72.8	36.9836	72.8	-30.8867	72.8	-22.2961	72.8	-22.3008
72.8	258.762	72.7	266.554	72.9	159.206	72.9	37.093	72.9	-30.8672	72.9	-22.307	72.9	-22.3203
72.9	259.453	72.8	267.078	73	159.542	73	37.2368	73	-30.8555	73	-22.3281	73	-22.332
73	260.16	72.9	267.59	73.1	159.884	73.1	37.3821	73.1	-30.8438	73.1	-22.3469	73.1	-22.3469
73.1	260.863	73	268.102	73.2	160.186	73.2	37.5376	73.2	-30.8484	73.2	-22.3547	73.2	-22.3641
73.2	261.546	73.1	268.612	73.3	160.496	73.3	37.6555	73.3	-30.8477	73.3	-22.3547	73.3	-22.3906
73.3	262.239	73.2	269.129	73.4	160.819	73.4	37.7798	73.4	-30.8359	73.4	-22.3664	73.4	-22.4149
73.4	262.929	73.3	269.622	73.5	161.13	73.5	37.9133	73.5	-30.8242	73.5	-22.3789	73.5	-22.425
73.5	263.633	73.4	270.144	73.6	161.448	73.6	38.0446	73.6	-30.8047	73.6	-22.3976	73.6	-22.4461
73.6	264.348	73.5	270.653	73.7	161.776	73.7	38.168	73.7	-30.7976	73.7	-22.4055	73.7	-22.4641
73.7	265.077	73.6	271.136	73.8	162.105	73.8	38.3063	73.8	-30.8047	73.8	-22.4203	73.8	-22.4852
73.8	265.801	73.7	271.634	73.9	162.428	73.9	38.4133	73.9	-30.7852	73.9	-22.4367	73.9	-22.5195
73.9	266.504	73.8	272.152	74	162.744	74	38.5618	74	-30.7898	74	-22.4492	74	-22.5359
74	267.211	73.9	272.677	74.1	163.049	74.1	38.7047	74.1	-30.7656	74.1	-22.4758	74.1	-22.5656
74.1	267.914	74	273.163	74.2	163.343	74.2	38.8313	74.2	-30.7539	74.2	-22.4789	74.2	-22.582
74.2	268.628	74.1	273.648	74.3	163.654	74.3	38.9321	74.3	-30.7461	74.3	-22.4953	74.3	-22.5977
74.3	269.332	74.2	274.148	74.4	163.999	74.4	39.0454	74.4	-30.7468	74.4	-22.4953	74.4	-22.6258
74.4	270.043	74.3	274.668	74.5	164.335	74.5	39.1907	74.5	-30.7461	74.5	-22.5078	74.5	-22.6437
74.5	270.727	74.4	275.175	74.6	164.654	74.6	39.3267	74.6	-30.7461	74.6	-22.5266	74.6	-22.6531
74.6	271.436	74.5	275.688	74.7	164.967	74.7	39.4524	74.7	-30.7344	74.7	-22.5375	74.7	-22.6719
74.7	272.106	74.6	276.207	74.8	165.284	74.8	39.5758	74.8	-30.7227	74.8	-22.5539	74.8	-22.6914
74.8	272.796	74.7	276.723	74.9	165.588	74.9	39.675	74.9	-30.7195	74.9	-22.5586	74.9	-22.7109
74.9	273.497	74.8	277.241	75	165.884	75	39.7798	75	-30.7031	75	-22.5773	75	-22.7188
75	274.198	74.9	277.766	75.1	166.21	75.1	39.8743	75.1	-30.6953	75.1	-22.5851	75.1	-22.75
75.1	274.888	75	278.27	75.2	166.538	75.2	39.9719	75.2	-30.7	75.2	-22.6016	75.2	-22.7617
75.2	275.57	75.1	278.773	75.3	166.838	75.3	40.1031	75.3	-30.6953	75.3	-22.6164	75.3	-22.7664
75.3	276.223	75.2	279.313	75.4	167.147	75.4	40.2407	75.4	-30.6758	75.4	-22.6195	75.4	-22.7961
75.4	276.905	75.3	279.831	75.5	167.433	75.5	40.3477	75.5	-30.6641	75.5	-22.6359	75.5	-22.8133
75.5	277.598	75.4	280.34	75.6	167.749	75.6	40.4547	75.6	-30.6523	75.6	-22.6359	75.6	-22.832
75.6	278.288	75.5	280.845	75.7	168.049	75.7	40.5735	75.7	-30.6523	75.7	-22.6484	75.7	-22.8469
75.7	278.98	75.6	281.32	75.8	168.35	75.8	40.7219	75.8	-30.6492	75.8	-22.6703	75.8	-22.8641
75.8	279.688	75.7	281.801	75.9	168.659	75.9	40.8531	75.9	-30.6445	75.9	-22.6797	75.9	-22.8742
75.9	280.378	75.8	282.284	76	168.955	76	40.9993	76	-30.6492	76	-22.6945	76	-22.9031
76	281.051	75.9	282.758	76.1	169.27	76.1	41.1563	76.1	-30.6445	76.1	-22.7094	76.1	-22.9219
76.1	281.747	76	283.231	76.2	169.569	76.2	41.3141	76.2	-30.6375	76.2	-22.7188	76.2	-22.9266
76.2	282.429	76.1	283.691	76.3	169.889	76.3	41.4719	76.3	-30.625	76.3	-22.7375	76.3	-22.9531
76.3	283.136	76.2	284.173	76.4	170.206	76.4	41.6196	76.4	-30.625	76.4	-22.7531	76.4	-22.9562
76.4	283.837	76.3	284.634	76.5	170.53	76.5	41.7485	76.5	-30.6179	76.5	-22.7648	76.5	-22.9805
76.5	284.551	76.4	285.1	76.6	170.831	76.6	41.8938	76.6	-30.625	76.6	-22.7766	76.6	-22.9805
76.6	285.254	76.5	285.591	76.7	171.108	76.7	42.0063	76.7	-30.6204	76.7	-22.7813	76.7	-22.9969
76.7	285.953	76.6	286.106	76.8	171.406	76.8	42.1243	76.8	-30.6179	76.8	-22.7961	76.8	-23.0148
76.8	286.648	76.7	286.598	76.9	171.724	76.9	42.2454	76.9	-30.6179	76.9	-22.7992	76.9	-23.0313
76.9	287.324	76.8	287.102	77	172.034	77	42.3813	77	-30.6133	77	-22.8156	77	-23.0359
77	288.004	76.9	287.586	77.1	172.357	77.1	42.5103	77.1	-30.6101	77.1	-22.8281	77.1	-23.0539
77.1	288.691	77	288.086	77.2	172.656	77.2	42.6392	77.2	-30.6172	77.2	-22.8422	77.2	-23.0703
77.2	289.398	77.1	288.585	77.3	172.952	77.3	42.7336	77.3	-30.6204	77.3	-22.8516	77.3	-23.0828
77.3	290.106	77.2	289.071	77.4	173.241	77.4	42.8579	77.4	-30.6149	77.4	-22.8617	77.4	-23.0945
77.4	290.777	77.3	289.546	77.5	173.549	77.5	42.9868	77.5	-30.6086	77.5	-22.8742	77.5	-23.1133
77.5	291.458	77.4	290.016	77.6	173.865	77.6	43.2415	77.6	-30.6055	77.6	-22.8742	77.6	-23.1164
77.6	292.116	77.5	290.495	77.7	174.198	77.7	43.4087	77.7	-30.5984	77.7	-22.8906	77.7	-23.1375
77.7	292.798	77.6	290.984	77.8	174.562	77.8	43.5422	77.8	-30.5938	77.8	-22.9008	77.8	-23.1555
77.8	293.48	77.7	291.449	77.9	174.892	77.9	43.6079	77.9	-30.5938	77.9	-22.9297	77.9	-23.1766
77.9	294.164	77.8	291.911	78	175.214	78	43.6438	78	-30.5938	78	-22.9398	78	-23.1914
78	294.827	77.9	292.391	78.1	175.533	78.1	43.7563	78.1	-30.5789	78.1	-22.9523	78.1	-23.1945
78.1	295.497	78	292.891	78.2	175.846	78.2	43.9009	78.2	-30.571	78.2	-22.9688	78.2	-23.2156
78.2	296.184	78.1	293.362	78.3	176.176	78.3	44.0376	78.3	-30.55	78.3	-22.9953	78.3	-23.2305
78.3	296.859	78.2	293.825	78.4	176.513	78.4	44.1274	78.4	-30.5352	78.4	-23	78.4	-23.2453
78.4	297.531	78.3	294.316	78.5	176.838	78.5	44.2922	78.5	-30.5234	78.5	-23.007	78.5	-23.2547
78.5	298.234	78.4	294.789	78.6	177.156	78.6	44.4282	78.6	-30.5164	78.6	-23.0219	78.6	-23.2695
78.6	298.922	78.5	295.294	78.7	177.479	78.7	44.5618	78.7	-30.5203	78.7	-23.0508	78.7	-23.2859
78.7	299.613	78.6	295.762	78.8	177.783	78.8	44.7141	78.8	-30.5266	78.8	-23.0687	78.8	-23.2961
78.8	300.296	78.7	296.241	78.9	178.093	78.9	44.8306	78.9	-30.5281	78.9	-23.0898	78.9	-23.3008
78.9	300.989	78.8	296.731	79	178.392	79	44.9399	79	-30.5203	79	-23.0969	79	-23.3055
79	301.684	78.9	297.231	79.1	178.686	79.1	45.0571	79.1	-30.5156	79.1	-23.1195	79.1	-23.3273
79.1	302.386	79	297.723	79.2	178.984	79.2	45.1782	79.2	-30.5203	79.2	-23.1367	79.2	-23.332
79.2	303.087	79.1	298.202	79.3	179.292	79.3	45.3359	79.3	-30.511	79.3	-23.1602	79.3	-23.3445
79.3	303.757	79.2	298.68	79.4	179.595	79.4	45.4524	79.4	-30.5203	79.4	-23.182	79.4	-23.3516
79.4	304.434	79.3	299.173	79.5	179.886	79.5	45.5688	79.5	-30.5234	79.5	-23.1992	79.5	-23.3664
79.5	305.113	79.4	299.652	79.6	180.154	79.6	45.6704	79.6	-30.5039	79.6	-23.2211	79.6	-23.3836
79.6	305.796	79.5	300.169	79.7	180.452	79.7	45.7993	79.7	-30.4922	79.7	-23.2383	79.7	-23.3937
79.7	306.477	79.6	300.656	79.8	180.744	79.8	45.9016	79.8	-30.4812	79.8	-23.2601	79.8	-23.4102
79.8	307.159	79.7	301.161	79.9	181.054	79.9	46.0181	79.9	-30.4648	79.9	-23.2773	79.9	-23.4227
79.9	307.829	79.8	301.66	80	181.35	80	46.147	80	-30.4531	80	-23.2961	80	-23.4414
80	308.499	79.9	302.152	80.1	181.671	80.1	46.2727	80.1	-30.4453	80.1	-23.3109	80.1	-23.4461
80.1	309.172	80	302.637	80.2	182.002	80.2	46.4016	80.2	-30.4336	80.2	-23.3281	80.2	-23.4562
80.2	309.837	80.1	303.098	80.3	182.312	80.3	46.5211	80.3	-30.4336	80.3	-23.3516	80.3	-23.4734
80.3	310.507	80.2	303.575	80.4	182.63	80.4	46.6289	80.4	-30.4187	80.4	-23.3695	80.4	-23.4836
80.4	311.206	80.3	304.059	80.5	182.957	80.5	46.7485	80.5	-30.4109	80.5	-23.3742	80.5	-23.493
80.5	311.876	80.4	304.554	80.6	183.271	80.6	46.8938	80.6	-30.3867	80.6	-23.3906	80.6	-23.5
80.6	312.566	80.5	305.027	80.7	183.601	80.7	47.0298	80.7	-30.375	80.7	-23.4172	80.7	-23.5148
80.7	313.257	80.6	305.508	80.8	183.935	80.8	47.1461	80.8	-30.3633	80.8	-23.4281	80.8	-23.5242
80.8	313.919	80.7	305.977	80.9	184.241	80.9	47.2773	80.9	-30.3601	80.9	-23.4445	80.9	-23.5477
80.9	314.589	80.8	306.454	81	184.534	81	47.4204	81	-30.3477	81	-23.4688	81	-23.5656
81	315.277	80.9	306.917	81.1	184.838	81.1	47.5376	81.1	-30.3391	81.1	-23.4875	81.1	-23.5703
81.1	315.958	81	307.395	81.2	185.131	81.2	47.6555	81.2	-30.3367	81.2	-23.4984	81.2	-23.575
81.2	316.628	81.1	307.862	81.3	185.413	81.3	47.7555	81.3	-30.3242	81.3	-23.5078	81.3	-23.5851
81.3	317.317	81.2	308.359	81.4	185.705	81.4	47.8774	81.4	-30.3171	81.4	-23.5266	81.4	-23.6016
81.4	318.007	81.3	308.836	81.5	185.999	81.5	48.0078	81.5	-30.3093	81.5	-23.5375	81.5	-23.6063
81.5	318.68	81.4	309.36	81.6	186.296	81.6	48.1392	81.6	-30.2922	81.6	-23.5586	81.6	-23.6211
81.6	319.383	81.5	309.859	81.7	186.603	81.7	48.229	81.7	-30.2898	81.7	-23.5734	81.7	-23.6328
81.7	320.063	81.6	310.331	81.8	186.902	81.8	48.3313	81.8	-30.2852	81.8	-23.5898	81.8	-23.6406
81.8	320.727	81.7	310.816	81.9	187.214	81.9	48.4742	81.9	-30.2734	81.9	-23.5969	81.9	-23.6602
81.9	321.417	81.8	311.305	82	187.51	82	48.593	82	-30.2781	82	-23.6	82	-23.668
82	322.109	81.9	311.797	82.1	187.822	82.1	48.7024	82.1	-30.2656	82.1	-23.6164	82.1	-23.6844
82.1	322.786	82	312.27	82.2	188.116	82.2	48.8579	82.2	-30.2585	82.2	-23.6164	82.2	-23.7031
82.2	323.461	82.1	312.763	82.3	188.409	82.3	48.9868	82.3	-30.2415	82.3	-23.6289	82.3	-23.7062
82.3	324.148	82.2	313.241	82.4	188.737	82.4	49.1321	82.4	-30.2344	82.4	-23.6508	82.4	-23.7234
82.4	324.817	82.3	313.704	82.5	189.031	82.5	49.2727	82.5	-30.2227	82.5	-23.6602	82.5	-23.7305
82.5	325.499	82.4	314.168	82.6	189.33	82.6	49.4204	82.6	-30.2047	82.6	-23.675	82.6	-23.7453
82.6	326.169	82.5	314.605	82.7	189.648	82.7	49.5422	82.7	-30.1985	82.7	-23.6867	82.7	-23.7547
82.7	326.839	82.6	315.039	82.8	189.955	82.8	49.6946	82.8	-30.1921	82.8	-23.6867	82.8	-23.7766
82.8	327.509	82.7	315.496	82.9	190.249	82.9	49.8531	82.9	-30.1758	82.9	-23.6867	82.9	-23.7938
82.9	328.198	82.8	315.969	83	190.534	83	49.9844	83	-30.1687	83	-23.6945	83	-23.8055
83	328.878	82.9	316.449	83.1	190.831	83.1	50.1227	83.1	-30.1633	83.1	-23.7094	83.1	-23.8156
83.1	329.567	83	316.84	83.2	191.127	83.2	50.2656	83.2	-30.1492	83.2	-23.7305	83.2	-23.832
83.2	330.237	83.1	317.277	83.3	191.416	83.3	50.3892	83.3	-30.1445	83.3	-23.7375	83.3	-23.8398
83.3	330.907	83.2	317.704	83.4	191.695	83.4	50.511	83.4	-30.1367	83.4	-23.75	83.4	-23.8516
83.4	331.574	83.3	318.148	83.5	191.987	83.5	50.6321	83.5	-30.125	83.5	-23.7601	83.5	-23.8641
83.5	332.218	83.4	318.581	83.6	192.307	83.6	50.7516	83.6	-30.1101	83.6	-23.7766	83.6	-23.8742
83.6	332.88	83.5	319.066	83.7	192.573	83.7	50.8594	83.7	-30.1055	83.7	-23.7891	83.7	-23.8836
83.7	333.558	83.6	319.532	83.8	192.838	83.8	50.9868	83.8	-30.1055	83.8	-23.7992	83.8	-23.8953
83.8	334.237	83.7	319.984	83.9	193.178	83.9	51.1079	83.9	-30.1055	83.9	-23.8234	83.9	-23.9172
83.9	334.868	83.8	320.457	84	193.467	84	51.2141	84	-30.0938	84	-23.8477	84	-23.9461
84	335.519	83.9	320.934	84.1	193.768	84.1	51.3141	84.1	-30.0789	84.1	-23.8781	84.1	-23.9562
84.1	336.211	84	321.418	84.2	194.069	84.2	51.4211	84.2	-30.0742	84.2	-23.889	84.2	-23.9734
84.2	336.93	84.1	321.902	84.3	194.382	84.3	51.5618	84.3	-30.0547	84.3	-23.918	84.3	-23.9883
84.3	337.696	84.2	322.375	84.4	194.698	84.4	51.6704	84.4	-30.0476	84.4	-23.9367	84.4	-24.0148
84.4	338.378	84.3	322.852	84.5	195.006	84.5	51.7837	84.5	-30.0547	84.5	-23.9445	84.5	-24.0242
84.5	339	84.4	323.352	84.6	195.307	84.6	51.9329	84.6	-30.0398	84.6	-23.9641	84.6	-24.0313
84.6	339.677	84.5	323.855	84.7	195.601	84.7	52.054	84.7	-30.0469	84.7	-23.9758	84.7	-24.0391
84.7	340.378	84.6	324.323	84.8	195.87	84.8	52.1704	84.8	-30.0352	84.8	-23.9906	84.8	-24.0672
84.8	341.07	84.7	324.794	84.9	196.183	84.9	52.2798	84.9	-30.0234	84.9	-24.0031	84.9	-24.0851
84.9	341.739	84.8	325.292	85	196.479	85	52.4009	85	-30.0156	85	-24.0148	85	-24.0945
85	342.429	84.9	325.763	85.1	196.775	85.1	52.5032	85.1	-30.0039	85.1	-24.0391	85.1	-24.1242
85.1	343.102	85	326.231	85.2	197.077	85.2	52.6196	85.2	-29.9968	85.2	-24.0656	85.2	-24.1453
85.2	343.773	85.1	326.711	85.3	197.358	85.3	52.7649	85.3	-29.9844	85.3	-24.0656	85.3	-24.1633
85.3	344.473	85.2	327.16	85.4	197.644	85.4	52.8696	85.4	-29.9844	85.4	-24.0656	85.4	-24.1922
85.4	345.167	85.3	327.624	85.5	197.932	85.5	52.9915	85.5	-29.9727	85.5	-24.082	85.5	-24.2156
85.5	345.848	85.4	328.091	85.6	198.205	85.6	53.111	85.6	-29.9531	85.6	-24.0969	85.6	-24.2375
85.6	346.507	85.5	328.562	85.7	198.506	85.7	53.2336	85.7	-29.9352	85.7	-24.1164	85.7	-24.2547
85.7	347.177	85.6	329.02	85.8	198.807	85.8	53.3508	85.8	-29.929	85.8	-24.1312	85.8	-24.2766
85.8	347.859	85.7	329.484	85.9	199.101	85.9	53.4915	85.9	-29.9304	85.9	-24.1437	85.9	-24.2859
85.9	348.516	85.8	329.962	86	199.402	86	53.6274	86	-29.9187	86	-24.1555	86	-24.2961
86	349.218	85.9	330.449	86.1	199.713	86.1	53.7368	86.1	-29.9258	86.1	-24.175	86.1	-24.325
86.1	349.886	86	330.906	86.2	200.038	86.2	53.8657	86.2	-29.9211	86.2	-24.1867	86.2	-24.3445
86.2	350.579	86.1	331.379	86.3	200.351	86.3	53.9883	86.3	-29.8992	86.3	-24.1992	86.3	-24.3547
86.3	351.254	86.2	331.856	86.4	200.667	86.4	54.0914	86.4	-29.8899	86.4	-24.2258	86.4	-24.3758
86.4	351.922	86.3	332.341	86.5	200.972	86.5	54.2297	86.5	-29.8727	86.5	-24.2375	86.5	-24.3976
86.5	352.616	86.4	332.82	86.6	201.295	86.6	54.3696	86.6	-29.8672	86.6	-24.2406	86.6	-24.4102
86.6	353.29	86.5	333.258	86.7	201.62	86.7	54.511	86.7	-29.8477	86.7	-24.2531	86.7	-24.4266
86.7	353.987	86.6	333.711	86.8	201.894	86.8	54.6438	86.8	-29.8359	86.8	-24.2726	86.8	-24.4445
86.8	354.648	86.7	334.172	86.9	202.198	86.9	54.7844	86.9	-29.8196	86.9	-24.2961	86.9	-24.4609
86.9	355.325	86.8	334.612	87	202.494	87	54.9087	87	-29.8141	87	-24.3039	87	-24.4656
87	356.007	86.9	335.059	87.1	202.795	87.1	55.0454	87.1	-29.7922	87.1	-24.3203	87.1	-24.4836
87.1	356.677	87	335.488	87.2	203.086	87.2	55.1665	87.2	-29.7852	87.2	-24.3273	87.2	-24.5047
87.2	357.339	87.1	335.945	87.3	203.405	87.3	55.2727	87.3	-29.7734	87.3	-24.3351	87.3	-24.5195
87.3	358.009	87.2	336.387	87.4	203.713	87.4	55.4016	87.4	-29.7633	87.4	-24.35	87.4	-24.5391
87.4	358.676	87.3	336.825	87.5	204.011	87.5	55.4673	87.5	-29.7578	87.5	-24.3547	87.5	-24.5703
87.5	359.327	87.4	337.281	87.6	204.304	87.6	55.5571	87.6	-29.7461	87.6	-24.3547	87.6	-24.575
87.6	359.984	87.5	337.721	87.7	204.603	87.7	55.6758	87.7	-29.7344	87.7	-24.3625	87.7	-24.5969
87.7	360.656	87.6	338.173	87.8	204.902	87.8	55.7828	87.8	-29.7219	87.8	-24.3742	87.8	-24.6094
87.8	361.305	87.7	338.617	87.9	205.222	87.9	55.8625	87.9	-29.7078	87.9	-24.3906	87.9	-24.6258
87.9	361.987	87.8	339.083	88	205.56	88	55.9211	88	-29.6953	88	-24.4055	88	-24.6523
88	362.645	87.9	339.554	88.1	205.887	88.1	56.0493	88.1	-29.6836	88.1	-24.4008	88.1	-24.6602
88.1	363.288	88	340.008	88.2	206.181	88.2	56.2336	88.2	-29.6836	88.2	-24.4102	88.2	-24.6633
88.2	363.941	88.1	340.462	88.3	206.476	88.3	56.4282	88.3	-29.6687	88.3	-24.4203	88.3	-24.6844
88.3	364.587	88.2	340.91	88.4	206.736	88.4	56.5813	88.4	-29.6641	88.4	-24.4297	88.4	-24.7031
88.4	365.257	88.3	341.374	88.5	207.018	88.5	56.7336	88.5	-29.6531	88.5	-24.4367	88.5	-24.7258
88.5	365.914	88.4	341.816	88.6	207.32	88.6	56.8805	88.6	-29.6399	88.6	-24.4367	88.6	-24.7352
88.6	366.577	88.5	342.285	88.7	207.632	88.7	57.0305	88.7	-29.6414	88.7	-24.4476	88.7	-24.75
88.7	367.223	88.6	342.743	88.8	207.94	88.8	57.147	88.8	-29.6204	88.8	-24.4641	88.8	-24.7664
88.8	367.876	88.7	343.207	88.9	208.232	88.9	57.2805	88.9	-29.6101	88.9	-24.4641	88.9	-24.7844
88.9	368.523	88.8	343.68	89	208.534	89	57.3938	89	-29.5938	89	-24.4719	89	-24.8008
89	369.164	88.9	344.129	89.1	208.792	89.1	57.511	89.1	-29.5938	89.1	-24.4836	89.1	-24.8008
89.1	369.82	89	344.578	89.2	209.076	89.2	57.6353	89.2	-29.5906	89.2	-24.5	89.2	-24.8172
89.2	370.492	89.1	345.059	89.3	209.343	89.3	57.7532	89.3	-29.5859	89.3	-24.5266	89.3	-24.832
89.3	371.145	89.2	345.513	89.4	209.635	89.4	57.8649	89.4	-29.5742	89.4	-24.5344	89.4	-24.832
89.4	371.808	89.3	345.988	89.5	209.972	89.5	57.957	89.5	-29.5742	89.5	-24.5539	89.5	-24.8351
89.5	372.465	89.4	346.445	89.6	210.275	89.6	58.0641	89.6	-29.5625	89.6	-24.5656	89.6	-24.8445
89.6	373.118	89.5	346.903	89.7	210.538	89.7	58.1907	89.7	-29.5593	89.7	-24.5656	89.7	-24.8516
89.7	373.769	89.6	347.359	89.8	210.823	89.8	58.2961	89.8	-29.5579	89.8	-24.5851	89.8	-24.8633
89.8	374.434	89.7	347.812	89.9	211.108	89.9	58.4165	89.9	-29.5524	89.9	-24.5969	89.9	-24.8664
89.9	375.097	89.8	348.243	90	211.37	90	58.554	90	-29.5422	90	-24.6047	90	-24.8789
90	375.766	89.9	348.707	90.1	211.655	90.1	58.6782	90.1	-29.543	90.1	-24.6164	90.1	-24.8906
90.1	376.434	90	349.168	90.2	211.972	90.2	58.8118	90.2	-29.5398	90.2	-24.6211	90.2	-24.8953
90.2	377.105	90.1	349.609	90.3	212.256	90.3	58.9524	90.3	-29.5352	90.3	-24.6359	90.3	-24.9102
90.3	377.769	90.2	350.051	90.4	212.577	90.4	59.0836	90.4	-29.5352	90.4	-24.6508	90.4	-24.9266
90.4	378.456	90.3	350.484	90.5	212.882	90.5	59.2148	90.5	-29.532	90.5	-24.6633	90.5	-24.9414
90.5	379.145	90.4	350.923	90.6	213.162	90.6	59.3743	90.6	-29.5188	90.6	-24.675	90.6	-24.9562
90.6	379.836	90.5	351.367	90.7	213.456	90.7	59.4907	90.7	-29.5203	90.7	-24.6867	90.7	-24.9727
90.7	380.507	90.6	351.833	90.8	213.749	90.8	59.6125	90.8	-29.4961	90.8	-24.6945	90.8	-24.9805
90.8	381.172	90.7	352.284	90.9	214.034	90.9	59.7407	90.9	-29.4812	90.9	-24.6945	90.9	-24.9922
90.9	381.848	90.8	352.719	91	214.302	91	59.861	91	-29.4602	91	-24.7109	91	-25
91	382.53	90.9	353.176	91.1	214.605	91.1	59.9797	91.1	-29.4453	91.1	-24.7258	91.1	-25.0164
91.1	383.203	91	353.609	91.2	214.928	91.2	60.0977	91.2	-29.4304	91.2	-24.7406	91.2	-25.0313
91.2	383.866	91.1	354.044	91.3	215.225	91.3	60.2095	91.3	-29.4016	91.3	-24.7531	91.3	-25.0461
91.3	384.531	91.2	354.515	91.4	215.53	91.4	60.3267	91.4	-29.3828	91.4	-24.7648	91.4	-25.0508
91.4	385.208	91.3	355.013	91.5	215.804	91.5	60.436	91.5	-29.3679	91.5	-24.7648	91.5	-25.0586
91.5	385.855	91.4	355.391	91.6	216.077	91.6	60.5547	91.6	-29.3484	91.6	-24.7726	91.6	-25.075
91.6	386.527	91.5	355.855	91.7	216.331	91.7	60.6539	91.7	-29.3391	91.7	-24.8008	91.7	-25.0938
91.7	387.177	91.6	356.313	91.8	216.608	91.8	60.761	91.8	-29.321	91.8	-24.8156	91.8	-25.1016
91.8	387.834	91.7	356.75	91.9	216.902	91.9	60.8853	91.9	-29.3047	91.9	-24.8273	91.9	-25.1047
91.9	388.516	91.8	357.148	92	217.205	92	61.011	92	-29.2852	92	-24.8469	92	-25.1258
92	389.164	91.9	357.617	92.1	217.495	92.1	61.1243	92.1	-29.2734	92.1	-24.8578	92.1	-25.1555
92.1	389.82	92	358.066	92.2	217.752	92.2	61.229	92.2	-29.2625	92.2	-24.8742	92.2	-25.1602
92.2	390.465	92.1	358.481	92.3	217.983	92.3	61.3657	92.3	-29.2461	92.3	-24.8789	92.3	-25.168
92.3	391.113	92.2	358.921	92.4	218.221	92.4	61.4961	92.4	-29.2344	92.4	-24.9055	92.4	-25.1727
92.4	391.769	92.3	359.344	92.5	218.47	92.5	61.6305	92.5	-29.2195	92.5	-24.9172	92.5	-25.1961
92.5	392.434	92.4	359.816	92.6	218.785	92.6	61.7727	92.6	-29.2024	92.6	-24.9297	92.6	-25.2227
92.6	393.082	92.5	360.275	92.7	219.108	92.7	61.8938	92.7	-29.1836	92.7	-24.9484	92.7	-25.2375
92.7	393.72	92.6	360.753	92.8	219.417	92.8	62.054	92.8	-29.1641	92.8	-24.9594	92.8	-25.25
92.8	394.398	92.7	361.184	92.9	219.709	92.9	62.1978	92.9	-29.1539	92.9	-24.9758	92.9	-25.25
92.9	395.055	92.8	361.629	93	219.975	93	62.3188	93	-29.1399	93	-24.9758	93	-25.2664
93	395.698	92.9	362.062	93.1	220.261	93.1	62.4602	93.1	-29.125	93.1	-24.9953	93.1	-25.2766
93.1	396.348	93	362.509	93.2	220.562	93.2	62.6125	93.2	-29.125	93.2	-25.007	93.2	-25.2859
93.2	397.004	93.1	362.945	93.3	220.885	93.3	62.7649	93.3	-29.1149	93.3	-25.0195	93.3	-25.3008
93.3	397.679	93.2	363.398	93.4	221.206	93.4	62.9039	93.4	-29.1125	93.4	-25.0383	93.4	-25.3125
93.4	398.337	93.3	363.856	93.5	221.519	93.5	63.0305	93.5	-29.0938	93.5	-25.0461	93.5	-25.3234
93.5	399.002	93.4	364.285	93.6	221.815	93.6	63.1438	93.6	-29.0742	93.6	-25.0492	93.6	-25.3398
93.6	399.652	93.5	364.692	93.7	222.113	93.7	63.2649	93.7	-29.0742	93.7	-25.0656	93.7	-25.3398
93.7	400.313	93.6	365.093	93.8	222.404	93.8	63.3922	93.8	-29.0758	93.8	-25.0703	93.8	-25.3563
93.8	400.958	93.7	365.508	93.9	222.694	93.9	63.4915	93.9	-29.0781	93.9	-25.0851	93.9	-25.3711
93.9	401.628	93.8	365.93	94	222.991	94	63.6008	94	-29.0618	94	-25.1	94	-25.3711
94	402.285	93.9	366.34	94.1	223.304	94.1	63.7251	94.1	-29.0593	94.1	-25.1125	94.1	-25.3937
94.1	402.883	94	366.781	94.2	223.596	94.2	63.8625	94.2	-29.0547	94.2	-25.1242	94.2	-25.3984
94.2	403.468	94.1	367.234	94.3	223.894	94.3	63.9836	94.3	-29.0547	94.3	-25.1242	94.3	-25.4102
94.3	404.082	94.2	367.656	94.4	224.181	94.4	64.0852	94.4	-29.0398	94.4	-25.1406	94.4	-25.4227
94.4	404.613	94.3	368.141	94.5	224.467	94.5	64.1704	94.5	-29.0383	94.5	-25.1555	94.5	-25.4297
94.5	405.245	94.4	368.598	94.6	224.741	94.6	64.2805	94.6	-29.0563	94.6	-25.1555	94.6	-25.4414
94.6	406.012	94.5	369.101	94.7	225.034	94.7	64.4117	94.7	-29.0469	94.7	-25.1672	94.7	-25.4539
94.7	406.716	94.6	369.547	94.8	225.28	94.8	64.5305	94.8	-29.0352	94.8	-25.1867	94.8	-25.4758
94.8	407.406	94.7	370.017	94.9	225.56	94.9	64.6438	94.9	-29.0352	94.9	-25.1976	94.9	-25.4922
94.9	408.07	94.8	370.496	95	225.839	95	64.7798	95	-29.0234	95	-25.2141	95	-25.5
95	408.703	94.9	370.945	95.1	226.124	95.1	64.8821	95.1	-29.0234	95.1	-25.2219	95.1	-25.5047
95.1	409.363	95	371.395	95.2	226.378	95.2	64.9946	95.2	-29.0156	95.2	-25.2336	95.2	-25.5234
95.2	410.031	95.1	371.845	95.3	226.652	95.3	65.0884	95.3	-29.0039	95.3	-25.2453	95.3	-25.5344
95.3	410.695	95.2	372.281	95.4	226.912	95.4	65.2024	95.4	-29.0085	95.4	-25.2531	95.4	-25.5391
95.4	411.339	95.3	372.706	95.5	227.183	95.5	65.3391	95.5	-29.0156	95.5	-25.2531	95.5	-25.5555
95.5	411.984	95.4	373.117	95.6	227.456	95.6	65.4673	95.6	-29.0156	95.6	-25.2695	95.6	-25.5703
95.6	412.636	95.5	373.535	95.7	227.733	95.7	65.5813	95.7	-29.0039	95.7	-25.2766	95.7	-25.5851
95.7	413.262	95.6	373.993	95.8	228.008	95.8	65.7024	95.8	-29.0007	95.8	-25.2844	95.8	-25.5945
95.8	413.907	95.7	374.425	95.9	228.283	95.9	65.7954	95.9	-28.9844	95.9	-25.2961	95.9	-25.6016
95.9	414.558	95.8	374.836	96	228.573	96	65.936	96	-28.9844	96	-25.3039	96	-25.618
96	415.22	95.9	375.274	96.1	228.861	96.1	66.1157	96.1	-28.9695	96.1	-25.3156	96.1	-25.6281
96.1	415.866	96	375.707	96.2	229.152	96.2	66.2852	96.2	-28.9648	96.2	-25.3203	96.2	-25.6453
96.2	416.531	96.1	376.152	96.3	229.467	96.3	66.4282	96.3	-28.9648	96.3	-25.3469	96.3	-25.6672
96.3	417.184	96.2	376.623	96.4	229.753	96.4	66.5461	96.4	-28.9602	96.4	-25.3469	96.4	-25.6797
96.4	417.844	96.3	377.059	96.5	230.033	96.5	66.6704	96.5	-28.943	96.5	-25.3617	96.5	-25.6797
96.5	418.487	96.4	377.516	96.6	230.312	96.6	66.8235	96.6	-28.9407	96.6	-25.3742	96.6	-25.6961
96.6	419.138	96.5	377.984	96.7	230.596	96.7	66.9039	96.7	-28.9304	96.7	-25.3859	96.7	-25.7031
96.7	419.788	96.6	378.434	96.8	230.877	96.8	66.9797	96.8	-28.9258	96.8	-25.3859	96.8	-25.7109
96.8	420.446	96.7	378.859	96.9	231.14	96.9	67.1008	96.9	-28.9211	96.9	-25.3937	96.9	-25.7227
96.9	421.137	96.8	379.316	97	231.436	97	67.2173	97	-28.9141	97	-25.3984	97	-25.7258
97	421.803	96.9	379.789	97.1	231.709	97.1	67.3477	97.1	-28.9109	97.1	-25.4203	97.1	-25.743
97.1	422.466	97	380.226	97.2	232.011	97.2	67.4595	97.2	-28.9063	97.2	-25.4328	97.2	-25.7617
97.2	423.105	97.1	380.653	97.3	232.307	97.3	67.5524	97.3	-28.8945	97.3	-25.4328	97.3	-25.7734
97.3	423.742	97.2	381.073	97.4	232.601	97.4	67.6711	97.4	-28.8796	97.4	-25.4375	97.4	-25.7844
97.4	424.395	97.3	381.536	97.5	232.873	97.5	67.7954	97.5	-28.8704	97.5	-25.4515	97.5	-25.7938
97.5	425.019	97.4	381.918	97.6	233.184	97.6	67.9094	97.6	-28.8484	97.6	-25.4492	97.6	-25.8008
97.6	425.652	97.5	382.34	97.7	233.499	97.7	68.0376	97.7	-28.8438	97.7	-25.4562	97.7	-25.8008
97.7	426.296	97.6	382.75	97.8	233.788	97.8	68.1516	97.8	-28.821	97.8	-25.4562	97.8	-25.8125
97.8	426.876	97.7	383.163	97.9	234.07	97.9	68.2681	97.9	-28.8118	97.9	-25.468	97.9	-25.8172
97.9	427.57	97.8	383.583	98	234.346	98	68.3625	98	-28.7898	98	-25.4789	98	-25.8351
98	428.266	97.9	383.964	98.1	234.624	98.1	68.4836	98.1	-28.7773	98.1	-25.4836	98.1	-25.8398
98.1	428.937	98	384.384	98.2	234.929	98.2	68.5845	98.2	-28.7688	98.2	-25.5	98.2	-25.8563
98.2	429.574	98.1	384.804	98.3	235.21	98.3	68.7336	98.3	-28.7438	98.3	-25.5148	98.3	-25.8664
98.3	430.242	98.2	385.258	98.4	235.495	98.4	68.8657	98.4	-28.7344	98.4	-25.5266	98.4	-25.8789
98.4	430.914	98.3	385.692	98.5	235.795	98.5	68.9556	98.5	-28.7266	98.5	-25.5375	98.5	-25.8789
98.5	431.582	98.4	386.098	98.6	236.089	98.6	69.0664	98.6	-28.7219	98.6	-25.5422	98.6	-25.8953
98.6	432.254	98.5	386.488	98.7	236.377	98.7	69.1782	98.7	-28.7031	98.7	-25.5664	98.7	-25.9023
98.7	432.909	98.6	386.906	98.8	236.624	98.8	69.2798	98.8	-28.7	98.8	-25.5734	98.8	-25.9055
98.8	433.543	98.7	387.316	98.9	236.889	98.9	69.3892	98.9	-28.6836	98.9	-25.5898	98.9	-25.9227
98.9	434.184	98.8	387.695	99	237.181	99	69.4915	99	-28.6758	99	-25.6117	99	-25.9414
99	434.824	98.9	388.075	99.1	237.46	99.1	69.604	99.1	-28.6687	99.1	-25.6242	99.1	-25.9445
99.1	435.473	99	388.523	99.2	237.745	99.2	69.7024	99.2	-28.6594	99.2	-25.6242	99.2	-25.9609
99.2	436.128	99.1	388.969	99.3	238.023	99.3	69.8118	99.3	-28.6414	99.3	-25.6359	99.3	-25.9688
99.3	436.785	99.2	389.38	99.4	238.28	99.4	69.9048	99.4	-28.6296	99.4	-25.6359	99.4	-25.9852
99.4	437.422	99.3	389.82	99.5	238.545	99.5	70.0273	99.5	-28.6172	99.5	-25.6484	99.5	-25.9969
99.5	438.063	99.4	390.246	99.6	238.827	99.6	70.1978	99.6	-28.6055	99.6	-25.6672	99.6	-26.0117
99.6	438.715	99.5	390.668	99.7	239.088	99.7	70.3313	99.7	-28.5938	99.7	-25.6672	99.7	-26.0117
99.7	439.355	99.6	391.073	99.8	239.358	99.8	70.4673	99.8	-28.5859	99.8	-25.6898	99.8	-26.0148
99.8	439.963	99.7	391.484	99.9	239.645	99.9	70.593	99.9	-28.5664	99.9	-25.7062	99.9	-26.0313
99.9	440.613	99.8	391.919	100	239.943	100	70.7173	100	-28.543	100	-25.7188	100	-26.0359
100	441.254	99.9	392.336	100.1	240.195	100.1	70.854	100.1	-28.5398	100.1	-25.7375	100.1	-26.0539
100.1	441.902	100	392.763	100.2	240.463	100.2	70.9719	100.2	-28.5352	100.2	-25.7453	100.2	-26.0703
100.2	442.538	100.1	393.214	100.3	240.746	100.3	71.1008	100.3	-28.5305	100.3	-25.757	100.3	-26.075
100.3	443.172	100.2	393.664	100.4	241.025	100.4	71.2251	100.4	-28.5234	100.4	-25.7726	100.4	-26.0938
100.4	443.813	100.3	394.122	100.5	241.296	100.5	71.3391	100.5	-28.5203	100.5	-25.7961	100.5	-26.1047
100.5	444.453	100.4	394.574	100.6	241.572	100.6	71.4602	100.6	-28.5156	100.6	-25.8086	100.6	-26.1258
100.6	445.105	100.5	395.044	100.7	241.827	100.7	71.5571	100.7	-28.5039	100.7	-25.8422	100.7	-26.1406
100.7	445.746	100.6	395.488	100.8	242.12	100.8	71.6875	100.8	-28.489	100.8	-25.8547	100.8	-26.1523
100.8	446.378	100.7	395.945	100.9	242.402	100.9	71.8219	100.9	-28.4766	100.9	-25.8594	100.9	-26.1649
100.9	447.035	100.8	396.409	101	242.685	101	71.9648	101	-28.4734	101	-25.889	101	-26.1836
101	447.676	100.9	396.836	101.1	242.96	101.1	72.0767	101.1	-28.4602	101.1	-25.8937	101.1	-26.1945
101.1	448.32	101	397.27	101.2	243.241	101.2	72.2056	101.2	-28.4421	101.2	-25.9055	101.2	-26.2109
101.2	448.97	101.1	397.715	101.3	243.534	101.3	72.3313	101.3	-28.4258	101.3	-25.9133	101.3	-26.2156
101.3	449.604	101.2	398.161	101.4	243.831	101.4	72.436	101.4	-28.4211	101.4	-25.9297	101.4	-26.2344
101.4	450.239	101.3	398.581	101.5	244.116	101.5	72.5618	101.5	-28.3992	101.5	-25.9445	101.5	-26.2422
101.5	450.895	101.4	399.028	101.6	244.405	101.6	72.6758	101.6	-28.3945	101.6	-25.9562	101.6	-26.2453
101.6	451.553	101.5	399.445	101.7	244.695	101.7	72.8071	101.7	-28.3796	101.7	-25.968	101.7	-26.2617
101.7	452.203	101.6	399.857	101.8	244.987	101.8	72.9211	101.8	-28.3672	101.8	-25.9906	101.8	-26.2695
101.8	452.852	101.7	400.273	101.9	245.252	101.9	73.0422	101.9	-28.3625	101.9	-26.0031	101.9	-26.2742
101.9	453.484	101.8	400.692	102	245.55	102	73.1392	102	-28.3406	102	-26.0148	102	-26.2961
102	454.133	101.9	401.12	102.1	245.851	102.1	73.2759	102.1	-28.3242	102.1	-26.0344	102.1	-26.3086
102.1	454.773	102	401.559	102.2	246.124	102.2	73.4243	102.2	-28.3118	102.2	-26.0461	102.2	-26.325
102.2	455.409	102.1	401.981	102.3	246.412	102.3	73.5664	102.3	-28.2898	102.3	-26.0539	102.3	-26.343
102.3	456.031	102.2	402.395	102.4	246.683	102.4	73.686	102.4	-28.2852	102.4	-26.0703	102.4	-26.3641
102.4	456.664	102.3	402.797	102.5	246.943	102.5	73.8267	102.5	-28.2703	102.5	-26.0969	102.5	-26.3828
102.5	457.296	102.4	403.215	102.6	247.202	102.6	73.9602	102.6	-28.2656	102.6	-26.1047	102.6	-26.407
102.6	457.922	102.5	403.63	102.7	247.467	102.7	74.0781	102.7	-28.261	102.7	-26.1164	102.7	-26.425
102.7	458.555	102.6	404.052	102.8	247.741	102.8	74.2173	102.8	-28.2507	102.8	-26.1195	102.8	-26.4414
102.8	459.184	102.7	404.488	102.9	248.013	102.9	74.3774	102.9	-28.2344	102.9	-26.132	102.9	-26.4492
102.9	459.808	102.8	404.906	103	248.281	103	74.4868	103	-28.207	103	-26.1437	103	-26.4774
103	460.434	102.9	405.341	103.1	248.538	103.1	74.6008	103.1	-28.1953	103.1	-26.1484	103.1	-26.4953
103.1	461.043	103	405.753	103.2	248.788	103.2	74.7251	103.2	-28.1804	103.2	-26.1672	103.2	-26.5117
103.2	461.645	103.1	406.153	103.3	249.073	103.3	74.8508	103.3	-28.1836	103.3	-26.175	103.3	-26.5195
103.3	462.254	103.2	406.578	103.4	249.346	103.4	74.9883	103.4	-28.1711	103.4	-26.1797	103.4	-26.5438
103.4	462.878	103.3	406.981	103.5	249.639	103.5	75.1274	103.5	-28.1609	103.5	-26.1984	103.5	-26.5625
103.5	463.516	103.4	407.418	103.6	249.921	103.6	75.2415	103.6	-28.1563	103.6	-26.1984	103.6	-26.5625
103.6	464.145	103.5	407.816	103.7	250.214	103.7	75.3579	103.7	-28.1367	103.7	-26.2062	103.7	-26.5851
103.7	464.788	103.6	408.207	103.8	250.487	103.8	75.4719	103.8	-28.125	103.8	-26.2094	103.8	-26.5898
103.8	465.441	103.7	408.622	103.9	250.769	103.9	75.5914	103.9	-28.1172	103.9	-26.2258	103.9	-26.6141
103.9	466.063	103.8	409.027	104	251.064	104	75.7375	104	-28.0938	104	-26.2336	104	-26.6211
104	466.676	103.9	409.433	104.1	251.331	104.1	75.8579	104.1	-28.0789	104.1	-26.2453	104.1	-26.6328
104.1	467.324	104	409.836	104.2	251.616	104.2	75.9719	104.2	-28.0664	104.2	-26.2578	104.2	-26.6437
104.2	467.987	104.1	410.246	104.3	251.902	104.3	76.104	104.3	-28.0547	104.3	-26.2766	104.3	-26.6484
104.3	468.645	104.2	410.669	104.4	252.183	104.4	76.2297	104.4	-28.043	104.4	-26.2766	104.4	-26.6649
104.4	469.266	104.3	411.083	104.5	252.443	104.5	76.343	104.5	-28.032	104.5	-26.2961	104.5	-26.6844
104.5	469.905	104.4	411.491	104.6	252.702	104.6	76.4524	104.6	-28.0156	104.6	-26.2961	104.6	-26.6914
104.6	470.536	104.5	411.914	104.7	252.964	104.7	76.5735	104.7	-27.9961	104.7	-26.2992	104.7	-26.7062
104.7	471.164	104.6	412.341	104.8	253.224	104.8	76.7017	104.8	-27.9766	104.8	-26.3156	104.8	-26.7109
104.8	471.769	104.7	412.741	104.9	253.475	104.9	76.8141	104.9	-27.9617	104.9	-26.3234	104.9	-26.7352
104.9	472.402	104.8	413.158	105	253.749	105	76.9407	105	-27.957	105	-26.3281	105	-26.7453
105	473.058	104.9	413.573	105.1	254.023	105.1	77.0422	105.1	-27.9407	105.1	-26.3469	105.1	-26.75
105.1	473.703	105	413.985	105.2	254.295	105.2	77.1711	105.2	-27.9187	105.2	-26.3664	105.2	-26.7547
105.2	474.344	105.1	414.398	105.3	254.557	105.3	77.3071	105.3	-27.8945	105.3	-26.3664	105.3	-26.7766
105.3	474.953	105.2	414.82	105.4	254.815	105.4	77.4211	105.4	-27.9063	105.4	-26.3812	105.4	-26.7938
105.4	475.598	105.3	415.239	105.5	255.096	105.5	77.5454	105.5	-27.8945	105.5	-26.4055	105.5	-26.8125
105.5	476.218	105.4	415.661	105.6	255.37	105.6	77.6711	105.6	-27.8914	105.6	-26.418	105.6	-26.8125
105.6	476.875	105.5	416.085	105.7	255.644	105.7	77.7954	105.7	-27.875	105.7	-26.425	105.7	-26.825
105.7	477.519	105.6	416.489	105.8	255.923	105.8	77.918	105.8	-27.8508	105.8	-26.4367	105.8	-26.8438
105.8	478.188	105.7	416.929	105.9	256.191	105.9	78.0446	105.9	-27.8406	105.9	-26.4476	105.9	-26.8516
105.9	478.816	105.8	417.368	106	256.491	106	78.1516	106	-27.8359	106	-26.4641	106	-26.8664
106	479.432	105.9	417.79	106.1	256.765	106.1	78.2446	106.1	-27.8242	106.1	-26.4641	106.1	-26.8711
106.1	480.048	106	418.223	106.2	257.038	106.2	78.3704	106.2	-27.821	106.2	-26.4719	106.2	-26.8875
106.2	480.687	106.1	418.661	106.3	257.315	106.3	78.4719	106.3	-27.8047	106.3	-26.4805	106.3	-26.9055
106.3	481.313	106.2	419.042	106.4	257.593	106.4	78.5767	106.4	-27.8047	106.4	-26.4789	106.4	-26.9219
106.4	481.953	106.3	419.438	106.5	257.858	106.5	78.6829	106.5	-27.8125	106.5	-26.4953	106.5	-26.9266
106.5	482.594	106.4	419.845	106.6	258.135	106.6	78.7727	106.6	-27.8015	106.6	-26.5031	106.6	-26.9414
106.6	483.198	106.5	420.241	106.7	258.421	106.7	78.8774	106.7	-27.8047	106.7	-26.5148	106.7	-26.9531
106.7	483.813	106.6	420.645	106.8	258.706	106.8	78.9915	106.8	-27.8164	106.8	-26.5148	106.8	-26.9562
106.8	484.414	106.7	421.013	106.9	258.967	106.9	79.1157	106.9	-27.8132	106.9	-26.5226	106.9	-26.9688
106.9	485.043	106.8	421.406	107	259.241	107	79.2336	107	-27.8164	107	-26.5391	107	-26.9805
107	485.669	106.9	421.789	107.1	259.523	107.1	79.3547	107.1	-27.8164	107.1	-26.5539	107.1	-26.9852
107.1	486.303	107	422.188	107.2	259.811	107.2	79.4742	107.2	-27.8164	107.2	-26.5656	107.2	-27
107.2	486.93	107.1	422.547	107.3	260.065	107.3	79.5696	107.3	-27.8118	107.3	-26.5734	107.3	-27.0148
107.3	487.55	107.2	422.945	107.4	260.358	107.4	79.6829	107.4	-27.8141	107.4	-26.5851	107.4	-27.0359
107.4	488.184	107.3	423.356	107.5	260.613	107.5	79.8071	107.5	-27.8118	107.5	-26.5851	107.5	-27.0508
107.5	488.805	107.4	423.782	107.6	260.897	107.6	79.9329	107.6	-27.7976	107.6	-26.5969	107.6	-27.0625
107.6	489.437	107.5	424.183	107.7	261.163	107.7	80.0571	107.7	-27.8118	107.7	-26.6094	107.7	-27.0703
107.7	490.067	107.6	424.591	107.8	261.417	107.8	80.1711	107.8	-27.7946	107.8	-26.6312	107.8	-27.075
107.8	490.703	107.7	425.02	107.9	261.683	107.9	80.3118	107.9	-27.7852	107.9	-26.6359	107.9	-27.0938
107.9	491.324	107.8	425.452	108	261.951	108	80.4329	108	-27.7852	108	-26.6602	108	-27.1047
108	491.936	107.9	425.852	108.1	262.213	108.1	80.5328	108.1	-27.7578	108.1	-26.6672	108.1	-27.1211
108.1	492.543	108	426.297	108.2	262.472	108.2	80.6516	108.2	-27.7539	108.2	-26.6867	108.2	-27.1211
108.2	493.164	108.1	426.731	108.3	262.737	108.3	80.7798	108.3	-27.7415	108.3	-26.7015	108.3	-27.1289
108.3	493.754	108.2	427.156	108.4	262.979	108.4	80.9063	108.4	-27.7195	108.4	-26.7141	108.4	-27.1406
108.4	494.375	108.3	427.542	108.5	263.226	108.5	81.0524	108.5	-27.7148	108.5	-26.7336	108.5	-27.1453
108.5	494.992	108.4	427.942	108.6	263.47	108.6	81.1907	108.6	-27.7227	108.6	-26.75	108.6	-27.1641
108.6	495.601	108.5	428.323	108.7	263.722	108.7	81.3118	108.7	-27.7195	108.7	-26.7648	108.7	-27.175
108.7	496.203	108.6	428.731	108.8	264.003	108.8	81.4407	108.8	-27.6907	108.8	-26.7766	108.8	-27.1914
108.8	496.805	108.7	429.141	108.9	264.26	108.9	81.5852	108.9	-27.6719	108.9	-26.7844	108.9	-27.1992
108.9	497.429	108.8	429.532	109	264.494	109	81.6978	109	-27.6539	109	-26.7961	109	-27.2109
109	498.043	108.9	429.965	109.1	264.753	109.1	81.8384	109.1	-27.6445	109.1	-26.8078	109.1	-27.2156
109.1	498.672	109	430.362	109.2	265.018	109.2	81.9673	109.2	-27.6204	109.2	-26.8156	109.2	-27.2305
109.2	499.269	109.1	430.773	109.3	265.295	109.3	82.0618	109.3	-27.5984	109.3	-26.8156	109.3	-27.2422
109.3	499.888	109.2	431.197	109.4	265.565	109.4	82.1829	109.4	-27.5859	109.4	-26.8273	109.4	-27.2539
109.4	500.507	109.3	431.624	109.5	265.843	109.5	82.3149	109.5	-27.5742	109.5	-26.8383	109.5	-27.2617
109.5	501.152	109.4	432.043	109.6	266.128	109.6	82.4329	109.6	-27.5515	109.6	-26.8547	109.6	-27.2766
109.6	501.754	109.5	432.492	109.7	266.424	109.7	82.55	109.7	-27.5273	109.7	-26.8594	109.7	-27.2891
109.7	502.363	109.6	432.935	109.8	266.706	109.8	82.6711	109.8	-27.511	109.8	-26.8742	109.8	-27.2891
109.8	502.984	109.7	433.348	109.9	266.956	109.9	82.7954	109.9	-27.4844	109.9	-26.8859	109.9	-27.2938
109.9	503.625	109.8	433.715	110	267.23	110	82.9016	110	-27.4648	110	-26.8937	110	-27.3125
110	504.264	109.9	434.105	110.1	267.499	110.1	83.0376	110.1	-27.443	110.1	-26.8984	110.1	-27.3125
110.1	504.902	110	434.478	110.2	267.784	110.2	83.147	110.2	-27.4407	110.2	-26.9172	110.2	-27.3234
110.2	505.551	110.1	434.848	110.3	268.05	110.3	83.2656	110.3	-27.4226	110.3	-26.9172	110.3	-27.3398
110.3	506.145	110.2	435.214	110.4	268.312	110.4	83.3892	110.4	-27.4094	110.4	-26.9289	110.4	-27.3477
110.4	506.762	110.3	435.571	110.5	268.565	110.5	83.4836	110.5	-27.3914	110.5	-26.9367	110.5	-27.3477
110.5	507.398	110.4	436.039	110.6	268.812	110.6	83.5767	110.6	-27.3821	110.6	-26.9398	110.6	-27.3524
110.6	508.016	110.5	436.462	110.7	269.077	110.7	83.686	110.7	-27.3601	110.7	-26.9562	110.7	-27.3664
110.7	508.648	110.6	436.898	110.8	269.299	110.8	83.8	110.8	-27.3438	110.8	-26.9562	110.8	-27.3594
110.8	509.293	110.7	437.304	110.9	269.581	110.9	83.9211	110.9	-27.3328	110.9	-26.9641	110.9	-27.3758
110.9	509.938	110.8	437.695	111	269.889	111	84.0259	111	-27.3313	111	-26.9758	111	-27.3781
111	510.555	110.9	438.109	111.1	270.142	111.1	84.1274	111.1	-27.3125	111.1	-26.9836	111.1	-27.3836
111.1	511.162	111	438.54	111.2	270.426	111.2	84.218	111.2	-27.321	111.2	-26.9953	111.2	-27.3906
111.2	511.781	111.1	438.952	111.3	270.698	111.3	84.3313	111.3	-27.3047	111.3	-27.007	111.3	-27.4023
111.3	512.402	111.2	439.348	111.4	270.979	111.4	84.436	111.4	-27.3047	111.4	-27.0148	111.4	-27.4102
111.4	513.028	111.3	439.738	111.5	271.249	111.5	84.5469	111.5	-27.3015	111.5	-27.0266	111.5	-27.4102
111.5	513.655	111.4	440.134	111.6	271.533	111.6	84.6665	111.6	-27.2922	111.6	-27.0391	111.6	-27.4266
111.6	514.273	111.5	440.55	111.7	271.797	111.7	84.7954	111.7	-27.2703	111.7	-27.0461	111.7	-27.4336
111.7	514.907	111.6	440.942	111.8	272.081	111.8	84.9258	111.8	-27.2773	111.8	-27.0578	111.8	-27.4414
111.8	515.523	111.7	441.328	111.9	272.314	111.9	85.0376	111.9	-27.2656	111.9	-27.0687	111.9	-27.4562
111.9	516.116	111.8	441.746	112	272.562	112	85.1353	112	-27.2656	112	-27.0851	112	-27.4609
112	516.742	111.9	442.161	112.1	272.823	112.1	85.2219	112.1	-27.2578	112.1	-27.093	112.1	-27.4688
112.1	517.395	112	442.578	112.2	273.101	112.2	85.3235	112.2	-27.2507	112.2	-27.1047	112.2	-27.4688
112.2	518.023	112.1	442.945	112.3	273.37	112.3	85.4329	112.3	-27.2461	112.3	-27.1242	112.3	-27.4805
112.3	518.676	112.2	443.324	112.4	273.647	112.4	85.5454	112.4	-27.2461	112.4	-27.1359	112.4	-27.4852
112.4	519.305	112.3	443.724	112.5	273.905	112.5	85.6353	112.5	-27.2539	112.5	-27.1484	112.5	-27.4922
112.5	519.895	112.4	444.145	112.6	274.186	112.6	85.7493	112.6	-27.2539	112.6	-27.1672	112.6	-27.5039
112.6	520.487	112.5	444.547	112.7	274.448	112.7	85.8735	112.7	-27.2507	112.7	-27.1672	112.7	-27.5148
112.7	521.133	112.6	444.942	112.8	274.745	112.8	85.9961	112.8	-27.2461	112.8	-27.1703	112.8	-27.5195
112.8	521.754	112.7	445.343	112.9	275.019	112.9	86.1274	112.9	-27.2415	112.9	-27.1828	112.9	-27.5313
112.9	522.355	112.8	445.746	113	275.312	113	86.2493	113	-27.2195	113	-27.1945	113	-27.5391
113	522.944	112.9	446.133	113.1	275.604	113.1	86.3821	113.1	-27.2117	113.1	-27.207	113.1	-27.5508
113.1	523.523	113	446.52	113.2	275.89	113.2	86.5376	113.2	-27.2024	113.2	-27.2258	113.2	-27.5508
113.2	524.102	113.1	446.911	113.3	276.152	113.3	86.6758	113.3	-27.1921	113.3	-27.2375	113.3	-27.5633
113.3	524.684	113.2	447.324	113.4	276.42	113.4	86.8102	113.4	-27.1758	113.4	-27.2484	113.4	-27.582
113.4	525.29	113.3	447.746	113.5	276.683	113.5	86.957	113.5	-27.1711	113.5	-27.2648	113.5	-27.5938
113.5	525.905	113.4	448.149	113.6	276.963	113.6	87.0962	113.6	-27.1609	113.6	-27.2844	113.6	-27.5938
113.6	526.516	113.5	448.547	113.7	277.241	113.7	87.2493	113.7	-27.1445	113.7	-27.2844	113.7	-27.5938
113.7	527.109	113.6	448.93	113.8	277.506	113.8	87.3774	113.8	-27.1414	113.8	-27.3086	113.8	-27.6047
113.8	527.672	113.7	449.323	113.9	277.749	113.9	87.5156	113.9	-27.1204	113.9	-27.3273	113.9	-27.6211
113.9	528.293	113.8	449.724	114	278.006	114	87.6392	114	-27.1133	114	-27.3351	114	-27.6336
114	528.909	113.9	450.109	114.1	278.253	114.1	87.7563	114.1	-27.1101	114.1	-27.3351	114.1	-27.6406
114.1	529.523	114	450.495	114.2	278.459	114.2	87.9016	114.2	-27.1008	114.2	-27.3547	114.2	-27.6523
114.2	530.133	114.1	450.872	114.3	278.69	114.3	88.0383	114.3	-27.0906	114.3	-27.3547	114.3	-27.657
114.3	530.754	114.2	451.266	114.4	278.943	114.4	88.1594	114.4	-27.0859	114.4	-27.3664	114.4	-27.6719
114.4	531.375	114.3	451.637	114.5	279.183	114.5	88.2759	114.5	-27.0742	114.5	-27.3789	114.5	-27.6836
114.5	532.004	114.4	452.02	114.6	279.417	114.6	88.3938	114.6	-27.071	114.6	-27.3976	114.6	-27.6867
114.6	532.597	114.5	452.398	114.7	279.647	114.7	88.5063	114.7	-27.0618	114.7	-27.3976	114.7	-27.7039
114.7	533.203	114.6	452.797	114.8	279.89	114.8	88.6204	114.8	-27.0593	114.8	-27.4172	114.8	-27.7227
114.8	533.832	114.7	453.2	114.9	280.132	114.9	88.7336	114.9	-27.0422	114.9	-27.4289	114.9	-27.7375
114.9	534.426	114.8	453.594	115	280.345	115	88.8267	115	-27.0203	115	-27.4367	115	-27.75
115	535.016	114.9	454.008	115.1	280.573	115.1	88.9329	115.1	-27.0156	115.1	-27.4562	115.1	-27.75
115.1	535.617	115	454.399	115.2	280.807	115.2	89.0454	115.2	-27.0078	115.2	-27.468	115.2	-27.7664
115.2	536.194	115.1	454.809	115.3	281.065	115.3	89.147	115.3	-26.9929	115.3	-27.4789	115.3	-27.7813
115.3	536.79	115.2	455.195	115.4	281.346	115.4	89.2415	115.4	-26.9719	115.4	-27.4953	115.4	-27.793
115.4	537.382	115.3	455.594	115.5	281.581	115.5	89.3657	115.5	-26.9617	115.5	-27.5031	115.5	-27.793
115.5	537.965	115.4	456.023	115.6	281.831	115.6	89.4961	115.6	-26.9524	115.6	-27.5148	115.6	-27.8008
115.6	538.589	115.5	456.419	115.7	282.08	115.7	89.6157	115.7	-26.9304	115.7	-27.5266	115.7	-27.8039
115.7	539.242	115.6	456.821	115.8	282.339	115.8	89.7219	115.8	-26.9211	115.8	-27.5344	115.8	-27.8203
115.8	539.856	115.7	457.202	115.9	282.604	115.9	89.8149	115.9	-26.9109	115.9	-27.5461	115.9	-27.8328
115.9	540.477	115.8	457.598	116	282.863	116	89.9165	116	-26.9031	116	-27.5539	116	-27.8516
116	541.053	115.9	457.977	116.1	283.132	116.1	90.0273	116.1	-26.8899	116.1	-27.5703	116.1	-27.8664
116.1	541.672	116	458.336	116.2	283.385	116.2	90.1422	116.2	-26.8828	116.2	-27.5851	116.2	-27.8789
116.2	542.278	116.1	458.704	116.3	283.671	116.3	90.2415	116.3	-26.875	116.3	-27.5969	116.3	-27.8836
116.3	542.898	116.2	459.09	116.4	283.948	116.4	90.3384	116.4	-26.8601	116.4	-27.6086	116.4	-27.9023
116.4	543.492	116.3	459.48	116.5	284.194	116.5	90.4407	116.5	-26.8508	116.5	-27.6086	116.5	-27.907
116.5	544.094	116.4	459.841	116.6	284.444	116.6	90.554	116.6	-26.8406	116.6	-27.6164	116.6	-27.925
116.6	544.737	116.5	460.222	116.7	284.702	116.7	90.6665	116.7	-26.8313	116.7	-27.639	116.7	-27.9414
116.7	545.388	116.6	460.591	116.8	284.963	116.8	90.7773	116.8	-26.8289	116.8	-27.6555	116.8	-27.9461
116.8	546.05	116.7	460.984	116.9	285.238	116.9	90.9087	116.9	-26.8406	116.9	-27.6523	116.9	-27.9641
116.9	546.664	116.8	461.372	117	285.511	117	91.0454	117	-26.8359	117	-27.6672	117	-27.9852
117	547.195	116.9	461.754	117.1	285.795	117.1	91.1758	117.1	-26.8313	117.1	-27.675	117.1	-27.9875
117.1	547.793	117	462.184	117.2	286.042	117.2	91.2993	117.2	-26.8141	117.2	-27.6867	117.2	-27.9969
117.2	548.417	117.1	462.598	117.3	286.307	117.3	91.4282	117.3	-26.8118	117.3	-27.7062	117.3	-28.0117
117.3	549.023	117.2	463.016	117.4	286.565	117.4	91.5454	117.4	-26.8015	117.4	-27.7062	117.4	-28.0117
117.4	549.645	117.3	463.438	117.5	286.827	117.5	91.679	117.5	-26.7969	117.5	-27.718	117.5	-28.0148
117.5	550.203	117.4	463.863	117.6	287.074	117.6	91.8	117.6	-26.7969	117.6	-27.7258	117.6	-28.0313
117.6	550.813	117.5	464.314	117.7	287.346	117.7	91.897	117.7	-26.8	117.7	-27.7453	117.7	-28.0438
117.7	551.429	117.6	464.73	117.8	287.596	117.8	92.0156	117.8	-26.7898	117.8	-27.757	117.8	-28.0508
117.8	552.063	117.7	465.145	117.9	287.846	117.9	92.147	117.9	-26.7703	117.9	-27.7601	117.9	-28.0508
117.9	552.645	117.8	465.52	118	288.096	118	92.261	118	-26.7656	118	-27.7695	118	-28.0656
118	553.237	117.9	465.887	118.1	288.347	118.1	92.3853	118.1	-26.761	118.1	-27.7883	118.1	-28.075
118.1	553.832	118	466.266	118.2	288.584	118.2	92.5032	118.2	-26.7539	118.2	-27.8109	118.2	-28.0945
118.2	554.434	118.1	466.637	118.3	288.847	118.3	92.6086	118.3	-26.7507	118.3	-27.8203	118.3	-28.1047
118.3	555.023	118.2	467.02	118.4	289.113	118.4	92.7219	118.4	-26.7297	118.4	-27.8273	118.4	-28.1258
118.4	555.613	118.3	467.38	118.5	289.374	118.5	92.8384	118.5	-26.7195	118.5	-27.8469	118.5	-28.1437
118.5	556.222	118.4	467.746	118.6	289.624	118.6	92.9602	118.6	-26.7148	118.6	-27.8664	118.6	-28.1484
118.6	556.817	118.5	468.112	118.7	289.89	118.7	93.0767	118.7	-26.7117	118.7	-27.8859	118.7	-28.1649
118.7	557.412	118.6	468.477	118.8	290.152	118.8	93.2024	118.8	-26.6907	118.8	-27.8976	118.8	-28.1867
118.8	557.98	118.7	468.828	118.9	290.412	118.9	93.3462	118.9	-26.6804	118.9	-27.9172	118.9	-28.1961
118.9	558.582	118.8	469.188	119	290.679	119	93.4602	119	-26.6758	119	-27.9367	119	-28.2109
119	559.184	118.9	469.591	119.1	290.941	119.1	93.5618	119.1	-26.6641	119.1	-27.9484	119.1	-28.2274
119.1	559.785	119	470	119.2	291.217	119.2	93.6665	119.2	-26.6609	119.2	-27.9562	119.2	-28.2344
119.2	560.375	119.1	470.387	119.3	291.48	119.3	93.7727	119.3	-26.6399	119.3	-27.9758	119.3	-28.2422
119.3	560.965	119.2	470.789	119.4	291.737	119.4	93.8853	119.4	-26.6218	119.4	-27.9875	119.4	-28.2453
119.4	561.542	119.3	471.173	119.5	291.987	119.5	93.9915	119.5	-26.6008	119.5	-28.007	119.5	-28.2617
119.5	562.145	119.4	471.57	119.6	292.249	119.6	94.0813	119.6	-26.582	119.6	-28.0148	119.6	-28.2664
119.6	562.754	119.5	471.949	119.7	292.499	119.7	94.186	119.7	-26.5789	119.7	-28.0383	119.7	-28.293
119.7	563.375	119.6	472.34	119.8	292.768	119.8	94.2876	119.8	-26.5547	119.8	-28.0414	119.8	-28.2961
119.8	563.977	119.7	472.699	119.9	293.045	119.9	94.3977	119.9	-26.5547	119.9	-28.0461	119.9	-28.3133
119.9	564.612	119.8	473.047	120	293.307	120	94.4836	120	-26.5469	120	-28.0656	120	-28.332
120	565.215	119.9	473.419	120.1	293.531	120.1	94.5735	120.1	-26.5203	120.1	-28.0734	120.1	-28.3438
120.1	565.836	120	473.809	120.2	293.804	120.2	94.686	120.2	-26.4961	120.2	-28.0969	120.2	-28.3547
120.2	566.437	120.1	474.168	120.3	294.045	120.3	94.7954	120.3	-26.4844	120.3	-28.1047	120.3	-28.3836
120.3	567.058	120.2	474.496	120.4	294.225	120.4	94.8821	120.4	-26.4617	120.4	-28.1242	120.4	-28.4055
120.4	567.672	120.3	474.833	120.5	294.308	120.5	95.0063	120.5	-26.4407	120.5	-28.1359	120.5	-28.4227
120.5	568.293	120.4	475.253	120.6	294.444	120.6	95.1204	120.6	-26.4304	120.6	-28.1437	120.6	-28.4461
120.6	568.883	120.5	475.673	120.7	294.854	120.7	95.2383	120.7	-26.4094	120.7	-28.1555	120.7	-28.4562
120.7	569.484	120.6	476.117	120.8	295.14	120.8	95.3579	120.8	-26.4023	120.8	-28.1633	120.8	-28.4774
120.8	570.07	120.7	476.566	120.9	295.433	120.9	95.4868	120.9	-26.3992	120.9	-28.175	120.9	-28.4953
120.9	570.664	120.8	476.945	121	295.691	121	95.5813	121	-26.375	121	-28.1945	121	-28.5047
121	571.249	120.9	477.282	121.1	295.987	121.1	95.7056	121.1	-26.3555	121.1	-28.2031	121.1	-28.5234
121.1	571.837	121	477.62	121.2	296.281	121.2	95.8079	121.2	-26.3523	121.2	-28.2062	121.2	-28.5344
121.2	572.434	121.1	477.997	121.3	296.565	121.3	95.9602	121.3	-26.3313	121.3	-28.2062	121.3	-28.5438
121.3	573.038	121.2	478.372	121.4	296.846	121.4	96.0767	121.4	-26.321	121.4	-28.218	121.4	-28.5625
121.4	573.633	121.3	478.749	121.5	297.12	121.5	96.207	121.5	-26.3047	121.5	-28.2211	121.5	-28.5656
121.5	574.234	121.4	479.11	121.6	297.402	121.6	96.3071	121.6	-26.2852	121.6	-28.2258	121.6	-28.5828
121.6	574.82	121.5	479.484	121.7	297.673	121.7	96.4243	121.7	-26.2703	121.7	-28.2258	121.7	-28.6016
121.7	575.434	121.6	479.88	121.8	297.948	121.8	96.5352	121.8	-26.261	121.8	-28.2336	121.8	-28.6141
121.8	576.035	121.7	480.277	121.9	298.206	121.9	96.6633	121.9	-26.2507	121.9	-28.2453	121.9	-28.6359
121.9	576.633	121.8	480.652	122	298.483	122	96.7759	122	-26.2415	122	-28.257	122	-28.6523
122	577.246	121.9	481.032	122.1	298.734	122.1	96.9165	122.1	-26.2312	122.1	-28.2648	122.1	-28.6523
122.1	577.851	122	481.406	122.2	299.002	122.2	97.0383	122.2	-26.2148	122.2	-28.2766	122.2	-28.6649
122.2	578.441	122.1	481.805	122.3	299.266	122.3	97.1711	122.3	-26.1985	122.3	-28.2914	122.3	-28.6836
122.3	579.04	122.2	482.184	122.4	299.518	122.4	97.2876	122.4	-26.1804	122.4	-28.2844	122.4	-28.6945
122.4	579.637	122.3	482.567	122.5	299.761	122.5	97.4094	122.5	-26.1758	122.5	-28.3039	122.5	-28.7109
122.5	580.23	122.4	482.95	122.6	300.018	122.6	97.5454	122.6	-26.1609	122.6	-28.3039	122.6	-28.7188
122.6	580.828	122.5	483.336	122.7	300.273	122.7	97.6594	122.7	-26.1563	122.7	-28.3156	122.7	-28.7352
122.7	581.409	122.6	483.719	122.8	300.521	122.8	97.8	122.8	-26.1399	122.8	-28.3203	122.8	-28.7453
122.8	582.004	122.7	484.094	122.9	300.766	122.9	97.929	122.9	-26.1414	122.9	-28.3273	122.9	-28.7695
122.9	582.594	122.8	484.462	123	301.013	123	98.0454	123	-26.125	123	-28.3351	123	-28.7695
123	583.191	122.9	484.833	123.1	301.281	123.1	98.179	123.1	-26.1328	123.1	-28.3469	123.1	-28.7859
123.1	583.785	123	485.21	123.2	301.565	123.2	98.2883	123.2	-26.1296	123.2	-28.3469	123.2	-28.8008
123.2	584.363	123.1	485.618	123.3	301.823	123.3	98.4165	123.3	-26.1125	123.3	-28.3664	123.3	-28.8125
123.3	584.96	123.2	485.996	123.4	302.057	123.4	98.5383	123.4	-26.0906	123.4	-28.3664	123.4	-28.8125
123.4	585.552	123.3	486.372	123.5	302.32	123.5	98.6563	123.5	-26.0742	123.5	-28.3742	123.5	-28.832
123.5	586.14	123.4	486.745	123.6	302.577	123.6	98.7633	123.6	-26.071	123.6	-28.3859	123.6	-28.8367
123.6	586.715	123.5	487.106	123.7	302.819	123.7	98.8555	123.7	-26.0618	123.7	-28.3859	123.7	-28.8516
123.7	587.285	123.6	487.477	123.8	303.062	123.8	98.9915	123.8	-26.0547	123.8	-28.3976	123.8	-28.8664
123.8	587.882	123.7	487.868	123.9	303.322	123.9	99.0962	123.9	-26.0547	123.9	-28.4055	123.9	-28.8828
123.9	588.441	123.8	488.27	124	303.574	124	99.2297	124	-26.0593	124	-28.4055	124	-28.8828
124	589.001	123.9	488.664	124.1	303.846	124.1	99.3462	124.1	-26.043	124.1	-28.4172	124.1	-28.8906
124.1	589.589	124	489.066	124.2	304.088	124.2	99.4602	124.2	-26.043	124.2	-28.4172	124.2	-28.9023
124.2	590.105	124.1	489.442	124.3	304.334	124.3	99.5813	124.3	-26.0398	124.3	-28.425	124.3	-28.907
124.3	590.824	124.2	489.789	124.4	304.573	124.4	99.686	124.4	-26.0352	124.4	-28.4367	124.4	-28.9219
124.4	591.395	124.3	490.168	124.5	304.802	124.5	99.7727	124.5	-26.0305	124.5	-28.4367	124.5	-28.925
124.5	592.065	124.4	490.55	124.6	305.047	124.6	99.8774	124.6	-26.0203	124.6	-28.4515	124.6	-28.9297
124.6	592.641	124.5	490.938	124.7	305.298	124.7	99.9719	124.7	-26.0039	124.7	-28.4492	124.7	-28.9414
124.7	593.184	124.6	491.321	124.8	305.547	124.8	100.093	124.8	-26.0007	124.8	-28.4641	124.8	-28.9414
124.8	593.788	124.7	491.707	124.9	305.81	124.9	100.198	124.9	-25.9797	124.9	-28.4641	124.9	-28.9492
124.9	594.383	124.8	492.073	125	306.063	125	100.312	125	-25.9695	125	-28.4758	125	-28.9609
125	594.973	124.9	492.442	125.1	306.31	125.1	100.402	125.1	-25.9648	125.1	-28.4758	125.1	-28.9656
125.1	595.57	125	492.816	125.2	306.555	125.2	100.518	125.2	-25.9453	125.2	-28.4875	125.2	-28.9805
125.2	596.172	125.1	493.195	125.3	306.799	125.3	100.627	125.3	-25.9336	125.3	-28.4953	125.3	-28.9922
125.3	596.73	125.2	493.598	125.4	307.013	125.4	100.727	125.4	-25.9304	125.4	-28.4953	125.4	-29.0039
125.4	597.317	125.3	493.996	125.5	307.281	125.5	100.846	125.5	-25.9258	125.5	-28.507	125.5	-29.0039
125.5	597.914	125.4	494.36	125.6	307.55	125.6	100.98	125.6	-25.9211	125.6	-28.5148	125.6	-29.0234
125.6	598.484	125.5	494.73	125.7	307.819	125.7	101.096	125.7	-25.9109	125.7	-28.5266	125.7	-29.0313
125.7	599.055	125.6	495.11	125.8	308.092	125.8	101.214	125.8	-25.9016	125.8	-28.5297	125.8	-29.0313
125.8	599.659	125.7	495.52	125.9	308.374	125.9	101.312	125.9	-25.8796	125.9	-28.5422	125.9	-29.043
125.9	600.249	125.8	495.906	126	308.632	126	101.417	126	-25.8704	126	-28.5539	126	-29.0508
126	600.852	125.9	496.3	126.1	308.902	126.1	101.511	126.1	-25.8601	126.1	-28.5539	126.1	-29.0625
126.1	601.441	126	496.693	126.2	309.186	126.2	101.62	126.2	-25.8406	126.2	-28.5656	126.2	-29.0703
126.2	602.019	126.1	497.078	126.3	309.441	126.3	101.713	126.3	-25.8313	126.3	-28.5734	126.3	-29.0703
126.3	602.621	126.2	497.465	126.4	309.706	126.4	101.797	126.4	-25.8242	126.4	-28.5898	126.4	-29.082
126.4	603.203	126.3	497.828	126.5	309.991	126.5	101.902	126.5	-25.821	126.5	-28.6047	126.5	-29.0938
126.5	603.805	126.4	498.195	126.6	310.268	126.6	102.002	126.6	-25.8	126.6	-28.6164	126.6	-29.1047
126.6	604.395	126.5	498.574	126.7	310.514	126.7	102.098	126.7	-25.8015	126.7	-28.6289	126.7	-29.1211
126.7	604.996	126.6	498.942	126.8	310.788	126.8	102.234	126.8	-25.782	126.8	-28.6476	126.8	-29.1289
126.8	605.594	126.7	499.297	126.9	311.062	126.9	102.338	126.9	-25.761	126.9	-28.6508	126.9	-29.1289
126.9	606.184	126.8	499.653	127	311.327	127	102.467	127	-25.7429	127	-28.6555	127	-29.1406
127	606.757	126.9	500.02	127.1	311.577	127.1	102.589	127.1	-25.7297	127.1	-28.668	127.1	-29.1484
127.1	607.336	127	500.394	127.2	311.831	127.2	102.71	127.2	-25.7117	127.2	-28.6867	127.2	-29.1602
127.2	607.914	127.1	500.766	127.3	312.057	127.3	102.831	127.3	-25.7024	127.3	-28.6867	127.3	-29.1797
127.3	608.507	127.2	501.145	127.4	312.3	127.4	102.96	127.4	-25.6804	127.4	-28.6984	127.4	-29.1797
127.4	609.082	127.3	501.516	127.5	312.541	127.5	103.096	127.5	-25.6711	127.5	-28.7062	127.5	-29.1992
127.5	609.684	127.4	501.891	127.6	312.761	127.6	103.21	127.6	-25.6492	127.6	-28.7094	127.6	-29.1992
127.6	610.254	127.5	502.266	127.7	313.006	127.7	103.339	127.7	-25.6414	127.7	-28.7305	127.7	-29.2109
127.7	610.831	127.6	502.661	127.8	313.264	127.8	103.46	127.8	-25.6204	127.8	-28.7289	127.8	-29.2234
127.8	611.414	127.7	503.042	127.9	313.511	127.9	103.573	127.9	-25.6023	127.9	-28.7453	127.9	-29.2305
127.9	612.004	127.8	503.47	128	313.722	128	103.698	128	-25.6008	128	-28.7453	128	-29.2422
128	612.574	127.9	503.851	128.1	313.94	128.1	103.807	128.1	-25.5789	128.1	-28.7531	128.1	-29.2453
128.1	613.159	128	504.212	128.2	314.202	128.2	103.909	128.2	-25.5742	128.2	-28.7648	128.2	-29.2578
128.2	613.723	128.1	504.591	128.3	314.431	128.3	104.031	128.3	-25.5781	128.3	-28.7726	128.3	-29.2695
128.3	614.288	128.2	504.957	128.4	314.691	128.4	104.171	128.4	-25.5618	128.4	-28.7891	128.4	-29.2695
128.4	614.852	128.3	505.309	128.5	314.948	128.5	104.288	128.5	-25.5476	128.5	-28.8156	128.5	-29.2742
128.5	615.429	128.4	505.644	128.6	315.183	128.6	104.39	128.6	-25.532	128.6	-28.8156	128.6	-29.293
128.6	616.001	128.5	506.001	128.7	315.436	128.7	104.506	128.7	-25.5305	128.7	-28.8273	128.7	-29.3008
128.7	616.613	128.6	506.367	128.8	315.667	128.8	104.62	128.8	-25.5125	128.8	-28.8351	128.8	-29.3008
128.8	617.198	128.7	506.719	128.9	315.89	128.9	104.738	128.9	-25.4883	128.9	-28.8469	128.9	-29.3203
128.9	617.793	128.8	507.086	129	316.127	129	104.858	129	-25.4719	129	-28.8469	129	-29.3203
129	618.421	128.9	507.415	129.1	316.394	129.1	104.987	129.1	-25.45	129.1	-28.8547	129.1	-29.332
129.1	618.989	129	507.78	129.2	316.632	129.2	105.098	129.2	-25.4407	129.2	-28.8547	129.2	-29.3445
129.2	619.605	129.1	508.141	129.3	316.846	129.3	105.217	129.3	-25.4304	129.3	-28.8664	129.3	-29.3633
129.3	620.233	129.2	508.501	129.4	317.081	129.4	105.331	129.4	-25.4258	129.4	-28.8695	129.4	-29.3711
129.4	620.813	129.3	508.926	129.5	317.314	129.5	105.436	129.5	-25.4304	129.5	-28.8828	129.5	-29.3828
129.5	621.383	129.4	509.324	129.6	317.534	129.6	105.562	129.6	-25.4094	129.6	-28.8859	129.6	-29.3976
129.6	621.973	129.5	509.7	129.7	317.776	129.7	105.698	129.7	-25.3992	129.7	-28.8976	129.7	-29.4102
129.7	622.543	129.6	510.106	129.8	318.004	129.8	105.792	129.8	-25.3867	129.8	-28.9086	129.8	-29.4219
129.8	623.109	129.7	510.484	129.9	318.241	129.9	105.921	129.9	-25.3789	129.9	-28.918	129.9	-29.4297
129.9	623.691	129.8	510.891	130	318.499	130	106.038	130	-25.3586	130	-28.9367	130	-29.4414
130	624.273	129.9	511.297	130.1	318.737	130.1	106.159	130.1	-25.3601	130.1	-28.9367	130.1	-29.4414
130.1	624.863	130	511.676	130.2	318.96	130.2	106.276	130.2	-25.3523	130.2	-28.9398	130.2	-29.4492
130.2	625.441	130.1	512.07	130.3	319.198	130.3	106.398	130.3	-25.343	130.3	-28.9445	130.3	-29.4492
130.3	626.028	130.2	512.418	130.4	319.475	130.4	106.508	130.4	-25.3406	130.4	-28.957	130.4	-29.4539
130.4	626.62	130.3	512.763	130.5	319.746	130.5	106.627	130.5	-25.3313	130.5	-28.9641	130.5	-29.4727
130.5	627.191	130.4	513.148	130.6	320.018	130.6	106.768	130.6	-25.3289	130.6	-28.9758	130.6	-29.4727
130.6	627.757	130.5	513.559	130.7	320.252	130.7	106.882	130.7	-25.3196	130.7	-28.9875	130.7	-29.4727
130.7	628.348	130.6	513.933	130.8	320.504	130.8	106.991	130.8	-25.3242	130.8	-28.9875	130.8	-29.4875
130.8	628.945	130.7	514.278	130.9	320.779	130.9	107.127	130.9	-25.321	130.9	-28.9953	130.9	-29.4922
130.9	629.547	130.8	514.61	131	321.031	131	107.238	131	-25.3093	131	-29.007	131	-29.5
131	630.12	130.9	514.98	131.1	321.342	131.1	107.346	131.1	-25.3118	131.1	-29.007	131.1	-29.5
131.1	630.684	131	515.365	131.2	321.577	131.2	107.456	131.2	-25.293	131.2	-29.0101	131.2	-29.5117
131.2	631.261	131.1	515.722	131.3	321.788	131.3	107.554	131.3	-25.3015	131.3	-29.0195	131.3	-29.5195
131.3	631.824	131.2	516.067	131.4	321.988	131.4	107.652	131.4	-25.2805	131.4	-29.0179	131.4	-29.5242
131.4	632.395	131.3	516.509	131.5	322.191	131.5	107.768	131.5	-25.2703	131.5	-29.0344	131.5	-29.543
131.5	632.965	131.4	516.907	131.6	322.417	131.6	107.882	131.6	-25.2625	131.6	-29.0422	131.6	-29.543
131.6	633.531	131.5	517.277	131.7	322.64	131.7	107.987	131.7	-25.261	131.7	-29.0422	131.7	-29.5508
131.7	634.113	131.6	517.688	131.8	322.905	131.8	108.084	131.8	-25.2539	131.8	-29.0539	131.8	-29.5625
131.8	634.676	131.7	518.059	131.9	323.167	131.9	108.195	131.9	-25.2507	131.9	-29.0508	131.9	-29.5656
131.9	635.234	131.8	518.372	132	323.409	132	108.312	132	-25.2415	132	-29.0492	132	-29.5781
132	635.797	131.9	518.706	132.1	323.691	132.1	108.436	132.1	-25.2195	132.1	-29.0617	132.1	-29.5898
132.1	636.373	132	519.095	132.2	323.931	132.2	108.57	132.2	-25.2031	132.2	-29.0734	132.2	-29.5945
132.2	636.941	132.1	519.362	132.3	324.176	132.3	108.695	132.3	-25.2	132.3	-29.0734	132.3	-29.6016
132.3	637.512	132.2	519.731	132.4	324.428	132.4	108.807	132.4	-25.1829	132.4	-29.0898	132.4	-29.6133
132.4	638.102	132.3	520.05	132.5	324.678	132.5	108.917	132.5	-25.1609	132.5	-29.1047	132.5	-29.6133
132.5	638.672	132.4	520.396	132.6	324.909	132.6	109.047	132.6	-25.1516	132.6	-29.1047	132.6	-29.6211
132.6	639.266	132.5	520.76	132.7	325.152	132.7	109.173	132.7	-25.1445	132.7	-29.1094	132.7	-29.6211
132.7	639.851	132.6	521.078	132.8	325.424	132.8	109.281	132.8	-25.1296	132.8	-29.1281	132.8	-29.6437
132.8	640.402	132.7	521.419	132.9	325.671	132.9	109.385	132.9	-25.1204	132.9	-29.1312	132.9	-29.6484
132.9	640.984	132.8	521.813	133	325.928	133	109.504	133	-25.1031	133	-29.1437	133	-29.6602
133	641.574	132.9	522.199	133.1	326.159	133.1	109.632	133.1	-25.1008	133.1	-29.1437	133.1	-29.6649
133.1	642.159	133	522.594	133.2	326.4	133.2	109.749	133.2	-25.0742	133.2	-29.1602	133.2	-29.6797
133.2	642.754	133.1	522.984	133.3	326.656	133.3	109.843	133.3	-25.0515	133.3	-29.1672	133.3	-29.6914
133.3	643.324	133.2	523.316	133.4	326.909	133.4	109.948	133.4	-25.0469	133.4	-29.1898	133.4	-29.6961
133.4	643.895	133.3	523.653	133.5	327.154	133.5	110.05	133.5	-25.0422	133.5	-29.1945	133.5	-29.7031
133.5	644.48	133.4	523.996	133.6	327.39	133.6	110.171	133.6	-25.0156	133.6	-29.2062	133.6	-29.7141
133.6	645.079	133.5	524.367	133.7	327.64	133.7	110.268	133.7	-24.989	133.7	-29.2141	133.7	-29.7188
133.7	645.648	133.6	524.741	133.8	327.902	133.8	110.354	133.8	-24.9766	133.8	-29.2141	133.8	-29.7188
133.8	646.249	133.7	525.091	133.9	328.138	133.9	110.468	133.9	-24.9617	133.9	-29.2305	133.9	-29.7234
133.9	646.798	133.8	525.426	134	328.363	134	110.589	134	-24.9524	134	-29.2453	134	-29.7422
134	647.402	133.9	525.778	134.1	328.616	134.1	110.698	134.1	-24.9531	134.1	-29.2601	134.1	-29.7422
134.1	647.958	134	526.14	134.2	328.846	134.2	110.839	134.2	-24.9382	134.2	-29.2726	134.2	-29.7453
134.2	648.534	134.1	526.481	134.3	329.07	134.3	110.98	134.3	-24.9453	134.3	-29.2891	134.3	-29.7617
134.3	649.102	134.2	526.848	134.4	329.268	134.4	111.105	134.4	-24.9336	134.4	-29.2961	134.4	-29.7695
134.4	649.688	134.3	527.22	134.5	329.499	134.5	111.217	134.5	-24.9421	134.5	-29.3086	134.5	-29.7695
134.5	650.285	134.4	527.618	134.6	329.73	134.6	111.343	134.6	-24.9375	134.6	-29.3273	134.6	-29.7859
134.6	650.859	134.5	528.008	134.7	329.97	134.7	111.499	134.7	-24.9407	134.7	-29.3273	134.7	-29.793
134.7	651.45	134.6	528.395	134.8	330.195	134.8	111.64	134.8	-24.9304	134.8	-29.3422	134.8	-29.8008
134.8	652.05	134.7	528.77	134.9	330.431	134.9	111.749	134.9	-24.9336	134.9	-29.3547	134.9	-29.8156
134.9	652.625	134.8	529.125	135	330.674	135	111.815	135	-24.9226	135	-29.3664	135	-29.8203
135	653.176	134.9	529.504	135.1	330.938	135.1	111.905	135.1	-24.9133	135.1	-29.3742	135.1	-29.8281
135.1	653.738	135	529.891	135.2	331.17	135.2	112.031	135.2	-24.8992	135.2	-29.3789	135.2	-29.8445
135.2	654.32	135.1	530.263	135.3	331.414	135.3	112.14	135.3	-24.8945	135.3	-29.3976	135.3	-29.8516
135.3	654.868	135.2	530.617	135.4	331.681	135.4	112.227	135.4	-24.8899	135.4	-29.4008	135.4	-29.8633
135.4	655.445	135.3	530.952	135.5	331.933	135.5	112.327	135.5	-24.8796	135.5	-29.425	135.5	-29.8711
135.5	655.991	135.4	531.294	135.6	332.155	135.6	112.405	135.6	-24.8718	135.6	-29.4328	135.6	-29.8758
135.6	656.538	135.5	531.617	135.7	332.421	135.7	112.526	135.7	-24.8704	135.7	-29.4492	135.7	-29.8976
135.7	657.113	135.6	531.965	135.8	332.655	135.8	112.648	135.8	-24.8601	135.8	-29.4562	135.8	-29.9149
135.8	657.667	135.7	532.282	135.9	332.89	135.9	112.769	135.9	-24.8625	135.9	-29.468	135.9	-29.9367
135.9	658.223	135.8	532.632	136	333.135	136	112.895	136	-24.8523	136	-29.4758	136	-29.9492
136	658.793	135.9	533.02	136.1	333.374	136.1	112.999	136.1	-24.8438	136.1	-29.4875	136.1	-29.9656
136.1	659.38	136	533.383	136.2	333.617	136.2	113.096	136.2	-24.8359	136.2	-29.4953	136.2	-29.9727
136.2	659.963	136.1	533.739	136.3	333.854	136.3	113.207	136.3	-24.8196	136.3	-29.507	136.3	-29.9836
136.3	660.528	136.2	534.109	136.4	334.113	136.4	113.327	136.4	-24.8093	136.4	-29.5148	136.4	-30.0047
136.4	661.086	136.3	534.466	136.5	334.346	136.5	113.452	136.5	-24.8015	136.5	-29.5266	136.5	-30.0234
136.5	661.64	136.4	534.843	136.6	334.624	136.6	113.557	136.6	-24.7922	136.6	-29.5266	136.6	-30.0344
136.6	662.203	136.5	535.18	136.7	334.863	136.7	113.691	136.7	-24.793	136.7	-29.5414	136.7	-30.0508
136.7	662.781	136.6	535.535	136.8	335.088	136.8	113.788	136.8	-24.7852	136.8	-29.5539	136.8	-30.0633
136.8	663.344	136.7	535.906	136.9	335.327	136.9	113.89	136.9	-24.7703	136.9	-29.5656	136.9	-30.082
136.9	663.926	136.8	536.234	137	335.565	137	113.991	137	-24.761	137	-29.5734	137	-30.082
137	664.48	136.9	536.606	137.1	335.792	137.1	114.081	137.1	-24.739	137.1	-29.5898	137.1	-30.0898
137.1	665.043	137	536.981	137.2	336.026	137.2	114.183	137.2	-24.7297	137.2	-29.6047	137.2	-30.1063
137.2	665.605	137.1	537.313	137.3	336.295	137.3	114.307	137.3	-24.7078	137.3	-29.6164	137.3	-30.1164
137.3	666.171	137.2	537.668	137.4	336.531	137.4	114.421	137.4	-24.7031	137.4	-29.6242	137.4	-30.1406
137.4	666.723	137.3	538.03	137.5	336.808	137.5	114.526	137.5	-24.7	137.5	-29.6359	137.5	-30.1453
137.5	667.308	137.4	538.399	137.6	337.011	137.6	114.647	137.6	-24.6907	137.6	-29.6429	137.6	-30.1523
137.6	667.868	137.5	538.802	137.7	337.241	137.7	114.754	137.7	-24.6687	137.7	-29.6437	137.7	-30.1555
137.7	668.429	137.6	539.176	137.8	337.487	137.8	114.858	137.8	-24.6594	137.8	-29.6555	137.8	-30.1797
137.8	668.973	137.7	539.555	137.9	337.722	137.9	114.975	137.9	-24.6492	137.9	-29.6633	137.9	-30.1797
137.9	669.519	137.8	539.926	138	337.975	138	115.086	138	-24.6296	138	-29.6633	138	-30.1914
138	670.043	137.9	540.273	138.1	338.237	138.1	115.222	138.1	-24.6204	138.1	-29.675	138.1	-30.1961
138.1	670.61	138	540.623	138.2	338.472	138.2	115.363	138.2	-24.6218	138.2	-29.6719	138.2	-30.2109
138.2	671.171	138.1	540.972	138.3	338.71	138.3	115.47	138.3	-24.6125	138.3	-29.6781	138.3	-30.2227
138.3	671.715	138.2	541.348	138.4	338.931	138.4	115.598	138.4	-24.5977	138.4	-29.6945	138.4	-30.2305
138.4	672.269	138.3	541.692	138.5	339.159	138.5	115.725	138.5	-24.5789	138.5	-29.7023	138.5	-30.2453
138.5	672.829	138.4	542.03	138.6	339.421	138.6	115.87	138.6	-24.5696	138.6	-29.7023	138.6	-30.2664
138.6	673.363	138.5	542.36	138.7	339.686	138.7	116.011	138.7	-24.5593	138.7	-29.7141	138.7	-30.2813
138.7	673.917	138.6	542.695	138.8	339.924	138.8	116.155	138.8	-24.55	138.8	-29.7227	138.8	-30.3008
138.8	674.509	138.7	543.027	138.9	340.171	138.9	116.32	138.9	-24.5398	138.9	-29.7258	138.9	-30.3008
138.9	675.094	138.8	543.36	139	340.405	139	116.409	139	-24.5273	139	-29.7375	139	-30.3125
139	675.664	138.9	543.664	139.1	340.64	139.1	116.506	139.1	-24.5078	139.1	-29.7375	139.1	-30.3234
139.1	676.233	139	544.02	139.2	340.882	139.2	116.62	139.2	-24.4961	139.2	-29.7453	139.2	-30.3398
139.2	676.813	139.1	544.398	139.3	341.119	139.3	116.761	139.3	-24.489	139.3	-29.757	139.3	-30.3398
139.3	677.383	139.2	544.738	139.4	341.355	139.4	116.882	139.4	-24.4797	139.4	-29.7766	139.4	-30.3477
139.4	677.941	139.3	545.086	139.5	341.603	139.5	116.967	139.5	-24.4812	139.5	-29.7836	139.5	-30.3594
139.5	678.488	139.4	545.457	139.6	341.834	139.6	117.065	139.6	-24.457	139.6	-29.7766	139.6	-30.3789
139.6	679.043	139.5	545.821	139.7	342.094	139.7	117.176	139.7	-24.4407	139.7	-29.7844	139.7	-30.3789
139.7	679.613	139.6	546.159	139.8	342.334	139.8	117.281	139.8	-24.4336	139.8	-29.7961	139.8	-30.3789
139.8	680.159	139.7	546.513	139.9	342.57	139.9	117.409	139.9	-24.4304	139.9	-29.8039	139.9	-30.3789
139.9	680.708	139.8	546.867	140	342.815	140	117.519	140	-24.4226	140	-29.8156	140	-30.3906
140	681.261	139.9	547.231	140.1	343.07	140.1	117.635	140.1	-24.4133	140.1	-29.8234	140.1	-30.3953
140.1	681.824	140	547.601	140.2	343.331	140.2	117.749	140.2	-24.4023	140.2	-29.8351	140.2	-30.4102
140.2	682.383	140.1	547.918	140.3	343.581	140.3	117.87	140.3	-24.3992	140.3	-29.843	140.3	-30.4219
140.3	682.934	140.2	548.247	140.4	343.841	140.4	117.967	140.4	-24.3984	140.4	-29.8547	140.4	-30.4219
140.4	683.484	140.3	548.622	140.5	344.094	140.5	118.074	140.5	-24.3867	140.5	-29.8664	140.5	-30.4219
140.5	684.043	140.4	548.952	140.6	344.338	140.6	118.198	140.6	-24.3796	140.6	-29.8742	140.6	-30.4344
140.6	684.605	140.5	549.285	140.7	344.596	140.7	118.312	140.7	-24.3704	140.7	-29.8937	140.7	-30.4531
140.7	685.159	140.6	549.649	140.8	344.82	140.8	118.397	140.8	-24.3601	140.8	-29.8937	140.8	-30.4562
140.8	685.715	140.7	550.013	140.9	345.062	140.9	118.495	140.9	-24.3508	140.9	-29.9055	140.9	-30.4609
140.9	686.266	140.8	550.355	141	345.299	141	118.617	141	-24.3406	141	-29.9297	141	-30.4688
141	686.82	140.9	550.703	141.1	345.531	141.1	118.722	141.1	-24.3359	141.1	-29.9445	141.1	-30.4852
141.1	687.375	141	551.044	141.2	345.768	141.2	118.827	141.2	-24.3313	141.2	-29.9562	141.2	-30.4922
141.2	687.914	141.1	551.39	141.3	346.021	141.3	118.913	141.3	-24.3164	141.3	-29.9633	141.3	-30.4922
141.3	688.453	141.2	551.747	141.4	346.266	141.4	119.021	141.4	-24.3015	141.4	-29.9688	141.4	-30.4922
141.4	688.984	141.3	552.125	141.5	346.499	141.5	119.125	141.5	-24.282	141.5	-29.9875	141.5	-30.4992
141.5	689.555	141.4	552.47	141.6	346.745	141.6	119.225	141.6	-24.2805	141.6	-30.007	141.6	-30.5047
141.6	690.104	141.5	552.851	141.7	346.968	141.7	119.334	141.7	-24.2703	141.7	-30.0148	141.7	-30.5117
141.7	690.68	141.6	553.224	141.8	347.198	141.8	119.445	141.8	-24.261	141.8	-30.0383	141.8	-30.5234
141.8	691.215	141.7	553.581	141.9	347.444	141.9	119.557	141.9	-24.2507	141.9	-30.0461	141.9	-30.5234
141.9	691.766	141.8	553.934	142	347.676	142	119.667	142	-24.2461	142	-30.0578	142	-30.5187
142	692.343	141.9	554.302	142.1	347.917	142.1	119.777	142.1	-24.2297	142.1	-30.0656	142.1	-30.5195
142.1	692.883	142	554.667	142.2	348.143	142.2	119.885	142.2	-24.2195	142.2	-30.0851	142.2	-30.5359
142.2	693.445	142.1	555.028	142.3	348.358	142.3	120.011	142.3	-24.2	142.3	-30.0969	142.3	-30.543
142.3	693.995	142.2	555.375	142.4	348.553	142.4	120.147	142.4	-24.1907	142.4	-30.1164	142.4	-30.5539
142.4	694.563	142.3	555.72	142.5	348.781	142.5	120.246	142.5	-24.1758	142.5	-30.1164	142.5	-30.5703
142.5	695.121	142.4	556.074	142.6	348.999	142.6	120.349	142.6	-24.1687	142.6	-30.1312	142.6	-30.5867
142.6	695.652	142.5	556.43	142.7	349.237	142.7	120.465	142.7	-24.1563	142.7	-30.1437	142.7	-30.6016
142.7	696.184	142.6	556.763	142.8	349.472	142.8	120.565	142.8	-24.1531	142.8	-30.175	142.8	-30.6133
142.8	696.734	142.7	557.093	142.9	349.701	142.9	120.691	142.9	-24.1321	142.9	-30.1828	142.9	-30.6242
142.9	697.273	142.8	557.426	143	349.906	143	120.812	143	-24.125	143	-30.1945	143	-30.6406
143	697.793	142.9	557.783	143.1	350.123	143.1	120.921	143.1	-24.1218	143.1	-30.2023	143.1	-30.6406
143.1	698.339	143	558.152	143.2	350.348	143.2	121.029	143.2	-24.1204	143.2	-30.2227	143.2	-30.6649
143.2	698.883	143.1	558.481	143.3	350.564	143.3	121.164	143.3	-24.0984	143.3	-30.2258	143.3	-30.6719
143.3	699.409	143.2	558.824	143.4	350.788	143.4	121.276	143.4	-24.0859	143.4	-30.2453	143.4	-30.6797
143.4	699.922	143.3	559.192	143.5	351.031	143.5	121.367	143.5	-24.0906	143.5	-30.2601	143.5	-30.6914
143.5	700.434	143.4	559.55	143.6	351.268	143.6	121.479	143.6	-24.0735	143.6	-30.2695	143.6	-30.6961
143.6	700.984	143.5	559.888	143.7	351.495	143.7	121.577	143.7	-24.0593	143.7	-30.2766	143.7	-30.7148
143.7	701.531	143.6	560.234	143.8	351.738	143.8	121.691	143.8	-24.05	143.8	-30.2992	143.8	-30.7148
143.8	702.082	143.7	560.594	143.9	351.999	143.9	121.839	143.9	-24.0398	143.9	-30.3203	143.9	-30.7258
143.9	702.645	143.8	560.938	144	352.217	144	121.941	144	-24.0305	144	-30.3273	144	-30.7305
144	703.203	143.9	561.263	144.1	352.433	144.1	122.05	144.1	-24.0313	144.1	-30.35	144.1	-30.7422
144.1	703.73	144	561.59	144.2	352.65	144.2	122.171	144.2	-24.0398	144.2	-30.3625	144.2	-30.7422
144.2	704.27	144.1	561.934	144.3	352.859	144.3	122.271	144.3	-24.0234	144.3	-30.3828	144.3	-30.75
144.3	704.808	144.2	562.302	144.4	353.101	144.4	122.395	144.4	-24.0273	144.4	-30.3859	144.4	-30.7547
144.4	705.37	144.3	562.632	144.5	353.334	144.5	122.503	144.5	-24.0125	144.5	-30.4055	144.5	-30.7734
144.5	705.941	144.4	562.95	144.6	353.581	144.6	122.601	144.6	-24.011	144.6	-30.4172	144.6	-30.793
144.6	706.504	144.5	563.3	144.7	353.82	144.7	122.729	144.7	-24.0007	144.7	-30.425	144.7	-30.793
144.7	707.055	144.6	563.634	144.8	354.057	144.8	122.839	144.8	-24.0039	144.8	-30.4367	144.8	-30.8156
144.8	707.594	144.7	563.965	144.9	354.295	144.9	122.948	144.9	-24.0007	144.9	-30.4562	144.9	-30.832
144.9	708.125	144.8	564.305	145	354.531	145	123.026	145	-24.0032	145	-30.4562	145	-30.8516
145	708.664	144.9	564.645	145.1	354.773	145.1	123.14	145.1	-23.9961	145.1	-30.4562	145.1	-30.8516
145.1	709.213	145	565.009	145.2	355.026	145.2	123.246	145.2	-24.0007	145.2	-30.4758	145.2	-30.8641
145.2	709.754	145.1	565.364	145.3	355.253	145.3	123.327	145.3	-23.9883	145.3	-30.4758	145.3	-30.8828
145.3	710.29	145.2	565.683	145.4	355.463	145.4	123.441	145.4	-23.9766	145.4	-30.4875	145.4	-30.8828
145.4	710.839	145.3	565.997	145.5	355.674	145.5	123.506	145.5	-23.9719	145.5	-30.4984	145.5	-30.8906
145.5	711.363	145.4	566.356	145.6	355.917	145.6	123.609	145.6	-23.9695	145.6	-30.5	145.6	-30.9023
145.6	711.875	145.5	566.7	145.7	356.159	145.7	123.725	145.7	-23.9648	145.7	-30.507	145.7	-30.9219
145.7	712.417	145.6	567.035	145.8	356.39	145.8	123.839	145.8	-23.9617	145.8	-30.5101	145.8	-30.9219
145.8	712.953	145.7	567.383	145.9	356.638	145.9	123.921	145.9	-23.957	145.9	-30.5226	145.9	-30.9336
145.9	713.499	145.8	567.727	146	356.878	146	124.019	146	-23.957	146	-30.5344	146	-30.9562
146	714.043	145.9	568.071	146.1	357.116	146.1	124.135	146.1	-23.9407	146.1	-30.5461	146.1	-30.9578
146.1	714.594	146	568.402	146.2	357.359	146.2	124.206	146.2	-23.9304	146.2	-30.5508	146.2	-30.9641
146.2	715.145	146.1	568.734	146.3	357.612	146.3	124.3	146.3	-23.9258	146.3	-30.5578	146.3	-30.9805
146.3	715.703	146.2	569.044	146.4	357.89	146.4	124.395	146.4	-23.9304	146.4	-30.5656	146.4	-30.9805
146.4	716.266	146.3	569.387	146.5	358.109	146.5	124.503	146.5	-23.9211	146.5	-30.5773	146.5	-30.9883
146.5	716.805	146.4	569.746	146.6	358.292	146.6	124.627	146.6	-23.9109	146.6	-30.5773	146.6	-31
146.6	717.363	146.5	570.091	146.7	358.495	146.7	124.73	146.7	-23.8984	146.7	-30.5804	146.7	-31
146.7	717.917	146.6	570.445	146.8	358.706	146.8	124.838	146.8	-23.8899	146.8	-30.5851	146.8	-31.0117
146.8	718.504	146.7	570.773	146.9	358.913	146.9	124.929	146.9	-23.875	146.9	-30.593	146.9	-31.0242
146.9	719.043	146.8	571.13	147	359.124	147	125.05	147	-23.8601	147	-30.6047	147	-31.0313
147	719.582	146.9	571.477	147.1	359.339	147.1	125.183	147.1	-23.8508	147.1	-30.6164	147.1	-31.0313
[truncated: 8,142 more rows]
