# Supplementary material for: Mutational phospho-mimicry reveals a regulatory role for the XRCC4 and XLF C-terminal tails in modulating DNA bridging during classical non-homologous end joining
Source: eLife journal article supplement (doi:10.7554/elife.22900), 2017-05-13
Supplement: supp [file elife-22900-supp-v1.zip › elife_poa_e22900_Figure_8_source_data_2.txt.txt]

Time	XLF-WT_4uM	Time	XLF-WT_2uM	Time	XLF-WT_1uM	Time	XLF-WT_0.5uM	Time	XLF-WT_0.25uM	Time	XLF-WT_0.125uM	Time	XLF-WT_0.0625uM	Time	XLF-WT_0.03125uM
s	RU	s	RU	s	RU	s	RU	s	RU	s	RU	s	RU	s	RU
-52.6	2.92499	-52.6	2.84766	-52.6	3.05389	-52.7	2.87891	-52.7	3.24219	-52.6	3.56329	-52.6	3.52655	-52.6	3.44611
-52.5	2.83514	-52.5	2.76953	-52.5	3.02655	-52.6	2.85938	-52.6	3.23047	-52.5	3.56329	-52.5	3.53436	-52.5	3.46564
-52.4	2.78436	-52.4	2.78906	-52.4	3.06561	-52.5	2.8125	-52.5	3.23047	-52.4	3.54376	-52.4	3.53436	-52.4	3.44611
-52.3	2.7453	-52.3	2.79688	-52.3	3.05389	-52.4	2.78906	-52.4	3.17188	-52.3	3.48517	-52.3	3.53436	-52.3	3.42657
-52.2	2.68671	-52.2	2.76953	-52.2	3.06561	-52.3	2.75	-52.3	3.16016	-52.2	3.4422	-52.2	3.50311	-52.2	3.40314
-52.1	2.63593	-52.1	2.75	-52.1	3.04608	-52.2	2.72266	-52.2	3.14063	-52.1	3.41486	-52.1	3.4953	-52.1	3.37579
-52	2.61639	-52	2.75	-52	3.05389	-52.1	2.67969	-52.1	3.12109	-52	3.36407	-52	3.50311	-52	3.34454
-51.9	2.59686	-51.9	2.73828	-51.9	3.04608	-52	2.66016	-52	3.08984	-51.9	3.34454	-51.9	3.4953	-51.9	3.32501
-51.8	2.57733	-51.8	2.73047	-51.8	3.02655	-51.9	2.64063	-51.9	3.0625	-51.8	3.31329	-51.8	3.46405	-51.8	3.30548
-51.7	2.54608	-51.7	2.71875	-51.7	3.01483	-51.8	2.62891	-51.8	3.05078	-51.7	3.29376	-51.7	3.44452	-51.7	3.29376
-51.6	2.52655	-51.6	2.6875	-51.6	2.9953	-51.7	2.60156	-51.7	3.01953	-51.6	3.2547	-51.6	3.4328	-51.6	3.27423
-51.5	2.50702	-51.5	2.66797	-51.5	2.96405	-51.6	2.58984	-51.6	3	-51.5	3.22345	-51.5	3.41327	-51.5	3.2547
-51.4	2.46796	-51.4	2.66016	-51.4	2.93671	-51.5	2.58984	-51.5	2.97266	-51.4	3.20392	-51.4	3.40546	-51.4	3.22345
-51.3	2.43671	-51.3	2.64063	-51.3	2.91718	-51.4	2.57031	-51.4	2.95313	-51.3	3.18439	-51.3	3.38593	-51.3	3.20392
-51.2	2.40546	-51.2	2.62891	-51.2	2.89374	-51.3	2.55078	-51.3	2.92188	-51.2	3.16486	-51.2	3.35468	-51.2	3.18439
-51.1	2.37811	-51.1	2.60938	-51.1	2.87421	-51.2	2.53125	-51.2	2.90234	-51.1	3.14532	-51.1	3.34296	-51.1	3.15314
-51	2.34686	-51	2.58984	-51	2.85468	-51.1	2.51172	-51.1	2.88281	-51	3.12579	-51	3.31561	-51	3.13361
-50.9	2.31561	-50.9	2.57031	-50.9	2.83514	-51	2.5	-51	2.86328	-50.9	3.09454	-50.9	3.30389	-50.9	3.10626
-50.8	2.28436	-50.8	2.54688	-50.8	2.81561	-50.9	2.48047	-50.9	2.83984	-50.8	3.08282	-50.8	3.27655	-50.8	3.07501
-50.7	2.25702	-50.7	2.53906	-50.7	2.80389	-50.8	2.46094	-50.8	2.82031	-50.7	3.06329	-50.7	3.26483	-50.7	3.05548
-50.6	2.22577	-50.6	2.50781	-50.6	2.78436	-50.7	2.44141	-50.7	2.80078	-50.6	3.04376	-50.6	3.2453	-50.6	3.03595
-50.5	2.18671	-50.5	2.5	-50.5	2.76483	-50.6	2.42969	-50.6	2.76953	-50.5	3.02423	-50.5	3.22577	-50.5	3.01642
-50.4	2.16718	-50.4	2.48047	-50.4	2.7453	-50.5	2.41016	-50.5	2.76172	-50.4	3.0047	-50.4	3.20624	-50.4	2.98517
-50.3	2.14764	-50.3	2.46875	-50.3	2.72577	-50.4	2.39063	-50.4	2.75	-50.3	2.99298	-50.3	3.1828	-50.3	2.95392
-50.2	2.11639	-50.2	2.4375	-50.2	2.70624	-50.3	2.37109	-50.3	2.73047	-50.2	2.97345	-50.2	3.15546	-50.2	2.93439
-50.1	2.06561	-50.1	2.42969	-50.1	2.68671	-50.2	2.35938	-50.2	2.71094	-50.1	2.95392	-50.1	3.12421	-50.1	2.91486
-50	2.04608	-50	2.41797	-50	2.66718	-50.1	2.33984	-50.1	2.70313	-50	2.93439	-50	3.10468	-50	2.89532
-49.9	2.00702	-49.9	2.39844	-49.9	2.64374	-50	2.32031	-50	2.67969	-49.9	2.92267	-49.9	3.07343	-49.9	2.87579
-49.8	1.96014	-49.8	2.39142	-49.8	2.62109	-49.9	2.31641	-49.9	2.66016	-49.8	2.88672	-49.8	3.03046	-49.8	2.86487
-49.7	1.90546	-49.7	2.41095	-49.7	2.58905	-49.8	2.33282	-49.8	2.66016	-49.7	2.84222	-49.7	2.95233	-49.7	2.88831
-49.6	1.92108	-49.6	2.41327	-49.6	2.54529	-49.7	2.33514	-49.7	2.64532	-49.6	2.85938	-49.6	2.88123	-49.6	2.89063
-49.5	1.9328	-49.5	2.40314	-49.5	2.48749	-49.6	2.33282	-49.6	2.63983	-49.5	2.85706	-49.5	2.86719	-49.5	2.85626
-49.4	1.90314	-49.4	2.39844	-49.4	2.46094	-49.5	2.32031	-49.5	2.62189	-49.4	2.86407	-49.4	2.84686	-49.4	2.82581
-49.3	1.90076	-49.3	2.40314	-49.3	2.44061	-49.4	2.30548	-49.4	2.64532	-49.3	2.87659	-49.3	2.81561	-49.3	2.82501
-49.2	1.88593	-49.2	2.38593	-49.2	2.42029	-49.3	2.30389	-49.3	2.62811	-49.2	2.87579	-49.2	2.77966	-49.2	2.81018
-49.1	1.85156	-49.1	2.37109	-49.1	2.39453	-49.2	2.28125	-49.2	2.60626	-49.1	2.85626	-49.1	2.75311	-49.1	2.78125
-49	1.82733	-49	2.35156	-49	2.37811	-49.1	2.26642	-49.1	2.59686	-49	2.84766	-49	2.73828	-49	2.77423
-48.9	1.81091	-48.9	2.32813	-48.9	2.3703	-49	2.26483	-49	2.59454	-48.9	2.85236	-48.9	2.70935	-48.9	2.76251
-48.8	1.78906	-48.8	2.32501	-48.8	2.36169	-48.9	2.2547	-48.9	2.58514	-48.8	2.84924	-48.8	2.6875	-48.8	2.7547
-48.7	1.77655	-48.7	2.31561	-48.7	2.35156	-48.8	2.2453	-48.8	2.58673	-48.7	2.85236	-48.7	2.67029	-48.7	2.73987
-48.6	1.77344	-48.6	2.30078	-48.6	2.33905	-48.7	2.23517	-48.7	2.58203	-48.6	2.84454	-48.6	2.65625	-48.6	2.71875
-48.5	1.75232	-48.5	2.29688	-48.5	2.33514	-48.6	2.21405	-48.6	2.57031	-48.5	2.84454	-48.5	2.64374	-48.5	2.70862
-48.4	1.73358	-48.4	2.28906	-48.4	2.32263	-48.5	2.20392	-48.5	2.55859	-48.4	2.84924	-48.4	2.62421	-48.4	2.68439
-48.3	1.71875	-48.3	2.27423	-48.3	2.30548	-48.4	2.19611	-48.4	2.55548	-48.3	2.83984	-48.3	2.60938	-48.3	2.66486
-48.2	1.71405	-48.2	2.26483	-48.2	2.29138	-48.3	2.18671	-48.3	2.54297	-48.2	2.83282	-48.2	2.58826	-48.2	2.66956
-48.1	1.71094	-48.1	2.26251	-48.1	2.28125	-48.2	2.18439	-48.2	2.52655	-48.1	2.82971	-48.1	2.57031	-48.1	2.66016
-48	1.70154	-48	2.2547	-48	2.27185	-48.1	2.17499	-48.1	2.51642	-48	2.82031	-48	2.53436	-48	2.65314
-47.9	1.67499	-47.9	2.23358	-47.9	2.26172	-48	2.15314	-48	2.51172	-47.9	2.81799	-47.9	2.52264	-47.9	2.65314
-47.8	1.67499	-47.8	2.22345	-47.8	2.2406	-47.9	2.14374	-47.9	2.4953	-47.8	2.80548	-47.8	2.51483	-47.8	2.65002
-47.7	1.66327	-47.7	2.21405	-47.7	2.23047	-47.8	2.13361	-47.8	2.48517	-47.7	2.78595	-47.7	2.50311	-47.7	2.64532
-47.6	1.65314	-47.6	2.21564	-47.6	2.22107	-47.7	2.13672	-47.7	2.48828	-47.6	2.76642	-47.6	2.5	-47.6	2.63049
-47.5	1.64764	-47.5	2.20233	-47.5	2.19922	-47.6	2.13361	-47.6	2.49689	-47.5	2.7594	-47.5	2.48358	-47.5	2.61798
-47.4	1.63123	-47.4	2.1922	-47.4	2.19141	-47.5	2.13593	-47.5	2.48749	-47.4	2.75	-47.4	2.46716	-47.4	2.60626
-47.3	1.62421	-47.3	2.19452	-47.3	2.18671	-47.4	2.12579	-47.4	2.48517	-47.3	2.73987	-47.3	2.44922	-47.3	2.60156
-47.2	1.60938	-47.2	2.18439	-47.2	2.18201	-47.3	2.11639	-47.3	2.47577	-47.2	2.71875	-47.2	2.44922	-47.2	2.58752
-47.1	1.58984	-47.1	2.18439	-47.1	2.16327	-47.2	2.10236	-47.2	2.46564	-47.1	2.72034	-47.1	2.43982	-47.1	2.57501
-47	1.58514	-47	2.17499	-47	2.14844	-47.1	2.08984	-47.1	2.45624	-47	2.69922	-47	2.42578	-47	2.5719
-46.9	1.57733	-46.9	2.16486	-46.9	2.14374	-47	2.08984	-47	2.45392	-46.9	2.6922	-46.9	2.4328	-46.9	2.5625
-46.8	1.56561	-46.8	2.16327	-46.8	2.14063	-46.9	2.07031	-46.9	2.44611	-46.8	2.67737	-46.8	2.42499	-46.8	2.54065
-46.7	1.55389	-46.7	2.15314	-46.7	2.13593	-46.8	2.07501	-46.8	2.44843	-46.7	2.66797	-46.7	2.41327	-46.7	2.51953
-46.6	1.53906	-46.6	2.14374	-46.6	2.11639	-46.7	2.07031	-46.7	2.44611	-46.6	2.65002	-46.6	2.39844	-46.6	2.5094
-46.5	1.53436	-46.5	2.14142	-46.5	2.10779	-46.6	2.07343	-46.6	2.43671	-46.5	2.63049	-46.5	2.39374	-46.5	2.49298
-46.4	1.53436	-46.4	2.13361	-46.4	2.12109	-46.5	2.06329	-46.5	2.4375	-46.4	2.62891	-46.4	2.39374	-46.4	2.48987
-46.3	1.53125	-46.3	2.12421	-46.3	2.11639	-46.4	2.05859	-46.4	2.44611	-46.3	2.61877	-46.3	2.38593	-46.3	2.48047
-46.2	1.52966	-46.2	2.12579	-46.2	2.11639	-46.3	2.05859	-46.3	2.43671	-46.2	2.60938	-46.2	2.37421	-46.2	2.47345
-46.1	1.53436	-46.1	2.11639	-46.1	2.10468	-46.2	2.05548	-46.2	2.43439	-46.1	2.59924	-46.1	2.36249	-46.1	2.47034
-46	1.54688	-46	2.10236	-46	2.10938	-46.1	2.05389	-46.1	2.42657	-46	2.58984	-46	2.34766	-46	2.46094
-45.9	1.55389	-45.9	2.09296	-45.9	2.10468	-46	2.03595	-46	2.43671	-45.9	2.57269	-45.9	2.34296	-45.9	2.45392
-45.8	1.55859	-45.8	2.09454	-45.8	2.10468	-45.9	2.02734	-45.9	2.42657	-45.8	2.57031	-45.8	2.33514	-45.8	2.45081
-45.7	1.56561	-45.7	2.08514	-45.7	2.10156	-45.8	2.03595	-45.8	2.42499	-45.7	2.56018	-45.7	2.33124	-45.7	2.4422
-45.6	1.57343	-45.6	2.08752	-45.6	2.09686	-45.7	2.03125	-45.7	2.41486	-45.6	2.55078	-45.6	2.32343	-45.6	2.43439
-45.5	1.57343	-45.5	2.07343	-45.5	2.09686	-45.6	2.02655	-45.6	2.41718	-45.5	2.52893	-45.5	2.32343	-45.5	2.43127
-45.4	1.57343	-45.4	2.05548	-45.4	2.08514	-45.5	2.0047	-45.5	2.40704	-45.4	2.50781	-45.4	2.33124	-45.4	2.42267
-45.3	1.57031	-45.3	2.05859	-45.3	2.08984	-45.4	2.00781	-45.4	2.39532	-45.3	2.49768	-45.3	2.33594	-45.3	2.42267
-45.2	1.56561	-45.2	2.05389	-45.2	2.09216	-45.3	2.00781	-45.3	2.39764	-45.2	2.48828	-45.2	2.33124	-45.2	2.43127
-45.1	1.57031	-45.1	2.04376	-45.1	2.07343	-45.2	2.00781	-45.2	2.39844	-45.1	2.46643	-45.1	2.32343	-45.1	2.42188
-45	1.57263	-45	2.03436	-45	2.07031	-45.1	2.0047	-45.1	2.40704	-45	2.45862	-45	2.32343	-45	2.40314
-44.9	1.57031	-44.9	2.03204	-44.9	2.07031	-45	1.9953	-45	2.41718	-44.9	2.44611	-44.9	2.31329	-44.9	2.40314
-44.8	1.55389	-44.8	2.01642	-44.8	2.07263	-44.9	1.98828	-44.9	2.40704	-44.8	2.44141	-44.8	2.31561	-44.8	2.40002
-44.7	1.55389	-44.7	2	-44.7	2.07343	-44.8	1.97345	-44.8	2.40546	-44.7	2.41956	-44.7	2.31091	-44.7	2.39532
-44.6	1.55389	-44.6	1.98047	-44.6	2.07813	-44.7	1.96405	-44.7	2.40704	-44.6	2.41797	-44.6	2.28906	-44.6	2.39221
-44.5	1.53906	-44.5	1.96405	-44.5	2.08044	-44.6	1.95862	-44.6	2.39532	-44.5	2.40784	-44.5	2.29218	-44.5	2.36407
-44.4	1.53436	-44.4	1.95392	-44.4	2.06329	-44.5	1.94922	-44.5	2.38281	-44.4	2.39532	-44.4	2.29218	-44.4	2.35938
-44.3	1.53436	-44.3	1.95233	-44.3	2.06561	-44.4	1.94922	-44.4	2.36328	-44.3	2.38361	-44.3	2.29218	-44.3	2.34454
-44.2	1.53436	-44.2	1.9469	-44.2	2.06561	-44.3	1.94141	-44.3	2.34686	-44.2	2.37579	-44.2	2.28436	-44.2	2.32971
-44.1	1.53125	-44.1	1.94452	-44.1	2.06091	-44.2	1.92499	-44.2	2.34454	-44.1	2.36096	-44.1	2.28436	-44.1	2.32501
-44	1.52185	-44	1.94611	-44	2.07031	-44.1	1.90784	-44.1	2.35156	-44	2.34454	-44	2.27264	-44	2.32971
-43.9	1.53125	-43.9	1.9328	-43.9	2.07031	-44	1.91016	-44	2.33514	-43.9	2.33282	-43.9	2.26953	-43.9	2.32031
-43.8	1.52655	-43.8	1.93439	-43.8	2.07263	-43.9	1.91016	-43.9	2.34454	-43.8	2.34454	-43.8	2.27264	-43.8	2.31329
-43.7	1.52655	-43.7	1.92499	-43.7	2.07031	-43.8	1.92499	-43.8	2.33984	-43.7	2.35236	-43.7	2.27264	-43.7	2.31018
-43.6	1.53436	-43.6	1.92267	-43.6	2.07263	-43.7	1.91486	-43.7	2.33673	-43.6	2.35236	-43.6	2.27655	-43.6	2.31329
-43.5	1.53436	-43.5	1.91327	-43.5	2.07031	-43.6	1.91327	-43.6	2.32733	-43.5	2.35236	-43.5	2.25781	-43.5	2.31329
-43.4	1.53906	-43.4	1.90784	-43.4	2.04608	-43.5	1.89532	-43.5	2.3172	-43.4	2.35236	-43.4	2.26013	-43.4	2.32971
-43.3	1.53125	-43.3	1.90546	-43.3	2.04608	-43.4	1.88672	-43.4	2.3125	-43.3	2.34222	-43.3	2.25781	-43.3	2.32501
-43.2	1.51483	-43.2	1.89532	-43.2	2.04297	-43.3	1.89532	-43.3	2.3125	-43.2	2.34454	-43.2	2.25311	-43.2	2.32501
-43.1	1.50232	-43.1	1.88593	-43.1	2.04608	-43.2	1.89063	-43.2	2.28906	-43.1	2.33984	-43.1	2.25311	-43.1	2.32501
-43	1.48047	-43	1.87579	-43	2.04138	-43.1	1.89374	-43.1	2.28125	-43	2.33282	-43	2.25311	-43	2.3219
-42.9	1.45935	-42.9	1.85938	-42.9	2.03436	-43	1.88672	-43	2.26642	-42.9	2.33282	-42.9	2.25781	-42.9	2.3172
-42.8	1.44141	-42.8	1.85938	-42.8	2.01953	-42.9	1.88361	-42.9	2.25702	-42.8	2.33752	-42.8	2.25311	-42.8	2.30548
-42.7	1.42499	-42.7	1.84454	-42.7	2.01172	-42.8	1.87579	-42.8	2.24689	-42.7	2.33282	-42.7	2.24841	-42.7	2.30548
-42.6	1.41327	-42.6	1.84766	-42.6	2.00232	-42.7	1.86639	-42.7	2.22266	-42.6	2.32971	-42.6	2.25	-42.6	2.29376
-42.5	1.40546	-42.5	1.83984	-42.5	1.99219	-42.6	1.85626	-42.6	2.20624	-42.5	2.32031	-42.5	2.23358	-42.5	2.28906
-42.4	1.39374	-42.4	1.84296	-42.4	1.98279	-42.5	1.84766	-42.5	2.19611	-42.4	2.31018	-42.4	2.23358	-42.4	2.28363
-42.3	1.39374	-42.3	1.84454	-42.3	1.96405	-42.4	1.84766	-42.4	2.18671	-42.3	2.30548	-42.3	2.23828	-42.3	2.28906
-42.2	1.38361	-42.2	1.83984	-42.2	1.96094	-42.3	1.84454	-42.3	2.17969	-42.2	2.30157	-42.2	2.2453	-42.2	2.29065
-42.1	1.38593	-42.1	1.83594	-42.1	1.96405	-42.2	1.85156	-42.2	2.17657	-42.1	2.31018	-42.1	2.2453	-42.1	2.28125
-42	1.38123	-42	1.84064	-42	1.96094	-42.1	1.85938	-42.1	2.16876	-42	2.31329	-42	2.2453	-42	2.27112
-41.9	1.37421	-41.9	1.84766	-41.9	1.95154	-42	1.87421	-42	2.16016	-41.9	2.31329	-41.9	2.23358	-41.9	2.2547
-41.8	1.36719	-41.8	1.83984	-41.8	1.92969	-41.9	1.88361	-41.9	2.15546	-41.8	2.31329	-41.8	2.21875	-41.8	2.25159
-41.7	1.39374	-41.7	1.83594	-41.7	1.91718	-41.8	1.87579	-41.8	2.15314	-41.7	2.32501	-41.7	2.21405	-41.7	2.24219
-41.6	1.39374	-41.6	1.83282	-41.6	1.89764	-41.7	1.87891	-41.7	2.14844	-41.6	2.32111	-41.6	2.22186	-41.6	2.23206
-41.5	1.39532	-41.5	1.83984	-41.5	1.88123	-41.6	1.89063	-41.6	2.14063	-41.5	2.31799	-41.5	2.21716	-41.5	2.24609
-41.4	1.39294	-41.4	1.84766	-41.4	1.87891	-41.5	1.89374	-41.5	2.12579	-41.4	2.30859	-41.4	2.22656	-41.4	2.2594
-41.3	1.38593	-41.3	1.85547	-41.3	1.87421	-41.4	1.88361	-41.4	2.11639	-41.3	2.32269	-41.3	2.23047	-41.3	2.25159
-41.2	1.39453	-41.2	1.875	-41.2	1.89374	-41.3	1.90314	-41.3	2.10938	-41.2	2.32501	-41.2	2.21405	-41.2	2.2547
-41.1	1.41327	-41.1	1.87189	-41.1	1.91095	-41.2	1.92969	-41.2	2.12659	-41.1	2.34064	-41.1	2.22656	-41.1	2.26642
-41	1.41016	-41	1.89221	-41	1.93671	-41.1	1.92969	-41.1	2.15234	-41	2.35236	-41	2.22888	-41	2.28674
-40.9	1.40546	-40.9	1.92578	-40.9	1.92499	-41	1.92188	-41	2.14764	-40.9	2.36407	-40.9	2.22186	-40.9	2.31329
-40.8	1.40155	-40.8	1.9328	-40.8	1.92499	-40.9	1.90546	-40.9	2.14063	-40.8	2.34924	-40.8	2.21954	-40.8	2.31329
-40.7	1.42108	-40.7	1.95001	-40.7	1.90546	-40.8	1.89532	-40.8	2.13049	-40.7	2.33984	-40.7	2.23669	-40.7	2.31799
-40.6	1.4375	-40.6	1.96643	-40.6	1.91016	-40.7	1.88593	-40.7	2.14063	-40.6	2.31329	-40.6	2.23438	-40.6	2.32813
-40.5	1.45233	-40.5	1.99921	-40.5	1.92499	-40.6	1.86798	-40.6	2.14063	-40.5	2.28284	-40.5	2.24139	-40.5	2.38049
-40.4	1.45233	-40.4	2.07263	-40.4	1.96014	-40.5	1.83514	-40.5	2.14453	-40.4	2.22736	-40.4	2.23358	-40.4	2.43127
-40.3	1.44141	-40.3	2.13672	-40.3	2.00391	-40.4	1.80859	-40.4	2.18518	-40.3	2.20313	-40.3	2.19843	-40.3	2.51801
-40.2	1.40936	-40.2	2.10468	-40.2	2.09528	-40.3	1.79688	-40.3	2.22656	-40.2	2.16876	-40.2	2.12811	-40.2	2.60706
-40.1	1.36249	-40.1	1.87189	-40.1	2.08746	-40.2	1.80548	-40.2	2.2547	-40.1	2.11798	-40.1	2.08124	-40.1	2.45471
-40	1.28668	-40	1.52893	-40	1.88751	-40.1	1.80859	-40.1	2.22498	-40	2.08203	-40	2.00623	-40	2.11877
-39.9	1.15466	-39.9	1.29919	-39.9	1.6734	-40	1.80078	-40	2.14063	-39.9	2.04065	-39.9	1.93201	-39.9	1.85858
-39.8	1.00934	-39.8	1.19061	-39.8	1.42267	-39.9	1.78906	-39.9	1.97034	-39.8	2.01953	-39.8	1.8703	-39.8	1.68048
-39.7	0.889832	-39.7	1.19531	-39.7	1.2406	-39.8	1.78906	-39.8	1.77185	-39.7	1.99768	-39.7	1.81482	-39.7	1.68439
-39.6	0.842163	-39.6	1.23596	-39.6	1.15857	-39.7	1.78125	-39.7	1.65546	-39.6	2	-39.6	1.74921	-39.6	1.75629
-39.5	0.84375	-39.5	1.32501	-39.5	1.19293	-39.6	1.77423	-39.6	1.58203	-39.5	1.98517	-39.5	1.69373	-39.5	1.85315
-39.4	0.910156	-39.4	1.39532	-39.4	1.33203	-39.5	1.76953	-39.5	1.59845	-39.4	1.95081	-39.4	1.64063	-39.4	1.91095
-39.3	0.984375	-39.3	1.43518	-39.3	1.42188	-39.4	1.77734	-39.4	1.66095	-39.3	1.91876	-39.3	1.60779	-39.3	1.9516
-39.2	1.03986	-39.2	1.47186	-39.2	1.50391	-39.3	1.78595	-39.3	1.71954	-39.2	1.90625	-39.2	1.60077	-39.2	2.00079
-39.1	1.09766	-39.1	1.50079	-39.1	1.57892	-39.2	1.77655	-39.2	1.7547	-39.1	1.91565	-39.1	1.6297	-39.1	2.02893
-39	1.13983	-39	1.50079	-39	1.64374	-39.1	1.76172	-39.1	1.79297	-39	1.92737	-39	1.66327	-39	2.03595
-38.9	1.20001	-38.9	1.51563	-38.9	1.66718	-39	1.74689	-39	1.84766	-38.9	1.9375	-38.9	1.6875	-38.9	2.03595
-38.8	1.25311	-38.8	1.52734	-38.8	1.6828	-38.9	1.74139	-38.9	1.86877	-38.8	1.93518	-38.8	1.70233	-38.8	2.02423
-38.7	1.27734	-38.7	1.53204	-38.7	1.70233	-38.8	1.7547	-38.8	1.88281	-38.7	1.93439	-38.7	1.72968	-38.7	2.01251
-38.6	1.30389	-38.6	1.54688	-38.6	1.73126	-38.7	1.73828	-38.7	1.88361	-38.6	1.93048	-38.6	1.73358	-38.6	2.01721
-38.5	1.30389	-38.5	1.56329	-38.5	1.76953	-38.6	1.73828	-38.6	1.89063	-38.5	1.93518	-38.5	1.72968	-38.5	2.03204
-38.4	1.30078	-38.4	1.57031	-38.4	1.81171	-38.5	1.73517	-38.5	1.88593	-38.4	1.9422	-38.4	1.74609	-38.4	2.04846
-38.3	1.29138	-38.3	1.57813	-38.3	1.83514	-38.4	1.72577	-38.4	1.87579	-38.3	1.9469	-38.3	1.76563	-38.3	2.06641
-38.2	1.26953	-38.2	1.60236	-38.2	1.85938	-38.3	1.72345	-38.3	1.87421	-38.2	1.95392	-38.2	1.77734	-38.2	2.06799
-38.1	1.26013	-38.1	1.61719	-38.1	1.86639	-38.2	1.73047	-38.2	1.88049	-38.1	1.95862	-38.1	1.80389	-38.1	2.06329
-38	1.25311	-38	1.61719	-38	1.87421	-38.1	1.71875	-38.1	1.89374	-38	1.98126	-38	1.83124	-38	2.0719
-37.9	1.25	-37.9	1.62579	-37.9	1.86951	-38	1.72345	-38	1.89844	-37.9	1.99768	-37.9	1.85468	-37.9	2.0625
-37.8	1.2453	-37.8	1.61719	-37.8	1.87579	-37.9	1.71875	-37.9	1.90704	-37.8	2.01251	-37.8	1.86249	-37.8	2.06329
-37.7	1.24219	-37.7	1.63672	-37.7	1.85858	-37.8	1.71875	-37.8	1.90314	-37.7	2.01251	-37.7	1.86249	-37.7	2.06018
-37.6	1.23749	-37.6	1.64844	-37.6	1.84998	-37.7	1.70392	-37.7	1.91718	-37.6	2.01251	-37.6	1.875	-37.6	2.06329
-37.5	1.2453	-37.5	1.64844	-37.5	1.83514	-37.6	1.69922	-37.6	1.90704	-37.5	2.02423	-37.5	1.88202	-37.5	2.06018
-37.4	1.22577	-37.4	1.65314	-37.4	1.83203	-37.5	1.69141	-37.5	1.90234	-37.4	2.03204	-37.4	1.89063	-37.4	2.0672
-37.3	1.22577	-37.3	1.64374	-37.3	1.83514	-37.4	1.67969	-37.4	1.89063	-37.3	2.03674	-37.3	1.87732	-37.3	2.05859
-37.2	1.22266	-37.2	1.64142	-37.2	1.84686	-37.3	1.67499	-37.3	1.89063	-37.2	2.05157	-37.2	1.90314	-37.2	2.06329
-37.1	1.20624	-37.1	1.65314	-37.1	1.84686	-37.2	1.65314	-37.2	1.89063	-37.1	2.06329	-37.1	1.90857	-37.1	2.06018
-37	1.20624	-37	1.66327	-37	1.83514	-37.1	1.63361	-37.1	1.89844	-37	2.06018	-37	1.90625	-37	2.07501
-36.9	1.20935	-36.9	1.66797	-36.9	1.83514	-37	1.62421	-37	1.88751	-36.9	2.05859	-36.9	1.91638	-36.9	2.07501
-36.8	1.19922	-36.8	1.67578	-36.8	1.83203	-36.9	1.61407	-36.9	1.87811	-36.8	2.05157	-36.8	1.9375	-36.8	2.0719
-36.7	1.19452	-36.7	1.67267	-36.7	1.81561	-36.8	1.60468	-36.8	1.85626	-36.7	2.04846	-36.7	1.94061	-36.7	2.0672
-36.6	1.19141	-36.6	1.66797	-36.6	1.81091	-36.7	1.59454	-36.7	1.85468	-36.6	2.04065	-36.6	1.9375	-36.6	2.04767
-36.5	1.18671	-36.5	1.67267	-36.5	1.8078	-36.6	1.59296	-36.6	1.84924	-36.5	2.03906	-36.5	1.9328	-36.5	2.03906
-36.4	1.19452	-36.4	1.66797	-36.4	1.78125	-36.5	1.57813	-36.5	1.84686	-36.4	2.04376	-36.4	1.9328	-36.4	2.02893
-36.3	1.18982	-36.3	1.67499	-36.3	1.76013	-36.4	1.56329	-36.4	1.83673	-36.3	2.04065	-36.3	1.94141	-36.3	2.03125
-36.2	1.17267	-36.2	1.68439	-36.2	1.75	-36.3	1.5672	-36.3	1.82733	-36.2	2.02734	-36.2	1.9281	-36.2	2.01642
-36.1	1.18982	-36.1	1.6875	-36.1	1.74921	-36.2	1.55078	-36.2	1.82501	-36.1	2.01721	-36.1	1.90546	-36.1	1.98987
-36	1.19141	-36	1.6875	-36	1.72577	-36.1	1.53906	-36.1	1.8078	-36	2.01953	-36	1.89063	-36	1.99298
-35.9	1.18671	-35.9	1.6922	-35.9	1.72266	-36	1.55078	-36	1.79376	-35.9	2.01721	-35.9	1.86951	-35.9	1.98206
-35.8	1.18671	-35.8	1.69061	-35.8	1.72107	-35.9	1.55078	-35.9	1.78125	-35.8	2.0094	-35.8	1.84766	-35.8	1.96875
-35.7	1.1828	-35.7	1.6922	-35.7	1.70624	-35.8	1.52734	-35.8	1.78595	-35.7	2	-35.7	1.83044	-35.7	1.95862
-35.6	1.1828	-35.6	1.69611	-35.6	1.69452	-35.7	1.53906	-35.7	1.77344	-35.6	2.00079	-35.6	1.82111	-35.6	1.94922
-35.5	1.17969	-35.5	1.69452	-35.5	1.69452	-35.6	1.55157	-35.6	1.76483	-35.5	1.99768	-35.5	1.81873	-35.5	1.95081
-35.4	1.17029	-35.4	1.6922	-35.4	1.69141	-35.5	1.57813	-35.5	1.7547	-35.4	1.99298	-35.4	1.80859	-35.4	1.92969
-35.3	1.17499	-35.3	1.70233	-35.3	1.67029	-35.4	1.58514	-35.4	1.7453	-35.3	1.98987	-35.3	1.79608	-35.3	1.92737
-35.2	1.17969	-35.2	1.70392	-35.2	1.67188	-35.3	1.58282	-35.3	1.73517	-35.2	1.97345	-35.2	1.78436	-35.2	1.93439
-35.1	1.17499	-35.1	1.70233	-35.1	1.65076	-35.2	1.57813	-35.2	1.73828	-35.1	1.96875	-35.1	1.77264	-35.1	1.93127
-35	1.16718	-35	1.69922	-35	1.64063	-35.1	1.59454	-35.1	1.73517	-35	1.95392	-35	1.76794	-35	1.92188
-34.9	1.15546	-34.9	1.6922	-34.9	1.62421	-35	1.59766	-35	1.73047	-34.9	1.95081	-34.9	1.76251	-34.9	1.91486
-34.8	1.14374	-34.8	1.68439	-34.8	1.62109	-34.9	1.60468	-34.9	1.72577	-34.8	1.92969	-34.8	1.74841	-34.8	1.89532
-34.7	1.15314	-34.7	1.68671	-34.7	1.60468	-34.8	1.59454	-34.8	1.73047	-34.7	1.92737	-34.7	1.74139	-34.7	1.88049
-34.6	1.15076	-34.6	1.66797	-34.6	1.59686	-34.7	1.60938	-34.7	1.71564	-34.6	1.91486	-34.6	1.75781	-34.6	1.87109
-34.5	1.14374	-34.5	1.66486	-34.5	1.59216	-34.6	1.60938	-34.6	1.71094	-34.5	1.89844	-34.5	1.73749	-34.5	1.86096
-34.4	1.14063	-34.4	1.65234	-34.4	1.58203	-34.5	1.61407	-34.5	1.71094	-34.4	1.88831	-34.4	1.72888	-34.4	1.84454
-34.3	1.13123	-34.3	1.64844	-34.3	1.58203	-34.4	1.62421	-34.4	1.71564	-34.3	1.88049	-34.3	1.72656	-34.3	1.84143
-34.2	1.12109	-34.2	1.64374	-34.2	1.57263	-34.3	1.62579	-34.3	1.69141	-34.2	1.87891	-34.2	1.72888	-34.2	1.83673
-34.1	1.12109	-34.1	1.63831	-34.1	1.56561	-34.2	1.61719	-34.2	1.69922	-34.1	1.86877	-34.1	1.72345	-34.1	1.8125
-34	1.11639	-34	1.63593	-34	1.56561	-34.1	1.62891	-34.1	1.68359	-34	1.85938	-34	1.72888	-34	1.79846
-33.9	1.11951	-33.9	1.63361	-33.9	1.5625	-34	1.63361	-34	1.67969	-33.9	1.84454	-33.9	1.71405	-33.9	1.78906
-33.8	1.11719	-33.8	1.62421	-33.8	1.54608	-33.9	1.63593	-33.9	1.67657	-33.8	1.81799	-33.8	1.71094	-33.8	1.77893
-33.7	1.12421	-33.7	1.62109	-33.7	1.54297	-33.8	1.62891	-33.8	1.67188	-33.7	1.82031	-33.7	1.70935	-33.7	1.76172
-33.6	1.12109	-33.6	1.60236	-33.6	1.52655	-33.7	1.63672	-33.7	1.67188	-33.6	1.80548	-33.6	1.69922	-33.6	1.74768
-33.5	1.11169	-33.5	1.59296	-33.5	1.52185	-33.6	1.63831	-33.6	1.65546	-33.5	1.78674	-33.5	1.68982	-33.5	1.73517
-33.4	1.10468	-33.4	1.58282	-33.4	1.51953	-33.5	1.63593	-33.5	1.64532	-33.4	1.76642	-33.4	1.6875	-33.4	1.72034
-33.3	1.10938	-33.3	1.57031	-33.3	1.51483	-33.4	1.63361	-33.4	1.64063	-33.3	1.7547	-33.3	1.67969	-33.3	1.71094
-33.2	1.10468	-33.2	1.55389	-33.2	1.51013	-33.3	1.63593	-33.3	1.63751	-33.2	1.73828	-33.2	1.68671	-33.2	1.70081
-33.1	1.11639	-33.1	1.55157	-33.1	1.5	-33.2	1.62891	-33.2	1.63593	-33.1	1.72815	-33.1	1.6781	-33.1	1.69141
-33	1.11249	-33	1.54376	-33	1.50311	-33.1	1.62189	-33.1	1.63751	-33	1.71564	-33	1.66797	-33	1.68127
-32.9	1.10938	-32.9	1.53436	-32.9	1.49219	-33	1.61719	-33	1.64063	-32.9	1.70392	-32.9	1.66718	-32.9	1.67188
-32.8	1.11169	-32.8	1.53595	-32.8	1.48749	-32.9	1.61407	-32.9	1.63593	-32.8	1.68439	-32.8	1.65076	-32.8	1.65784
-32.7	1.09296	-32.7	1.52264	-32.7	1.48749	-32.8	1.59686	-32.8	1.61407	-32.7	1.66956	-32.7	1.64844	-32.7	1.66486
-32.6	1.08984	-32.6	1.52423	-32.6	1.48047	-32.7	1.58282	-32.7	1.61798	-32.6	1.65314	-32.6	1.63904	-32.6	1.66174
-32.5	1.08203	-32.5	1.52734	-32.5	1.47107	-32.6	1.57343	-32.6	1.61328	-32.5	1.64844	-32.5	1.62891	-32.5	1.65234
-32.4	1.08044	-32.4	1.51953	-32.4	1.45624	-32.5	1.56329	-32.5	1.62109	-32.4	1.63831	-32.4	1.62421	-32.4	1.64532
-32.3	1.07343	-32.3	1.50311	-32.3	1.44922	-32.4	1.55078	-32.4	1.62109	-32.3	1.63049	-32.3	1.61249	-32.3	1.63831
-32.2	1.07343	-32.2	1.49298	-32.2	1.44452	-32.3	1.52734	-32.3	1.62109	-32.2	1.62891	-32.2	1.60468	-32.2	1.63361
-32.1	1.07813	-32.1	1.49609	-32.1	1.44452	-32.2	1.52423	-32.2	1.62109	-32.1	1.61877	-32.1	1.59296	-32.1	1.63361
-32	1.07343	-32	1.5047	-32	1.44141	-32.1	1.50311	-32.1	1.62579	-32	1.62109	-32	1.58984	-32	1.63361
-31.9	1.07031	-31.9	1.4953	-31.9	1.43671	-32	1.48047	-32	1.61639	-31.9	1.62189	-31.9	1.59296	-31.9	1.63049
-31.8	1.06561	-31.8	1.49609	-31.8	1.43201	-31.9	1.45392	-31.9	1.60626	-31.8	1.63049	-31.8	1.59296	-31.8	1.62109
-31.7	1.06091	-31.7	1.48828	-31.7	1.42188	-31.8	1.4328	-31.8	1.59686	-31.7	1.62891	-31.7	1.60938	-31.7	1.61407
-31.6	1.05389	-31.6	1.48517	-31.6	1.41248	-31.7	1.41797	-31.7	1.59454	-31.6	1.61877	-31.6	1.59998	-31.6	1.61096
-31.5	1.05548	-31.5	1.48828	-31.5	1.41016	-31.6	1.39532	-31.6	1.58673	-31.5	1.60626	-31.5	1.58514	-31.5	1.59454
-31.4	1.06561	-31.4	1.47345	-31.4	1.38904	-31.5	1.36249	-31.5	1.57733	-31.4	1.59143	-31.4	1.57031	-31.4	1.59143
-31.3	1.06561	-31.3	1.46875	-31.3	1.37891	-31.4	1.36407	-31.4	1.5625	-31.3	1.58984	-31.3	1.5578	-31.3	1.57031
-31.2	1.06561	-31.2	1.47577	-31.2	1.37421	-31.3	1.34766	-31.3	1.54767	-31.2	1.58282	-31.2	1.53436	-31.2	1.56018
-31.1	1.06091	-31.1	1.46173	-31.1	1.37109	-31.2	1.34454	-31.2	1.54608	-31.1	1.57971	-31.1	1.52264	-31.1	1.56329
-31	1.05548	-31	1.44141	-31	1.36169	-31.1	1.34296	-31.1	1.54767	-31	1.57813	-31	1.51483	-31	1.56329
-30.9	1.0578	-30.9	1.4375	-30.9	1.35468	-31	1.31641	-31	1.54608	-30.9	1.56018	-30.9	1.51013	-30.9	1.57501
-30.8	1.04919	-30.8	1.42657	-30.8	1.35156	-30.9	1.32971	-30.9	1.54688	-30.8	1.53906	-30.8	1.48828	-30.8	1.57501
-30.7	1.03125	-30.7	1.41327	-30.7	1.35468	-30.8	1.33514	-30.8	1.54376	-30.7	1.52893	-30.7	1.48828	-30.7	1.57971
-30.6	1.03436	-30.6	1.39844	-30.6	1.33984	-30.7	1.33984	-30.7	1.53595	-30.6	1.53204	-30.6	1.47107	-30.6	1.57031
-30.5	1.03436	-30.5	1.40625	-30.5	1.34216	-30.6	1.33282	-30.6	1.53827	-30.5	1.52893	-30.5	1.46875	-30.5	1.56018
-30.4	1.03436	-30.4	1.39844	-30.4	1.33514	-30.5	1.32813	-30.5	1.53906	-30.4	1.52423	-30.4	1.45935	-30.4	1.55548
-30.3	1.03125	-30.3	1.39612	-30.3	1.33514	-30.4	1.33514	-30.4	1.53595	-30.3	1.52423	-30.3	1.45233	-30.3	1.56329
-30.2	1.02185	-30.2	1.39374	-30.2	1.33984	-30.3	1.32501	-30.3	1.55078	-30.2	1.52893	-30.2	1.45703	-30.2	1.54846
-30.1	1.01953	-30.1	1.38361	-30.1	1.33203	-30.2	1.32031	-30.2	1.54297	-30.1	1.51953	-30.1	1.45233	-30.1	1.55078
-30	1.01013	-30	1.37109	-30	1.32263	-30.1	1.32031	-30.1	1.53125	-30	1.52423	-30	1.44922	-30	1.54376
-29.9	1	-29.9	1.35468	-29.9	1.31561	-30	1.30859	-30	1.53906	-29.9	1.52112	-29.9	1.43982	-29.9	1.55316
-29.8	0.992188	-29.8	1.34454	-29.8	1.32031	-29.9	1.32501	-29.9	1.53595	-29.8	1.52423	-29.8	1.42969	-29.8	1.55078
-29.7	0.9953	-29.7	1.33514	-29.7	1.31561	-29.8	1.31561	-29.8	1.53516	-29.7	1.52423	-29.7	1.42029	-29.7	1.54376
-29.6	0.990601	-29.6	1.31329	-29.6	1.31561	-29.7	1.32813	-29.7	1.54297	-29.6	1.52893	-29.6	1.41797	-29.6	1.54065
-29.5	0.980469	-29.5	1.30859	-29.5	1.31561	-29.6	1.34924	-29.6	1.53906	-29.5	1.51953	-29.5	1.40546	-29.5	1.53906
-29.4	0.975769	-29.4	1.30548	-29.4	1.31561	-29.5	1.35156	-29.5	1.54767	-29.4	1.53204	-29.4	1.40076	-29.4	1.52893
-29.3	0.975769	-29.3	1.29608	-29.3	1.32031	-29.4	1.35938	-29.4	1.55078	-29.3	1.54846	-29.3	1.39844	-29.3	1.52423
-29.2	0.980469	-29.2	1.28595	-29.2	1.31561	-29.3	1.36719	-29.3	1.55078	-29.2	1.56329	-29.2	1.39374	-29.2	1.52112
-29.1	0.975769	-29.1	1.27264	-29.1	1.31561	-29.2	1.37579	-29.2	1.55078	-29.1	1.57111	-29.1	1.39374	-29.1	1.51172
-29	0.971069	-29	1.2547	-29	1.31561	-29.1	1.39374	-29.1	1.55389	-29	1.57971	-29	1.39374	-29	1.51251
-28.9	0.96875	-28.9	1.25	-28.9	1.32031	-29	1.40314	-29	1.54376	-28.9	1.57501	-28.9	1.40155	-28.9	1.5094
-28.8	0.959351	-28.8	1.24298	-28.8	1.31091	-28.9	1.41016	-28.9	1.55078	-28.8	1.58282	-28.8	1.39844	-28.8	1.51642
-28.7	0.965637	-28.7	1.23047	-28.7	1.30078	-28.8	1.41797	-28.8	1.55548	-28.7	1.59143	-28.7	1.39374	-28.7	1.52423
-28.6	0.967957	-28.6	1.21405	-28.6	1.29138	-28.7	1.42969	-28.7	1.5625	-28.6	1.58673	-28.6	1.39374	-28.6	1.54376
-28.5	0.959351	-28.5	1.19141	-28.5	1.28125	-28.6	1.43439	-28.6	1.5625	-28.5	1.59454	-28.5	1.39844	-28.5	1.54065
-28.4	0.949219	-28.4	1.16797	-28.4	1.28125	-28.5	1.43671	-28.5	1.5625	-28.4	1.57501	-28.4	1.39374	-28.4	1.54376
-28.3	0.959351	-28.3	1.16797	-28.3	1.27185	-28.4	1.43439	-28.4	1.5625	-28.3	1.57501	-28.3	1.38202	-28.3	1.54376
-28.2	0.949219	-28.2	1.15625	-28.2	1.27264	-28.3	1.44922	-28.3	1.54608	-28.2	1.5672	-28.2	1.37421	-28.2	1.55237
-28.1	0.941406	-28.1	1.17267	-28.1	1.28436	-28.2	1.44922	-28.2	1.54065	-28.1	1.55548	-28.1	1.35938	-28.1	1.55078
-28	0.936707	-28	1.16797	-28	1.28436	-28.1	1.46564	-28.1	1.54608	-28	1.56018	-28	1.37421	-28	1.54065
-27.9	0.936707	-27.9	1.17578	-27.9	1.29376	-28	1.46875	-28	1.53906	-27.9	1.55548	-27.9	1.37421	-27.9	1.53595
-27.8	0.939819	-27.8	1.17737	-27.8	1.3078	-27.9	1.47577	-27.9	1.53595	-27.8	1.55859	-27.8	1.37421	-27.8	1.51953
-27.7	0.9328	-27.7	1.17969	-27.7	1.3078	-27.8	1.48126	-27.8	1.54608	-27.7	1.54846	-27.7	1.36951	-27.7	1.52112
-27.6	0.929688	-27.6	1.17969	-27.6	1.31091	-27.7	1.49689	-27.7	1.54376	-27.6	1.53906	-27.6	1.36719	-27.6	1.52423
-27.5	0.944519	-27.5	1.19061	-27.5	1.30548	-27.6	1.5	-27.6	1.55548	-27.5	1.53674	-27.5	1.37109	-27.5	1.53125
-27.4	0.944519	-27.4	1.1969	-27.4	1.3031	-27.5	1.50702	-27.5	1.55078	-27.4	1.54376	-27.4	1.37421	-27.4	1.51721
-27.3	0.949219	-27.3	1.21094	-27.3	1.30389	-27.4	1.5047	-27.4	1.55078	-27.3	1.54065	-27.3	1.38123	-27.3	1.52112
-27.2	0.944519	-27.2	1.21094	-27.2	1.30078	-27.3	1.50311	-27.3	1.55078	-27.2	1.55548	-27.2	1.3703	-27.2	1.51953
-27.1	0.939819	-27.1	1.20703	-27.1	1.29138	-27.2	1.5047	-27.2	1.54767	-27.1	1.55078	-27.1	1.37891	-27.1	1.51251
-27	0.941406	-27	1.22186	-27	1.28436	-27.1	1.50781	-27.1	1.55078	-27	1.54846	-27	1.38202	-27	1.5094
-26.9	0.9375	-26.9	1.21173	-26.9	1.28906	-27	1.51172	-27	1.54608	-26.9	1.55548	-26.9	1.39374	-26.9	1.51642
-26.8	0.944519	-26.8	1.21875	-26.8	1.28125	-26.9	1.5	-26.9	1.54767	-26.8	1.56018	-26.8	1.39063	-26.8	1.50781
-26.7	0.939819	-26.7	1.21564	-26.7	1.27185	-26.8	1.49689	-26.8	1.54608	-26.7	1.55859	-26.7	1.39764	-26.7	1.5094
-26.6	0.941406	-26.6	1.21094	-26.6	1.28125	-26.7	1.4953	-26.7	1.53595	-26.6	1.56018	-26.6	1.38904	-26.6	1.5094
-26.5	0.944519	-26.5	1.20703	-26.5	1.27966	-26.6	1.48828	-26.6	1.52344	-26.5	1.55078	-26.5	1.38672	-26.5	1.5
-26.4	0.941406	-26.4	1.20703	-26.4	1.28125	-26.5	1.48517	-26.5	1.51953	-26.4	1.54846	-26.4	1.38904	-26.4	1.51251
-26.3	0.939819	-26.3	1.21875	-26.3	1.27655	-26.4	1.4953	-26.4	1.52814	-26.3	1.54376	-26.3	1.37421	-26.3	1.51251
-26.2	0.9328	-26.2	1.22345	-26.2	1.27185	-26.3	1.49298	-26.3	1.51874	-26.2	1.55859	-26.2	1.36719	-26.2	1.5094
-26.1	0.929688	-26.1	1.23828	-26.1	1.27423	-26.2	1.49219	-26.2	1.5	-26.1	1.54846	-26.1	1.37891	-26.1	1.5047
-26	0.924988	-26	1.24609	-26	1.27185	-26.1	1.48358	-26.1	1.48517	-26	1.54846	-26	1.38123	-26	1.50159
-25.9	0.9375	-25.9	1.24609	-25.9	1.26483	-26	1.48517	-26	1.48047	-25.9	1.53906	-25.9	1.37891	-25.9	1.5
-25.8	0.939819	-25.8	1.26251	-25.8	1.26953	-25.9	1.48358	-25.9	1.48749	-25.8	1.53595	-25.8	1.36639	-25.8	1.48517
-25.7	0.941406	-25.7	1.27734	-25.7	1.26874	-25.8	1.48517	-25.8	1.46564	-25.7	1.52423	-25.7	1.35779	-25.7	1.49298
-25.6	0.936707	-25.6	1.27734	-25.6	1.26483	-25.7	1.47345	-25.7	1.45313	-25.6	1.52423	-25.6	1.35938	-25.6	1.49689
-25.5	0.944519	-25.5	1.29376	-25.5	1.27344	-25.6	1.47577	-25.6	1.44922	-25.5	1.51251	-25.5	1.36951	-25.5	1.48987
-25.4	0.941406	-25.4	1.28906	-25.4	1.27185	-25.5	1.47345	-25.5	1.45782	-25.4	1.5094	-25.4	1.35938	-25.4	1.48047
-25.3	0.956238	-25.3	1.29218	-25.3	1.26172	-25.4	1.47577	-25.4	1.44843	-25.3	1.5047	-25.3	1.35779	-25.3	1.47815
-25.2	0.956238	-25.2	1.28204	-25.2	1.26013	-25.3	1.47345	-25.3	1.45313	-25.2	1.48828	-25.2	1.35938	-25.2	1.48047
-25.1	0.956238	-25.1	1.29688	-25.1	1.26172	-25.2	1.46094	-25.2	1.43439	-25.1	1.48987	-25.1	1.35938	-25.1	1.45862
-25	0.956238	-25	1.30078	-25	1.26483	-25.1	1.45624	-25.1	1.42499	-25	1.48987	-25	1.36951	-25	1.46252
-24.9	0.960938	-24.9	1.29376	-24.9	1.27185	-25	1.45392	-25	1.42657	-24.9	1.48047	-24.9	1.35938	-24.9	1.44922
-24.8	0.956238	-24.8	1.29608	-24.8	1.26953	-24.9	1.44922	-24.9	1.42499	-24.8	1.47815	-24.8	1.36639	-24.8	1.45081
-24.7	0.959351	-24.7	1.29376	-24.7	1.26172	-24.8	1.44611	-24.8	1.43439	-24.7	1.46875	-24.7	1.36249	-24.7	1.44141
-24.6	0.941406	-24.6	1.29608	-24.6	1.26013	-24.7	1.44452	-24.7	1.42657	-24.6	1.45862	-24.6	1.35779	-24.6	1.43909
-24.5	0.944519	-24.5	1.28204	-24.5	1.26172	-24.6	1.44611	-24.6	1.41718	-24.5	1.46094	-24.5	1.35938	-24.5	1.42969
-24.4	0.939819	-24.4	1.28906	-24.4	1.25232	-24.5	1.44452	-24.5	1.41486	-24.4	1.45862	-24.4	1.35938	-24.4	1.40784
-24.3	0.929688	-24.3	1.28906	-24.3	1.25	-24.4	1.43439	-24.4	1.40546	-24.3	1.45392	-24.3	1.36169	-24.3	1.39532
-24.2	0.9328	-24.2	1.28595	-24.2	1.2406	-24.3	1.44141	-24.3	1.41016	-24.2	1.45862	-24.2	1.36249	-24.2	1.37891
-24.1	0.9328	-24.1	1.28436	-24.1	1.24219	-24.2	1.4328	-24.2	1.40704	-24.1	1.46094	-24.1	1.35468	-24.1	1.36877
-24	0.941406	-24	1.27423	-24	1.22888	-24.1	1.42267	-24.1	1.40546	-24	1.45081	-24	1.33984	-24	1.36096
-23.9	0.932007	-23.9	1.27264	-23.9	1.23047	-24	1.42499	-24	1.39532	-23.9	1.44922	-23.9	1.34998	-23.9	1.33984
-23.8	0.921875	-23.8	1.27423	-23.8	1.22266	-23.9	1.41797	-23.9	1.39844	-23.8	1.43909	-23.8	1.33984	-23.8	1.32501
-23.7	0.900757	-23.7	1.26953	-23.7	1.23279	-23.8	1.41486	-23.8	1.40234	-23.7	1.4422	-23.7	1.33044	-23.7	1.29846
-23.6	0.898438	-23.6	1.26172	-23.6	1.22577	-23.7	1.41016	-23.7	1.38281	-23.6	1.43909	-23.6	1.32813	-23.6	1.28906
-23.5	0.893738	-23.5	1.25311	-23.5	1.22266	-23.6	1.40704	-23.6	1.38751	-23.5	1.44141	-23.5	1.32343	-23.5	1.27893
-23.4	0.902344	-23.4	1.2547	-23.4	1.22107	-23.5	1.40546	-23.5	1.38593	-23.4	1.43909	-23.4	1.32343	-23.4	1.27423
-23.3	0.900757	-23.3	1.25	-23.3	1.22266	-23.4	1.41016	-23.4	1.38751	-23.3	1.42969	-23.3	1.31171	-23.3	1.27112
-23.2	0.890625	-23.2	1.2453	-23.2	1.21796	-23.3	1.39532	-23.3	1.375	-23.2	1.41956	-23.2	1.32031	-23.2	1.26172
-23.1	0.885925	-23.1	1.2547	-23.1	1.20935	-23.2	1.40546	-23.2	1.36639	-23.1	1.41797	-23.1	1.31561	-23.1	1.25159
-23	0.881226	-23	1.25	-23	1.21094	-23.1	1.39844	-23.1	1.35626	-23	1.40784	-23	1.31091	-23	1.25
-22.9	0.875793	-22.9	1.23517	-22.9	1.20624	-23	1.38361	-23	1.35468	-22.9	1.39063	-22.9	1.30859	-22.9	1.23987
-22.8	0.878113	-22.8	1.2453	-22.8	1.20313	-22.9	1.38593	-22.9	1.34454	-22.8	1.37659	-22.8	1.30389	-22.8	1.22736
-22.7	0.866394	-22.7	1.24298	-22.7	1.21326	-22.8	1.38361	-22.8	1.34845	-22.7	1.38049	-22.7	1.29608	-22.7	1.21875
-22.6	0.858582	-22.6	1.24219	-22.6	1.21094	-22.7	1.37421	-22.7	1.34686	-22.6	1.37891	-22.6	1.26953	-22.6	1.20862
-22.5	0.842163	-22.5	1.25	-22.5	1.21326	-22.6	1.37189	-22.6	1.33673	-22.5	1.36877	-22.5	1.26013	-22.5	1.19922
-22.4	0.839844	-22.4	1.25311	-22.4	1.20624	-22.5	1.37579	-22.5	1.32733	-22.4	1.36407	-22.4	1.26953	-22.4	1.20081
-22.3	0.835144	-22.3	1.25	-22.3	1.19922	-22.4	1.37421	-22.4	1.3125	-22.3	1.36719	-22.3	1.26013	-22.3	1.18909
-22.2	0.830444	-22.2	1.24298	-22.2	1.20154	-22.3	1.35938	-22.3	1.30548	-22.2	1.36877	-22.2	1.25	-22.2	1.17969
-22.1	0.828125	-22.1	1.24689	-22.1	1.19922	-22.2	1.34454	-22.2	1.29608	-22.1	1.36096	-22.1	1.24841	-22.1	1.17267
-22	0.832031	-22	1.2453	-22	1.20624	-22.1	1.33514	-22.1	1.28906	-22	1.35938	-22	1.23828	-22	1.18127
-21.9	0.822632	-21.9	1.25	-21.9	1.18982	-22	1.32501	-22	1.28595	-21.9	1.35626	-21.9	1.23047	-21.9	1.18439
-21.8	0.8125	-21.8	1.23517	-21.8	1.19922	-21.9	1.32031	-21.9	1.28436	-21.8	1.34924	-21.8	1.22107	-21.8	1.17969
-21.7	0.799194	-21.7	1.23358	-21.7	1.19843	-21.8	1.30859	-21.8	1.27423	-21.7	1.33984	-21.7	1.21405	-21.7	1.18207
-21.6	0.789063	-21.6	1.23517	-21.6	1.17889	-21.7	1.3125	-21.7	1.26172	-21.6	1.32501	-21.6	1.20624	-21.6	1.18439
-21.5	0.77655	-21.5	1.23047	-21.5	1.17499	-21.6	1.30548	-21.6	1.26953	-21.5	1.31018	-21.5	1.1875	-21.5	1.19141
-21.4	0.760132	-21.4	1.22577	-21.4	1.17499	-21.5	1.29608	-21.5	1.26642	-21.4	1.32031	-21.4	1.1781	-21.4	1.18909
-21.3	0.75	-21.3	1.22345	-21.3	1.15546	-21.4	1.28906	-21.4	1.26172	-21.3	1.31799	-21.3	1.16797	-21.3	1.19922
-21.2	0.740601	-21.2	1.22186	-21.2	1.15234	-21.3	1.27423	-21.3	1.25702	-21.2	1.30859	-21.2	1.15857	-21.2	1.20081
-21.1	0.730469	-21.1	1.22345	-21.1	1.15076	-21.2	1.27655	-21.2	1.24689	-21.1	1.29846	-21.1	1.14844	-21.1	1.20081
-21	0.730469	-21	1.21564	-21	1.14063	-21.1	1.27423	-21.1	1.24219	-21	1.29376	-21	1.14063	-21	1.19141
-20.9	0.721069	-20.9	1.21405	-20.9	1.14294	-21	1.26483	-21	1.22577	-20.9	1.29065	-20.9	1.13123	-20.9	1.20081
-20.8	0.730469	-20.8	1.21094	-20.8	1.13593	-20.9	1.2547	-20.9	1.21564	-20.8	1.28595	-20.8	1.12109	-20.8	1.19922
-20.7	0.729675	-20.7	1.20392	-20.7	1.12891	-20.8	1.24219	-20.8	1.22266	-20.7	1.28125	-20.7	1.10779	-20.7	1.20081
-20.6	0.721069	-20.6	1.19452	-20.6	1.12811	-20.7	1.23358	-20.7	1.20624	-20.6	1.27893	-20.6	1.09766	-20.6	1.19611
-20.5	0.730469	-20.5	1.19922	-20.5	1.11951	-20.6	1.23517	-20.6	1.21094	-20.5	1.26953	-20.5	1.09998	-20.5	1.19922
-20.4	0.728882	-20.4	1.1922	-20.4	1.12891	-20.5	1.21875	-20.5	1.19611	-20.4	1.26721	-20.4	1.07813	-20.4	1.19611
-20.3	0.71875	-20.3	1.17969	-20.3	1.11639	-20.4	1.21094	-20.4	1.19611	-20.3	1.26953	-20.3	1.06561	-20.3	1.18909
-20.2	0.722656	-20.2	1.17969	-20.2	1.11328	-20.3	1.20703	-20.3	1.19843	-20.2	1.26721	-20.2	1.05701	-20.2	1.18829
-20.1	0.717957	-20.1	1.17969	-20.1	1.11169	-20.2	1.21094	-20.2	1.19611	-20.1	1.26642	-20.1	1.05859	-20.1	1.17657
-20	0.721069	-20	1.17969	-20	1.10468	-20.1	1.19611	-20.1	1.18359	-20	1.25781	-20	1.05078	-20	1.18439
-19.9	0.725769	-19.9	1.17969	-19.9	1.08984	-20	1.19452	-20	1.17188	-19.9	1.2594	-19.9	1.04138	-19.9	1.18439
-19.8	0.725769	-19.8	1.17188	-19.8	1.09216	-19.9	1.18439	-19.9	1.16718	-19.8	1.2547	-19.8	1.03906	-19.8	1.18127
-19.7	0.71405	-19.7	1.16327	-19.7	1.08203	-19.8	1.17499	-19.8	1.16016	-19.7	1.23987	-19.7	1.02966	-19.7	1.17969
-19.6	0.710938	-19.6	1.16016	-19.6	1.07733	-19.7	1.16486	-19.7	1.14532	-19.6	1.23828	-19.6	1.01953	-19.6	1.18127
-19.5	0.701538	-19.5	1.15314	-19.5	1.06091	-19.6	1.16327	-19.6	1.15234	-19.5	1.22345	-19.5	1.01483	-19.5	1.17969
-19.4	0.699219	-19.4	1.16486	-19.4	1.05078	-19.5	1.15314	-19.5	1.13593	-19.4	1.21564	-19.4	1.00702	-19.4	1.18127
-19.3	0.709351	-19.3	1.15546	-19.3	1.03827	-19.4	1.14532	-19.4	1.14532	-19.3	1.20862	-19.3	1	-19.3	1.17657
-19.2	0.710938	-19.2	1.15314	-19.2	1.03125	-19.3	1.13593	-19.3	1.14063	-19.2	1.20782	-19.2	1.01013	-19.2	1.17188
-19.1	0.710938	-19.1	1.14374	-19.1	1.02185	-19.2	1.13361	-19.2	1.13751	-19.1	1.20782	-19.1	1	-19.1	1.16956
-19	0.713257	-19	1.13361	-19	1.01172	-19.1	1.13593	-19.1	1.14764	-19	1.19922	-19	0.990601	-19	1.16797
-18.9	0.706238	-18.9	1.13202	-18.9	1.00232	-19	1.12891	-19	1.14063	-18.9	1.20081	-18.9	0.988281	-18.9	1.15784
-18.8	0.699219	-18.8	1.12659	-18.8	0.9953	-18.9	1.12579	-18.9	1.13751	-18.8	1.19611	-18.8	0.978882	-18.8	1.16486
-18.7	0.709351	-18.7	1.12421	-18.7	0.980469	-18.8	1.12109	-18.8	1.13593	-18.7	1.18439	-18.7	0.983582	-18.7	1.15002
-18.6	0.710938	-18.6	1.12109	-18.6	0.971069	-18.7	1.10468	-18.7	1.13281	-18.6	1.16797	-18.6	0.96875	-18.6	1.15234
-18.5	0.706238	-18.5	1.09454	-18.5	0.956238	-18.6	1.10236	-18.6	1.12579	-18.5	1.16956	-18.5	0.967163	-18.5	1.14532
-18.4	0.706238	-18.4	1.08984	-18.4	0.949219	-18.5	1.09454	-18.5	1.13281	-18.4	1.16486	-18.4	0.96875	-18.4	1.13049
-18.3	0.706238	-18.3	1.08514	-18.3	0.936707	-18.4	1.09686	-18.4	1.11639	-18.3	1.15002	-18.3	0.96405	-18.3	1.12579
-18.2	0.689819	-18.2	1.07501	-18.2	0.920288	-18.3	1.09454	-18.3	1.12109	-18.2	1.14844	-18.2	0.96405	-18.2	1.12109
-18.1	0.691406	-18.1	1.07031	-18.1	0.905457	-18.2	1.08514	-18.2	1.12579	-18.1	1.15002	-18.1	0.975769	-18.1	1.11877
-18	0.691406	-18	1.05389	-18	0.890625	-18.1	1.08984	-18.1	1.11639	-18	1.13751	-18	0.96405	-18	1.10626
-17.9	0.682007	-17.9	1.03906	-17.9	0.878113	-18	1.07501	-18	1.12109	-17.9	1.11798	-17.9	0.975769	-17.9	1.08984
-17.8	0.691406	-17.8	1.03204	-17.8	0.871094	-17.9	1.06561	-17.9	1.11407	-17.8	1.08984	-17.8	0.957031	-17.8	1.09454
-17.7	0.686707	-17.7	1.03125	-17.7	0.858582	-17.8	1.06329	-17.8	1.10156	-17.7	1.08282	-17.7	0.96405	-17.7	1.07971
-17.6	0.670288	-17.6	1.02264	-17.6	0.842163	-17.7	1.0625	-17.7	1.10156	-17.6	1.06799	-17.6	0.959351	-17.6	1.07501
-17.5	0.671875	-17.5	1.02423	-17.5	0.851563	-17.6	1.05389	-17.6	1.10156	-17.5	1.05548	-17.5	0.949219	-17.5	1.05548
-17.4	0.667175	-17.4	1.01172	-17.4	0.842163	-17.5	1.05078	-17.5	1.09454	-17.4	1.03595	-17.4	0.944519	-17.4	1.04767
-17.3	0.650757	-17.3	1	-17.3	0.835144	-17.4	1.04376	-17.4	1.09686	-17.3	1.01642	-17.3	0.939819	-17.3	1.03595
-17.2	0.660156	-17.2	0.985168	-17.2	0.832031	-17.3	1.04376	-17.3	1.08984	-17.2	1	-17.2	0.9328	-17.2	1.0047
-17.1	0.635925	-17.1	0.975769	-17.1	0.822632	-17.2	1.04297	-17.2	1.08673	-17.1	0.997681	-17.1	0.929688	-17.1	1.00159
-17	0.635925	-17	0.96875	-17	0.815613	-17.1	1.03125	-17.1	1.08514	-17	0.985168	-17	0.924988	-17	0.992188
-16.9	0.628113	-16.9	0.949219	-16.9	0.800781	-17	1.02655	-17	1.08673	-16.9	0.965637	-16.9	0.910156	-16.9	0.985168
-16.8	0.616394	-16.8	0.934387	-16.8	0.796082	-16.9	1.01172	-16.9	1.09375	-16.8	0.949219	-16.8	0.908569	-16.8	0.970337
-16.7	0.604675	-16.7	0.924988	-16.7	0.791382	-16.8	1.0047	-16.8	1.08514	-16.7	0.939087	-16.7	0.910156	-16.7	0.96875
-16.6	0.609375	-16.6	0.910156	-16.6	0.78125	-16.7	0.9953	-16.7	1.08673	-16.6	0.934387	-16.6	0.920288	-16.6	0.965637
-16.5	0.596863	-16.5	0.903137	-16.5	0.78125	-16.6	0.988281	-16.6	1.08203	-16.5	0.919556	-16.5	0.917969	-16.5	0.950806
-16.4	0.592163	-16.4	0.882813	-16.4	0.783569	-16.5	0.96875	-16.5	1.07031	-16.4	0.910156	-16.4	0.905457	-16.4	0.946106
-16.3	0.589844	-16.3	0.871094	-16.3	0.769531	-16.4	0.965637	-16.4	1.0625	-16.3	0.895325	-16.3	0.900757	-16.3	0.929688
-16.2	0.580444	-16.2	0.854675	-16.2	0.768738	-16.3	0.956238	-16.3	1.05548	-16.2	0.883606	-16.2	0.898438	-16.2	0.919556
-16.1	0.570313	-16.1	0.847656	-16.1	0.752319	-16.2	0.949219	-16.2	1.0578	-16.1	0.883606	-16.1	0.905457	-16.1	0.929688
-16	0.570313	-16	0.832825	-16	0.757019	-16.1	0.9422	-16.1	1.05078	-16	0.864075	-16	0.898438	-16	0.919556
-15.9	0.572632	-15.9	0.835144	-15.9	0.75	-16	0.929688	-16	1.04297	-15.9	0.849243	-15.9	0.900757	-15.9	0.919556
-15.8	0.5625	-15.8	0.821106	-15.8	0.737488	-15.9	0.9328	-15.9	1.03595	-15.8	0.844543	-15.8	0.893738	-15.8	0.921875
-15.7	0.560913	-15.7	0.825012	-15.7	0.737488	-15.8	0.929688	-15.8	1.02655	-15.7	0.828125	-15.7	0.878906	-15.7	0.919556
-15.6	0.550781	-15.6	0.8125	-15.6	0.737488	-15.7	0.922668	-15.7	1.03125	-15.6	0.817993	-15.6	0.878113	-15.6	0.914856
-15.5	0.538269	-15.5	0.808594	-15.5	0.733582	-15.6	0.910156	-15.6	1.01642	-15.5	0.8172	-15.5	0.857788	-15.5	0.910156
-15.4	0.529663	-15.4	0.820313	-15.4	0.742188	-15.5	0.895325	-15.5	1.01172	-15.4	0.793762	-15.4	0.859375	-15.4	0.907837
-15.3	0.519531	-15.3	0.820313	-15.3	0.740601	-15.4	0.885925	-15.4	0.9953	-15.3	0.777344	-15.3	0.854675	-15.3	0.910156
-15.2	0.510132	-15.2	0.820313	-15.2	0.742188	-15.3	0.875793	-15.3	0.996887	-15.2	0.767212	-15.2	0.849976	-15.2	0.895325
-15.1	0.507813	-15.1	0.8125	-15.1	0.737488	-15.2	0.871094	-15.2	0.980469	-15.1	0.7547	-15.1	0.842957	-15.1	0.888306
-15	0.4953	-15	0.803894	-15	0.732788	-15.1	0.854675	-15.1	0.977356	-15	0.742981	-15	0.828125	-15	0.880493
-14.9	0.4953	-14.9	0.789063	-14.9	0.730469	-15	0.839844	-15	0.967957	-14.9	0.747681	-14.9	0.827332	-14.9	0.871094
-14.8	0.5	-14.8	0.782043	-14.8	0.728882	-14.9	0.825012	-14.9	0.953125	-14.8	0.75	-14.8	0.815613	-14.8	0.860962
-14.7	0.502319	-14.7	0.78595	-14.7	0.730469	-14.8	0.820313	-14.8	0.938293	-14.7	0.747681	-14.7	0.803894	-14.7	0.856262
-14.6	0.5	-14.6	0.78125	-14.6	0.733582	-14.7	0.800781	-14.7	0.936707	-14.6	0.75	-14.6	0.796082	-14.6	0.839844
-14.5	0.487488	-14.5	0.77655	-14.5	0.737488	-14.6	0.784363	-14.6	0.921875	-14.5	0.759399	-14.5	0.787476	-14.5	0.841431
-14.4	0.478882	-14.4	0.769531	-14.4	0.730469	-14.5	0.774231	-14.5	0.914856	-14.4	0.762512	-14.4	0.789063	-14.4	0.828125
-14.3	0.480469	-14.3	0.769531	-14.3	0.729675	-14.4	0.761719	-14.4	0.914063	-14.3	0.778931	-14.3	0.784363	-14.3	0.829712
-14.2	0.475769	-14.2	0.7547	-14.2	0.721069	-14.3	0.742188	-14.3	0.905457	-14.2	0.78125	-14.2	0.764832	-14.2	0.821899
-14.1	0.472656	-14.1	0.753113	-14.1	0.730469	-14.2	0.735168	-14.2	0.907043	-14.1	0.790649	-14.1	0.761719	-14.1	0.820313
-14	0.471069	-14	0.75	-14	0.717957	-14.1	0.722656	-14.1	0.902344	-14	0.797668	-14	0.757019	-14	0.8172
-13.9	0.472656	-13.9	0.738281	-13.9	0.725769	-14	0.706238	-14	0.894531	-13.9	0.800781	-13.9	0.7453	-13.9	0.797668
-13.8	0.459351	-13.8	0.72345	-13.8	0.717957	-13.9	0.696106	-13.9	0.882813	-13.8	0.798462	-13.8	0.725769	-13.8	0.790649
-13.7	0.460938	-13.7	0.722656	-13.7	0.709351	-13.8	0.671875	-13.8	0.866394	-13.7	0.808594	-13.7	0.709351	-13.7	0.800781
-13.6	0.459351	-13.6	0.710938	-13.6	0.710938	-13.7	0.652344	-13.7	0.864075	-13.6	0.805481	-13.6	0.706238	-13.6	0.78595
-13.5	0.460938	-13.5	0.694519	-13.5	0.710938	-13.6	0.635925	-13.6	0.863281	-13.5	0.798462	-13.5	0.694519	-13.5	0.778931
-13.4	0.459351	-13.4	0.6922	-13.4	0.717957	-13.5	0.621094	-13.5	0.856262	-13.4	0.810181	-13.4	0.674988	-13.4	0.778137
-13.3	0.460938	-13.3	0.691406	-13.3	0.701538	-13.4	0.609375	-13.4	0.846863	-13.3	0.800781	-13.3	0.674988	-13.3	0.758606
-13.2	0.456238	-13.2	0.679688	-13.2	0.703125	-13.3	0.578125	-13.3	0.851563	-13.2	0.810181	-13.2	0.660156	-13.2	0.738281
-13.1	0.456238	-13.1	0.671875	-13.1	0.698425	-13.2	0.575012	-13.2	0.836731	-13.1	0.808594	-13.1	0.655457	-13.1	0.735168
-13	0.449219	-13	0.663269	-13	0.694519	-13.1	0.5625	-13.1	0.846863	-13	0.810181	-13	0.650757	-13	0.720337
-12.9	0.451538	-12.9	0.672668	-12.9	0.701538	-13	0.546082	-13	0.832031	-12.9	0.808594	-12.9	0.643738	-12.9	0.71875
-12.8	0.449219	-12.8	0.676575	-12.8	0.694519	-12.9	0.519531	-12.9	0.805481	-12.8	0.805481	-12.8	0.635925	-12.8	0.708618
-12.7	0.448425	-12.7	0.671875	-12.7	0.686707	-12.8	0.5047	-12.8	0.792969	-12.7	0.798462	-12.7	0.628906	-12.7	0.712524
-12.6	0.436707	-12.6	0.663269	-12.6	0.674988	-12.7	0.4953	-12.7	0.77655	-12.6	0.808594	-12.6	0.616394	-12.6	0.707825
-12.5	0.436707	-12.5	0.660156	-12.5	0.679688	-12.6	0.480469	-12.6	0.766418	-12.5	0.806274	-12.5	0.604675	-12.5	0.691406
-12.4	0.420288	-12.4	0.664856	-12.4	0.667175	-12.5	0.461731	-12.5	0.761719	-12.4	0.813293	-12.4	0.599976	-12.4	0.6922
-12.3	0.410156	-12.3	0.652344	-12.3	0.671875	-12.4	0.457031	-12.4	0.7453	-12.3	0.810181	-12.3	0.589844	-12.3	0.696106
-12.2	0.410156	-12.2	0.643738	-12.2	0.667175	-12.3	0.449219	-12.3	0.735168	-12.2	0.805481	-12.2	0.577332	-12.2	0.681274
-12.1	0.412476	-12.1	0.628906	-12.1	0.662476	-12.2	0.449219	-12.2	0.722656	-12.1	0.800781	-12.1	0.557007	-12.1	0.676575
-12	0.402344	-12	0.633606	-12	0.655457	-12.1	0.441406	-12.1	0.710938	-12	0.810181	-12	0.542175	-12	0.679688
-11.9	0.397644	-11.9	0.621094	-11.9	0.652344	-12	0.434387	-12	0.696106	-11.9	0.805481	-11.9	0.546875	-11.9	0.669556
-11.8	0.385925	-11.8	0.609375	-11.8	0.650757	-11.9	0.424988	-11.9	0.683594	-11.8	0.800781	-11.8	0.534363	-11.8	0.667969
-11.7	0.389038	-11.7	0.604675	-11.7	0.660156	-11.8	0.414856	-11.8	0.674988	-11.7	0.790649	-11.7	0.52655	-11.7	0.672668
-11.6	0.390625	-11.6	0.597656	-11.6	0.662476	-11.7	0.410156	-11.7	0.676575	-11.6	0.78595	-11.6	0.514832	-11.6	0.664856
-11.5	0.385925	-11.5	0.594543	-11.5	0.655457	-11.6	0.410156	-11.6	0.664063	-11.5	0.78125	-11.5	0.507813	-11.5	0.657837
-11.4	0.371094	-11.4	0.589844	-11.4	0.647644	-11.5	0.426575	-11.5	0.655457	-11.4	0.774231	-11.4	0.510132	-11.4	0.669556
-11.3	0.373413	-11.3	0.570313	-11.3	0.640625	-11.4	0.436707	-11.4	0.657043	-11.3	0.767212	-11.3	0.4953	-11.3	0.679688
-11.2	0.371094	-11.2	0.561707	-11.2	0.650757	-11.3	0.421875	-11.3	0.655457	-11.2	0.769531	-11.2	0.483582	-11.2	0.676575
-11.1	0.361694	-11.1	0.563293	-11.1	0.643738	-11.2	0.426575	-11.2	0.645325	-11.1	0.778931	-11.1	0.480469	-11.1	0.681274
-11	0.354675	-11	0.558594	-11	0.648438	-11.1	0.424988	-11.1	0.645325	-11	0.774231	-11	0.467957	-11	0.676575
-10.9	0.351563	-10.9	0.550781	-10.9	0.647644	-11	0.414856	-11	0.647644	-10.9	0.771118	-10.9	0.456238	-10.9	0.679688
-10.8	0.33905	-10.8	0.543762	-10.8	0.647644	-10.9	0.417969	-10.9	0.637512	-10.8	0.769531	-10.8	0.439819	-10.8	0.689087
-10.7	0.330444	-10.7	0.542969	-10.7	0.635925	-10.8	0.434387	-10.8	0.632813	-10.7	0.766418	-10.7	0.424988	-10.7	0.676575
-10.6	0.339844	-10.6	0.53125	-10.6	0.632813	-10.7	0.424988	-10.7	0.616394	-10.6	0.759399	-10.6	0.410156	-10.6	0.679688
-10.5	0.342163	-10.5	0.523438	-10.5	0.631226	-10.6	0.434387	-10.6	0.606262	-10.5	0.758606	-10.5	0.400757	-10.5	0.689087
-10.4	0.328125	-10.4	0.514832	-10.4	0.635925	-10.5	0.424988	-10.5	0.596863	-10.4	0.75	-10.4	0.393738	-10.4	0.684387
-10.3	0.327332	-10.3	0.5	-10.3	0.632813	-10.4	0.425781	-10.4	0.594543	-10.3	0.742981	-10.3	0.378906	-10.3	0.689087
-10.2	0.320313	-10.2	0.5	-10.2	0.631226	-10.3	0.429688	-10.3	0.582031	-10.2	0.72345	-10.2	0.374207	-10.2	0.691406
-10.1	0.322632	-10.1	0.485168	-10.1	0.640625	-10.2	0.425781	-10.2	0.570313	-10.1	0.720337	-10.1	0.362488	-10.1	0.696106
-10	0.315613	-10	0.492188	-10	0.639832	-10.1	0.439087	-10.1	0.570313	-10	0.707825	-10	0.371094	-10	0.684387
-9.9	0.300781	-9.9	0.488281	-9.9	0.631226	-10	0.449219	-10	0.5625	-9.9	0.684387	-9.9	0.369507	-9.9	0.676575
-9.8	0.299194	-9.8	0.480469	-9.8	0.628906	-9.9	0.444519	-9.9	0.550781	-9.8	0.664856	-9.8	0.354675	-9.8	0.676575
-9.7	0.300781	-9.7	0.472656	-9.7	0.628113	-9.8	0.453918	-9.8	0.550781	-9.7	0.657043	-9.7	0.359375	-9.7	0.669556
-9.6	0.315613	-9.6	0.46405	-9.6	0.628113	-9.7	0.456238	-9.7	0.53595	-9.6	0.645325	-9.6	0.346863	-9.6	0.676575
-9.5	0.318726	-9.5	0.453918	-9.5	0.619507	-9.6	0.453918	-9.6	0.52655	-9.5	0.625793	-9.5	0.335144	-9.5	0.664063
-9.4	0.320313	-9.4	0.449219	-9.4	0.616394	-9.5	0.457031	-9.5	0.53125	-9.4	0.606262	-9.4	0.330444	-9.4	0.650024
-9.3	0.320313	-9.3	0.453918	-9.3	0.604675	-9.4	0.465637	-9.4	0.524231	-9.3	0.597656	-9.3	0.328125	-9.3	0.649231
-9.2	0.322632	-9.2	0.456238	-9.2	0.604675	-9.3	0.475769	-9.3	0.52655	-9.2	0.594543	-9.2	0.330444	-9.2	0.637512
-9.1	0.3125	-9.1	0.449219	-9.1	0.596863	-9.2	0.47345	-9.2	0.524231	-9.1	0.579712	-9.1	0.323425	-9.1	0.640625
-9	0.310913	-9	0.446106	-9	0.601563	-9.1	0.475769	-9.1	0.53125	-9	0.5672	-9	0.308594	-9	0.633606
-8.9	0.308594	-8.9	0.441406	-8.9	0.596863	-9	0.47345	-9	0.542969	-8.9	0.555481	-8.9	0.320313	-8.9	0.625793
-8.8	0.296082	-8.8	0.4328	-8.8	0.585144	-8.9	0.475769	-8.9	0.53125	-8.8	0.53595	-8.8	0.315613	-8.8	0.625793
-8.7	0.288269	-8.7	0.434387	-8.7	0.577332	-8.8	0.47345	-8.8	0.53125	-8.7	0.524231	-8.7	0.310913	-8.7	0.614075
-8.6	0.291382	-8.6	0.421875	-8.6	0.577332	-8.7	0.480469	-8.7	0.53125	-8.6	0.516418	-8.6	0.303894	-8.6	0.610962
-8.5	0.289063	-8.5	0.413269	-8.5	0.565613	-8.6	0.477356	-8.6	0.511719	-8.5	0.5047	-8.5	0.296082	-8.5	0.609375
-8.4	0.300781	-8.4	0.414856	-8.4	0.5625	-8.5	0.472656	-8.5	0.511719	-8.4	0.488281	-8.4	0.289063	-8.4	0.614075
-8.3	0.303101	-8.3	0.410156	-8.3	0.572632	-8.4	0.475769	-8.4	0.5	-8.3	0.47345	-8.3	0.291382	-8.3	0.606262
-8.2	0.296082	-8.2	0.405457	-8.2	0.565613	-8.3	0.46875	-8.3	0.485168	-8.2	0.466431	-8.2	0.289063	-8.2	0.594543
-8.1	0.28125	-8.1	0.403137	-8.1	0.565613	-8.2	0.460938	-8.2	0.4953	-8.1	0.453918	-8.1	0.284363	-8.1	0.591431
-8	0.288269	-8	0.398438	-8	0.5578	-8.1	0.460938	-8.1	0.485168	-8	0.446106	-8	0.279663	-8	0.575012
-7.9	0.271851	-7.9	0.390625	-7.9	0.546082	-8	0.449219	-8	0.492188	-7.9	0.439087	-7.9	0.289063	-7.9	0.575012
-7.8	0.264832	-7.8	0.378906	-7.8	0.52655	-7.9	0.449219	-7.9	0.484375	-7.8	0.441406	-7.8	0.284363	-7.8	0.5672
-7.7	0.261719	-7.7	0.371094	-7.7	0.52655	-7.8	0.441406	-7.8	0.472656	-7.7	0.434387	-7.7	0.279663	-7.7	0.555481
-7.6	0.257019	-7.6	0.364075	-7.6	0.507019	-7.7	0.429688	-7.7	0.453125	-7.6	0.419556	-7.6	0.277344	-7.6	0.53595
-7.5	0.252319	-7.5	0.363281	-7.5	0.4953	-7.6	0.429688	-7.6	0.441406	-7.5	0.417969	-7.5	0.264832	-7.5	0.528137
-7.4	0.261719	-7.4	0.354675	-7.4	0.484375	-7.5	0.410156	-7.5	0.433594	-7.4	0.414856	-7.4	0.253113	-7.4	0.5047
-7.3	0.257019	-7.3	0.339844	-7.3	0.467957	-7.4	0.398438	-7.4	0.414063	-7.3	0.419556	-7.3	0.25	-7.3	0.496887
-7.2	0.248413	-7.2	0.332825	-7.2	0.460144	-7.3	0.398438	-7.3	0.402344	-7.2	0.407043	-7.2	0.2453	-7.2	0.477356
-7.1	0.25	-7.1	0.332031	-7.1	0.448425	-7.2	0.387512	-7.2	0.394531	-7.1	0.398438	-7.1	0.240601	-7.1	0.465637
-7	0.257019	-7	0.320313	-7	0.440613	-7.1	0.366394	-7.1	0.385925	-7	0.400024	-7	0.238281	-7	0.446106
-6.9	0.2453	-6.9	0.300781	-6.9	0.417175	-7	0.371094	-7	0.371094	-6.9	0.403137	-6.9	0.248413	-6.9	0.429688
-6.8	0.242188	-6.8	0.28125	-6.8	0.409363	-6.9	0.359375	-6.9	0.364075	-6.8	0.407043	-6.8	0.25	-6.8	0.439087
-6.7	0.237488	-6.7	0.272644	-6.7	0.389832	-6.8	0.356262	-6.8	0.363281	-6.7	0.400024	-6.7	0.248413	-6.7	0.426575
-6.6	0.229675	-6.6	0.257813	-6.6	0.3703	-6.7	0.354675	-6.7	0.34845	-6.6	0.410156	-6.6	0.238281	-6.6	0.419556
-6.5	0.221069	-6.5	0.25	-6.5	0.358582	-6.6	0.351563	-6.6	0.34375	-6.5	0.395325	-6.5	0.2453	-6.5	0.418762
-6.4	0.206238	-6.4	0.242981	-6.4	0.349976	-6.5	0.339844	-6.5	0.346863	-6.4	0.383606	-6.4	0.230469	-6.4	0.407043
-6.3	0.194519	-6.3	0.230469	-6.3	0.346863	-6.4	0.344543	-6.4	0.332031	-6.3	0.380493	-6.3	0.228882	-6.3	0.399231
-6.2	0.186707	-6.2	0.222656	-6.2	0.327332	-6.3	0.335144	-6.3	0.320313	-6.2	0.375793	-6.2	0.21405	-6.2	0.387512
-6.1	0.171875	-6.1	0.210938	-6.1	0.315613	-6.2	0.308594	-6.2	0.3172	-6.1	0.375793	-6.1	0.206238	-6.1	0.3797
-6	0.167175	-6	0.202332	-6	0.296082	-6.1	0.300781	-6.1	0.3125	-6	0.367981	-6	0.199219	-6	0.363281
-5.9	0.147644	-5.9	0.1875	-5.9	0.273438	-6	0.289063	-6	0.304688	-5.9	0.359375	-5.9	0.186707	-5.9	0.341431
-5.8	0.150757	-5.8	0.167969	-5.8	0.257019	-5.9	0.28125	-5.9	0.296082	-5.8	0.364075	-5.8	0.170288	-5.8	0.339844
-5.7	0.124207	-5.7	0.160156	-5.7	0.232788	-5.8	0.269531	-5.8	0.292969	-5.7	0.352356	-5.7	0.167969	-5.7	0.333618
-5.6	0.109375	-5.6	0.153137	-5.6	0.206238	-5.7	0.261719	-5.7	0.28125	-5.6	0.349243	-5.6	0.167175	-5.6	0.320313
-5.5	0.111694	-5.5	0.140625	-5.5	0.206238	-5.6	0.25	-5.6	0.269531	-5.5	0.344543	-5.5	0.155457	-5.5	0.305481
-5.4	0.109375	-5.4	0.132019	-5.4	0.186707	-5.5	0.230469	-5.5	0.261719	-5.4	0.336731	-5.4	0.135925	-5.4	0.28595
-5.3	0.0968628	-5.3	0.133606	-5.3	0.178894	-5.4	0.210938	-5.4	0.242188	-5.3	0.325012	-5.3	0.116394	-5.3	0.274231
-5.2	0.0999756	-5.2	0.128906	-5.2	0.155457	-5.3	0.199219	-5.3	0.235168	-5.2	0.320313	-5.2	0.107788	-5.2	0.266418
-5.1	0.0898438	-5.1	0.128906	-5.1	0.135925	-5.2	0.179688	-5.2	0.234375	-5.1	0.313293	-5.1	0.109375	-5.1	0.2547
-5	0.0804443	-5	0.104675	-5	0.128113	-5.1	0.167969	-5.1	0.222656	-5	0.317993	-5	0.107788	-5	0.235168
-4.9	0.0703125	-4.9	0.0898438	-4.9	0.108582	-5	0.148438	-5	0.206238	-4.9	0.3172	-4.9	0.0976563	-4.9	0.232056
-4.8	0.0656128	-4.8	0.0750122	-4.8	0.101563	-4.9	0.145325	-4.9	0.210938	-4.8	0.310181	-4.8	0.0734253	-4.8	0.215637
-4.7	0.0625	-4.7	0.053894	-4.7	0.0921631	-4.8	0.140625	-4.8	0.196106	-4.7	0.300781	-4.7	0.0703125	-4.7	0.21875
-4.6	0.0578003	-4.6	0.0515747	-4.6	0.0820313	-4.7	0.132813	-4.7	0.203125	-4.6	0.28595	-4.6	0.0609131	-4.6	0.203918
-4.5	0.0499878	-4.5	0.055481	-4.5	0.0726318	-4.6	0.121094	-4.6	0.186707	-4.5	0.28595	-4.5	0.0507813	-4.5	0.200806
-4.4	0.0218506	-4.4	0.053894	-4.4	0.0703125	-4.5	0.104675	-4.5	0.196106	-4.4	0.278931	-4.4	0.0491943	-4.4	0.196106
-4.3	0.00311279	-4.3	0.0507813	-4.3	0.0460815	-4.4	0.102356	-4.4	0.203125	-4.3	0.28595	-4.3	0.0273438	-4.3	0.191406
-4.2	0.00701904	-4.2	0.0437622	-4.2	0.0413818	-4.3	0.101563	-4.3	0.191406	-4.2	0.278137	-4.2	0.0179443	-4.2	0.181274
-4.1	0.00701904	-4.1	0.03125	-4.1	0.03125	-4.2	0.0820313	-4.2	0.188293	-4.1	0.261719	-4.1	0.0195313	-4.1	0.176575
-4	2.27374E-13	-4	0.022644	-4	0.03125	-4.1	0.0656128	-4.1	0.186707	-4	0.242981	-4	0.022644	-4	0.160156
-3.9	0.00701904	-3.9	0.015625	-3.9	0.038269	-4	0.055481	-4	0.191406	-3.9	0.239868	-3.9	0.03125	-3.9	0.157837
-3.8	-0.0125122	-3.8	0.024231	-3.8	0.038269	-3.9	0.0507813	-3.9	0.171875	-3.8	0.246887	-3.8	0.0148315	-3.8	0.157043
-3.7	-0.00939941	-3.7	0.024231	-3.7	0.038269	-3.8	0.03125	-3.8	0.164856	-3.7	0.235168	-3.7	0.0101318	-3.7	0.142212
-3.6	-0.0078125	-3.6	0.0265503	-3.6	0.0265503	-3.7	0.024231	-3.7	0.164063	-3.6	0.230469	-3.6	0.0078125	-3.6	0.140625
-3.5	0.00701904	-3.5	0.0195313	-3.5	0.038269	-3.6	0.0265503	-3.6	0.155457	-3.5	0.215637	-3.5	0.00701904	-3.5	0.133606
-3.4	0.0117188	-3.4	0.0078125	-3.4	0.0265503	-3.5	0.0195313	-3.5	0.152344	-3.4	0.1922	-3.4	-0.00158691	-3.4	0.130493
-3.3	0.0101318	-3.3	0.0125122	-3.3	0.0265503	-3.4	0.0164185	-3.4	0.145325	-3.3	0.189087	-3.3	2.27374E-13	-3.3	0.125793
-3.2	0.0117188	-3.2	0.0148315	-3.2	0.0265503	-3.3	0.0148315	-3.3	0.152344	-3.2	0.199219	-3.2	-0.00158691	-3.2	0.121094
-3.1	0.0101318	-3.1	0.024231	-3.1	0.03125	-3.2	0	-3.2	0.144531	-3.1	0.1922	-3.1	0.0125122	-3.1	0.130493
-3	0.0117188	-3	0.0195313	-3	0.0218506	-3.1	-0.00701904	-3.1	0.135925	-3	0.189087	-3	0.0218506	-3	0.125793
-2.9	0.0218506	-2.9	0.0148315	-2.9	0.03125	-3	-0.0078125	-3	0.145325	-2.9	0.189087	-2.9	0.0195313	-2.9	0.109375
-2.8	0.0148315	-2.8	0.0172119	-2.8	0.0218506	-2.9	-0.00469971	-2.9	0.140625	-2.8	0.176575	-2.8	0.0179443	-2.8	0.110962
-2.7	0.0195313	-2.7	0.0343628	-2.7	0.022644	-2.8	0.00469971	-2.8	0.135925	-2.7	0.168762	-2.7	0.0273438	-2.7	0.110962
-2.6	0.0148315	-2.6	0.0359497	-2.6	0.03125	-2.7	0	-2.7	0.140625	-2.6	0.148438	-2.6	0.0265503	-2.6	0.101563
-2.5	0.0195313	-2.5	0.0343628	-2.5	0.0234375	-2.6	0.0078125	-2.6	0.125793	-2.5	0.145325	-2.5	0.022644	-2.5	0.0945435
-2.4	0.0218506	-2.4	0.0351563	-2.4	0.0218506	-2.5	0.0164185	-2.5	0.128906	-2.4	0.133606	-2.4	0.0265503	-2.4	0.0797119
-2.3	0.0148315	-2.3	0.0437622	-2.3	0.0117188	-2.4	0.03125	-2.4	0.132813	-2.3	0.130493	-2.3	0.0296631	-2.3	0.0820313
-2.2	0.0148315	-2.2	0.0421753	-2.2	0.0265503	-2.3	0.03125	-2.3	0.125793	-2.2	0.117981	-2.2	0.0390625	-2.2	0.0750122
-2.1	0.0265503	-2.1	0.0437622	-2.1	0.0218506	-2.2	0.0265503	-2.2	0.116394	-2.1	0.109375	-2.1	0.0390625	-2.1	0.055481
-2	0.0195313	-2	0.0437622	-2	0.03125	-2.1	0.024231	-2.1	0.114075	-2	0.106262	-2	0.0413818	-2	0.0601807
-1.9	0.0296631	-1.9	0.0585938	-1.9	0.0265503	-2	0.022644	-2	0.116394	-1.9	0.0992432	-1.9	0.0507813	-1.9	0.0476685
-1.8	0.03125	-1.8	0.053894	-1.8	0.0148315	-1.9	0.0273438	-1.9	0.106262	-1.8	0.0945435	-1.8	0.0491943	-1.8	0.0390625
-1.7	0.0343628	-1.7	0.0632935	-1.7	0.03125	-1.8	0.024231	-1.8	0.117981	-1.7	0.086731	-1.7	0.053894	-1.7	0.0484619
-1.6	0.0460815	-1.6	0.0656128	-1.6	0.038269	-1.7	0.0164185	-1.7	0.105469	-1.6	0.0898438	-1.6	0.0507813	-1.6	0.0359497
-1.5	0.0460815	-1.5	0.0585938	-1.5	0.0304565	-1.6	0.0148315	-1.6	0.0968628	-1.5	0.0828247	-1.5	0.0460815	-1.5	0.0390625
-1.4	0.0625	-1.4	0.0515747	-1.4	0.0218506	-1.5	0.0195313	-1.5	0.0984497	-1.4	0.0679932	-1.4	0.053894	-1.4	0.0289307
-1.3	0.0656128	-1.3	0.0585938	-1.3	0.00701904	-1.4	0.0195313	-1.4	0.0968628	-1.3	0.0671997	-1.3	0.053894	-1.3	0.0289307
-1.2	0.0773315	-1.2	0.0585938	-1.2	2.27374E-13	-1.3	0.024231	-1.3	0.0898438	-1.2	0.0585938	-1.2	0.0460815	-1.2	0.0390625
-1.1	0.0609131	-1.1	0.055481	-1.1	0.00231934	-1.2	0.0234375	-1.2	0.086731	-1.1	0.0484619	-1.1	0.0491943	-1.1	0.0406494
-1	0.0507813	-1	0.053894	-1	-0.00469971	-1.1	0.0117188	-1.1	0.09375	-1	0.0437622	-1	0.0585938	-1	0.03125
-0.900002	0.0460815	-0.900002	0.0437622	-0.900002	-0.00469971	-1	0.0195313	-1	0.085144	-0.900002	0.0359497	-0.900002	0.053894	-0.900002	0.024231
-0.799999	0.0429688	-0.799999	0.0460815	-0.799999	-0.0078125	-0.899998	0.0117188	-0.899998	0.0750122	-0.799999	0.0289307	-0.799999	0.0507813	-0.799999	0.0289307
-0.700001	0.0335693	-0.700001	0.0390625	-0.700001	-0.00939941	-0.799999	0.0148315	-0.799999	0.0742188	-0.700001	0.0164185	-0.700001	0.0609131	-0.700001	0.03125
-0.600002	0.03125	-0.600002	0.0273438	-0.600002	2.27374E-13	-0.700001	0.0125122	-0.700001	0.0656128	-0.600002	0.0195313	-0.600002	0.053894	-0.600002	0.0289307
-0.5	0.0296631	-0.5	0.0195313	-0.5	2.27374E-13	-0.599998	0.0164185	-0.599998	0.0632935	-0.5	0.00469971	-0.5	0.0507813	-0.5	0.03125
-0.400002	0.0265503	-0.400002	0.0125122	-0.400002	0.00231934	-0.5	0.0117188	-0.5	0.055481	-0.400002	0.00939941	-0.400002	0.0460815	-0.400002	0.0125122
-0.299999	0.0117188	-0.299999	0.0148315	-0.299999	2.27374E-13	-0.399998	0.00701904	-0.399998	0.0578003	-0.299999	0.0078125	-0.299999	0.0343628	-0.299999	0.00939941
-0.200001	0.00701904	-0.200001	0.0078125	-0.200001	-7.93457E-4	-0.299999	0	-0.299999	0.03125	-0.200001	0.00939941	-0.200001	0.0148315	-0.200001	0.00939941
-0.100002	0.00231934	-0.100002	0.00469971	-0.100002	0.00231934	-0.200001	0.00469971	-0.200001	0.0164185	-0.100002	0.00469971	-0.100002	-0.00158691	-0.100002	0.00860596
0	2.27374E-13	0	0	0	2.27374E-13	-0.0999985	0.00311279	-0.0999985	0.0148315	0	-2.27374E-13	0	2.27374E-13	0	-2.27374E-13
0.0999985	-0.00939941	0.0999985	0.00469971	0.0999985	-7.93457E-4	0	0	0	0	0.0999985	-0.00231934	0.0999985	-0.00469971	0.0999985	0.00158691
0.200001	-0.0164185	0.200001	0	0.200001	-0.0125122	0.100002	-0.00701904	0.100002	-0.00311279	0.200001	0.00158691	0.200001	-0.0164185	0.200001	-0.00311279
0.299999	-0.0195313	0.299999	-0.00469971	0.299999	-0.0172119	0.200001	-0.0078125	0.200001	-0.015625	0.299999	-2.27374E-13	0.299999	-0.0164185	0.299999	-0.0078125
0.399998	-0.0195313	0.399998	-0.0195313	0.399998	-0.024231	0.299999	-0.0164185	0.299999	-0.024231	0.399998	-0.00311279	0.399998	-0.024231	0.399998	-0.0101318
0.5	-0.0289307	0.5	-0.03125	0.5	-0.024231	0.400002	-0.03125	0.400002	-0.0343628	0.5	-0.00701904	0.5	-0.0390625	0.5	-0.0117188
0.599998	-0.0195313	0.599998	-0.0343628	0.599998	-0.0390625	0.5	-0.0343628	0.5	-0.024231	0.599998	-0.00701904	0.599998	-0.0406494	0.599998	-0.0101318
0.700001	-0.0289307	0.700001	-0.0390625	0.700001	-0.024231	0.600002	-0.0359497	0.600002	-0.0343628	0.700001	-0.0101318	0.700001	-0.0359497	0.700001	-0.0148315
0.799999	-0.0437622	0.799999	-0.055481	0.799999	-0.0320435	0.700001	-0.0507813	0.700001	-0.0390625	0.799999	-0.0148315	0.799999	-0.055481	0.799999	-0.0265503
0.899998	-0.0507813	0.899998	-0.0625	0.899998	-0.0359497	0.799999	-0.0578003	0.799999	-0.046875	0.899998	-0.0148315	0.899998	-0.0632935	0.899998	-0.022644
1	-0.0601807	1	-0.0656128	1	-0.0320435	0.900002	-0.053894	0.900002	-0.053894	1	-0.0148315	1	-0.0750122	1	-0.0296631
1.1	-0.0632935	1.1	-0.0671997	1.1	-0.0390625	1	-0.0632935	1	-0.0632935	1.1	-0.0265503	1.1	-0.0789185	1.1	-0.03125
1.2	-0.0703125	1.2	-0.0703125	1.2	-0.0320435	1.1	-0.0703125	1.1	-0.0656128	1.2	-0.0265503	1.2	-0.0750122	1.2	-0.0296631
1.3	-0.0797119	1.3	-0.0773315	1.3	-0.0367432	1.2	-0.085144	1.2	-0.078125	1.3	-0.0296631	1.3	-0.0820313	1.3	-0.0343628
1.4	-0.0898438	1.4	-0.086731	1.4	-0.0437622	1.3	-0.0898438	1.3	-0.078125	1.4	-0.0390625	1.4	-0.0718994	1.4	-0.0390625
1.5	-0.0945435	1.5	-0.0898438	1.5	-0.0585938	1.4	-0.0945435	1.4	-0.078125	1.5	-0.0460815	1.5	-0.0820313	1.5	-0.0491943
1.6	-0.109375	1.6	-0.0968628	1.6	-0.0632935	1.5	-0.0968628	1.5	-0.0945435	1.6	-0.0460815	1.6	-0.0828247	1.6	-0.0460815
1.7	-0.118774	1.7	-0.109375	1.7	-0.0632935	1.6	-0.086731	1.6	-0.0929565	1.7	-0.0460815	1.7	-0.0945435	1.7	-0.0421753
1.8	-0.133606	1.8	-0.116394	1.8	-0.0679932	1.7	-0.0898438	1.7	-0.0976563	1.8	-0.0460815	1.8	-0.103149	1.8	-0.0491943
1.9	-0.140625	1.9	-0.114075	1.9	-0.0750122	1.8	-0.104675	1.8	-0.0898438	1.9	-0.0491943	1.9	-0.101563	1.9	-0.0585938
2	-0.150024	2	-0.116394	2	-0.078125	1.9	-0.121094	1.9	-0.0976563	2	-0.0507813	2	-0.0945435	2	-0.0491943
2.1	-0.160156	2.1	-0.125793	2.1	-0.071106	2	-0.128906	2	-0.104675	2.1	-0.0460815	2.1	-0.0945435	2.1	-0.0585938
2.2	-0.157837	2.2	-0.135925	2.2	-0.0828247	2.1	-0.143738	2.1	-0.102356	2.2	-0.0531006	2.2	-0.101563	2.2	-0.0656128
2.3	-0.160156	2.3	-0.140625	2.3	-0.086731	2.2	-0.148438	2.2	-0.109375	2.3	-0.0507813	2.3	-0.0992432	2.3	-0.0804443
2.4	-0.167969	2.4	-0.145325	2.4	-0.0828247	2.3	-0.153137	2.3	-0.124207	2.4	-0.0578003	2.4	-0.114075	2.4	-0.078125
2.5	-0.169556	2.5	-0.147644	2.5	-0.0945435	2.4	-0.160156	2.4	-0.133606	2.5	-0.0609131	2.5	-0.125793	2.5	-0.0804443
2.6	-0.179688	2.6	-0.155457	2.6	-0.0976563	2.5	-0.163269	2.5	-0.135925	2.6	-0.0687256	2.6	-0.140625	2.6	-0.0929565
2.7	-0.177368	2.7	-0.153137	2.7	-0.0875244	2.6	-0.167969	2.6	-0.133606	2.7	-0.0734253	2.7	-0.150024	2.7	-0.0968628
2.8	-0.1875	2.8	-0.167175	2.8	-0.0976563	2.7	-0.176575	2.7	-0.140625	2.8	-0.0898438	2.8	-0.152344	2.8	-0.104675
2.9	-0.203918	2.9	-0.179688	2.9	-0.0992432	2.8	-0.179688	2.8	-0.155457	2.9	-0.0968628	2.9	-0.150024	2.9	-0.119507
3	-0.208618	3	-0.184387	3	-0.0976563	2.9	-0.191406	2.9	-0.163269	3	-0.0999756	3	-0.152344	3	-0.128906
3.1	-0.210938	3.1	-0.186707	3.1	-0.114075	3	-0.194519	3	-0.153137	3.1	-0.101563	3.1	-0.153137	3.1	-0.131226
3.2	-0.220337	3.2	-0.199219	3.2	-0.114075	3.1	-0.196106	3.1	-0.167969	3.2	-0.0999756	3.2	-0.161743	3.2	-0.143738
3.3	-0.21405	3.3	-0.203918	3.3	-0.109375	3.2	-0.186707	3.2	-0.174988	3.3	-0.104675	3.3	-0.157043	3.3	-0.148438
3.4	-0.220337	3.4	-0.206238	3.4	-0.107056	3.3	-0.179688	3.3	-0.175781	3.4	-0.0968628	3.4	-0.152344	3.4	-0.163269
3.5	-0.21875	3.5	-0.215637	3.5	-0.114075	3.4	-0.179688	3.4	-0.1922	3.5	-0.0929565	3.5	-0.140625	3.5	-0.170288
3.6	-0.228149	3.6	-0.217957	3.6	-0.114075	3.5	-0.1828	3.5	-0.199219	3.6	-0.0999756	3.6	-0.133606	3.6	-0.174988
3.7	-0.230469	3.7	-0.225769	3.7	-0.121887	3.6	-0.184387	3.6	-0.194519	3.7	-0.101563	3.7	-0.138306	3.7	-0.1828
3.8	-0.239868	3.8	-0.235168	3.8	-0.128906	3.7	-0.194519	3.7	-0.195313	3.8	-0.0921631	3.8	-0.140625	3.8	-0.199219
3.9	-0.25	3.9	-0.2453	3.9	-0.141418	3.8	-0.196106	3.8	-0.203918	3.9	-0.0898438	3.9	-0.145325	3.9	-0.209351
4	-0.259399	4	-0.242188	4	-0.153137	3.9	-0.194519	3.9	-0.206238	4	-0.0968628	4	-0.161743	4	-0.21405
4.1	-0.269531	4.1	-0.235168	4.1	-0.157837	4	-0.196106	4	-0.21875	4.1	-0.0999756	4.1	-0.160156	4.1	-0.228882
4.2	-0.269531	4.2	-0.242188	4.2	-0.160156	4.1	-0.206238	4.1	-0.22345	4.2	-0.101563	4.2	-0.172668	4.2	-0.238281
4.3	-0.267212	4.3	-0.257019	4.3	-0.16095	4.2	-0.1875	4.2	-0.225769	4.3	-0.0999756	4.3	-0.181274	4.3	-0.233582
4.4	-0.277344	4.4	-0.257813	4.4	-0.169556	4.3	-0.196106	4.3	-0.221863	4.4	-0.104675	4.4	-0.203125	4.4	-0.248413
4.5	-0.282043	4.5	-0.278137	4.5	-0.176575	4.4	-0.198425	4.4	-0.22345	4.5	-0.109375	4.5	-0.203918	4.5	-0.253113
4.6	-0.28595	4.6	-0.27655	4.6	-0.179688	4.5	-0.194519	4.5	-0.226563	4.6	-0.111694	4.6	-0.21875	4.6	-0.269531
4.7	-0.282043	4.7	-0.284363	4.7	-0.184387	4.6	-0.1875	4.6	-0.233582	4.7	-0.116394	4.7	-0.220337	4.7	-0.260132
4.8	-0.290649	4.8	-0.28595	4.8	-0.203918	4.7	-0.203918	4.7	-0.246094	4.8	-0.119507	4.8	-0.235168	4.8	-0.292175
4.9	-0.289063	4.9	-0.296082	4.9	-0.226563	4.8	-0.199219	4.8	-0.238281	4.9	-0.121094	4.9	-0.2547	4.9	-0.320313
5	-0.296875	5	-0.325012	5	-0.231262	4.9	-0.225769	4.9	-0.235168	5	-0.124207	5	-0.274231	5	-0.330444
5.1	-0.317993	5.1	-0.346863	5.1	-0.247681	5	-0.238281	5	-0.2453	5.1	-0.131226	5.1	-0.297668	5.1	-0.339844
5.2	-0.328125	5.2	-0.356262	5.2	-0.257813	5.1	-0.2547	5.1	-0.277344	5.2	-0.143738	5.2	-0.3172	5.2	-0.361694
5.3	-0.349243	5.3	-0.385925	5.3	-0.278931	5.2	-0.269531	5.2	-0.303894	5.3	-0.160156	5.3	-0.359375	5.3	-0.382019
5.4	-0.371094	5.4	-0.410156	5.4	-0.282043	5.3	-0.27655	5.3	-0.313293	5.4	-0.174988	5.4	-0.395325	5.4	-0.408569
5.5	-0.395325	5.5	-0.436707	5.5	-0.300781	5.4	-0.293762	5.4	-0.339844	5.5	-0.201538	5.5	-0.411743	5.5	-0.429688
5.6	-0.422668	5.6	-0.453918	5.6	-0.301575	5.5	-0.3125	5.5	-0.362488	5.6	-0.21405	5.6	-0.429688	5.6	-0.439819
5.7	-0.450806	5.7	-0.46875	5.7	-0.332825	5.6	-0.315613	5.6	-0.386719	5.7	-0.2453	5.7	-0.438293	5.7	-0.449219
5.8	-0.460938	5.8	-0.483582	5.8	-0.360962	5.7	-0.342957	5.7	-0.414856	5.8	-0.261719	5.8	-0.453918	5.8	-0.471069
5.9	-0.480469	5.9	-0.5047	5.9	-0.371094	5.8	-0.347656	5.8	-0.424988	5.9	-0.27655	5.9	-0.46875	5.9	-0.480469
6	-0.489868	6	-0.507019	6	-0.378906	5.9	-0.367188	5.9	-0.445313	6	-0.296082	6	-0.478149	6	-0.490601
6.1	-0.5047	6.1	-0.524231	6.1	-0.407837	6	-0.383606	6	-0.47345	6.1	-0.315613	6.1	-0.5047	6.1	-0.503113
6.2	-0.527344	6.2	-0.538269	6.2	-0.422668	6.1	-0.410156	6.1	-0.488281	6.2	-0.342163	6.2	-0.519531	6.2	-0.534363
6.3	-0.540649	6.3	-0.53595	6.3	-0.434387	6.2	-0.424988	6.2	-0.514832	6.3	-0.354675	6.3	-0.543762	6.3	-0.550781
6.4	-0.555481	6.4	-0.5578	6.4	-0.434387	6.3	-0.453918	6.3	-0.543762	6.4	-0.374207	6.4	-0.560181	6.4	-0.560913
6.5	-0.570313	6.5	-0.570313	6.5	-0.46875	6.4	-0.460938	6.4	-0.570313	6.5	-0.402344	6.5	-0.575012	6.5	-0.573425
6.6	-0.571106	6.6	-0.596863	6.6	-0.481262	6.5	-0.488281	6.5	-0.592957	6.6	-0.424988	6.6	-0.601563	6.6	-0.585144
6.7	-0.587524	6.7	-0.614075	6.7	-0.497681	6.6	-0.53125	6.6	-0.604675	6.7	-0.443726	6.7	-0.614075	6.7	-0.592957
6.8	-0.609375	6.8	-0.628906	6.8	-0.5	6.7	-0.553894	6.7	-0.614075	6.8	-0.475769	6.8	-0.642212	6.8	-0.611694
6.9	-0.630493	6.9	-0.655457	6.9	-0.524231	6.8	-0.578125	6.8	-0.632019	6.9	-0.498413	6.9	-0.657043	6.9	-0.621094
7	-0.660156	7	-0.664856	7	-0.551575	6.9	-0.606262	6.9	-0.653137	7	-0.522644	7	-0.679688	7	-0.643738
7.1	-0.699219	7.1	-0.706238	7.1	-0.567993	7	-0.628906	7	-0.679688	7.1	-0.558594	7.1	-0.696106	7.1	-0.670288
7.2	-0.696899	7.2	-0.738281	7.2	-0.601563	7.1	-0.647644	7.1	-0.699219	7.2	-0.585144	7.2	-0.720337	7.2	-0.710938
7.3	-0.699219	7.3	-0.777344	7.3	-0.633606	7.2	-0.667969	7.2	-0.725769	7.3	-0.611694	7.3	-0.746887	7.3	-0.733582
7.4	-0.711731	7.4	-0.805481	7.4	-0.672668	7.3	-0.6875	7.3	-0.746094	7.4	-0.663269	7.4	-0.761719	7.4	-0.760132
7.5	-0.735168	7.5	-0.835144	7.5	-0.703918	7.4	-0.715637	7.4	-0.782043	7.5	-0.702332	7.5	-0.774231	7.5	-0.787476
7.6	-0.762512	7.6	-0.856262	7.6	-0.738281	7.5	-0.730469	7.5	-0.796082	7.6	-0.753113	7.6	-0.789063	7.6	-0.811707
7.7	-0.778931	7.7	-0.878113	7.7	-0.750793	7.6	-0.7453	7.6	-0.800781	7.7	-0.784363	7.7	-0.793762	7.7	-0.820313
7.8	-0.800781	7.8	-0.871094	7.8	-0.767212	7.7	-0.757813	7.7	-0.789063	7.8	-0.808594	7.8	-0.810181	7.8	-0.830444
7.9	-0.808594	7.9	-0.885925	7.9	-0.782043	7.8	-0.789063	7.8	-0.796875	7.9	-0.827332	7.9	-0.800781	7.9	-0.831238
8	-0.829712	8	-0.883606	8	-0.796875	7.9	-0.789063	7.9	-0.811707	8	-0.849976	8	-0.813293	8	-0.839844
8.1	-0.844543	8.1	-0.890625	8.1	-0.821106	8	-0.796082	8	-0.801575	8.1	-0.862488	8.1	-0.802368	8.1	-0.838257
8.2	-0.883606	8.2	-0.897644	8.2	-0.837524	8.1	-0.793762	8.1	-0.792175	8.2	-0.885925	8.2	-0.792969	8.2	-0.842957
8.3	-0.890625	8.3	-0.898438	8.3	-0.844543	8.2	-0.789063	8.2	-0.785156	8.3	-0.913269	8.3	-0.790649	8.3	-0.839844
8.4	-0.900024	8.4	-0.917969	8.4	-0.867188	8.3	-0.789063	8.3	-0.782043	8.4	-0.921875	8.4	-0.78125	8.4	-0.842163
8.5	-0.914856	8.5	-0.926575	8.5	-0.871887	8.4	-0.800781	8.4	-0.777344	8.5	-0.924988	8.5	-0.774231	8.5	-0.839844
8.6	-0.9375	8.6	-0.936707	8.6	-0.891418	8.5	-0.796082	8.5	-0.772644	8.6	-0.944519	8.6	-0.78125	8.6	-0.846863
8.7	-0.939087	8.7	-0.946106	8.7	-0.903137	8.6	-0.789063	8.6	-0.774231	8.7	-0.963257	8.7	-0.778931	8.7	-0.849976
8.8	-0.949219	8.8	-0.956238	8.8	-0.891418	8.7	-0.793762	8.7	-0.764832	8.8	-0.975769	8.8	-0.774231	8.8	-0.849976
8.9	-0.958618	8.9	-0.944519	8.9	-0.903137	8.8	-0.77655	8.8	-0.75	8.9	-0.959351	8.9	-0.769531	8.9	-0.847656
9	-0.960938	9	-0.946106	9	-0.907837	8.9	-0.769531	8.9	-0.733582	9	-0.960938	9	-0.771118	9	-0.849976
9.1	-0.957031	9.1	-0.96405	9.1	-0.910156	9	-0.777344	9	-0.742981	9.1	-0.956238	9.1	-0.769531	9.1	-0.847656
9.2	-0.939087	9.2	-0.97345	9.2	-0.926575	9.1	-0.789063	9.1	-0.733582	9.2	-0.96405	9.2	-0.771118	9.2	-0.861694
9.3	-0.907043	9.3	-0.975769	9.3	-0.929688	9.2	-0.78595	9.2	-0.726563	9.3	-0.956238	9.3	-0.761719	9.3	-0.851563
9.4	-0.890625	9.4	-0.996887	9.4	-0.934387	9.3	-0.764832	9.3	-0.735168	9.4	-0.971069	9.4	-0.762512	9.4	-0.849976
9.5	-0.864075	9.5	-0.992188	9.5	-0.9422	9.4	-0.757813	9.4	-0.71405	9.5	-0.980469	9.5	-0.759399	9.5	-0.854675
9.6	-0.821106	9.6	-0.980469	9.6	-0.930481	9.5	-0.777344	9.5	-0.726563	9.6	-0.975769	9.6	-0.761719	9.6	-0.871094
9.7	-0.793762	9.7	-0.956238	9.7	-0.919556	9.6	-0.766418	9.6	-0.72345	9.7	-0.975769	9.7	-0.735168	9.7	-0.842163
9.8	-0.757813	9.8	-0.934387	9.8	-0.903137	9.7	-0.7453	9.7	-0.710938	9.8	-0.959351	9.8	-0.71875	9.8	-0.818726
9.9	-0.731262	9.9	-0.917175	9.9	-0.890625	9.8	-0.730469	9.8	-0.694519	9.9	-0.941406	9.9	-0.72345	9.9	-0.777344
10	-0.703918	10	-0.885925	10	-0.871887	9.9	-0.71405	9.9	-0.667969	10	-0.917175	10	-0.708618	10	-0.764832
10.1	-0.664856	10.1	-0.875793	10.1	-0.852356	10	-0.699219	10	-0.65155	10.1	-0.893738	10.1	-0.699219	10.1	-0.753113
10.2	-0.645325	10.2	-0.890625	10.2	-0.852356	10.1	-0.6875	10.1	-0.633606	10.2	-0.881226	10.2	-0.6922	10.2	-0.753113
10.3	-0.606262	10.3	-0.874207	10.3	-0.839844	10.2	-0.676575	10.2	-0.624207	10.3	-0.871094	10.3	-0.703918	10.3	-0.760132
10.4	-0.578125	10.4	-0.859375	10.4	-0.806274	10.3	-0.660156	10.3	-0.621887	10.4	-0.846863	10.4	-0.700806	10.4	-0.730469
10.5	-0.582825	10.5	-0.836731	10.5	-0.796875	10.4	-0.660156	10.4	-0.604675	10.5	-0.830444	10.5	-0.703918	10.5	-0.721069
10.6	-0.563293	10.6	-0.820313	10.6	-0.778931	10.5	-0.655457	10.5	-0.602356	10.6	-0.820313	10.6	-0.710938	10.6	-0.721863
10.7	-0.540649	10.7	-0.832031	10.7	-0.761719	10.6	-0.628906	10.6	-0.604675	10.7	-0.810913	10.7	-0.715637	10.7	-0.733582
10.8	-0.523438	10.8	-0.815613	10.8	-0.735168	10.7	-0.660156	10.7	-0.597656	10.8	-0.815613	10.8	-0.703918	10.8	-0.741394
10.9	-0.496887	10.9	-0.825012	10.9	-0.71875	10.8	-0.645325	10.8	-0.628906	10.9	-0.799194	10.9	-0.712524	10.9	-0.730469
11	-0.438293	11	-0.8125	11	-0.684387	10.9	-0.640625	10.9	-0.614075	11	-0.789063	11	-0.722656	11	-0.689819
11.1	-0.410156	11.1	-0.8078	11.1	-0.6922	11	-0.635925	11	-0.611694	11.1	-0.796082	11.1	-0.735168	11.1	-0.667175
11.2	-0.402344	11.2	-0.764832	11.2	-0.684387	11.1	-0.628906	11.1	-0.589844	11.2	-0.823425	11.2	-0.720337	11.2	-0.635925
11.3	-0.360962	11.3	-0.78595	11.3	-0.696106	11.2	-0.621094	11.2	-0.563293	11.3	-0.8078	11.3	-0.730469	11.3	-0.619507
11.4	-0.480469	11.4	-0.800781	11.4	-0.679688	11.3	-0.589844	11.3	-0.585144	11.4	-0.819519	11.4	-0.7547	11.4	-0.558594
11.5	-0.594543	11.5	-0.722656	11.5	-0.711731	11.4	-0.585144	11.4	-0.594543	11.5	-0.815613	11.5	-0.808594	11.5	-0.424194
11.6	-0.676575	11.6	-0.75	11.6	-0.750793	11.5	-0.550781	11.5	-0.538269	11.6	-0.873413	11.6	-0.868774	11.6	-0.576538
11.7	-0.867188	11.7	-1.25311	11.7	-1.00079	11.6	-0.558594	11.6	-0.604675	11.7	-0.924988	11.7	-0.652344	11.7	-0.8797
11.8	-1.78284	11.8	-1.42267	11.8	-1.45001	11.7	-0.7547	11.7	-0.585938	11.8	-0.971863	11.8	-1.17737	11.8	-1.37421
11.9	-3.25861	11.9	-2.44922	11.9	-1.9422	11.8	-1.51483	11.8	-0.821106	11.9	-1.34766	11.9	-1.64142	11.9	-2.18982
12	-5.25549	12	-3.46484	12	-2.89612	11.9	-2.26563	11.9	-1.75861	12	-2.2453	12	-2.31329	12	-2.45233
12.1	-6.99298	12.1	-4.03986	12.1	-2.7547	12	-2.84766	12	-2.35547	12.1	-2.85468	12.1	-2.34454	12.1	-1.33594
12.2	-6.99298	12.2	-3.625	12.2	-1.34766	12.1	-2.37189	12.1	-2.23126	12.2	-1.86169	12.2	-0.400024	12.2	1.4422
12.3	-3.31018	12.3	-0.764038	12.3	2.01483	12.2	0.178894	12.2	0.0437622	12.3	0.940613	12.3	3.5	12.3	6.05078
12.4	5.41168	12.4	4.49219	12.4	7.35858	12.3	4.21484	12.3	4.34375	12.4	5.0719	12.4	9.20154	12.4	11.7227
12.5	19.9484	12.5	12.2274	12.5	13.9969	12.4	10.0922	12.4	9.98749	12.5	10.6523	12.5	15.7258	12.5	17.8664
12.6	39.2469	12.6	22.8109	12.6	22.0953	12.5	16.5453	12.5	16.6516	12.6	16.975	12.6	22.532	12.6	23.7516
12.7	63.7977	12.7	36.1789	12.7	31.389	12.6	24.1609	12.6	23.743	12.7	23.2844	12.7	29.3969	12.7	29.8094
12.8	93.0187	12.8	52.1149	12.8	42.4797	12.7	32.2648	12.7	31.2797	12.8	29.918	12.8	36.7711	12.8	36.6711
12.9	127.33	12.9	70.4852	12.9	55.125	12.8	41.4484	12.8	38.9133	12.9	36.9789	12.9	44.7945	12.9	43.9961
13	170.912	13	91.7813	13	68.7398	12.9	51.932	12.9	47.7813	13	45.0367	13	52.9703	13	50.2141
13.1	228.055	13.1	115.852	13.1	81.6523	13	62.4258	13	56.986	13.1	52.2399	13.1	58.382	13.1	49.8641
13.2	291.108	13.2	142.177	13.2	90.6664	13.1	68.8289	13.1	62.4391	13.2	53.4985	13.2	54.7781	13.2	40.5508
13.3	345.576	13.3	165.966	13.3	96.3578	13.2	68.4601	13.2	59.7109	13.3	46.5727	13.3	42.8156	13.3	27.8836
13.4	385.541	13.4	184.166	13.4	99.6406	13.3	63.8922	13.3	50.7406	13.4	35.4742	13.4	29.0375	13.4	16.9836
13.5	412.117	13.5	196.927	13.5	101.533	13.4	59.0586	13.4	40.8859	13.5	25.2383	13.5	17.9312	13.5	9.16486
13.6	427.696	13.6	204.602	13.6	102.243	13.5	55.1735	13.5	33.2523	13.6	17.9555	13.6	10.0547	13.6	3.73828
13.7	435.199	13.7	208.325	13.7	102.092	13.6	52.2367	13.6	27.7906	13.7	12.8125	13.7	5.09845	13.7	0.117981
13.8	436.934	13.8	209.141	13.8	101.075	13.7	50.0524	13.7	24.0594	13.8	9.33203	13.8	1.48517	13.8	-2.24609
13.9	434.282	13.9	207.93	13.9	99.4906	13.8	48.0828	13.8	21.4023	13.9	6.77423	13.9	-1.03284	13.9	-3.79529
14	428.732	14	205.207	14	97.3734	13.9	46.0859	13.9	19.3531	14	5.17267	14	-2.66565	14	-4.88593
14.1	420.204	14.1	201.563	14.1	94.9195	14	44.0953	14	17.6758	14.1	3.63983	14.1	-3.68518	14.1	-5.79767
14.2	410.046	14.2	197.194	14.2	92.3391	14.1	42.3469	14.1	16.1711	14.2	2.42426	14.2	-4.77893	14.2	-6.70392
14.3	398.452	14.3	192.242	14.3	89.3383	14.2	40.7336	14.2	14.8766	14.3	1.78674	14.3	-5.5	14.3	-7.17657
14.4	386.009	14.4	186.787	14.4	86.3492	14.3	38.9562	14.3	13.6227	14.4	1.08124	14.4	-5.83905	14.4	-7.46014
14.5	372.892	14.5	181.191	14.5	83.3172	14.4	37.3992	14.4	12.5195	14.5	0.628906	14.5	-6.125	14.5	-7.5625
14.6	358.909	14.6	175.52	14.6	80.2281	14.5	35.7445	14.5	11.7039	14.6	-0.116394	14.6	-6.49847	14.6	-7.50781
14.7	345.066	14.7	169.949	14.7	77.1547	14.6	34.1586	14.6	11.0734	14.7	-0.41095	14.7	-6.6922	14.7	-7.53046
14.8	330.922	14.8	164.133	14.8	73.932	14.7	32.6375	14.7	10.2023	14.8	-0.647644	14.8	-6.70862	14.8	-7.72345
14.9	317.204	14.9	158.17	14.9	70.8516	14.8	31.1836	14.8	9.47968	14.9	-0.929688	14.9	-6.65704	14.9	-7.75861
15	304.013	15	152.195	15	67.7062	14.9	29.7281	14.9	8.77576	15	-1.14606	15	-6.60547	15	-7.55469
15.1	291.151	15.1	146.344	15.1	64.6141	15	28.2117	15	8.25702	15.1	-1.44452	15.1	-6.5625	15.1	-7.26794
15.2	279.211	15.2	140.827	15.2	61.5547	15.1	26.725	15.1	7.73358	15.2	-1.59766	15.2	-6.40936	15.2	-7.25781
15.3	268.394	15.3	135.428	15.3	58.5367	15.2	25.3688	15.2	7.08514	15.3	-1.90625	15.3	-6.08203	15.3	-7.19611
15.4	258.5	15.4	130.137	15.4	55.5328	15.3	23.9727	15.3	6.51642	15.4	-2.06329	15.4	-6.09064	15.4	-7.12341
15.5	250.102	15.5	125.035	15.5	52.5609	15.4	22.5914	15.4	5.89453	15.5	-2	15.5	-6.07343	15.5	-6.91248
15.6	242.68	15.6	120.014	15.6	49.6382	15.5	21.2156	15.5	5.32581	15.6	-2.01093	15.6	-6.01019	15.6	-6.58124
15.7	236.401	15.7	115.211	15.7	46.6476	15.6	19.7703	15.6	4.7594	15.7	-2.32111	15.7	-5.83362	15.7	-6.3031
15.8	231.767	15.8	110.696	15.8	43.7687	15.7	18.3492	15.7	4.20313	15.8	-2.47577	15.8	-5.58282	15.8	-5.96796
15.9	227.976	15.9	106.56	15.9	40.8804	15.8	16.8336	15.8	3.6828	15.9	-2.56873	15.9	-5.57031	15.9	-5.74762
16	225.515	16	102.655	16	37.9727	15.9	15.2867	15.9	3.11407	16	-2.68512	16	-5.47266	16	-5.65076
16.1	224.23	16.1	98.657	16.1	35.032	16	13.7875	16	2.5578	16.1	-2.83826	16.1	-5.29297	16.1	-5.44684
16.2	224.089	16.2	95.5828	16.2	32.2508	16.1	12.2969	16.1	1.94611	16.2	-2.9859	16.2	-5.14301	16.2	-5.23199
16.3	224.973	16.3	92.257	16.3	29.5804	16.2	10.8148	16.2	1.35938	16.3	-3.13824	16.3	-4.94452	16.3	-5.14532
16.4	226.702	16.4	89.4109	16.4	26.9109	16.3	9.33514	16.3	0.707825	16.4	-3.32501	16.4	-4.81561	16.4	-5.03986
16.5	229.868	16.5	86.4601	16.5	24.2219	16.4	7.93048	16.4	0.0789185	16.5	-3.55231	16.5	-4.72894	16.5	-4.98981
16.6	233.891	16.6	84.0625	16.6	21.5594	16.5	6.52264	16.5	-0.65155	16.6	-3.78668	16.6	-4.71405	16.6	-4.95392
16.7	238.47	16.7	81.8727	16.7	19.0172	16.6	5.05469	16.6	-1.33435	16.7	-3.96484	16.7	-4.78363	16.7	-4.8703
16.8	244.364	16.8	80.2734	16.8	16.6125	16.7	3.6203	16.7	-1.97498	16.8	-4.15234	16.8	-4.77502	16.8	-4.77344
16.9	251.06	16.9	78.8359	16.9	14.2141	16.8	2.17657	16.8	-2.68201	16.9	-4.34375	16.9	-4.79926	16.9	-4.66406
17	258.772	17	77.2594	17	11.7023	16.9	0.721863	16.9	-3.38049	17	-4.48907	17	-4.89221	17	-4.59375
17.1	267.046	17.1	76.1149	17.1	9.30939	17	-0.697632	17	-4.01483	17.1	-4.71014	17.1	-4.97034	17.1	-4.49609
17.2	275.895	17.2	75.2156	17.2	7.15155	17.1	-2.11249	17.1	-4.67657	17.2	-4.93829	17.2	-4.99689	17.2	-4.40625
17.3	285.585	17.3	74.7656	17.3	5.08594	17.2	-3.64294	17.2	-5.38513	17.3	-5.11249	17.3	-4.97736	17.3	-4.38202
17.4	296.102	17.4	74.1906	17.4	2.99219	17.3	-5.16406	17.3	-6.11951	17.4	-5.34064	17.4	-4.99377	17.4	-4.31641
17.5	307	17.5	73.9641	17.5	0.9422	17.4	-6.63513	17.4	-6.87732	17.5	-5.67108	17.5	-5.02032	17.5	-4.29608
17.6	318.084	17.6	74.05	17.6	-1.0141	17.5	-8.10077	17.5	-7.61798	17.6	-6.01953	17.6	-5.06409	17.6	-4.22186
17.7	329.877	17.7	74.4094	17.7	-2.90472	17.6	-9.57422	17.6	-8.35779	17.7	-6.35468	17.7	-5.10236	17.7	-4.20624
17.8	342	17.8	75.0586	17.8	-4.59064	17.7	-11.0726	17.7	-9.11487	17.8	-6.66016	17.8	-5.12189	17.8	-4.22577
17.9	354.148	17.9	75.9281	17.9	-6.33441	17.8	-12.5812	17.8	-9.87421	17.9	-6.97577	17.9	-5.13361	17.9	-4.23828
18	366.396	18	77.0195	18	-7.96796	17.9	-14.0656	17.9	-10.6852	18	-7.30078	18	-5.17578	18	-4.23047
18.1	378.838	18.1	78.6531	18.1	-9.59924	18	-15.5016	18	-11.4781	18.1	-7.62421	18.1	-5.22815	18.1	-4.23749
18.2	391.235	18.2	80.6398	18.2	-11.2274	18.1	-16.9594	18.1	-12.2789	18.2	-7.94922	18.2	-5.28516	18.2	-4.23279
18.3	403.687	18.3	82.6086	18.3	-12.7023	18.2	-18.4289	18.2	-13.032	18.3	-8.22577	18.3	-5.46173	18.3	-4.23749
18.4	416.001	18.4	85.1016	18.4	-14.1	18.3	-19.8398	18.3	-13.8031	18.4	-8.57813	18.4	-5.53674	18.4	-4.24609
18.5	428.276	18.5	87.7758	18.5	-15.3625	18.4	-21.1774	18.4	-14.6071	18.5	-9.03436	18.5	-5.65314	18.5	-4.22498
18.6	440.38	18.6	90.8477	18.6	-16.4406	18.5	-22.5446	18.5	-15.4149	18.6	-9.43671	18.6	-5.77344	18.6	-4.24921
18.7	451.768	18.7	94.4398	18.7	-17.5578	18.6	-23.9313	18.6	-16.2164	18.7	-9.80389	18.7	-5.85626	18.7	-4.2453
18.8	463.189	18.8	98.2852	18.8	-18.5875	18.7	-25.2938	18.7	-17.0453	18.8	-10.1437	18.8	-5.97345	18.8	-4.24921
18.9	474.341	18.9	102.723	18.9	-19.5961	18.8	-26.6742	18.8	-17.8805	18.9	-10.4883	18.9	-6.08203	18.9	-4.27576
19	485.098	19	107.222	19	-20.5156	18.9	-28.0117	18.9	-18.6844	19	-10.8234	19	-6.1875	19	-4.35077
19.1	495.723	19.1	112.25	19.1	-21.443	19	-29.3211	19	-19.4938	19.1	-11.3039	19.1	-6.35236	19.1	-4.39374
19.2	505.655	19.2	117.726	19.2	-22.3312	19.1	-30.6641	19.1	-20.2859	19.2	-11.7188	19.2	-6.52423	19.2	-4.4281
19.3	515.513	19.3	123.509	19.3	-23.1289	19.2	-31.9852	19.2	-21.1141	19.3	-12.1281	19.3	-6.6875	19.3	-4.46326
19.4	524.87	19.4	129.774	19.4	-23.8063	19.3	-33.2742	19.3	-21.9391	19.4	-12.5344	19.4	-6.85236	19.4	-4.49609
19.5	533.885	19.5	136.018	19.5	-24.5226	19.4	-34.5812	19.4	-22.7594	19.5	-12.925	19.5	-7.00781	19.5	-4.53748
19.6	542.313	19.6	142.612	19.6	-25.1516	19.5	-35.764	19.5	-23.575	19.6	-13.3367	19.6	-7.18909	19.6	-4.58124
19.7	550.573	19.7	149.75	19.7	-25.8649	19.6	-36.9492	19.6	-24.4047	19.7	-13.757	19.7	-7.34766	19.7	-4.61951
19.8	558.427	19.8	157.111	19.8	-26.368	19.7	-38.1437	19.7	-25.2594	19.8	-14.1234	19.8	-7.54767	19.8	-4.63983
19.9	565.821	19.9	165.046	19.9	-26.832	19.8	-39.3265	19.8	-26.0836	19.9	-14.5148	19.9	-7.69611	19.9	-4.70233
20	573.13	20	173.203	20	-27.1828	19.9	-40.5226	19.9	-26.8828	20	-14.8984	20	-7.87891	20	-4.74841
20.1	580.195	20.1	181.558	20.1	-27.5258	20	-41.725	20	-27.7125	20.1	-15.3008	20.1	-8.02734	20.1	-4.79529
20.2	586.761	20.2	190.219	20.2	-27.9484	20.1	-42.8391	20.1	-28.5164	20.2	-15.7062	20.2	-8.20081	20.2	-4.86328
20.3	592.968	20.3	198.962	20.3	-28.2805	20.2	-43.9313	20.2	-29.3656	20.3	-16.1164	20.3	-8.36328	20.3	-4.96014
20.4	598.966	20.4	208.007	20.4	-28.4899	20.3	-44.9633	20.3	-30.1961	20.4	-16.4953	20.4	-8.51642	20.4	-5.02887
20.5	604.516	20.5	217.327	20.5	-28.6617	20.4	-46.068	20.4	-31.0211	20.5	-16.925	20.5	-8.6875	20.5	-5.10156
20.6	609.918	20.6	226.756	20.6	-28.6899	20.5	-47.1539	20.5	-31.8484	20.6	-17.3664	20.6	-8.83673	20.6	-5.19061
20.7	615.088	20.7	236.217	20.7	-28.8024	20.6	-48.132	20.6	-32.6656	20.7	-17.7734	20.7	-9	20.7	-5.28827
20.8	619.856	20.8	246.078	20.8	-28.8805	20.7	-49.0289	20.7	-33.4656	20.8	-18.182	20.8	-9.22034	20.8	-5.3656
20.9	624.674	20.9	255.765	20.9	-28.8984	20.8	-50.0226	20.8	-34.275	20.9	-18.6016	20.9	-9.42969	20.9	-5.48279
21	628.97	21	265.431	21	-28.8914	20.9	-50.9461	20.9	-35.0789	21	-19.0219	21	-9.62891	21	-5.59375
21.1	633.188	21.1	275.509	21.1	-28.8188	21	-51.8398	21	-35.8875	21.1	-19.4531	21.1	-9.8172	21.1	-5.68671
21.2	637.368	21.2	285.626	21.2	-28.568	21.1	-52.7414	21.1	-36.7047	21.2	-19.8734	21.2	-10.0117	21.2	-5.79529
21.3	641.073	21.3	295.61	21.3	-28.2633	21.2	-53.5922	21.2	-37.5281	21.3	-20.3055	21.3	-10.2039	21.3	-5.85388
21.4	644.846	21.4	305.716	21.4	-27.9594	21.3	-54.4016	21.3	-38.3211	21.4	-20.7328	21.4	-10.4102	21.4	-5.93671
21.5	648.476	21.5	315.764	21.5	-27.6266	21.4	-55.2601	21.4	-39.1071	21.5	-21.1523	21.5	-10.6289	21.5	-6.03516
21.6	651.937	21.6	325.901	21.6	-27.1078	21.5	-56.0891	21.5	-39.9031	21.6	-21.5726	21.6	-10.8055	21.6	-6.12732
21.7	655.124	21.7	335.937	21.7	-26.5797	21.6	-56.8688	21.6	-40.7344	21.7	-21.9922	21.7	-10.9899	21.7	-6.21014
21.8	658.157	21.8	346.097	21.8	-26.0078	21.7	-57.6039	21.7	-41.525	21.8	-22.4242	21.8	-11.2227	21.8	-6.28748
21.9	661.098	21.9	356.158	21.9	-25.3727	21.8	-58.3024	21.8	-42.3211	21.9	-22.8516	21.9	-11.4219	21.9	-6.38202
22	664.23	22	365.947	22	-24.7148	21.9	-58.9891	21.9	-43.1094	22	-23.2883	22	-11.6094	22	-6.45544
22.1	666.763	22.1	375.421	22.1	-23.9227	22	-59.6406	22	-43.8602	22.1	-23.7141	22.1	-11.818	22.1	-6.51874
22.2	669.337	22.2	385.091	22.2	-22.8602	22.1	-60.2703	22.1	-44.6609	22.2	-24.168	22.2	-12.0266	22.2	-6.61249
22.3	671.919	22.3	394.723	22.3	-21.8281	22.2	-60.9149	22.2	-45.4492	22.3	-24.6164	22.3	-12.2352	22.3	-6.66949
22.4	674.341	22.4	404.214	22.4	-20.7148	22.3	-61.4961	22.3	-46.1961	22.4	-25.0578	22.4	-12.4149	22.4	-6.76874
22.5	676.664	22.5	413.422	22.5	-19.5133	22.4	-62.0352	22.4	-46.9461	22.5	-25.4648	22.5	-12.6172	22.5	-6.85858
22.6	678.83	22.6	422.603	22.6	-18.2805	22.5	-62.5383	22.5	-47.7188	22.6	-25.8812	22.6	-12.8328	22.6	-6.92889
22.7	680.99	22.7	431.73	22.7	-16.9797	22.6	-63.0609	22.6	-48.4656	22.7	-26.3156	22.7	-13.0438	22.7	-7.04218
22.8	682.912	22.8	440.424	22.8	-15.4219	22.7	-63.5804	22.7	-49.2305	22.8	-26.75	22.8	-13.2078	22.8	-7.14764
22.9	684.841	22.9	449.137	22.9	-13.7946	22.8	-64.0453	22.8	-49.9609	22.9	-27.1828	22.9	-13.3742	22.9	-7.24451
23	686.58	23	457.852	23	-12.043	22.9	-64.5094	22.9	-50.7203	23	-27.6242	23	-13.5438	23	-7.35388
23.1	688.42	23.1	466.152	23.1	-10.1563	23	-64.9719	23	-51.4727	23.1	-28.0547	23.1	-13.743	23.1	-7.44843
23.2	690.366	23.2	474.464	23.2	-8.25702	23.1	-65.4266	23.1	-52.2148	23.2	-28.4633	23.2	-13.9461	23.2	-7.56171
23.3	692.375	23.3	482.662	23.3	-6.35547	23.2	-65.8969	23.2	-52.9297	23.3	-28.8703	23.3	-14.1453	23.3	-7.66248
23.4	694.122	23.4	490.65	23.4	-4.19379	23.3	-66.3649	23.3	-53.657	23.4	-29.257	23.4	-14.3516	23.4	-7.78827
23.5	695.816	23.5	498.207	23.5	-1.77655	23.4	-66.8258	23.4	-54.3742	23.5	-29.6672	23.5	-14.5508	23.5	-7.88983
23.6	697.461	23.6	505.772	23.6	0.702332	23.5	-67.2399	23.5	-55.0664	23.6	-30.0938	23.6	-14.7391	23.6	-7.99139
23.7	699.113	23.7	513.338	23.7	3.26794	23.6	-67.6696	23.6	-55.7726	23.7	-30.514	23.7	-14.9102	23.7	-8.10077
23.8	700.796	23.8	520.518	23.8	5.87579	23.7	-68.0898	23.7	-56.4383	23.8	-30.9172	23.8	-15.1211	23.8	-8.18121
23.9	702.206	23.9	527.491	23.9	8.54767	23.8	-68.5094	23.8	-57.1367	23.9	-31.3344	23.9	-15.3328	23.9	-8.28827
24	703.566	24	534.46	24	11.3375	23.9	-68.8304	23.9	-57.8281	24	-31.7453	24	-15.5391	24	-8.39764
24.1	704.91	24.1	541.297	24.1	14.3695	24	-69.125	24	-58.507	24.1	-32.1375	24.1	-15.7469	24.1	-8.49139
24.2	706.23	24.2	547.457	24.2	17.5984	24.1	-69.4219	24.1	-59.175	24.2	-32.5531	24.2	-15.9375	24.2	-8.58435
24.3	707.495	24.3	553.887	24.3	20.814	24.2	-69.6898	24.2	-59.8547	24.3	-32.9836	24.3	-16.1453	24.3	-8.70233
24.4	708.793	24.4	560.024	24.4	24.157	24.3	-69.9883	24.3	-60.5273	24.4	-33.4336	24.4	-16.332	24.4	-8.79218
24.5	710.003	24.5	566.139	24.5	27.7234	24.4	-70.3117	24.4	-61.2023	24.5	-33.8422	24.5	-16.5234	24.5	-8.89294
24.6	711.212	24.6	572.156	24.6	31.3969	24.5	-70.55	24.5	-61.8633	24.6	-34.2617	24.6	-16.7008	24.6	-8.99451
24.7	712.348	24.7	577.713	24.7	35.2156	24.6	-70.8344	24.6	-62.5031	24.7	-34.718	24.7	-16.9023	24.7	-9.08203
24.8	713.484	24.8	583.451	24.8	39.232	24.7	-71.2062	24.7	-63.1281	24.8	-35.175	24.8	-17.0969	24.8	-9.21014
24.9	714.633	24.9	588.909	24.9	43.1851	24.8	-71.525	24.8	-63.7414	24.9	-35.6133	24.9	-17.2828	24.9	-9.34607
25	715.759	25	594.068	25	47.1547	24.9	-71.8156	24.9	-64.3656	25	-36.0414	25	-17.4648	25	-9.44373
25.1	716.879	25.1	599.273	25.1	51.1719	25	-72.0789	25	-64.9875	25.1	-36.4922	25.1	-17.6516	25.1	-9.53516
25.2	717.959	25.2	604.218	25.2	55.3929	25.1	-72.3141	25.1	-65.5961	25.2	-36.9172	25.2	-17.9047	25.2	-9.66248
25.3	719.063	25.3	609.023	25.3	59.8265	25.2	-72.5797	25.2	-66.1789	25.3	-37.3617	25.3	-18.2117	25.3	-9.77264
25.4	720.083	25.4	613.714	25.4	64.3641	25.3	-72.8258	25.3	-66.7531	25.4	-37.7609	25.4	-18.4727	25.4	-9.8703
25.5	721.102	25.5	618.375	25.5	69.0258	25.4	-73.0039	25.4	-67.3625	25.5	-38.1594	25.5	-18.7633	25.5	-9.99451
25.6	722.158	25.6	622.567	25.6	73.7515	25.5	-73.15	25.5	-67.9547	25.6	-38.6047	25.6	-18.9922	25.6	-10.1008
25.7	723.176	25.7	627.289	25.7	78.5531	25.6	-73.3516	25.6	-68.5461	25.7	-39.0273	25.7	-19.1727	25.7	-10.2101
25.8	724.166	25.8	631.398	25.8	83.4312	25.7	-73.5797	25.7	-69.139	25.8	-39.3929	25.8	-19.3477	25.8	-10.3461
25.9	725.177	25.9	635.552	25.9	88.4164	25.8	-73.8289	25.8	-69.6344	25.9	-39.7922	25.9	-19.5945	25.9	-10.4633
26	726.186	26	639.567	26	93.5344	25.9	-74.0625	25.9	-70.2141	26	-40.1789	26	-19.793	26	-10.5664
26.1	727.028	26.1	643.302	26.1	98.6211	26	-74.2985	26	-70.6266	26.1	-40.6039	26.1	-20.0117	26.1	-10.6711
26.2	727.936	26.2	646.953	26.2	103.757	26.1	-74.5117	26.1	-71.0851	26.2	-40.9844	26.2	-20.2156	26.2	-10.7758
26.3	728.814	26.3	650.591	26.3	109.045	26.2	-74.6828	26.2	-71.7789	26.3	-41.3969	26.3	-20.4219	26.3	-10.8656
26.4	729.665	26.4	654.259	26.4	114.378	26.3	-74.8828	26.3	-72.3664	26.4	-41.7758	26.4	-20.6383	26.4	-10.9992
26.5	730.541	26.5	657.838	26.5	119.805	26.4	-75.0273	26.4	-72.9672	26.5	-42.3664	26.5	-20.8789	26.5	-11.1234
26.6	731.459	26.6	661.357	26.6	125.263	26.5	-75.1586	26.5	-73.4821	26.6	-42.9312	26.6	-21.0984	26.6	-11.1945
26.7	732.337	26.7	664.552	26.7	130.691	26.6	-75.3117	26.6	-73.943	26.7	-43.107	26.7	-21.3047	26.7	-11.2875
26.8	733.182	26.8	667.873	26.8	136.278	26.7	-75.4375	26.7	-74.4117	26.8	-43.4914	26.8	-21.5359	26.8	-11.382
26.9	733.994	26.9	670.782	26.9	142.07	26.8	-75.6195	26.8	-74.9	26.9	-43.968	26.9	-21.7492	26.9	-11.4719
27	734.837	27	673.858	27	147.823	26.9	-75.7891	26.9	-75.3688	27	-44.3664	27	-21.9344	27	-11.5773
27.1	735.678	27.1	676.724	27.1	153.638	27	-75.925	27	-75.818	27.1	-44.7961	27.1	-22.157	27.1	-11.6859
27.2	736.459	27.2	679.635	27.2	159.473	27.1	-76.0922	27.1	-76.275	27.2	-45.1789	27.2	-22.3563	27.2	-11.8078
27.3	737.229	27.3	682.373	27.3	165.101	27.2	-76.1969	27.2	-76.7633	27.3	-45.5922	27.3	-22.5695	27.3	-11.9523
27.4	737.991	27.4	685.135	27.4	170.956	27.3	-76.2367	27.3	-77.1961	27.4	-45.9766	27.4	-22.7695	27.4	-12.0648
27.5	738.748	27.5	687.725	27.5	176.801	27.4	-76.2594	27.4	-77.6461	27.5	-46.3656	27.5	-22.9821	27.5	-12.1945
27.6	739.533	27.6	690.358	27.6	182.504	27.5	-76.3219	27.5	-78.0945	27.6	-46.7687	27.6	-23.1914	27.6	-12.3438
27.7	740.268	27.7	692.855	27.7	188.369	27.6	-76.3602	27.6	-78.5164	27.7	-47.1711	27.7	-23.3906	27.7	-12.4789
27.8	741.03	27.8	695.268	27.8	194.268	27.7	-76.3836	27.7	-78.9476	27.8	-47.5695	27.8	-23.611	27.8	-12.5765
27.9	741.779	27.9	697.663	27.9	200.229	27.8	-76.4313	27.8	-79.4227	27.9	-47.9359	27.9	-23.8125	27.9	-12.6633
28	742.541	28	700.018	28	206.261	27.9	-76.4703	27.9	-79.8641	28	-48.3117	28	-24.0242	28	-12.7679
28.1	743.3	28.1	702.238	28.1	212.173	28	-76.5172	28	-80.2633	28.1	-48.7219	28.1	-24.257	28.1	-12.8586
28.2	743.972	28.2	704.451	28.2	217.906	28.1	-76.4844	28.1	-80.6406	28.2	-49.1039	28.2	-24.4609	28.2	-12.9797
28.3	744.686	28.3	706.676	28.3	223.665	28.2	-76.4688	28.2	-80.993	28.3	-49.5062	28.3	-24.657	28.3	-13.0914
28.4	745.323	28.4	708.882	28.4	229.502	28.3	-76.4625	28.3	-81.3625	28.4	-49.8945	28.4	-24.8445	28.4	-13.1594
28.5	745.968	28.5	711.034	28.5	235.341	28.4	-76.4211	28.4	-81.7391	28.5	-50.3031	28.5	-25.0508	28.5	-13.2656
28.6	746.619	28.6	712.921	28.6	241.249	28.5	-76.3828	28.5	-82.1172	28.6	-50.725	28.6	-25.2344	28.6	-13.3773
28.7	747.269	28.7	714.823	28.7	247.034	28.6	-76.3164	28.6	-82.4852	28.7	-51.1203	28.7	-25.407	28.7	-13.4672
28.8	747.93	28.8	716.656	28.8	252.876	28.7	-76.2188	28.7	-82.8328	28.8	-51.5187	28.8	-25.5984	28.8	-13.5734
28.9	748.58	28.9	718.543	28.9	258.79	28.8	-76.0726	28.8	-83.2109	28.9	-51.9164	28.9	-25.7734	28.9	-13.6547
29	749.221	29	720.363	29	264.742	28.9	-75.9484	28.9	-83.5391	29	-52.3242	29	-25.9336	29	-13.7805
29.1	749.847	29.1	722.14	29.1	270.4	29	-75.8047	29	-83.8742	29.1	-52.7336	29.1	-26.0625	29.1	-13.8625
29.2	750.48	29.2	723.953	29.2	276.055	29.1	-75.6469	29.1	-84.2305	29.2	-53.1148	29.2	-26.3172	29.2	-13.9594
29.3	751.127	29.3	725.623	29.3	281.747	29.2	-75.5226	29.2	-84.5586	29.3	-53.5031	29.3	-26.5156	29.3	-14.0375
29.4	751.738	29.4	727.258	29.4	287.51	29.3	-75.3344	29.3	-84.8797	29.4	-53.8937	29.4	-26.75	29.4	-14.1281
29.5	752.37	29.5	728.91	29.5	293.148	29.4	-75.0906	29.4	-85.1906	29.5	-54.2632	29.5	-26.9266	29.5	-14.2445
29.6	752.952	29.6	730.503	29.6	298.616	29.5	-74.8383	29.5	-85.5187	29.6	-54.6242	29.6	-27.2062	29.6	-14.3555
29.7	753.578	29.7	731.984	29.7	304.191	29.6	-74.5563	29.6	-85.8359	29.7	-54.9672	29.7	-27.3883	29.7	-14.4594
29.8	754.221	29.8	733.508	29.8	309.788	29.7	-74.2547	29.7	-86.125	29.8	-55.3351	29.8	-27.6086	29.8	-14.5523
29.9	754.791	29.9	734.993	29.9	315.303	29.8	-73.9352	29.8	-86.4133	29.9	-55.7125	29.9	-27.7664	29.9	-14.639
30	755.336	30	736.389	30	320.585	29.9	-73.6383	29.9	-86.7023	30	-56.1008	30	-27.9727	30	-14.7188
30.1	755.877	30.1	737.844	30.1	325.891	30	-73.3133	30	-87	30.1	-56.4953	30.1	-28.1992	30.1	-14.7906
30.2	756.423	30.2	739.212	30.2	331.274	30.1	-72.9422	30.1	-87.2523	30.2	-56.8578	30.2	-28.407	30.2	-14.8945
30.3	756.984	30.3	740.578	30.3	336.572	30.2	-72.5313	30.2	-87.507	30.3	-57.225	30.3	-28.6063	30.3	-14.9984
30.4	757.538	30.4	741.902	30.4	341.837	30.3	-72.1336	30.3	-87.757	30.4	-57.6203	30.4	-28.8008	30.4	-15.1
30.5	758.093	30.5	743.251	30.5	347.048	30.4	-71.7383	30.4	-88.0219	30.5	-57.9836	30.5	-29.0164	30.5	-15.1898
30.6	758.644	30.6	744.598	30.6	352.236	30.5	-71.2523	30.5	-88.2687	30.6	-58.3812	30.6	-29.218	30.6	-15.3
30.7	759.207	30.7	745.882	30.7	357.475	30.6	-70.7383	30.6	-88.5016	30.7	-58.7726	30.7	-29.407	30.7	-15.4242
30.8	759.729	30.8	747.227	30.8	362.416	30.7	-70.2406	30.7	-88.7422	30.8	-59.1539	30.8	-29.6289	30.8	-15.5234
30.9	760.281	30.9	748.442	30.9	367.408	30.8	-69.6781	30.8	-89.0101	30.9	-59.5258	30.9	-29.8727	30.9	-15.6351
31	760.836	31	749.637	31	372.331	30.9	-69.0726	30.9	-89.2445	31	-59.9016	31	-30.0938	31	-15.757
31.1	761.362	31.1	750.837	31.1	377.28	31	-68.4469	31	-89.4601	31.1	-60.2719	31.1	-30.3125	31.1	-15.8781
31.2	761.885	31.2	752.016	31.2	382.159	31.1	-67.8234	31.1	-89.6781	31.2	-60.6242	31.2	-30.4922	31.2	-15.9867
31.3	762.415	31.3	753.191	31.3	387	31.2	-67.193	31.2	-89.9367	31.3	-60.9937	31.3	-30.6719	31.3	-16.1039
31.4	762.953	31.4	754.391	31.4	391.62	31.3	-66.5492	31.3	-90.2203	31.4	-61.35	31.4	-30.9031	31.4	-16.1984
31.5	763.468	31.5	755.49	31.5	396.16	31.4	-65.9125	31.4	-90.457	31.5	-61.6945	31.5	-31.0938	31.5	-16.2805
31.6	763.999	31.6	756.575	31.6	400.746	31.5	-65.1672	31.5	-90.6703	31.6	-62.064	31.6	-31.3024	31.6	-16.3703
31.7	764.504	31.7	757.691	31.7	405.328	31.6	-64.2695	31.6	-90.9031	31.7	-62.4203	31.7	-31.5266	31.7	-16.4992
31.8	765.019	31.8	758.75	31.8	409.914	31.7	-63.382	31.7	-91.1429	31.8	-62.7648	31.8	-31.7227	31.8	-16.5961
31.9	765.531	31.9	759.779	31.9	414.493	31.8	-62.4648	31.8	-91.3539	31.9	-63.1281	31.9	-31.9196	31.9	-16.6976
32	766.027	32	760.809	32	418.801	31.9	-61.5414	31.9	-91.5516	32	-63.4781	32	-32.1203	32	-16.8
32.1	766.516	32.1	761.813	32.1	423.271	32	-60.5742	32	-91.7601	32.1	-63.8031	32.1	-32.2977	32.1	-16.8937
32.2	767.015	32.2	762.767	32.2	427.374	32.1	-59.639	32.1	-91.9828	32.2	-64.1312	32.2	-32.4875	32.2	-16.975
32.3	767.536	32.3	763.719	32.3	431.568	32.2	-58.6875	32.2	-92.2375	32.3	-64.4664	32.3	-32.7039	32.3	-17.0695
32.4	768.038	32.4	764.697	32.4	435.782	32.3	-57.6976	32.3	-92.4938	32.4	-64.7992	32.4	-32.9383	32.4	-17.1469
32.5	768.48	32.5	765.622	32.5	439.879	32.4	-56.6735	32.4	-92.6336	32.5	-65.1508	32.5	-33.1445	32.5	-17.2609
32.6	768.898	32.6	766.563	32.6	443.967	32.5	-55.6281	32.5	-92.7383	32.6	-65.4711	32.6	-33.3289	32.6	-17.3586
32.7	769.376	32.7	767.489	32.7	448.002	32.6	-54.5547	32.6	-92.8539	32.7	-65.8156	32.7	-33.5383	32.7	-17.4672
32.8	769.839	32.8	768.455	32.8	451.93	32.7	-53.389	32.7	-93.0406	32.8	-66.1508	32.8	-33.7305	32.8	-17.5258
32.9	770.266	32.9	769.379	32.9	455.817	32.8	-52.2266	32.8	-93.2321	32.9	-66.4859	32.9	-33.9313	32.9	-17.6055
33	770.726	33	770.263	33	459.686	32.9	-50.9727	32.9	-93.3992	33	-66.8156	33	-34.1281	33	-17.6937
33.1	771.191	33.1	771.141	33.1	463.271	33	-49.6594	33	-93.557	33.1	-67.1539	33.1	-34.3055	33.1	-17.8148
33.2	771.638	33.2	771.969	33.2	466.962	33.1	-48.3438	33.1	-93.7344	33.2	-67.507	33.2	-34.5039	33.2	-17.9336
33.3	772.066	33.3	772.802	33.3	470.573	33.2	-46.9797	33.2	-93.8851	33.3	-67.8172	33.3	-34.7078	33.3	-18.0492
33.4	772.527	33.4	773.649	33.4	474.275	33.3	-45.6203	33.3	-94.0672	33.4	-68.093	33.4	-34.9023	33.4	-18.1742
33.5	772.981	33.5	774.517	33.5	477.764	33.4	-44.2172	33.4	-94.2601	33.5	-68.3875	33.5	-35.0906	33.5	-18.2852
33.6	773.43	33.6	775.341	33.6	481.327	33.5	-42.6969	33.5	-94.3984	33.6	-68.6578	33.6	-35.2734	33.6	-18.3843
33.7	773.862	33.7	776.134	33.7	484.745	33.6	-41.1883	33.6	-94.5367	33.7	-68.975	33.7	-35.4727	33.7	-18.4844
33.8	774.367	33.8	776.942	33.8	488.112	33.7	-39.6664	33.7	-94.6914	33.8	-69.2437	33.8	-35.6375	33.8	-18.5961
33.9	774.818	33.9	777.783	33.9	491.452	33.8	-38.1383	33.8	-94.8133	33.9	-69.5578	33.9	-35.8469	33.9	-18.7172
34	775.25	34	778.634	34	494.767	33.9	-36.5836	33.9	-94.9508	34	-69.8914	34	-36.0477	34	-18.8461
34.1	775.652	34.1	779.45	34.1	498.089	34	-34.993	34	-95.0859	34.1	-70.2328	34.1	-36.2734	34.1	-18.9766
34.2	776.071	34.2	780.18	34.2	501.366	34.1	-33.3164	34.1	-95.2477	34.2	-70.5453	34.2	-36.4969	34.2	-19.0836
34.3	776.5	34.3	780.877	34.3	504.37	34.2	-31.5851	34.2	-95.407	34.3	-70.8492	34.3	-36.6867	34.3	-19.1836
34.4	776.93	34.4	781.633	34.4	507.369	34.3	-29.8508	34.3	-95.543	34.4	-71.1711	34.4	-36.8797	34.4	-19.2922
34.5	777.328	34.5	782.33	34.5	510.32	34.4	-28.1047	34.4	-95.6836	34.5	-71.4976	34.5	-37.118	34.5	-19.3656
34.6	777.704	34.6	783.045	34.6	513.276	34.5	-26.3328	34.5	-95.8016	34.6	-71.8297	34.6	-37.3711	34.6	-19.4594
34.7	778.081	34.7	783.763	34.7	516.221	34.6	-24.5281	34.6	-95.9578	34.7	-72.1351	34.7	-37.5867	34.7	-19.5453
34.8	778.469	34.8	784.485	34.8	519.073	34.7	-22.6476	34.7	-96.1031	34.8	-72.4086	34.8	-37.8125	34.8	-19.6398
34.9	778.852	34.9	785.22	34.9	521.988	34.8	-20.8148	34.8	-96.2375	34.9	-72.7078	34.9	-38.007	34.9	-19.7445
35	779.273	35	785.931	35	524.835	34.9	-18.8758	34.9	-96.3875	35	-73.0062	35	-38.2078	35	-19.8508
35.1	779.697	35.1	786.654	35.1	527.644	35	-16.8758	35	-96.5477	35.1	-73.3094	35.1	-38.3906	35.1	-19.9133
35.2	780.102	35.2	787.341	35.2	530.469	35.1	-14.875	35.1	-96.7031	35.2	-73.593	35.2	-38.5984	35.2	-20.0062
35.3	780.488	35.3	788.075	35.3	532.967	35.2	-12.8484	35.2	-96.8602	35.3	-73.8648	35.3	-38.8125	35.3	-20.1398
35.4	780.875	35.4	788.807	35.4	535.605	35.3	-10.7977	35.3	-97.0039	35.4	-74.1609	35.4	-39.0039	35.4	-20.2367
35.5	781.29	35.5	789.404	35.5	538.234	35.4	-8.73828	35.4	-97.1523	35.5	-74.4351	35.5	-39.1641	35.5	-20.3148
35.6	781.731	35.6	790.024	35.6	540.851	35.5	-6.6203	35.5	-97.2977	35.6	-74.7086	35.6	-39.3602	35.6	-20.4375
35.7	782.137	35.7	790.659	35.7	543.409	35.6	-4.44922	35.6	-97.4453	35.7	-74.9867	35.7	-39.5461	35.7	-20.557
35.8	782.535	35.8	791.266	35.8	545.808	35.7	-2.27185	35.7	-97.5836	35.8	-75.2758	35.8	-39.7078	35.8	-20.6906
35.9	782.906	35.9	791.909	35.9	548.184	35.8	-0.0523682	35.8	-97.7219	35.9	-75.5789	35.9	-39.9102	35.9	-20.807
36	783.267	36	792.521	36	550.559	35.9	2.20471	35.9	-97.8359	36	-75.8508	36	-40.1133	36	-20.9164
36.1	783.656	36.1	793.13	36.1	552.961	36	4.46564	36	-97.9141	36.1	-76.1617	36.1	-40.2813	36.1	-21.0383
36.2	784.04	36.2	793.762	36.2	555.34	36.1	6.74139	36.1	-97.9766	36.2	-76.4625	36.2	-40.45	36.2	-21.1711
36.3	784.402	36.3	794.393	36.3	557.676	36.2	9.06091	36.2	-98.1531	36.3	-76.764	36.3	-40.6016	36.3	-21.2679
36.4	784.787	36.4	795.009	36.4	559.969	36.3	11.4641	36.3	-98.3984	36.4	-77.075	36.4	-40.7781	36.4	-21.3625
36.5	785.148	36.5	795.63	36.5	562.027	36.4	13.8516	36.4	-98.5898	36.5	-77.3336	36.5	-40.9609	36.5	-21.4625
36.6	785.469	36.6	796.223	36.6	564.087	36.5	16.3242	36.5	-98.7531	36.6	-77.5984	36.6	-41.1242	36.6	-21.5859
36.7	785.821	36.7	796.818	36.7	566.211	36.6	18.7687	36.6	-98.9266	36.7	-77.8773	36.7	-41.2781	36.7	-21.7054
36.8	786.18	36.8	797.417	36.8	568.316	36.7	21.1961	36.7	-99.0898	36.8	-78.1414	36.8	-41.5281	36.8	-21.8117
36.9	786.552	36.9	798.024	36.9	570.41	36.8	23.6641	36.8	-99.2375	36.9	-78.389	36.9	-41.7773	36.9	-21.9047
37	786.914	37	798.604	37	572.469	36.9	26.15	36.9	-99.3742	37	-78.6414	37	-41.9695	37	-21.9984
37.1	787.27	37.1	799.189	37.1	574.364	37	28.6523	37	-99.5391	37.1	-78.8648	37.1	-42.132	37.1	-22.0695
37.2	787.606	37.2	799.767	37.2	576.289	37.1	31.1969	37.1	-99.6719	37.2	-79.107	37.2	-42.2852	37.2	-22.1586
37.3	787.97	37.3	800.349	37.3	578.223	37.2	33.7875	37.2	-99.7734	37.3	-79.3211	37.3	-42.4695	37.3	-22.2609
37.4	788.321	37.4	800.937	37.4	580.18	37.3	36.4235	37.3	-99.9125	37.4	-79.5726	37.4	-42.6758	37.4	-22.3383
37.5	788.672	37.5	801.478	37.5	581.988	37.4	39.0266	37.4	-100.051	37.5	-79.7977	37.5	-42.8672	37.5	-22.4242
37.6	789.021	37.6	802.029	37.6	583.82	37.5	41.6867	37.5	-100.216	37.6	-80.0047	37.6	-43.0273	37.6	-22.5234
37.7	789.383	37.7	802.576	37.7	585.505	37.6	44.3851	37.6	-100.378	37.7	-80.2234	37.7	-43.1758	37.7	-22.6195
37.8	789.735	37.8	803.143	37.8	587.245	37.7	47.1047	37.7	-100.519	37.8	-80.4664	37.8	-43.3828	37.8	-22.7141
37.9	790.087	37.9	803.685	37.9	588.973	37.8	49.8078	37.8	-100.679	37.9	-80.7086	37.9	-43.6016	37.9	-22.7875
38	790.419	38	804.221	38	590.711	37.9	52.5586	37.9	-100.813	38	-80.9468	38	-43.8094	38	-22.8726
38.1	790.739	38.1	804.741	38.1	592.442	38	55.3172	38	-100.956	38.1	-81.1695	38.1	-44.0305	38.1	-22.9875
38.2	791.079	38.2	805.287	38.2	594.105	38.1	58.082	38.1	-101.094	38.2	-81.418	38.2	-44.2344	38.2	-23.1125
38.3	791.387	38.3	805.821	38.3	595.653	38.2	60.8211	38.2	-101.273	38.3	-81.6382	38.3	-44.4188	38.3	-23.1828
38.4	791.716	38.4	806.33	38.4	597.289	38.3	63.6094	38.3	-101.412	38.4	-81.8882	38.4	-44.6203	38.4	-23.2758
38.5	792.055	38.5	806.858	38.5	598.855	38.4	66.3836	38.4	-101.571	38.5	-82.1141	38.5	-44.8125	38.5	-23.3656
38.6	792.4	38.6	807.409	38.6	600.533	38.5	69.1227	38.5	-101.72	38.6	-82.3211	38.6	-45.0008	38.6	-23.4601
38.7	792.742	38.7	807.901	38.7	602.109	38.6	71.8524	38.6	-101.831	38.7	-82.5438	38.7	-45.1906	38.7	-23.5765
38.8	793.072	38.8	808.391	38.8	603.533	38.7	74.6781	38.7	-101.949	38.8	-82.7593	38.8	-45.368	38.8	-23.6664
38.9	793.394	38.9	808.885	38.9	604.973	38.8	77.5922	38.8	-102.049	38.9	-82.9461	38.9	-45.5625	38.9	-23.8
39	793.716	39	809.401	39	606.412	38.9	80.4703	38.9	-102.168	39	-83.1453	39	-45.7656	39	-23.8734
39.1	794.06	39.1	809.901	39.1	607.868	39	83.4063	39	-102.287	39.1	-83.3492	39.1	-45.9531	39.1	-23.9961
39.2	794.407	39.2	810.396	39.2	609.309	39.1	86.318	39.1	-102.42	39.2	-83.575	39.2	-46.1641	39.2	-24.0883
39.3	794.755	39.3	810.889	39.3	610.754	39.2	89.2461	39.2	-102.515	39.3	-83.7906	39.3	-46.3516	39.3	-24.1633
39.4	795.095	39.4	811.37	39.4	612.231	39.3	92.2133	39.3	-102.605	39.4	-84.0132	39.4	-46.5508	39.4	-24.2632
39.5	795.427	39.5	811.85	39.5	613.649	39.4	95.1172	39.4	-102.721	39.5	-84.2227	39.5	-46.7469	39.5	-24.3742
39.6	795.759	39.6	812.309	39.6	614.927	39.5	98.0375	39.5	-102.816	39.6	-84.4039	39.6	-46.9383	39.6	-24.4523
39.7	796.07	39.7	812.784	39.7	616.169	39.6	100.911	39.6	-102.92	39.7	-84.6328	39.7	-47.1328	39.7	-24.5297
39.8	796.38	39.8	813.283	39.8	617.446	39.7	103.796	39.7	-103.034	39.8	-84.8492	39.8	-47.3242	39.8	-24.5953
39.9	796.703	39.9	813.768	39.9	618.672	39.8	106.716	39.8	-103.166	39.9	-85.0867	39.9	-47.5187	39.9	-24.6633
40	797.002	40	814.237	40	619.895	39.9	109.613	39.9	-103.304	40	-85.3055	40	-47.6836	40	-24.7679
40.1	797.328	40.1	814.701	40.1	621.15	40	112.575	40	-103.409	40.1	-85.5281	40.1	-47.8531	40.1	-24.8461
40.2	797.645	40.2	815.191	40.2	622.388	40.1	115.626	40.1	-103.514	40.2	-85.7352	40.2	-48.0156	40.2	-24.9359
40.3	797.951	40.3	815.659	40.3	623.59	40.2	118.683	40.2	-103.631	40.3	-85.9453	40.3	-48.168	40.3	-25.0305
40.4	798.24	40.4	816.1	40.4	624.771	40.3	121.698	40.3	-103.737	40.4	-86.1422	40.4	-48.3391	40.4	-25.1351
40.5	798.543	40.5	816.545	40.5	625.951	40.4	124.666	40.4	-103.834	40.5	-86.3406	40.5	-48.5234	40.5	-25.2539
40.6	798.845	40.6	816.991	40.6	627.141	40.5	127.641	40.5	-103.944	40.6	-86.5234	40.6	-48.6953	40.6	-25.3578
40.7	799.138	40.7	817.459	40.7	628.298	40.6	130.611	40.6	-104.041	40.7	-86.7125	40.7	-48.8477	40.7	-25.4476
40.8	799.434	40.8	817.892	40.8	629.422	40.7	133.679	40.7	-104.155	40.8	-86.8906	40.8	-48.9992	40.8	-25.5578
40.9	799.755	40.9	818.314	40.9	630.556	40.8	136.756	40.8	-104.233	40.9	-87.064	40.9	-49.1563	40.9	-25.6789
41	800.061	41	818.737	41	631.626	40.9	139.787	40.9	-104.327	41	-87.2508	41	-49.3242	41	-25.7758
41.1	800.384	41.1	819.166	41.1	632.674	41	142.718	41	-104.397	41.1	-87.4336	41.1	-49.5039	41.1	-25.8633
41.2	800.689	41.2	819.577	41.2	633.755	41.1	145.679	41.1	-104.479	41.2	-87.607	41.2	-49.7039	41.2	-25.9547
41.3	800.989	41.3	819.998	41.3	634.817	41.2	148.659	41.2	-104.56	41.3	-87.7726	41.3	-49.8898	41.3	-26.0226
41.4	801.262	41.4	820.421	41.4	635.82	41.3	151.613	41.3	-104.666	41.4	-87.9266	41.4	-50.0828	41.4	-26.0883
41.5	801.544	41.5	820.845	41.5	636.864	41.4	154.584	41.4	-104.764	41.5	-88.0984	41.5	-50.268	41.5	-26.1781
41.6	801.833	41.6	821.248	41.6	637.908	41.5	157.551	41.5	-104.873	41.6	-88.2664	41.6	-50.4305	41.6	-26.2531
41.7	802.119	41.7	821.662	41.7	638.861	41.6	160.527	41.6	-104.967	41.7	-88.45	41.7	-50.6008	41.7	-26.3461
41.8	802.423	41.8	822.062	41.8	639.774	41.7	163.514	41.7	-105.06	41.8	-88.6328	41.8	-50.793	41.8	-26.4554
41.9	802.701	41.9	822.475	41.9	640.712	41.8	166.48	41.8	-105.167	41.9	-88.8062	41.9	-50.9961	41.9	-26.5422
42	802.985	42	822.902	42	641.68	41.9	169.482	41.9	-105.291	42	-88.9797	42	-51.1641	42	-26.6469
42.1	803.259	42.1	823.319	42.1	642.607	42	172.52	42	-105.354	42.1	-89.1297	42.1	-51.3477	42.1	-26.7484
42.2	803.537	42.2	823.729	42.2	643.532	42.1	175.583	42.1	-105.384	42.2	-89.2852	42.2	-51.5	42.2	-26.843
42.3	803.86	42.3	824.142	42.3	644.447	42.2	178.59	42.2	-105.412	42.3	-89.4383	42.3	-51.6594	42.3	-26.9289
42.4	804.185	42.4	824.545	42.4	645.396	42.3	181.634	42.3	-105.432	42.4	-89.6219	42.4	-51.8438	42.4	-27.057
42.5	804.481	42.5	824.952	42.5	646.337	42.4	184.512	42.4	-105.451	42.5	-89.7891	42.5	-52.0203	42.5	-27.1859
42.6	804.79	42.6	825.349	42.6	647.255	42.5	187.462	42.5	-105.48	42.6	-89.9492	42.6	-52.1836	42.6	-27.2883
42.7	805.081	42.7	825.764	42.7	648.185	42.6	190.38	42.6	-105.498	42.7	-90.1187	42.7	-52.3555	42.7	-27.3969
42.8	805.388	42.8	826.174	42.8	649.059	42.7	193.266	42.7	-105.541	42.8	-90.2687	42.8	-52.5352	42.8	-27.4992
42.9	805.688	42.9	826.558	42.9	649.947	42.8	196.178	42.8	-105.58	42.9	-90.3859	42.9	-52.707	42.9	-27.5961
43	805.985	43	826.951	43	650.834	42.9	199.11	42.9	-105.603	43	-90.5516	43	-52.8898	43	-27.7023
43.1	806.259	43.1	827.323	43.1	651.68	43	201.997	43	-105.634	43.1	-90.7078	43.1	-53.0742	43.1	-27.807
43.2	806.539	43.2	827.698	43.2	652.451	43.1	204.892	43.1	-105.662	43.2	-90.8351	43.2	-53.2391	43.2	-27.9211
43.3	806.822	43.3	828.088	43.3	653.275	43.2	207.723	43.2	-105.684	43.3	-90.993	43.3	-53.4063	43.3	-28.0148
43.4	807.091	43.4	828.455	43.4	654.064	43.3	210.615	43.3	-105.693	43.4	-91.1406	43.4	-53.5781	43.4	-28.1195
43.5	807.352	43.5	828.83	43.5	654.857	43.4	213.432	43.4	-105.716	43.5	-91.3008	43.5	-53.7297	43.5	-28.2414
43.6	807.638	43.6	829.198	43.6	655.666	43.5	216.27	43.5	-105.7	43.6	-91.4539	43.6	-53.8945	43.6	-28.3304
43.7	807.895	43.7	829.581	43.7	656.442	43.6	219.076	43.6	-105.712	43.7	-91.6133	43.7	-54.0508	43.7	-28.4312
43.8	808.161	43.8	829.951	43.8	657.205	43.7	221.873	43.7	-105.688	43.8	-91.7344	43.8	-54.1828	43.8	-28.5469
43.9	808.432	43.9	830.334	43.9	658.009	43.8	224.666	43.8	-105.669	43.9	-91.8937	43.9	-54.3281	43.9	-28.6304
44	808.704	44	830.71	44	658.799	43.9	227.49	43.9	-105.661	44	-92.0703	44	-54.4641	44	-28.7461
44.1	808.954	44.1	831.109	44.1	659.544	44	230.307	44	-105.653	44.1	-92.2266	44.1	-54.6055	44.1	-28.8383
44.2	809.216	44.2	831.498	44.2	660.282	44.1	233.088	44.1	-105.625	44.2	-92.3906	44.2	-54.7609	44.2	-28.9234
44.3	809.45	44.3	831.87	44.3	661.002	44.2	235.82	44.2	-105.607	44.3	-92.5438	44.3	-54.9109	44.3	-29.0383
44.4	809.724	44.4	832.23	44.4	661.728	44.3	238.672	44.3	-105.583	44.4	-92.6867	44.4	-55.0812	44.4	-29.1711
44.5	810.002	44.5	832.591	44.5	662.45	44.4	241.491	44.4	-105.52	44.5	-92.8125	44.5	-55.2625	44.5	-29.2726
44.6	810.269	44.6	832.936	44.6	663.166	44.5	244.287	44.5	-105.461	44.6	-92.9383	44.6	-55.4055	44.6	-29.3617
44.7	810.544	44.7	833.288	44.7	663.845	44.6	247.023	44.6	-105.407	44.7	-93.0578	44.7	-55.5781	44.7	-29.4625
44.8	810.818	44.8	833.627	44.8	664.559	44.7	249.766	44.7	-105.328	44.8	-93.1758	44.8	-55.7414	44.8	-29.5617
44.9	811.095	44.9	833.955	44.9	665.248	44.8	252.448	44.8	-105.266	44.9	-93.3078	44.9	-55.9453	44.9	-29.6469
45	811.369	45	834.315	45	665.904	44.9	255.152	44.9	-105.211	45	-93.4383	45	-56.125	45	-29.7453
45.1	811.641	45.1	834.666	45.1	666.572	45	257.835	45	-105.13	45.1	-93.5383	45.1	-56.3242	45.1	-29.8383
45.2	811.911	45.2	835.011	45.2	667.259	45.1	260.472	45.1	-105.051	45.2	-93.6516	45.2	-56.5156	45.2	-29.9554
45.3	812.19	45.3	835.33	45.3	667.916	45.2	263.116	45.2	-104.965	45.3	-93.7609	45.3	-56.6953	45.3	-30.0734
45.4	812.474	45.4	835.671	45.4	668.591	45.3	265.671	45.3	-104.86	45.4	-93.8719	45.4	-56.8477	45.4	-30.1437
45.5	812.755	45.5	835.995	45.5	669.259	45.4	268.254	45.4	-104.781	45.5	-93.975	45.5	-57.0031	45.5	-30.2484
45.6	813.009	45.6	836.339	45.6	669.921	45.5	270.87	45.5	-104.715	45.6	-94.1133	45.6	-57.1445	45.6	-30.3656
45.7	813.264	45.7	836.72	45.7	670.54	45.6	273.455	45.6	-104.597	45.7	-94.2117	45.7	-57.3211	45.7	-30.4836
45.8	813.5	45.8	837.023	45.8	671.193	45.7	275.984	45.7	-104.425	45.8	-94.3234	45.8	-57.4719	45.8	-30.6117
45.9	813.752	45.9	837.298	45.9	671.841	45.8	278.539	45.8	-104.292	45.9	-94.4289	45.9	-57.6633	45.9	-30.7336
46	813.996	46	837.623	46	672.482	45.9	281.171	45.9	-104.173	46	-94.5391	46	-57.8328	46	-30.7984
46.1	814.255	46.1	837.89	46.1	673.069	46	283.719	46	-104.015	46.1	-94.632	46.1	-57.9914	46.1	-30.8547
46.2	814.505	46.2	838.233	46.2	673.685	46.1	286.243	46.1	-103.855	46.2	-94.7219	46.2	-58.1789	46.2	-30.9125
46.3	814.748	46.3	838.635	46.3	674.251	46.2	288.726	46.2	-103.711	46.3	-94.8312	46.3	-58.375	46.3	-30.9984
46.4	814.978	46.4	838.944	46.4	674.85	46.3	291.227	46.3	-103.546	46.4	-94.9375	46.4	-58.5352	46.4	-31.0883
46.5	815.216	46.5	839.3	46.5	675.43	46.4	293.684	46.4	-103.387	46.5	-95.0617	46.5	-58.7039	46.5	-31.1937
46.6	815.45	46.6	839.616	46.6	676.018	46.5	296.18	46.5	-103.249	46.6	-95.175	46.6	-58.882	46.6	-31.2961
46.7	815.697	46.7	839.941	46.7	676.579	46.6	298.637	46.6	-103.049	46.7	-95.2578	46.7	-59.05	46.7	-31.3812
46.8	815.955	46.8	840.291	46.8	677.127	46.7	301.07	46.7	-102.82	46.8	-95.343	46.8	-59.2266	46.8	-31.4719
46.9	816.197	46.9	840.609	46.9	677.673	46.8	303.489	46.8	-102.643	46.9	-95.4492	46.9	-59.3719	46.9	-31.5718
47	816.43	47	840.924	47	678.232	46.9	305.844	46.9	-102.46	47	-95.5461	47	-59.5102	47	-31.675
47.1	816.685	47.1	841.225	47.1	678.798	47	308.145	47	-102.261	47.1	-95.639	47.1	-59.6516	47.1	-31.7726
47.2	816.923	47.2	841.542	47.2	679.353	47.1	310.477	47.1	-102.05	47.2	-95.7461	47.2	-59.7742	47.2	-31.8734
47.3	817.177	47.3	841.842	47.3	679.909	47.2	312.817	47.2	-101.858	47.3	-95.8578	47.3	-59.925	47.3	-31.9547
47.4	817.43	47.4	842.143	47.4	680.482	47.3	315.156	47.3	-101.648	47.4	-95.9305	47.4	-60.0508	47.4	-32.0258
47.5	817.705	47.5	842.424	47.5	681.021	47.4	317.453	47.4	-101.463	47.5	-96.0031	47.5	-60.1945	47.5	-32.132
47.6	817.95	47.6	842.706	47.6	681.56	47.5	319.81	47.5	-101.191	47.6	-96.0851	47.6	-60.3312	47.6	-32.2289
47.7	818.193	47.7	843.022	47.7	682.119	47.6	322.172	47.6	-100.869	47.7	-96.1469	47.7	-60.4688	47.7	-32.2961
47.8	818.44	47.8	843.339	47.8	682.652	47.7	324.359	47.7	-100.58	47.8	-96.2414	47.8	-60.6211	47.8	-32.3414
47.9	818.661	47.9	843.64	47.9	683.188	47.8	326.575	47.8	-100.316	47.9	-96.3477	47.9	-60.7453	47.9	-32.4211
48	818.901	48	843.927	48	683.698	47.9	328.723	47.9	-100.048	48	-96.4289	48	-60.8937	48	-32.5101
48.1	819.161	48.1	844.233	48.1	684.216	48	330.907	48	-99.7719	48.1	-96.4953	48.1	-61.0469	48.1	-32.5687
48.2	819.396	48.2	844.538	48.2	684.722	48.1	333.08	48.1	-99.4899	48.2	-96.5687	48.2	-61.2023	48.2	-32.6273
48.3	819.591	48.3	844.842	48.3	685.232	48.2	335.25	48.2	-99.1625	48.3	-96.6406	48.3	-61.3524	48.3	-32.707
48.4	819.834	48.4	845.152	48.4	685.735	48.3	337.403	48.3	-98.861	48.4	-96.7094	48.4	-61.5031	48.4	-32.7984
48.5	820.056	48.5	845.483	48.5	686.232	48.4	339.591	48.4	-98.55	48.5	-96.8008	48.5	-61.6719	48.5	-32.85
48.6	820.236	48.6	845.811	48.6	686.737	48.5	341.748	48.5	-98.2664	48.6	-96.8617	48.6	-61.8039	48.6	-32.9055
48.7	820.442	48.7	846.128	48.7	687.24	48.6	343.777	48.6	-97.9508	48.7	-96.925	48.7	-61.9641	48.7	-32.9937
48.8	820.646	48.8	846.412	48.8	687.717	48.7	345.775	48.7	-97.6156	48.8	-97.007	48.8	-62.1047	48.8	-33.0648
48.9	820.877	48.9	846.695	48.9	688.22	48.8	347.838	48.8	-97.2828	48.9	-97.0656	48.9	-62.2656	48.9	-33.1633
49	821.134	49	846.988	49	688.725	48.9	349.86	48.9	-96.9274	49	-97.139	49	-62.457	49	-33.2453
49.1	821.349	49.1	847.284	49.1	689.24	49	351.884	49	-96.5446	49.1	-97.2266	49.1	-62.6047	49.1	-33.3257
49.2	821.544	49.2	847.558	49.2	689.717	49.1	353.93	49.1	-96.2313	49.2	-97.3078	49.2	-62.7352	49.2	-33.4164
49.3	821.736	49.3	847.847	49.3	690.22	49.2	355.923	49.2	-95.8649	49.3	-97.389	49.3	-62.8859	49.3	-33.5148
49.4	821.942	49.4	848.116	49.4	690.669	49.3	357.974	49.3	-95.5016	49.4	-97.4805	49.4	-63.0266	49.4	-33.6078
49.5	822.13	49.5	848.39	49.5	691.127	49.4	359.997	49.4	-95.1063	49.5	-97.5969	49.5	-63.1711	49.5	-33.6703
49.6	822.326	49.6	848.677	49.6	691.592	49.5	361.974	49.5	-94.7234	49.6	-97.6898	49.6	-63.3477	49.6	-33.7484
49.7	822.569	49.7	848.98	49.7	692.041	49.6	363.943	49.6	-94.325	49.7	-97.7883	49.7	-63.5	49.7	-33.8625
49.8	822.802	49.8	849.272	49.8	692.506	49.7	365.919	49.7	-93.9117	49.8	-97.8664	49.8	-63.6164	49.8	-33.9547
49.9	823.03	49.9	849.554	49.9	692.951	49.8	367.861	49.8	-93.5242	49.9	-97.9711	49.9	-63.7539	49.9	-34.0734
50	823.251	50	849.859	50	693.412	49.9	369.802	49.9	-93.1031	50	-98.082	50	-63.8297	50	-34.1586
50.1	823.454	50.1	850.143	50.1	693.846	50	371.724	50	-92.6836	50.1	-98.1742	50.1	-63.9375	50.1	-34.2531
50.2	823.666	50.2	850.445	50.2	694.291	50.1	373.605	50.1	-92.2344	50.2	-98.2687	50.2	-64.0703	50.2	-34.35
50.3	823.904	50.3	850.745	50.3	694.728	50.2	375.4	50.2	-91.8024	50.3	-98.3539	50.3	-64.2336	50.3	-34.4281
50.4	824.139	50.4	851.038	50.4	695.179	50.3	377.17	50.3	-91.3797	50.4	-98.4414	50.4	-64.3391	50.4	-34.5101
50.5	824.419	50.5	851.345	50.5	695.611	50.4	379.006	50.4	-90.9297	50.5	-98.5484	50.5	-64.4445	50.5	-34.5961
50.6	824.654	50.6	851.621	50.6	696.041	50.5	380.814	50.5	-90.4266	50.6	-98.6133	50.6	-64.593	50.6	-34.7023
50.7	824.909	50.7	851.893	50.7	696.463	50.6	382.588	50.6	-89.9055	50.7	-98.682	50.7	-64.7188	50.7	-34.8117
50.8	825.166	50.8	852.167	50.8	696.88	50.7	384.434	50.7	-89.4023	50.8	-98.7914	50.8	-64.8672	50.8	-34.9117
50.9	825.407	50.9	852.437	50.9	697.303	50.8	386.385	50.8	-88.8758	50.9	-98.8859	50.9	-65.0391	50.9	-35.0078
51	825.623	51	852.721	51	697.728	50.9	387.959	50.9	-88.3344	51	-98.9797	51	-65.1703	51	-35.0757
51.1	825.861	51.1	852.983	51.1	698.131	51	389.58	51	-87.8086	51.1	-99.0609	51.1	-65.3211	51.1	-35.1711
51.2	826.099	51.2	853.226	51.2	698.529	51.1	391.308	51.1	-87.2781	51.2	-99.1672	51.2	-65.468	51.2	-35.2601
51.3	826.346	51.3	853.491	51.3	698.924	51.2	393.009	51.2	-86.7344	51.3	-99.2328	51.3	-65.6242	51.3	-35.3625
51.4	826.564	51.4	853.754	51.4	699.334	51.3	394.74	51.3	-86.1906	51.4	-99.3047	51.4	-65.7742	51.4	-35.4507
51.5	826.783	51.5	854.017	51.5	699.737	51.4	396.454	51.4	-85.6398	51.5	-99.3851	51.5	-65.9477	51.5	-35.5617
51.6	826.991	51.6	854.265	51.6	700.13	51.5	398.182	51.5	-85.0773	51.6	-99.482	51.6	-66.1094	51.6	-35.6781
51.7	827.208	51.7	854.515	51.7	700.529	51.6	399.904	51.6	-84.5156	51.7	-99.5578	51.7	-66.2258	51.7	-35.7648
51.8	827.404	51.8	854.777	51.8	700.924	51.7	401.483	51.7	-83.9922	51.8	-99.6351	51.8	-66.3664	51.8	-35.8422
51.9	827.603	51.9	855.014	51.9	701.315	51.8	403.068	51.8	-83.4289	51.9	-99.6937	51.9	-66.507	51.9	-35.9117
52	827.831	52	855.265	52	701.662	51.9	404.643	51.9	-82.7828	52	-99.7539	52	-66.6328	52	-35.9883
52.1	828.044	52.1	855.51	52.1	702.045	52	406.216	52	-82.1164	52.1	-99.8344	52.1	-66.7641	52.1	-36.0883
52.2	828.251	52.2	855.77	52.2	702.439	52.1	407.767	52.1	-81.4641	52.2	-99.9281	52.2	-66.8906	52.2	-36.1625
52.3	828.459	52.3	856.034	52.3	702.862	52.2	409.276	52.2	-80.8024	52.3	-100.002	52.3	-67.0219	52.3	-36.2367
52.4	828.641	52.4	856.272	52.4	703.236	52.3	410.806	52.3	-80.1633	52.4	-100.07	52.4	-67.1445	52.4	-36.3109
52.5	828.848	52.5	856.51	52.5	703.623	52.4	412.295	52.4	-79.5094	52.5	-100.14	52.5	-67.2446	52.5	-36.389
52.6	829.057	52.6	856.77	52.6	704.019	52.5	413.791	52.5	-78.8586	52.6	-100.217	52.6	-67.3703	52.6	-36.4633
52.7	829.259	52.7	857.022	52.7	704.38	52.6	415.287	52.6	-78.2133	52.7	-100.291	52.7	-67.5078	52.7	-36.5031
52.8	829.467	52.8	857.289	52.8	704.764	52.7	416.792	52.7	-77.557	52.8	-100.378	52.8	-67.6406	52.8	-36.6148
52.9	829.677	52.9	857.537	52.9	705.153	52.8	418.279	52.8	-76.8773	52.9	-100.472	52.9	-67.7648	52.9	-36.6898
53	829.889	53	857.777	53	705.538	52.9	419.78	52.9	-76.1828	53	-100.509	53	-67.8781	53	-36.7766
53.1	830.095	53.1	858.037	53.1	705.937	53	421.26	53	-75.4977	53.1	-100.581	53.1	-68	53.1	-36.85
53.2	830.283	53.2	858.285	53.2	706.334	53.1	422.716	53.1	-74.8117	53.2	-100.63	53.2	-68.1406	53.2	-36.9203
53.3	830.502	53.3	858.533	53.3	706.689	53.2	424.143	53.2	-74.1188	53.3	-100.715	53.3	-68.2797	53.3	-37.0054
53.4	830.724	53.4	858.784	53.4	707.053	53.3	425.572	53.3	-73.4008	53.4	-100.776	53.4	-68.3711	53.4	-37.0883
53.5	830.936	53.5	859.027	53.5	707.408	53.4	426.971	53.4	-72.6891	53.5	-100.819	53.5	-68.4484	53.5	-37.175
53.6	831.157	53.6	859.23	53.6	707.764	53.5	428.35	53.5	-71.9586	53.6	-100.998	53.6	-68.5734	53.6	-37.2406
53.7	831.366	53.7	859.459	53.7	708.116	53.6	429.685	53.6	-71.2078	53.7	-101.088	53.7	-68.7062	53.7	-37.35
53.8	831.588	53.8	859.687	53.8	708.463	53.7	431.034	53.7	-70.4352	53.8	-101.225	53.8	-68.8234	53.8	-37.389
53.9	831.817	53.9	859.912	53.9	708.806	53.8	432.396	53.8	-69.6344	53.9	-101.202	53.9	-68.9562	53.9	-37.4664
54	832.025	54	860.129	54	709.155	53.9	433.685	53.9	-68.8258	54	-101.341	54	-69.082	54	-37.5539
54.1	832.2	54.1	860.359	54.1	709.498	54	434.976	54	-68.0516	54.1	-101.394	54.1	-69.218	54.1	-37.6508
54.2	832.389	54.2	860.568	54.2	709.85	54.1	436.248	54.1	-67.2508	54.2	-101.462	54.2	-69.3227	54.2	-37.7211
54.3	832.579	54.3	860.77	54.3	710.174	54.2	437.518	54.2	-66.4695	54.3	-101.537	54.3	-69.4297	54.3	-37.8187
54.4	832.788	54.4	860.971	54.4	710.505	54.3	438.795	54.3	-65.6703	54.4	-101.627	54.4	-69.5461	54.4	-37.9203
54.5	832.989	54.5	861.187	54.5	710.811	54.4	440.061	54.4	-64.8719	54.5	-101.702	54.5	-69.6867	54.5	-37.9906
54.6	833.205	54.6	861.425	54.6	711.136	54.5	441.346	54.5	-64.0633	54.6	-101.791	54.6	-69.8047	54.6	-38.0765
54.7	833.384	54.7	861.682	54.7	711.478	54.6	442.627	54.6	-63.2266	54.7	-101.885	54.7	-69.9243	54.7	-38.168
54.8	833.595	54.8	861.917	54.8	711.799	54.7	443.863	54.7	-62.4196	54.8	-101.96	54.8	-70.05	54.8	-38.275
54.9	833.783	54.9	862.136	54.9	712.12	54.8	445.072	54.8	-61.5906	54.9	-102.049	54.9	-70.1594	54.9	-38.3742
55	833.982	55	862.35	55	712.439	54.9	446.315	54.9	-60.7859	55	-102.127	55	-70.2852	55	-38.4398
55.1	834.186	55.1	862.605	55.1	712.76	55	447.573	55	-59.918	55.1	-102.209	55.1	-70.393	55.1	-38.5132
55.2	834.431	55.2	862.828	55.2	713.089	55.1	448.8	55.1	-59.0273	55.2	-102.312	55.2	-70.507	55.2	-38.5883
55.3	834.642	55.3	863.069	55.3	713.4	55.2	450.031	55.2	-58.125	55.3	-102.416	55.3	-70.6281	55.3	-38.6828
55.4	834.877	55.4	863.309	55.4	713.716	55.3	451.224	55.3	-57.2234	55.4	-102.487	55.4	-70.7297	55.4	-38.7726
55.5	835.071	55.5	863.549	55.5	714.034	55.4	452.382	55.4	-56.2922	55.5	-102.544	55.5	-70.8586	55.5	-38.8578
55.6	835.271	55.6	863.781	55.6	714.35	55.5	453.509	55.5	-55.3672	55.6	-102.624	55.6	-70.9727	55.6	-38.9429
55.7	835.462	55.7	864.017	55.7	714.698	55.6	454.663	55.6	-54.4617	55.7	-102.685	55.7	-71.0797	55.7	-39.0031
55.8	835.666	55.8	864.223	55.8	715.017	55.7	455.768	55.7	-53.5461	55.8	-102.784	55.8	-71.1789	55.8	-39.0726
55.9	835.856	55.9	864.445	55.9	715.354	55.8	456.865	55.8	-52.6016	55.9	-102.884	55.9	-71.2859	55.9	-39.1312
56	836.065	56	864.666	56	715.685	55.9	457.96	55.9	-51.6445	56	-102.967	56	-71.4196	56	-39.1976
56.1	836.248	56.1	864.874	56.1	716.01	56	459.052	56	-50.6797	56.1	-103.057	56.1	-71.5117	56.1	-39.2961
56.2	836.435	56.2	865.051	56.2	716.311	56.1	460.156	56.1	-49.7523	56.2	-103.147	56.2	-71.6398	56.2	-39.35
56.3	836.61	56.3	865.248	56.3	716.584	56.2	461.24	56.2	-48.8156	56.3	-103.241	56.3	-71.7492	56.3	-39.432
56.4	836.788	56.4	865.445	56.4	716.898	56.3	462.334	56.3	-47.8789	56.4	-103.322	56.4	-71.8664	56.4	-39.5023
56.5	836.955	56.5	865.644	56.5	717.213	56.4	463.432	56.4	-46.9102	56.5	-103.433	56.5	-71.9953	56.5	-39.5562
56.6	837.165	56.6	865.866	56.6	717.529	56.5	464.516	56.5	-45.9289	56.6	-103.525	56.6	-72.1328	56.6	-39.6078
56.7	837.346	56.7	866.058	56.7	717.845	56.6	465.588	56.6	-44.9398	56.7	-103.62	56.7	-72.2368	56.7	-39.6945
56.8	837.541	56.8	866.272	56.8	718.144	56.7	466.676	56.7	-43.9133	56.8	-103.702	56.8	-72.3344	56.8	-39.775
56.9	837.737	56.9	866.503	56.9	718.448	56.8	467.681	56.8	-42.9008	56.9	-103.775	56.9	-72.4414	56.9	-39.85
57	837.904	57	866.734	57	718.788	56.9	468.64	56.9	-41.8734	57	-103.858	57	-72.5422	57	-39.9172
57.1	838.103	57.1	866.945	57.1	719.12	57	469.608	57	-40.8578	57.1	-103.959	57.1	-72.643	57.1	-39.9789
57.2	838.314	57.2	867.175	57.2	719.44	57.1	470.589	57.1	-39.8273	57.2	-104.061	57.2	-72.7539	57.2	-40.0523
57.3	838.494	57.3	867.406	57.3	719.741	57.2	471.565	57.2	-38.7953	57.3	-104.131	57.3	-72.8735	57.3	-40.1312
57.4	838.681	57.4	867.659	57.4	720.046	57.3	472.541	57.3	-37.7375	57.4	-104.228	57.4	-72.9875	57.4	-40.1945
57.5	838.885	57.5	867.882	57.5	720.337	57.4	473.491	57.4	-36.6937	57.5	-104.291	57.5	-73.0891	57.5	-40.2554
57.6	839.098	57.6	868.113	57.6	720.62	57.5	474.416	57.5	-35.6351	57.6	-104.373	57.6	-73.1711	57.6	-40.3304
57.7	839.279	57.7	868.328	57.7	720.905	57.6	475.358	57.6	-34.5765	57.7	-104.466	57.7	-73.2563	57.7	-40.4133
57.8	839.483	57.8	868.541	57.8	721.221	57.7	476.276	57.7	-33.5359	57.8	-104.541	57.8	-73.3391	57.8	-40.4906
57.9	839.673	57.9	868.738	57.9	721.513	57.8	477.222	57.8	-32.4875	57.9	-104.639	57.9	-73.4243	57.9	-40.5718
58	839.853	58	868.956	58	721.788	57.9	478.12	57.9	-31.4164	58	-104.736	58	-73.5039	58	-40.6469
58.1	840.049	58.1	869.175	58.1	722.061	58	479.026	58	-30.361	58.1	-104.823	58.1	-73.6157	58.1	-40.7305
58.2	840.227	58.2	869.389	58.2	722.346	58.1	479.866	58.1	-29.3109	58.2	-104.893	58.2	-73.7148	58.2	-40.8375
58.3	840.419	58.3	869.671	58.3	722.631	58.2	480.745	58.2	-28.2516	58.3	-104.966	58.3	-73.7758	58.3	-40.9039
58.4	840.623	58.4	869.91	58.4	722.932	58.3	481.62	58.3	-27.1539	58.4	-105.041	58.4	-73.8539	58.4	-41.0031
58.5	840.822	58.5	870.131	58.5	723.216	58.4	482.495	58.4	-26.0609	58.5	-105.123	58.5	-73.9258	58.5	-41.0883
58.6	840.99	58.6	870.338	58.6	723.495	58.5	483.354	58.5	-24.9656	58.6	-105.209	58.6	-73.9985	58.6	-41.1945
58.7	841.162	58.7	870.59	58.7	723.787	58.6	484.23	58.6	-23.8453	58.7	-105.275	58.7	-74.1039	58.7	-41.2828
58.8	841.327	58.8	870.835	58.8	724.061	58.7	485.088	58.7	-22.7203	58.8	-105.35	58.8	-74.2062	58.8	-41.3578
58.9	841.497	58.9	871.057	58.9	724.316	58.8	485.937	58.8	-21.5719	58.9	-105.435	58.9	-74.3047	58.9	-41.4367
59	841.666	59	871.23	59	724.584	58.9	486.777	58.9	-20.407	59	-105.522	59	-74.4094	59	-41.5101
59.1	841.841	59.1	871.395	59.1	724.862	59	487.604	59	-19.2711	59.1	-105.587	59.1	-74.5141	59.1	-41.6
59.2	842.014	59.2	871.598	59.2	725.12	59.1	488.437	59.1	-18.1258	59.2	-105.662	59.2	-74.5938	59.2	-41.6898
59.3	842.201	59.3	871.808	59.3	725.374	59.2	489.284	59.2	-16.9547	59.3	-105.733	59.3	-74.6813	59.3	-41.7648
59.4	842.35	59.4	872.03	59.4	725.635	59.3	490.089	59.3	-15.8024	59.4	-105.806	59.4	-74.7805	59.4	-41.8648
59.5	842.521	59.5	872.268	59.5	725.877	59.4	490.89	59.4	-14.657	59.5	-105.888	59.5	-74.8586	59.5	-41.9476
59.6	842.696	59.6	872.501	59.6	726.136	59.5	491.706	59.5	-13.493	59.6	-105.963	59.6	-74.9555	59.6	-42.0461
59.7	842.877	59.7	872.721	59.7	726.404	59.6	492.514	59.6	-12.3008	59.7	-106.022	59.7	-75.0672	59.7	-42.1195
59.8	843.044	59.8	872.938	59.8	726.675	59.7	493.3	59.7	-11.118	59.8	-106.119	59.8	-75.1696	59.8	-42.1898
59.9	843.209	59.9	873.205	59.9	726.959	59.8	494.088	59.8	-9.93439	59.9	-106.189	59.9	-75.2492	59.9	-42.2836
60	843.373	60	873.43	60	727.224	59.9	494.874	59.9	-8.73596	60	-106.267	60	-75.3164	60	-42.3617
60.1	843.521	60.1	873.597	60.1	727.507	60	495.652	60	-7.55469	60.1	-106.354	60.1	-75.3922	60.1	-42.4398
60.2	843.681	60.2	873.767	60.2	727.772	60.1	496.447	60.1	-6.32031	60.2	-106.444	60.2	-75.468	60.2	-42.5219
60.3	843.861	60.3	873.952	60.3	728.053	60.2	497.214	60.2	-5.11798	60.3	-106.529	60.3	-75.5469	60.3	-42.6039
60.4	844.013	60.4	874.141	60.4	728.314	60.3	498.003	60.3	-3.90234	60.4	-106.592	60.4	-75.6352	60.4	-42.6625
60.5	844.166	60.5	874.307	60.5	728.566	60.4	498.796	60.4	-2.69611	60.5	-106.689	60.5	-75.718	60.5	-42.7242
60.6	844.314	60.6	874.496	60.6	728.831	60.5	499.538	60.5	-1.49609	60.6	-106.784	60.6	-75.8117	60.6	-42.85
60.7	844.474	60.7	874.709	60.7	729.1	60.6	500.264	60.6	-0.213257	60.7	-106.864	60.7	-75.8969	60.7	-42.9515
60.8	844.635	60.8	874.887	60.8	729.337	60.7	501.015	60.7	1.07422	60.8	-106.947	60.8	-75.9555	60.8	-43.0179
60.9	844.81	60.9	875.073	60.9	729.585	60.8	501.765	60.8	2.33594	60.9	-107.022	60.9	-76.0383	60.9	-43.1
61	844.977	61	875.245	61	729.826	60.9	502.476	60.9	3.58203	61	-107.08	61	-76.1157	61	-43.1976
61.1	845.123	61.1	875.425	61.1	730.066	61	503.19	61	4.86017	61.1	-107.174	61.1	-76.218	61.1	-43.2719
61.2	845.318	61.2	875.616	61.2	730.294	61.1	503.886	61.1	6.11639	61.2	-107.243	61.2	-76.3242	61.2	-43.3109
61.3	845.502	61.3	875.804	61.3	730.519	61.2	504.566	61.2	7.38831	61.3	-107.303	61.3	-76.4211	61.3	-43.3859
61.4	845.678	61.4	875.987	61.4	730.729	61.3	505.277	61.3	8.67188	61.4	-107.385	61.4	-76.525	61.4	-43.4515
61.5	845.841	61.5	876.195	61.5	730.979	61.4	505.952	61.4	9.92578	61.5	-107.505	61.5	-76.6203	61.5	-43.4859
61.6	846.002	61.6	876.406	61.6	731.253	61.5	506.641	61.5	11.157	61.6	-107.591	61.6	-76.725	61.6	-43.5297
61.7	846.181	61.7	876.58	61.7	731.502	61.6	507.323	61.6	12.4492	61.7	-107.666	61.7	-76.8047	61.7	-43.5851
61.8	846.334	61.8	876.75	61.8	731.755	61.7	507.988	61.7	13.7477	61.8	-107.76	61.8	-76.8969	61.8	-43.6531
61.9	846.482	61.9	876.925	61.9	732.018	61.8	508.635	61.8	15.0391	61.9	-107.842	61.9	-76.9868	61.9	-43.7094
62	846.645	62	877.073	62	732.28	61.9	509.269	61.9	16.3524	62	-107.939	62	-77.0695	62	-43.7601
62.1	846.788	62.1	877.28	62.1	732.534	62	509.932	62	17.6578	62.1	-108.053	62.1	-77.1633	62.1	-43.8226
62.2	846.977	62.2	877.484	62.2	732.794	62.1	510.59	62.1	18.918	62.2	-108.138	62.2	-77.2641	62.2	-43.8773
62.3	847.107	62.3	877.663	62.3	733.034	62.2	511.241	62.2	20.1969	62.3	-108.248	62.3	-77.382	62.3	-43.9367
62.4	847.28	62.4	877.852	62.4	733.283	62.3	511.906	62.3	21.4969	62.4	-108.354	62.4	-77.4672	62.4	-44.0054
62.5	847.455	62.5	878.022	62.5	733.554	62.4	512.519	62.4	22.8141	62.5	-108.415	62.5	-77.5742	62.5	-44.0687
62.6	847.603	62.6	878.187	62.6	733.827	62.5	513.143	62.5	24.1492	62.6	-108.475	62.6	-77.6586	62.6	-44.1555
62.7	847.794	62.7	878.386	62.7	734.052	62.6	513.745	62.6	25.4969	62.7	-108.56	62.7	-77.725	62.7	-44.2523
62.8	847.995	62.8	878.573	62.8	734.309	62.7	514.389	62.7	26.8219	62.8	-108.643	62.8	-77.8391	62.8	-44.3453
62.9	848.181	62.9	878.773	62.9	734.556	62.8	515	62.8	28.1539	62.9	-108.74	62.9	-77.9406	62.9	-44.4133
63	848.366	63	878.984	63	734.777	62.9	515.616	62.9	29.4656	63	-108.825	63	-78.018	63	-44.4711
63.1	848.38	63.1	879.171	63.1	735.005	63	516.252	63	30.8102	63.1	-108.901	63.1	-78.093	63.1	-44.5562
63.2	848.557	63.2	879.374	63.2	735.245	63.1	516.847	63.1	32.111	63.2	-108.998	63.2	-78.1594	63.2	-44.6164
63.3	848.696	63.3	879.546	63.3	735.484	63.2	517.429	63.2	33.4547	63.3	-109.07	63.3	-78.2453	63.3	-44.6851
63.4	848.904	63.4	879.709	63.4	735.709	63.3	518.006	63.3	34.8304	63.4	-109.138	63.4	-78.2914	63.4	-44.7453
63.5	849.091	63.5	879.895	63.5	735.959	63.4	518.577	63.4	36.2047	63.5	-109.205	63.5	-78.3414	63.5	-44.8226
63.6	849.213	63.6	880.105	63.6	736.198	63.5	519.17	63.5	37.5726	63.6	-109.306	63.6	-78.3984	63.6	-44.8929
63.7	849.377	63.7	880.292	63.7	736.409	63.6	519.738	63.6	38.9227	63.7	-109.412	63.7	-78.4985	63.7	-44.9547
63.8	849.552	63.8	880.472	63.8	736.632	63.7	520.26	63.7	40.2555	63.8	-109.514	63.8	-78.5883	63.8	-44.9992
63.9	849.706	63.9	880.675	63.9	736.85	63.8	520.82	63.8	41.6	63.9	-109.606	63.9	-78.6664	63.9	-45.0601
64	849.846	64	880.87	64	737.073	63.9	521.386	63.9	42.943	64	-109.716	64	-78.7726	64	-45.1312
64.1	850.016	64.1	881.066	64.1	737.294	64	521.944	64	44.3117	64.1	-109.83	64.1	-78.8774	64.1	-45.2211
64.2	850.17	64.2	881.257	64.2	737.53	64.1	522.484	64.1	45.6609	64.2	-109.929	64.2	-78.9961	64.2	-45.2945
64.3	850.346	64.3	881.416	64.3	737.753	64.2	523.049	64.2	47.0101	64.3	-110.033	64.3	-79.1149	64.3	-45.3742
64.4	850.521	64.4	881.629	64.4	737.994	64.3	523.593	64.3	48.3617	64.4	-110.123	64.4	-79.1555	64.4	-45.4273
64.5	850.702	64.5	881.815	64.5	738.198	64.4	524.156	64.4	49.7164	64.5	-110.22	64.5	-79.1586	64.5	-45.5023
64.6	850.885	64.6	882.012	64.6	738.405	64.5	524.719	64.5	51.0719	64.6	-110.322	64.6	-79.1977	64.6	-45.5578
64.7	851.06	64.7	882.183	64.7	738.624	64.6	525.226	64.6	52.4242	64.7	-110.4	64.7	-79.2368	64.7	-45.607
64.8	851.216	64.8	882.358	64.8	738.865	64.7	525.716	64.7	53.7922	64.8	-110.477	64.8	-79.3383	64.8	-45.6625
64.9	851.417	64.9	882.535	64.9	739.108	64.8	526.219	64.8	55.1742	64.9	-110.521	64.9	-79.3578	64.9	-45.7289
65	851.599	65	882.722	65	739.35	64.9	526.737	64.9	56.557	65	-110.592	65	-79.3859	65	-45.7867
65.1	851.779	65.1	882.897	65.1	739.561	65	527.262	65	57.9117	65.1	-110.673	65.1	-79.4055	65.1	-45.8234
65.2	851.956	65.2	883.054	65.2	739.718	65.1	527.741	65.1	59.2719	65.2	-110.732	65.2	-79.4469	65.2	-45.8656
65.3	852.143	65.3	883.215	65.3	739.913	65.2	528.254	65.2	60.6563	65.3	-110.794	65.3	-79.5148	65.3	-45.8961
65.4	852.327	65.4	883.394	65.4	740.107	65.3	528.745	65.3	62.0609	65.4	-110.848	65.4	-79.5446	65.4	-45.9445
65.5	852.482	65.5	883.534	65.5	740.226	65.4	529.276	65.4	63.4203	65.5	-110.919	65.5	-79.5961	65.5	-46.0297
65.6	852.655	65.6	883.683	65.6	740.413	65.5	529.765	65.5	64.7961	65.6	-110.982	65.6	-79.6289	65.6	-46.107
65.7	852.826	65.7	883.855	65.7	740.6	65.6	530.245	65.6	66.1703	65.7	-111.048	65.7	-79.7242	65.7	-46.1828
65.8	852.954	65.8	884.049	65.8	740.787	65.7	530.69	65.7	67.5531	65.8	-111.135	65.8	-79.7453	65.8	-46.2523
65.9	853.14	65.9	884.214	65.9	740.995	65.8	531.234	65.8	68.9102	65.9	-111.201	65.9	-79.8156	65.9	-46.3179
66	853.305	66	884.359	66	741.212	65.9	531.648	65.9	70.2672	66	-111.298	66	-79.9282	66	-46.4008
66.1	853.456	66.1	884.51	66.1	741.44	66	532.143	66	71.6242	66.1	-111.366	66.1	-80.0102	66.1	-46.4711
66.2	853.596	66.2	884.671	66.2	741.647	66.1	532.554	66.1	72.9437	66.2	-111.451	66.2	-80.093	66.2	-46.5609
66.3	853.782	66.3	884.843	66.3	741.862	66.2	533.015	66.2	74.2969	66.3	-111.533	66.3	-80.1735	66.3	-46.6555
66.4	853.952	66.4	884.995	66.4	742.081	66.3	533.491	66.3	75.6828	66.4	-111.587	66.4	-80.2375	66.4	-46.7281
66.5	854.119	66.5	885.16	66.5	742.26	66.4	533.956	66.4	77.0812	66.5	-111.669	66.5	-80.2844	66.5	-46.8156
66.6	854.288	66.6	885.338	66.6	742.464	66.5	534.433	66.5	78.4836	66.6	-111.74	66.6	-80.3383	66.6	-46.8882
66.7	854.405	66.7	885.503	66.7	742.662	66.6	534.882	66.6	79.8578	66.7	-111.807	66.7	-80.4086	66.7	-47.0101
66.8	854.563	66.8	885.663	66.8	742.87	66.7	535.355	66.7	81.2344	66.8	-111.873	66.8	-80.4672	66.8	-47.0453
66.9	854.733	66.9	885.823	66.9	743.081	66.8	535.812	66.8	82.6398	66.9	-111.953	66.9	-80.518	66.9	-47.0414
67	854.897	67	885.972	67	743.265	66.9	536.284	66.9	84.0234	67	-112.009	67	-80.5812	67	-47.0093
67.1	855.029	67.1	886.148	67.1	743.435	67	536.742	67	85.4289	67.1	-112.077	67.1	-80.6313	67.1	-46.9133
67.2	855.197	67.2	886.296	67.2	743.608	67.1	537.19	67.1	86.8391	67.2	-112.145	67.2	-80.6867	67.2	-47.2359
67.3	855.349	67.3	886.445	67.3	743.804	67.2	537.613	67.2	88.25	67.3	-112.209	67.3	-80.7328	67.3	-47.4515
67.4	855.48	67.4	886.616	67.4	743.998	67.3	538.059	67.3	89.6406	67.4	-112.27	67.4	-80.7555	67.4	-47.5609
67.5	855.623	67.5	886.789	67.5	744.229	67.4	538.502	67.4	91.0695	67.5	-112.334	67.5	-80.8234	67.5	-47.4875
67.6	855.759	67.6	886.955	67.6	744.425	67.5	538.925	67.5	92.4102	67.6	-112.38	67.6	-80.8664	67.6	-47.5242
67.7	855.905	67.7	887.145	67.7	744.603	67.6	539.323	67.6	93.8055	67.7	-112.47	67.7	-80.9321	67.7	-47.5687
67.8	856.075	67.8	887.309	67.8	744.797	67.7	539.745	67.7	95.2031	67.8	-112.541	67.8	-80.9586	67.8	-47.6195
67.9	856.237	67.9	887.479	67.9	744.994	67.8	540.144	67.8	96.5804	67.9	-112.6	67.9	-81.0063	67.9	-47.6672
68	856.369	68	887.624	68	745.19	67.9	540.541	67.9	97.9539	68	-112.656	68	-81.0688	68	-47.7242
68.1	856.487	68.1	887.804	68.1	745.402	68	540.933	68	99.332	68.1	-112.712	68.1	-81.1164	68.1	-47.8187
68.2	856.63	68.2	887.972	68.2	745.605	68.1	541.331	68.1	100.695	68.2	-112.768	68.2	-81.1461	68.2	-47.8812
68.3	856.748	68.3	888.152	68.3	745.794	68.2	541.719	68.2	102.059	68.3	-112.805	68.3	-81.1945	68.3	-47.9594
68.4	856.884	68.4	888.309	68.4	745.967	68.3	542.131	68.3	103.41	68.4	-112.858	68.4	-81.2602	68.4	-48.0219
68.5	857.018	68.5	888.467	68.5	746.159	68.4	542.503	68.4	104.753	68.5	-112.923	68.5	-81.3305	68.5	-48.093
68.6	857.155	68.6	888.656	68.6	746.362	68.5	542.887	68.5	106.141	68.6	-112.974	68.6	-81.3844	68.6	-48.1773
68.7	857.325	68.7	888.848	68.7	746.541	68.6	543.315	68.6	107.503	68.7	-113.043	68.7	-81.4367	68.7	-48.2523
68.8	857.48	68.8	889.018	68.8	746.756	68.7	543.746	68.7	108.869	68.8	-113.064	68.8	-81.4875	68.8	-48.3344
68.9	857.619	68.9	889.168	68.9	746.945	68.8	544.136	68.8	110.249	68.9	-113.115	68.9	-81.5532	68.9	-48.4125
69	857.772	69	889.343	69	747.134	68.9	544.506	68.9	111.618	69	-113.169	69	-81.6071	69	-48.4898
69.1	857.935	69.1	889.531	69.1	747.307	69	544.918	69	112.984	69.1	-113.229	69.1	-81.6555	69.1	-48.5531
69.2	858.081	69.2	889.688	69.2	747.487	69.1	545.328	69.1	114.329	69.2	-113.309	69.2	-81.6774	69.2	-48.6234
69.3	858.177	69.3	889.866	69.3	747.671	69.2	545.729	69.2	115.695	69.3	-113.38	69.3	-81.7336	69.3	-48.6625
69.4	858.298	69.4	890.063	69.4	747.874	69.3	546.12	69.3	117.067	69.4	-113.438	69.4	-81.7914	69.4	-48.7281
69.5	858.392	69.5	890.241	69.5	748.044	69.4	546.5	69.4	118.418	69.5	-113.513	69.5	-81.8305	69.5	-48.7789
69.6	858.494	69.6	890.426	69.6	748.206	69.5	546.87	69.5	119.759	69.6	-113.603	69.6	-81.8664	69.6	-48.8109
69.7	858.631	69.7	890.577	69.7	748.384	69.6	547.253	69.6	121.13	69.7	-113.693	69.7	-81.8961	69.7	-48.8742
69.8	858.823	69.8	890.702	69.8	748.562	69.7	547.605	69.7	122.48	69.8	-113.748	69.8	-81.9672	69.8	-48.9437
69.9	859.01	69.9	890.867	69.9	748.734	69.8	547.972	69.8	123.844	69.9	-113.821	69.9	-82.0461	69.9	-48.9703
70	859.205	70	891.035	70	748.909	69.9	548.351	69.9	125.177	70	-113.877	70	-82.0922	70	-49.0164
70.1	859.349	70.1	891.178	70.1	749.069	70	548.707	70	126.555	70.1	-113.93	70.1	-82.1149	70.1	-49.0187
70.2	859.502	70.2	891.331	70.2	749.229	70.1	549.081	70.1	127.915	70.2	-114.009	70.2	-82.1359	70.2	-49.1508
70.3	859.674	70.3	891.484	70.3	749.374	70.2	549.472	70.2	129.274	70.3	-114.063	70.3	-82.1774	70.3	-49.2766
70.4	859.826	70.4	891.632	70.4	749.549	70.3	549.831	70.3	130.634	70.4	-114.127	70.4	-82.1938	70.4	-49.3375
70.5	859.963	70.5	891.789	70.5	749.712	70.4	550.199	70.4	131.985	70.5	-114.203	70.5	-82.2094	70.5	-49.4008
70.6	860.116	70.6	891.948	70.6	749.887	70.5	550.545	70.5	133.341	70.6	-114.248	70.6	-82.2453	70.6	-49.4906
70.7	860.252	70.7	892.081	70.7	750.052	70.6	550.906	70.6	134.672	70.7	-114.345	70.7	-82.2867	70.7	-49.5609
70.8	860.393	70.8	892.238	70.8	750.217	70.7	551.246	70.7	136.024	70.8	-114.418	70.8	-82.3227	70.8	-49.639
70.9	860.555	70.9	892.397	70.9	750.362	70.8	551.601	70.8	137.384	70.9	-114.47	70.9	-82.3469	70.9	-49.7281
71	860.698	71	892.527	71	750.518	70.9	551.957	70.9	138.689	71	-114.537	71	-82.3719	71	-49.7766
71.1	860.845	71.1	892.714	71.1	750.683	71	552.311	71	139.985	71.1	-114.611	71.1	-82.4055	71.1	-49.8375
71.2	861.006	71.2	892.858	71.2	750.861	71.1	552.648	71.1	141.281	71.2	-114.689	71.2	-82.4586	71.2	-49.8812
71.3	861.135	71.3	892.984	71.3	751.03	71.2	552.959	71.2	142.595	71.3	-114.727	71.3	-82.4953	71.3	-49.9711
71.4	861.255	71.4	893.132	71.4	751.21	71.3	553.277	71.3	143.896	71.4	-114.77	71.4	-82.5727	71.4	-50.0336
71.5	861.401	71.5	893.292	71.5	751.386	71.4	553.608	71.4	145.192	71.5	-114.826	71.5	-82.6383	71.5	-50.0922
71.6	861.541	71.6	893.425	71.6	751.557	71.5	553.933	71.5	146.517	71.6	-114.877	71.6	-82.6984	71.6	-50.1625
71.7	861.694	71.7	893.531	71.7	751.736	71.6	554.266	71.6	147.802	71.7	-114.923	71.7	-82.7399	71.7	-50.2133
71.8	861.81	71.8	893.675	71.8	751.909	71.7	554.609	71.7	149.119	71.8	-114.966	71.8	-82.7836	71.8	-50.2789
71.9	861.919	71.9	893.813	71.9	752.062	71.8	554.937	71.8	150.407	71.9	-115.001	71.9	-82.8375	71.9	-50.314
72	862.045	72	893.972	72	752.248	71.9	555.245	71.9	151.692	72	-115.076	72	-82.8813	72	-50.3812
72.1	862.169	72.1	894.14	72.1	752.452	72	555.561	72	152.986	72.1	-115.127	72.1	-82.9453	72.1	-50.4289
72.2	862.295	72.2	894.32	72.2	752.627	72.1	555.882	72.1	154.295	72.2	-115.195	72.2	-83.0414	72.2	-50.4976
72.3	862.427	72.3	894.484	72.3	752.8	72.2	556.238	72.2	155.617	72.3	-115.275	72.3	-83.1118	72.3	-50.5492
72.4	862.565	72.4	894.644	72.4	752.971	72.3	556.581	72.3	156.901	72.4	-115.302	72.4	-83.1969	72.4	-50.5969
72.5	862.706	72.5	894.792	72.5	753.127	72.4	556.902	72.4	158.188	72.5	-115.297	72.5	-83.2453	72.5	-50.6578
72.6	862.853	72.6	894.933	72.6	753.315	72.5	557.222	72.5	159.455	72.6	-115.262	72.6	-83.2993	72.6	-50.7211
72.7	862.987	72.7	895.101	72.7	753.475	72.6	557.542	72.6	160.724	72.7	-115.286	72.7	-83.3578	72.7	-50.7867
72.8	863.134	72.8	895.273	72.8	753.652	72.7	557.867	72.7	161.994	72.8	-115.313	72.8	-83.4117	72.8	-50.8344
72.9	863.28	72.9	895.406	72.9	753.805	72.8	558.205	72.8	163.266	72.9	-115.329	72.9	-83.4289	72.9	-50.8765
73	863.452	73	895.554	73	753.994	72.9	558.52	72.9	164.565	73	-115.333	73	-83.4555	73	-50.9289
73.1	863.584	73.1	895.707	73.1	754.152	73	558.851	73	165.853	73.1	-115.36	73.1	-83.4852	73.1	-50.9898
73.2	863.733	73.2	895.855	73.2	754.3	73.1	559.152	73.1	167.13	73.2	-115.403	73.2	-83.5102	73.2	-51.0414
73.3	863.873	73.3	895.979	73.3	754.467	73.2	559.452	73.2	168.37	73.3	-115.419	73.3	-83.5109	73.3	-51.0844
73.4	863.986	73.4	896.132	73.4	754.647	73.3	559.719	73.3	169.63	73.4	-115.442	73.4	-83.5485	73.4	-51.1187
73.5	864.14	73.5	896.273	73.5	754.855	73.4	559.988	73.4	170.889	73.5	-115.49	73.5	-83.5578	73.5	-51.1429
73.6	864.279	73.6	896.406	73.6	755.021	73.5	560.276	73.5	172.166	73.6	-115.508	73.6	-83.5797	73.6	-51.189
73.7	864.424	73.7	896.549	73.7	755.218	73.6	560.581	73.6	173.423	73.7	-115.541	73.7	-83.5922	73.7	-51.2406
73.8	864.548	73.8	896.695	73.8	755.421	73.7	560.867	73.7	174.68	73.8	-115.548	73.8	-83.6235	73.8	-51.3
73.9	864.674	73.9	896.843	73.9	755.612	73.8	561.159	73.8	175.916	73.9	-115.582	73.9	-83.6703	73.9	-51.3524
74	864.805	74	897.003	74	755.775	73.9	561.457	73.9	177.161	74	-115.574	74	-83.7055	74	-51.3976
74.1	864.913	74.1	897.152	74.1	755.933	74	561.746	74	178.365	74.1	-115.575	74.1	-83.7039	74.1	-51.4359
74.2	865.056	74.2	897.297	74.2	756.044	74.1	562.049	74.1	179.623	74.2	-115.584	74.2	-83.7297	74.2	-51.4859
74.3	865.187	74.3	897.46	74.3	756.175	74.2	562.336	74.2	180.861	74.3	-115.582	74.3	-83.7516	74.3	-51.5453
74.4	865.326	74.4	897.64	74.4	756.288	74.3	562.647	74.3	182.087	74.4	-115.602	74.4	-83.7789	74.4	-51.5875
74.5	865.483	74.5	897.773	74.5	756.42	74.4	562.962	74.4	183.302	74.5	-115.626	74.5	-83.7836	74.5	-51.6633
74.6	865.623	74.6	897.902	74.6	756.601	74.5	563.273	74.5	184.526	74.6	-115.645	74.6	-83.8032	74.6	-51.7523
74.7	865.779	74.7	898.016	74.7	756.768	74.6	563.569	74.6	185.787	74.7	-115.645	74.7	-83.8266	74.7	-51.8109
74.8	865.916	74.8	898.163	74.8	756.916	74.7	563.855	74.7	187.053	74.8	-115.638	74.8	-83.8414	74.8	-51.8734
74.9	866.084	74.9	898.304	74.9	757.086	74.8	564.144	74.8	188.182	74.9	-115.626	74.9	-83.8649	74.9	-51.9031
75	866.224	75	898.46	75	757.268	74.9	564.413	74.9	189.364	75	-115.602	75	-83.8492	75	-51.9367
75.1	866.393	75.1	898.617	75.1	757.459	75	564.659	75	190.561	75.1	-115.611	75.1	-83.9008	75.1	-51.9976
75.2	866.534	75.2	898.734	75.2	757.632	75.1	564.926	75.1	191.787	75.2	-115.613	75.2	-83.968	75.2	-52.0969
75.3	866.635	75.3	898.882	75.3	757.812	75.2	565.215	75.2	192.959	75.3	-115.614	75.3	-84.0094	75.3	-52.15
75.4	866.759	75.4	899.011	75.4	757.994	75.3	565.484	75.3	194.115	75.4	-115.602	75.4	-84.0336	75.4	-52.2047
75.5	866.9	75.5	899.144	75.5	758.174	75.4	565.748	75.4	195.244	75.5	-115.602	75.5	-84.0844	75.5	-52.2797
75.6	867.017	75.6	899.293	75.6	758.351	75.5	566.001	75.5	196.427	75.6	-115.599	75.6	-84.1508	75.6	-52.3539
75.7	867.128	75.7	899.452	75.7	758.503	75.6	566.265	75.6	197.616	75.7	-115.582	75.7	-84.2258	75.7	-52.4125
75.8	867.248	75.8	899.609	75.8	758.647	75.7	566.526	75.7	198.802	75.8	-115.587	75.8	-84.2946	75.8	-52.4859
75.9	867.385	75.9	899.769	75.9	758.811	75.8	566.785	75.8	199.991	75.9	-115.611	75.9	-84.3618	75.9	-52.557
76	867.498	76	899.926	76	758.945	75.9	567.058	75.9	201.159	76	-115.62	76	-84.3898	76	-52.6437
76.1	867.631	76.1	900.089	76.1	759.073	76	567.336	76	202.323	76.1	-115.638	76.1	-84.4391	76.1	-52.7164
76.2	867.767	76.2	900.21	76.2	759.19	76.1	567.632	76.1	203.463	76.2	-115.638	76.2	-84.4469	76.2	-52.7844
76.3	867.909	76.3	900.355	76.3	759.306	76.2	567.882	76.2	204.643	76.3	-115.65	76.3	-84.475	76.3	-52.8492
76.4	868.061	76.4	900.488	76.4	759.433	76.3	568.128	76.3	205.806	76.4	-115.656	76.4	-84.507	76.4	-52.9125
76.5	868.202	76.5	900.635	76.5	759.557	76.4	568.384	76.4	206.963	76.5	-115.657	76.5	-84.5602	76.5	-52.9711
76.6	868.315	76.6	900.761	76.6	759.702	76.5	568.62	76.5	208.091	76.6	-115.645	76.6	-84.5914	76.6	-53.0211
76.7	868.463	76.7	900.89	76.7	759.819	76.6	568.874	76.6	209.209	76.7	-115.63	76.7	-84.6039	76.7	-53.0656
76.8	868.607	76.8	901.039	76.8	759.967	76.7	569.145	76.7	210.323	76.8	-115.617	76.8	-84.6078	76.8	-53.1258
76.9	868.752	76.9	901.188	76.9	760.116	76.8	569.409	76.8	211.435	76.9	-115.594	76.9	-84.6258	76.9	-53.1555
77	868.888	77	901.327	77	760.261	76.9	569.637	76.9	212.561	77	-115.574	77	-84.6625	77	-53.2007
77.1	869.034	77.1	901.445	77.1	760.421	77	569.882	77	213.666	77.1	-115.555	77.1	-84.6906	77.1	-53.2406
77.2	869.155	77.2	901.577	77.2	760.562	77.1	570.129	77.1	214.795	77.2	-115.524	77.2	-84.7242	77.2	-53.3031
77.3	869.279	77.3	901.746	77.3	760.717	77.2	570.363	77.2	215.85	77.3	-115.516	77.3	-84.7641	77.3	-53.3687
77.4	869.408	77.4	901.882	77.4	760.897	77.3	570.605	77.3	216.939	77.4	-115.535	77.4	-84.818	77.4	-53.4203
77.5	869.538	77.5	902.078	77.5	761.042	77.4	570.823	77.4	218.031	77.5	-115.563	77.5	-84.8461	77.5	-53.4992
77.6	869.673	77.6	902.214	77.6	761.198	77.5	571.07	77.5	219.182	77.6	-115.586	77.6	-84.8805	77.6	-53.5359
77.7	869.827	77.7	902.281	77.7	761.323	77.6	571.323	77.6	220.323	77.7	-115.587	77.7	-84.9196	77.7	-53.5883
77.8	869.978	77.8	902.382	77.8	761.467	77.7	571.535	77.7	221.404	77.8	-115.566	77.8	-84.9633	77.8	-53.6625
77.9	870.096	77.9	902.472	77.9	761.616	77.8	571.753	77.8	222.518	77.9	-115.516	77.9	-84.9977	77.9	-53.725
78	870.228	78	902.566	78	761.761	77.9	571.967	77.9	223.608	78	-115.504	78	-84.9868	78	-53.7789
78.1	870.369	78.1	902.659	78.1	761.909	78	572.188	78	224.691	78.1	-115.501	78.1	-85.0219	78.1	-53.8422
78.2	870.51	78.2	902.788	78.2	762.034	78.1	572.387	78.1	225.775	78.2	-115.481	78.2	-85.0797	78.2	-53.8851
78.3	870.655	78.3	902.926	78.3	762.198	78.2	572.596	78.2	226.874	78.3	-115.472	78.3	-85.0922	78.3	-53.9078
78.4	870.815	78.4	903.047	78.4	762.362	78.3	572.816	78.3	227.908	78.4	-115.45	78.4	-85.1188	78.4	-53.9437
78.5	870.966	78.5	903.202	78.5	762.498	78.4	573.035	78.4	228.933	78.5	-115.45	78.5	-85.1516	78.5	-53.9828
78.6	871.104	78.6	903.324	78.6	762.671	78.5	573.261	78.5	229.994	78.6	-115.413	78.6	-85.1813	78.6	-54.0289
78.7	871.228	78.7	903.491	78.7	762.85	78.6	573.496	78.6	231.03	78.7	-115.391	78.7	-85.1891	78.7	-54.0414
78.8	871.346	78.8	903.613	78.8	762.998	78.7	573.741	78.7	232.061	78.8	-115.387	78.8	-85.2375	78.8	-54.057
78.9	871.466	78.9	903.725	78.9	763.147	78.8	573.991	78.8	233.081	78.9	-115.351	78.9	-85.2633	78.9	-54.1461
79	871.612	79	903.86	79	763.327	78.9	574.23	78.9	234.131	79	-115.313	79	-85.2859	79	-54.2687
79.1	871.716	79.1	904.003	79.1	763.464	79	574.457	79	235.146	79.1	-115.285	79.1	-85.3273	79.1	-54.3297
79.2	871.842	79.2	904.127	79.2	763.608	79.1	574.679	79.1	236.158	79.2	-115.238	79.2	-85.361	79.2	-54.3882
79.3	871.956	79.3	904.251	79.3	763.745	79.2	574.919	79.2	237.156	79.3	-115.195	79.3	-85.3805	79.3	-54.4633
79.4	872.076	79.4	904.377	79.4	763.87	79.3	575.171	79.3	238.193	79.4	-115.165	79.4	-85.3969	79.4	-54.5101
79.5	872.174	79.5	904.508	79.5	763.991	79.4	575.395	79.4	239.214	79.5	-115.132	79.5	-85.4196	79.5	-54.5757
79.6	872.264	79.6	904.627	79.6	764.132	79.5	575.632	79.5	240.217	79.6	-115.105	79.6	-85.4555	79.6	-54.6234
79.7	872.388	79.7	904.746	79.7	764.268	79.6	575.866	79.6	241.232	79.7	-115.083	79.7	-85.4899	79.7	-54.6281
79.8	872.522	79.8	904.87	79.8	764.4	79.7	576.071	79.7	242.241	79.8	-115.066	79.8	-85.4868	79.8	-54.6961
79.9	872.658	79.9	904.988	79.9	764.542	79.8	576.284	79.8	243.253	79.9	-115.02	79.9	-85.518	79.9	-54.7523
80	872.791	80	905.132	80	764.663	79.9	576.484	79.9	244.268	80	-115.003	80	-85.5281	80	-54.7914
80.1	872.905	80.1	905.262	80.1	764.792	80	576.702	80	245.237	80.1	-114.986	80.1	-85.5532	80.1	-54.8539
80.2	873.053	80.2	905.37	80.2	764.948	80.1	576.934	80.1	246.213	80.2	-114.952	80.2	-85.5719	80.2	-54.9047
80.3	873.169	80.3	905.52	80.3	765.072	80.2	577.171	80.2	247.198	80.3	-114.911	80.3	-85.5961	80.3	-54.9468
80.4	873.284	80.4	905.671	80.4	765.187	80.3	577.429	80.3	248.205	80.4	-114.879	80.4	-85.6274	80.4	-54.9898
80.5	873.439	80.5	905.82	80.5	765.346	80.4	577.656	80.4	249.194	80.5	-114.823	80.5	-85.6696	80.5	-55.0578
80.6	873.605	80.6	905.965	80.6	765.491	80.5	577.877	80.5	250.164	80.6	-114.77	80.6	-85.7368	80.6	-55.1024
80.7	873.752	80.7	906.127	80.7	765.627	80.6	578.091	80.6	251.142	80.7	-114.699	80.7	-85.7563	80.7	-55.1555
80.8	873.865	80.8	906.234	80.8	765.764	80.7	578.307	80.7	252.089	80.8	-114.624	80.8	-85.7859	80.8	-55.225
80.9	873.991	80.9	906.394	80.9	765.902	80.8	578.523	80.8	253.065	80.9	-114.531	80.9	-85.8227	80.9	-55.282
81	874.124	81	906.508	81	766.026	80.9	578.749	80.9	254.031	81	-114.434	81	-85.861	81	-55.3351
81.1	874.235	81.1	906.632	81.1	766.166	81	578.953	81	254.995	81.1	-114.374	81.1	-85.925	81.1	-55.4
81.2	874.355	81.2	906.792	81.2	766.297	81.1	579.164	81.1	255.983	81.2	-114.296	81.2	-85.9969	81.2	-55.4273
81.3	874.463	81.3	906.918	81.3	766.409	81.2	579.378	81.2	256.948	81.3	-114.243	81.3	-86.0219	81.3	-55.4828
81.4	874.583	81.4	907.053	81.4	766.542	81.3	579.589	81.3	257.921	81.4	-114.174	81.4	-86.0602	81.4	-55.5531
81.5	874.698	81.5	907.176	81.5	766.698	81.4	579.788	81.4	258.866	81.5	-114.083	81.5	-86.1086	81.5	-55.5875
81.6	874.818	81.6	907.297	81.6	766.831	81.5	579.957	81.5	259.795	81.6	-113.995	81.6	-86.1344	81.6	-55.6351
81.7	874.905	81.7	907.409	81.7	766.967	81.6	580.164	81.6	260.702	81.7	-113.902	81.7	-86.1235	81.7	-55.689
81.8	874.99	81.8	907.531	81.8	767.103	81.7	580.375	81.7	261.635	81.8	-113.832	81.8	-86.1774	81.8	-55.7367
81.9	875.119	81.9	907.688	81.9	767.23	81.8	580.593	81.8	262.562	81.9	-113.777	81.9	-86.1977	81.9	-55.7836
82	875.225	82	907.812	82	767.37	81.9	580.797	81.9	263.455	82	-113.711	82	-86.2328	82	-55.8133
82.1	875.33	82.1	907.953	82.1	767.506	82	580.984	82	264.366	82.1	-113.655	82.1	-86.3188	82.1	-55.8508
82.2	875.452	82.2	908.113	82.2	767.635	82.1	581.171	82.1	265.245	82.2	-113.535	82.2	-86.3766	82.2	-55.9078
82.3	875.607	82.3	908.241	82.3	767.734	82.2	581.387	82.2	266.113	82.3	-113.417	82.3	-86.3297	82.3	-55.9781
82.4	875.737	82.4	908.39	82.4	767.846	82.3	581.581	82.3	266.995	82.4	-113.308	82.4	-86.3211	82.4	-56.0336
82.5	875.869	82.5	908.531	82.5	767.972	82.4	581.769	82.4	267.912	82.5	-113.206	82.5	-86.3383	82.5	-56.0773
82.6	875.991	82.6	908.664	82.6	768.088	82.5	581.953	82.5	268.823	82.6	-113.094	82.6	-86.4047	82.6	-56.15
82.7	876.099	82.7	908.805	82.7	768.21	82.6	582.156	82.6	269.715	82.7	-112.992	82.7	-86.4586	82.7	-56.2007
82.8	876.225	82.8	908.941	82.8	768.351	82.7	582.343	82.7	270.623	82.8	-112.912	82.8	-86.5266	82.8	-56.2523
82.9	876.357	82.9	909.062	82.9	768.491	82.8	582.531	82.8	271.491	82.9	-112.805	82.9	-86.5672	82.9	-56.3109
83	876.491	83	909.179	83	768.62	82.9	582.71	82.9	272.37	83	-112.695	83	-86.5688	83	-56.3804
83.1	876.636	83.1	909.305	83.1	768.759	83	582.875	83	273.256	83.1	-112.581	83.1	-86.5641	83.1	-56.4289
83.2	876.787	83.2	909.413	83.2	768.902	83.1	583.081	83.1	274.101	83.2	-112.475	83.2	-86.5641	83.2	-56.4976
83.3	876.913	83.3	909.514	83.3	769.03	83.2	583.277	83.2	274.982	83.3	-112.368	83.3	-86.5719	83.3	-56.5336
83.4	877.037	83.4	909.645	83.4	769.21	83.3	583.484	83.3	275.875	83.4	-112.28	83.4	-86.5914	83.4	-56.5648
83.5	877.159	83.5	909.753	83.5	769.362	83.4	583.683	83.4	276.724	83.5	-112.179	83.5	-86.6125	83.5	-56.5945
83.6	877.267	83.6	909.848	83.6	769.486	83.5	583.858	83.5	277.538	83.6	-112.062	83.6	-86.6102	83.6	-56.6398
83.7	877.393	83.7	909.948	83.7	769.62	83.6	584.051	83.6	278.39	83.7	-111.977	83.7	-86.6274	83.7	-56.6727
83.8	877.509	83.8	910.058	83.8	769.748	83.7	584.266	83.7	279.225	83.8	-111.851	83.8	-86.6539	83.8	-56.7094
83.9	877.634	83.9	910.171	83.9	769.846	83.8	584.434	83.8	280.062	83.9	-111.734	83.9	-86.6782	83.9	-56.7398
84	877.745	84	910.305	84	769.977	83.9	584.623	83.9	280.885	84	-111.62	84	-86.7242	84	-56.7406
84.1	877.837	84.1	910.445	84.1	770.1	84	584.805	84	281.722	84.1	-111.491	84.1	-86.7555	84.1	-56.757
84.2	877.917	84.2	910.593	84.2	770.234	84.1	584.996	84.1	282.538	84.2	-111.39	84.2	-86.7993	84.2	-56.7977
84.3	878.034	84.3	910.734	84.3	770.358	84.2	585.176	84.2	283.373	84.3	-111.296	84.3	-86.8484	84.3	-56.8265
84.4	878.169	84.4	910.87	84.4	770.467	84.3	585.363	84.3	284.179	84.4	-111.215	84.4	-86.8852	84.4	-56.8656
84.5	878.298	84.5	911.016	84.5	770.562	84.4	585.511	84.4	284.995	84.5	-111.109	84.5	-86.9586	84.5	-56.9047
84.6	878.425	84.6	911.135	84.6	770.717	84.5	585.684	84.5	285.82	84.6	-111.011	84.6	-87.0141	84.6	-56.9539
84.7	878.555	84.7	911.262	84.7	770.831	84.6	585.885	84.6	286.62	84.7	-110.89	84.7	-87.0914	84.7	-56.9992
84.8	878.667	84.8	911.406	84.8	770.982	84.7	586.074	84.7	287.417	84.8	-110.78	84.8	-87.1594	84.8	-57.057
84.9	878.787	84.9	911.526	84.9	771.12	84.8	586.273	84.8	288.245	84.9	-110.664	84.9	-87.2563	84.9	-57.0945
85	878.905	85	911.661	85	771.241	84.9	586.465	84.9	289.053	85	-110.542	85	-87.3531	85	-57.1703
85.1	879.052	85.1	911.776	85.1	771.327	85	586.652	85	289.859	85.1	-110.428	85.1	-87.3453	85.1	-57.2328
85.2	879.187	85.2	911.875	85.2	771.48	85.1	586.823	85.1	290.645	85.2	-110.308	85.2	-87.3297	85.2	-57.3031
85.3	879.342	85.3	911.96	85.3	771.498	85.2	587.004	85.2	291.432	85.3	-110.188	85.3	-87.3188	85.3	-57.3578
85.4	879.475	85.4	912.063	85.4	771.545	85.3	587.183	85.3	292.238	85.4	-110.037	85.4	-87.3484	85.4	-57.3641
85.5	879.583	85.5	912.163	85.5	771.581	85.4	587.328	85.4	293.019	85.5	-109.895	85.5	-87.3805	85.5	-57.4125
85.6	879.695	85.6	912.261	85.6	771.647	85.5	587.498	85.5	293.788	85.6	-109.765	85.6	-87.3844	85.6	-57.4554
85.7	879.815	85.7	912.324	85.7	771.8	85.6	587.659	85.6	294.573	85.7	-109.627	85.7	-87.3969	85.7	-57.4898
85.8	879.944	85.8	912.484	85.8	771.984	85.7	587.821	85.7	295.359	85.8	-109.495	85.8	-87.4235	85.8	-57.514
85.9	880.083	85.9	912.647	85.9	772.127	85.8	587.967	85.8	296.12	85.9	-109.335	85.9	-87.4508	85.9	-57.5289
86	880.202	86	912.766	86	772.234	85.9	588.118	85.9	296.893	86	-109.198	86	-87.4868	86	-57.5648
86.1	880.323	86.1	912.882	86.1	772.373	86	588.273	86	297.656	86.1	-109.059	86.1	-87.5258	86.1	-57.5914
86.2	880.467	86.2	913.004	86.2	772.499	86.1	588.436	86.1	298.374	86.2	-108.896	86.2	-87.5789	86.2	-57.6351
86.3	880.588	86.3	913.147	86.3	772.632	86.2	588.61	86.2	299.113	86.3	-108.792	86.3	-87.611	86.3	-57.7054
86.4	880.713	86.4	913.273	86.4	772.773	86.3	588.761	86.3	299.866	86.4	-108.671	86.4	-87.6469	86.4	-57.7515
86.5	880.826	86.5	913.395	86.5	772.877	86.4	588.909	86.4	300.602	86.5	-108.546	86.5	-87.6813	86.5	-57.8179
86.6	880.932	86.6	913.523	86.6	772.987	86.5	589.094	86.5	301.362	86.6	-108.394	86.6	-87.7125	86.6	-57.9047
86.7	881.015	86.7	913.656	86.7	773.096	86.6	589.254	86.6	302.105	86.7	-108.245	86.7	-87.7516	86.7	-57.975
86.8	881.138	86.8	913.753	86.8	773.215	86.7	589.424	86.7	302.847	86.8	-108.095	86.8	-87.7875	86.8	-58.0336
86.9	881.233	86.9	913.838	86.9	773.338	86.8	589.59	86.8	303.546	86.9	-107.964	86.9	-87.8024	86.9	-58.0797
87	881.33	87	913.957	87	773.456	86.9	589.773	86.9	304.249	87	-107.855	87	-87.8211	87	-58.1382
87.1	881.432	87.1	914.086	87.1	773.57	87	589.948	87	304.956	87.1	-107.682	87.1	-87.8188	87.1	-58.2054
87.2	881.534	87.2	914.198	87.2	773.671	87.1	590.125	87.1	305.686	87.2	-107.495	87.2	-87.8453	87.2	-58.264
87.3	881.599	87.3	914.308	87.3	773.807	87.2	590.293	87.2	306.41	87.3	-107.304	87.3	-87.8414	87.3	-58.325
87.4	881.689	87.4	914.43	87.4	773.936	87.3	590.468	87.3	307.138	87.4	-107.154	87.4	-87.8618	87.4	-58.3461
87.5	881.777	87.5	914.562	87.5	774.055	87.4	590.636	87.4	307.859	87.5	-106.984	87.5	-87.8571	87.5	-58.3734
87.6	881.896	87.6	914.679	87.6	774.181	87.5	590.824	87.5	308.558	87.6	-106.838	87.6	-87.8453	87.6	-58.4195
87.7	881.991	87.7	914.797	87.7	774.305	87.6	590.973	87.6	309.252	87.7	-106.703	87.7	-87.8375	87.7	-58.4429
87.8	882.123	87.8	914.897	87.8	774.416	87.7	591.164	87.7	309.948	87.8	-106.541	87.8	-87.8484	87.8	-58.482
87.9	882.228	87.9	915.04	87.9	774.526	87.8	591.327	87.8	310.64	87.9	-106.386	87.9	-87.8578	87.9	-58.5258
88	882.331	88	915.162	88	774.652	87.9	591.504	87.9	311.35	88	-106.224	88	-87.8602	88	-58.5844
88.1	882.44	88.1	915.302	88.1	774.761	88	591.679	88	312.051	88.1	-106.085	88.1	-87.8727	88.1	-58.6273
88.2	882.561	88.2	915.413	88.2	774.877	88.1	591.855	88.1	312.76	88.2	-105.949	88.2	-87.8969	88.2	-58.6649
88.3	882.682	88.3	915.535	88.3	774.991	88.2	592.035	88.2	313.456	88.3	-105.791	88.3	-87.907	88.3	-58.7375
88.4	882.803	88.4	915.678	88.4	775.12	88.3	592.205	88.3	314.164	88.4	-105.616	88.4	-87.9282	88.4	-58.7906
88.5	882.908	88.5	915.777	88.5	775.229	88.4	592.363	88.4	314.815	88.5	-105.416	88.5	-87.943	88.5	-58.8609
88.6	883.009	88.6	915.885	88.6	775.343	88.5	592.555	88.5	315.468	88.6	-105.205	88.6	-87.9586	88.6	-58.8882
88.7	883.116	88.7	915.984	88.7	775.456	88.6	592.715	88.6	316.148	88.7	-104.995	88.7	-88.0102	88.7	-58.9515
88.8	883.236	88.8	916.093	88.8	775.569	88.7	592.873	88.7	316.827	88.8	-104.796	88.8	-88.025	88.8	-58.9867
88.9	883.35	88.9	916.198	88.9	775.676	88.8	593.004	88.8	317.515	88.9	-104.619	88.9	-88.0446	88.9	-59.0258
89	883.486	89	916.309	89	775.795	88.9	593.164	88.9	318.195	89	-104.463	89	-88.0688	89	-59.0601
89.1	883.605	89.1	916.416	89.1	775.897	89	593.336	89	318.799	89.1	-104.273	89.1	-88.1227	89.1	-59.0914
89.2	883.733	89.2	916.52	89.2	776.03	89.1	593.472	89.1	319.398	89.2	-104.048	89.2	-88.1735	89.2	-59.1304
89.3	883.837	89.3	916.635	89.3	776.159	89.2	593.613	89.2	320.019	89.3	-103.866	89.3	-88.2	89.3	-59.1594
89.4	883.976	89.4	916.758	89.4	776.273	89.3	593.761	89.3	320.644	89.4	-103.671	89.4	-88.2336	89.4	-59.2078
89.5	884.122	89.5	916.855	89.5	776.362	89.4	593.895	89.4	321.277	89.5	-103.49	89.5	-88.2703	89.5	-59.2281
89.6	884.26	89.6	916.956	89.6	776.482	89.5	594.016	89.5	321.894	89.6	-103.284	89.6	-88.3188	89.6	-59.2719
89.7	884.394	89.7	917.089	89.7	776.589	89.6	594.155	89.6	322.52	89.7	-103.101	89.7	-88.3844	89.7	-59.3344
89.8	884.541	89.8	917.203	89.8	776.691	89.7	594.293	89.7	323.156	89.8	-102.897	89.8	-88.4188	89.8	-59.3609
89.9	884.646	89.9	917.324	89.9	776.795	89.8	594.434	89.8	323.777	89.9	-102.669	89.9	-88.4672	89.9	-59.4047
90	884.76	90	917.434	90	776.909	89.9	594.558	89.9	324.406	90	-102.429	90	-88.5016	90	-59.4312
90.1	884.878	90.1	917.542	90.1	777.006	90	594.71	90	325.019	90.1	-102.22	90.1	-88.5453	90.1	-59.4781
90.2	885.002	90.2	917.676	90.2	777.112	90.1	594.852	90.1	325.62	90.2	-101.999	90.2	-88.5836	90.2	-59.55
90.3	885.149	90.3	917.803	90.3	777.198	90.2	595.067	90.2	326.265	90.3	-101.783	90.3	-88.5953	90.3	-59.5867
90.4	885.252	90.4	917.934	90.4	777.28	90.3	595.295	90.3	326.902	90.4	-101.56	90.4	-88.6227	90.4	-59.6281
90.5	885.331	90.5	918.047	90.5	777.397	90.4	595.461	90.4	327.531	90.5	-101.323	90.5	-88.6391	90.5	-59.657
90.6	885.445	90.6	918.152	90.6	777.511	90.5	595.574	90.5	328.139	90.6	-101.073	90.6	-88.6852	90.6	-59.6906
90.7	885.561	90.7	918.266	90.7	777.612	90.6	595.695	90.6	328.77	90.7	-100.834	90.7	-88.7	90.7	-59.7195
90.8	885.689	90.8	918.37	90.8	777.729	90.7	595.851	90.7	329.378	90.8	-100.596	90.8	-88.7094	90.8	-59.7281
90.9	885.784	90.9	918.496	90.9	777.819	90.8	596.007	90.8	329.976	90.9	-100.361	90.9	-88.736	90.9	-59.7836
91	885.927	91	918.601	91	777.902	90.9	596.169	90.9	330.585	91	-100.116	91	-88.7516	91	-59.8414
91.1	886.034	91.1	918.702	91.1	778.006	91	596.308	91	331.163	91.1	-99.8773	91.1	-88.7828	91.1	-59.8734
91.2	886.146	91.2	918.784	91.2	778.123	91.1	596.465	91.1	331.796	91.2	-99.6226	91.2	-88.7946	91.2	-59.9117
91.3	886.252	91.3	918.848	91.3	778.23	91.2	596.628	91.2	332.374	91.3	-99.3773	91.3	-88.8266	91.3	-59.9507
91.4	886.35	91.4	918.948	91.4	778.336	91.3	596.793	91.3	333	91.4	-99.1422	91.4	-88.8375	91.4	-59.9633
91.5	886.498	91.5	919.016	91.5	778.44	91.4	596.941	91.4	333.58	91.5	-98.889	91.5	-88.8484	91.5	-60.0093
91.6	886.631	91.6	919.101	91.6	778.526	91.5	597.105	91.5	334.151	91.6	-98.6539	91.6	-88.8774	91.6	-60.0531
91.7	886.737	91.7	919.195	91.7	778.635	91.6	597.262	91.6	334.73	91.7	-98.4086	91.7	-88.8649	91.7	-60.1078
91.8	886.869	91.8	919.315	91.8	778.73	91.7	597.448	91.7	335.316	91.8	-98.1656	91.8	-88.8649	91.8	-60.15
91.9	886.978	91.9	919.414	91.9	778.812	91.8	597.586	91.8	335.913	91.9	-97.9211	91.9	-88.8797	91.9	-60.225
92	887.092	92	919.519	92	778.924	91.9	597.754	91.9	336.542	92	-97.6851	92	-88.8937	92	-60.2711
92.1	887.202	92.1	919.645	92.1	779.042	92	597.909	92	337.078	92.1	-97.4547	92.1	-88.9274	92.1	-60.307
92.2	887.291	92.2	919.766	92.2	779.143	92.1	598.066	92.1	337.546	92.2	-97.2367	92.2	-88.9422	92.2	-60.3609
92.3	887.413	92.3	919.882	92.3	779.273	92.2	598.218	92.2	338.066	92.3	-97.0211	92.3	-88.9821	92.3	-60.4125
92.4	887.502	92.4	920.016	92.4	779.405	92.3	598.339	92.3	338.616	92.4	-96.7797	92.4	-89.0024	92.4	-60.4742
92.5	887.614	92.5	920.135	92.5	779.523	92.4	598.48	92.4	339.139	92.5	-96.525	92.5	-89.0555	92.5	-60.5258
92.6	887.687	92.6	920.262	92.6	779.623	92.5	598.657	92.5	339.688	92.6	-96.3101	92.6	-89.0883	92.6	-60.5914
92.7	887.787	92.7	920.387	92.7	779.741	92.6	598.804	92.6	340.277	92.7	-96.0734	92.7	-89.1227	92.7	-60.6226
92.8	887.878	92.8	920.511	92.8	779.847	92.7	598.941	92.7	340.816	92.8	-95.8453	92.8	-89.1703	92.8	-60.6422
92.9	888.01	92.9	920.601	92.9	779.995	92.8	599.074	92.8	341.394	92.9	-95.6102	92.9	-89.2	92.9	-60.6929
93	888.131	93	920.698	93	780.113	92.9	599.227	92.9	341.945	93	-95.35	93	-89.2516	93	-60.7125
93.1	888.263	93.1	920.805	93.1	780.245	93	599.366	93	342.476	93.1	-95.1148	93.1	-89.2993	93.1	-60.7203
93.2	888.405	93.2	920.906	93.2	780.366	93.1	599.509	93.1	343.023	93.2	-94.8726	93.2	-89.3141	93.2	-60.7492
93.3	888.509	93.3	920.999	93.3	780.491	93.2	599.643	93.2	343.581	93.3	-94.6	93.3	-89.3531	93.3	-60.7742
93.4	888.615	93.4	921.12	93.4	780.601	93.3	599.773	93.3	344.109	93.4	-94.3101	93.4	-89.3844	93.4	-60.8101
93.5	888.745	93.5	921.234	93.5	780.686	93.4	599.902	93.4	344.608	93.5	-94.0297	93.5	-89.4188	93.5	-60.8195
93.6	888.853	93.6	921.331	93.6	780.8	93.5	600.055	93.5	345.105	93.6	-93.7593	93.6	-89.4625	93.6	-60.8414
93.7	888.995	93.7	921.441	93.7	780.913	93.6	600.163	93.6	345.602	93.7	-93.4852	93.7	-89.518	93.7	-60.8531
93.8	889.112	93.8	921.535	93.8	781.006	93.7	600.281	93.7	346.113	93.8	-93.1968	93.8	-89.5493	93.8	-60.8851
93.9	889.216	93.9	921.645	93.9	781.123	93.8	600.386	93.8	346.639	93.9	-92.9	93.9	-89.5984	93.9	-60.9242
94	889.327	94	921.773	94	781.237	93.9	600.523	93.9	347.141	94	-92.607	94	-89.6703	94	-60.939
94.1	889.431	94.1	921.878	94.1	781.355	94	600.633	94	347.632	94.1	-92.3297	94.1	-89.7	94.1	-60.9664
94.2	889.522	94.2	921.992	94.2	781.462	94.1	600.766	94.1	348.124	94.2	-92.0367	94.2	-89.7368	94.2	-61.0062
94.3	889.614	94.3	922.105	94.3	781.555	94.2	600.885	94.2	348.585	94.3	-91.7547	94.3	-89.8063	94.3	-61.0289
94.4	889.706	94.4	922.21	94.4	781.666	94.3	601.004	94.3	349.073	94.4	-91.4711	94.4	-89.8461	94.4	-61.0679
94.5	889.764	94.5	922.297	94.5	781.741	94.4	601.113	94.4	349.581	94.5	-91.2086	94.5	-89.9117	94.5	-61.1086
94.6	889.85	94.6	922.39	94.6	781.846	94.5	601.23	94.5	350.089	94.6	-90.9227	94.6	-89.9547	94.6	-61.1297
94.7	889.905	94.7	922.48	94.7	781.952	94.6	601.344	94.6	350.61	94.7	-90.6265	94.7	-89.9664	94.7	-61.1578
94.8	889.942	94.8	922.57	94.8	782.065	94.7	601.465	94.7	351.144	94.8	-90.3336	94.8	-89.9907	94.8	-61.2015
94.9	889.886	94.9	922.668	94.9	782.171	94.8	601.574	94.8	351.659	94.9	-90.0679	94.9	-90.0594	94.9	-61.2289
95	890.35	95	922.737	95	782.268	94.9	601.71	94.9	352.132	95	-89.7593	95	-90.0953	95	-61.2469
95.1	890.459	95.1	922.821	95.1	782.346	95	601.836	95	352.656	95.1	-89.4703	95.1	-90.1118	95.1	-61.2562
95.2	890.573	95.2	922.913	95.2	782.441	95.1	601.968	95.1	353.175	95.2	-89.15	95.2	-90.1414	95.2	-61.2632
95.3	890.685	95.3	922.98	95.3	782.53	95.2	602.089	95.2	353.668	95.3	-88.8297	95.3	-90.1703	95.3	-61.2632
95.4	890.78	95.4	923.073	95.4	782.612	95.3	602.2	95.3	354.171	95.4	-88.5289	95.4	-90.2281	95.4	-61.2632
95.5	890.886	95.5	923.159	95.5	782.717	95.4	602.334	95.4	354.675	95.5	-88.2203	95.5	-90.2625	95.5	-61.2828
95.6	890.998	95.6	923.246	95.6	782.843	95.5	602.45	95.5	355.18	95.6	-87.8906	95.6	-90.2946	95.6	-61.2906
95.7	891.087	95.7	923.351	95.7	782.936	95.6	602.577	95.6	355.659	95.7	-87.5718	95.7	-90.3453	95.7	-61.2906
95.8	891.187	95.8	923.465	95.8	783.042	95.7	602.711	95.7	356.093	95.8	-87.2758	95.8	-90.3813	95.8	-61.2992
95.9	891.279	95.9	923.57	95.9	783.123	95.8	602.859	95.8	356.555	95.9	-86.9774	95.9	-90.4109	95.9	-61.2899
96	891.37	96	923.679	96	783.23	95.9	602.969	95.9	357.027	96	-86.6531	96	-90.4235	96	-61.3148
96.1	891.486	96.1	923.785	96.1	783.315	96	603.096	96	357.495	96.1	-86.3656	96.1	-90.4594	96.1	-61.3375
96.2	891.585	96.2	923.882	96.2	783.402	96.1	603.211	96.1	357.933	96.2	-86.0477	96.2	-90.486	96.2	-61.3687
96.3	891.702	96.3	923.965	96.3	783.503	96.2	603.344	96.2	358.394	96.3	-85.732	96.3	-90.5086	96.3	-61.3929
96.4	891.815	96.4	924.081	96.4	783.577	96.3	603.484	96.3	358.84	96.4	-85.4351	96.4	-90.5524	96.4	-61.4437
96.5	891.903	96.5	924.176	96.5	783.632	96.4	603.589	96.4	359.268	96.5	-85.1063	96.5	-90.5758	96.5	-61.5015
96.6	892.007	96.6	924.284	96.6	783.686	96.5	603.698	96.5	359.746	96.6	-84.7945	96.6	-90.6031	96.6	-61.5328
96.7	892.107	96.7	924.419	96.7	783.725	96.6	603.837	96.6	360.219	96.7	-84.4813	96.7	-90.6469	96.7	-61.557
96.8	892.209	96.8	924.526	96.8	783.812	96.7	603.968	96.7	360.585	96.8	-84.1492	96.8	-90.6688	96.8	-61.5992
96.9	892.331	96.9	924.625	96.9	783.893	96.8	604.102	96.8	360.995	96.9	-83.8289	96.9	-90.6977	96.9	-61.6547
97	892.427	97	924.749	97	783.984	96.9	604.234	96.9	361.438	97	-83.4969	97	-90.7391	97	-61.7086
97.1	892.491	97.1	924.824	97.1	784.116	97	604.375	97	361.866	97.1	-83.1805	97.1	-90.7726	97.1	-61.7445
97.2	892.561	97.2	924.929	97.2	784.222	97.1	604.511	97.1	362.292	97.2	-82.8257	97.2	-90.8258	97.2	-61.8148
97.3	892.643	97.3	925.027	97.3	784.312	97.2	604.64	97.2	362.722	97.3	-82.4813	97.3	-90.868	97.3	-61.8656
97.4	892.724	97.4	925.128	97.4	784.416	97.3	604.77	97.3	363.148	97.4	-82.125	97.4	-90.9282	97.4	-61.8953
97.5	892.796	97.5	925.238	97.5	784.53	97.4	604.905	97.4	363.569	97.5	-81.7828	97.5	-90.9625	97.5	-61.9195
97.6	892.881	97.6	925.334	97.6	784.635	97.5	605.051	97.5	364.003	97.6	-81.4375	97.6	-90.9781	97.6	-61.9484
97.7	892.971	97.7	925.43	97.7	784.722	97.6	605.18	97.6	364.41	97.7	-81.1	97.7	-91.0016	97.7	-61.9898
97.8	893.068	97.8	925.498	97.8	784.807	97.7	605.3	97.7	364.848	97.8	-80.7773	97.8	-91.0125	97.8	-62.0132
97.9	893.151	97.9	925.594	97.9	784.909	97.8	605.409	97.8	365.248	97.9	-80.4383	97.9	-91.0094	97.9	-62.0484
98	893.248	98	925.698	98	784.987	97.9	605.54	97.9	365.668	98	-80.1063	98	-91.0203	98	-62.0687
98.1	893.35	98.1	925.777	98.1	785.07	98	605.655	98	366.061	98.1	-79.7719	98.1	-91.0493	98.1	-62.0789
98.2	893.44	98.2	925.844	98.2	785.152	98.1	605.747	98.1	366.438	98.2	-79.4453	98.2	-91.0758	98.2	-62.0961
98.3	893.576	98.3	925.952	98.3	785.237	98.2	605.87	98.2	366.843	98.3	-79.1226	98.3	-91.1149	98.3	-62.0992
98.4	893.667	98.4	926.05	98.4	785.32	98.3	605.988	98.3	367.246	98.4	-78.7945	98.4	-91.1696	98.4	-62.1469
98.5	893.772	98.5	926.128	98.5	785.436	98.4	606.094	98.4	367.651	98.5	-78.4695	98.5	-91.2368	98.5	-62.1695
98.6	893.884	98.6	926.223	98.6	785.516	98.5	606.203	98.5	368.055	98.6	-78.1336	98.6	-91.2977	98.6	-62.2133
98.7	893.995	98.7	926.32	98.7	785.616	98.6	606.308	98.6	368.457	98.7	-77.8211	98.7	-91.3696	98.7	-62.2593
98.8	894.112	98.8	926.434	98.8	785.737	98.7	606.43	98.7	368.855	98.8	-77.4648	98.8	-91.4461	98.8	-62.307
98.9	894.213	98.9	926.543	98.9	785.823	98.8	606.541	98.8	369.245	98.9	-77.0953	98.9	-91.5063	98.9	-62.3414
99	894.306	99	926.64	99	785.926	98.9	606.657	98.9	369.652	99	-76.7383	99	-91.5688	99	-62.3773
99.1	894.401	99.1	926.754	99.1	786.03	99	606.785	99	370.047	99.1	-76.3687	99.1	-91.6297	99.1	-62.4266
99.2	894.53	99.2	926.883	99.2	786.142	99.1	606.921	99.1	370.43	99.2	-75.993	99.2	-91.6782	99.2	-62.4554
99.3	894.67	99.3	927.023	99.3	786.254	99.2	607.038	99.2	370.819	99.3	-75.6172	99.3	-91.7703	99.3	-62.4867
99.4	894.777	99.4	927.12	99.4	786.377	99.3	607.14	99.3	371.202	99.4	-75.2625	99.4	-91.8071	99.4	-62.5211
99.5	894.901	99.5	927.215	99.5	786.499	99.4	607.239	99.4	371.591	99.5	-74.8984	99.5	-91.8875	99.5	-62.557
99.6	895.017	99.6	927.323	99.6	786.616	99.5	607.363	99.5	371.964	99.6	-74.5289	99.6	-91.9594	99.6	-62.5867
99.7	895.108	99.7	927.422	99.7	786.734	99.6	607.507	99.6	372.355	99.7	-74.1727	99.7	-91.986	99.7	-62.5961
99.8	895.245	99.8	927.543	99.8	786.846	99.7	607.633	99.7	372.71	99.8	-73.8086	99.8	-92.0297	99.8	-62.6258
99.9	895.357	99.9	927.645	99.9	786.936	99.8	607.769	99.8	373.081	99.9	-73.4414	99.9	-92.0953	99.9	-62.6429
100	895.491	100	927.73	100	787.055	99.9	607.917	99.9	373.454	100	-73.075	100	-92.1297	100	-62.6664
100.1	895.623	100.1	927.836	100.1	787.147	100	608.009	100	373.823	100.1	-72.7039	100.1	-92.1852	100.1	-62.7007
100.2	895.716	100.2	927.936	100.2	787.256	100.1	608.133	100.1	374.17	100.2	-72.3445	100.2	-92.2164	100.2	-62.725
100.3	895.834	100.3	928.036	100.3	787.347	100.2	608.245	100.2	374.527	100.3	-71.9922	100.3	-92.2485	100.3	-62.7554
100.4	895.935	100.4	928.156	100.4	787.475	100.3	608.34	100.3	374.906	100.4	-71.6094	100.4	-92.282	100.4	-62.7586
100.5	896.058	100.5	928.241	100.5	787.558	100.4	608.473	100.4	375.284	100.5	-71.2203	100.5	-92.282	100.5	-62.7992
100.6	896.166	100.6	928.339	100.6	787.62	100.5	608.605	100.5	375.629	100.6	-70.8516	100.6	-92.2993	100.6	-62.825
100.7	896.268	100.7	928.445	100.7	787.722	100.6	608.703	100.6	375.984	100.7	-70.4656	100.7	-92.3602	100.7	-62.8703
100.8	896.362	100.8	928.534	100.8	787.795	100.7	608.816	100.7	376.351	100.8	-70.082	100.8	-92.4282	100.8	-62.9266
100.9	896.452	100.9	928.637	100.9	787.873	100.8	608.938	100.8	376.699	100.9	-69.6797	100.9	-92.4781	100.9	-62.9586
101	896.568	101	928.761	101	787.965	100.9	609.038	100.9	377.054	101	-69.2859	101	-92.5203	101	-62.9867
101.1	896.648	101.1	928.859	101.1	788.038	101	609.179	101	377.41	101.1	-68.907	101.1	-92.5446	101.1	-63.0211
101.2	896.752	101.2	928.956	101.2	788.143	101.1	609.29	101.1	377.753	101.2	-68.5234	101.2	-92.6	101.2	-63.0718
101.3	896.823	101.3	929.035	101.3	788.241	101.2	609.381	101.2	378.105	101.3	-68.1359	101.3	-92.6102	101.3	-63.1086
101.4	896.947	101.4	929.125	101.4	788.342	101.3	609.489	101.3	378.457	101.4	-67.732	101.4	-92.686	101.4	-63.1766
101.5	897.1	101.5	929.215	101.5	788.426	101.4	609.613	101.4	378.815	101.5	-67.3469	101.5	-92.7633	101.5	-63.2219
101.6	897.241	101.6	929.3	101.6	788.511	101.5	609.705	101.5	379.164	101.6	-66.9656	101.6	-92.7742	101.6	-63.2664
101.7	897.354	101.7	929.39	101.7	788.635	101.6	609.805	101.6	379.531	101.7	-66.5898	101.7	-92.7672	101.7	-63.2992
101.8	897.432	101.8	929.484	101.8	788.725	101.7	609.902	101.7	379.872	101.8	-66.2156	101.8	-92.736	101.8	-63.3094
101.9	897.537	101.9	929.594	101.9	788.827	101.8	610.031	101.8	380.202	101.9	-65.8484	101.9	-92.7586	101.9	-63.3461
102	897.648	102	929.691	102	788.921	101.9	610.164	101.9	380.562	102	-65.4727	102	-92.8024	102	-63.3922
102.1	897.709	102.1	929.761	102.1	789.034	102	610.242	102	380.918	102.1	-65.0938	102.1	-92.8219	102.1	-63.4234
102.2	897.76	102.2	929.855	102.2	789.143	102.1	610.39	102.1	381.297	102.2	-64.7109	102.2	-92.8531	102.2	-63.4703
102.3	897.831	102.3	929.941	102.3	789.234	102.2	610.465	102.2	381.656	102.3	-64.3406	102.3	-92.8922	102.3	-63.5015
102.4	897.909	102.4	930.05	102.4	789.315	102.3	610.628	102.3	381.984	102.4	-63.9406	102.4	-92.9203	102.4	-63.5289
102.5	898.005	102.5	930.12	102.5	789.385	102.4	610.813	102.4	382.355	102.5	-63.5477	102.5	-92.986	102.5	-63.5648
102.6	898.1	102.6	930.203	102.6	789.48	102.5	610.941	102.5	382.705	102.6	-63.1594	102.6	-93.0328	102.6	-63.6031
102.7	898.175	102.7	930.293	102.7	789.566	102.6	611.058	102.6	383.059	102.7	-62.7586	102.7	-93.111	102.7	-63.6273
102.8	898.255	102.8	930.402	102.8	789.63	102.7	611.187	102.7	383.413	102.8	-62.332	102.8	-93.1625	102.8	-63.657
102.9	898.366	102.9	930.488	102.9	789.727	102.8	611.266	102.8	383.741	102.9	-61.9211	102.9	-93.1969	102.9	-63.6937
103	898.515	103	930.555	103	789.827	102.9	611.375	102.9	384.089	103	-61.5039	103	-93.243	103	-63.7398
103.1	898.654	103.1	930.645	103.1	789.929	103	611.46	103	384.45	103.1	-61.0828	103.1	-93.275	103.1	-63.7679
103.2	898.773	103.2	930.722	103.2	790.03	103.1	611.558	103.1	384.784	103.2	-60.6203	103.2	-93.3383	103.2	-63.8094
103.3	898.916	103.3	930.793	103.3	790.116	103.2	611.641	103.2	385.117	103.3	-60.2734	103.3	-93.4031	103.3	-63.8383
103.4	898.987	103.4	930.909	103.4	790.213	103.3	611.754	103.3	385.441	103.4	-59.9094	103.4	-93.4274	103.4	-63.8726
103.5	899.068	103.5	931.011	103.5	790.32	103.4	611.855	103.4	385.781	103.5	-59.543	103.5	-93.4586	103.5	-63.8648
103.6	899.159	103.6	931.12	103.6	790.413	103.5	611.973	103.5	386.086	103.6	-59.1102	103.6	-93.4938	103.6	-63.8922
103.7	899.296	103.7	931.219	103.7	790.495	103.6	612.065	103.6	386.39	103.7	-58.6758	103.7	-93.5563	103.7	-63.8969
103.8	899.408	103.8	931.295	103.8	790.562	103.7	612.16	103.7	386.715	103.8	-58.2617	103.8	-93.568	103.8	-63.9117
103.9	899.478	103.9	931.355	103.9	790.652	103.8	612.27	103.8	387.031	103.9	-57.8477	103.9	-93.6297	103.9	-63.9461
104	899.553	104	931.445	104	790.717	103.9	612.368	103.9	387.355	104	-57.4141	104	-93.6852	104	-63.9554
104.1	899.623	104.1	931.55	104.1	790.773	104	612.475	104	387.656	104.1	-56.9914	104.1	-93.7289	104.1	-63.9578
104.2	899.69	104.2	931.632	104.2	790.846	104.1	612.563	104.1	387.938	104.2	-56.6063	104.2	-93.7899	104.2	-63.975
104.3	899.772	104.3	931.749	104.3	790.902	104.2	612.669	104.2	388.222	104.3	-56.1945	104.3	-93.85	104.3	-63.9984
104.4	899.884	104.4	931.848	104.4	790.967	104.3	612.764	104.3	388.496	104.4	-55.7656	104.4	-93.8914	104.4	-64.0132
104.5	899.976	104.5	931.933	104.5	791.003	104.4	612.84	104.4	388.795	104.5	-55.3555	104.5	-93.9399	104.5	-64.025
104.6	900.065	104.6	932.019	104.6	791.034	104.5	612.934	104.5	389.105	104.6	-54.9375	104.6	-93.9695	104.6	-64.0765
104.7	900.138	104.7	932.113	104.7	791.101	104.6	613.023	104.6	389.402	104.7	-54.5226	104.7	-94.0172	104.7	-64.1031
104.8	900.202	104.8	932.211	104.8	791.163	104.7	613.097	104.7	389.684	104.8	-54.0859	104.8	-94.0563	104.8	-64.1297
104.9	900.287	104.9	932.324	104.9	791.23	104.8	613.188	104.8	389.977	104.9	-53.6602	104.9	-94.1102	104.9	-64.1539
105	900.389	105	932.402	105	791.295	104.9	613.269	104.9	390.281	105	-53.1992	105	-94.1539	105	-64.1664
105.1	900.507	105.1	932.472	105.1	791.331	105	613.332	105	390.581	105.1	-52.7797	105.1	-94.1899	105.1	-64.2047
105.2	900.615	105.2	932.582	105.2	791.409	105.1	613.453	105.1	390.887	105.2	-52.3164	105.2	-94.2508	105.2	-64.232
105.3	900.718	105.3	932.676	105.3	791.526	105.2	613.577	105.2	391.207	105.3	-51.8625	105.3	-94.275	105.3	-64.275
105.4	900.819	105.4	932.761	105.4	791.655	105.3	613.706	105.3	391.527	105.4	-51.4109	105.4	-94.311	105.4	-64.2828
105.5	900.916	105.5	932.859	105.5	791.741	105.4	613.837	105.4	391.823	105.5	-50.9789	105.5	-94.3375	105.5	-64.2992
105.6	901.01	105.6	932.945	105.6	791.854	105.5	613.948	105.5	392.117	105.6	-50.5359	105.6	-94.3984	105.6	-64.3172
105.7	901.12	105.7	933.016	105.7	791.968	105.6	614.074	105.6	392.401	105.7	-50.0804	105.7	-94.4399	105.7	-64.2992
105.8	901.245	105.8	933.116	105.8	792.086	105.7	614.198	105.7	392.668	105.8	-49.6094	105.8	-94.4891	105.8	-64.3218
105.9	901.373	105.9	933.195	105.9	792.198	105.8	614.301	105.8	392.964	105.9	-49.1625	105.9	-94.5297	105.9	-64.3336
106	901.474	106	933.285	106	792.261	105.9	614.414	105.9	393.227	106	-48.6875	106	-94.5641	106	-64.3414
106.1	901.604	106.1	933.39	106.1	792.339	106	614.516	106	393.53	106.1	-48.2695	106.1	-94.6024	106.1	-64.3656
106.2	901.714	106.2	933.491	106.2	792.416	106.1	614.609	106.1	393.797	106.2	-47.7961	106.2	-94.6297	106.2	-64.3726
106.3	901.826	106.3	933.574	106.3	792.491	106.2	614.706	106.2	394.07	106.3	-47.3422	106.3	-94.6625	106.3	-64.3961
106.4	901.92	106.4	933.659	106.4	792.565	106.3	614.813	106.3	394.352	106.4	-46.8984	106.4	-94.7117	106.4	-64.4195
106.5	902.025	106.5	933.746	106.5	792.628	106.4	614.922	106.4	394.608	106.5	-46.4562	106.5	-94.7641	106.5	-64.4398
106.6	902.124	106.6	933.831	106.6	792.694	106.5	615.016	106.5	394.863	106.6	-45.9953	106.6	-94.8328	106.6	-64.4742
106.7	902.252	106.7	933.934	106.7	792.754	106.6	615.125	106.6	395.12	106.7	-45.5313	106.7	-94.8891	106.7	-64.5015
106.8	902.345	106.8	934.038	106.8	792.834	106.7	615.238	106.7	395.402	106.8	-45.0656	106.8	-94.9734	106.8	-64.5406
106.9	902.428	106.9	934.128	106.9	792.909	106.8	615.347	106.8	395.676	106.9	-44.6406	106.9	-95.0055	106.9	-64.5523
107	902.519	107	934.242	107	793.006	106.9	615.438	106.9	395.921	107	-44.1867	107	-95.0953	107	-64.6
107.1	902.587	107.1	934.339	107.1	793.104	107	615.55	107	396.195	107.1	-43.7406	107.1	-95.1852	107.1	-64.6148
107.2	902.647	107.2	934.465	107.2	793.184	107.1	615.633	107.1	396.465	107.2	-43.2734	107.2	-95.2438	107.2	-64.6226
107.3	902.764	107.3	934.57	107.3	793.276	107.2	615.715	107.2	396.741	107.3	-42.8273	107.3	-95.3258	107.3	-64.6617
107.4	902.862	107.4	934.684	107.4	793.37	107.3	615.793	107.3	397.011	107.4	-42.3703	107.4	-95.4156	107.4	-64.6929
107.5	902.952	107.5	934.808	107.5	793.463	107.4	615.87	107.4	397.259	107.5	-41.8976	107.5	-95.4938	107.5	-64.7125
107.6	903.044	107.6	934.926	107.6	793.547	107.5	615.937	107.5	397.542	107.6	-41.4289	107.6	-95.5485	107.6	-64.7125
107.7	903.12	107.7	935.035	107.7	793.666	107.6	616.009	107.6	397.785	107.7	-40.9875	107.7	-95.5797	107.7	-64.7125
107.8	903.226	107.8	935.135	107.8	793.769	107.7	616.084	107.7	398.055	107.8	-40.5305	107.8	-95.6336	107.8	-64.7437
107.9	903.35	107.9	935.234	107.9	793.846	107.8	616.172	107.8	398.312	107.9	-40.0531	107.9	-95.6735	107.9	-64.7437
108	903.459	108	935.352	108	793.936	107.9	616.25	107.9	398.57	108	-39.5773	108	-95.743	108	-64.7679
108.1	903.51	108.1	935.465	108.1	794.016	108	616.332	108	398.816	108.1	-39.1211	108.1	-95.7602	108.1	-64.7977
108.2	903.6	108.2	935.565	108.2	794.101	108.1	616.395	108.1	399.055	108.2	-38.6516	108.2	-95.8016	108.2	-64.8461
108.3	903.685	108.3	935.652	108.3	794.174	108.2	616.495	108.2	399.273	108.3	-38.1672	108.3	-95.8211	108.3	-64.889
108.4	903.76	108.4	935.738	108.4	794.261	108.3	616.579	108.3	399.578	108.4	-37.718	108.4	-95.8618	108.4	-64.907
108.5	903.858	108.5	935.848	108.5	794.331	108.4	616.659	108.4	399.877	108.5	-37.2492	108.5	-95.8719	108.5	-64.9351
108.6	903.937	108.6	935.96	108.6	794.429	108.5	616.762	108.5	400.137	108.6	-36.7687	108.6	-95.9078	108.6	-64.9476
108.7	904.005	108.7	936.047	108.7	794.526	108.6	616.859	108.6	400.387	108.7	-36.2953	108.7	-95.9617	108.7	-64.9937
108.8	904.066	108.8	936.147	108.8	794.604	108.7	616.966	108.7	400.664	108.8	-35.7883	108.8	-95.9977	108.8	-65.0328
108.9	904.158	108.9	936.246	108.9	794.674	108.8	617.055	108.8	400.96	108.9	-35.3	108.9	-96.0172	108.9	-65.0601
109	904.26	109	936.324	109	794.754	108.9	617.14	108.9	401.215	109	-34.8469	109	-96.0172	109	-65.1078
109.1	904.365	109.1	936.409	109.1	794.827	109	617.238	109	401.477	109.1	-34.3734	109.1	-96.0563	109.1	-65.1492
109.2	904.484	109.2	936.504	109.2	794.885	109.1	617.356	109.1	401.725	109.2	-33.8828	109.2	-96.0914	109.2	-65.1469
109.3	904.561	109.3	936.581	109.3	794.965	109.2	617.48	109.2	401.957	109.3	-33.4437	109.3	-96.1336	109.3	-65.1265
109.4	904.663	109.4	936.674	109.4	795.042	109.3	617.563	109.3	402.171	109.4	-32.9766	109.4	-96.1891	109.4	-65.1031
109.5	904.76	109.5	936.754	109.5	795.135	109.4	617.664	109.4	402.399	109.5	-32.4789	109.5	-96.2086	109.5	-65.1063
109.6	904.862	109.6	936.839	109.6	795.21	109.5	617.757	109.5	402.652	109.6	-32.014	109.6	-96.2594	109.6	-65.1304
109.7	904.963	109.7	936.914	109.7	795.276	109.6	617.844	109.6	402.882	109.7	-31.5664	109.7	-96.3016	109.7	-65.1461
109.8	905.076	109.8	937.011	109.8	795.347	109.7	617.941	109.7	403.12	109.8	-31.0765	109.8	-96.318	109.8	-65.1343
109.9	905.206	109.9	937.05	109.9	795.409	109.8	618.043	109.8	403.36	109.9	-30.6125	109.9	-96.3406	109.9	-65.1273
110	905.303	110	937.094	110	795.48	109.9	618.172	109.9	403.589	110	-30.1469	110	-96.393	110	-65.1343
110.1	905.401	110.1	937.164	110.1	795.562	110	618.281	110	403.816	110.1	-29.6711	110.1	-96.418	110.1	-65.1109
110.2	905.478	110.2	937.269	110.2	795.608	110.1	618.371	110.1	404.05	110.2	-29.1859	110.2	-96.4547	110.2	-65.1343
110.3	905.553	110.3	937.339	110.3	795.691	110.2	618.473	110.2	404.288	110.3	-28.7148	110.3	-96.5102	110.3	-65.1664
110.4	905.655	110.4	937.414	110.4	795.764	110.3	618.543	110.3	404.501	110.4	-28.2242	110.4	-96.5195	110.4	-65.1929
110.5	905.728	110.5	937.48	110.5	795.847	110.4	618.664	110.4	404.717	110.5	-27.7656	110.5	-96.5367	110.5	-65.2086
110.6	905.811	110.6	937.543	110.6	795.924	110.5	618.772	110.5	404.934	110.6	-27.2914	110.6	-96.5758	110.6	-65.389
110.7	905.897	110.7	937.589	110.7	795.984	110.6	618.856	110.6	405.132	110.7	-26.7922	110.7	-96.6102	110.7	-65.5164
110.8	906.015	110.8	937.664	110.8	796.057	110.7	618.968	110.7	405.336	110.8	-26.2945	110.8	-96.6461	110.8	-65.6031
110.9	906.112	110.9	937.777	110.9	796.143	110.8	619.077	110.8	405.555	110.9	-25.8265	110.9	-96.6852	110.9	-65.4672
111	906.185	111	937.87	111	796.23	110.9	619.169	110.9	405.758	111	-25.3383	111	-96.768	111	-65.4625
111.1	906.277	111.1	937.941	111.1	796.339	111	619.254	111	405.975	111.1	-24.843	111.1	-96.8406	111.1	-65.4742
111.2	906.384	111.2	938.048	111.2	796.433	111.1	619.339	111.1	406.208	111.2	-24.35	111.2	-96.9008	111.2	-65.525
111.3	906.471	111.3	938.12	111.3	796.526	111.2	619.402	111.2	406.441	111.3	-23.8547	111.3	-96.9469	111.3	-65.564
111.4	906.553	111.4	938.205	111.4	796.589	111.3	619.515	111.3	406.668	111.4	-23.3695	111.4	-96.9883	111.4	-65.5906
111.5	906.636	111.5	938.293	111.5	796.671	111.4	619.633	111.4	406.902	111.5	-22.8773	111.5	-97.0414	111.5	-65.5812
111.6	906.752	111.6	938.375	111.6	796.749	111.5	619.727	111.5	407.12	111.6	-22.3695	111.6	-97.1102	111.6	-65.6148
111.7	906.862	111.7	938.46	111.7	796.827	111.6	619.808	111.6	407.367	111.7	-21.8773	111.7	-97.1821	111.7	-65.6297
111.8	906.944	111.8	938.535	111.8	796.909	111.7	619.895	111.7	407.586	111.8	-21.3898	111.8	-97.1953	111.8	-65.639
111.9	906.991	111.9	938.601	111.9	797.006	111.8	619.968	111.8	407.82	111.9	-20.9086	111.9	-97.225	111.9	-65.6297
112	907.093	112	938.684	112	797.055	111.9	620.043	111.9	408.038	112	-20.3969	112	-97.3344	112	-65.6343
112.1	907.194	112.1	938.777	112.1	797.116	112	620.121	112	408.266	112.1	-19.918	112.1	-97.4352	112.1	-65.6422
112.2	907.294	112.2	938.883	112.2	797.171	112.1	620.198	112.1	408.484	112.2	-19.4351	112.2	-97.5524	112.2	-65.6586
112.3	907.381	112.3	938.948	112.3	797.225	112.2	620.281	112.2	408.703	112.3	-18.9515	112.3	-97.6336	112.3	-65.6766
112.4	907.479	112.4	939.035	112.4	797.288	112.3	620.359	112.3	408.929	112.4	-18.4641	112.4	-97.7164	112.4	-65.6703
112.5	907.6	112.5	939.089	112.5	797.37	112.4	620.43	112.4	409.164	112.5	-17.9828	112.5	-97.7672	112.5	-65.6851
112.6	907.685	112.6	939.184	112.6	797.405	112.5	620.512	112.5	409.375	112.6	-17.4515	112.6	-97.8211	112.6	-65.7125
112.7	907.757	112.7	939.276	112.7	797.468	112.6	620.586	112.6	409.562	112.7	-16.9547	112.7	-97.8844	112.7	-65.7437
112.8	907.842	112.8	939.332	112.8	797.534	112.7	620.648	112.7	409.742	112.8	-16.4641	112.8	-97.9321	112.8	-65.7664
112.9	907.923	112.9	939.434	112.9	797.628	112.8	620.711	112.8	409.948	112.9	-15.9789	112.9	-97.993	112.9	-65.8023
113	908.041	113	939.519	113	797.702	112.9	620.796	112.9	410.149	113	-15.4953	113	-98.0367	113	-65.8101
113.1	908.128	113.1	939.609	113.1	797.764	113	620.895	113	410.355	113.1	-15.0172	113.1	-98.1102	113.1	-65.8383
113.2	908.209	113.2	939.672	113.2	797.87	113.1	620.984	113.1	410.562	113.2	-14.5023	113.2	-98.1578	113.2	-65.8602
113.3	908.28	113.3	939.766	113.3	797.968	113.2	621.063	113.2	410.73	113.3	-13.9984	113.3	-98.1922	113.3	-65.8922
113.4	908.362	113.4	939.851	113.4	798.045	113.3	621.164	113.3	410.911	113.4	-13.475	113.4	-98.2047	113.4	-65.9164
113.5	908.432	113.5	939.898	113.5	798.128	113.4	621.269	113.4	411.101	113.5	-12.9484	113.5	-98.2555	113.5	-65.975
113.6	908.491	113.6	939.984	113.6	798.213	113.5	621.352	113.5	411.32	113.6	-12.4273	113.6	-98.3016	113.6	-66.0281
113.7	908.576	113.7	940.035	113.7	798.316	113.6	621.434	113.6	411.523	113.7	-11.9398	113.7	-98.3375	113.7	-66.0367
113.8	908.655	113.8	940.101	113.8	798.417	113.7	621.511	113.7	411.738	113.8	-11.4367	113.8	-98.3719	113.8	-66.0445
113.9	908.741	113.9	940.191	113.9	798.507	113.8	621.594	113.8	411.973	113.9	-10.939	113.9	-98.4203	113.9	-66.0672
114	908.838	114	940.269	114	798.577	113.9	621.698	113.9	412.184	114	-10.4047	114	-98.4781	114	-66.1008
114.1	908.952	114.1	940.344	114.1	798.679	114	621.781	114	412.395	114.1	-9.85699	114.1	-98.5563	114.1	-66.1492
114.2	909.041	114.2	940.414	114.2	798.788	114.1	621.844	114.1	412.598	114.2	-9.34216	114.2	-98.6141	114.2	-66.1812
114.3	909.131	114.3	940.495	114.3	798.893	114.2	621.922	114.2	412.769	114.3	-8.8078	114.3	-98.6656	114.3	-66.2125
114.4	909.224	114.4	940.579	114.4	798.977	114.3	622.004	114.3	412.989	114.4	-8.31793	114.4	-98.7313	114.4	-66.232
114.5	909.327	114.5	940.659	114.5	799.057	114.4	622.058	114.4	413.218	114.5	-7.82733	114.5	-98.7914	114.5	-66.232
114.6	909.452	114.6	940.777	114.6	799.159	114.5	622.082	114.5	413.434	114.6	-7.32965	114.6	-98.8492	114.6	-66.2406
114.7	909.561	114.7	940.868	114.7	799.261	114.6	622.145	114.6	413.637	114.7	-6.7984	114.7	-98.9031	114.7	-66.2391
114.8	909.654	114.8	940.98	114.8	799.338	114.7	622.218	114.7	413.839	114.8	-6.24451	114.8	-98.9391	114.8	-66.2601
114.9	909.748	114.9	941.081	114.9	799.409	114.8	622.301	114.8	414.043	114.9	-5.69684	114.9	-98.9813	114.9	-66.2664
115	909.862	115	941.157	115	799.506	114.9	622.383	114.9	414.21	115	-5.16718	115	-99.0336	115	-66.2758
115.1	909.944	115.1	941.23	115.1	799.584	115	622.473	115	414.399	115.1	-4.63824	115.1	-99.0633	115.1	-66.275
115.2	910.038	115.2	941.308	115.2	799.667	115.1	622.594	115.1	414.601	115.2	-4.12811	115.2	-99.0797	115.2	-66.2703
115.3	910.143	115.3	941.383	115.3	799.734	115.2	622.691	115.2	414.805	115.3	-3.53595	115.3	-99.0945	115.3	-66.2828
115.4	910.241	115.4	941.473	115.4	799.807	115.3	622.786	115.3	415.011	115.4	-3.03827	115.4	-99.1336	115.4	-66.2914
115.5	910.331	115.5	941.589	115.5	799.866	115.4	622.862	115.4	415.176	115.5	-2.53595	115.5	-99.1774	115.5	-66.282
115.6	910.396	115.6	941.659	115.6	799.933	115.5	622.961	115.5	415.339	115.6	-2.03046	115.6	-99.2281	115.6	-66.275
115.7	910.484	115.7	941.75	115.7	799.975	115.6	623.063	115.6	415.512	115.7	-1.51642	115.7	-99.2594	115.7	-66.2867
115.8	910.584	115.8	941.855	115.8	800.03	115.7	623.152	115.7	415.715	115.8	-0.991394	115.8	-99.3055	115.8	-66.2977
115.9	910.675	115.9	941.929	115.9	800.096	115.8	623.227	115.8	415.89	115.9	-0.458557	115.9	-99.3524	115.9	-66.307
116	910.787	116	942.012	116	800.164	115.9	623.303	115.9	416.074	116	0.0492554	116	-99.3735	116	-66.3062
116.1	910.87	116.1	942.136	116.1	800.22	116	623.364	116	416.273	116.1	0.575806	116.1	-99.407	116.1	-66.314
116.2	910.964	116.2	942.25	116.2	800.28	116.1	623.434	116.1	416.465	116.2	1.10004	116.2	-99.4539	116.2	-66.3094
116.3	911.069	116.3	942.332	116.3	800.339	116.2	623.492	116.2	416.652	116.3	1.61487	116.3	-99.5219	116.3	-66.3265
116.4	911.173	116.4	942.406	116.4	800.397	116.3	623.563	116.3	416.832	116.4	2.14612	116.4	-99.575	116.4	-66.3257
116.5	911.273	116.5	942.48	116.5	800.46	116.4	623.631	116.4	417.043	116.5	2.66174	116.5	-99.6188	116.5	-66.3289
116.6	911.37	116.6	942.574	116.6	800.511	116.5	623.723	116.5	417.238	116.6	3.19452	116.6	-99.6649	116.6	-66.3304
116.7	911.479	116.7	942.686	116.7	800.565	116.6	623.793	116.6	417.434	116.7	3.71954	116.7	-99.7234	116.7	-66.3406
116.8	911.564	116.8	942.786	116.8	800.632	116.7	623.876	116.7	417.649	116.8	4.22894	116.8	-99.7672	116.8	-66.35
116.9	911.651	116.9	942.878	116.9	800.691	116.8	623.952	116.8	417.831	116.9	4.74847	116.9	-99.818	116.9	-66.3445
117	911.757	117	942.973	117	800.745	116.9	624.016	116.9	418.023	117	5.25549	117	-99.8719	117	-66.3453
117.1	911.831	117.1	943.074	117.1	800.803	117	624.089	117	418.23	117.1	5.77112	117.1	-99.9243	117.1	-66.357
117.2	911.94	117.2	943.155	117.2	800.855	117.1	624.177	117.1	418.421	117.2	6.30316	117.2	-99.9734	117.2	-66.3016
117.3	912.021	117.3	943.259	117.3	800.885	117.2	624.242	117.2	418.61	117.3	6.84296	117.3	-100.001	117.3	-66.2914
117.4	912.076	117.4	943.385	117.4	800.933	117.3	624.334	117.3	418.8	117.4	7.36487	117.4	-100.063	117.4	-66.2977
117.5	912.163	117.5	943.453	117.5	800.987	117.4	624.407	117.4	418.992	117.5	7.88129	117.5	-100.131	117.5	-66.3344
117.6	912.241	117.6	943.548	117.6	801.045	117.5	624.488	117.5	419.156	117.6	8.40393	117.6	-100.145	117.6	-66.3531
117.7	912.318	117.7	943.64	117.7	801.128	117.6	624.531	117.6	419.344	117.7	8.93988	117.7	-100.177	117.7	-66.3687
117.8	912.374	117.8	943.713	117.8	801.21	117.7	624.613	117.7	419.534	117.8	9.46252	117.8	-100.216	117.8	-66.4039
117.9	912.471	117.9	943.793	117.9	801.261	117.8	624.684	117.8	419.708	117.9	10.0063	117.9	-100.243	117.9	-66.4047
118	912.548	118	943.878	118	801.334	117.9	624.762	117.9	419.898	118	10.5375	118	-100.291	118	-66.4266
118.1	912.62	118.1	943.969	118.1	801.406	118	624.863	118	420.094	118.1	11.0883	118.1	-100.263	118.1	-66.4429
118.2	912.702	118.2	944.045	118.2	801.475	118.1	624.948	118.1	420.273	118.2	11.6196	118.2	-100.27	118.2	-66.4789
118.3	912.775	118.3	944.113	118.3	801.562	118.2	625.023	118.2	420.465	118.3	12.1266	118.3	-100.284	118.3	-66.5054
118.4	912.87	118.4	944.164	118.4	801.652	118.3	625.133	118.3	420.652	118.4	12.65	118.4	-100.322	118.4	-66.525
118.5	912.979	118.5	944.234	118.5	801.72	118.4	625.206	118.4	420.809	118.5	13.186	118.5	-100.348	118.5	-66.5445
118.6	913.049	118.6	944.303	118.6	801.805	118.5	625.273	118.5	420.975	118.6	13.7321	118.6	-100.408	118.6	-66.564
118.7	913.144	118.7	944.363	118.7	801.859	118.6	625.359	118.6	421.149	118.7	14.2336	118.7	-100.454	118.7	-66.5867
118.8	913.248	118.8	944.441	118.8	801.928	118.7	625.461	118.7	421.32	118.8	14.7516	118.8	-100.502	118.8	-66.6148
118.9	913.342	118.9	944.535	118.9	801.999	118.8	625.531	118.8	421.477	118.9	15.2726	118.9	-100.548	118.9	-66.6469
119	913.416	119	944.605	119	802.065	118.9	625.625	118.9	421.62	119	15.7633	119	-100.607	119	-66.6688
119.1	913.515	119.1	944.683	119.1	802.12	119	625.718	119	421.785	119.1	16.2719	119.1	-100.638	119.1	-66.6859
119.2	913.6	119.2	944.777	119.2	802.191	119.1	625.805	119.1	421.938	119.2	16.7711	119.2	-100.688	119.2	-66.7242
119.3	913.709	119.3	944.863	119.3	802.249	119.2	625.883	119.2	422.105	119.3	17.2875	119.3	-100.723	119.3	-66.7391
119.4	913.806	119.4	944.909	119.4	802.315	119.3	625.956	119.3	422.273	119.4	17.7914	119.4	-100.802	119.4	-66.7484
119.5	913.889	119.5	944.98	119.5	802.373	119.4	626.034	119.4	422.421	119.5	18.3032	119.5	-100.849	119.5	-66.7711
119.6	913.984	119.6	945.038	119.6	802.429	119.5	626.109	119.5	422.57	119.6	18.8578	119.6	-100.891	119.6	-66.7977
119.7	914.084	119.7	945.091	119.7	802.468	119.6	626.216	119.6	422.7	119.7	19.3883	119.7	-100.939	119.7	-66.7906
119.8	914.143	119.8	945.152	119.8	802.53	119.7	626.308	119.7	422.859	119.8	19.9367	119.8	-100.981	119.8	-66.7906
119.9	914.228	119.9	945.222	119.9	802.57	119.8	626.383	119.8	423.019	119.9	20.4797	119.9	-101.053	119.9	-66.7992
120	914.319	120	945.285	120	802.647	119.9	626.476	119.9	423.164	120	21.0258	120	-101.119	120	-66.814
120.1	914.404	120.1	945.363	120.1	802.706	120	626.544	120	423.309	120.1	21.5766	120.1	-101.196	120.1	-66.8211
120.2	914.479	120.2	945.429	120.2	802.788	120.1	626.602	120.1	423.452	120.2	22.1235	120.2	-101.216	120.2	-66.8336
120.3	914.581	120.3	945.523	120.3	802.839	120.2	626.667	120.2	423.605	120.3	22.6547	120.3	-101.258	120.3	-66.8257
120.4	914.677	120.4	945.601	120.4	802.893	120.3	626.762	120.3	423.722	120.4	23.186	120.4	-101.287	120.4	-66.8414
120.5	914.734	120.5	945.671	120.5	802.948	120.4	626.856	120.4	423.875	120.5	23.7368	120.5	-101.298	120.5	-66.8726
120.6	914.823	120.6	945.749	120.6	803.038	120.5	626.944	120.5	424.023	120.6	24.2641	120.6	-101.306	120.6	-66.8843
120.7	914.881	120.7	945.832	120.7	803.123	120.6	627.016	120.6	424.176	120.7	24.8	120.7	-101.352	120.7	-66.9109
120.8	914.935	120.8	945.934	120.8	803.218	120.7	627.094	120.7	424.331	120.8	25.3219	120.8	-101.388	120.8	-66.9312
120.9	915.023	120.9	946.004	120.9	803.296	120.8	627.16	120.8	424.48	120.9	25.8461	120.9	-101.42	120.9	-66.9672
121	915.108	121	946.089	121	803.387	120.9	627.242	120.9	424.618	121	26.3422	121	-101.442	121	-67.0008
121.1	915.182	121.1	946.159	121.1	803.451	121	627.327	121	424.781	121.1	26.8898	121.1	-101.493	121.1	-67.0445
121.2	915.252	121.2	946.223	121.2	803.527	121.1	627.419	121.1	424.934	121.2	27.4156	121.2	-101.537	121.2	-67.064
121.3	915.331	121.3	946.285	121.3	803.577	121.2	627.507	121.2	425.113	121.3	27.9641	121.3	-101.561	121.3	-67.0883
121.4	915.42	121.4	946.359	121.4	803.656	121.3	627.613	121.3	425.261	121.4	28.5219	121.4	-101.609	121.4	-67.1031
121.5	915.518	121.5	946.453	121.5	803.733	121.4	627.667	121.4	425.414	121.5	29.0578	121.5	-101.651	121.5	-67.1297
121.6	915.592	121.6	946.543	121.6	803.795	121.5	627.727	121.5	425.563	121.6	29.5773	121.6	-101.688	121.6	-67.1539
121.7	915.659	121.7	946.623	121.7	803.836	121.6	627.785	121.6	425.73	121.7	30.1071	121.7	-101.748	121.7	-67.1617
121.8	915.752	121.8	946.696	121.8	803.885	121.7	627.854	121.7	425.875	121.8	30.6398	121.8	-101.806	121.8	-67.1734
121.9	915.845	121.9	946.769	121.9	803.944	121.8	627.934	121.8	426.004	121.9	31.1625	121.9	-101.849	121.9	-67.1898
122	915.937	122	946.855	122	803.987	121.9	628.004	121.9	426.179	122	31.6899	122	-101.876	122	-67.2047
122.1	916.002	122.1	946.909	122.1	804.05	122	628.066	122	426.344	122.1	32.2446	122.1	-101.903	122.1	-67.1961
122.2	916.092	122.2	946.98	122.2	804.116	122.1	628.133	122.1	426.52	122.2	32.7797	122.2	-101.951	122.2	-67.1578
122.3	916.185	122.3	947.043	122.3	804.164	122.2	628.188	122.2	426.674	122.3	33.3156	122.3	-101.998	122.3	-67.1531
122.4	916.26	122.4	947.145	122.4	804.241	122.3	628.257	122.3	426.821	122.4	33.8391	122.4	-102.044	122.4	-67.1422
122.5	916.316	122.5	947.23	122.5	804.318	122.4	628.305	122.4	426.98	122.5	34.3618	122.5	-102.08	122.5	-67.1422
122.6	916.377	122.6	947.313	122.6	804.383	122.5	628.363	122.5	427.133	122.6	34.8735	122.6	-102.114	122.6	-67.0664
122.7	916.44	122.7	947.375	122.7	804.472	122.6	628.425	122.6	427.249	122.7	35.3976	122.7	-102.177	122.7	-67.1078
122.8	916.53	122.8	947.455	122.8	804.553	122.7	628.509	122.7	427.422	122.8	35.9321	122.8	-102.196	122.8	-67.1984
122.9	916.612	122.9	947.528	122.9	804.64	122.8	628.577	122.8	427.574	122.9	36.4875	122.9	-102.243	122.9	-67.2664
123	916.702	123	947.604	123	804.73	122.9	628.621	122.9	427.734	123	37.0336	123	-102.298	123	-67.3273
123.1	916.76	123.1	947.708	123.1	804.808	123	628.695	123	427.87	123.1	37.5969	123.1	-102.333	123.1	-67.3875
123.2	916.831	123.2	947.777	123.2	804.905	123.1	628.774	123.1	428.02	123.2	38.1383	123.2	-102.396	123.2	-67.3961
123.3	916.901	123.3	947.834	123.3	804.96	123.2	628.832	123.2	428.159	123.3	38.6313	123.3	-102.452	123.3	-67.3687
123.4	916.994	123.4	947.883	123.4	805.05	123.3	628.917	123.3	428.313	123.4	39.1555	123.4	-102.52	123.4	-67.3524
123.5	917.073	123.5	948.027	123.5	805.12	123.4	628.98	123.4	428.477	123.5	39.6899	123.5	-102.568	123.5	-67.3695
123.6	917.202	123.6	948.18	123.6	805.191	123.5	629.046	123.5	428.64	123.6	40.2258	123.6	-102.622	123.6	-67.3594
123.7	917.292	123.7	948.295	123.7	805.28	123.6	629.145	123.6	428.793	123.7	40.7914	123.7	-102.677	123.7	-67.3648
123.8	917.392	123.8	948.399	123.8	805.377	123.7	629.215	123.7	428.941	123.8	41.3195	123.8	-102.712	123.8	-67.3648
123.9	917.479	123.9	948.57	123.9	805.441	123.8	629.296	123.8	429.082	123.9	41.8351	123.9	-102.787	123.9	-67.3617
124	917.569	124	948.625	124	805.511	123.9	629.376	123.9	429.234	124	42.3227	124	-102.823	124	-67.3602
124.1	917.663	124.1	948.679	124.1	805.581	124	629.456	124	429.378	124.1	42.8547	124.1	-102.859	124.1	-67.3843
124.2	917.763	124.2	948.73	124.2	805.655	124.1	629.516	124.1	429.512	124.2	43.4156	124.2	-102.893	124.2	-67.4039
124.3	917.889	124.3	948.785	124.3	805.73	124.2	629.584	124.2	429.661	124.3	43.957	124.3	-102.927	124.3	-67.4351
124.4	917.984	124.4	948.836	124.4	805.812	124.3	629.677	124.3	429.784	124.4	44.5297	124.4	-102.946	124.4	-67.4547
124.5	918.064	124.5	948.921	124.5	805.862	124.4	629.762	124.4	429.922	124.5	45.0851	124.5	-102.966	124.5	-67.4625
124.6	918.175	124.6	948.968	124.6	805.944	124.5	629.866	124.5	430.055	124.6	45.6391	124.6	-102.998	124.6	-67.4813
124.7	918.252	124.7	949.038	124.7	806.011	124.6	629.938	124.6	430.184	124.7	46.1875	124.7	-103.024	124.7	-67.4859
124.8	918.35	124.8	949.094	124.8	806.081	124.7	630.016	124.7	430.324	124.8	46.7485	124.8	-103.053	124.8	-67.4711
124.9	918.452	124.9	949.137	124.9	806.132	124.8	630.097	124.8	430.448	124.9	47.3117	124.9	-103.095	124.9	-67.4883
125	918.545	125	949.198	125	806.21	124.9	630.175	124.9	430.563	125	47.8469	125	-103.109	125	-67.5023
125.1	918.663	125.1	949.254	125.1	806.288	125	630.242	125	430.684	125.1	48.3937	125.1	-103.155	125.1	-67.493
125.2	918.755	125.2	949.312	125.2	806.351	125.1	630.325	125.1	430.813	125.2	48.9399	125.2	-103.199	125.2	-67.4695
125.3	918.866	125.3	949.383	125.3	806.402	125.2	630.417	125.2	430.948	125.3	49.4868	125.3	-103.237	125.3	-67.4711
125.4	918.948	125.4	949.441	125.4	806.456	125.3	630.516	125.3	431.074	125.4	50.0344	125.4	-103.255	125.4	-67.4813
125.5	919.038	125.5	949.511	125.5	806.499	125.4	630.577	125.4	431.215	125.5	50.5812	125.5	-103.302	125.5	-67.4711
125.6	919.152	125.6	949.563	125.6	806.57	125.5	630.652	125.5	431.355	125.6	51.1118	125.6	-103.338	125.6	-67.4539
125.7	919.26	125.7	949.645	125.7	806.632	125.6	630.734	125.6	431.491	125.7	51.6406	125.7	-103.384	125.7	-67.45
125.8	919.331	125.8	949.722	125.8	806.701	125.7	630.808	125.7	431.625	125.8	52.1672	125.8	-103.43	125.8	-67.4594
125.9	919.42	125.9	949.792	125.9	806.754	125.8	630.887	125.8	431.754	125.9	52.6821	125.9	-103.466	125.9	-67.4742
126	919.491	126	949.844	126	806.815	125.9	630.968	125.9	431.895	126	53.2094	126	-103.509	126	-67.4774
126.1	919.561	126.1	949.921	126.1	806.873	126	631.031	126	432.055	126.1	53.7414	126.1	-103.56	126.1	-67.4429
126.2	919.62	126.2	950.011	126.2	806.914	126.1	631.082	126.1	432.215	126.2	54.2844	126.2	-103.567	126.2	-67.4429
126.3	919.685	126.3	950.074	126.3	806.972	126.2	631.136	126.2	432.359	126.3	54.8234	126.3	-103.584	126.3	-67.4594
126.4	919.745	126.4	950.137	126.4	807.045	126.3	631.211	126.3	432.484	126.4	55.35	126.4	-103.595	126.4	-67.4734
126.5	919.826	126.5	950.213	126.5	807.104	126.4	631.247	126.4	432.613	126.5	55.882	126.5	-103.626	126.5	-67.4695
126.6	919.905	126.6	950.285	126.6	807.167	126.5	631.313	126.5	432.757	126.6	56.4125	126.6	-103.645	126.6	-67.4711
126.7	919.978	126.7	950.339	126.7	807.237	126.6	631.366	126.6	432.899	126.7	56.9531	126.7	-103.673	126.7	-67.4891
126.8	920.041	126.8	950.398	126.8	807.315	126.7	631.402	126.7	433.027	126.8	57.5102	126.8	-103.694	126.8	-67.482
126.9	920.12	126.9	950.453	126.9	807.387	126.8	631.456	126.8	433.135	126.9	58.0586	126.9	-103.699	126.9	-67.4859
127	920.182	127	950.511	127	807.456	126.9	631.52	126.9	433.273	127	58.6125	127	-103.72	127	-67.4859
127.1	920.265	127.1	950.574	127.1	807.511	127	631.563	127	433.407	127.1	59.1633	127.1	-103.735	127.1	-67.4859
127.2	920.345	127.2	950.625	127.2	807.557	127.1	631.633	127.1	433.523	127.2	59.7094	127.2	-103.759	127.2	-67.525
127.3	920.44	127.3	950.687	127.3	807.62	127.2	631.726	127.2	433.656	127.3	60.2383	127.3	-103.794	127.3	-67.5367
127.4	920.507	127.4	950.778	127.4	807.694	127.3	631.786	127.3	433.784	127.4	60.7719	127.4	-103.849	127.4	-67.5445
127.5	920.595	127.5	950.863	127.5	807.754	127.4	631.844	127.4	433.902	127.5	61.3071	127.5	-103.884	127.5	-67.5516
127.6	920.659	127.6	950.917	127.6	807.815	127.5	631.914	127.5	434.028	127.6	61.8359	127.6	-103.92	127.6	-67.5336
127.7	920.729	127.7	950.98	127.7	807.878	127.6	631.984	127.6	434.176	127.7	62.343	127.7	-103.934	127.7	-67.5273
127.8	920.807	127.8	951.081	127.8	807.956	127.7	632.05	127.7	434.305	127.8	62.8657	127.8	-103.982	127.8	-67.5297
127.9	920.916	127.9	951.145	127.9	808.007	127.8	632.125	127.8	434.436	127.9	63.3984	127.9	-104.024	127.9	-67.5484
128	921.01	128	951.218	128	808.077	127.9	632.187	127.9	434.563	128	63.9055	128	-104.08	128	-67.5484
128.1	921.1	128.1	951.298	128.1	808.14	128	632.242	128	434.684	128.1	64.4445	128.1	-104.126	128.1	-67.5477
128.2	921.187	128.2	951.398	128.2	808.23	128.1	632.324	128.1	434.813	128.2	64.9523	128.2	-104.177	128.2	-67.5757
128.3	921.275	128.3	951.488	128.3	808.295	128.2	632.383	128.2	434.934	128.3	65.4672	128.3	-104.168	128.3	-67.5757
128.4	921.37	128.4	951.574	128.4	808.366	128.3	632.417	128.3	435.035	128.4	65.9766	128.4	-104.141	128.4	-67.5679
128.5	921.459	128.5	951.664	128.5	808.422	128.4	632.492	128.4	435.164	128.5	66.4868	128.5	-104.085	128.5	-67.5789
128.6	921.562	128.6	951.73	128.6	808.471	128.5	632.57	128.5	435.297	128.6	66.9992	128.6	-104.119	128.6	-67.5914
128.7	921.643	128.7	951.808	128.7	808.523	128.6	632.633	128.6	435.409	128.7	67.5195	128.7	-104.276	128.7	-67.6226
128.8	921.724	128.8	951.902	128.8	808.589	128.7	632.684	128.7	435.504	128.8	68.0422	128.8	-104.267	128.8	-67.6586
128.9	921.808	128.9	951.965	128.9	808.655	128.8	632.754	128.8	435.64	128.9	68.5734	128.9	-104.425	128.9	-67.6773
129	921.862	129	952.05	129	808.73	128.9	632.816	128.9	435.762	129	69.0805	129	-104.305	129	-67.6953
129.1	921.923	129.1	952.113	129.1	808.784	129	632.871	129	435.902	129.1	69.6125	129.1	-104.298	129.1	-67.6851
129.2	922.018	129.2	952.176	129.2	808.859	129.1	632.922	129.1	436.023	129.2	70.1078	129.2	-104.341	129.2	-67.7047
129.3	922.105	129.3	952.23	129.3	808.917	129.2	632.984	129.2	436.149	129.3	70.632	129.3	-104.384	129.3	-67.7406
129.4	922.202	129.4	952.313	129.4	808.98	129.3	633.035	129.3	436.264	129.4	71.1437	129.4	-104.432	129.4	-67.7508
129.5	922.26	129.5	952.398	129.5	809.05	129.4	633.097	129.4	436.344	129.5	71.6437	129.5	-104.462	129.5	-67.7586
129.6	922.35	129.6	952.48	129.6	809.109	129.5	633.16	129.5	436.465	129.6	72.1711	129.6	-104.48	129.6	-67.7945
129.7	922.443	129.7	952.546	129.7	809.186	129.6	633.223	129.6	436.605	129.7	72.7101	129.7	-104.509	129.7	-67.8226
129.8	922.566	129.8	952.649	129.8	809.249	129.7	633.305	129.7	436.734	129.8	73.2531	129.8	-104.523	129.8	-67.8375
129.9	922.654	129.9	952.715	129.9	809.303	129.8	633.363	129.8	436.859	129.9	73.7219	129.9	-104.541	129.9	-67.8453
130	922.741	130	952.781	130	809.347	129.9	633.398	129.9	436.965	130	74.1828	130	-104.587	130	-67.8765
130.1	922.835	130.1	952.851	130.1	809.409	130	633.453	130	437.063	130.1	74.6906	130.1	-104.647	130.1	-67.9156
130.2	922.927	130.2	952.914	130.2	809.46	130.1	633.515	130.1	437.176	130.2	75.2023	130.2	-104.738	130.2	-67.957
130.3	922.984	130.3	952.991	130.3	809.519	130.2	633.57	130.2	437.285	130.3	75.7101	130.3	-104.811	130.3	-67.9664
130.4	923.095	130.4	953.074	130.4	809.581	130.3	633.626	130.3	437.409	130.4	76.2344	130.4	-104.852	130.4	-67.982
130.5	923.155	130.5	953.147	130.5	809.652	130.4	633.684	130.4	437.563	130.5	76.7414	130.5	-104.884	130.5	-68.0054
130.6	923.236	130.6	953.215	130.6	809.72	130.5	633.715	130.5	437.672	130.6	77.2539	130.6	-104.936	130.6	-68.0375
130.7	923.319	130.7	953.285	130.7	809.788	130.6	633.757	130.6	437.793	130.7	77.7609	130.7	-104.942	130.7	-68.0484
130.8	923.389	130.8	953.366	130.8	809.847	130.7	633.835	130.7	437.917	130.8	78.2805	130.8	-104.953	130.8	-68.0516
130.9	923.42	130.9	953.427	130.9	809.909	130.8	633.891	130.8	438.055	130.9	78.8195	130.9	-104.951	130.9	-68.0445
131	923.491	131	953.523	131	809.96	130.9	633.966	130.9	438.188	131	79.3391	131	-104.961	131	-68.0328
131.1	923.549	131.1	953.577	131.1	810.026	131	634.043	131	438.339	131.1	79.8703	131.1	-104.97	131.1	-68.0172
131.2	923.62	131.2	953.659	131.2	810.058	131.1	634.116	131.1	438.473	131.2	80.3945	131.2	-105.005	131.2	-67.993
131.3	923.69	131.3	953.727	131.3	810.14	131.2	634.177	131.2	438.613	131.3	80.8781	131.3	-105.07	131.3	-67.9789
131.4	923.765	131.4	953.773	131.4	810.198	131.3	634.245	131.3	438.746	131.4	81.3898	131.4	-105.104	131.4	-67.993
131.5	923.831	131.5	953.844	131.5	810.245	131.4	634.305	131.4	438.878	131.5	81.9016	131.5	-105.17	131.5	-67.9617
131.6	923.92	131.6	953.924	131.6	810.288	131.5	634.352	131.5	438.989	131.6	82.3898	131.6	-105.199	131.6	-67.9594
131.7	923.998	131.7	953.977	131.7	810.327	131.6	634.441	131.6	439.125	131.7	82.9141	131.7	-105.225	131.7	-67.9813
131.8	924.088	131.8	954.058	131.8	810.39	131.7	634.527	131.7	439.249	131.8	83.4211	131.8	-105.258	131.8	-68.0054
131.9	924.17	131.9	954.145	131.9	810.448	131.8	634.587	131.8	439.363	131.9	83.9063	131.9	-105.338	131.9	-68.0367
132	924.253	132	954.215	132	810.53	131.9	634.636	131.9	439.473	132	84.4016	132	-105.4	132	-68.0516
132.1	924.331	132.1	954.284	132.1	810.599	132	634.691	132	439.594	132.1	84.9164	132.1	-105.434	132.1	-68.0757
132.2	924.42	132.2	954.368	132.2	810.644	132.1	634.742	132.1	439.695	132.2	85.4336	132.2	-105.456	132.2	-68.0953
132.3	924.491	132.3	954.46	132.3	810.722	132.2	634.765	132.2	439.805	132.3	85.9601	132.3	-105.461	132.3	-68.0984
132.4	924.581	132.4	954.523	132.4	810.788	132.3	634.817	132.3	439.916	132.4	86.4797	132.4	-105.49	132.4	-68.0953
132.5	924.67	132.5	954.609	132.5	810.862	132.4	634.875	132.4	440.012	132.5	87.0086	132.5	-105.497	132.5	-68.107
132.6	924.741	132.6	954.684	132.6	810.953	132.5	634.924	132.5	440.113	132.6	87.55	132.6	-105.524	132.6	-68.1219
132.7	924.806	132.7	954.746	132.7	811.019	132.6	634.997	132.6	440.227	132.7	88.0703	132.7	-105.564	132.7	-68.1195
132.8	924.885	132.8	954.831	132.8	811.092	132.7	635.058	132.7	440.323	132.8	88.5891	132.8	-105.563	132.8	-68.1219
132.9	924.964	132.9	954.909	132.9	811.148	132.8	635.113	132.8	440.441	132.9	89.1211	132.9	-105.587	132.9	-68.1117
133	925.049	133	954.968	133	811.218	132.9	635.16	132.9	440.543	133	89.6594	133	-105.63	133	-68.1289
133.1	925.136	133.1	955.048	133.1	811.269	133	635.208	133	440.652	133.1	90.1836	133.1	-105.65	133.1	-68.1117
133.2	925.205	133.2	955.128	133.2	811.331	133.1	635.257	133.1	440.742	133.2	90.7031	133.2	-105.657	133.2	-68.0977
133.3	925.288	133.3	955.206	133.3	811.4	133.2	635.324	133.2	440.855	133.3	91.2297	133.3	-105.704	133.3	-68.0757
133.4	925.341	133.4	955.273	133.4	811.468	133.3	635.378	133.3	440.977	133.4	91.7734	133.4	-105.755	133.4	-68.0679
133.5	925.428	133.5	955.344	133.5	811.519	133.4	635.441	133.4	441.066	133.5	92.2687	133.5	-105.759	133.5	-68.0679
133.6	925.484	133.6	955.409	133.6	811.577	133.5	635.48	133.5	441.164	133.6	92.7852	133.6	-105.794	133.6	-68.0679
133.7	925.549	133.7	955.484	133.7	811.628	133.6	635.536	133.6	441.256	133.7	93.2805	133.7	-105.845	133.7	-68.0562
133.8	925.627	133.8	955.538	133.8	811.702	133.7	635.589	133.7	441.368	133.8	93.7687	133.8	-105.838	133.8	-68.0438
133.9	925.698	133.9	955.605	133.9	811.773	133.8	635.648	133.8	441.484	133.9	94.2844	133.9	-105.88	133.9	-68.0203
134	925.769	134	955.667	134	811.834	133.9	635.704	133.9	441.547	134	94.8086	134	-105.934	134	-67.9695
134.1	925.823	134.1	955.742	134.1	811.914	134	635.757	134	441.64	134.1	95.3273	134.1	-105.91	134.1	-68.0054
134.2	925.884	134.2	955.785	134.2	811.991	134.1	635.817	134.1	441.746	134.2	95.8125	134.2	-105.916	134.2	-68.0609
134.3	925.964	134.3	955.851	134.3	812.029	134.2	635.866	134.2	441.824	134.3	96.3125	134.3	-105.915	134.3	-68.0633
134.4	926.049	134.4	955.895	134.4	812.094	134.3	635.915	134.3	441.914	134.4	96.8391	134.4	-105.927	134.4	-68.0797
134.5	926.123	134.5	955.948	134.5	812.155	134.4	635.995	134.4	441.996	134.5	97.3	134.5	-105.915	134.5	-68.0992
134.6	926.209	134.6	956.027	134.6	812.191	134.5	636.067	134.5	442.104	134.6	97.7813	134.6	-105.915	134.6	-68.0898
134.7	926.291	134.7	956.113	134.7	812.245	134.6	636.128	134.6	442.191	134.7	98.2961	134.7	-105.934	134.7	-68.0875
134.8	926.381	134.8	956.184	134.8	812.269	134.7	636.206	134.7	442.298	134.8	98.8125	134.8	-105.954	134.8	-68.0562
134.9	926.443	134.9	956.277	134.9	812.32	134.8	636.274	134.8	442.375	134.9	99.3	134.9	-105.951	134.9	-68.0516
135	926.515	135	956.363	135	812.378	134.9	636.347	134.9	442.465	135	99.7883	135	-105.982	135	-68.0531
135.1	926.608	135.1	956.414	135.1	812.452	135	636.427	135	442.553	135.1	100.281	135.1	-106.009	135.1	-68.0516
135.2	926.717	135.2	956.463	135.2	812.507	135.1	636.488	135.1	442.669	135.2	100.796	135.2	-105.989	135.2	-68.0399
135.3	926.811	135.3	956.531	135.3	812.57	135.2	636.567	135.2	442.773	135.3	101.298	135.3	-105.992	135.3	-68.025
135.4	926.901	135.4	956.594	135.4	812.64	135.3	636.628	135.3	442.887	135.4	101.788	135.4	-105.966	135.4	-68.0367
135.5	926.995	135.5	956.676	135.5	812.674	135.4	636.684	135.4	442.988	135.5	102.301	135.5	-105.954	135.5	-68.0687
135.6	927.095	135.6	956.754	135.6	812.73	135.5	636.745	135.5	443.097	135.6	102.791	135.6	-105.966	135.6	-68.0906
135.7	927.17	135.7	956.812	135.7	812.795	135.6	636.805	135.6	443.184	135.7	103.286	135.7	-105.963	135.7	-68.1148
135.8	927.253	135.8	956.87	135.8	812.836	135.7	636.863	135.7	443.293	135.8	103.793	135.8	-105.943	135.8	-68.1226
135.9	927.345	135.9	956.934	135.9	812.882	135.8	636.934	135.8	443.419	135.9	104.3	135.9	-105.966	135.9	-68.1508
136	927.413	136	956.977	136	812.941	135.9	636.976	135.9	443.519	136	104.808	136	-105.97	136	-68.1758
136.1	927.505	136.1	957.053	136.1	812.975	136	636.995	136	443.645	136.1	105.293	136.1	-105.977	136.1	-68.1781
136.2	927.577	136.2	957.137	136.2	813.03	136.1	637.063	136.1	443.769	136.2	105.777	136.2	-105.994	136.2	-68.1727
136.3	927.636	136.3	957.21	136.3	813.065	136.2	637.094	136.2	443.856	136.3	106.254	136.3	-106.023	136.3	-68.1609
136.4	927.698	136.4	957.285	136.4	813.12	136.3	637.148	136.3	443.965	136.4	106.723	136.4	-106.044	136.4	-68.1929
136.5	927.776	136.5	957.347	136.5	813.148	136.4	637.191	136.4	444.058	136.5	107.218	136.5	-106.08	136.5	-68.2047
136.6	927.87	136.6	957.41	136.6	813.206	136.5	637.247	136.5	444.164	136.6	107.698	136.6	-106.15	136.6	-68.1773
136.7	927.94	136.7	957.499	136.7	813.245	136.6	637.296	136.6	444.278	136.7	108.187	136.7	-106.181	136.7	-68.1851
136.8	928.015	136.8	957.563	136.8	813.288	136.7	637.347	136.7	444.37	136.8	108.664	136.8	-106.203	136.8	-68.1968
136.9	928.076	136.9	957.62	136.9	813.324	136.8	637.415	136.8	444.473	136.9	109.097	136.9	-106.235	136.9	-68.1922
137	928.159	137	957.684	137	813.377	136.9	637.465	136.9	444.57	137	109.57	137	-106.279	137	-68.1968
137.1	928.248	137.1	957.746	137.1	813.421	137	637.546	137	444.688	137.1	110.044	137.1	-106.325	137.1	-68.1805
137.2	928.338	137.2	957.803	137.2	813.468	137.1	637.637	137.1	444.8	137.2	110.522	137.2	-106.341	137.2	-68.1851
137.3	928.425	137.3	957.876	137.3	813.514	137.2	637.687	137.2	444.895	137.3	110.993	137.3	-106.376	137.3	-68.2
137.4	928.498	137.4	957.941	137.4	813.558	137.3	637.786	137.3	445.019	137.4	111.48	137.4	-106.395	137.4	-68.2047
137.5	928.6	137.5	958.007	137.5	813.623	137.4	637.854	137.4	445.106	137.5	111.968	137.5	-106.415	137.5	-68.2054
137.6	928.69	137.6	958.102	137.6	813.684	137.5	637.934	137.5	445.206	137.6	112.418	137.6	-106.446	137.6	-68.1875
137.7	928.765	137.7	958.184	137.7	813.73	137.6	637.995	137.6	445.313	137.7	112.93	137.7	-106.451	137.7	-68.1742
137.8	928.842	137.8	958.241	137.8	813.771	137.7	638.075	137.7	445.41	137.8	113.402	137.8	-106.461	137.8	-68.1649
137.9	928.928	137.9	958.293	137.9	813.832	137.8	638.133	137.8	445.523	137.9	113.874	137.9	-106.49	137.9	-68.1688
138	929.038	138	958.355	138	813.929	137.9	638.187	137.9	445.618	138	114.371	138	-106.513	138	-68.1625
138.1	929.12	138.1	958.409	138.1	813.983	138	638.254	138	445.73	138.1	114.852	138.1	-106.52	138.1	-68.1649
138.2	929.197	138.2	958.484	138.2	814.062	138.1	638.273	138.1	445.824	138.2	115.327	138.2	-106.536	138.2	-68.1539
138.3	929.26	138.3	958.55	138.3	814.135	138.2	638.327	138.2	445.909	138.3	115.773	138.3	-106.541	138.3	-68.1773
138.4	929.336	138.4	958.609	138.4	814.179	138.3	638.387	138.3	446.004	138.4	116.237	138.4	-106.548	138.4	-68.1805
138.5	929.427	138.5	958.676	138.5	814.252	138.4	638.445	138.4	446.087	138.5	116.698	138.5	-106.575	138.5	-68.1773
138.6	929.491	138.6	958.738	138.6	814.324	138.5	638.488	138.5	446.198	138.6	117.152	138.6	-106.619	138.6	-68.1929
138.7	929.581	138.7	958.798	138.7	814.409	138.6	638.527	138.6	446.305	138.7	117.648	138.7	-106.63	138.7	-68.2195
138.8	929.651	138.8	958.859	138.8	814.475	138.7	638.575	138.7	446.398	138.8	118.113	138.8	-106.652	138.8	-68.2515
138.9	929.752	138.9	958.917	138.9	814.538	138.8	638.633	138.8	446.516	138.9	118.59	138.9	-106.677	138.9	-68.2601
139	929.814	139	958.965	139	814.589	138.9	638.672	138.9	446.628	139	119.073	139	-106.692	139	-68.2625
139.1	929.894	139.1	959.023	139.1	814.643	139	638.703	139	446.715	139.1	119.551	139.1	-106.701	139.1	-68.2719
139.2	929.974	139.2	959.089	139.2	814.718	139.1	638.738	139.1	446.798	139.2	120.039	139.2	-106.72	139.2	-68.2742
139.3	930.062	139.3	959.145	139.3	814.777	139.2	638.793	139.2	446.909	139.3	120.539	139.3	-106.747	139.3	-68.2672
139.4	930.175	139.4	959.218	139.4	814.854	139.3	638.852	139.3	447.004	139.4	121.027	139.4	-106.773	139.4	-68.2742
139.5	930.275	139.5	959.293	139.5	814.922	139.4	638.898	139.4	447.094	139.5	121.503	139.5	-106.771	139.5	-68.2593
139.6	930.377	139.6	959.355	139.6	814.975	139.5	638.93	139.5	447.179	139.6	121.981	139.6	-106.77	139.6	-68.243
139.7	930.479	139.7	959.441	139.7	815.038	139.6	638.992	139.6	447.262	139.7	122.476	139.7	-106.759	139.7	-68.2242
139.8	930.566	139.8	959.523	139.8	815.094	139.7	639.054	139.7	447.355	139.8	122.93	139.8	-106.773	139.8	-68.2281
139.9	930.654	139.9	959.609	139.9	815.155	139.8	639.145	139.8	447.434	139.9	123.391	139.9	-106.759	139.9	-68.1922
140	930.714	140	959.703	140	815.21	139.9	639.184	139.9	447.496	140	123.847	140	-106.744	140	-68.2476
140.1	930.819	140.1	959.808	140.1	815.284	140	639.238	140	447.57	140.1	124.313	140.1	-106.727	140.1	-68.282
140.2	930.901	140.2	959.899	140.2	815.339	140.1	639.317	140.1	447.672	140.2	124.789	140.2	-106.72	140.2	-68.2945
140.3	930.955	140.3	959.995	140.3	815.373	140.2	639.378	140.2	447.77	140.3	125.226	140.3	-106.707	140.3	-68.3336
140.4	931.023	140.4	960.079	140.4	815.409	140.3	639.438	140.3	447.866	140.4	125.672	140.4	-106.693	140.4	-68.3406
140.5	931.1	140.5	960.179	140.5	815.448	140.4	639.468	140.4	447.953	140.5	126.093	140.5	-106.688	140.5	-68.3961
140.6	931.163	140.6	960.254	140.6	815.487	140.5	639.527	140.5	448.055	140.6	126.547	140.6	-106.691	140.6	-68.4312
140.7	931.216	140.7	960.327	140.7	815.545	140.6	639.606	140.6	448.157	140.7	127.012	140.7	-106.716	140.7	-68.4515
140.8	931.26	140.8	960.395	140.8	815.597	140.7	639.667	140.7	448.249	140.8	127.466	140.8	-106.728	140.8	-68.45
140.9	931.331	140.9	960.473	140.9	815.659	140.8	639.735	140.8	448.324	140.9	127.917	140.9	-106.747	140.9	-68.4781
141	931.377	141	960.57	141	815.71	140.9	639.788	140.9	448.409	141	128.363	141	-106.759	141	-68.4891
141.1	931.464	141.1	960.636	141.1	815.769	141	639.863	141	448.501	141.1	128.796	141.1	-106.783	141.1	-68.5054
141.2	931.53	141.2	960.739	141.2	815.839	141.1	639.922	141.1	448.597	141.2	129.255	141.2	-106.798	141.2	-68.5219
141.3	931.615	141.3	960.788	141.3	815.902	141.2	639.989	141.2	448.664	141.3	129.711	141.3	-106.797	141.3	-68.5078
141.4	931.702	141.4	960.847	141.4	815.941	141.3	640.058	141.3	448.754	141.4	130.172	141.4	-106.798	141.4	-68.5101
141.5	931.784	141.5	960.907	141.5	816.029	141.4	640.102	141.4	448.827	141.5	130.633	141.5	-106.795	141.5	-68.4734
141.6	931.845	141.6	960.96	141.6	816.077	141.5	640.187	141.5	448.922	141.6	131.112	141.6	-106.809	141.6	-68.4422
141.7	931.894	141.7	961.019	141.7	816.148	141.6	640.247	141.6	449.023	141.7	131.583	141.7	-106.832	141.7	-68.4468
141.8	931.966	141.8	961.063	141.8	816.206	141.7	640.308	141.7	449.094	141.8	132.046	141.8	-106.849	141.8	-68.4156
141.9	932.054	141.9	961.145	141.9	816.269	141.8	640.371	141.8	449.198	141.9	132.488	141.9	-106.86	141.9	-68.4195
142	932.146	142	961.21	142	816.296	141.9	640.43	141.9	449.286	142	132.942	142	-106.832	142	-68.3914
142.1	932.227	142.1	961.273	142.1	816.336	142	640.484	142	449.387	142.1	133.421	142.1	-106.822	142.1	-68.3719
142.2	932.298	142.2	961.339	142.2	816.38	142.1	640.534	142.1	449.48	142.2	133.906	142.2	-106.821	142.2	-68.3617
142.3	932.357	142.3	961.395	142.3	816.398	142.2	640.594	142.2	449.574	142.3	134.356	142.3	-106.824	142.3	-68.3594
142.4	932.413	142.4	961.465	142.4	816.448	142.3	640.652	142.3	449.687	142.4	134.796	142.4	-106.822	142.4	-68.3453
142.5	932.498	142.5	961.518	142.5	816.519	142.4	640.706	142.4	449.786	142.5	135.25	142.5	-106.841	142.5	-68.3211
142.6	932.561	142.6	961.563	142.6	816.57	142.5	640.766	142.5	449.895	142.6	135.672	142.6	-106.844	142.6	-68.3414
142.7	932.624	142.7	961.645	142.7	816.623	142.6	640.808	142.6	449.965	142.7	136.105	142.7	-106.837	142.7	-68.3695
142.8	932.709	142.8	961.715	142.8	816.684	142.7	640.844	142.7	450.05	142.8	136.555	142.8	-106.826	142.8	-68.3641
142.9	932.756	142.9	961.784	142.9	816.73	142.8	640.863	142.8	450.149	142.9	137	142.9	-106.813	142.9	-68.3648
143	932.823	143	961.832	143	816.759	142.9	640.898	142.9	450.245	143	137.457	143	-106.834	143	-68.3843
143.1	932.87	143.1	961.887	143.1	816.827	143	640.966	143	450.344	143.1	137.91	143.1	-106.817	143.1	-68.4031
143.2	932.94	143.2	961.926	143.2	816.917	143.1	641.027	143.1	450.438	143.2	138.32	143.2	-106.829	143.2	-68.4008
143.3	933.018	143.3	961.972	143.3	816.968	143.2	641.07	143.2	450.523	143.3	138.762	143.3	-106.837	143.3	-68.4227
143.4	933.085	143.4	962.011	143.4	817.038	143.3	641.152	143.3	450.617	143.4	139.199	143.4	-106.841	143.4	-68.439
143.5	933.142	143.5	962.074	143.5	817.081	143.4	641.226	143.4	450.698	143.5	139.648	143.5	-106.848	143.5	-68.45
143.6	933.229	143.6	962.14	143.6	817.131	143.5	641.281	143.5	450.793	143.6	140.109	143.6	-106.829	143.6	-68.4859
143.7	933.288	143.7	962.195	143.7	817.148	143.6	641.356	143.6	450.866	143.7	140.547	143.7	-106.824	143.7	-68.4742
143.8	933.366	143.8	962.233	143.8	817.187	143.7	641.417	143.7	450.941	143.8	140.977	143.8	-106.817	143.8	-68.4813
143.9	933.435	143.9	962.29	143.9	817.23	143.8	641.497	143.8	451.016	143.9	141.395	143.9	-106.81	143.9	-68.4937
144	933.523	144	962.327	144	817.288	143.9	641.573	143.9	451.07	144	141.804	144	-106.824	144	-68.525
144.1	933.6	144.1	962.387	144.1	817.331	144	641.637	144	451.176	144.1	142.212	144.1	-106.802	144.1	-68.525
144.2	933.695	144.2	962.463	144.2	817.359	144.1	641.667	144.1	451.257	144.2	142.644	144.2	-106.798	144.2	-68.525
144.3	933.767	144.3	962.512	144.3	817.388	144.2	641.716	144.2	451.332	144.3	143.07	144.3	-106.778	144.3	-68.5242
144.4	933.831	144.4	962.574	144.4	817.445	144.3	641.777	144.3	451.414	144.4	143.485	144.4	-106.734	144.4	-68.5093
144.5	933.909	144.5	962.64	144.5	817.499	144.4	641.801	144.4	451.469	144.5	143.898	144.5	-106.701	144.5	-68.5132
144.6	933.983	144.6	962.695	144.6	817.581	144.5	641.832	144.5	451.55	144.6	144.312	144.6	-106.727	144.6	-68.5406
144.7	934.038	144.7	962.761	144.7	817.647	144.6	641.883	144.6	451.605	144.7	144.723	144.7	-106.731	144.7	-68.5516
144.8	934.12	144.8	962.82	144.8	817.73	144.7	641.914	144.7	451.679	144.8	145.155	144.8	-106.72	144.8	-68.5711
144.9	934.198	144.9	962.895	144.9	817.815	144.8	641.945	144.8	451.781	144.9	145.57	144.9	-106.727	144.9	-68.5922
145	934.284	145	962.948	145	817.878	144.9	641.985	144.9	451.868	145	145.996	145	-106.705	145	-68.5945
145.1	934.342	145.1	963.023	145.1	817.941	145	642.046	145	451.96	145.1	146.423	145.1	-106.7	145.1	-68.6219
145.2	934.404	145.2	963.082	145.2	818.011	145.1	642.098	145.1	452.043	145.2	146.835	145.2	-106.727	145.2	-68.6414
145.3	934.459	145.3	963.152	145.3	818.089	145.2	642.148	145.2	452.116	145.3	147.246	145.3	-106.754	145.3	-68.6461
145.4	934.515	145.4	963.215	145.4	818.159	145.3	642.208	145.3	452.191	145.4	147.66	145.4	-106.779	145.4	-68.6851
145.5	934.592	145.5	963.281	145.5	818.22	145.4	642.269	145.4	452.262	145.5	148.075	145.5	-106.832	145.5	-68.7094
145.6	934.654	145.6	963.351	145.6	818.273	145.5	642.313	145.5	452.348	145.6	148.503	145.6	-106.805	145.6	-68.7039
145.7	934.734	145.7	963.407	145.7	818.32	145.6	642.366	145.6	452.405	145.7	148.923	145.7	-106.822	145.7	-68.7117
145.8	934.819	145.8	963.468	145.8	818.359	145.7	642.427	145.7	452.497	145.8	149.34	145.8	-106.832	145.8	-68.6922
145.9	934.877	145.9	963.555	145.9	818.405	145.8	642.476	145.8	452.577	145.9	149.761	145.9	-106.817	145.9	-68.6508
146	934.972	146	963.628	146	818.448	145.9	642.539	145.9	452.664	146	150.192	146	-106.794	146	-68.6484
146.1	935.054	146.1	963.687	146.1	818.502	146	642.594	146	452.719	146.1	150.622	146.1	-106.802	146.1	-68.6312
146.2	935.146	146.2	963.773	146.2	818.546	146.1	642.629	146.1	452.827	146.2	151.073	146.2	-106.798	146.2	-68.6024
146.3	935.206	146.3	963.827	146.3	818.589	146.2	642.684	146.2	452.895	146.3	151.488	146.3	-106.79	146.3	-68.5828
146.4	935.272	146.4	963.887	146.4	818.633	146.3	642.742	146.3	452.945	146.4	151.918	146.4	-106.778	146.4	-68.5804
146.5	935.326	146.5	963.96	146.5	818.679	146.4	642.793	146.4	452.999	146.5	152.368	146.5	-106.786	146.5	-68.5633
146.6	935.37	146.6	964.023	146.6	818.733	146.5	642.866	146.5	453.087	146.6	152.816	146.6	-106.773	146.6	-68.575
146.7	935.448	146.7	964.07	146.7	818.769	146.6	642.907	146.6	453.167	146.7	153.231	146.7	-106.766	146.7	-68.5562
146.8	935.53	146.8	964.14	146.8	818.82	146.7	642.968	146.7	453.254	146.8	153.675	146.8	-106.766	146.8	-68.5367
146.9	935.608	146.9	964.188	146.9	818.885	146.8	643.016	146.8	453.329	146.9	154.107	146.9	-106.763	146.9	-68.5328
147	935.69	147	964.261	147	818.948	146.9	643.058	146.9	453.409	147	154.534	147	-106.766	147	-68.5601
147.1	935.748	147.1	964.316	147.1	818.999	147	643.113	147	453.468	147.1	154.945	147.1	-106.77	147.1	-68.5664
[truncated: 8,145 more rows]
