# Supplementary material for: Mutational phospho-mimicry reveals a regulatory role for the XRCC4 and XLF C-terminal tails in modulating DNA bridging during classical non-homologous end joining
Source: eLife journal article supplement (doi:10.7554/elife.22900), 2017-05-13
Supplement: supp [file elife-22900-supp-v1.zip › elife_poa_e22900_Figure_8_source_data_3.txt.txt]

Time	WT-WT_4uM	Time	WT-WT_2uM	Time	WT-WT_1uM	Time	WT-WT_0.5uM	Time	WT-WT_0.25uM	Time	WT-WT_0.125uM	Time	WT-WT_0.0625uM	Time	WT-WT_0.03125uM
s	RU	s	RU	s	RU	s	RU	s	RU	s	RU	s	RU	s	RU
-52.7	3.59766	-52.5	3.13672	-52.7	2.45313	-52.5	2.32343	-52.6	2.23749	-52.7	2.19141	-52.7	2.21094	-52.6	1.73438
-52.6	3.57813	-52.4	3.09766	-52.6	2.41016	-52.4	2.21405	-52.5	2.15936	-52.6	2.25	-52.6	2.28125	-52.5	1.72266
-52.5	3.52734	-52.3	3.06641	-52.5	2.33203	-52.3	2.22577	-52.4	2.15936	-52.5	2.25	-52.5	2.23047	-52.4	1.71484
-52.4	3.51953	-52.2	3.02734	-52.4	2.33203	-52.2	2.18671	-52.3	2.14764	-52.4	2.21094	-52.4	2.26172	-52.3	1.66406
-52.3	3.5	-52.1	3.01563	-52.3	2.32031	-52.1	2.16718	-52.2	2.07733	-52.3	2.21094	-52.3	2.25	-52.2	1.64453
-52.2	3.45703	-52	2.98828	-52.2	2.27344	-52	2.16718	-52.1	2.0578	-52.2	2.19141	-52.2	2.26953	-52.1	1.63281
-52.1	3.41797	-51.9	2.95703	-52.1	2.24219	-51.9	2.14374	-52	2.0578	-52.1	2.19922	-52.1	2.26172	-52	1.61328
-52	3.39844	-51.8	2.92578	-52	2.21094	-51.8	2.10468	-51.9	2.03827	-52	2.17969	-52	2.26953	-51.9	1.60547
-51.9	3.37891	-51.7	2.90625	-51.9	2.17969	-51.7	2.06561	-51.8	2.01874	-51.9	2.17188	-51.9	2.26172	-51.8	1.59375
-51.8	3.34766	-51.6	2.88672	-51.8	2.16016	-51.6	2.02655	-51.7	1.98749	-51.8	2.14063	-51.8	2.25	-51.7	1.57422
-51.7	3.33984	-51.5	2.86719	-51.7	2.13281	-51.5	1.9953	-51.6	1.96796	-51.7	2.12891	-51.7	2.24219	-51.6	1.5625
-51.6	3.30859	-51.4	2.84766	-51.6	2.11328	-51.4	1.97577	-51.5	1.94843	-51.6	2.10156	-51.6	2.23047	-51.5	1.52344
-51.5	3.29688	-51.3	2.82813	-51.5	2.08984	-51.3	1.95624	-51.4	1.91718	-51.5	2.08203	-51.5	2.19922	-51.4	1.50391
-51.4	3.27734	-51.2	2.80859	-51.4	2.07031	-51.2	1.92499	-51.3	1.89764	-51.4	2.0625	-51.4	2.17969	-51.3	1.47266
-51.3	3.25781	-51.1	2.77734	-51.3	2.0625	-51.1	1.90546	-51.2	1.87811	-51.3	2.03906	-51.3	2.16016	-51.2	1.44531
-51.2	3.23047	-51	2.75781	-51.2	2.04297	-51	1.89374	-51.1	1.85858	-51.2	2.01953	-51.2	2.14063	-51.1	1.41406
-51.1	3.19922	-50.9	2.72656	-51.1	2.03125	-50.9	1.87421	-51	1.83905	-51.1	2	-51.1	2.12109	-51	1.38281
-51	3.16797	-50.8	2.70703	-51	2.01172	-50.8	1.86639	-50.9	1.82733	-51	1.98047	-51	2.10156	-50.9	1.35547
-50.9	3.14063	-50.7	2.67578	-50.9	1.99219	-50.7	1.84686	-50.8	1.79608	-50.9	1.94922	-50.9	2.08203	-50.8	1.33203
-50.8	3.10938	-50.6	2.65625	-50.8	1.96094	-50.6	1.83514	-50.7	1.77655	-50.8	1.92969	-50.8	2.05078	-50.7	1.3125
-50.7	3.07813	-50.5	2.63672	-50.7	1.95313	-50.5	1.80389	-50.6	1.75702	-50.7	1.91016	-50.7	2.03125	-50.6	1.29297
-50.6	3.05859	-50.4	2.61719	-50.6	1.92969	-50.4	1.78436	-50.5	1.73749	-50.6	1.89063	-50.6	2.01172	-50.5	1.26172
-50.5	3.03906	-50.3	2.58594	-50.5	1.91016	-50.3	1.76483	-50.4	1.70624	-50.5	1.87109	-50.5	1.96875	-50.4	1.23438
-50.4	3	-50.2	2.55859	-50.4	1.89063	-50.2	1.7453	-50.3	1.68671	-50.4	1.85938	-50.4	1.94141	-50.3	1.21484
-50.3	2.98047	-50.1	2.53516	-50.3	1.86328	-50.1	1.72577	-50.2	1.66718	-50.3	1.83984	-50.3	1.91016	-50.2	1.19531
-50.2	2.95703	-50	2.51563	-50.2	1.85156	-50	1.69452	-50.1	1.64764	-50.2	1.82031	-50.2	1.87891	-50.1	1.17188
-50.1	2.92969	-49.9	2.49609	-50.1	1.83203	-49.9	1.67499	-50	1.62811	-50.1	1.80078	-50.1	1.85938	-50	1.14453
-50	2.91797	-49.8	2.47656	-50	1.8125	-49.8	1.64374	-49.9	1.60858	-50	1.76953	-50	1.82031	-49.9	1.11328
-49.9	2.88672	-49.7	2.42108	-49.9	1.84454	-49.7	1.57263	-49.8	1.61249	-49.9	1.71094	-49.9	1.79376	-49.8	1.13361
-49.8	2.87891	-49.6	2.35547	-49.8	1.88281	-49.6	1.48669	-49.7	1.59607	-49.8	1.64063	-49.8	1.78595	-49.7	1.18359
-49.7	2.84454	-49.5	2.34375	-49.7	1.85468	-49.5	1.48358	-49.6	1.55078	-49.7	1.625	-49.7	1.76563	-49.6	1.16016
-49.6	2.82343	-49.4	2.34845	-49.6	1.85236	-49.4	1.45624	-49.5	1.54297	-49.6	1.58514	-49.6	1.70547	-49.5	1.15704
-49.5	2.81329	-49.3	2.34766	-49.5	1.84766	-49.3	1.42499	-49.4	1.54138	-49.5	1.57031	-49.5	1.65234	-49.4	1.13983
-49.4	2.80859	-49.2	2.32111	-49.4	1.84454	-49.2	1.42499	-49.3	1.51874	-49.4	1.55548	-49.4	1.59686	-49.3	1.11328
-49.3	2.79376	-49.1	2.30859	-49.3	1.83514	-49.1	1.41016	-49.2	1.4953	-49.3	1.54767	-49.3	1.54767	-49.2	1.07422
-49.2	2.76483	-49	2.28516	-49.2	1.83282	-49	1.41638	-49.1	1.4953	-49.2	1.52655	-49.2	1.53125	-49.1	1.04608
-49.1	2.75079	-48.9	2.27264	-49.1	1.83203	-48.9	1.42578	-49	1.47577	-49.1	1.51642	-49.1	1.51483	-49	1.03595
-49	2.75311	-48.8	2.24609	-49	1.80859	-48.8	1.4375	-48.9	1.47266	-49	1.50702	-49	1.5047	-48.9	1.03125
-48.9	2.73828	-48.7	2.23126	-48.9	1.80078	-48.7	1.43982	-48.8	1.45624	-48.9	1.49689	-48.9	1.5	-48.8	1.01642
-48.8	2.73126	-48.6	2.22186	-48.8	1.78595	-48.6	1.4375	-48.7	1.43201	-48.8	1.48749	-48.8	1.5	-48.7	1
-48.7	2.72656	-48.5	2.20001	-48.7	1.77655	-48.5	1.43982	-48.6	1.4328	-48.7	1.48517	-48.7	1.49689	-48.6	1
-48.6	2.71875	-48.4	2.19531	-48.6	1.76642	-48.4	1.43436	-48.5	1.42969	-48.6	1.47577	-48.6	1.4953	-48.5	1
-48.5	2.6875	-48.3	2.1875	-48.5	1.74219	-48.3	1.43982	-48.4	1.42188	-48.5	1.46564	-48.5	1.48517	-48.4	1
-48.4	2.6922	-48.2	2.17578	-48.4	1.73828	-48.2	1.4328	-48.3	1.41248	-48.4	1.44611	-48.4	1.47266	-48.3	1
-48.3	2.6875	-48.1	2.18359	-48.3	1.73358	-48.1	1.4375	-48.2	1.40546	-48.3	1.43671	-48.3	1.46094	-48.2	0.996887
-48.2	2.67969	-48	2.18048	-48.2	1.71643	-48	1.4281	-48.1	1.40234	-48.2	1.42969	-48.2	1.45782	-48.1	0.9953
-48.1	2.67267	-47.9	2.1875	-48.1	1.71405	-47.9	1.42969	-48	1.39764	-48.1	1.42657	-48.1	1.43671	-48	0.989838
-48	2.67499	-47.8	2.18359	-48	1.70392	-47.8	1.4328	-47.9	1.39764	-48	1.41718	-48	1.42657	-47.9	0.992188
-47.9	2.65625	-47.7	2.19531	-47.9	1.69452	-47.7	1.42969	-47.8	1.38593	-47.9	1.41016	-47.9	1.42188	-47.8	0.987488
-47.8	2.65314	-47.6	2.1922	-47.8	1.67267	-47.6	1.42499	-47.7	1.37109	-47.8	1.41486	-47.8	1.41718	-47.7	0.96875
-47.7	2.66016	-47.5	2.19061	-47.7	1.66797	-47.5	1.4281	-47.6	1.36169	-47.7	1.40704	-47.7	1.40314	-47.6	0.965637
-47.6	2.63672	-47.4	2.18518	-47.6	1.66797	-47.4	1.41797	-47.5	1.35156	-47.6	1.39764	-47.6	1.40234	-47.5	0.960938
-47.5	2.64844	-47.3	2.1828	-47.5	1.64844	-47.3	1.41327	-47.4	1.34216	-47.5	1.39532	-47.5	1.38751	-47.4	0.949219
-47.4	2.64844	-47.2	2.16797	-47.4	1.64532	-47.2	1.41327	-47.3	1.32031	-47.4	1.39764	-47.4	1.38281	-47.3	0.9422
-47.3	2.64142	-47.1	2.15625	-47.3	1.64374	-47.1	1.41016	-47.2	1.31091	-47.3	1.39844	-47.3	1.38593	-47.2	0.944519
-47.2	2.62891	-47	2.15314	-47.2	1.63361	-47	1.40857	-47.1	1.30859	-47.2	1.39999	-47.2	1.37579	-47.1	0.9422
-47.1	2.63202	-46.9	2.15625	-47.1	1.61719	-46.9	1.41016	-47	1.29608	-47.1	1.39764	-47.1	1.37109	-47	0.949219
-47	2.61877	-46.8	2.15625	-47	1.61719	-46.8	1.41327	-46.9	1.30389	-47	1.38751	-47	1.37891	-46.9	0.949219
-46.9	2.61719	-46.7	2.15625	-46.9	1.61407	-46.7	1.40546	-46.8	1.3125	-46.9	1.38281	-46.9	1.39063	-46.8	0.949219
-46.8	2.60468	-46.6	2.15625	-46.8	1.60468	-46.6	1.39374	-46.7	1.3078	-46.8	1.37811	-46.8	1.39532	-46.7	0.950775
-46.7	2.59766	-46.5	2.15625	-46.7	1.58594	-46.5	1.41327	-46.6	1.30389	-46.7	1.37579	-46.7	1.40546	-46.6	0.941406
-46.6	2.58752	-46.4	2.14923	-46.6	1.57501	-46.4	1.41797	-46.5	1.30078	-46.6	1.36639	-46.6	1.40314	-46.5	0.953125
-46.5	2.59766	-46.3	2.14453	-46.5	1.57343	-46.3	1.40857	-46.4	1.3031	-46.5	1.36093	-46.5	1.39844	-46.4	0.956238
-46.4	2.59296	-46.2	2.14923	-46.4	1.56018	-46.2	1.41327	-46.3	1.30078	-46.4	1.36639	-46.4	1.41016	-46.3	0.953918
-46.3	2.57501	-46.1	2.16797	-46.3	1.55078	-46.1	1.41797	-46.2	1.29608	-46.3	1.35626	-46.3	1.40704	-46.2	0.96875
-46.2	2.56641	-46	2.16797	-46.2	1.55389	-46	1.40857	-46.1	1.29608	-46.2	1.33984	-46.2	1.41016	-46.1	0.965637
-46.1	2.56641	-45.9	2.17578	-46.1	1.54688	-45.9	1.39374	-46	1.29138	-46.1	1.34686	-46.1	1.40546	-46	0.960938
-46	2.56641	-45.8	2.17578	-46	1.54376	-45.8	1.37891	-45.9	1.28592	-46	1.34766	-46	1.40314	-45.9	0.96875
-45.9	2.55548	-45.7	2.17267	-45.9	1.52734	-45.7	1.38202	-45.8	1.28357	-45.9	1.34921	-45.9	1.41016	-45.8	0.96875
-45.8	2.53906	-45.6	2.17578	-45.8	1.52734	-45.6	1.37421	-45.7	1.27264	-45.8	1.34686	-45.8	1.40234	-45.7	0.977356
-45.7	2.52734	-45.5	2.16797	-45.7	1.51953	-45.5	1.36719	-45.6	1.26953	-45.7	1.33984	-45.7	1.39063	-45.6	0.980469
-45.6	2.52734	-45.4	2.17578	-45.6	1.5047	-45.4	1.34998	-45.5	1.26483	-45.6	1.34766	-45.6	1.39844	-45.5	0.980469
-45.5	2.52423	-45.3	2.17267	-45.5	1.5	-45.3	1.34766	-45.4	1.26172	-45.5	1.34454	-45.5	1.40314	-45.4	0.980469
-45.4	2.50781	-45.2	2.17578	-45.4	1.48828	-45.2	1.34296	-45.3	1.25232	-45.4	1.33984	-45.4	1.41016	-45.3	0.996887
-45.3	2.50781	-45.1	2.17578	-45.3	1.48828	-45.1	1.35468	-45.2	1.2453	-45.3	1.33984	-45.3	1.40704	-45.2	0.9953
-45.2	2.50781	-45	2.17578	-45.2	1.48517	-45	1.34296	-45.1	1.24219	-45.2	1.33984	-45.2	1.41327	-45.1	1
-45.1	2.5047	-44.9	2.17578	-45.1	1.48047	-44.9	1.33984	-45	1.23749	-45.1	1.34454	-45.1	1.43124	-45	1.00781
-45	2.5	-44.8	2.17267	-45	1.46405	-44.8	1.33514	-44.9	1.23358	-45	1.35156	-45	1.44141	-44.9	1.00781
-44.9	2.50311	-44.7	2.16327	-44.9	1.45862	-44.7	1.34296	-44.8	1.23358	-44.9	1.35156	-44.9	1.43671	-44.8	1.0047
-44.8	2.49298	-44.6	2.15625	-44.8	1.46094	-44.6	1.33984	-44.7	1.23358	-44.8	1.35156	-44.8	1.43439	-44.7	1.0047
-44.7	2.48358	-44.5	2.14142	-44.7	1.45624	-44.5	1.33514	-44.6	1.2453	-44.7	1.34454	-44.7	1.46094	-44.6	1.03125
-44.6	2.47656	-44.4	2.125	-44.6	1.45703	-44.4	1.33044	-44.5	1.2453	-44.6	1.33984	-44.6	1.46875	-44.5	1.03125
-44.5	2.47345	-44.3	2.125	-44.5	1.45703	-44.3	1.33124	-44.4	1.25467	-44.5	1.32733	-44.5	1.46875	-44.4	1.03595
-44.4	2.46875	-44.2	2.12189	-44.4	1.45392	-44.2	1.32813	-44.3	1.24921	-44.4	1.31796	-44.4	1.46564	-44.3	1.03827
-44.3	2.46875	-44.1	2.11719	-44.3	1.44922	-44.1	1.32733	-44.2	1.23279	-44.3	1.3078	-44.3	1.45624	-44.2	1.03595
-44.2	2.45703	-44	2.11719	-44.2	1.44141	-44	1.31171	-44.1	1.23358	-44.2	1.29297	-44.2	1.45703	-44.1	1.04297
-44.1	2.45392	-43.9	2.10547	-44.1	1.4375	-43.9	1.30389	-44	1.25	-44.1	1.28125	-44.1	1.46094	-44	1.03827
-44	2.45703	-43.8	2.10547	-44	1.43439	-43.8	1.30389	-43.9	1.2453	-44	1.28595	-44	1.45392	-43.9	1.04767
-43.9	2.45233	-43.7	2.11328	-43.9	1.44922	-43.7	1.30859	-43.8	1.25702	-43.9	1.28125	-43.9	1.45313	-43.8	1.03906
-43.8	2.45392	-43.6	2.125	-43.8	1.45703	-43.6	1.31091	-43.7	1.26483	-43.8	1.29767	-43.8	1.43829	-43.7	1.04608
-43.7	2.44531	-43.5	2.125	-43.7	1.46564	-43.5	1.30078	-43.6	1.26172	-43.7	1.30078	-43.7	1.44141	-43.6	1.04376
-43.6	2.45392	-43.4	2.12189	-43.6	1.47577	-43.4	1.28748	-43.5	1.26013	-43.6	1.3078	-43.6	1.44141	-43.5	1.05078
-43.5	2.45233	-43.3	2.10547	-43.5	1.46564	-43.3	1.28906	-43.4	1.25781	-43.5	1.28906	-43.5	1.44922	-43.4	1.05078
-43.4	2.4422	-43.2	2.10236	-43.4	1.46875	-43.2	1.29688	-43.3	1.26172	-43.4	1.28595	-43.4	1.43359	-43.3	1.03595
-43.3	2.44922	-43.1	2.09766	-43.3	1.46405	-43.1	1.31873	-43.2	1.25232	-43.3	1.28125	-43.3	1.41797	-43.2	1.03125
-43.2	2.43439	-43	2.09766	-43.2	1.45862	-43	1.31641	-43.1	1.2453	-43.2	1.27814	-43.2	1.41797	-43.1	1.02655
-43.1	2.42499	-42.9	2.09454	-43.1	1.46875	-42.9	1.31873	-43	1.24219	-43.1	1.28125	-43.1	1.41797	-43	1.0289
-43	2.41797	-42.8	2.08124	-43	1.46875	-42.8	1.32108	-42.9	1.24841	-43	1.28125	-43	1.40704	-42.9	1.02655
-42.9	2.42578	-42.7	2.07422	-42.9	1.48828	-42.7	1.33514	-42.8	1.25467	-42.9	1.28125	-42.9	1.39844	-42.8	1.01642
-42.8	2.43439	-42.6	2.07111	-42.8	1.48828	-42.6	1.32343	-42.7	1.25702	-42.8	1.28906	-42.8	1.39844	-42.7	1.00702
-42.7	2.42969	-42.5	2.05469	-42.7	1.50781	-42.5	1.32343	-42.6	1.25702	-42.7	1.28906	-42.7	1.39844	-42.6	1.0047
-42.6	2.43439	-42.4	2.05469	-42.6	1.51953	-42.4	1.30701	-42.5	1.25702	-42.6	1.28595	-42.6	1.39844	-42.5	1.00861
-42.5	2.42969	-42.3	2.05469	-42.5	1.52423	-42.3	1.29688	-42.4	1.25702	-42.5	1.29608	-42.5	1.39532	-42.4	0.992188
-42.4	2.4328	-42.2	2.05157	-42.4	1.51953	-42.2	1.28906	-42.3	1.26483	-42.4	1.30548	-42.4	1.39063	-42.3	0.987488
-42.3	2.42267	-42.1	2.04688	-42.3	1.51953	-42.1	1.27264	-42.2	1.26483	-42.3	1.30078	-42.3	1.39532	-42.2	0.980469
-42.2	2.42969	-42	2.04688	-42.2	1.52423	-42	1.26013	-42.1	1.26953	-42.2	1.29767	-42.2	1.38281	-42.1	0.977356
-42.1	2.41327	-41.9	2.05157	-42.1	1.51483	-41.9	1.24139	-42	1.27655	-42.1	1.29608	-42.1	1.38593	-42	0.956238
-42	2.41565	-41.8	2.04218	-42	1.5047	-41.8	1.24609	-41.9	1.28436	-42	1.28595	-42	1.37891	-41.9	0.950775
-41.9	2.41327	-41.7	2.03516	-41.9	1.50781	-41.7	1.23358	-41.8	1.28906	-41.9	1.28436	-41.9	1.37891	-41.8	0.956238
-41.8	2.40314	-41.6	2.03204	-41.8	1.52734	-41.6	1.21875	-41.7	1.31873	-41.8	1.29376	-41.8	1.38361	-41.7	0.97345
-41.7	2.38672	-41.5	2.01563	-41.7	1.51953	-41.5	1.20703	-41.6	1.32031	-41.7	1.29767	-41.7	1.39532	-41.6	0.975769
-41.6	2.37421	-41.4	2.01563	-41.6	1.51251	-41.4	1.18982	-41.5	1.31561	-41.6	1.28827	-41.6	1.38593	-41.5	0.965637
-41.5	2.3797	-41.3	2.01251	-41.5	1.50781	-41.3	1.16016	-41.4	1.32733	-41.5	1.28906	-41.5	1.37579	-41.4	0.965637
-41.4	2.38672	-41.2	2.00311	-41.4	1.50781	-41.2	1.13593	-41.3	1.3125	-41.4	1.29376	-41.4	1.37891	-41.3	0.972656
-41.3	2.37891	-41.1	1.98907	-41.3	1.5047	-41.1	1.13202	-41.2	1.33124	-41.3	1.30389	-41.3	1.38672	-41.2	0.980469
-41.2	2.36719	-41	2.00079	-41.2	1.51093	-41	1.13672	-41.1	1.35938	-41.2	1.30939	-41.2	1.39844	-41.1	1.00781
-41.1	2.37659	-40.9	2.00311	-41.1	1.51721	-40.9	1.12421	-41	1.38202	-41.1	1.32813	-41.1	1.41797	-41	1.01953
-41	2.37891	-40.8	1.98438	-41	1.51953	-40.8	1.1156	-40.9	1.40234	-41	1.32187	-41	1.42267	-40.9	1.01251
-40.9	2.37891	-40.7	1.96875	-40.9	1.52734	-40.7	1.11404	-40.8	1.40076	-40.9	1.31561	-40.9	1.4375	-40.8	1.02423
-40.8	2.37421	-40.6	1.93439	-40.8	1.53906	-40.6	1.11951	-40.7	1.40234	-40.8	1.31329	-40.8	1.45859	-40.7	1.03906
-40.7	2.35547	-40.5	1.90546	-40.7	1.51953	-40.5	1.09296	-40.6	1.37811	-40.7	1.33203	-40.7	1.45624	-40.6	1.06329
-40.6	2.33752	-40.4	1.85938	-40.6	1.49219	-40.4	1.07813	-40.5	1.34998	-40.6	1.3172	-40.6	1.46094	-40.5	1.07343
-40.5	2.33594	-40.3	1.82813	-40.5	1.46094	-40.3	1.09296	-40.4	1.32422	-40.5	1.31561	-40.5	1.43829	-40.4	1.10236
-40.4	2.33203	-40.2	1.78436	-40.4	1.45703	-40.2	1.09766	-40.3	1.27109	-40.4	1.33282	-40.4	1.40936	-40.3	1.13361
-40.3	2.28046	-40.1	1.7547	-40.3	1.46875	-40.1	1.10388	-40.2	1.19922	-40.3	1.34454	-40.3	1.36719	-40.2	1.16016
-40.2	2.21796	-40	1.73047	-40.2	1.51013	-40	1.08594	-40.1	1.12732	-40.2	1.34766	-40.2	1.31641	-40.1	1.12421
-40.1	2.14923	-39.9	1.71014	-40.1	1.59296	-39.9	0.981232	-40	1.08124	-40.1	1.31094	-40.1	1.27655	-40	1.01874
-40	2.08124	-39.8	1.71954	-40	1.42657	-39.8	0.806244	-39.9	1.0531	-40	1.17499	-40	1.24219	-39.9	0.833588
-39.9	2.01093	-39.7	1.69922	-39.9	1.08362	-39.7	0.611694	-39.8	1.03827	-39.9	0.978119	-39.9	1.21014	-39.8	0.631256
-39.8	1.93359	-39.6	1.68439	-39.8	0.823425	-39.6	0.485931	-39.7	1.02344	-39.8	0.8078	-39.8	1.16406	-39.7	0.519531
-39.7	1.86951	-39.5	1.67578	-39.7	0.678894	-39.5	0.413269	-39.6	0.989838	-39.7	0.707031	-39.7	1.125	-39.6	0.453125
-39.6	1.80157	-39.4	1.67108	-39.6	0.668762	-39.4	0.4617	-39.5	0.949219	-39.6	0.6922	-39.6	1.09845	-39.5	0.469543
-39.5	1.79688	-39.3	1.64923	-39.5	0.755493	-39.3	0.571075	-39.4	0.949219	-39.5	0.746094	-39.5	1.06561	-39.4	0.547668
-39.4	1.8125	-39.2	1.65155	-39.4	0.871094	-39.2	0.660156	-39.3	0.976563	-39.4	0.806244	-39.4	1.07501	-39.3	0.625
-39.3	1.84924	-39.1	1.65393	-39.3	0.938293	-39.1	0.737488	-39.2	1.02264	-39.3	0.842957	-39.3	1.11017	-39.2	0.688293
-39.2	1.90234	-39	1.67108	-39.2	0.996887	-39	0.81015	-39.1	1.06171	-39.2	0.884369	-39.2	1.15625	-39.1	0.746887
-39.1	1.94611	-38.9	1.67346	-39.1	1.03986	-38.9	0.858582	-39	1.07813	-39.1	0.922668	-39.1	1.1875	-39	0.796875
-39	1.98126	-38.8	1.69061	-39	1.07422	-38.8	0.921875	-38.9	1.09766	-39	0.949219	-39	1.20392	-38.9	0.813293
-38.9	1.99298	-38.7	1.70782	-38.9	1.11798	-38.7	0.976563	-38.8	1.10468	-38.9	0.965637	-38.9	1.19922	-38.8	0.828125
-38.8	2.00311	-38.6	1.73438	-38.8	1.16095	-38.6	1.01874	-38.7	1.09686	-38.8	0.96405	-38.8	1.19611	-38.7	0.836731
-38.7	2.02032	-38.5	1.75159	-38.7	1.1922	-38.5	1.03906	-38.6	1.09686	-38.7	0.97345	-38.7	1.19141	-38.6	0.832031
-38.6	2.03516	-38.4	1.78516	-38.6	1.23126	-38.4	1.03436	-38.5	1.08514	-38.6	0.976563	-38.6	1.17969	-38.5	0.832031
-38.5	2.05157	-38.3	1.80469	-38.5	1.23358	-38.3	1.03436	-38.4	1.08984	-38.5	1.00079	-38.5	1.17499	-38.4	0.832825
-38.4	2.06641	-38.2	1.82422	-38.4	1.23126	-38.2	1.04218	-38.3	1.09296	-38.4	1.03906	-38.4	1.16486	-38.3	0.854675
-38.3	2.08282	-38.1	1.84534	-38.3	1.2547	-38.1	1.03906	-38.2	1.10938	-38.3	1.05548	-38.3	1.16016	-38.2	0.876556
-38.2	2.07031	-38	1.84296	-38.2	1.26172	-38	1.02966	-38.1	1.11951	-38.2	1.07501	-38.2	1.16486	-38.1	0.893738
-38.1	2.05389	-37.9	1.83594	-38.1	1.26093	-37.9	1.02734	-38	1.11404	-38.1	1.06561	-38.1	1.17188	-38	0.910156
-38	2.04688	-37.8	1.84064	-38	1.26563	-37.8	1.03436	-37.9	1.11639	-38	1.05859	-38	1.17267	-37.9	0.91095
-37.9	2.03204	-37.7	1.83594	-37.9	1.27032	-37.7	1.04218	-37.8	1.11169	-37.9	1.07031	-37.9	1.17969	-37.8	0.929688
-37.8	2.03595	-37.6	1.83594	-37.8	1.29688	-37.6	1.03906	-37.7	1.10468	-37.8	1.07501	-37.8	1.17969	-37.7	0.926575
-37.7	2.03436	-37.5	1.84375	-37.7	1.31329	-37.5	1.04608	-37.6	1.09451	-37.7	1.05859	-37.7	1.19611	-37.6	0.929688
-37.6	2.02734	-37.4	1.83282	-37.6	1.31329	-37.4	1.04919	-37.5	1.09216	-37.6	1.05859	-37.6	1.19843	-37.5	0.926575
-37.5	2.03204	-37.3	1.82813	-37.5	1.30389	-37.3	1.04688	-37.4	1.08514	-37.5	1.07501	-37.5	1.1875	-37.4	0.917175
-37.4	2.03436	-37.2	1.80859	-37.4	1.29688	-37.2	1.05389	-37.3	1.07343	-37.4	1.08203	-37.4	1.19611	-37.3	0.907043
-37.3	2.03516	-37.1	1.79688	-37.3	1.30859	-37.1	1.06171	-37.2	1.07031	-37.3	1.07031	-37.3	1.18671	-37.2	0.894531
-37.2	2.03204	-37	1.78046	-37.2	1.31329	-37	1.06171	-37.1	1.06091	-37.2	1.07031	-37.2	1.17657	-37.1	0.878113
-37.1	2.02423	-36.9	1.77032	-37.1	1.31641	-36.9	1.07031	-37	1.0625	-37.1	1.07031	-37.1	1.16016	-37	0.856262
-37	2.01483	-36.8	1.76953	-37	1.31641	-36.8	1.07343	-36.9	1.03827	-37	1.07501	-37	1.16016	-36.9	0.84375
-36.9	2.02032	-36.7	1.75079	-36.9	1.32813	-36.7	1.06873	-36.8	1.03436	-36.9	1.07031	-36.9	1.14844	-36.8	0.835144
-36.8	2.03125	-36.6	1.75781	-36.8	1.34064	-36.6	1.07108	-36.7	1.02655	-36.8	1.06561	-36.8	1.14063	-36.7	0.839844
-36.7	2.01953	-36.5	1.76093	-36.7	1.34454	-36.5	1.08826	-36.6	1.02264	-36.7	1.07187	-36.7	1.12579	-36.6	0.844543
-36.6	2.02264	-36.4	1.76721	-36.6	1.34766	-36.4	1.08594	-36.5	1.03436	-36.6	1.07733	-36.6	1.11639	-36.5	0.836731
-36.5	2.01251	-36.3	1.75311	-36.5	1.37189	-36.3	1.09296	-36.4	1.04218	-36.5	1.07813	-36.5	1.10938	-36.4	0.835144
-36.4	2	-36.2	1.74298	-36.4	1.39374	-36.2	1.10938	-36.3	1.03906	-36.4	1.07813	-36.4	1.10626	-36.3	0.839844
-36.3	1.99609	-36.1	1.74139	-36.3	1.40314	-36.1	1.12421	-36.2	1.03125	-36.3	1.08984	-36.3	1.10156	-36.2	0.836731
-36.2	1.99298	-36	1.73126	-36.2	1.39844	-36	1.11951	-36.1	1.02655	-36.2	1.09454	-36.2	1.10938	-36.1	0.839844
-36.1	1.98358	-35.9	1.72656	-36.1	1.41016	-35.9	1.11719	-36	1.02655	-36.1	1.09766	-36.1	1.10938	-36	0.851563
-36	1.97345	-35.8	1.72186	-36	1.41797	-35.8	1.12421	-35.9	1.02966	-36	1.09454	-36	1.11407	-35.9	0.859375
-35.9	1.97656	-35.7	1.71173	-35.9	1.41486	-35.7	1.13202	-35.8	1.03592	-35.9	1.08984	-35.9	1.11798	-35.8	0.859375
-35.8	1.97656	-35.6	1.71484	-35.8	1.40546	-35.6	1.12891	-35.7	1.03827	-35.8	1.08984	-35.8	1.12421	-35.7	0.867188
-35.7	1.98517	-35.5	1.70703	-35.7	1.39844	-35.5	1.13593	-35.6	1.04138	-35.7	1.08673	-35.7	1.12891	-35.6	0.868744
-35.6	1.98047	-35.4	1.69531	-35.6	1.38361	-35.4	1.14374	-35.5	1.04608	-35.6	1.07733	-35.6	1.13672	-35.5	0.878113
-35.5	1.98358	-35.3	1.6922	-35.5	1.38593	-35.3	1.15857	-35.4	1.03906	-35.5	1.07501	-35.5	1.14142	-35.4	0.878906
-35.4	1.96173	-35.2	1.67969	-35.4	1.37189	-35.2	1.16406	-35.3	1.04608	-35.4	1.07733	-35.4	1.15704	-35.3	0.875793
-35.3	1.95703	-35.1	1.67578	-35.3	1.35938	-35.1	1.17969	-35.2	1.04297	-35.3	1.0672	-35.3	1.16016	-35.2	0.871094
-35.2	1.96564	-35	1.67578	-35.2	1.36407	-35	1.1781	-35.1	1.04138	-35.2	1.0625	-35.2	1.15546	-35.1	0.874207
-35.1	1.96094	-34.9	1.68359	-35.1	1.35938	-34.9	1.16797	-35	1.03436	-35.1	1.05859	-35.1	1.15314	-35	0.875793
-35	1.96405	-34.8	1.68359	-35	1.37109	-34.8	1.17029	-34.9	1.04218	-35	1.05548	-35	1.16797	-34.9	0.875793
-34.9	1.95703	-34.7	1.6922	-34.9	1.37109	-34.7	1.16797	-34.8	1.05389	-34.9	1.0578	-34.9	1.17969	-34.8	0.874207
-34.8	1.95392	-34.6	1.6875	-34.8	1.36719	-34.6	1.1828	-34.7	1.05078	-34.8	1.05078	-34.8	1.18439	-34.7	0.875793
-34.7	1.95233	-34.5	1.6922	-34.7	1.37579	-34.5	1.17499	-34.6	1.06561	-34.7	1.03906	-34.7	1.19141	-34.6	0.874207
-34.6	1.9422	-34.4	1.6828	-34.6	1.36639	-34.4	1.16327	-34.5	1.07343	-34.6	1.03595	-34.6	1.19141	-34.5	0.878906
-34.5	1.9422	-34.3	1.66406	-34.5	1.36719	-34.3	1.16797	-34.4	1.07343	-34.5	1.03125	-34.5	1.19611	-34.4	0.875793
-34.4	1.94452	-34.2	1.66095	-34.4	1.35938	-34.2	1.16327	-34.3	1.08984	-34.4	1.03125	-34.4	1.19141	-34.3	0.867981
-34.3	1.93439	-34.1	1.65625	-34.3	1.36407	-34.1	1.17029	-34.2	1.10468	-34.3	1.01642	-34.3	1.19452	-34.2	0.871094
-34.2	1.9328	-34	1.64844	-34.2	1.35156	-34	1.17264	-34.1	1.09686	-34.2	1.00702	-34.2	1.18439	-34.1	0.871094
-34.1	1.91486	-33.9	1.64453	-34.1	1.33984	-33.9	1.16718	-34	1.08984	-34.1	1	-34.1	1.19141	-34	0.878906
-34	1.91797	-33.8	1.64453	-34	1.33984	-33.8	1.15076	-33.9	1.09686	-34	1.01251	-34	1.19141	-33.9	0.890625
-33.9	1.91486	-33.7	1.63672	-33.9	1.33984	-33.7	1.15155	-33.8	1.09216	-33.9	1.01642	-33.9	1.18439	-33.8	0.890625
-33.8	1.90546	-33.6	1.625	-33.8	1.33673	-33.6	1.14374	-33.7	1.08203	-33.8	1.01874	-33.8	1.19141	-33.7	0.895325
-33.7	1.90625	-33.5	1.625	-33.7	1.33514	-33.5	1.12891	-33.6	1.08514	-33.7	1.01642	-33.7	1.19922	-33.6	0.905457
-33.6	1.90314	-33.4	1.62189	-33.6	1.32031	-33.4	1.11951	-33.5	1.08514	-33.6	1.00702	-33.6	1.19611	-33.5	0.895325
-33.5	1.89374	-33.3	1.62189	-33.5	1.31641	-33.3	1.10938	-33.4	1.08984	-33.5	0.996887	-33.5	1.20313	-33.4	0.902344
-33.4	1.88361	-33.2	1.61249	-33.4	1.32501	-33.2	1.10468	-33.3	1.08905	-33.4	1	-33.4	1.20624	-33.3	0.902344
-33.3	1.88202	-33.1	1.60236	-33.3	1.32813	-33.1	1.09296	-33.2	1.08514	-33.3	0.9953	-33.3	1.19611	-33.2	0.898438
-33.2	1.86719	-33	1.59296	-33.2	1.32031	-33	1.09296	-33.1	1.07343	-33.2	0.985168	-33.2	1.19922	-33.1	0.902344
-33.1	1.85236	-32.9	1.59064	-33.1	1.31561	-32.9	1.09766	-33	1.08203	-33.1	0.985168	-33.1	1.21094	-33	0.890625
-33	1.84454	-32.8	1.58984	-33	1.31329	-32.8	1.10468	-32.9	1.07263	-33	0.980469	-33	1.21094	-32.9	0.898438
-32.9	1.83514	-32.7	1.57343	-32.9	1.30548	-32.7	1.09998	-32.8	1.07031	-32.9	0.987488	-32.9	1.21875	-32.8	0.895325
-32.8	1.82031	-32.6	1.57111	-32.8	1.30389	-32.6	1.07813	-32.7	1.06091	-32.8	0.985168	-32.8	1.21094	-32.7	0.910156
-32.7	1.80859	-32.5	1.56171	-32.7	1.28906	-32.5	1.06561	-32.6	1.0625	-32.7	0.987488	-32.7	1.19611	-32.6	0.907043
-32.6	1.79688	-32.4	1.55939	-32.6	1.28595	-32.4	1.04919	-32.5	1.06561	-32.6	0.985168	-32.6	1.18671	-32.5	0.905457
-32.5	1.78204	-32.3	1.55469	-32.5	1.28436	-32.3	1.04688	-32.4	1.0578	-32.5	0.987488	-32.5	1.1875	-32.4	0.910156
-32.4	1.77264	-32.2	1.55859	-32.4	1.27423	-32.2	1.03906	-32.3	1.04297	-32.4	0.989838	-32.4	1.17657	-32.3	0.914856
-32.3	1.76251	-32.1	1.55469	-32.3	1.26953	-32.1	1.02966	-32.2	1.03046	-32.3	1.01172	-32.3	1.17969	-32.2	0.910156
-32.2	1.76172	-32	1.55157	-32.2	1.25781	-32	1.01483	-32.1	1.02185	-32.2	1.00702	-32.2	1.17657	-32.1	0.907043
-32.1	1.74609	-31.9	1.54218	-32.1	1.26642	-31.9	1	-32	1.01172	-32.1	1.00781	-32.1	1.17188	-32	0.917175
-32	1.74609	-31.8	1.53204	-32	1.26483	-31.8	0.998413	-31.9	1.00232	-32	1.02109	-32	1.17188	-31.9	0.902344
-31.9	1.74298	-31.7	1.52264	-31.9	1.2547	-31.7	0.96875	-31.8	0.987488	-31.9	1.03827	-31.9	1.17969	-31.8	0.907043
-31.8	1.73358	-31.6	1.51721	-31.8	1.26172	-31.6	0.959351	-31.7	0.972656	-31.8	1.03906	-31.8	1.1875	-31.7	0.897644
-31.7	1.72345	-31.5	1.51563	-31.7	1.25311	-31.5	0.949219	-31.6	0.959351	-31.7	1.04767	-31.7	1.17969	-31.6	0.895325
-31.6	1.71875	-31.4	1.52734	-31.6	1.24609	-31.4	0.949219	-31.5	0.960938	-31.6	1.03516	-31.6	1.16486	-31.5	0.897644
-31.5	1.71564	-31.3	1.51953	-31.5	1.24298	-31.3	0.939819	-31.4	0.951538	-31.5	1.02655	-31.5	1.17188	-31.4	0.895325
-31.4	1.71405	-31.2	1.50311	-31.4	1.23828	-31.2	0.9328	-31.3	0.946075	-31.4	1.01953	-31.4	1.16718	-31.3	0.885925
-31.3	1.69922	-31.1	1.48907	-31.3	1.24298	-31.1	0.929688	-31.2	0.943726	-31.3	1.01642	-31.3	1.15781	-31.2	0.875793
-31.2	1.6875	-31	1.48126	-31.2	1.23358	-31	0.924988	-31.1	0.924988	-31.2	1.00861	-31.2	1.14764	-31.1	0.875793
-31.1	1.67969	-30.9	1.48358	-31.1	1.22345	-30.9	0.928101	-31	0.913269	-31.1	0.9953	-31.1	1.14532	-31	0.882813
-31	1.66486	-30.8	1.48126	-31	1.21094	-30.8	0.917969	-30.9	0.902344	-31	0.985168	-31	1.14764	-30.9	0.878113
-30.9	1.65546	-30.7	1.46405	-30.9	1.19452	-30.7	0.913269	-30.8	0.881226	-30.9	0.975769	-30.9	1.13751	-30.8	0.875793
-30.8	1.64142	-30.6	1.45001	-30.8	1.1875	-30.6	0.905457	-30.7	0.866394	-30.8	0.965637	-30.8	1.14063	-30.7	0.871094
-30.7	1.63202	-30.5	1.44061	-30.7	1.18439	-30.5	0.890625	-30.6	0.854675	-30.7	0.960938	-30.7	1.13593	-30.6	0.878906
-30.6	1.62189	-30.4	1.43048	-30.6	1.16797	-30.4	0.878113	-30.5	0.832031	-30.6	0.953125	-30.6	1.14142	-30.5	0.890625
-30.5	1.61407	-30.3	1.41016	-30.5	1.17188	-30.3	0.862488	-30.4	0.818726	-30.5	0.936707	-30.5	1.13751	-30.4	0.887512
-30.4	1.60468	-30.2	1.38672	-30.4	1.15314	-30.2	0.862488	-30.3	0.808594	-30.4	0.929688	-30.4	1.13281	-30.3	0.882813
-30.3	1.60236	-30.1	1.38361	-30.3	1.16016	-30.1	0.869507	-30.2	0.800781	-30.3	0.914856	-30.3	1.11639	-30.2	0.882813
-30.2	1.59296	-30	1.36249	-30.2	1.14374	-30	0.871857	-30.1	0.803101	-30.2	0.902344	-30.2	1.10626	-30.1	0.866394
-30.1	1.58282	-29.9	1.35236	-30.1	1.13361	-29.9	0.869507	-30	0.800781	-30.1	0.887512	-30.1	1.10938	-30	0.856262
-30	1.58984	-29.8	1.35077	-30	1.12891	-29.8	0.859375	-29.9	0.796082	-30	0.890625	-30	1.10156	-29.9	0.84845
-29.9	1.59296	-29.7	1.34375	-29.9	1.12579	-29.7	0.862488	-29.8	0.788269	-29.9	0.897644	-29.9	1.07813	-29.8	0.83905
-29.8	1.59064	-29.6	1.34064	-29.8	1.12891	-29.6	0.857788	-29.7	0.784363	-29.8	0.887512	-29.8	1.08673	-29.7	0.828125
-29.7	1.58594	-29.5	1.33124	-29.7	1.12109	-29.5	0.867188	-29.6	0.78125	-29.7	0.885925	-29.7	1.07733	-29.6	0.825012
-29.6	1.58984	-29.4	1.32111	-29.6	1.12109	-29.4	0.878906	-29.5	0.77655	-29.6	0.875793	-29.6	1.07501	-29.5	0.820313
-29.5	1.57501	-29.3	1.29376	-29.5	1.11249	-29.3	0.874207	-29.4	0.771851	-29.5	0.871094	-29.5	1.0625	-29.4	0.815613
-29.4	1.56561	-29.2	1.27734	-29.4	1.10236	-29.2	0.869507	-29.3	0.769531	-29.4	0.871094	-29.4	1.04608	-29.3	0.813293
-29.3	1.56329	-29.1	1.27734	-29.3	1.09454	-29.1	0.867188	-29.2	0.771851	-29.3	0.856262	-29.3	1.03595	-29.2	0.805481
-29.2	1.55859	-29	1.26093	-29.2	1.08514	-29	0.869507	-29.1	0.761719	-29.2	0.846863	-29.2	1.03906	-29.1	0.8125
-29.1	1.55859	-28.9	1.25549	-29.1	1.07501	-28.9	0.859375	-29	0.757019	-29.1	0.839844	-29.1	1.04767	-29	0.800781
-29	1.55548	-28.8	1.24609	-29	1.06561	-28.8	0.859375	-28.9	0.761719	-29	0.836731	-29	1.03827	-28.9	0.8078
-28.9	1.55389	-28.7	1.23828	-28.9	1.05859	-28.7	0.869507	-28.8	0.752319	-28.9	0.832031	-28.9	1.03906	-28.8	0.796875
-28.8	1.54376	-28.6	1.23358	-28.8	1.05859	-28.6	0.867188	-28.7	0.764832	-28.8	0.832031	-28.8	1.01953	-28.7	0.805481
-28.7	1.54688	-28.5	1.21484	-28.7	1.05939	-28.5	0.874207	-28.6	0.769531	-28.7	0.8125	-28.7	1.0047	-28.6	0.789063
-28.6	1.55859	-28.4	1.21643	-28.6	1.06329	-28.4	0.874207	-28.5	0.789063	-28.6	0.800781	-28.6	0.9953	-28.5	0.78595
-28.5	1.56329	-28.3	1.21405	-28.5	1.05859	-28.3	0.882019	-28.4	0.796082	-28.5	0.797668	-28.5	0.980469	-28.4	0.753906
-28.4	1.55859	-28.2	1.19531	-28.4	1.05859	-28.2	0.890625	-28.3	0.796082	-28.4	0.800781	-28.4	0.953918	-28.3	0.75
-28.3	1.55859	-28.1	1.19531	-28.3	1.05859	-28.1	0.896851	-28.2	0.803894	-28.3	0.8125	-28.3	0.941406	-28.2	0.75
-28.2	1.56952	-28	1.18359	-28.2	1.06641	-28	0.898438	-28.1	0.815613	-28.2	0.815613	-28.2	0.924988	-28.1	0.758606
-28.1	1.58752	-27.9	1.18518	-28.1	1.06641	-27.9	0.90155	-28	0.828125	-28.1	0.813293	-28.1	0.919525	-28	0.753113
-28	1.58514	-27.8	1.1828	-28	1.07501	-27.8	0.90155	-27.9	0.835144	-28	0.828125	-28	0.924988	-27.9	0.7547
-27.9	1.58282	-27.7	1.17267	-27.9	1.07031	-27.7	0.910156	-27.8	0.846863	-27.9	0.836731	-27.9	0.926575	-27.8	0.75
-27.8	1.57031	-27.6	1.16797	-27.8	1.07031	-27.6	0.908569	-27.7	0.846863	-27.8	0.839844	-27.8	0.921875	-27.7	0.75
-27.7	1.55859	-27.5	1.17108	-27.7	1.05548	-27.5	0.90625	-27.6	0.866394	-27.7	0.835144	-27.7	0.917175	-27.6	0.761719
-27.6	1.56171	-27.4	1.16565	-27.6	1.05078	-27.4	0.910156	-27.5	0.871094	-27.6	0.8414	-27.6	0.907806	-27.5	0.769531
-27.5	1.56329	-27.3	1.17108	-27.5	1.05389	-27.3	0.905457	-27.4	0.874207	-27.5	0.846863	-27.5	0.902344	-27.4	0.769531
-27.4	1.56329	-27.2	1.17578	-27.4	1.04688	-27.2	0.900757	-27.3	0.874207	-27.4	0.839844	-27.4	0.902344	-27.3	0.769531
-27.3	1.55389	-27.1	1.18359	-27.3	1.05548	-27.1	0.898438	-27.2	0.882813	-27.3	0.847656	-27.3	0.910156	-27.2	0.7789
-27.2	1.55548	-27	1.18518	-27.2	1.04688	-27	0.893738	-27.1	0.878113	-27.2	0.856262	-27.2	0.910156	-27.1	0.77655
-27.1	1.54688	-26.9	1.20703	-27.1	1.05859	-26.9	0.893738	-27	0.874207	-27.1	0.871094	-27.1	0.907043	-27	0.769531
-27	1.54218	-26.8	1.20703	-27	1.05548	-26.8	0.90155	-26.9	0.874207	-27	0.867981	-27	0.885925	-26.9	0.774231
-26.9	1.54376	-26.7	1.22656	-26.9	1.05078	-26.7	0.910156	-26.8	0.885925	-26.9	0.866394	-26.9	0.875793	-26.8	0.764832
-26.8	1.53906	-26.6	1.21484	-26.8	1.05078	-26.6	0.908569	-26.7	0.885925	-26.8	0.878906	-26.8	0.890625	-26.7	0.7547
-26.7	1.53906	-26.5	1.22656	-26.7	1.04376	-26.5	0.90155	-26.6	0.871094	-26.7	0.875793	-26.7	0.874207	-26.6	0.758606
-26.6	1.53516	-26.4	1.22345	-26.6	1.04608	-26.4	0.910156	-26.5	0.874207	-26.6	0.882813	-26.6	0.875793	-26.5	0.757019
-26.5	1.53204	-26.3	1.21484	-26.5	1.02734	-26.3	0.893738	-26.4	0.874207	-26.5	0.890625	-26.5	0.874207	-26.4	0.746887
-26.4	1.52264	-26.2	1.21484	-26.4	1.02734	-26.2	0.90155	-26.3	0.885925	-26.4	0.887512	-26.4	0.864075	-26.3	0.742188
-26.3	1.51251	-26.1	1.21954	-26.3	1.02893	-26.1	0.898438	-26.2	0.893738	-26.3	0.890625	-26.3	0.871094	-26.2	0.75
-26.2	1.50311	-26	1.23828	-26.2	1.01953	-26	0.893738	-26.1	0.890625	-26.2	0.902344	-26.2	0.875793	-26.1	0.757019
-26.1	1.49298	-25.9	1.23358	-26.1	1.02655	-25.9	0.889038	-26	0.897644	-26.1	0.897644	-26.1	0.871094	-26	0.759369
-26	1.48517	-25.8	1.23126	-26	1.02423	-25.8	0.878906	-25.9	0.900757	-26	0.899994	-26	0.871094	-25.9	0.768738
-25.9	1.47577	-25.7	1.22656	-25.9	1.01172	-25.7	0.882019	-25.8	0.890625	-25.9	0.905457	-25.9	0.878906	-25.8	0.766418
-25.8	1.46173	-25.6	1.21875	-25.8	1	-25.6	0.874207	-25.7	0.893738	-25.8	0.898438	-25.8	0.890625	-25.7	0.764832
-25.7	1.45233	-25.5	1.21173	-25.7	0.9953	-25.5	0.871094	-25.6	0.890625	-25.7	0.907043	-25.7	0.895325	-25.6	0.769531
-25.6	1.4422	-25.4	1.20703	-25.6	0.985168	-25.4	0.857788	-25.5	0.881226	-25.6	0.902344	-25.6	0.902344	-25.5	0.766418
-25.5	1.4375	-25.3	1.21875	-25.5	0.97345	-25.3	0.859375	-25.4	0.882019	-25.5	0.890625	-25.5	0.905457	-25.4	0.769531
-25.4	1.43439	-25.2	1.22186	-25.4	0.975769	-25.2	0.849976	-25.3	0.871094	-25.4	0.885925	-25.4	0.91095	-25.3	0.778137
-25.3	1.42499	-25.1	1.21484	-25.3	0.957031	-25.1	0.859375	-25.2	0.874207	-25.3	0.883606	-25.3	0.929688	-25.2	0.768738
-25.2	1.41486	-25	1.21954	-25.2	0.965637	-25	0.862488	-25.1	0.871094	-25.2	0.875793	-25.2	0.929688	-25.1	0.766418
-25.1	1.40546	-24.9	1.21484	-25.1	0.96405	-24.9	0.854675	-25	0.861694	-25.1	0.878113	-25.1	0.949219	-25	0.764832
-25	1.38361	-24.8	1.21173	-25	0.958618	-24.8	0.839844	-24.9	0.859375	-25	0.875793	-25	0.953918	-24.9	0.766418
-24.9	1.37421	-24.7	1.22656	-24.9	0.956238	-24.7	0.838257	-24.8	0.849976	-24.9	0.871094	-24.9	0.956238	-24.8	0.764832
-24.8	1.36407	-24.6	1.22186	-24.8	0.953918	-24.6	0.839844	-24.7	0.851563	-24.8	0.866394	-24.8	0.946106	-24.7	0.766418
-24.7	1.36249	-24.5	1.21173	-24.7	0.936707	-24.5	0.835144	-24.6	0.842163	-24.7	0.856262	-24.7	0.949219	-24.6	0.769531
-24.6	1.35706	-24.4	1.21173	-24.6	0.925781	-24.4	0.830444	-24.5	0.844513	-24.6	0.846863	-24.6	0.965637	-24.5	0.766418
-24.5	1.34296	-24.3	1.22186	-24.5	0.922668	-24.3	0.828125	-24.4	0.853882	-24.5	0.844543	-24.5	0.972656	-24.4	0.764832
-24.4	1.33594	-24.2	1.21173	-24.4	0.924988	-24.2	0.828125	-24.3	0.851563	-24.4	0.836731	-24.4	0.975769	-24.3	0.766418
-24.3	1.32813	-24.1	1.21405	-24.3	0.922668	-24.1	0.835144	-24.2	0.849976	-24.3	0.835144	-24.3	0.978119	-24.2	0.757019
-24.2	1.31329	-24	1.21173	-24.2	0.917969	-24	0.838257	-24.1	0.851563	-24.2	0.820313	-24.2	0.987488	-24.1	0.7547
-24.1	1.29218	-23.9	1.21014	-24.1	0.9375	-23.9	0.839844	-24	0.861694	-24.1	0.8172	-24.1	0.988281	-24	0.75
-24	1.29688	-23.8	1.21173	-24	0.934387	-23.8	0.842957	-23.9	0.859375	-24	0.815613	-24	0.985168	-23.9	0.746887
-23.9	1.29846	-23.7	1.22186	-23.9	0.9375	-23.7	0.849976	-23.8	0.866394	-23.9	0.805481	-23.9	1	-23.8	0.7453
-23.8	1.29608	-23.6	1.21173	-23.8	0.949219	-23.6	0.852325	-23.7	0.871094	-23.8	0.8078	-23.8	0.9953	-23.7	0.746887
-23.7	1.28204	-23.5	1.21484	-23.7	0.941406	-23.5	0.849976	-23.6	0.861694	-23.7	0.793762	-23.7	1.0047	-23.6	0.737488
-23.6	1.28906	-23.4	1.21173	-23.6	0.949219	-23.4	0.847656	-23.5	0.871094	-23.6	0.789063	-23.6	1.00781	-23.5	0.730469
-23.5	1.28906	-23.3	1.21405	-23.5	0.953918	-23.3	0.854675	-23.4	0.874207	-23.5	0.792969	-23.5	1.01172	-23.4	0.727356
-23.4	1.27423	-23.2	1.20001	-23.4	0.960938	-23.2	0.854675	-23.3	0.881226	-23.4	0.78125	-23.4	1.01953	-23.3	0.725769
-23.3	1.27264	-23.1	1.20233	-23.3	0.96875	-23.1	0.842957	-23.2	0.878906	-23.3	0.778137	-23.3	1.02423	-23.2	0.727356
-23.2	1.27734	-23	1.1922	-23.2	0.977356	-23	0.849976	-23.1	0.893738	-23.2	0.764832	-23.2	1.02344	-23.1	0.725769
-23.1	1.27423	-22.9	1.19531	-23.1	0.975769	-22.9	0.847656	-23	0.902344	-23.1	0.766418	-23.1	1.01483	-23	0.72345
-23	1.27264	-22.8	1.1922	-23	0.988281	-22.8	0.839844	-22.9	0.900757	-23	0.757019	-23	1.01642	-22.9	0.727356
-22.9	1.26251	-22.7	1.19061	-22.9	0.985168	-22.7	0.838257	-22.8	0.910156	-22.9	0.746887	-22.9	1.02344	-22.8	0.737488
-22.8	1.25311	-22.6	1.1875	-22.8	0.9953	-22.6	0.828125	-22.7	0.912476	-22.8	0.735168	-22.8	1.01953	-22.7	0.727356
-22.7	1.25549	-22.5	1.18048	-22.7	0.985168	-22.5	0.835144	-22.6	0.910156	-22.7	0.725769	-22.7	1.03125	-22.6	0.730469
-22.6	1.26483	-22.4	1.1828	-22.6	0.983582	-22.4	0.830444	-22.5	0.912476	-22.6	0.715637	-22.6	1.02814	-22.5	0.737488
-22.5	1.25781	-22.3	1.18048	-22.5	0.985168	-22.3	0.828125	-22.4	0.910156	-22.5	0.717957	-22.5	1.02655	-22.4	0.735168
-22.4	1.26251	-22.2	1.1828	-22.4	0.985168	-22.2	0.820313	-22.3	0.913269	-22.4	0.707825	-22.4	1.01642	-22.3	0.730469
-22.3	1.26953	-22.1	1.17578	-22.3	0.972656	-22.1	0.830444	-22.2	0.921875	-22.3	0.706238	-22.3	1.00702	-22.2	0.730469
-22.2	1.27264	-22	1.16797	-22.2	0.96405	-22	0.828125	-22.1	0.920288	-22.2	0.684387	-22.2	0.996887	-22.1	0.71875
-22.1	1.27423	-21.9	1.14923	-22.1	0.96875	-21.9	0.830444	-22	0.921875	-22.1	0.674988	-22.1	0.987488	-22	0.715637
-22	1.27423	-21.8	1.15314	-22	0.96875	-21.8	0.820313	-21.9	0.920288	-22	0.657043	-22	0.97345	-21.9	0.710938
-21.9	1.26483	-21.7	1.15155	-21.9	0.953918	-21.7	0.818726	-21.8	0.921875	-21.9	0.648438	-21.9	0.960938	-21.8	0.71405
-21.8	1.26251	-21.6	1.13672	-21.8	0.944519	-21.6	0.808594	-21.7	0.917175	-21.8	0.645325	-21.8	0.949219	-21.7	0.715637
-21.7	1.25781	-21.5	1.13672	-21.7	0.934387	-21.5	0.811707	-21.6	0.920288	-21.7	0.640625	-21.7	0.946106	-21.6	0.710938
-21.6	1.26483	-21.4	1.13672	-21.6	0.9328	-21.4	0.808594	-21.5	0.921875	-21.6	0.635925	-21.6	0.936707	-21.5	0.715637
-21.5	1.26251	-21.3	1.12189	-21.5	0.929688	-21.3	0.810913	-21.4	0.917175	-21.5	0.625793	-21.5	0.926575	-21.4	0.717957
-21.4	1.2547	-21.2	1.11249	-21.4	0.922668	-21.2	0.808594	-21.3	0.910156	-21.4	0.617981	-21.4	0.902344	-21.3	0.707825
-21.3	1.2453	-21.1	1.12189	-21.3	0.914856	-21.1	0.803894	-21.2	0.909363	-21.3	0.608582	-21.3	0.894531	-21.2	0.706238
-21.2	1.24298	-21	1.11249	-21.2	0.905457	-21	0.8078	-21.1	0.900757	-21.2	0.609375	-21.2	0.874207	-21.1	0.696106
-21.1	1.2453	-20.9	1.10236	-21.1	0.883606	-20.9	0.803894	-21	0.885925	-21.1	0.594543	-21.1	0.875793	-21	0.710938
-21	1.24298	-20.8	1.10236	-21	0.874207	-20.8	0.803894	-20.9	0.882813	-21	0.585144	-21	0.866394	-20.9	0.703125
-20.9	1.23828	-20.7	1.09296	-20.9	0.864075	-20.7	0.803894	-20.8	0.866394	-20.9	0.589844	-20.9	0.856262	-20.8	0.696106
-20.8	1.23047	-20.6	1.07813	-20.8	0.854675	-20.6	0.808594	-20.7	0.866394	-20.8	0.586731	-20.8	0.84845	-20.7	0.698425
-20.7	1.22656	-20.5	1.07111	-20.7	0.849243	-20.5	0.799194	-20.6	0.866394	-20.7	0.578918	-20.7	0.835144	-20.6	0.696106
-20.6	1.23517	-20.4	1.06171	-20.6	0.854675	-20.4	0.800781	-20.5	0.849976	-20.6	0.565613	-20.6	0.836731	-20.5	0.683594
-20.5	1.23358	-20.3	1.04688	-20.5	0.844543	-20.3	0.787476	-20.4	0.839844	-20.5	0.555481	-20.5	0.827332	-20.4	0.674988
-20.4	1.24298	-20.2	1.03204	-20.4	0.835144	-20.2	0.789063	-20.3	0.815613	-20.4	0.546082	-20.4	0.825012	-20.3	0.676575
-20.3	1.23358	-20.1	1.03046	-20.3	0.825012	-20.1	0.779663	-20.2	0.800781	-20.3	0.53595	-20.3	0.827332	-20.2	0.691406
-20.2	1.22345	-20	1.02032	-20.2	0.815613	-20	0.777344	-20.1	0.803101	-20.2	0.52655	-20.2	0.8172	-20.1	0.691406
-20.1	1.22186	-19.9	1.00781	-20.1	0.793762	-19.9	0.772644	-20	0.788269	-20.1	0.519531	-20.1	0.803894	-20	0.676575
-20	1.22345	-19.8	0.996094	-20	0.784363	-19.8	0.77655	-19.9	0.757019	-20	0.524231	-20	0.805481	-19.9	0.678894
-19.9	1.21405	-19.7	0.988281	-19.9	0.782043	-19.7	0.769531	-19.8	0.75	-19.9	0.516418	-19.9	0.800781	-19.8	0.691406
-19.8	1.21173	-19.6	0.981262	-19.8	0.777344	-19.6	0.760132	-19.7	0.740601	-19.8	0.523438	-19.8	0.792969	-19.7	0.691406
-19.7	1.20392	-19.5	0.971863	-19.7	0.769531	-19.5	0.75	-19.6	0.725769	-19.7	0.511719	-19.7	0.78125	-19.6	0.676575
-19.6	1.19452	-19.4	0.961731	-19.6	0.7547	-19.4	0.7453	-19.5	0.710938	-19.6	0.511719	-19.6	0.78125	-19.5	0.674988
-19.5	1.1922	-19.3	0.960144	-19.5	0.7453	-19.3	0.740601	-19.4	0.701538	-19.5	0.503906	-19.5	0.769531	-19.4	0.664856
-19.4	1.19141	-19.2	0.961731	-19.4	0.738281	-19.2	0.738281	-19.3	0.686707	-19.4	0.492188	-19.4	0.761719	-19.3	0.655457
-19.3	1.17969	-19.1	0.952332	-19.3	0.72345	-19.1	0.740601	-19.2	0.671875	-19.3	0.496887	-19.3	0.766418	-19.2	0.652344
-19.2	1.17969	-19	0.945313	-19.2	0.71405	-19	0.726563	-19.1	0.659363	-19.2	0.499207	-19.2	0.757019	-19.1	0.649994
-19.1	1.16327	-18.9	0.930481	-19.1	0.72345	-18.9	0.730469	-19	0.639038	-19.1	0.5	-19.1	0.757813	-19	0.647644
-19	1.16095	-18.8	0.922668	-19	0.71875	-18.8	0.721069	-18.9	0.628906	-19	0.496887	-19	0.766418	-18.9	0.645325
-18.9	1.16016	-18.7	0.921082	-18.9	0.715637	-18.7	0.71875	-18.8	0.621094	-18.9	0.4953	-18.9	0.769531	-18.8	0.652344
-18.8	1.14532	-18.6	0.90625	-18.8	0.706238	-18.6	0.721069	-18.7	0.611694	-18.8	0.485168	-18.8	0.789063	-18.7	0.655457
-18.7	1.14374	-18.5	0.90625	-18.7	0.707031	-18.5	0.71875	-18.6	0.596863	-18.7	0.484375	-18.7	0.797668	-18.6	0.645325
-18.6	1.13361	-18.4	0.898438	-18.6	0.703918	-18.4	0.71405	-18.5	0.585144	-18.6	0.480469	-18.6	0.784363	-18.5	0.655457
-18.5	1.12421	-18.3	0.883606	-18.5	0.710938	-18.3	0.709351	-18.4	0.573425	-18.5	0.5	-18.5	0.78595	-18.4	0.653137
-18.4	1.11407	-18.2	0.882019	-18.4	0.707031	-18.2	0.699219	-18.3	0.565613	-18.4	0.5047	-18.4	0.789063	-18.3	0.657043
-18.3	1.10938	-18.1	0.871887	-18.3	0.715637	-18.1	0.697632	-18.2	0.550781	-18.3	0.507019	-18.3	0.78125	-18.2	0.655457
-18.2	1.09296	-18	0.867188	-18.2	0.710938	-18	0.6875	-18.1	0.538269	-18.2	0.516418	-18.2	0.78595	-18.1	0.657043
-18.1	1.09454	-17.9	0.855469	-18.1	0.71875	-17.9	0.691406	-18	0.521851	-18.1	0.519531	-18.1	0.77655	-18	0.652344
-18	1.08984	-17.8	0.847656	-18	0.71875	-17.8	0.678101	-17.9	0.519531	-18	0.52655	-18	0.774231	-17.9	0.660156
-17.9	1.08124	-17.7	0.840637	-17.9	0.72345	-17.7	0.667969	-17.8	0.507019	-17.9	0.540619	-17.9	0.784363	-17.8	0.664063
-17.8	1.08282	-17.6	0.831238	-17.8	0.721863	-17.6	0.667175	-17.7	0.502319	-17.8	0.546082	-17.8	0.78595	-17.7	0.652344
-17.7	1.08282	-17.5	0.821106	-17.7	0.72345	-17.5	0.663269	-17.6	0.488281	-17.7	0.550781	-17.7	0.784363	-17.6	0.655457
-17.6	1.07343	-17.4	0.828125	-17.6	0.741394	-17.4	0.655457	-17.5	0.487488	-17.6	0.547668	-17.6	0.78595	-17.5	0.657043
-17.5	1.07501	-17.3	0.823425	-17.5	0.7547	-17.3	0.639038	-17.4	0.480469	-17.5	0.546082	-17.5	0.792969	-17.4	0.657043
-17.4	1.07031	-17.2	0.821106	-17.4	0.7547	-17.2	0.636719	-17.3	0.482788	-17.4	0.547668	-17.4	0.784363	-17.3	0.655457
-17.3	1.05389	-17.1	0.811707	-17.3	0.75	-17.1	0.635925	-17.2	0.483582	-17.3	0.542969	-17.3	0.78595	-17.2	0.652344
-17.2	1.05157	-17	0.801575	-17.2	0.753113	-17	0.609375	-17.1	0.5	-17.2	0.539063	-17.2	0.800781	-17.1	0.645325
-17.1	1.05859	-16.9	0.804688	-17.1	0.7547	-16.9	0.611694	-17	0.4953	-17.1	0.542969	-17.1	0.805481	-17	0.647644
-17	1.05859	-16.8	0.801575	-17	0.75	-16.8	0.604675	-16.9	0.503906	-17	0.547668	-17	0.796082	-16.9	0.640625
-16.9	1.04688	-16.7	0.792175	-16.9	0.75	-16.7	0.585144	-16.8	0.507019	-16.9	0.546082	-16.9	0.793762	-16.8	0.637512
-16.8	1.05078	-16.6	0.782043	-16.8	0.746887	-16.6	0.570313	-16.7	0.510132	-16.8	0.547668	-16.8	0.784363	-16.7	0.635925
-16.7	1.04376	-16.5	0.780457	-16.7	0.737488	-16.5	0.568726	-16.6	0.522644	-16.7	0.546082	-16.7	0.774231	-16.6	0.625793
-16.6	1.03436	-16.4	0.770325	-16.6	0.735168	-16.4	0.578125	-16.5	0.53125	-16.6	0.547668	-16.6	0.766418	-16.5	0.635925
-16.5	1.02423	-16.3	0.762512	-16.5	0.725769	-16.3	0.565613	-16.4	0.529663	-16.5	0.554688	-16.5	0.768738	-16.4	0.633606
-16.4	1.02264	-16.2	0.753113	-16.4	0.72345	-16.2	0.565613	-16.3	0.539063	-16.4	0.546082	-16.4	0.746887	-16.3	0.637512
-16.3	1.02423	-16.1	0.753906	-16.3	0.725769	-16.1	0.565613	-16.2	0.546082	-16.3	0.547668	-16.3	0.7453	-16.2	0.635925
-16.2	1.01172	-16	0.762512	-16.2	0.715637	-16	0.549194	-16.1	0.553894	-16.2	0.546082	-16.2	0.735168	-16.1	0.640625
-16.1	0.991394	-15.9	0.753113	-16.1	0.702332	-15.9	0.546875	-16	0.565613	-16.1	0.543762	-16.1	0.725769	-16	0.645325
-16	0.992981	-15.8	0.753906	-16	0.703918	-15.8	0.534363	-15.9	0.570313	-16	0.542969	-16	0.715637	-15.9	0.647644
-15.9	0.985168	-15.7	0.750793	-15.9	0.691406	-15.7	0.539063	-15.8	0.568726	-15.9	0.547668	-15.9	0.71875	-15.8	0.645325
-15.8	0.975769	-15.6	0.742981	-15.8	0.6875	-15.6	0.529663	-15.7	0.570313	-15.8	0.546082	-15.8	0.710938	-15.7	0.640625
-15.7	0.97345	-15.5	0.741394	-15.7	0.684387	-15.5	0.539063	-15.6	0.573425	-15.7	0.547668	-15.7	0.710938	-15.6	0.635925
-15.6	0.975769	-15.4	0.734375	-15.6	0.674988	-15.4	0.529663	-15.5	0.582031	-15.6	0.542969	-15.6	0.703125	-15.5	0.633606
-15.5	0.97345	-15.3	0.731262	-15.5	0.664856	-15.3	0.519531	-15.4	0.585144	-15.5	0.538269	-15.5	0.696106	-15.4	0.637512
-15.4	0.960938	-15.2	0.721863	-15.4	0.663269	-15.2	0.529663	-15.3	0.599976	-15.4	0.53595	-15.4	0.694519	-15.3	0.632813
-15.3	0.952332	-15.1	0.719543	-15.3	0.653137	-15.1	0.514832	-15.2	0.601563	-15.3	0.534363	-15.3	0.691406	-15.2	0.635925
-15.2	0.953918	-15	0.710144	-15.2	0.643738	-15	0.507813	-15.1	0.604675	-15.2	0.53125	-15.2	0.676575	-15.1	0.621094
-15.1	0.941406	-14.9	0.711731	-15.1	0.645325	-14.9	0.498413	-15	0.613281	-15.1	0.524231	-15.1	0.667175	-15	0.625793
-15	0.9328	-14.8	0.707031	-15	0.645325	-14.8	0.496094	-14.9	0.623413	-15	0.523438	-15	0.660156	-14.9	0.628113
-14.9	0.922668	-14.7	0.707031	-14.9	0.635925	-14.7	0.5	-14.8	0.621094	-14.9	0.514832	-14.9	0.657043	-14.8	0.625793
-14.8	0.917969	-14.6	0.695313	-14.8	0.633606	-14.6	0.490601	-14.7	0.631226	-14.8	0.524231	-14.8	0.655457	-14.7	0.621094
-14.7	0.914856	-14.5	0.700012	-14.7	0.632813	-14.5	0.488281	-14.6	0.628906	-14.7	0.511719	-14.7	0.653137	-14.6	0.616394
-14.6	0.913269	-14.4	0.690613	-14.6	0.621094	-14.4	0.490601	-14.5	0.628113	-14.6	0.508606	-14.6	0.660156	-14.5	0.614075
-14.5	0.910156	-14.3	0.696899	-14.5	0.621094	-14.3	0.488281	-14.4	0.631226	-14.5	0.4953	-14.5	0.657043	-14.4	0.617981
-14.4	0.903137	-14.2	0.702332	-14.4	0.612488	-14.2	0.498413	-14.3	0.628906	-14.4	0.496887	-14.4	0.655457	-14.3	0.613281
-14.3	0.910156	-14.1	0.707031	-14.3	0.614075	-14.1	0.488281	-14.2	0.632813	-14.3	0.484375	-14.3	0.657043	-14.2	0.608582
-14.2	0.910156	-14	0.695313	-14.2	0.606262	-14	0.488281	-14.1	0.642944	-14.2	0.480469	-14.2	0.652344	-14.1	0.601563
-14.1	0.893738	-13.9	0.695313	-14.1	0.616394	-13.9	0.490601	-14	0.635925	-14.1	0.484375	-14.1	0.635925	-14	0.59845
-14	0.891418	-13.8	0.6922	-14	0.609375	-13.8	0.488281	-13.9	0.643738	-14	0.475769	-14	0.648438	-13.9	0.596863
-13.9	0.893738	-13.7	0.690613	-13.9	0.614075	-13.7	0.490601	-13.8	0.655457	-13.9	0.477356	-13.9	0.645325	-13.8	0.589844
-13.8	0.891418	-13.6	0.695313	-13.8	0.604675	-13.6	0.483582	-13.7	0.640625	-13.8	0.472656	-13.8	0.637512	-13.7	0.586731
-13.7	0.878906	-13.5	0.700012	-13.7	0.606262	-13.5	0.488281	-13.6	0.655457	-13.7	0.460938	-13.7	0.635925	-13.6	0.585144
-13.6	0.875793	-13.4	0.703918	-13.6	0.589844	-13.4	0.490601	-13.5	0.667175	-13.6	0.460938	-13.6	0.625793	-13.5	0.589844
-13.5	0.871094	-13.3	0.702332	-13.5	0.585144	-13.3	0.488281	-13.4	0.662476	-13.5	0.446106	-13.5	0.616394	-13.4	0.582031
-13.4	0.862488	-13.2	0.6922	-13.4	0.570313	-13.2	0.490601	-13.3	0.664825	-13.4	0.456238	-13.4	0.625793	-13.3	0.575012
-13.3	0.852356	-13.1	0.690613	-13.3	0.563293	-13.1	0.488281	-13.2	0.670288	-13.3	0.446106	-13.3	0.616394	-13.2	0.574219
-13.2	0.851563	-13	0.680481	-13.2	0.553894	-13	0.491394	-13.1	0.671875	-13.2	0.453125	-13.2	0.614075	-13.1	0.553894
-13.1	0.842957	-12.9	0.679688	-13.1	0.555481	-12.9	0.503113	-13	0.670288	-13.1	0.449219	-13.1	0.621094	-13	0.555481
-13	0.844543	-12.8	0.671082	-13	0.550781	-12.8	0.503113	-12.9	0.671875	-13	0.453125	-13	0.632813	-12.9	0.550781
-12.9	0.839844	-12.7	0.672668	-12.9	0.539063	-12.7	0.507813	-12.8	0.667175	-12.9	0.441406	-12.9	0.628906	-12.8	0.547668
-12.8	0.823425	-12.6	0.667969	-12.8	0.543762	-12.6	0.510132	-12.7	0.647644	-12.8	0.441406	-12.8	0.637512	-12.7	0.542969
-12.7	0.813293	-12.5	0.671082	-12.7	0.546082	-12.5	0.507813	-12.6	0.639038	-12.7	0.438293	-12.7	0.644531	-12.6	0.542969
-12.6	0.808594	-12.4	0.66095	-12.6	0.543762	-12.4	0.514832	-12.5	0.640625	-12.6	0.436707	-12.6	0.628113	-12.5	0.523438
-12.5	0.800781	-12.3	0.65625	-12.5	0.53125	-12.3	0.519531	-12.4	0.628113	-12.5	0.426575	-12.5	0.632813	-12.4	0.523438
-12.4	0.793762	-12.2	0.653137	-12.4	0.522644	-12.2	0.517944	-12.3	0.621094	-12.4	0.436707	-12.4	0.621094	-12.3	0.515625
-12.3	0.796082	-12.1	0.663269	-12.3	0.512512	-12.1	0.519531	-12.2	0.6203	-12.3	0.421875	-12.3	0.614075	-12.2	0.518738
-12.2	0.789063	-12	0.66095	-12.2	0.514832	-12	0.517944	-12.1	0.611694	-12.2	0.410156	-12.2	0.601563	-12.1	0.511719
-12.1	0.782043	-11.9	0.660156	-12.1	0.512512	-11.9	0.519531	-12	0.596863	-12.1	0.395325	-12.1	0.601563	-12	0.511719
-12	0.784363	-11.8	0.65155	-12	0.516418	-11.8	0.517944	-11.9	0.589844	-12	0.394531	-12	0.582031	-11.9	0.5047
-11.9	0.789063	-11.7	0.653137	-11.9	0.511719	-11.7	0.519531	-11.8	0.58905	-11.9	0.382813	-11.9	0.585144	-11.8	0.503906
-11.8	0.782043	-11.6	0.648438	-11.8	0.4953	-11.6	0.507019	-11.7	0.58905	-11.8	0.382813	-11.8	0.582031	-11.7	0.507019
-11.7	0.784363	-11.5	0.636719	-11.7	0.492981	-11.5	0.5	-11.6	0.580444	-11.7	0.371094	-11.7	0.575012	-11.6	0.492188
-11.6	0.793762	-11.4	0.628906	-11.6	0.492188	-11.4	0.490601	-11.5	0.577332	-11.6	0.354675	-11.6	0.573425	-11.5	0.492188
-11.5	0.800781	-11.3	0.628906	-11.5	0.483582	-11.3	0.483582	-11.4	0.570313	-11.5	0.356262	-11.5	0.570313	-11.4	0.485168
-11.4	0.789063	-11.2	0.6203	-11.4	0.485168	-11.2	0.46405	-11.3	0.569519	-11.4	0.34375	-11.4	0.563293	-11.3	0.484375
-11.3	0.784363	-11.1	0.621887	-11.3	0.480469	-11.1	0.460938	-11.2	0.5578	-11.3	0.336731	-11.3	0.5672	-11.2	0.472656
-11.2	0.782043	-11	0.621887	-11.2	0.483582	-11	0.467957	-11.1	0.553101	-11.2	0.335144	-11.2	0.5625	-11.1	0.472656
-11.1	0.789063	-10.9	0.632019	-11.1	0.47345	-10.9	0.459351	-11	0.546082	-11.1	0.336731	-11.1	0.565613	-11	0.467957
-11	0.793762	-10.8	0.628906	-11	0.472656	-10.8	0.456238	-10.9	0.539063	-11	0.324219	-11	0.5625	-10.9	0.472656
-10.9	0.792969	-10.7	0.621887	-10.9	0.465637	-10.7	0.444519	-10.8	0.52655	-10.9	0.315613	-10.9	0.550781	-10.8	0.457825
-10.8	0.784363	-10.6	0.621094	-10.8	0.453125	-10.6	0.4375	-10.7	0.521851	-10.8	0.3172	-10.8	0.542969	-10.7	0.453125
-10.7	0.782043	-10.5	0.612488	-10.7	0.444519	-10.5	0.424988	-10.6	0.519531	-10.7	0.3125	-10.7	0.53595	-10.6	0.444519
-10.6	0.772644	-10.4	0.617188	-10.6	0.434387	-10.4	0.420288	-10.5	0.507019	-10.6	0.292969	-10.6	0.52655	-10.5	0.441406
-10.5	0.769531	-10.3	0.621887	-10.5	0.436707	-10.3	0.417969	-10.4	0.5	-10.5	0.284363	-10.5	0.511719	-10.4	0.434387
-10.4	0.762512	-10.2	0.617188	-10.4	0.434387	-10.2	0.420288	-10.3	0.502319	-10.4	0.28595	-10.4	0.516418	-10.3	0.441406
-10.3	0.764832	-10.1	0.612488	-10.3	0.424988	-10.1	0.417969	-10.2	0.487488	-10.3	0.297668	-10.3	0.511719	-10.2	0.441406
-10.2	0.762512	-10	0.605469	-10.2	0.414856	-10	0.410156	-10.1	0.480469	-10.2	0.288269	-10.2	0.507019	-10.1	0.433594
-10.1	0.75	-9.9	0.610168	-10.1	0.424988	-9.9	0.405457	-10	0.471069	-10.1	0.300781	-10.1	0.5047	-10	0.424988
-10	0.733582	-9.8	0.609375	-10	0.417969	-9.8	0.389038	-9.9	0.460938	-10	0.305481	-10	0.508606	-9.9	0.426575
-9.9	0.731262	-9.7	0.609375	-9.9	0.414856	-9.7	0.378906	-9.8	0.456238	-9.9	0.292969	-9.9	0.503906	-9.8	0.421875
-9.8	0.735168	-9.6	0.600769	-9.8	0.417969	-9.6	0.369507	-9.7	0.439819	-9.8	0.288269	-9.8	0.507019	-9.7	0.410156
-9.7	0.725769	-9.5	0.597656	-9.7	0.429688	-9.5	0.354675	-9.6	0.441406	-9.7	0.289063	-9.7	0.5047	-9.6	0.407043
-9.6	0.71875	-9.4	0.585938	-9.6	0.426575	-9.4	0.339844	-9.5	0.432007	-9.6	0.28595	-9.6	0.507019	-9.5	0.414063
-9.5	0.699219	-9.3	0.574219	-9.5	0.424988	-9.3	0.338257	-9.4	0.429688	-9.5	0.28125	-9.5	0.511719	-9.4	0.417175
-9.4	0.6875	-9.2	0.571106	-9.4	0.429688	-9.2	0.328125	-9.3	0.433594	-9.4	0.28595	-9.4	0.511719	-9.3	0.410156
-9.3	0.684387	-9.1	0.578125	-9.3	0.422668	-9.1	0.315613	-9.2	0.420288	-9.3	0.285156	-9.3	0.5047	-9.2	0.407043
-9.2	0.679688	-9	0.571106	-9.2	0.421875	-9	0.307007	-9.1	0.417175	-9.2	0.288269	-9.2	0.503906	-9.1	0.402344
-9.1	0.671875	-8.9	0.570313	-9.1	0.413269	-8.9	0.296875	-9	0.410156	-9.1	0.273438	-9.1	0.503906	-9	0.402344
-9	0.660156	-8.8	0.558594	-9	0.414856	-8.8	0.284363	-8.9	0.397644	-9	0.266418	-9	0.4953	-8.9	0.397644
-8.9	0.655457	-8.7	0.558594	-8.9	0.421875	-8.7	0.269531	-8.8	0.381226	-8.9	0.264832	-8.9	0.5047	-8.8	0.390625
-8.8	0.653137	-8.6	0.550781	-8.8	0.413269	-8.6	0.264832	-8.7	0.378906	-8.8	0.25	-8.8	0.503906	-8.7	0.387512
-8.7	0.660156	-8.5	0.534363	-8.7	0.422668	-8.5	0.2453	-8.6	0.381226	-8.7	0.2547	-8.7	0.492188	-8.6	0.382813
-8.6	0.65155	-8.4	0.524231	-8.6	0.421875	-8.4	0.240601	-8.5	0.371094	-8.6	0.261719	-8.6	0.4953	-8.5	0.382813
-8.5	0.645325	-8.3	0.53125	-8.5	0.410156	-8.3	0.233582	-8.4	0.366394	-8.5	0.257019	-8.5	0.488281	-8.4	0.374207
-8.4	0.632019	-8.2	0.519531	-8.4	0.407043	-8.2	0.21875	-8.3	0.354675	-8.4	0.25	-8.4	0.485168	-8.3	0.367981
-8.3	0.636719	-8.1	0.519531	-8.3	0.402344	-8.1	0.206238	-8.2	0.346863	-8.3	0.2547	-8.3	0.480469	-8.2	0.354675
-8.2	0.628906	-8	0.510925	-8.2	0.402344	-8	0.186707	-8.1	0.332031	-8.2	0.261719	-8.2	0.477356	-8.1	0.34845
-8.1	0.617188	-7.9	0.515625	-8.1	0.393738	-7.9	0.174988	-8	0.330444	-8.1	0.253906	-8.1	0.472656	-8	0.346863
-8	0.597656	-7.8	0.507813	-8	0.390625	-7.8	0.170288	-7.9	0.315613	-8	0.2453	-8	0.475769	-7.9	0.339844
-7.9	0.582825	-7.7	0.496094	-7.9	0.395325	-7.7	0.167969	-7.8	0.296082	-7.9	0.25	-7.9	0.480469	-7.8	0.332031
-7.8	0.570313	-7.6	0.488281	-7.8	0.402344	-7.6	0.167175	-7.7	0.28125	-7.8	0.25	-7.8	0.485168	-7.7	0.320313
-7.7	0.550781	-7.5	0.476563	-7.7	0.390625	-7.5	0.147644	-7.6	0.27655	-7.7	0.246887	-7.7	0.492188	-7.6	0.320313
-7.6	0.539063	-7.4	0.476563	-7.6	0.382813	-7.4	0.139038	-7.5	0.271851	-7.6	0.242188	-7.6	0.487488	-7.5	0.3172
-7.5	0.524231	-7.3	0.46875	-7.5	0.382813	-7.3	0.132019	-7.4	0.269531	-7.5	0.235168	-7.5	0.480469	-7.4	0.3125
-7.4	0.522644	-7.2	0.457031	-7.4	0.374207	-7.2	0.128906	-7.3	0.257019	-7.4	0.242188	-7.4	0.485168	-7.3	0.305481
-7.3	0.5	-7.1	0.4375	-7.3	0.378906	-7.1	0.124207	-7.2	0.2453	-7.3	0.2453	-7.3	0.484375	-7.2	0.304688
-7.2	0.488281	-7	0.425781	-7.2	0.371094	-7	0.128906	-7.1	0.2453	-7.2	0.242188	-7.2	0.472656	-7.1	0.296082
-7.1	0.47345	-6.9	0.422668	-7.1	0.359375	-6.9	0.116394	-7	0.2453	-7.1	0.246887	-7.1	0.472656	-7	0.300781
-7	0.46405	-6.8	0.417969	-7	0.352356	-6.8	0.108582	-6.9	0.242188	-7	0.253906	-7	0.46405	-6.9	0.292969
-6.9	0.453918	-6.7	0.398438	-6.9	0.351563	-6.7	0.0882568	-6.8	0.240601	-6.9	0.25	-6.9	0.460938	-6.8	0.28595
-6.8	0.444519	-6.6	0.382019	-6.8	0.354675	-6.6	0.085144	-6.7	0.225769	-6.8	0.261719	-6.8	0.460938	-6.7	0.285156
-6.7	0.429688	-6.5	0.375	-6.7	0.347656	-6.5	0.0656128	-6.6	0.217957	-6.7	0.253906	-6.7	0.441406	-6.6	0.273438
-6.6	0.417969	-6.4	0.355469	-6.6	0.339844	-6.4	0.0585938	-6.5	0.210938	-6.6	0.242188	-6.6	0.441406	-6.5	0.264832
-6.5	0.417969	-6.3	0.352356	-6.5	0.332825	-6.3	0.0460815	-6.4	0.201538	-6.5	0.237488	-6.5	0.441406	-6.4	0.261719
-6.4	0.398438	-6.2	0.347656	-6.4	0.339844	-6.2	0.0413818	-6.3	0.194519	-6.4	0.230469	-6.4	0.434387	-6.3	0.2547
-6.3	0.390625	-6.1	0.328125	-6.3	0.339844	-6.1	0.0343628	-6.2	0.210938	-6.3	0.227356	-6.3	0.433594	-6.2	0.242188
-6.2	0.383606	-6	0.308594	-6.2	0.336731	-6	0.0390625	-6.1	0.206238	-6.2	0.222656	-6.2	0.424988	-6.1	0.234375
-6.1	0.371094	-5.9	0.299988	-6.1	0.335144	-5.9	0.0296631	-6	0.198425	-6.1	0.210938	-6.1	0.421875	-6	0.225769
-6	0.359375	-5.8	0.293762	-6	0.339844	-5.8	0.0273438	-5.9	0.191406	-6	0.210938	-6	0.398438	-5.9	0.227356
-5.9	0.346863	-5.7	0.280457	-5.9	0.325012	-5.7	0.0265503	-5.8	0.178894	-5.9	0.207825	-5.9	0.390625	-5.8	0.210938
-5.8	0.320313	-5.6	0.277344	-5.8	0.320313	-5.6	0.0179443	-5.7	0.170288	-5.8	0.203125	-5.8	0.378906	-5.7	0.210938
-5.7	0.325012	-5.5	0.257813	-5.7	0.3125	-5.5	0.0078125	-5.6	0.155457	-5.7	0.206238	-5.7	0.359375	-5.6	0.210938
-5.6	0.320313	-5.4	0.242981	-5.6	0.296082	-5.4	0.0117188	-5.5	0.160156	-5.6	0.210938	-5.6	0.344543	-5.5	0.196106
-5.5	0.300781	-5.3	0.21875	-5.5	0.300781	-5.3	-0.00469971	-5.4	0.147644	-5.5	0.207825	-5.5	0.332031	-5.4	0.198425
-5.4	0.300781	-5.2	0.210144	-5.4	0.289063	-5.2	-0.00939941	-5.3	0.131226	-5.4	0.206238	-5.4	0.3125	-5.3	0.191406
-5.3	0.289063	-5.1	0.207031	-5.3	0.269531	-5.1	-0.0164185	-5.2	0.140625	-5.3	0.203125	-5.3	0.292969	-5.2	0.171875
-5.2	0.284363	-5	0.195313	-5.2	0.261719	-5	-0.0359497	-5.1	0.135925	-5.2	0.196106	-5.2	0.28125	-5.1	0.171875
-5.1	0.293762	-4.9	0.200012	-5.1	0.25	-4.9	-0.0390625	-5	0.131226	-5.1	0.191406	-5.1	0.266418	-5	0.176575
-5	0.28125	-4.8	0.1828	-5	0.2547	-4.8	-0.0437622	-4.9	0.128906	-5	0.183594	-5	0.261719	-4.9	0.167175
-4.9	0.261719	-4.7	0.175781	-4.9	0.25	-4.7	-0.055481	-4.8	0.128113	-4.9	0.171875	-4.9	0.242188	-4.8	0.160156
-4.8	0.25	-4.6	0.168762	-4.8	0.242188	-4.6	-0.0601807	-4.7	0.132813	-4.8	0.164063	-4.8	0.237488	-4.7	0.140625
-4.7	0.238281	-4.5	0.167969	-4.7	0.230469	-4.5	-0.0750122	-4.6	0.131226	-4.7	0.155457	-4.7	0.222656	-4.6	0.137512
-4.6	0.230469	-4.4	0.16095	-4.6	0.210938	-4.4	-0.0703125	-4.5	0.135925	-4.6	0.160156	-4.6	0.207825	-4.5	0.132813
-4.5	0.210938	-4.3	0.15155	-4.5	0.203125	-4.3	-0.0750122	-4.4	0.128113	-4.5	0.152344	-4.5	0.195313	-4.4	0.121094
-4.4	0.191406	-4.2	0.15625	-4.4	0.194519	-4.2	-0.0945435	-4.3	0.121094	-4.4	0.145325	-4.4	0.186707	-4.3	0.113281
-4.3	0.1828	-4.1	0.136719	-4.3	0.1875	-4.1	-0.110962	-4.2	0.1203	-4.3	0.132813	-4.3	0.171875	-4.2	0.104675
-4.2	0.184387	-4	0.128906	-4.2	0.172668	-4	-0.117981	-4.1	0.108582	-4.2	0.124207	-4.2	0.160156	-4.1	0.106262
-4.1	0.179688	-3.9	0.121887	-4.1	0.171875	-3.9	-0.121094	-4	0.0999756	-4.1	0.121094	-4.1	0.152344	-4	0.101563
-4	0.164856	-3.8	0.112488	-4	0.174988	-3.8	-0.125793	-3.9	0.104675	-4	0.101563	-4	0.140625	-3.9	0.0820313
-3.9	0.160156	-3.7	0.102356	-3.9	0.172668	-3.7	-0.114075	-3.8	0.101563	-3.9	0.0945435	-3.9	0.137512	-3.8	0.0773315
-3.8	0.155457	-3.6	0.100769	-3.8	0.160156	-3.6	-0.121094	-3.7	0.108582	-3.8	0.101563	-3.8	0.113281	-3.7	0.0703125
-3.7	0.153137	-3.5	0.0906372	-3.7	0.157043	-3.5	-0.118774	-3.6	0.104675	-3.7	0.09375	-3.7	0.113281	-3.6	0.055481
-3.6	0.155457	-3.4	0.0945435	-3.6	0.143738	-3.4	-0.128906	-3.5	0.111694	-3.6	0.086731	-3.6	0.09375	-3.5	0.0476685
-3.5	0.153137	-3.3	0.0929565	-3.5	0.140625	-3.3	-0.145325	-3.4	0.109375	-3.5	0.0890503	-3.5	0.0968628	-3.4	0.0460815
-3.4	0.15155	-3.2	0.078125	-3.4	0.128906	-3.2	-0.150024	-3.3	0.113281	-3.4	0.086731	-3.4	0.0898438	-3.3	0.0476685
-3.3	0.153137	-3.1	0.071106	-3.3	0.140625	-3.1	-0.152344	-3.2	0.111694	-3.3	0.0820313	-3.3	0.086731	-3.2	0.0460815
-3.2	0.148438	-3	0.0734253	-3.2	0.125793	-3	-0.161743	-3.1	0.121094	-3.2	0.0773315	-3.2	0.085144	-3.1	0.0476685
-3.1	0.143738	-2.9	0.071106	-3.1	0.113281	-2.9	-0.160156	-3	0.108582	-3.1	0.0750122	-3.1	0.086731	-3	0.0343628
-3	0.133606	-2.8	0.078125	-3	0.0929565	-2.8	-0.157043	-2.9	0.111694	-3	0.0773315	-3	0.0898438	-2.9	0.0359497
-2.9	0.128906	-2.7	0.0734253	-2.9	0.0945435	-2.7	-0.137512	-2.8	0.0968628	-2.9	0.0750122	-2.9	0.0984497	-2.8	0.0281372
-2.8	0.114075	-2.6	0.0828247	-2.8	0.0929565	-2.6	-0.140625	-2.7	0.101563	-2.8	0.0773315	-2.8	0.0968628	-2.7	0.0265503
-2.7	0.112488	-2.5	0.0812378	-2.7	0.0828247	-2.5	-0.130493	-2.6	0.0968628	-2.7	0.0703125	-2.7	0.0898438	-2.6	0.0164185
-2.6	0.109375	-2.4	0.0789185	-2.6	0.086731	-2.4	-0.132813	-2.5	0.0921631	-2.6	0.0632935	-2.6	0.086731	-2.5	0.0148315
-2.5	0.0945435	-2.3	0.0859375	-2.5	0.085144	-2.3	-0.121094	-2.4	0.0773315	-2.5	0.055481	-2.5	0.085144	-2.4	0.0164185
-2.4	0.101563	-2.2	0.0976563	-2.4	0.0750122	-2.2	-0.106262	-2.3	0.0703125	-2.4	0.0578003	-2.4	0.0750122	-2.3	0.0148315
-2.3	0.0929565	-2.1	0.0859375	-2.3	0.0734253	-2.1	-0.0914307	-2.2	0.0578003	-2.3	0.055481	-2.3	0.085144	-2.2	0.0164185
-2.2	0.102356	-2	0.0859375	-2.2	0.0632935	-2	-0.0898438	-2.1	0.0491943	-2.2	0.0578003	-2.2	0.0750122	-2.1	0.0117188
-2.1	0.101563	-1.9	0.0828247	-2.1	0.0734253	-1.9	-0.086731	-2	0.0507813	-2.1	0.0507813	-2.1	0.0820313	-2	0.00701904
-2	0.0898438	-1.8	0.078125	-2	0.0632935	-1.8	-0.0797119	-1.9	0.0460815	-2	0.0476685	-2	0.0898438	-1.9	-0.00311279
-1.9	0.085144	-1.7	0.0734253	-1.9	0.0625	-1.7	-0.0773621	-1.8	0.0429688	-1.9	0.0460815	-1.9	0.086731	-1.8	0
-1.8	0.0828247	-1.6	0.071106	-1.8	0.046875	-1.6	-0.0718994	-1.7	0.0413818	-1.8	0.055481	-1.8	0.085144	-1.7	0
-1.7	0.0750122	-1.5	0.069519	-1.7	0.0507813	-1.5	-0.0703125	-1.6	0.038269	-1.7	0.0476685	-1.7	0.0820313	-1.6	0
-1.6	0.085144	-1.4	0.0664063	-1.6	0.046875	-1.4	-0.0601807	-1.5	0.03125	-1.6	0.0429688	-1.6	0.086731	-1.5	0
-1.5	0.0828247	-1.3	0.0515747	-1.5	0.0507813	-1.3	-0.0625	-1.4	0.0265503	-1.5	0.038269	-1.5	0.085144	-1.4	-0.00311279
-1.4	0.0734253	-1.2	0.0437622	-1.4	0.0437622	-1.2	-0.055481	-1.3	0.0218506	-1.4	0.0429688	-1.4	0.0945435	-1.3	-0.0078125
-1.3	0.0632935	-1.1	0.053894	-1.3	0.0343628	-1.1	-0.0437622	-1.2	0.0195313	-1.3	0.0390625	-1.3	0.0968628	-1.2	-0.00469971
-1.2	0.0507813	-1	0.0437622	-1.2	0.0359497	-1	-0.0359497	-1.1	0.0218506	-1.2	0.0359497	-1.2	0.0945435	-1.1	-0.00311279
-1.1	0.0390625	-0.899998	0.0421753	-1.1	0.0343628	-0.899998	-0.03125	-1	0.0195313	-1.1	0.0429688	-1.1	0.0820313	-1	0
-1	0.0421753	-0.799999	0.0320435	-1	0.024231	-0.799999	-0.0289307	-0.900002	0.0234375	-1	0.0265503	-1	0.078125	-0.900002	0.00860596
-0.899998	0.0437622	-0.699997	0.0421753	-0.899998	0.024231	-0.699997	-0.0195313	-0.799999	0.0187378	-0.899998	0.024231	-0.899998	0.0820313	-0.799999	0.00701904
-0.799999	0.03125	-0.599998	0.0351563	-0.799999	0.0265503	-0.599998	-0.0211182	-0.700001	0.0218506	-0.799999	0.0265503	-0.799999	0.0671997	-0.700001	-0.00311279
-0.700001	0.015625	-0.5	0.0203247	-0.700001	0.024231	-0.5	-0.0195313	-0.600002	0.0234375	-0.700001	0.024231	-0.700001	0.0773315	-0.600002	0
-0.599998	0.0195313	-0.399998	0.0125122	-0.599998	0.0148315	-0.399998	-0.0164185	-0.5	0.0148315	-0.599998	0.0164185	-0.599998	0.0671997	-0.5	0.0117188
-0.5	0.0078125	-0.299999	0.0109253	-0.5	0.0125122	-0.299999	-0.0195313	-0.400002	0.0218506	-0.5	0.0187378	-0.5	0.0625	-0.400002	0.0117188
-0.399998	0.0078125	-0.199997	0.0125122	-0.399998	0.0195313	-0.199997	-0.00939941	-0.299999	0.0195313	-0.399998	0.00469971	-0.399998	0.0429688	-0.299999	0.0117188
-0.299999	0.00469971	-0.0999985	0.0078125	-0.299999	0.0195313	-0.0999985	-0.00860596	-0.200001	0.0187378	-0.299999	0.00701904	-0.299999	0.0265503	-0.200001	0
-0.200001	0.00311279	0	0	-0.200001	0.0078125	0	2.27374E-13	-0.100002	0.0101318	-0.200001	-0.00311279	-0.200001	0.0164185	-0.100002	0.0117188
-0.0999985	0.00469971	0.100002	-0.00860596	-0.0999985	0	0.100002	-0.00469971	0	2.27374E-13	-0.0999985	0.00390625	-0.0999985	0.0148315	0	0
0	0	0.200001	-0.0234375	0	0	0.200001	-0.00469971	0.0999985	0.00701904	0	0	0	0	0.0999985	0.0164185
0.100002	-0.00390625	0.300003	-0.0265503	0.100002	0.00469971	0.300003	0.00701904	0.200001	-0.0078125	0.100002	0.00701904	0.100002	-0.00311279	0.200001	0.0148315
0.200001	0.00469971	0.400002	-0.0281372	0.200001	0	0.400002	-0.00469971	0.299999	-0.0125122	0.200001	0.00469971	0.200001	-0.0148315	0.299999	0.0164185
0.299999	0.00311279	0.5	-0.0304565	0.299999	-0.0164185	0.5	-0.0133057	0.399998	-0.0289307	0.299999	-0.00311279	0.299999	-0.0125122	0.399998	0.0195313
0.400002	-0.00701904	0.600002	-0.0281372	0.400002	-0.0148315	0.600002	-0.0117188	0.5	-0.0273438	0.400002	0.00701904	0.400002	-0.0195313	0.5	0.0117188
0.5	-0.0078125	0.700001	-0.0499878	0.5	-0.0164185	0.700001	-0.00469971	0.599998	-0.0172119	0.5	-0.00311279	0.5	-0.0343628	0.599998	0.0164185
0.600002	-0.0117188	0.800003	-0.0546875	0.600002	-0.0148315	0.800003	-0.0195313	0.700001	-0.0273438	0.600002	-0.0125122	0.600002	-0.0320435	0.700001	0.00701904
0.700001	-0.0195313	0.900002	-0.0625	0.700001	-0.0195313	0.900002	-0.0125122	0.799999	-0.0289307	0.700001	-0.022644	0.700001	-0.0460815	0.799999	0.0195313
0.799999	-0.0234375	1	-0.0773315	0.799999	-0.022644	1	-0.00939941	0.899998	-0.03125	0.799999	-0.0273438	0.799999	-0.0437622	0.899998	0.024231
0.900002	-0.0195313	1.1	-0.086731	0.900002	-0.024231	1.1	-0.024231	1	-0.0320435	0.900002	-0.0320435	0.900002	-0.0460815	1	0.0265503
1	-0.0265503	1.2	-0.101563	1	-0.0265503	1.2	-0.0359497	1.1	-0.0437622	1	-0.0460815	1	-0.0437622	1.1	0.024231
1.1	-0.0195313	1.3	-0.1203	1.1	-0.024231	1.3	-0.0390625	1.2	-0.0632935	1.1	-0.0390625	1.1	-0.0460815	1.2	0.0234375
1.2	-0.0359497	1.4	-0.1297	1.2	-0.0265503	1.4	-0.0289307	1.3	-0.0632935	1.2	-0.046875	1.2	-0.046875	1.3	0.0148315
1.3	-0.0343628	1.5	-0.144531	1.3	-0.0390625	1.5	-0.0476685	1.4	-0.0515747	1.3	-0.053894	1.3	-0.0585938	1.4	0.0164185
1.4	-0.0359497	1.6	-0.147644	1.4	-0.0437622	1.6	-0.0507813	1.5	-0.0664063	1.4	-0.0515747	1.4	-0.0734253	1.5	0.0117188
1.5	-0.0460815	1.7	-0.164063	1.5	-0.0578003	1.7	-0.055481	1.6	-0.071106	1.5	-0.053894	1.5	-0.0750122	1.6	0.0195313
1.6	-0.055481	1.8	-0.167175	1.6	-0.0507813	1.8	-0.0632935	1.7	-0.0679932	1.6	-0.0632935	1.6	-0.0820313	1.7	0.0164185
1.7	-0.0625	1.9	-0.176575	1.7	-0.0585938	1.9	-0.0718994	1.8	-0.0585938	1.7	-0.053894	1.7	-0.078125	1.8	0.0148315
1.8	-0.0578003	2	-0.186707	1.8	-0.0656128	2	-0.086731	1.9	-0.055481	1.8	-0.0585938	1.8	-0.085144	1.9	0.0164185
1.9	-0.0625	2.1	-0.191406	1.9	-0.0750122	2.1	-0.0898438	2	-0.0515747	1.9	-0.0750122	1.9	-0.0945435	2	0.0195313
2	-0.0578003	2.2	-0.188293	2	-0.0734253	2.2	-0.106262	2.1	-0.0484619	2	-0.0687561	2	-0.0929565	2.1	0.0234375
2.1	-0.055481	2.3	-0.198425	2.1	-0.086731	2.3	-0.109375	2.2	-0.0507813	2.1	-0.0632935	2.1	-0.0945435	2.2	0.0164185
2.2	-0.0578003	2.4	-0.198425	2.2	-0.0898438	2.4	-0.114075	2.3	-0.046875	2.2	-0.0664063	2.2	-0.104675	2.3	0.0187378
2.3	-0.055481	2.5	-0.207825	2.3	-0.104675	2.5	-0.133606	2.4	-0.0367432	2.3	-0.0734253	2.3	-0.109375	2.4	0.0164185
2.4	-0.0578003	2.6	-0.222656	2.4	-0.106262	2.6	-0.150024	2.5	-0.0390625	2.4	-0.0750122	2.4	-0.112488	2.5	0.0265503
2.5	-0.055481	2.7	-0.226563	2.5	-0.104675	2.7	-0.164856	2.6	-0.0320435	2.5	-0.0734253	2.5	-0.102356	2.6	0.0164185
2.6	-0.0578003	2.8	-0.217957	2.6	-0.109375	2.8	-0.179688	2.7	-0.0320435	2.6	-0.0859375	2.6	-0.112488	2.7	0.0265503
2.7	-0.0578003	2.9	-0.227356	2.7	-0.109375	2.9	-0.181274	2.8	-0.0289307	2.7	-0.0945435	2.7	-0.102356	2.8	0.0164185
2.8	-0.055481	3	-0.226563	2.8	-0.109375	3	-0.196106	2.9	-0.03125	2.8	-0.104675	2.8	-0.104675	2.9	0.0117188
2.9	-0.0656128	3.1	-0.217957	2.9	-0.124207	3.1	-0.199219	3	-0.0289307	2.9	-0.105469	2.9	-0.106262	3	-0.00469971
3	-0.0671997	3.2	-0.225769	3	-0.125793	3.2	-0.215637	3.1	-0.0195313	3	-0.114075	3	-0.104675	3.1	0.00469971
3.1	-0.0656128	3.3	-0.227356	3.1	-0.124207	3.3	-0.232056	3.2	-0.024231	3.1	-0.116394	3.1	-0.104675	3.2	-0.00311279
3.2	-0.055481	3.4	-0.242188	3.2	-0.136719	3.4	-0.235168	3.3	-0.0273438	3.2	-0.117188	3.2	-0.102356	3.3	-0.00469971
3.3	-0.0578003	3.5	-0.246094	3.3	-0.145325	3.5	-0.25	3.4	-0.0289307	3.3	-0.121094	3.3	-0.104675	3.4	-0.0078125
3.4	-0.0460815	3.6	-0.242188	3.4	-0.147644	3.6	-0.262512	3.5	-0.0359497	3.4	-0.124207	3.4	-0.102356	3.5	-0.0148315
3.5	-0.055481	3.7	-0.249207	3.5	-0.145325	3.7	-0.274231	3.6	-0.0273438	3.5	-0.125	3.5	-0.104675	3.6	-0.0125122
3.6	-0.0460815	3.8	-0.25	3.6	-0.155457	3.8	-0.290649	3.7	-0.0320435	3.6	-0.133606	3.6	-0.102356	3.7	-0.0195313
3.7	-0.0476685	3.9	-0.258606	3.7	-0.155457	3.9	-0.300781	3.8	-0.0320435	3.7	-0.124207	3.7	-0.104675	3.8	-0.0390625
3.8	-0.0460815	4	-0.268738	3.8	-0.148438	4	-0.305481	3.9	-0.0289307	3.8	-0.133606	3.8	-0.0945435	3.9	-0.0343628
3.9	-0.055481	4.1	-0.258606	3.9	-0.145325	4.1	-0.336731	4	-0.03125	3.9	-0.135925	3.9	-0.085144	4	-0.0351563
4	-0.0578003	4.2	-0.260925	4	-0.148438	4.2	-0.336731	4.1	-0.0320435	4	-0.148438	4	-0.0898438	4.1	-0.0437622
4.1	-0.0585938	4.3	-0.257019	4.1	-0.155457	4.3	-0.344543	4.2	-0.0406494	4.1	-0.15155	4.1	-0.0929565	4.2	-0.0460815
4.2	-0.0671997	4.4	-0.246887	4.2	-0.179688	4.4	-0.356262	4.3	-0.0390625	4.2	-0.141418	4.2	-0.0945435	4.3	-0.0437622
4.3	-0.0656128	4.5	-0.253906	4.3	-0.196106	4.5	-0.356262	4.4	-0.0320435	4.3	-0.148438	4.3	-0.104675	4.4	-0.0460815
4.4	-0.0773315	4.6	-0.253906	4.4	-0.199219	4.6	-0.367981	4.5	-0.0390625	4.4	-0.15155	4.4	-0.102356	4.5	-0.046875
4.5	-0.0750122	4.7	-0.249207	4.5	-0.203125	4.7	-0.367981	4.6	-0.0289307	4.5	-0.153137	4.5	-0.104675	4.6	-0.053894
4.6	-0.0656128	4.8	-0.239075	4.6	-0.194519	4.8	-0.390625	4.7	-0.024231	4.6	-0.160156	4.6	-0.117188	4.7	-0.0632935
4.7	-0.0671997	4.9	-0.249207	4.7	-0.194519	4.9	-0.380493	4.8	-0.0273438	4.7	-0.174988	4.7	-0.125793	4.8	-0.078125
4.8	-0.0820313	5	-0.237488	4.8	-0.179688	5	-0.397675	4.9	-0.0367432	4.8	-0.184387	4.8	-0.124207	4.9	-0.0976563
4.9	-0.0968628	5.1	-0.246887	4.9	-0.164856	5.1	-0.400024	5	-0.0507813	4.9	-0.194519	4.9	-0.136719	5	-0.112488
5	-0.106262	5.2	-0.237488	5	-0.167175	5.2	-0.402344	5.1	-0.055481	5	-0.203918	5	-0.148438	5.1	-0.121887
5.1	-0.0968628	5.3	-0.258606	5.1	-0.160156	5.3	-0.419556	5.2	-0.0632935	5.1	-0.21405	5.1	-0.155457	5.2	-0.135925
5.2	-0.101563	5.4	-0.288269	5.2	-0.167969	5.4	-0.441406	5.3	-0.0898438	5.2	-0.221863	5.2	-0.167969	5.3	-0.133606
5.3	-0.109375	5.5	-0.309387	5.3	-0.179688	5.5	-0.462524	5.4	-0.107056	5.3	-0.231262	5.3	-0.184387	5.4	-0.143738
5.4	-0.121094	5.6	-0.332031	5.4	-0.186707	5.6	-0.467987	5.5	-0.128906	5.4	-0.25	5.4	-0.194519	5.5	-0.15625
5.5	-0.140625	5.7	-0.358582	5.5	-0.203918	5.7	-0.470337	5.6	-0.150024	5.5	-0.272644	5.5	-0.21875	5.6	-0.171082
5.6	-0.147644	5.8	-0.3797	5.6	-0.225769	5.8	-0.485168	5.7	-0.167969	5.6	-0.274231	5.6	-0.22345	5.7	-0.184387
5.7	-0.164856	5.9	-0.397644	5.7	-0.235168	5.9	-0.496887	5.8	-0.1922	5.7	-0.272644	5.7	-0.238281	5.8	-0.194519
5.8	-0.179688	6	-0.433594	5.8	-0.27655	6	-0.5047	5.9	-0.208618	5.8	-0.285156	5.8	-0.2453	5.9	-0.1922
5.9	-0.206238	6.1	-0.464844	5.9	-0.293762	6.1	-0.519531	6	-0.230469	5.9	-0.305481	5.9	-0.257813	6	-0.207031
6	-0.215637	6.2	-0.479675	6	-0.315613	6.2	-0.528931	6.1	-0.242981	6	-0.308594	6	-0.28595	6.1	-0.225769
6.1	-0.242188	6.3	-0.496887	6.1	-0.339844	6.3	-0.539856	6.2	-0.266418	6.1	-0.323425	6.1	-0.303894	6.2	-0.235168
6.2	-0.249207	6.4	-0.53125	6.2	-0.374207	6.4	-0.542969	6.3	-0.282043	6.2	-0.332825	6.2	-0.316406	6.3	-0.2453
6.3	-0.264832	6.5	-0.5578	6.3	-0.383606	6.5	-0.550781	6.4	-0.296875	6.3	-0.342957	6.3	-0.342957	6.4	-0.242981
6.4	-0.269531	6.6	-0.589844	6.4	-0.398438	6.6	-0.555481	6.5	-0.317993	6.4	-0.347656	6.4	-0.352356	6.5	-0.257813
6.5	-0.28595	6.7	-0.617981	6.5	-0.421875	6.7	-0.552368	6.6	-0.344543	6.5	-0.359375	6.5	-0.374207	6.6	-0.27655
6.6	-0.296082	6.8	-0.639832	6.6	-0.424988	6.8	-0.570313	6.7	-0.367188	6.6	-0.359375	6.6	-0.398438	6.7	-0.284363
6.7	-0.308594	6.9	-0.660156	6.7	-0.4375	6.9	-0.571899	6.8	-0.391418	6.7	-0.378906	6.7	-0.422668	6.8	-0.296875
6.8	-0.336731	7	-0.700012	6.8	-0.460938	7	-0.582031	6.9	-0.419556	6.8	-0.410156	6.8	-0.4375	6.9	-0.332825
6.9	-0.359375	7.1	-0.734375	6.9	-0.46875	7.1	-0.591431	7	-0.449219	6.9	-0.4328	6.9	-0.457031	7	-0.354675
7	-0.385925	7.2	-0.760925	7	-0.485168	7.2	-0.613281	7.1	-0.47345	7	-0.449219	7	-0.483582	7.1	-0.364075
7.1	-0.410156	7.3	-0.788269	7.1	-0.52655	7.3	-0.640625	7.2	-0.517212	7.1	-0.46875	7.1	-0.5047	7.2	-0.398438
7.2	-0.438293	7.4	-0.809387	7.2	-0.53125	7.4	-0.661743	7.3	-0.539063	7.2	-0.485168	7.2	-0.519531	7.3	-0.429688
7.3	-0.467957	7.5	-0.84375	7.3	-0.546082	7.5	-0.671875	7.4	-0.571106	7.3	-0.4953	7.3	-0.546082	7.4	-0.46875
7.4	-0.5	7.6	-0.858582	7.4	-0.575012	7.6	-0.684387	7.5	-0.599243	7.4	-0.510925	7.4	-0.566406	7.5	-0.4953
7.5	-0.53595	7.7	-0.8797	7.5	-0.604675	7.7	-0.700806	7.6	-0.621094	7.5	-0.535156	7.5	-0.594543	7.6	-0.507813
7.6	-0.570313	7.8	-0.889832	7.6	-0.625793	7.8	-0.727356	7.7	-0.633606	7.6	-0.543762	7.6	-0.628906	7.7	-0.527344
7.7	-0.601563	7.9	-0.902344	7.7	-0.647644	7.9	-0.730469	7.8	-0.648438	7.7	-0.553894	7.7	-0.643738	7.8	-0.543762
7.8	-0.628113	8	-0.907043	7.8	-0.660156	8	-0.735168	7.9	-0.66095	7.8	-0.566406	7.8	-0.648438	7.9	-0.546082
7.9	-0.640625	8.1	-0.917175	7.9	-0.660156	8.1	-0.742981	8	-0.669556	7.9	-0.582825	7.9	-0.663269	8	-0.543762
8	-0.671875	8.2	-0.941406	8	-0.648438	8.2	-0.751587	8.1	-0.672668	8	-0.589844	8	-0.667969	8.1	-0.546082
8.1	-0.686707	8.3	-0.945313	8.1	-0.663269	8.3	-0.742188	8.2	-0.679688	8.1	-0.597656	8.1	-0.672668	8.2	-0.558594
8.2	-0.696106	8.4	-0.928894	8.2	-0.664856	8.4	-0.742981	8.3	-0.689087	8.2	-0.592957	8.2	-0.679688	8.3	-0.558594
8.3	-0.722656	8.5	-0.938293	8.3	-0.655457	8.5	-0.75	8.4	-0.684387	8.3	-0.597656	8.3	-0.6828	8.4	-0.578125
8.4	-0.725769	8.6	-0.928894	8.4	-0.679688	8.6	-0.739868	8.5	-0.6875	8.4	-0.602356	8.4	-0.684387	8.5	-0.582031
8.5	-0.735168	8.7	-0.941406	8.5	-0.684387	8.7	-0.72345	8.6	-0.689087	8.5	-0.604675	8.5	-0.6828	8.6	-0.578125
8.6	-0.742188	8.8	-0.938293	8.6	-0.683594	8.8	-0.71875	8.7	-0.679688	8.6	-0.597656	8.6	-0.684387	8.7	-0.585144
8.7	-0.757019	8.9	-0.917175	8.7	-0.686707	8.9	-0.720337	8.8	-0.6875	8.7	-0.597656	8.7	-0.686707	8.8	-0.578125
8.8	-0.757813	9	-0.918762	8.8	-0.694519	9	-0.727356	8.9	-0.677368	8.8	-0.585938	8.8	-0.684387	8.9	-0.575012
8.9	-0.78125	9.1	-0.909363	8.9	-0.696106	9.1	-0.742188	9	-0.667969	8.9	-0.578125	8.9	-0.694519	9	-0.570313
9	-0.78595	9.2	-0.914063	9	-0.694519	9.2	-0.742981	9.1	-0.672668	9	-0.573425	9	-0.6875	9.1	-0.585144
9.1	-0.77655	9.3	-0.914063	9.1	-0.699219	9.3	-0.762512	9.2	-0.669556	9.1	-0.582825	9.1	-0.6828	9.2	-0.578125
9.2	-0.778137	9.4	-0.909363	9.2	-0.6875	9.4	-0.782043	9.3	-0.660156	9.2	-0.592957	9.2	-0.675781	9.3	-0.592957
9.3	-0.800781	9.5	-0.921875	9.3	-0.684387	9.5	-0.793762	9.4	-0.664856	9.3	-0.594543	9.3	-0.684387	9.4	-0.605469
9.4	-0.827332	9.6	-0.914063	9.4	-0.674988	9.6	-0.813293	9.5	-0.653137	9.4	-0.604675	9.4	-0.6875	9.5	-0.621887
9.5	-0.820313	9.7	-0.8797	9.5	-0.645325	9.7	-0.790649	9.6	-0.648438	9.5	-0.617188	9.5	-0.694519	9.6	-0.612488
9.6	-0.796082	9.8	-0.858582	9.6	-0.609375	9.8	-0.761719	9.7	-0.618774	9.6	-0.594543	9.6	-0.6875	9.7	-0.594543
9.7	-0.746887	9.9	-0.83905	9.7	-0.585144	9.9	-0.7547	9.8	-0.594543	9.7	-0.565613	9.7	-0.684387	9.8	-0.565613
9.8	-0.722656	10	-0.8172	9.8	-0.565613	10	-0.735168	9.9	-0.578125	9.8	-0.546875	9.8	-0.655457	9.9	-0.535156
9.9	-0.679688	10.1	-0.77655	9.9	-0.555481	10.1	-0.72345	10	-0.548462	9.9	-0.519531	9.9	-0.617188	10	-0.524231
10	-0.679688	10.2	-0.766418	10	-0.523438	10.2	-0.715637	10.1	-0.539063	10	-0.511719	10	-0.614075	10.1	-0.519531
10.1	-0.652344	10.3	-0.746094	10.1	-0.487488	10.3	-0.712524	10.2	-0.517212	10.1	-0.483582	10.1	-0.585144	10.2	-0.522644
10.2	-0.647644	10.4	-0.729675	10.2	-0.465637	10.4	-0.696106	10.3	-0.496887	10.2	-0.476563	10.2	-0.578125	10.3	-0.496094
10.3	-0.625793	10.5	-0.706238	10.3	-0.436707	10.5	-0.676575	10.4	-0.488281	10.3	-0.464844	10.3	-0.553894	10.4	-0.507813
10.4	-0.628113	10.6	-0.707825	10.4	-0.421875	10.6	-0.667969	10.5	-0.476563	10.4	-0.453918	10.4	-0.524231	10.5	-0.485168
10.5	-0.601563	10.7	-0.671082	10.5	-0.390625	10.7	-0.642212	10.6	-0.466431	10.5	-0.483582	10.5	-0.519531	10.6	-0.5
10.6	-0.59845	10.8	-0.649231	10.6	-0.398438	10.8	-0.606262	10.7	-0.446106	10.6	-0.476563	10.6	-0.546875	10.7	-0.488281
10.7	-0.601563	10.9	-0.636719	10.7	-0.410156	10.9	-0.606262	10.8	-0.446106	10.7	-0.476563	10.7	-0.522644	10.8	-0.483582
10.8	-0.613281	11	-0.608582	10.8	-0.424988	11	-0.613281	10.9	-0.417969	10.8	-0.488281	10.8	-0.512512	10.9	-0.491394
10.9	-0.628113	11.1	-0.597656	10.9	-0.421875	11.1	-0.575012	11	-0.410156	10.9	-0.483582	10.9	-0.514832	11	-0.485168
11	-0.621094	11.2	-0.569519	11	-0.407043	11.2	-0.543762	11.1	-0.353149	11	-0.47345	11	-0.5047	11.1	-0.46405
11.1	-0.640625	11.3	-0.535156	11.1	-0.409363	11.3	-0.519531	11.2	-0.332031	11.1	-0.46405	11.1	-0.503113	11.2	-0.434387
11.2	-0.628113	11.4	-0.53125	11.2	-0.402344	11.4	-0.645325	11.3	-0.289063	11.2	-0.472656	11.2	-0.5	11.3	-0.424988
11.3	-0.657043	11.5	-0.523438	11.3	-0.441406	11.5	-0.762512	11.4	-0.298462	11.3	-0.417175	11.3	-0.519531	11.4	-0.390625
11.4	-0.717957	11.6	-0.546082	11.4	-0.378906	11.6	-0.919556	11.5	-0.175781	11.4	-0.371094	11.4	-0.472656	11.5	-0.393738
11.5	-0.757019	11.7	-0.579712	11.5	-0.308594	11.7	-1.02423	11.6	-0.196899	11.5	-0.277344	11.5	-0.514832	11.6	-0.332825
11.6	-0.907043	11.8	-0.839844	11.6	-0.59375	11.8	-1.40234	11.7	-0.59845	11.6	-0.515625	11.6	-0.485168	11.7	-0.549988
11.7	-0.890625	11.9	-1.60468	11.7	-0.507813	11.9	-2.02502	11.8	-1.09064	11.7	-0.785156	11.7	-0.757813	11.8	-1.20468
11.8	-1.37109	12	-3.12109	11.8	-1.25781	12	-2.68439	11.9	-1.77814	11.8	-1.17267	11.8	-0.988281	11.9	-1.86249
11.9	-2.70703	12.1	-5.31799	11.9	-2.29376	12.1	-3.05627	12	-2.04922	11.9	-2.10547	11.9	-1.55859	12	-1.95703
12	-6.14844	12.2	-7.85077	12	-3.36249	12.2	-1.45313	12.1	-1.30469	12	-2.19531	12	-2.10547	12.1	-0.649231
12.1	-13.207	12.3	-9.49689	12.1	-3.40625	12.3	1.83905	12.2	2.25546	12.1	-0.894531	12.1	-1.41797	12.2	2.83594
12.2	-22.5898	12.4	-8.56482	12.2	-1.70392	12.4	7.38904	12.3	7.8078	12.2	2.92889	12.2	2.00781	12.3	7.82343
12.3	-31.0859	12.5	-4.25159	12.3	1.9375	12.5	13.9953	12.4	15.1437	12.3	8.66016	12.3	7.71564	12.4	14.1688
12.4	-35.3492	12.6	3.52966	12.4	7.58826	12.6	21.4813	12.5	23.2961	12.4	16.1016	12.4	14.6867	12.5	21.0281
12.5	-32.7492	12.7	15.4086	12.5	15.4117	12.7	29.9398	12.6	31.8906	12.5	23.9406	12.5	22.7	12.6	27.6211
12.6	-22.6758	12.8	30.8461	12.6	25.2547	12.8	39.8641	12.7	41	12.6	32.3836	12.6	30.7383	12.7	34.4813
12.7	-4.8797	12.9	50.1453	12.7	36.9899	12.9	50.968	12.8	50.7313	12.7	40.8906	12.7	39.1414	12.8	42.1227
12.8	20.3789	13	72.9797	12.8	50.7586	13	62.9562	12.9	61.5414	12.8	49.8508	12.8	47.7906	12.9	50.3851
12.9	52.332	13.1	100.868	12.9	66.3008	13.1	73.0672	13	71.9453	12.9	59.532	12.9	57.282	13	56.7258
13	93.7695	13.2	133.902	13	82.6195	13.2	76.8148	13.1	76.3531	13	68.3477	13	66.35	13.1	55.5414
13.1	154.046	13.3	168.238	13.1	97.0945	13.3	74.9844	13.2	70.9273	13.1	70.5164	13.1	68.5226	13.2	45.3836
13.2	234.779	13.4	197.896	13.2	107.863	13.4	71.4422	13.3	59.4844	13.2	61.6633	13.2	59.5226	13.3	31.1781
13.3	316.327	13.5	220.813	13.3	115.311	13.5	68.4695	13.4	48.5148	13.3	47.6172	13.3	43.6281	13.4	19.343
13.4	385.348	13.6	237.377	13.4	120.646	13.6	66.1219	13.5	40.5633	13.4	34.6859	13.4	29.1445	13.5	10.7836
13.5	437.279	13.7	248.282	13.5	124.397	13.7	64.2015	13.6	34.9023	13.5	25.2563	13.5	18.0609	13.6	5.02499
13.6	473.612	13.8	255.027	13.6	126.805	13.8	62.3273	13.7	30.8758	13.6	18.918	13.6	10.5109	13.7	1.13983
13.7	497.469	13.9	258.173	13.7	127.602	13.9	60.4234	13.8	27.9078	13.7	14.5555	13.7	5.71954	13.8	-1.8078
13.8	511.554	14	259.042	13.8	127.082	14	58.4429	13.9	25.1695	13.8	11.2031	13.8	2.23828	13.9	-3.57187
13.9	519.189	14.1	258.135	13.9	125.703	14.1	56.5062	14	23.2023	13.9	8.61172	13.9	-0.541412	14	-4.78436
14	521.918	14.2	256.279	14	123.628	14.2	54.2828	14.1	21.175	14	6.76483	14	-2.31406	14.1	-5.84686
14.1	521.209	14.3	253.555	14.1	121.155	14.3	52.1469	14.2	19.525	14.1	5.35156	14.1	-3.80548	14.2	-6.6297
14.2	518.87	14.4	250.511	14.2	118.298	14.4	50.2805	14.3	18.1062	14.2	4.06171	14.2	-4.89297	14.3	-7.13672
14.3	515.023	14.5	247.173	14.3	115.427	14.5	48.0344	14.4	16.5391	14.3	2.89453	14.3	-5.69531	14.4	-7.60468
14.4	510.791	14.6	243.805	14.4	112.358	14.6	45.7375	14.5	15.0867	14.4	1.78046	14.4	-6.40155	14.5	-8.04297
14.5	506.421	14.7	240.79	14.5	109.489	14.7	43.7554	14.6	13.7711	14.5	1.21249	14.5	-7.14688	14.6	-8.12579
14.6	502.425	14.8	237.961	14.6	106.67	14.8	41.9984	14.7	12.7679	14.6	0.453918	14.6	-7.34375	14.7	-8.1586
14.7	499.107	14.9	235.13	14.7	103.906	14.9	40.2219	14.8	11.6	14.7	-0.260162	14.7	-7.86874	14.8	-8.32892
14.8	496.505	15	232.631	14.8	101.147	15	38.2601	14.9	10.4789	14.8	-0.789856	14.8	-7.99454	14.9	-8.31171
14.9	494.777	15.1	230.584	14.9	98.6008	15.1	36.5352	15	9.56171	14.9	-1.41797	14.9	-7.99063	15	-8.22186
15	494.277	15.2	228.914	15	96.1305	15.2	34.8976	15.1	8.73669	15	-1.82111	15	-8.16406	15.1	-7.97577
15.1	494.356	15.3	227.56	15.1	93.7758	15.3	33.2789	15.2	7.94843	15.1	-1.80859	15.1	-8.14609	15.2	-7.77499
15.2	495.95	15.4	226.63	15.2	91.4266	15.4	31.743	15.3	7.18436	15.2	-2.09845	15.2	-8.08124	15.3	-7.80157
15.3	498.673	15.5	225.891	15.3	89.3453	15.5	30.3203	15.4	6.41248	15.3	-2.58438	15.3	-8.13983	15.4	-7.77344
15.4	502.854	15.6	225.334	15.4	87.4078	15.6	28.8961	15.5	5.77344	15.4	-2.95157	15.4	-8.02814	15.5	-7.69611
15.5	507.709	15.7	225.393	15.5	85.4039	15.7	27.5399	15.6	4.98828	15.5	-3.3172	15.5	-8.07343	15.6	-7.56485
15.6	513.767	15.8	225.891	15.6	83.5648	15.8	26.0352	15.7	4.13046	15.6	-3.58829	15.6	-7.96249	15.7	-7.29141
15.7	520.827	15.9	226.517	15.7	81.7555	15.9	24.7	15.8	3.38123	15.7	-3.74921	15.7	-8.02579	15.8	-6.95392
15.8	528.834	16	227.559	15.8	80	16	23.2883	15.9	2.63123	15.8	-3.95157	15.8	-8.04297	15.9	-6.76328
15.9	537.798	16.1	229.056	15.9	78.3024	16.1	21.8336	16	1.94141	15.9	-4.1297	15.9	-7.84454	16	-6.82578
16	548.042	16.2	230.838	16	76.6633	16.2	20.3914	16.1	1.22733	16	-4.47421	16	-7.69452	16.1	-6.71484
16.1	558.895	16.3	232.959	16.1	75.1758	16.3	19.0187	16.2	0.484375	16.1	-4.82813	16.1	-7.6586	16.2	-6.59375
16.2	570.749	16.4	235.49	16.2	73.7195	16.4	17.5969	16.3	-0.182831	16.2	-5.14999	16.2	-7.67422	16.3	-6.41876
16.3	583.02	16.5	238.507	16.3	72.4172	16.5	16.3086	16.4	-0.911743	16.3	-5.48438	16.3	-7.69452	16.4	-6.37109
16.4	596.17	16.6	241.63	16.4	71.2047	16.6	14.9953	16.5	-1.7258	16.4	-5.84375	16.4	-7.75156	16.5	-6.29532
16.5	610.271	16.7	245.028	16.5	70	16.7	13.7031	16.6	-2.46643	16.5	-6.09531	16.5	-7.69141	16.6	-6.23282
16.6	624.798	16.8	248.74	16.6	68.9149	16.8	12.45	16.7	-3.20862	16.6	-6.45624	16.6	-7.68985	16.7	-6.22266
16.7	639.912	16.9	252.817	16.7	67.8945	16.9	11.1953	16.8	-3.95471	16.7	-6.86874	16.7	-7.76093	16.8	-6.16327
16.8	655.841	17	257.313	16.8	66.9469	17	9.87262	16.9	-4.59454	16.8	-7.24844	16.8	-7.86017	16.9	-6.12735
16.9	672.391	17.1	262.327	16.9	66.0172	17.1	8.58673	17	-5.29297	16.9	-7.66718	16.9	-7.92188	17	-6.15546
17	689.639	17.2	267.617	17	65.0922	17.2	7.27032	17.1	-5.98361	17	-8.06406	17	-8.01483	17.1	-6.11484
17.1	706.831	17.3	273.162	17.1	64.257	17.3	5.94373	17.2	-6.71094	17.1	-8.39532	17.1	-8.13361	17.2	-6.08905
17.2	724.532	17.4	278.89	17.2	63.5164	17.4	4.66327	17.3	-7.46564	17.2	-8.73517	17.2	-8.21796	17.3	-6.11484
17.3	742.781	17.5	285.014	17.3	62.9227	17.5	3.39999	17.4	-8.23752	17.3	-9.11093	17.3	-8.31641	17.4	-6.09921
17.4	761.176	17.6	291.458	17.4	62.3133	17.6	2.14685	17.5	-9.01877	17.4	-9.45547	17.4	-8.38202	17.5	-6.11563
17.5	779.849	17.7	298.158	17.5	61.8531	17.7	0.921875	17.6	-9.85626	17.5	-9.97266	17.5	-8.50626	17.6	-6.17343
17.6	798.866	17.8	305.161	17.6	61.5297	17.8	-0.314087	17.7	-10.7766	17.6	-10.4312	17.6	-8.60858	17.7	-6.17813
17.7	818.131	17.9	312.455	17.7	61.3008	17.9	-1.56799	17.8	-11.632	17.7	-10.9039	17.7	-8.79688	17.8	-6.20468
17.8	837.912	18	320.205	17.8	61.1125	18	-2.80627	17.9	-12.4485	17.8	-11.3758	17.8	-9.00626	17.9	-6.26328
17.9	857.445	18.1	328.231	17.9	60.9211	18.1	-4.06329	18	-13.257	17.9	-11.8883	17.9	-9.22656	18	-6.28281
18	877.02	18.2	336.439	18	60.7234	18.2	-5.28516	18.1	-14.1	18	-12.1609	18	-9.45938	18.1	-6.33359
18.1	896.969	18.3	344.798	18.1	60.6828	18.3	-6.49689	18.2	-14.932	18.1	-12.3563	18.1	-9.64374	18.2	-6.4086
18.2	916.988	18.4	353.576	18.2	60.8109	18.4	-7.70313	18.3	-15.725	18.2	-12.8992	18.2	-9.83514	18.3	-6.47736
18.3	937.188	18.5	362.671	18.3	61.0258	18.5	-8.89453	18.4	-16.4828	18.3	-13.3781	18.3	-10.0734	18.4	-6.54453
18.4	957.17	18.6	371.744	18.4	61.3594	18.6	-10.0672	18.5	-17.3148	18.4	-13.8711	18.4	-10.3141	18.5	-6.61954
18.5	977.192	18.7	381.233	18.5	61.7109	18.7	-11.182	18.6	-18.1156	18.5	-14.3563	18.5	-10.5383	18.6	-6.77109
18.6	997.364	18.8	390.923	18.6	62.1219	18.8	-12.3125	18.7	-18.9828	18.6	-14.832	18.6	-10.7328	18.7	-6.93048
18.7	1017.32	18.9	400.77	18.7	62.6696	18.9	-13.4336	18.8	-19.8578	18.7	-15.3172	18.7	-10.9445	18.8	-7.06876
18.8	1037.11	19	410.903	18.8	63.1883	19	-14.5219	18.9	-20.7281	18.8	-15.7922	18.8	-11.1938	18.9	-7.20001
18.9	1056.96	19.1	421.262	18.9	63.9094	19.1	-15.6047	19	-21.5563	18.9	-16.2805	18.9	-11.4164	19	-7.3461
19	1076.79	19.2	431.808	19	65.1266	19.2	-16.6625	19.1	-22.3969	19	-16.7977	19	-11.6305	19.1	-7.52499
19.1	1096.41	19.3	442.564	19.1	66.4031	19.3	-17.7133	19.2	-23.2438	19.1	-17.3508	19.1	-11.8781	19.2	-7.66171
19.2	1116.05	19.4	453.574	19.2	67.6375	19.4	-18.768	19.3	-24.093	19.2	-17.9305	19.2	-12.143	19.3	-7.7547
19.3	1135.23	19.5	464.697	19.3	68.9289	19.5	-19.8148	19.4	-24.9617	19.3	-18.4492	19.3	-12.4289	19.4	-7.88828
19.4	1154.58	19.6	475.988	19.4	70.307	19.6	-20.8547	19.5	-25.8305	19.4	-18.9672	19.4	-12.6812	19.5	-8
19.5	1173.6	19.7	487.602	19.5	71.6203	19.7	-21.9203	19.6	-26.6656	19.5	-19.4734	19.5	-12.9211	19.6	-8.11172
19.6	1192.18	19.8	499.241	19.6	73.0101	19.8	-22.9672	19.7	-27.5063	19.6	-20.0031	19.6	-13.2125	19.7	-8.24609
19.7	1211.13	19.9	511.218	19.7	74.5602	19.9	-23.9547	19.8	-28.4117	19.7	-20.5273	19.7	-13.4992	19.8	-8.35703
19.8	1229.37	20	523.324	19.8	76.4047	20	-24.9242	19.9	-29.2516	19.8	-21.0414	19.8	-13.7664	19.9	-8.50235
19.9	1247.59	20.1	535.441	19.9	78.3625	20.1	-25.9047	20	-30.1258	19.9	-21.5438	19.9	-14.0383	20	-8.64844
20	1265.51	20.2	547.645	20	80.3265	20.2	-26.8375	20.1	-30.9703	20	-22.0219	20	-14.3383	20.1	-8.78671
20.1	1282.97	20.3	560.136	20.1	82.2648	20.3	-27.7711	20.2	-31.8024	20.1	-22.5234	20.1	-14.6156	20.2	-8.91562
20.2	1300.21	20.4	572.997	20.2	84.3195	20.4	-28.6492	20.3	-32.6258	20.2	-23.0219	20.2	-14.8961	20.3	-9.06329
20.3	1317.09	20.5	585.243	20.3	86.5422	20.5	-29.4969	20.4	-33.475	20.3	-23.5547	20.3	-15.1586	20.4	-9.2164
20.4	1333.66	20.6	598.215	20.4	88.9844	20.6	-30.3453	20.5	-34.3133	20.4	-24.0609	20.4	-15.4203	20.5	-9.37189
20.5	1350.37	20.7	611.397	20.5	91.4188	20.7	-31.1836	20.6	-35.1297	20.5	-24.5625	20.5	-15.6883	20.6	-9.54843
20.6	1366.38	20.8	624.446	20.6	93.9149	20.8	-32.0055	20.7	-35.9383	20.6	-25.0648	20.6	-15.9672	20.7	-9.68906
20.7	1381.94	20.9	637.382	20.7	96.5516	20.9	-32.8328	20.8	-36.7633	20.7	-25.5851	20.7	-16.2242	20.8	-9.82501
20.8	1397.71	21	650.564	20.8	99.3883	21	-33.625	20.9	-37.568	20.8	-26.1211	20.8	-16.5031	20.9	-9.97812
20.9	1412.79	21.1	663.934	20.9	102.273	21.1	-34.4344	21	-38.3328	20.9	-26.6352	20.9	-16.8109	21	-10.1383
21	1427.76	21.2	677.374	21	105.276	21.2	-35.1883	21.1	-39.1258	21	-27.1398	21	-17.0484	21.1	-10.3102
21.1	1442.33	21.3	690.855	21.1	108.341	21.3	-35.9102	21.2	-39.918	21.1	-27.6711	21.1	-17.3062	21.2	-10.4656
21.2	1456.36	21.4	704.607	21.2	111.523	21.4	-36.6086	21.3	-40.7188	21.2	-28.1664	21.2	-17.5836	21.3	-10.6258
21.3	1470.13	21.5	718.149	21.3	114.762	21.5	-37.3086	21.4	-41.4586	21.3	-28.6719	21.3	-17.8891	21.4	-10.7672
21.4	1483.71	21.6	731.803	21.4	118.138	21.6	-38.011	21.5	-42.2039	21.4	-29.2023	21.4	-18.1703	21.5	-10.9266
21.5	1497.01	21.7	745.381	21.5	121.765	21.7	-38.6867	21.6	-43.4922	21.5	-29.7133	21.5	-18.4547	21.6	-11.075
21.6	1510.04	21.8	759.337	21.6	125.374	21.8	-39.3008	21.7	-43.9883	21.6	-30.2414	21.6	-18.7484	21.7	-11.2281
21.7	1522.36	21.9	773.111	21.7	129.017	21.9	-39.9297	21.8	-44.7516	21.7	-30.7609	21.7	-19.0562	21.8	-11.4227
21.8	1534.6	22	786.915	21.8	132.778	22	-40.5383	21.9	-45.4609	21.8	-31.2602	21.8	-19.3617	21.9	-11.6109
21.9	1546.51	22.1	800.955	21.9	136.58	22.1	-41.1313	22	-46.2617	21.9	-31.7563	21.9	-19.6531	22	-11.7984
22	1558.27	22.2	814.83	22	140.538	22.2	-41.6586	22.1	-47.0586	22	-32.2609	22	-19.9203	22.1	-11.9688
22.1	1569.66	22.3	828.869	22.1	144.63	22.3	-42.2024	22.2	-47.8758	22.1	-32.768	22.1	-20.2391	22.2	-12.1305
22.2	1580.5	22.4	843.013	22.2	148.841	22.4	-42.7133	22.3	-48.6523	22.2	-33.2563	22.2	-20.5422	22.3	-12.2938
22.3	1591.29	22.5	856.905	22.3	153.162	22.5	-43.1742	22.4	-49.4149	22.3	-33.7609	22.3	-20.857	22.4	-12.4508
22.4	1601.91	22.6	870.925	22.4	157.463	22.6	-43.65	22.5	-50.2148	22.4	-34.2758	22.4	-21.1508	22.5	-12.6141
22.5	1612.15	22.7	885.23	22.5	161.792	22.7	-44.0836	22.6	-50.9695	22.5	-34.7726	22.5	-21.4586	22.6	-12.7672
22.6	1622.02	22.8	899.301	22.6	166.292	22.8	-44.5063	22.7	-51.757	22.6	-35.2484	22.6	-21.775	22.7	-12.9422
22.7	1631.55	22.9	913.395	22.7	170.92	22.9	-44.9266	22.8	-52.5359	22.7	-35.6781	22.7	-22.0828	22.8	-13.0836
22.8	1640.84	23	927.785	22.8	175.673	23	-45.3148	22.9	-53.3016	22.8	-36.1	22.8	-22.3976	22.9	-13.2274
22.9	1650.07	23.1	941.812	22.9	180.558	23.1	-45.6609	23	-54.0586	22.9	-36.8508	22.9	-22.6805	23	-13.368
23	1658.99	23.2	955.926	23	185.477	23.2	-45.9766	23.1	-54.8117	23	-37.4906	23	-22.9937	23.1	-13.5164
23.1	1667.63	23.3	970.134	23.1	190.485	23.3	-46.2321	23.2	-55.5547	23.1	-37.9641	23.1	-23.3258	23.2	-13.6523
23.2	1675.85	23.4	984.38	23.2	195.532	23.4	-46.5234	23.3	-56.3235	23.2	-38.4672	23.2	-23.6359	23.3	-13.807
23.3	1683.97	23.5	998.432	23.3	200.598	23.5	-46.7977	23.4	-57.0742	23.3	-38.9711	23.3	-23.9586	23.4	-13.9727
23.4	1691.99	23.6	1012.7	23.4	205.788	23.6	-47.032	23.5	-57.8328	23.4	-39.4562	23.4	-24.2625	23.5	-14.15
23.5	1699.8	23.7	1026.69	23.5	211.171	23.7	-47.2266	23.6	-58.5813	23.5	-39.9273	23.5	-24.5648	23.6	-14.3242
23.6	1707.12	23.8	1040.83	23.6	216.566	23.8	-47.4695	23.7	-59.3406	23.6	-40.4008	23.6	-24.8766	23.7	-14.4898
23.7	1714.31	23.9	1054.65	23.7	221.973	23.9	-47.6641	23.8	-60.0617	23.7	-40.9008	23.7	-25.1805	23.8	-14.6844
23.8	1721.56	24	1068.57	23.8	227.514	24	-47.8172	23.9	-60.7852	23.8	-41.4016	23.8	-25.4953	23.9	-14.8727
23.9	1728.3	24.1	1082.49	23.9	233.206	24.1	-47.9711	24	-61.5	23.9	-41.9203	23.9	-25.7984	24	-15.0477
24	1735.12	24.2	1096.45	24	238.893	24.2	-48.0344	24.1	-62.2266	24	-42.3883	24	-26.1187	24.1	-15.1961
24.1	1741.62	24.3	1110.43	24.1	244.641	24.3	-48.0656	24.2	-62.9414	24.1	-42.8695	24.1	-26.4149	24.2	-15.3727
24.2	1747.96	24.4	1124.07	24.2	250.438	24.4	-48.0883	24.3	-63.636	24.2	-43.3617	24.2	-26.6891	24.3	-15.5359
24.3	1753.97	24.5	1137.81	24.3	256.306	24.5	-48.0375	24.4	-64.3274	24.3	-43.8492	24.3	-27.0336	24.4	-15.7031
24.4	1759.93	24.6	1151.51	24.4	262.279	24.6	-48.025	24.5	-65.0313	24.4	-44.3273	24.4	-27.3328	24.5	-15.8492
24.5	1765.79	24.7	1165.32	24.5	268.296	24.7	-47.9594	24.6	-65.7258	24.5	-44.8344	24.5	-27.6187	24.6	-16.0359
24.6	1771.63	24.8	1178.71	24.6	274.303	24.8	-47.8539	24.7	-66.425	24.6	-45.3258	24.6	-27.9156	24.7	-16.2039
24.7	1777.2	24.9	1192.13	24.7	280.455	24.9	-47.7078	24.8	-67.125	24.7	-45.8422	24.7	-28.2281	24.8	-16.368
24.8	1782.55	25	1205.35	24.8	286.774	25	-47.5852	24.9	-67.8031	24.8	-46.3273	24.8	-28.5211	24.9	-16.5016
24.9	1787.6	25.1	1218.67	24.9	293.096	25.1	-47.4344	25	-68.5188	24.9	-46.8219	24.9	-28.8266	25	-16.6649
25	1792.79	25.2	1231.92	25	299.377	25.2	-47.2633	25.1	-69.2227	25	-47.3062	25	-29.1016	25.1	-16.8609
25.1	1797.58	25.3	1245.02	25.1	305.649	25.3	-47.0953	25.2	-69.925	25.1	-47.7961	25.1	-29.4086	25.2	-17.0555
25.2	1802.32	25.4	1257.7	25.2	312.083	25.4	-46.8289	25.3	-70.6328	25.2	-48.2789	25.2	-29.7281	25.3	-17.2274
25.3	1806.98	25.5	1270.7	25.3	318.705	25.5	-46.5711	25.4	-71.3469	25.3	-48.7766	25.3	-30.0047	25.4	-17.4149
25.4	1811.59	25.6	1283.46	25.4	325.352	25.6	-46.3305	25.5	-72.0336	25.4	-49.2664	25.4	-30.2836	25.5	-17.5984
25.5	1816.29	25.7	1296.29	25.5	331.995	25.7	-46.0273	25.6	-72.7031	25.5	-49.718	25.5	-30.5875	25.6	-17.7859
25.6	1820.55	25.8	1308.77	25.6	338.623	25.8	-45.6563	25.7	-73.3899	25.6	-50.2086	25.6	-30.8875	25.7	-17.9461
25.7	1824.74	25.9	1321.02	25.7	345.299	25.9	-45.2445	25.8	-74.0648	25.7	-50.6898	25.7	-31.15	25.8	-18.1305
25.8	1828.95	26	1333.36	25.8	351.945	26	-44.7688	25.9	-74.7031	25.8	-51.1617	25.8	-31.4195	25.9	-18.3172
25.9	1832.7	26.1	1345.4	25.9	358.743	26.1	-44.332	26	-75.3656	25.9	-51.6453	25.9	-31.7086	26	-18.5125
26	1836.57	26.2	1357.5	26	365.717	26.2	-43.8672	26.1	-75.9914	26	-52.1039	26	-31.9774	26.1	-18.6961
26.1	1840.54	26.3	1369.61	26.1	372.697	26.3	-43.35	26.2	-76.632	26.1	-52.5844	26.1	-32.2477	26.2	-18.8484
26.2	1844.35	26.4	1381.5	26.2	379.584	26.4	-42.8617	26.3	-77.2727	26.2	-53.0406	26.2	-32.5328	26.3	-18.9859
26.3	1847.89	26.5	1393.06	26.3	386.513	26.5	-42.2727	26.4	-77.9133	26.3	-53.5141	26.3	-32.818	26.4	-19.1328
26.4	1851.39	26.6	1404.44	26.4	393.43	26.6	-41.7102	26.5	-78.525	26.4	-53.9898	26.4	-33.1141	26.5	-19.3172
26.5	1854.89	26.7	1416	26.5	400.642	26.7	-41.0875	26.6	-79.132	26.5	-54.4508	26.5	-33.3922	26.6	-19.5016
26.6	1858.26	26.8	1427.16	26.6	407.795	26.8	-40.4039	26.7	-79.7641	26.6	-54.968	26.6	-33.6617	26.7	-19.6766
26.7	1861.44	26.9	1438.46	26.7	415.009	26.9	-39.7242	26.8	-80.3789	26.7	-55.4969	26.7	-33.9586	26.8	-19.8758
26.8	1864.76	27	1449.5	26.8	422.222	27	-39.0344	26.9	-80.9984	26.8	-55.9898	26.8	-34.2625	26.9	-20.0594
26.9	1868.19	27.1	1460.44	26.9	429.445	27.1	-38.3289	27	-81.6391	26.9	-56.475	26.9	-34.568	27	-20.2274
27	1871	27.2	1471.02	27	436.702	27.2	-37.543	27.1	-82.2563	27	-56.9625	27	-34.8414	27.1	-20.3945
27.1	1873.96	27.3	1481.59	27.1	444.065	27.3	-36.7484	27.2	-82.8672	27.1	-57.4312	27.1	-35.1305	27.2	-20.5555
27.2	1876.79	27.4	1491.91	27.2	451.671	27.4	-35.9539	27.3	-83.4781	27.2	-57.9281	27.2	-35.4149	27.3	-20.725
27.3	1879.64	27.5	1502.25	27.3	459.108	27.5	-35.1164	27.4	-84.0617	27.3	-58.3805	27.3	-35.7086	27.4	-20.9023
27.4	1882.46	27.6	1512.44	27.4	466.552	27.6	-34.2313	27.5	-84.6703	27.4	-58.8461	27.4	-35.9969	27.5	-21.0672
27.5	1885.31	27.7	1522.41	27.5	473.977	27.7	-33.332	27.6	-85.2797	27.5	-59.3094	27.5	-36.2594	27.6	-21.2274
27.6	1888.16	27.8	1532.41	27.6	481.492	27.8	-32.4023	27.7	-85.8789	27.6	-59.7516	27.6	-36.5406	27.7	-21.3875
27.7	1890.69	27.9	1542.27	27.7	489.079	27.9	-31.4813	27.8	-86.475	27.7	-60.1898	27.7	-36.8367	27.8	-21.5399
27.8	1893.27	28	1551.86	27.8	496.738	28	-30.4242	27.9	-87.0485	27.8	-60.6617	27.8	-37.1031	27.9	-21.6523
27.9	1895.85	28.1	1561.05	27.9	504.37	28.1	-29.2836	28	-87.636	27.9	-61.1227	27.9	-37.3727	28	-21.7945
28	1898.27	28.2	1570.3	28	512.038	28.2	-28.1117	28.1	-88.1774	28	-61.5914	28	-37.6719	28.1	-21.9453
28.1	1900.76	28.3	1579.53	28.1	519.713	28.3	-26.932	28.2	-88.7523	28.1	-62.0688	28.1	-37.9867	28.2	-22.1031
28.2	1903.21	28.4	1588.69	28.2	527.399	28.4	-25.7399	28.3	-89.3195	28.2	-62.5359	28.2	-38.2859	28.3	-22.2703
28.3	1905.44	28.5	1597.49	28.3	535.148	28.5	-24.5258	28.4	-89.8531	28.3	-62.9867	28.3	-38.5641	28.4	-22.4141
28.4	1907.73	28.6	1606.36	28.4	542.995	28.6	-23.2953	28.5	-90.4	28.4	-63.4469	28.4	-38.8531	28.5	-22.5758
28.5	1909.97	28.7	1614.93	28.5	550.866	28.7	-22.0797	28.6	-90.9406	28.5	-63.8727	28.5	-39.1328	28.6	-22.7078
28.6	1912.19	28.8	1623.53	28.6	558.858	28.8	-20.8734	28.7	-91.4899	28.6	-64.3188	28.6	-39.4164	28.7	-22.875
28.7	1914.45	28.9	1631.94	28.7	566.816	28.9	-19.6336	28.8	-92.0375	28.7	-64.7703	28.7	-39.6883	28.8	-23.0406
28.8	1916.61	29	1640.16	28.8	574.648	29	-18.2508	28.9	-92.5375	28.8	-65.193	28.8	-39.9774	28.9	-23.2109
28.9	1918.66	29.1	1648.15	28.9	582.528	29.1	-16.8211	29	-93.0563	28.9	-65.6266	28.9	-40.2711	29	-23.3922
29	1920.68	29.2	1656.25	29	590.484	29.2	-15.3914	29.1	-93.5672	29	-66.025	29	-40.5672	29.1	-23.5555
29.1	1922.64	29.3	1664.32	29.1	598.448	29.3	-13.9375	29.2	-94.0844	29.1	-66.4156	29.1	-40.8367	29.2	-23.7313
29.2	1924.54	29.4	1672.22	29.2	606.431	29.4	-12.4531	29.3	-94.6203	29.2	-66.868	29.2	-41.1109	29.3	-23.8602
29.3	1926.51	29.5	1679.72	29.3	614.507	29.5	-10.9414	29.4	-95.1461	29.3	-67.3578	29.3	-41.3797	29.4	-23.9922
29.4	1928.38	29.6	1687.27	29.4	622.614	29.6	-9.4133	29.5	-95.6617	29.4	-67.8406	29.4	-41.6492	29.5	-24.1844
29.5	1930.27	29.7	1694.58	29.5	630.863	29.7	-7.82031	29.6	-96.1735	29.5	-68.3062	29.5	-41.9117	29.6	-24.3453
29.6	1932.09	29.8	1701.78	29.6	639.007	29.8	-6.21329	29.7	-96.6656	29.6	-68.7555	29.6	-42.1883	29.7	-24.4844
29.7	1933.92	29.9	1708.89	29.7	646.979	29.9	-4.57346	29.8	-97.1508	29.7	-69.1922	29.7	-42.4742	29.8	-24.618
29.8	1935.75	30	1715.96	29.8	655.162	30	-2.94064	29.9	-97.6102	29.8	-69.6266	29.8	-42.7539	29.9	-24.7617
29.9	1937.57	30.1	1722.64	29.9	663.402	30.1	-1.27893	30	-98.1078	29.9	-70.0875	29.9	-43.0375	30	-24.9117
30	1939.36	30.2	1729.37	30	671.663	30.2	0.367188	30.1	-98.5953	30	-70.5172	30	-43.3211	30.1	-25.0742
30.1	1941.19	30.3	1736.05	30.1	679.909	30.3	2.03748	30.2	-99.0563	30.1	-70.9422	30.1	-43.5867	30.2	-25.2469
30.2	1942.73	30.4	1742.5	30.2	688.036	30.4	3.79529	30.3	-99.5172	30.2	-71.3883	30.2	-43.8766	30.3	-25.407
30.3	1944.33	30.5	1748.95	30.3	696.259	30.5	5.63513	30.4	-99.9461	30.3	-71.8133	30.3	-44.1414	30.4	-25.5672
30.4	1945.97	30.6	1755.36	30.4	704.565	30.6	7.51794	30.5	-100.393	30.4	-72.2281	30.4	-44.3992	30.5	-25.7633
30.5	1947.58	30.7	1761.56	30.5	712.85	30.7	9.37811	30.6	-100.833	30.5	-72.6727	30.5	-44.6688	30.6	-25.9531
30.6	1949.22	30.8	1767.6	30.6	721.135	30.8	11.2766	30.7	-101.255	30.6	-73.0922	30.6	-44.9578	30.7	-26.1258
30.7	1950.77	30.9	1773.58	30.7	729.429	30.9	13.2258	30.8	-101.689	30.7	-73.532	30.7	-45.232	30.8	-26.3023
30.8	1952.2	31	1779.67	30.8	737.777	31	15.1859	30.9	-102.13	30.8	-73.9742	30.8	-45.5156	30.9	-26.4695
30.9	1953.64	31.1	1785.07	30.9	746.278	31.1	17.2031	31	-102.555	30.9	-74.4234	30.9	-45.7828	31	-26.6445
31	1955.07	31.2	1790.85	31	754.795	31.2	19.2742	31.1	-102.985	31	-74.8648	31	-46.0281	31.1	-26.8172
31.1	1956.56	31.3	1796.5	31.1	763.154	31.3	21.3125	31.2	-103.385	31.1	-75.3258	31.1	-46.2899	31.2	-26.9891
31.2	1958.04	31.4	1801.9	31.2	771.415	31.4	23.3563	31.3	-103.813	31.2	-75.7742	31.2	-46.5523	31.3	-27.1539
31.3	1959.47	31.5	1807.35	31.3	779.754	31.5	25.4445	31.4	-104.24	31.3	-76.2016	31.3	-46.8164	31.4	-27.3164
31.4	1960.93	31.6	1812.64	31.4	788.132	31.6	27.5078	31.5	-104.657	31.4	-76.6531	31.4	-47.0836	31.5	-27.5008
31.5	1962.34	31.7	1818.09	31.5	796.526	31.7	29.5836	31.6	-105.045	31.5	-77.0992	31.5	-47.3648	31.6	-27.6531
31.6	1963.64	31.8	1823.12	31.6	804.974	31.8	31.8179	31.7	-105.43	31.6	-77.5125	31.6	-47.6367	31.7	-27.7609
31.7	1964.93	31.9	1828.07	31.7	813.403	31.9	34.0992	31.8	-105.817	31.7	-77.9422	31.7	-47.8875	31.8	-27.9188
31.8	1966.29	32	1832.94	31.8	821.844	32	36.3711	31.9	-106.195	31.8	-78.3766	31.8	-48.1688	31.9	-28.0828
31.9	1967.6	32.1	1837.73	31.9	830.22	32.1	38.6031	32	-106.571	31.9	-78.7984	31.9	-48.4352	32	-28.2344
32	1968.93	32.2	1842.48	32	838.603	32.2	40.9484	32.1	-106.943	32	-79.2117	32	-48.7164	32.1	-28.3844
32.1	1970.34	32.3	1847.16	32.1	847.041	32.3	43.307	32.2	-107.298	32.1	-79.6414	32.1	-49.0078	32.2	-28.5273
32.2	1971.59	32.4	1851.88	32.2	855.519	32.4	45.65	32.3	-107.68	32.2	-80.0484	32.2	-49.2828	32.3	-28.6836
32.3	1972.8	32.5	1856.32	32.3	864.045	32.5	47.9633	32.4	-108.02	32.3	-80.4711	32.3	-49.5547	32.4	-28.8336
32.4	1974	32.6	1860.69	32.4	872.491	32.6	50.3773	32.5	-108.324	32.4	-80.8953	32.4	-49.8094	32.5	-29.0156
32.5	1975.19	32.7	1865.13	32.5	880.88	32.7	52.7648	32.6	-108.666	32.5	-81.3086	32.5	-50.0594	32.6	-29.1461
32.6	1976.41	32.8	1869.44	32.6	889.278	32.8	55.1625	32.7	-109.016	32.6	-81.7086	32.6	-50.3453	32.7	-29.2899
32.7	1977.57	32.9	1873.78	32.7	897.747	32.9	57.5977	32.8	-109.316	32.7	-82.1187	32.7	-50.625	32.8	-29.4844
32.8	1978.69	33	1877.94	32.8	906.209	33	60.1445	32.9	-109.634	32.8	-82.5633	32.8	-50.9031	32.9	-29.657
32.9	1979.82	33.1	1882.11	32.9	914.7	33.1	62.707	33	-109.922	32.9	-82.9703	32.9	-51.1539	33	-29.8094
33	1980.99	33.2	1885.99	33	923.175	33.2	65.2219	33.1	-110.199	33	-83.3922	33	-51.4188	33.1	-29.9648
33.1	1982.11	33.3	1889.88	33.1	931.398	33.3	67.7508	33.2	-110.49	33.1	-83.8008	33.1	-51.6727	33.2	-30.1227
33.2	1983.26	33.4	1893.72	33.2	939.776	33.4	70.3156	33.3	-110.769	33.2	-84.2039	33.2	-51.9227	33.3	-30.282
33.3	1984.4	33.5	1897.46	33.3	948.137	33.5	72.8078	33.4	-111.036	33.3	-84.607	33.3	-52.168	33.4	-30.4375
33.4	1985.53	33.6	1901.3	33.4	956.594	33.6	75.3563	33.5	-111.316	33.4	-85.032	33.4	-52.4469	33.5	-30.5859
33.5	1986.61	33.7	1904.97	33.5	964.991	33.7	78.0203	33.6	-111.61	33.5	-85.4656	33.5	-52.7352	33.6	-30.7117
33.6	1987.71	33.8	1908.91	33.6	973.18	33.8	80.6851	33.7	-111.855	33.6	-85.8734	33.6	-52.9961	33.7	-30.868
33.7	1988.79	33.9	1912.43	33.7	981.407	33.9	83.3719	33.8	-112.084	33.7	-86.2781	33.7	-53.2703	33.8	-31.0516
33.8	1989.84	34	1915.83	33.8	989.595	34	86.064	33.9	-112.363	33.8	-86.6695	33.8	-53.532	33.9	-31.2
33.9	1990.91	34.1	1919.22	33.9	997.873	34.1	88.7984	34	-112.613	33.9	-87.0594	33.9	-53.8062	34	-31.3508
34	1991.94	34.2	1922.61	34	1006.09	34.2	91.5508	34.1	-112.895	34	-87.4609	34	-54.0898	34.1	-31.5133
34.1	1993.01	34.3	1926.09	34.1	1014.35	34.3	94.3148	34.2	-113.144	34.1	-87.8687	34.1	-54.3555	34.2	-31.7031
34.2	1994.01	34.4	1929.26	34.2	1022.56	34.4	97.1195	34.3	-113.375	34.2	-88.2906	34.2	-54.6313	34.3	-31.8914
34.3	1994.97	34.5	1932.39	34.3	1030.78	34.5	99.9086	34.4	-113.629	34.3	-88.6914	34.3	-54.8937	34.4	-32.0547
34.4	1995.91	34.6	1935.5	34.4	1039.05	34.6	102.712	34.5	-113.855	34.4	-89.1063	34.4	-55.1148	34.5	-32.2242
34.5	1996.86	34.7	1938.65	34.5	1047.33	34.7	105.545	34.6	-114.022	34.5	-89.4774	34.5	-55.3524	34.6	-32.4063
34.6	1997.84	34.8	1941.86	34.6	1055.42	34.8	108.41	34.7	-114.214	34.6	-89.8563	34.6	-55.625	34.7	-32.5828
34.7	1998.83	34.9	1945.13	34.7	1063.51	34.9	111.31	34.8	-114.403	34.7	-90.2242	34.7	-55.8883	34.8	-32.7344
34.8	1999.76	35	1947.86	34.8	1071.45	35	114.207	34.9	-114.556	34.8	-90.6211	34.8	-56.1289	34.9	-32.8867
34.9	2000.71	35.1	1950.84	34.9	1079.45	35.1	117.14	35	-114.719	34.9	-91.0328	34.9	-56.3524	35	-33.0523
35	2001.69	35.2	1953.68	35	1087.42	35.2	120.116	35.1	-114.866	35	-91.4461	35	-56.5711	35.1	-33.2062
35.1	2002.66	35.3	1956.58	35.1	1095.42	35.3	123.094	35.2	-114.991	35.1	-91.8367	35.1	-56.8297	35.2	-33.318
35.2	2003.61	35.4	1959.31	35.2	1103.11	35.4	126.074	35.3	-115.116	35.2	-92.2352	35.2	-57.1172	35.3	-33.4719
35.3	2004.56	35.5	1962	35.3	1111.13	35.5	129.098	35.4	-115.234	35.3	-92.618	35.3	-57.3687	35.4	-33.6102
35.4	2005.51	35.6	1964.7	35.4	1119.07	35.6	132.148	35.5	-115.359	35.4	-93.0086	35.4	-57.6359	35.5	-33.7461
35.5	2006.47	35.7	1967.37	35.5	1126.9	35.7	135.23	35.6	-115.495	35.5	-93.3953	35.5	-57.8836	35.6	-33.9
35.6	2007.42	35.8	1969.97	35.6	1134.65	35.8	138.326	35.7	-115.635	35.6	-93.8023	35.6	-58.1336	35.7	-34.0789
35.7	2008.37	35.9	1972.61	35.7	1142.44	35.9	141.441	35.8	-115.753	35.7	-94.2274	35.7	-58.3758	35.8	-34.2313
35.8	2009.3	36	1975.15	35.8	1150.17	36	144.552	35.9	-115.865	35.8	-94.6453	35.8	-58.6172	35.9	-34.3742
35.9	2010.17	36.1	1977.72	35.9	1157.84	36.1	147.657	36	-115.952	35.9	-95.0328	35.9	-58.8914	36	-34.5211
36	2011.09	36.2	1980.16	36	1165.48	36.2	150.786	36.1	-116.062	36	-95.4141	36	-59.1383	36.1	-34.7117
36.1	2011.95	36.3	1982.56	36.1	1173.1	36.3	153.887	36.2	-116.19	36.1	-95.9	36.1	-59.3633	36.2	-34.8555
36.2	2012.75	36.4	1984.95	36.2	1180.64	36.4	156.977	36.3	-116.26	36.2	-96.3797	36.2	-59.5867	36.3	-35.0133
36.3	2013.62	36.5	1987.34	36.3	1188.13	36.5	160.198	36.4	-116.334	36.3	-96.7031	36.3	-59.8351	36.4	-35.1758
36.4	2014.31	36.6	1989.73	36.4	1195.62	36.6	163.538	36.5	-116.402	36.4	-97.025	36.4	-60.0797	36.5	-35.3289
36.5	2015.14	36.7	1992.16	36.5	1203.13	36.7	166.863	36.6	-116.467	36.5	-97.293	36.5	-60.3203	36.6	-35.4961
36.6	2015.93	36.8	1994.55	36.6	1210.49	36.8	170.213	36.7	-116.505	36.6	-97.7274	36.6	-60.5555	36.7	-35.6563
36.7	2016.72	36.9	1996.64	36.7	1217.91	36.9	173.558	36.8	-116.51	36.7	-98.1422	36.7	-60.782	36.8	-35.7984
36.8	2017.46	37	1998.77	36.8	1225.35	37	176.877	36.9	-116.546	36.8	-98.543	36.8	-61.0438	36.9	-35.9453
36.9	2018.22	37.1	2000.9	36.9	1232.5	37.1	180.162	37	-116.595	36.9	-98.907	36.9	-61.2891	37	-36.0781
37	2019.02	37.2	2002.98	37	1239.61	37.2	183.513	37.1	-116.604	37	-99.2828	37	-61.5125	37.1	-36.2156
37.1	2019.84	37.3	2005.11	37.1	1246.72	37.3	186.878	37.2	-116.606	37.1	-99.6367	37.1	-61.7477	37.2	-36.3445
37.2	2020.58	37.4	2007.18	37.2	1253.86	37.4	190.229	37.3	-116.601	37.2	-99.9844	37.2	-62.0078	37.3	-36.5109
37.3	2021.34	37.5	2009.21	37.3	1260.93	37.5	193.573	37.4	-116.591	37.3	-100.368	37.3	-62.2578	37.4	-36.6531
37.4	2022.13	37.6	2011.26	37.4	1267.94	37.6	196.934	37.5	-116.591	37.4	-100.727	37.4	-62.4977	37.5	-36.8016
37.5	2022.87	37.7	2013.28	37.5	1274.96	37.7	200.372	37.6	-116.583	37.5	-101.103	37.5	-62.7664	37.6	-36.9328
37.6	2023.63	37.8	2015.31	37.6	1281.9	37.8	203.844	37.7	-116.552	37.6	-101.477	37.6	-63.0273	37.7	-37.075
37.7	2024.39	37.9	2017.36	37.7	1288.8	37.9	207.38	37.8	-116.479	37.7	-101.841	37.7	-63.318	37.8	-37.1992
37.8	2025.14	38	2019.3	37.8	1295.57	38	210.919	37.9	-116.442	37.8	-102.234	37.8	-63.593	37.9	-37.3359
37.9	2025.89	38.1	2021.16	37.9	1302.25	38.1	214.485	38	-116.377	37.9	-102.548	37.9	-63.8297	38	-37.4774
38	2026.63	38.2	2022.95	38	1309.01	38.2	218.061	38.1	-116.321	38	-102.868	38	-64.0656	38.1	-37.6484
38.1	2027.35	38.3	2024.75	38.1	1315.66	38.3	221.654	38.2	-116.263	38.1	-103.203	38.1	-64.2859	38.2	-37.7899
38.2	2028.07	38.4	2026.57	38.2	1322.21	38.4	225.251	38.3	-116.212	38.2	-103.606	38.2	-64.5438	38.3	-37.9422
38.3	2028.79	38.5	2028.36	38.3	1328.81	38.5	228.83	38.4	-116.111	38.3	-103.986	38.3	-64.7734	38.4	-38.0859
38.4	2029.52	38.6	2030.15	38.4	1335.35	38.6	232.391	38.5	-116.013	38.4	-104.352	38.4	-65.0164	38.5	-38.2242
38.5	2030.23	38.7	2031.94	38.5	1341.91	38.7	236.002	38.6	-115.927	38.5	-104.734	38.5	-65.2391	38.6	-38.3477
38.6	2030.94	38.8	2033.68	38.6	1348.39	38.8	239.655	38.7	-115.832	38.6	-105.141	38.6	-65.425	38.7	-38.5008
38.7	2031.65	38.9	2035.41	38.7	1354.84	38.9	243.276	38.8	-115.688	38.7	-105.516	38.7	-65.6453	38.8	-38.6445
38.8	2032.36	39	2037.07	38.8	1361.06	39	246.96	38.9	-115.54	38.8	-105.883	38.8	-65.9297	38.9	-38.8281
38.9	2033.07	39.1	2038.72	38.9	1367.27	39.1	250.644	39	-115.412	38.9	-106.255	38.9	-66.2859	39	-38.9539
39	2033.77	39.2	2040.35	39	1373.47	39.2	254.307	39.1	-115.277	39	-106.634	39	-66.6141	39.1	-39.1024
39.1	2034.46	39.3	2042.02	39.1	1379.6	39.3	258.007	39.2	-115.141	39.1	-106.996	39.1	-66.8758	39.2	-39.2578
39.2	2035.14	39.4	2043.71	39.2	1385.73	39.4	261.718	39.3	-114.992	39.2	-107.348	39.2	-67.0625	39.3	-39.3664
39.3	2035.83	39.5	2045.31	39.3	1391.76	39.5	265.414	39.4	-114.833	39.3	-107.7	39.3	-67.2664	39.4	-39.4703
39.4	2036.48	39.6	2046.93	39.4	1397.72	39.6	269.16	39.5	-114.688	39.4	-108.079	39.4	-67.5047	39.5	-39.5898
39.5	2037.18	39.7	2048.57	39.5	1403.63	39.7	272.986	39.6	-114.547	39.5	-108.45	39.5	-67.7453	39.6	-39.7062
39.6	2037.88	39.8	2050.2	39.6	1409.62	39.8	276.816	39.7	-114.324	39.6	-108.809	39.6	-67.993	39.7	-39.8398
39.7	2038.53	39.9	2051.75	39.7	1415.47	39.9	280.653	39.8	-114.098	39.7	-109.145	39.7	-68.2305	39.8	-39.9547
39.8	2039.12	40	2053.2	39.8	1421.23	40	284.482	39.9	-113.918	39.8	-109.486	39.8	-68.4703	39.9	-40.0977
39.9	2039.73	40.1	2054.72	39.9	1426.93	40.1	288.321	40	-113.711	39.9	-109.831	39.9	-68.7031	40	-40.2266
40	2040.37	40.2	2056.18	40	1432.58	40.2	292.169	40.1	-113.473	40	-110.169	40	-68.9188	40.1	-40.407
40.1	2041.03	40.3	2057.59	40.1	1438.18	40.3	296.041	40.2	-113.25	40.1	-110.525	40.1	-69.1602	40.2	-40.6016
40.2	2041.67	40.4	2058.98	40.2	1443.85	40.4	299.923	40.3	-113.012	40.2	-110.859	40.2	-69.4219	40.3	-40.7867
40.3	2042.32	40.5	2060.39	40.3	1449.28	40.5	303.791	40.4	-112.781	40.3	-111.207	40.3	-69.6649	40.4	-40.9297
40.4	2042.94	40.6	2061.84	40.4	1455.01	40.6	307.681	40.5	-112.566	40.4	-111.571	40.4	-69.9258	40.5	-41.0625
40.5	2043.59	40.7	2063.21	40.5	1460.35	40.7	311.631	40.6	-112.34	40.5	-111.926	40.5	-70.1844	40.6	-41.1836
40.6	2044.26	40.8	2064.61	40.6	1465.53	40.8	315.596	40.7	-112.102	40.6	-112.277	40.6	-70.4102	40.7	-41.2969
40.7	2044.93	40.9	2066.04	40.7	1470.78	40.9	319.554	40.8	-111.839	40.7	-112.634	40.7	-70.6336	40.8	-41.4539
40.8	2045.55	41	2067.4	40.8	1476.02	41	323.522	40.9	-111.586	40.8	-112.965	40.8	-70.8641	40.9	-41.6094
40.9	2046.12	41.1	2068.69	40.9	1481.24	41.1	327.476	41	-111.305	40.9	-113.328	40.9	-71.0938	41	-41.7695
41	2046.73	41.2	2069.98	41	1486.32	41.2	331.484	41.1	-111.041	41	-113.653	41	-71.3172	41.1	-41.9453
41.1	2047.34	41.3	2071.25	41.1	1491.42	41.3	335.491	41.2	-110.777	41.1	-113.973	41.1	-71.5633	41.2	-42.0984
41.2	2047.89	41.4	2072.53	41.2	1496.52	41.4	339.555	41.3	-110.448	41.2	-114.301	41.2	-71.8047	41.3	-42.2625
41.3	2048.43	41.5	2073.84	41.3	1501.63	41.5	343.664	41.4	-110.12	41.3	-114.629	41.3	-71.9914	41.4	-42.4063
41.4	2049.01	41.6	2075.11	41.4	1506.77	41.6	347.797	41.5	-109.828	41.4	-114.954	41.4	-72.1797	41.5	-42.568
41.5	2049.58	41.7	2076.4	41.5	1511.81	41.7	351.841	41.6	-109.495	41.5	-115.273	41.5	-72.3953	41.6	-42.7297
41.6	2050.15	41.8	2077.7	41.6	1516.63	41.8	355.895	41.7	-109.12	41.6	-115.602	41.6	-72.6258	41.7	-42.8984
41.7	2050.74	41.9	2078.92	41.7	1521.41	41.9	359.965	41.8	-108.765	41.7	-115.93	41.7	-72.875	41.8	-43.0367
41.8	2051.34	42	2080.09	41.8	1526.18	42	364.02	41.9	-108.416	41.8	-116.255	41.8	-73.0898	41.9	-43.175
41.9	2051.94	42.1	2081.32	41.9	1530.92	42.1	368.119	42	-108.03	41.9	-116.582	41.9	-73.3289	42	-43.3297
42	2052.56	42.2	2082.54	42	1535.68	42.2	372.216	42.1	-107.643	42	-116.891	42	-73.5656	42.1	-43.4641
42.1	2053.21	42.3	2083.7	42.1	1540.39	42.3	376.412	42.2	-107.276	42.1	-117.238	42.1	-73.7984	42.2	-43.5859
42.2	2053.81	42.4	2084.86	42.2	1545.09	42.4	380.619	42.3	-106.873	42.2	-117.575	42.2	-74.0625	42.3	-43.7188
42.3	2054.37	42.5	2086.01	42.3	1549.72	42.5	384.779	42.4	-106.488	42.3	-117.891	42.3	-74.2883	42.4	-43.8524
42.4	2054.9	42.6	2087.18	42.4	1554.17	42.6	388.964	42.5	-106.13	42.4	-118.223	42.4	-74.5289	42.5	-43.9961
42.5	2055.43	42.7	2088.32	42.5	1558.63	42.7	393.189	42.6	-105.698	42.5	-118.551	42.5	-74.7852	42.6	-44.1336
42.6	2055.99	42.8	2089.47	42.6	1562.99	42.8	397.421	42.7	-105.288	42.6	-118.859	42.6	-74.9969	42.7	-44.2742
42.7	2056.55	42.9	2090.61	42.7	1567.38	42.9	401.624	42.8	-104.884	42.7	-119.187	42.7	-75.2375	42.8	-44.4297
42.8	2057.11	43	2091.69	42.8	1571.73	43	405.818	42.9	-104.47	42.8	-119.486	42.8	-75.4727	42.9	-44.5898
42.9	2057.64	43.1	2092.76	42.9	1576.03	43.1	410.066	43	-104.055	42.9	-119.835	42.9	-75.7125	43	-44.7305
43	2058.22	43.2	2093.84	43	1580.29	43.2	414.305	43.1	-103.647	43	-120.16	43	-75.9531	43.1	-44.8555
43.1	2058.8	43.3	2094.92	43.1	1584.45	43.3	418.491	43.2	-103.231	43.1	-120.488	43.1	-76.1719	43.2	-45.0078
43.2	2059.35	43.4	2096	43.2	1588.58	43.4	422.711	43.3	-102.764	43.2	-120.805	43.2	-76.4219	43.3	-45.1531
43.3	2059.9	43.5	2097.1	43.3	1592.68	43.5	426.945	43.4	-102.266	43.3	-121.116	43.3	-76.6445	43.4	-45.3055
43.4	2060.46	43.6	2098.18	43.4	1596.73	43.6	431.22	43.5	-101.759	43.4	-121.451	43.4	-76.868	43.5	-45.4641
43.5	2061.03	43.7	2099.29	43.5	1600.82	43.7	435.598	43.6	-101.264	43.5	-121.765	43.5	-77.0938	43.6	-45.6063
43.6	2061.56	43.8	2100.39	43.6	1604.8	43.8	439.958	43.7	-100.779	43.6	-122.098	43.6	-77.3398	43.7	-45.7156
43.7	2062.09	43.9	2101.34	43.7	1608.75	43.9	444.285	43.8	-100.283	43.7	-122.446	43.7	-77.582	43.8	-45.8547
43.8	2062.62	44	2102.35	43.8	1612.74	44	448.623	43.9	-99.7711	43.8	-122.757	43.8	-77.8172	43.9	-45.9656
43.9	2063.15	44.1	2103.37	43.9	1616.65	44.1	452.941	44	-99.2586	43.9	-123.048	43.9	-78.0187	44	-46.0828
44	2063.65	44.2	2104.38	44	1620.33	44.2	457.263	44.1	-98.7321	44	-123.332	44	-78.2516	44.1	-46.2383
44.1	2064.14	44.3	2105.37	44.1	1624.11	44.3	461.595	44.2	-98.2125	44.1	-123.655	44.1	-78.457	44.2	-46.3937
44.2	2064.65	44.4	2106.36	44.2	1627.89	44.4	465.959	44.3	-97.6649	44.2	-123.973	44.2	-78.6789	44.3	-46.5273
44.3	2065.17	44.5	2107.4	44.3	1631.64	44.5	470.337	44.4	-97.1266	44.3	-124.278	44.3	-78.8797	44.4	-46.6609
44.4	2065.67	44.6	2108.36	44.4	1635.32	44.6	474.693	44.5	-96.5906	44.4	-124.577	44.4	-79.0938	44.5	-46.8086
44.5	2066.2	44.7	2109.27	44.5	1638.94	44.7	479.096	44.6	-96.025	44.5	-124.883	44.5	-79.3289	44.6	-46.9422
44.6	2066.73	44.8	2110.17	44.6	1642.54	44.8	483.485	44.7	-95.4422	44.6	-125.172	44.6	-79.5578	44.7	-47.0898
44.7	2067.24	44.9	2111.09	44.7	1646.02	44.9	487.859	44.8	-94.8719	44.7	-125.468	44.7	-79.8055	44.8	-47.2352
44.8	2067.73	45	2112.02	44.8	1649.59	45	492.256	44.9	-94.2899	44.8	-125.734	44.8	-80.0352	44.9	-47.3906
44.9	2068.27	45.1	2112.96	44.9	1653.07	45.1	496.742	45	-93.7117	44.9	-126.03	44.9	-80.2687	45	-47.5461
45	2068.77	45.2	2113.85	45	1656.48	45.2	501.213	45.1	-93.1297	45	-126.293	45	-80.5211	45.1	-47.7039
45.1	2069.3	45.3	2114.74	45.1	1659.95	45.3	505.655	45.2	-92.5602	45.1	-126.606	45.1	-80.7383	45.2	-47.8133
45.2	2069.79	45.4	2115.63	45.2	1663.25	45.4	510.102	45.3	-91.9766	45.2	-126.885	45.2	-80.9797	45.3	-47.9336
45.3	2070.32	45.5	2116.55	45.3	1666.53	45.5	514.541	45.4	-91.4305	45.3	-127.172	45.3	-81.1883	45.4	-48.0461
45.4	2070.83	45.6	2117.45	45.4	1669.77	45.6	518.98	45.5	-90.7906	45.4	-127.441	45.4	-81.4367	45.5	-48.1649
45.5	2071.29	45.7	2118.33	45.5	1673.06	45.7	523.445	45.6	-90.157	45.5	-127.739	45.5	-81.6656	45.6	-48.2844
45.6	2071.78	45.8	2119.19	45.6	1676.27	45.8	527.827	45.7	-89.5188	45.6	-128.023	45.6	-81.8781	45.7	-48.3906
45.7	2072.28	45.9	2120.04	45.7	1679.39	45.9	532.238	45.8	-88.8758	45.7	-128.296	45.7	-82.0594	45.8	-48.4258
45.8	2072.78	46	2120.89	45.8	1682.51	46	536.704	45.9	-88.25	45.8	-128.594	45.8	-82.2656	45.9	-48.5562
45.9	2073.28	46.1	2121.78	45.9	1685.61	46.1	541.212	46	-87.6016	45.9	-128.895	45.9	-82.468	46	-48.7305
46	2073.74	46.2	2122.67	46	1688.71	46.2	545.72	46.1	-86.9266	46	-129.164	46	-82.6805	46.1	-48.8789
46.1	2074.22	46.3	2123.54	46.1	1691.79	46.3	550.2	46.2	-86.2344	46.1	-129.46	46.1	-82.882	46.2	-49.0117
46.2	2074.71	46.4	2124.42	46.2	1694.87	46.4	554.723	46.3	-85.582	46.2	-129.73	46.2	-83.0742	46.3	-49.1453
46.3	2075.2	46.5	2125.31	46.3	1697.87	46.5	559.192	46.4	-84.9023	46.3	-130.016	46.3	-83.2813	46.4	-49.2844
46.4	2075.66	46.6	2126.23	46.4	1700.88	46.6	563.716	46.5	-84.2469	46.4	-130.28	46.4	-83.5008	46.5	-49.4102
46.5	2076.17	46.7	2127.07	46.5	1703.77	46.7	568.235	46.6	-83.593	46.5	-130.574	46.5	-83.6906	46.6	-49.5438
46.6	2076.66	46.8	2127.81	46.6	1706.68	46.8	572.791	46.7	-82.8992	46.6	-130.878	46.6	-83.9188	46.7	-49.6641
46.7	2077.13	46.9	2128.63	46.7	1709.48	46.9	577.396	46.8	-82.2305	46.7	-131.159	46.7	-84.1398	46.8	-49.7844
46.8	2077.6	47	2129.42	46.8	1712.29	47	581.952	46.9	-81.55	46.8	-131.441	46.8	-84.3711	46.9	-49.9031
46.9	2078.06	47.1	2130.21	46.9	1715.12	47.1	586.525	47	-80.875	46.9	-131.703	46.9	-84.5938	47	-50.0117
47	2078.54	47.2	2131.01	47	1717.9	47.2	591.087	47.1	-80.1953	47	-131.977	47	-84.8289	47.1	-50.1172
47.1	2079.01	47.3	2131.81	47.1	1720.71	47.3	595.691	47.2	-79.5273	47.1	-132.269	47.1	-85.0352	47.2	-50.2664
47.2	2079.48	47.4	2132.62	47.2	1723.39	47.4	600.307	47.3	-78.7844	47.2	-132.562	47.2	-85.2539	47.3	-50.3976
47.3	2079.9	47.5	2133.43	47.3	1726.06	47.5	604.884	47.4	-78.0555	47.3	-132.832	47.3	-85.4922	47.4	-50.5242
47.4	2080.33	47.6	2134.21	47.4	1728.71	47.6	609.354	47.5	-77.3352	47.4	-133.086	47.4	-85.7227	47.5	-50.6555
47.5	2080.78	47.7	2135.06	47.5	1731.32	47.7	613.82	47.6	-76.6211	47.5	-133.343	47.5	-85.9422	47.6	-50.7695
47.6	2081.22	47.8	2135.82	47.6	1733.98	47.8	618.353	47.7	-75.8672	47.6	-133.601	47.6	-86.1953	47.7	-50.8789
47.7	2081.62	47.9	2136.55	47.7	1736.58	47.9	622.898	47.8	-75.1195	47.7	-133.848	47.7	-86.4336	47.8	-51.0242
47.8	2082.05	48	2137.3	47.8	1739.08	48	627.433	47.9	-74.2844	47.8	-134.093	47.8	-86.6437	47.9	-51.1523
47.9	2082.48	48.1	2138.01	47.9	1741.57	48.1	631.972	48	-73.4672	47.9	-134.328	47.9	-86.8359	48	-51.2539
48	2082.93	48.2	2138.75	48	1744.09	48.2	636.519	48.1	-72.6516	48	-134.573	48	-87.043	48.1	-51.3742
48.1	2083.35	48.3	2139.46	48.1	1746.57	48.3	641.105	48.2	-71.875	48.1	-134.811	48.1	-87.2703	48.2	-51.5195
48.2	2083.8	48.4	2140.16	48.2	1748.98	48.4	645.659	48.3	-71.1352	48.2	-135.047	48.2	-87.4961	48.3	-51.6383
48.3	2084.25	48.5	2140.86	48.3	1751.4	48.5	650.246	48.4	-70.3508	48.3	-135.292	48.3	-87.718	48.4	-51.7617
48.4	2084.71	48.6	2141.56	48.4	1753.76	48.6	654.855	48.5	-69.5531	48.4	-135.523	48.4	-87.9453	48.5	-51.8976
48.5	2085.14	48.7	2142.26	48.5	1756.1	48.7	659.465	48.6	-68.8195	48.5	-135.77	48.5	-88.1766	48.6	-52.0195
48.6	2085.58	48.8	2142.96	48.6	1758.45	48.8	664.032	48.7	-68.0383	48.6	-136.01	48.6	-88.4172	48.7	-52.1336
48.7	2086.04	48.9	2143.64	48.7	1760.79	48.9	668.547	48.8	-67.2766	48.7	-136.237	48.7	-88.6133	48.8	-52.2813
48.8	2086.51	49	2144.34	48.8	1763.08	49	673.102	48.9	-66.511	48.8	-136.471	48.8	-88.8563	48.9	-52.4219
48.9	2086.98	49.1	2145.06	48.9	1765.39	49.1	677.681	49	-65.6711	48.9	-136.683	48.9	-89.0633	49	-52.5516
49	2087.38	49.2	2145.75	49	1767.66	49.2	682.27	49.1	-64.85	49	-136.918	49	-89.2602	49.1	-52.7109
49.1	2087.78	49.3	2146.43	49.1	1769.9	49.3	686.832	49.2	-64.0391	49.1	-137.16	49.1	-89.4461	49.2	-52.8351
49.2	2088.19	49.4	2147.14	49.2	1772.12	49.4	691.403	49.3	-63.2211	49.2	-137.409	49.2	-89.6594	49.3	-52.9656
49.3	2088.6	49.5	2147.83	49.3	1774.27	49.5	695.973	49.4	-62.3649	49.3	-137.636	49.3	-89.8797	49.4	-53.0898
49.4	2089.01	49.6	2148.53	49.4	1776.46	49.6	700.571	49.5	-61.5149	49.4	-137.859	49.4	-90.0977	49.5	-53.2258
49.5	2089.47	49.7	2149.23	49.5	1778.65	49.7	705.083	49.6	-60.6867	49.5	-138.092	49.5	-90.3	49.6	-53.325
49.6	2089.88	49.8	2149.93	49.6	1780.74	49.8	709.611	49.7	-59.8344	49.6	-138.316	49.6	-90.4914	49.7	-53.4883
49.7	2090.32	49.9	2150.63	49.7	1782.8	49.9	714.139	49.8	-58.9828	49.7	-138.534	49.7	-90.7	49.8	-53.668
49.8	2090.82	50	2151.32	49.8	1784.88	50	718.649	49.9	-58.15	49.8	-138.745	49.8	-90.9336	49.9	-53.8172
49.9	2091.32	50.1	2152	49.9	1786.93	50.1	723.186	50	-57.2789	49.9	-138.968	49.9	-91.1125	50	-53.9414
50	2091.72	50.2	2152.66	50	1788.96	50.2	727.728	50.1	-56.4367	50	-139.177	50	-91.3164	50.1	-54.082
50.1	2092.06	50.3	2153.3	50.1	1790.92	50.3	732.299	50.2	-55.5844	50.1	-139.405	50.1	-91.5078	50.2	-54.218
50.2	2092.44	50.4	2153.95	50.2	1792.92	50.4	736.893	50.3	-54.6891	50.2	-139.628	50.2	-91.7188	50.3	-54.3641
50.3	2092.83	50.5	2154.63	50.3	1794.93	50.5	741.459	50.4	-53.8148	50.3	-139.832	50.3	-91.918	50.4	-54.4953
50.4	2093.25	50.6	2155.24	50.4	1796.87	50.6	746.03	50.5	-52.9438	50.4	-140.056	50.4	-92.1047	50.5	-54.6375
50.5	2093.66	50.7	2155.89	50.5	1798.78	50.7	750.569	50.6	-52.0485	50.5	-140.281	50.5	-92.2969	50.6	-54.7617
50.6	2094.04	50.8	2156.51	50.6	1800.68	50.8	755.1	50.7	-51.1594	50.6	-140.502	50.6	-92.4719	50.7	-54.8828
50.7	2094.45	50.9	2157.14	50.7	1802.61	50.9	759.632	50.8	-50.2664	50.7	-140.714	50.7	-92.6609	50.8	-55.007
50.8	2094.86	51	2157.75	50.8	1804.54	51	764.19	50.9	-49.3625	50.8	-140.945	50.8	-92.8625	50.9	-55.118
50.9	2095.26	51.1	2158.36	50.9	1806.34	51.1	768.717	51	-48.4188	50.9	-141.187	50.9	-93.0469	51	-55.25
51	2095.66	51.2	2158.99	51	1808.15	51.2	773.217	51.1	-47.4899	51	-141.437	51	-93.2578	51.1	-55.3664
51.1	2096.15	51.3	2159.62	51.1	1809.98	51.3	777.698	51.2	-46.5609	51.1	-141.667	51.1	-93.4523	51.2	-55.5047
51.2	2096.53	51.4	2160.24	51.2	1811.82	51.4	782.226	51.3	-45.6227	51.2	-141.873	51.2	-93.6367	51.3	-55.6328
51.3	2096.9	51.5	2160.9	51.3	1813.66	51.5	786.773	51.4	-44.7125	51.3	-142.084	51.3	-93.8359	51.4	-55.7422
51.4	2097.29	51.6	2161.51	51.4	1815.45	51.6	791.237	51.5	-43.7828	51.4	-142.304	51.4	-94.0226	51.5	-55.8547
51.5	2097.7	51.7	2162.13	51.5	1817.27	51.7	795.706	51.6	-42.8375	51.5	-142.522	51.5	-94.1953	51.6	-55.9656
51.6	2098.08	51.8	2162.74	51.6	1819.12	51.8	800.167	51.7	-41.8813	51.6	-142.718	51.6	-94.375	51.7	-56.0969
51.7	2098.49	51.9	2163.32	51.7	1820.88	51.9	804.676	51.8	-40.9031	51.7	-142.929	51.7	-94.6024	51.8	-56.2031
51.8	2098.87	52	2163.9	51.8	1822.56	52	809.194	51.9	-39.9352	51.8	-143.155	51.8	-94.768	51.9	-56.3172
51.9	2099.25	52.1	2164.51	51.9	1824.16	52.1	813.72	52	-38.986	51.9	-143.344	51.9	-94.918	52	-56.4336
52	2099.67	52.2	2165.11	52	1825.79	52.2	818.23	52.1	-38.0336	52	-143.526	52	-95.125	52.1	-56.5578
52.1	2100.08	52.3	2165.7	52.1	1827.43	52.3	822.742	52.2	-37.0508	52.1	-143.701	52.1	-95.3555	52.2	-56.6914
52.2	2100.47	52.4	2166.27	52.2	1829.03	52.4	827.126	52.3	-36.0258	52.2	-143.878	52.2	-95.5469	52.3	-56.8125
52.3	2100.87	52.5	2166.84	52.3	1830.68	52.5	831.511	52.4	-35	52.3	-144.084	52.3	-95.8078	52.4	-56.9149
52.4	2101.21	52.6	2167.4	52.4	1832.26	52.6	835.922	52.5	-33.9821	52.4	-144.277	52.4	-96.0399	52.5	-57.0461
52.5	2101.61	52.7	2167.95	52.5	1833.87	52.7	840.312	52.6	-32.9578	52.5	-144.441	52.5	-96.2492	52.6	-57.1914
52.6	2101.99	52.8	2168.51	52.6	1835.48	52.8	844.711	52.7	-31.9266	52.6	-144.616	52.6	-96.582	52.7	-57.3367
52.7	2102.35	52.9	2169.08	52.7	1837.11	52.9	849.129	52.8	-30.8875	52.7	-144.771	52.7	-96.8672	52.8	-57.4797
52.8	2102.7	53	2169.68	52.8	1838.7	53	853.552	52.9	-29.8531	52.8	-144.921	52.8	-96.8633	52.9	-57.6047
52.9	2103.07	53.1	2170.26	52.9	1840.26	53.1	857.993	53	-28.8289	52.9	-145.049	52.9	-96.9648	53	-57.75
53	2103.43	53.2	2170.85	53	1841.85	53.2	862.382	53.1	-27.7899	53	-145.214	53	-97.1219	53.1	-57.8875
53.1	2103.8	53.3	2171.43	53.1	1843.45	53.3	866.751	53.2	-26.7539	53.1	-145.38	53.1	-97.3937	53.2	-58.0156
53.2	2104.15	53.4	2171.99	53.2	1845.07	53.4	871.13	53.3	-25.693	53.2	-145.55	53.2	-97.6125	53.3	-58.1328
53.3	2104.53	53.5	2172.58	53.3	1846.36	53.5	875.501	53.4	-24.6688	53.3	-145.737	53.3	-97.8281	53.4	-58.2422
53.4	2104.89	53.6	2173.15	53.4	1847.81	53.6	879.821	53.5	-23.6531	53.4	-145.877	53.4	-98.0195	53.5	-58.375
53.5	2105.27	53.7	2173.7	53.5	1849.24	53.7	884.161	53.6	-22.5828	53.5	-146.013	53.5	-98.2101	53.6	-58.4875
53.6	2105.65	53.8	2174.27	53.6	1850.69	53.8	888.539	53.7	-21.5234	53.6	-146.166	53.6	-98.418	53.7	-58.6133
53.7	2106.03	53.9	2174.81	53.7	1852.12	53.9	892.856	53.8	-20.4695	53.7	-146.323	53.7	-98.6172	53.8	-58.7305
53.8	2106.41	54	2175.35	53.8	1853.58	54	897.177	53.9	-19.3961	53.8	-146.479	53.8	-98.8281	53.9	-58.832
53.9	2106.76	54.1	2175.88	53.9	1855.03	54.1	901.504	54	-18.3235	53.9	-146.654	53.9	-99.0391	54	-58.9453
54	2107.14	54.2	2176.4	54	1856.49	54.2	905.791	54.1	-17.236	54	-146.831	54	-99.2453	54.1	-59.0508
54.1	2107.48	54.3	2176.92	54.1	1857.91	54.3	909.97	54.2	-16.1602	54.1	-146.987	54.1	-99.4406	54.2	-59.175
54.2	2107.82	54.4	2177.46	54.2	1859.29	54.4	914.267	54.3	-15.0438	54.2	-147.134	54.2	-99.6609	54.3	-59.2938
54.3	2108.18	54.5	2177.98	54.3	1860.64	54.5	918.563	54.4	-13.9297	54.3	-147.284	54.3	-99.8773	54.4	-59.4336
54.4	2108.51	54.6	2178.48	54.4	1862.03	54.6	922.827	54.5	-12.8328	54.4	-147.428	54.4	-100.086	54.5	-59.5578
54.5	2108.87	54.7	2179.02	54.5	1863.43	54.7	927.15	54.6	-11.7422	54.5	-147.58	54.5	-100.305	54.6	-59.6602
54.6	2109.2	54.8	2179.58	54.6	1864.76	54.8	931.302	54.7	-10.6328	54.6	-147.744	54.6	-100.523	54.7	-59.7781
54.7	2109.56	54.9	2180.1	54.7	1866.12	54.9	935.513	54.8	-9.50705	54.7	-147.87	54.7	-100.754	54.8	-59.9055
54.8	2109.91	55	2180.62	54.8	1867.49	55	939.74	54.9	-8.38281	54.8	-148.013	54.8	-100.969	54.9	-60.0313
54.9	2110.28	55.1	2181.15	54.9	1868.76	55.1	943.873	55	-7.24219	54.9	-148.139	54.9	-101.183	55	-60.1602
55	2110.65	55.2	2181.66	55	1869.97	55.2	948.072	55.1	-6.14532	55	-148.292	55	-101.367	55.1	-60.2891
55.1	2111	55.3	2182.22	55.1	1871.2	55.3	952.307	55.2	-5.02032	55.1	-148.427	55.1	-101.57	55.2	-60.4266
55.2	2111.38	55.4	2182.73	55.2	1872.46	55.4	956.489	55.3	-3.86642	55.2	-148.53	55.2	-101.777	55.3	-60.5305
55.3	2111.72	55.5	2183.21	55.3	1873.67	55.5	960.62	55.4	-2.76096	55.3	-148.646	55.3	-101.952	55.4	-60.6328
55.4	2112.12	55.6	2183.68	55.4	1874.91	55.6	964.737	55.5	-1.58203	55.4	-148.78	55.4	-102.122	55.5	-60.757
55.5	2112.51	55.7	2184.15	55.5	1876.13	55.7	968.889	55.6	-0.414856	55.5	-148.92	55.5	-102.316	55.6	-60.8633
55.6	2112.89	55.8	2184.62	55.6	1877.35	55.8	973.034	55.7	0.723419	55.6	-149.041	55.6	-102.495	55.7	-61.0047
55.7	2113.25	55.9	2185.1	55.7	1878.6	55.9	977.161	55.8	1.89063	55.7	-149.146	55.7	-102.68	55.8	-61.1476
55.8	2113.62	56	2185.6	55.8	1879.81	56	981.315	55.9	3.1492	55.8	-149.292	55.8	-102.855	55.9	-61.2656
55.9	2113.99	56.1	2186.08	55.9	1881.05	56.1	985.315	56	4.40311	55.9	-149.416	55.9	-103.02	56	-61.4023
56	2114.34	56.2	2186.59	56	1882.24	56.2	989.359	56.1	5.61014	56	-149.561	56	-103.188	56.1	-61.5266
56.1	2114.68	56.3	2187.07	56.1	1883.47	56.3	993.361	56.2	6.7742	56.1	-149.689	56.1	-103.382	56.2	-61.6563
56.2	2115.04	56.4	2187.55	56.2	1884.66	56.4	997.373	56.3	7.99295	56.2	-149.814	56.2	-103.566	56.3	-61.757
56.3	2115.41	56.5	2188.06	56.3	1885.82	56.5	1001.4	56.4	9.21561	56.3	-149.959	56.3	-103.753	56.4	-61.8906
56.4	2115.74	56.6	2188.58	56.4	1886.98	56.6	1005.44	56.5	10.4148	56.4	-150.116	56.4	-103.918	56.5	-62.0164
56.5	2116.07	56.7	2189.07	56.5	1888.13	56.7	1009.49	56.6	11.6289	56.5	-150.24	56.5	-104.116	56.6	-62.1281
56.6	2116.38	56.8	2189.56	56.6	1889.31	56.8	1013.5	56.7	12.8609	56.6	-150.349	56.6	-104.302	56.7	-62.2469
56.7	2116.7	56.9	2190.02	56.7	1890.46	56.9	1017.6	56.8	14.1258	56.7	-150.452	56.7	-104.487	56.8	-62.3781
56.8	2117.05	57	2190.48	56.8	1891.61	57	1021.55	56.9	15.3984	56.8	-150.576	56.8	-104.68	56.9	-62.4844
56.9	2117.38	57.1	2190.93	56.9	1892.73	57.1	1025.43	57	16.7	56.9	-150.67	56.9	-104.879	57	-62.5891
57	2117.7	57.2	2191.39	57	1893.88	57.2	1029.35	57.1	17.9812	57	-150.764	57	-105.077	57.1	-62.6883
57.1	2118.02	57.3	2191.86	57.1	1895.03	57.3	1033.27	57.2	19.2672	57.1	-150.866	57.1	-105.26	57.2	-62.8078
57.2	2118.35	57.4	2192.32	57.2	1896.13	57.4	1037.16	57.3	20.5711	57.2	-150.954	57.2	-105.434	57.3	-62.9102
57.3	2118.67	57.5	2192.83	57.3	1897.17	57.5	1041.04	57.4	21.8257	57.3	-151.034	57.3	-105.605	57.4	-63.0313
57.4	2119.01	57.6	2193.33	57.4	1898.23	57.6	1044.94	57.5	23.118	57.4	-151.111	57.4	-105.792	57.5	-63.1445
57.5	2119.39	57.7	2193.83	57.5	1899.3	57.7	1048.84	57.6	24.4117	57.5	-151.186	57.5	-106.009	57.6	-63.2648
57.6	2119.75	57.8	2194.29	57.6	1900.4	57.8	1052.65	57.7	25.7078	57.6	-151.294	57.6	-106.206	57.7	-63.407
57.7	2120.11	57.9	2194.76	57.7	1901.47	57.9	1056.51	57.8	27.0093	57.7	-151.369	57.7	-106.373	57.8	-63.5187
57.8	2120.44	58	2195.26	57.8	1902.51	58	1060.28	57.9	28.3148	57.8	-151.462	57.8	-106.539	57.9	-63.625
57.9	2120.74	58.1	2195.74	57.9	1903.5	58.1	1064.06	58	29.6258	57.9	-151.553	57.9	-106.699	58	-63.7344
58	2121.04	58.2	2196.21	58	1904.52	58.2	1067.84	58.1	30.939	58	-151.674	58	-106.874	58.1	-63.8469
58.1	2121.33	58.3	2196.66	58.1	1905.53	58.3	1071.65	58.2	32.2593	58.1	-151.774	58.1	-107.073	58.2	-63.9648
58.2	2121.65	58.4	2197.09	58.2	1906.54	58.4	1075.42	58.3	33.5875	58.2	-151.846	58.2	-107.273	58.3	-64.0477
58.3	2121.98	58.5	2197.5	58.3	1907.57	58.5	1079.2	58.4	34.9195	58.3	-151.912	58.3	-107.462	58.4	-64.1859
58.4	2122.27	58.6	2197.9	58.4	1908.58	58.6	1083.03	58.5	36.2719	58.4	-151.985	58.4	-107.639	58.5	-64.3203
58.5	2122.57	58.7	2198.31	58.5	1909.55	58.7	1086.82	58.6	37.6351	58.5	-152.065	58.5	-107.825	58.6	-64.4383
58.6	2122.86	58.8	2198.76	58.6	1910.5	58.8	1090.45	58.7	38.9703	58.6	-152.123	58.6	-108.015	58.7	-64.55
58.7	2123.19	58.9	2199.14	58.7	1911.49	58.9	1094.16	58.8	40.3179	58.7	-152.157	58.7	-108.21	58.8	-64.6516
58.8	2123.52	59	2199.55	58.8	1912.47	59	1097.87	58.9	41.6937	58.8	-152.22	58.8	-108.406	58.9	-64.7586
58.9	2123.83	59.1	2199.94	58.9	1913.41	59.1	1101.48	59	43.0875	58.9	-152.276	58.9	-108.612	59	-64.875
59	2124.15	59.2	2200.37	59	1914.34	59.2	1105.12	59.1	44.4742	59	-152.329	59	-108.816	59.1	-64.9906
59.1	2124.49	59.3	2200.79	59.1	1915.29	59.3	1108.77	59.2	45.8695	59.1	-152.358	59.1	-109	59.2	-65.1133
59.2	2124.83	59.4	2201.2	59.2	1916.22	59.4	1112.38	59.3	47.2554	59.2	-152.399	59.2	-109.155	59.3	-65.2078
59.3	2125.21	59.5	2201.63	59.3	1917.16	59.5	1115.96	59.4	48.6555	59.3	-152.435	59.3	-109.32	59.4	-65.3242
59.4	2125.57	59.6	2202.06	59.4	1918.1	59.6	1119.55	59.5	50.0562	59.4	-152.482	59.4	-109.495	59.5	-65.4094
59.5	2125.94	59.7	2202.48	59.5	1919.01	59.7	1123.16	59.6	51.4742	59.5	-152.559	59.5	-109.699	59.6	-65.5039
59.6	2126.32	59.8	2202.94	59.6	1919.93	59.8	1126.72	59.7	52.889	59.6	-152.611	59.6	-109.874	59.7	-65.6133
59.7	2126.71	59.9	2203.36	59.7	1920.9	59.9	1130.36	59.8	54.3117	59.7	-152.693	59.7	-110.051	59.8	-65.7227
59.8	2127.08	60	2203.8	59.8	1921.78	60	1133.94	59.9	55.7554	59.8	-152.759	59.8	-110.241	59.9	-65.832
59.9	2127.42	60.1	2204.21	59.9	1922.66	60.1	1137.26	60	57.1781	59.9	-152.802	59.9	-110.398	60	-65.9648
60	2127.79	60.2	2204.64	60	1923.54	60.2	1140.75	60.1	58.5961	60	-152.861	60	-110.566	60.1	-66.0617
60.1	2128.15	60.3	2205.06	60.1	1924.42	60.3	1144.21	60.2	60.0422	60.1	-152.943	60.1	-110.75	60.2	-66.1594
60.2	2128.54	60.4	2205.48	60.2	1925.31	60.4	1147.68	60.3	61.5297	60.2	-152.989	60.2	-110.94	60.3	-66.2664
60.3	2128.93	60.5	2205.9	60.3	1926.18	60.5	1151.15	60.4	63.0695	60.3	-153.041	60.3	-111.109	60.4	-66.393
60.4	2129.27	60.6	2206.34	60.4	1927.06	60.6	1154.67	60.5	64.5977	60.4	-153.115	60.4	-111.292	60.5	-66.5086
60.5	2129.64	60.7	2206.79	60.5	1927.93	60.7	1158.09	60.6	66.1508	60.5	-153.149	60.5	-111.48	60.6	-66.6476
60.6	2129.99	60.8	2207.24	60.6	1928.8	60.8	1161.47	60.7	67.6797	60.6	-153.166	60.6	-111.655	60.7	-66.7461
60.7	2130.35	60.9	2207.69	60.7	1929.67	60.9	1164.85	60.8	69.2007	60.7	-153.18	60.7	-111.843	60.8	-66.8391
60.8	2130.72	61	2208.02	60.8	1930.55	61	1168.28	60.9	70.6914	60.8	-153.185	60.8	-112.042	60.9	-66.9531
60.9	2131.07	61.1	2208.44	60.9	1931.41	61.1	1171.66	61	72.2375	60.9	-153.224	60.9	-112.199	61	-67.0695
61	2131.46	61.2	2208.86	61	1932.27	61.2	1175.07	61.1	73.7719	61	-153.255	61	-112.371	61.1	-67.1719
61.1	2131.83	61.3	2209.28	61.1	1933.1	61.3	1178.46	61.2	75.3156	61.1	-153.302	61.1	-112.566	61.2	-67.2969
61.2	2132.2	61.4	2209.72	61.2	1933.95	61.4	1181.98	61.3	76.8625	61.2	-153.318	61.2	-112.73	61.3	-67.3898
61.3	2132.54	61.5	2210.17	61.3	1934.79	61.5	1185.01	61.4	78.4445	61.3	-153.336	61.3	-112.901	61.4	-67.5039
61.4	2132.89	61.6	2210.58	61.4	1935.6	61.6	1188.2	61.5	80.0156	61.4	-153.321	61.4	-113.078	61.5	-67.5938
61.5	2133.23	61.7	2211.04	61.5	1936.45	61.7	1191.42	61.6	81.6203	61.5	-153.334	61.5	-113.257	61.6	-67.7031
61.6	2133.61	61.8	2211.48	61.6	1937.27	61.8	1194.66	61.7	83.1859	61.6	-153.36	61.6	-113.41	61.7	-67.8
61.7	2133.96	61.9	2211.9	61.7	1938.05	61.9	1197.88	61.8	84.7539	61.7	-153.381	61.7	-113.577	61.8	-67.9172
61.8	2134.3	62	2212.3	61.8	1938.86	62	1201.09	61.9	86.3047	61.8	-153.367	61.8	-113.741	61.9	-68.043
61.9	2134.66	62.1	2212.71	61.9	1939.69	62.1	1204.32	62	87.9094	61.9	-153.352	61.9	-113.91	62	-68.1523
62	2135.01	62.2	2213.03	62	1940.51	62.2	1207.57	62.1	89.4992	62	-153.318	62	-114.097	62.1	-68.2656
62.1	2135.35	62.3	2213.38	62.1	1941.32	62.3	1210.73	62.2	91.1211	62.1	-153.313	62.1	-114.27	62.2	-68.3906
62.2	2135.69	62.4	2213.78	62.2	1942.12	62.4	1213.89	62.3	92.7422	62.2	-153.286	62.2	-114.452	62.3	-68.5039
62.3	2136.02	62.5	2214.18	62.3	1942.89	62.5	1216.97	62.4	94.3789	62.3	-153.255	62.3	-114.633	62.4	-68.6476
62.4	2136.32	62.6	2214.56	62.4	1943.7	62.6	1220.06	62.5	96.0039	62.4	-153.223	62.4	-114.801	62.5	-68.7352
62.5	2136.62	62.7	2214.93	62.5	1944.53	62.7	1223.15	62.6	97.6328	62.5	-153.223	62.5	-114.995	62.6	-68.8508
62.6	2136.94	62.8	2215.31	62.6	1945.26	62.8	1226.24	62.7	99.2734	62.6	-153.204	62.6	-115.18	62.7	-68.9531
62.7	2137.26	62.9	2215.69	62.7	1945.96	62.9	1229.32	62.8	100.93	62.7	-153.168	62.7	-115.381	62.8	-69.0742
62.8	2137.57	63	2216.08	62.8	1946.72	63	1232.38	62.9	102.59	62.8	-153.143	62.8	-115.559	62.9	-69.1914
62.9	2137.87	63.1	2216.45	62.9	1947.47	63.1	1235.43	63	104.27	62.9	-153.145	62.9	-115.737	63	-69.3164
63	2138.18	63.2	2216.78	63	1948.19	63.2	1238.47	63.1	105.942	63	-153.134	63	-115.913	63.1	-69.4289
63.1	2138.5	63.3	2217.12	63.1	1948.9	63.3	1241.54	63.2	107.632	63.1	-153.121	63.1	-116.102	63.2	-69.5469
63.2	2138.83	63.4	2217.48	63.2	1949.62	63.4	1244.58	63.3	109.313	63.2	-153.099	63.2	-116.268	63.3	-69.6203
63.3	2139.15	63.5	2217.84	63.3	1950.35	63.5	1247.59	63.4	110.981	63.3	-153.063	63.3	-116.422	63.4	-69.7305
63.4	2139.46	63.6	2218.17	63.4	1951.1	63.6	1250.54	63.5	112.695	63.4	-153.068	63.4	-116.577	63.5	-69.8469
63.5	2139.8	63.7	2218.53	63.5	1951.83	63.7	1253.48	63.6	114.383	63.5	-153.075	63.5	-116.737	63.6	-69.9727
63.6	2140.16	63.8	2218.88	63.6	1952.57	63.8	1256.42	63.7	116.103	63.6	-153.051	63.6	-116.882	63.7	-70.0938
63.7	2140.48	63.9	2219.26	63.7	1953.31	63.9	1259.17	63.8	117.824	63.7	-153.036	63.7	-117.063	63.8	-70.2031
63.8	2140.79	64	2219.61	63.8	1954.01	64	1262.04	63.9	119.552	63.8	-153.044	63.8	-117.215	63.9	-70.2883
63.9	2141.1	64.1	2219.98	63.9	1954.74	64.1	1264.91	64	121.298	63.9	-153.02	63.9	-117.37	64	-70.4063
64	2141.41	64.2	2220.35	64	1955.44	64.2	1267.78	64.1	123.051	64	-152.985	64	-117.543	64.1	-70.4641
64.1	2141.69	64.3	2220.72	64.1	1956.17	64.3	1270.67	64.2	124.813	64.1	-152.973	64.1	-117.706	64.2	-70.5273
64.2	2141.98	64.4	2221.09	64.2	1956.89	64.4	1273.54	64.3	126.584	64.2	-152.954	64.2	-117.871	64.3	-70.625
64.3	2142.27	64.5	2221.44	64.3	1957.59	64.5	1276.31	64.4	128.352	64.3	-152.927	64.3	-118.034	64.4	-70.7367
64.4	2142.55	64.6	2221.84	64.4	1958.3	64.6	1279.08	64.5	130.134	64.4	-152.895	64.4	-118.215	64.5	-70.8312
64.5	2142.84	64.7	2222.21	64.5	1958.99	64.7	1281.87	64.6	131.9	64.5	-152.837	64.5	-118.373	64.6	-70.9227
64.6	2143.11	64.8	2222.57	64.6	1959.65	64.8	1284.6	64.7	133.689	64.6	-152.781	64.6	-118.515	64.7	-71.0031
64.7	2143.4	64.9	2222.94	64.7	1960.33	64.9	1287.33	64.8	135.449	64.7	-152.708	64.7	-118.679	64.8	-71.1008
64.8	2143.69	65	2223.29	64.8	1960.96	65	1290.08	64.9	137.245	64.8	-152.638	64.8	-118.847	64.9	-71.218
64.9	2143.97	65.1	2223.68	64.9	1961.64	65.1	1292.84	65	139.02	64.9	-152.57	64.9	-119.015	65	-71.3438
65	2144.23	65.2	2224.03	65	1962.3	65.2	1295.57	65.1	140.798	65	-152.523	65	-119.187	65.1	-71.4727
65.1	2144.51	65.3	2224.4	65.1	1962.96	65.3	1298.25	65.2	142.579	65.1	-152.462	65.1	-119.327	65.2	-71.6055
65.2	2144.84	65.4	2224.78	65.2	1963.6	65.4	1300.91	65.3	144.396	65.2	-152.414	65.2	-119.5	65.3	-71.7219
65.3	2145.13	65.5	2225.16	65.3	1964.26	65.5	1303.57	65.4	146.221	65.3	-152.348	65.3	-119.643	65.4	-71.832
65.4	2145.39	65.6	2225.52	65.4	1964.93	65.6	1306.26	65.5	148.052	65.4	-152.281	65.4	-119.745	65.5	-71.9453
65.5	2145.68	65.7	2225.89	65.5	1965.58	65.7	1308.87	65.6	149.892	65.5	-152.211	65.5	-119.871	65.6	-72.0258
65.6	2145.97	65.8	2226.28	65.6	1966.25	65.8	1311.49	65.7	151.739	65.6	-152.15	65.6	-120.012	65.7	-72.118
65.7	2146.26	65.9	2226.62	65.7	1966.91	65.9	1314.15	65.8	153.588	65.7	-152.118	65.7	-120.143	65.8	-72.2297
65.8	2146.54	66	2226.99	65.8	1967.59	66	1316.76	65.9	155.477	65.8	-152.067	65.8	-120.288	65.9	-72.3242
65.9	2146.81	66.1	2227.33	65.9	1968.23	66.1	1319.27	66	157.342	65.9	-152.019	65.9	-120.398	66	-72.4336
66	2147.11	66.2	2227.67	66	1968.84	66.2	1321.75	66.1	159.245	66	-151.958	66	-120.523	66.1	-72.5156
66.1	2147.4	66.3	2228.01	66.1	1969.49	66.3	1324.27	66.2	161.143	66.1	-151.895	66.1	-120.631	66.2	-72.6078
66.2	2147.69	66.4	2228.36	66.2	1970.14	66.4	1326.81	66.3	163.021	66.2	-151.816	66.2	-120.757	66.3	-72.7031
66.3	2147.97	66.5	2228.71	66.3	1970.73	66.5	1329.28	66.4	164.896	66.3	-151.715	66.3	-120.875	66.4	-72.8172
66.4	2148.24	66.6	2229.07	66.4	1971.35	66.6	1331.75	66.5	166.811	66.4	-151.634	66.4	-121.002	66.5	-72.9328
66.5	2148.54	66.7	2229.4	66.5	1971.94	66.7	1334.19	66.6	168.702	66.5	-151.542	66.5	-121.18	66.6	-73.0187
66.6	2148.83	66.8	2229.68	66.6	1972.55	66.8	1336.63	66.7	170.616	66.6	-151.477	66.6	-121.445	66.7	-73.125
66.7	2149.11	66.9	2230.03	66.7	1973.16	66.9	1339.08	66.8	172.541	66.7	-151.388	66.7	-121.644	66.8	-73.2375
66.8	2149.4	67	2230.35	66.8	1973.77	67	1341.53	66.9	174.474	66.8	-151.316	66.8	-121.82	66.9	-73.3516
66.9	2149.67	67.1	2230.69	66.9	1974.39	67.1	1343.94	67	176.389	66.9	-151.243	66.9	-122.014	67	-73.4648
67	2149.93	67.2	2231.04	67	1975.01	67.2	1346.36	67.1	178.311	67	-151.171	67	-122.198	67.1	-73.5617
67.1	2150.17	67.3	2231.38	67.1	1975.6	67.3	1348.73	67.2	180.245	67.1	-151.098	67.1	-122.405	67.2	-73.6719
67.2	2150.42	67.4	2231.71	67.2	1976.21	67.4	1351.1	67.3	182.173	67.2	-151.016	67.2	-122.57	67.3	-73.7961
67.3	2150.66	67.5	2232.05	67.3	1976.81	67.5	1353.51	67.4	184.108	67.3	-150.926	67.3	-122.723	67.4	-73.9141
67.4	2150.9	67.6	2232.4	67.4	1977.41	67.6	1355.83	67.5	186.054	67.4	-150.844	67.4	-122.866	67.5	-73.9914
67.5	2151.15	67.7	2232.7	67.5	1977.99	67.7	1358.12	67.6	187.998	67.5	-150.77	67.5	-123.022	67.6	-74.082
67.6	2151.41	67.8	2233.07	67.6	1978.61	67.8	1360.43	67.7	189.948	67.6	-150.695	67.6	-123.179	67.7	-74.2148
67.7	2151.65	67.9	2233.42	67.7	1979.2	67.9	1362.71	67.8	191.89	67.7	-150.622	67.7	-123.32	67.8	-74.3555
67.8	2151.87	68	2233.75	67.8	1979.79	68	1364.96	67.9	193.834	67.8	-150.562	67.8	-123.445	67.9	-74.4672
67.9	2152.12	68.1	2234.09	67.9	1980.35	68.1	1367.23	68	195.78	67.9	-150.453	67.9	-123.592	68	-74.5547
68	2152.39	68.2	2234.4	68	1980.9	68.2	1369.42	68.1	197.749	68	-150.345	68	-123.734	68.1	-74.6398
68.1	2152.64	68.3	2234.75	68.1	1981.44	68.3	1371.65	68.2	199.718	68.1	-150.238	68.1	-123.886	68.2	-74.7344
68.2	2152.94	68.4	2235.08	68.2	1982.03	68.4	1373.9	68.3	201.73	68.2	-150.132	68.2	-124.059	68.3	-74.8242
68.3	2153.22	68.5	2235.42	68.3	1982.63	68.5	1376.07	68.4	203.713	68.3	-150.047	68.3	-124.245	68.4	-74.9133
68.4	2153.5	68.6	2235.73	68.4	1983.2	68.6	1378.22	68.5	205.711	68.4	-149.911	68.4	-124.394	68.5	-75.0039
68.5	2153.76	68.7	2236.07	68.5	1983.74	68.7	1380.39	68.6	207.719	68.5	-149.804	68.5	-124.551	68.6	-75.1086
68.6	2154.02	68.8	2236.39	68.6	1984.3	68.8	1382.54	68.7	209.726	68.6	-149.703	68.6	-124.706	68.7	-75.207
68.7	2154.3	68.9	2236.68	68.7	1984.86	68.9	1384.65	68.8	211.765	68.7	-149.559	68.7	-124.855	68.8	-75.3
68.8	2154.57	69	2236.99	68.8	1985.4	69	1386.79	68.9	213.792	68.8	-149.469	68.8	-125.023	68.9	-75.3555
68.9	2154.83	69.1	2237.3	68.9	1985.96	69.1	1388.94	69	215.835	68.9	-149.335	68.9	-125.179	69	-75.4406
69	2155.1	69.2	2237.63	69	1986.5	69.2	1391.04	69.1	217.872	69	-149.216	69	-125.342	69.1	-75.5469
69.1	2155.36	69.3	2237.96	69.1	1987.05	69.3	1393.17	69.2	219.909	69.1	-149.085	69.1	-125.48	69.2	-75.632
69.2	2155.6	69.4	2238.26	69.2	1987.6	69.4	1395.3	69.3	221.923	69.2	-148.972	69.2	-125.621	69.3	-75.7148
69.3	2155.84	69.5	2238.61	69.3	1988.14	69.5	1397.4	69.4	223.977	69.3	-148.856	69.3	-125.776	69.4	-75.8164
69.4	2156.07	69.6	2238.93	69.4	1988.65	69.6	1399.52	69.5	226.05	69.4	-148.765	69.4	-125.914	69.5	-75.9016
69.5	2156.3	69.7	2239.26	69.5	1989.18	69.7	1401.65	69.6	228.105	69.5	-148.616	69.5	-126.058	69.6	-75.9836
69.6	2156.57	69.8	2239.57	69.6	1989.71	69.8	1403.61	69.7	230.171	69.6	-148.469	69.6	-126.213	69.7	-76.0695
69.7	2156.84	69.9	2239.93	69.7	1990.23	69.9	1405.65	69.8	232.247	69.7	-148.324	69.7	-126.355	69.8	-76.1563
69.8	2157.09	70	2240.28	69.8	1990.76	70	1407.53	69.9	234.332	69.8	-148.179	69.8	-126.511	69.9	-76.2414
69.9	2157.35	70.1	2240.6	69.9	1991.27	70.1	1409.57	70	236.438	69.9	-148.027	69.9	-126.655	70	-76.3312
70	2157.64	70.2	2240.93	70	1991.78	70.2	1411.53	70.1	238.516	70	-147.894	70	-126.769	70.1	-76.4023
70.1	2157.91	70.3	2241.23	70.1	1992.32	70.3	1413.53	70.2	240.633	70.1	-147.77	70.1	-126.909	70.2	-76.507
70.2	2158.18	70.4	2241.54	70.2	1992.82	70.4	1415.48	70.3	242.75	70.2	-147.648	70.2	-127.058	70.3	-76.618
70.3	2158.44	70.5	2241.84	70.3	1993.35	70.5	1417.47	70.4	244.888	70.3	-147.492	70.3	-127.198	70.4	-76.7461
70.4	2158.71	70.6	2242.12	70.4	1993.85	70.6	1419.4	70.5	247.004	70.4	-147.32	70.4	-127.334	70.5	-76.8508
70.5	2158.98	70.7	2242.46	70.5	1994.37	70.7	1421.3	70.6	249.114	70.5	-147.188	70.5	-127.456	70.6	-76.9406
70.6	2159.26	70.8	2242.76	70.6	1994.9	70.8	1423.2	70.7	251.262	70.6	-147.078	70.6	-127.609	70.7	-77.043
70.7	2159.52	70.9	2243.05	70.7	1995.43	70.9	1425.14	70.8	253.391	70.7	-146.921	70.7	-127.742	70.8	-77.1563
70.8	2159.76	71	2243.35	70.8	1995.93	71	1427	70.9	255.532	70.8	-146.741	70.8	-127.88	70.9	-77.2656
70.9	2160	71.1	2243.66	70.9	1996.42	71.1	1428.87	71	257.676	70.9	-146.586	70.9	-128.027	71	-77.3898
71	2160.25	71.2	2243.95	71	1996.91	71.2	1430.75	71.1	259.818	71	-146.441	71	-128.152	71.1	-77.5234
71.1	2160.48	71.3	2244.24	71.1	1997.4	71.3	1432.62	71.2	261.965	71.1	-146.284	71.1	-128.303	71.2	-77.6352
71.2	2160.7	71.4	2244.53	71.2	1997.9	71.4	1434.48	71.3	264.095	71.2	-146.153	71.2	-128.422	71.3	-77.7344
71.3	2160.93	71.5	2244.8	71.3	1998.44	71.5	1436.26	71.4	266.215	71.3	-145.987	71.3	-128.55	71.4	-77.8242
71.4	2161.15	71.6	2245.09	71.4	1998.92	71.6	1438.06	71.5	268.377	71.4	-145.817	71.4	-128.691	71.5	-77.9258
71.5	2161.39	71.7	2245.35	71.5	1999.44	71.7	1439.84	71.6	270.535	71.5	-145.659	71.5	-128.839	71.6	-78.0305
71.6	2161.63	71.8	2245.61	71.6	1999.91	71.8	1441.58	71.7	272.677	71.6	-145.491	71.6	-129.002	71.7	-78.1594
71.7	2161.87	71.9	2245.89	71.7	2000.4	71.9	1443.33	71.8	274.826	71.7	-145.307	71.7	-129.148	71.8	-78.2656
71.8	2162.13	72	2246.16	71.8	2000.88	72	1445.05	71.9	276.97	71.8	-145.138	71.8	-129.277	71.9	-78.375
71.9	2162.37	72.1	2246.43	71.9	2001.38	72.1	1446.8	72	279.138	71.9	-144.968	71.9	-129.43	72	-78.4836
72	2162.62	72.2	2246.68	72	2001.88	72.2	1448.52	72.1	281.314	72	-144.803	72	-129.55	72.1	-78.5664
72.1	2162.88	72.3	2246.95	72.1	2002.4	72.3	1450.27	72.2	283.47	72.1	-144.641	72.1	-129.667	72.2	-78.6594
72.2	2163.15	72.4	2247.22	72.2	2002.87	72.4	1452	72.3	285.645	72.2	-144.507	72.2	-129.82	72.3	-78.7656
72.3	2163.41	72.5	2247.54	72.3	2003.35	72.5	1453.69	72.4	287.841	72.3	-144.335	72.3	-129.975	72.4	-78.8703
72.4	2163.68	72.6	2247.84	72.4	2003.79	72.6	1455.42	72.5	290.041	72.4	-144.191	72.4	-130.133	72.5	-78.957
72.5	2163.95	72.7	2248.15	72.5	2004.27	72.7	1457.12	72.6	292.227	72.5	-144.038	72.5	-130.284	72.6	-79.0422
72.6	2164.21	72.8	2248.42	72.6	2004.73	72.8	1458.83	72.7	294.395	72.6	-143.878	72.6	-130.39	72.7	-79.1476
72.7	2164.49	72.9	2248.7	72.7	2005.19	72.9	1460.51	72.8	296.6	72.7	-143.723	72.7	-130.519	72.8	-79.2266
72.8	2164.74	73	2248.98	72.8	2005.63	73	1462.21	72.9	298.845	72.8	-143.582	72.8	-130.684	72.9	-79.3047
72.9	2165	73.1	2249.28	72.9	2006.08	73.1	1463.89	73	301.087	72.9	-143.421	72.9	-130.834	73	-79.4016
73	2165.27	73.2	2249.57	73	2006.52	73.2	1465.51	73.1	303.287	73	-143.264	73	-130.975	73.1	-79.4914
73.1	2165.53	73.3	2249.89	73.1	2006.97	73.3	1467.15	73.2	305.505	73.1	-143.118	73.1	-131.137	73.2	-79.5891
73.2	2165.8	73.4	2250.17	73.2	2007.42	73.4	1468.76	73.3	307.744	73.2	-142.983	73.2	-131.295	73.3	-79.668
73.3	2166.03	73.5	2250.45	73.3	2007.9	73.5	1470.35	73.4	309.935	73.3	-142.785	73.3	-131.426	73.4	-79.7492
73.4	2166.27	73.6	2250.7	73.4	2008.37	73.6	1471.96	73.5	312.12	73.4	-142.609	73.4	-131.565	73.5	-79.8484
73.5	2166.51	73.7	2250.98	73.5	2008.82	73.7	1473.57	73.6	314.334	73.5	-142.429	73.5	-131.691	73.6	-79.9633
73.6	2166.75	73.8	2251.25	73.6	2009.3	73.8	1475.1	73.7	316.552	73.6	-142.257	73.6	-131.827	73.7	-80.0742
73.7	2166.98	73.9	2251.52	73.7	2009.78	73.9	1476.63	73.8	318.787	73.7	-142.094	73.7	-131.999	73.8	-80.1641
73.8	2167.21	74	2251.83	73.8	2010.28	74	1478.21	73.9	321.013	73.8	-141.917	73.8	-132.135	73.9	-80.2492
73.9	2167.47	74.1	2252.1	73.9	2010.75	74.1	1479.78	74	323.217	73.9	-141.769	73.9	-132.269	74	-80.3477
74	2167.68	74.2	2252.39	74	2011.21	74.2	1481.35	74.1	325.436	74	-141.613	74	-132.385	74.1	-80.4289
74.1	2167.9	74.3	2252.7	74.1	2011.68	74.3	1482.93	74.2	327.659	74.1	-141.46	74.1	-132.499	74.2	-80.5273
74.2	2168.11	74.4	2252.98	74.2	2012.14	74.4	1484.47	74.3	329.9	74.2	-141.295	74.2	-132.636	74.3	-80.6273
74.3	2168.35	74.5	2253.27	74.3	2012.57	74.5	1486.01	74.4	332.174	74.3	-141.116	74.3	-132.766	74.4	-80.6758
74.4	2168.57	74.6	2253.55	74.4	2013	74.6	1487.59	74.5	334.429	74.4	-140.965	74.4	-132.913	74.5	-80.7773
74.5	2168.82	74.7	2253.88	74.5	2013.45	74.7	1489.18	74.6	336.689	74.5	-140.8	74.5	-133.045	74.6	-80.843
74.6	2169.05	74.8	2254.17	74.6	2013.89	74.8	1490.59	74.7	338.941	74.6	-140.644	74.6	-133.194	74.7	-80.9133
74.7	2169.29	74.9	2254.46	74.7	2014.31	74.9	1492.03	74.8	341.197	74.7	-140.475	74.7	-133.339	74.8	-80.9992
74.8	2169.55	75	2254.75	74.8	2014.72	75	1493.47	74.9	343.463	74.8	-140.297	74.8	-133.438	74.9	-81.0742
74.9	2169.79	75.1	2255.03	74.9	2015.15	75.1	1494.92	75	345.705	74.9	-140.124	74.9	-133.55	75	-81.1711
75	2170	75.2	2255.32	75	2015.61	75.2	1496.32	75.1	347.956	75	-139.936	75	-133.659	75.1	-81.2617
75.1	2170.24	75.3	2255.61	75.1	2016.06	75.3	1497.72	75.2	350.225	75.1	-139.75	75.1	-133.8	75.2	-81.3594
75.2	2170.48	75.4	2255.88	75.2	2016.51	75.4	1499.14	75.3	352.483	75.2	-139.549	75.2	-133.944	75.3	-81.4445
75.3	2170.7	75.5	2256.15	75.3	2016.92	75.5	1500.54	75.4	354.752	75.3	-139.346	75.3	-134.07	75.4	-81.5156
75.4	2170.94	75.6	2256.44	75.4	2017.36	75.6	1501.95	75.5	356.999	75.4	-139.148	75.4	-134.195	75.5	-81.643
75.5	2171.14	75.7	2256.73	75.5	2017.78	75.7	1503.37	75.6	359.248	75.5	-138.94	75.5	-134.327	75.6	-81.7508
75.6	2171.35	75.8	2256.99	75.6	2018.19	75.8	1504.73	75.7	361.495	75.6	-138.737	75.6	-134.452	75.7	-81.843
75.7	2171.56	75.9	2257.27	75.7	2018.63	75.9	1506.11	75.8	363.777	75.7	-138.53	75.7	-134.557	75.8	-81.9211
75.8	2171.74	76	2257.55	75.8	2019.07	76	1507.49	75.9	366.029	75.8	-138.32	75.8	-134.694	75.9	-81.9914
75.9	2171.95	76.1	2257.82	75.9	2019.51	76.1	1508.86	76	368.287	75.9	-138.12	75.9	-134.824	76	-82.0664
76	2172.15	76.2	2258.1	76	2019.94	76.2	1510.25	76.1	370.562	76	-137.933	76	-134.941	76.1	-82.1789
76.1	2172.36	76.3	2258.35	76.1	2020.35	76.3	1511.6	76.2	372.843	76.1	-137.748	76.1	-135.053	76.2	-82.2773
76.2	2172.58	76.4	2258.61	76.2	2020.76	76.4	1512.97	76.3	375.124	76.2	-137.55	76.2	-135.202	76.3	-82.3703
76.3	2172.86	76.5	2258.86	76.3	2021.19	76.5	1514.3	76.4	377.389	76.3	-137.355	76.3	-135.319	76.4	-82.4719
76.4	2173.09	76.6	2259.13	76.4	2021.62	76.6	1515.63	76.5	379.679	76.4	-137.147	76.4	-135.429	76.5	-82.5711
76.5	2173.3	76.7	2259.39	76.5	2022.04	76.7	1516.95	76.6	381.987	76.5	-136.945	76.5	-135.577	76.6	-82.6586
76.6	2173.56	76.8	2259.62	76.6	2022.45	76.8	1518.21	76.7	384.305	76.6	-136.76	76.6	-135.695	76.7	-82.7414
76.7	2173.8	76.9	2259.91	76.7	2022.86	76.9	1519.49	76.8	386.592	76.7	-136.549	76.7	-135.827	76.8	-82.8438
76.8	2174.04	77	2260.21	76.8	2023.27	77	1520.77	76.9	388.902	76.8	-136.362	76.8	-135.983	76.9	-82.957
76.9	2174.28	77.1	2260.48	76.9	2023.67	77.1	1522.04	77	391.195	76.9	-136.136	76.9	-136.117	77	-83.0695
77	2174.53	77.2	2260.74	77	2024.07	77.2	1523.33	77.1	393.511	77	-135.928	77	-136.264	77.1	-83.1828
77.1	2174.76	77.3	2261.01	77.1	2024.47	77.3	1524.59	77.2	395.795	77.1	-135.69	77.1	-136.434	77.2	-83.2687
77.2	2175.01	77.4	2261.29	77.2	2024.87	77.4	1525.84	77.3	398.09	77.2	-135.473	77.2	-136.596	77.3	-83.3828
77.3	2175.21	77.5	2261.55	77.3	2025.27	77.5	1527.09	77.4	400.375	77.3	-135.287	77.3	-136.73	77.4	-83.4844
77.4	2175.45	77.6	2261.84	77.4	2025.64	77.6	1528.35	77.5	402.667	77.4	-135.092	77.4	-136.886	77.5	-83.582
77.5	2175.69	77.7	2262.09	77.5	2026.02	77.7	1529.64	77.6	404.948	77.5	-134.886	77.5	-137.05	77.6	-83.6828
77.6	2175.93	77.8	2262.37	77.6	2026.4	77.8	1530.87	77.7	407.226	77.6	-134.698	77.6	-137.191	77.7	-83.7609
77.7	2176.19	77.9	2262.64	77.7	2026.78	77.9	1532.12	77.8	409.504	77.7	-134.495	77.7	-137.315	77.8	-83.8633
77.8	2176.43	78	2262.9	77.8	2027.16	78	1533.35	77.9	411.769	77.8	-134.304	77.8	-137.436	77.9	-83.9601
77.9	2176.71	78.1	2263.18	77.9	2027.57	78.1	1534.57	78	414.027	77.9	-134.105	77.9	-137.547	78	-84.0547
78	2176.95	78.2	2263.48	78	2027.95	78.2	1535.79	78.1	416.345	78	-133.92	78	-137.678	78.1	-84.1563
78.1	2177.16	78.3	2263.62	78.1	2028.31	78.3	1537	78.2	418.604	78.1	-133.709	78.1	-137.792	78.2	-84.2563
78.2	2177.4	78.4	2263.78	78.2	2028.66	78.4	1538.23	78.3	420.855	78.2	-133.52	78.2	-137.897	78.3	-84.3281
78.3	2177.63	78.5	2263.95	78.3	2029.07	78.5	1539.45	78.4	423.165	78.3	-133.318	78.3	-138.011	78.4	-84.4016
78.4	2177.88	78.6	2264.07	78.4	2029.49	78.6	1540.64	78.5	425.461	78.4	-133.08	78.4	-138.123	78.5	-84.4891
78.5	2178.1	78.7	2264.49	78.5	2029.95	78.7	1541.86	78.6	427.748	78.5	-132.851	78.5	-138.234	78.6	-84.6156
78.6	2178.34	78.8	2264.75	78.6	2030.25	78.8	1543.12	78.7	430.028	78.6	-132.648	78.6	-138.359	78.7	-84.7101
78.7	2178.57	78.9	2265.04	78.7	2030.52	78.9	1544.24	78.8	432.355	78.7	-132.413	78.7	-138.503	78.8	-84.8438
78.8	2178.78	79	2265.29	78.8	2030.85	79	1545.32	78.9	434.661	78.8	-132.19	78.8	-138.647	78.9	-84.9375
78.9	2179.02	79.1	2265.55	78.9	2031.19	79.1	1546.35	79	436.949	78.9	-131.987	78.9	-138.773	79	-85.0375
79	2179.23	79.2	2265.78	79	2031.6	79.2	1547.51	79.1	439.238	79	-131.767	79	-138.913	79.1	-85.132
79.1	2179.45	79.3	2266.01	79.1	2031.97	79.3	1548.67	79.2	441.508	79.1	-131.534	79.1	-139.041	79.2	-85.2313
79.2	2179.69	79.4	2266.23	79.2	2032.35	79.4	1549.82	79.3	443.792	79.2	-131.327	79.2	-139.176	79.3	-85.3266
79.3	2179.91	79.5	2266.47	79.3	2032.72	79.5	1550.93	79.4	446.098	79.3	-131.087	79.3	-139.319	79.4	-85.4227
79.4	2180.14	79.6	2266.7	79.4	2033.09	79.6	1552.04	79.5	448.406	79.4	-130.87	79.4	-139.432	79.5	-85.5148
79.5	2180.36	79.7	2266.9	79.5	2033.47	79.7	1553.14	79.6	450.695	79.5	-130.655	79.5	-139.57	79.6	-85.6
79.6	2180.55	79.8	2267.11	79.6	2033.83	79.8	1554.23	79.7	452.977	79.6	-130.432	79.6	-139.707	79.7	-85.6594
79.7	2180.72	79.9	2267.34	79.7	2034.21	79.9	1555.3	79.8	455.259	79.7	-130.23	79.7	-139.838	79.8	-85.743
79.8	2180.93	80	2267.58	79.8	2034.59	80	1556.36	79.9	457.552	79.8	-129.963	79.8	-139.948	79.9	-85.8039
79.9	2181.13	80.1	2267.81	79.9	2034.97	80.1	1557.41	80	459.843	79.9	-129.721	79.9	-140.062	80	-85.8969
80	2181.3	80.2	2268.07	80	2035.36	80.2	1558.49	80.1	462.13	80	-129.475	80	-140.195	80.1	-85.9844
80.1	2181.52	80.3	2268.32	80.1	2035.74	80.3	1559.5	80.2	464.441	80.1	-129.257	80.1	-140.307	80.2	-86.0938
80.2	2181.71	80.4	2268.58	80.2	2036.13	80.4	1560.53	80.3	466.747	80.2	-129.06	80.2	-140.448	80.3	-86.2148
80.3	2181.91	80.5	2268.82	80.3	2036.5	80.5	1561.59	80.4	469.063	80.3	-128.823	80.3	-140.573	80.4	-86.3312
80.4	2182.11	80.6	2269.05	80.4	2036.86	80.6	1562.62	80.5	471.356	80.4	-128.585	80.4	-140.686	80.5	-86.4484
80.5	2182.32	80.7	2269.3	80.5	2037.23	80.7	1563.64	80.6	473.665	80.5	-128.361	80.5	-140.799	80.6	-86.5352
80.6	2182.54	80.8	2269.53	80.6	2037.61	80.8	1564.68	80.7	475.992	80.6	-128.14	80.6	-140.902	80.7	-86.6367
80.7	2182.75	80.9	2269.79	80.7	2037.97	80.9	1565.73	80.8	478.274	80.7	-127.92	80.7	-140.995	80.8	-86.7531
80.8	2182.97	81	2270.02	80.8	2038.33	81	1566.82	80.9	480.587	80.8	-127.702	80.8	-141.109	80.9	-86.843
80.9	2183.18	81.1	2270.23	80.9	2038.68	81.1	1567.88	81	482.91	80.9	-127.46	80.9	-141.212	81	-86.9601
81	2183.4	81.2	2270.48	81	2039.03	81.2	1568.88	81.1	485.231	81	-127.209	81	-141.343	81.1	-87.0547
81.1	2183.61	81.3	2270.72	81.1	2039.38	81.3	1569.88	81.2	487.54	81.1	-126.971	81.1	-141.448	81.2	-87.1398
81.2	2183.84	81.4	2270.94	81.2	2039.74	81.4	1570.91	81.3	489.841	81.2	-126.718	81.2	-141.558	81.3	-87.1945
81.3	2184.05	81.5	2271.17	81.3	2040.11	81.5	1571.95	81.4	492.145	81.3	-126.487	81.3	-141.639	81.4	-87.2531
81.4	2184.25	81.6	2271.45	81.4	2040.44	81.6	1572.98	81.5	494.427	81.4	-126.22	81.4	-141.748	81.5	-87.3203
81.5	2184.46	81.7	2271.71	81.5	2040.79	81.7	1573.96	81.6	496.738	81.5	-125.967	81.5	-141.846	81.6	-87.4055
81.6	2184.67	81.8	2271.97	81.6	2041.15	81.8	1574.9	81.7	499.037	81.6	-125.681	81.6	-141.972	81.7	-87.4836
81.7	2184.89	81.9	2272.22	81.7	2041.47	81.9	1575.82	81.8	501.333	81.7	-125.417	81.7	-142.081	81.8	-87.5617
81.8	2185.13	82	2272.48	81.8	2041.83	82	1576.75	81.9	503.666	81.8	-125.182	81.8	-142.182	81.9	-87.6641
81.9	2185.35	82.1	2272.73	81.9	2042.18	82.1	1577.71	82	505.969	81.9	-124.955	81.9	-142.284	82	-87.7383
82	2185.59	82.2	2273	82	2042.52	82.2	1578.67	82.1	508.24	82	-124.725	82	-142.384	82.1	-87.8469
82.1	2185.81	82.3	2273.24	82.1	2042.86	82.3	1579.62	82.2	510.532	82.1	-124.475	82.1	-142.464	82.2	-87.9055
82.2	2186.03	82.4	2273.48	82.2	2043.2	82.4	1580.54	82.3	512.845	82.2	-124.225	82.2	-142.557	82.3	-87.9914
82.3	2186.25	82.5	2273.71	82.3	2043.52	82.5	1581.46	82.4	515.156	82.3	-123.982	82.3	-142.691	82.4	-88.0891
82.4	2186.48	82.6	2273.94	82.4	2043.86	82.6	1582.42	82.5	517.455	82.4	-123.745	82.4	-142.807	82.5	-88.2148
82.5	2186.7	82.7	2274.19	82.5	2044.18	82.7	1583.38	82.6	519.751	82.5	-123.519	82.5	-142.909	82.6	-88.3164
82.6	2186.92	82.8	2274.41	82.6	2044.51	82.8	1584.33	82.7	522.056	82.6	-123.291	82.6	-143.023	82.7	-88.4133
82.7	2187.18	82.9	2274.66	82.7	2044.85	82.9	1585.28	82.8	524.36	82.7	-123.073	82.7	-143.147	82.8	-88.5063
82.8	2187.42	83	2274.91	82.8	2045.17	83	1586.23	82.9	526.646	82.8	-122.846	82.8	-143.256	82.9	-88.5977
82.9	2187.61	83.1	2275.15	82.9	2045.5	83.1	1587.12	83	528.875	82.9	-122.596	82.9	-143.37	83	-88.6992
83	2187.81	83.2	2275.38	83	2045.82	83.2	1588.01	83.1	531.135	83	-122.358	83	-143.484	83.1	-88.807
83.1	2188	83.3	2275.57	83.1	2046.14	83.3	1588.91	83.2	533.438	83.1	-122.111	83.1	-143.588	83.2	-88.9336
83.2	2188.21	83.4	2275.8	83.2	2046.45	83.4	1589.77	83.3	535.732	83.2	-121.866	83.2	-143.717	83.3	-89.0578
83.3	2188.42	83.5	2276.03	83.3	2046.74	83.5	1590.66	83.4	537.994	83.3	-121.63	83.3	-143.843	83.4	-89.1711
83.4	2188.63	83.6	2276.25	83.4	2047.05	83.6	1591.57	83.5	540.271	83.4	-121.393	83.4	-143.952	83.5	-89.2969
83.5	2188.86	83.7	2276.49	83.5	2047.38	83.7	1592.43	83.6	542.555	83.5	-121.155	83.5	-144.045	83.6	-89.3742
83.6	2189.06	83.8	2276.71	83.6	2047.72	83.8	1593.28	83.7	544.861	83.6	-120.892	83.6	-144.152	83.7	-89.4719
83.7	2189.23	83.9	2276.95	83.7	2048.02	83.9	1594.16	83.8	547.162	83.7	-120.652	83.7	-144.265	83.8	-89.5695
83.8	2189.41	84	2277.17	83.8	2048.33	84	1595.02	83.9	549.423	83.8	-120.409	83.8	-144.342	83.9	-89.6609
83.9	2189.62	84.1	2277.46	83.9	2048.63	84.1	1595.93	84	551.706	83.9	-120.169	83.9	-144.459	84	-89.7531
84	2189.85	84.2	2277.65	84	2048.98	84.2	1596.81	84.1	553.977	84	-119.916	84	-144.58	84.1	-89.843
84.1	2190.09	84.3	2277.89	84.1	2049.32	84.3	1597.67	84.2	556.232	84.1	-119.652	84.1	-144.675	84.2	-89.9375
84.2	2190.29	84.4	2278.11	84.2	2049.66	84.4	1598.54	84.3	558.502	84.2	-119.392	84.2	-144.78	84.3	-90.018
84.3	2190.49	84.5	2278.36	84.3	2050.02	84.5	1599.38	84.4	560.732	84.3	-119.123	84.3	-144.905	84.4	-90.1086
84.4	2190.71	84.6	2278.6	84.4	2050.38	84.6	1600.25	84.5	562.994	84.4	-118.841	84.4	-145.025	84.5	-90.2148
84.5	2190.93	84.7	2278.82	84.5	2050.7	84.7	1601.07	84.6	565.247	84.5	-118.577	84.5	-145.144	84.6	-90.2969
84.6	2191.12	84.8	2279.03	84.6	2051.01	84.8	1601.93	84.7	567.498	84.6	-118.302	84.6	-145.277	84.7	-90.375
84.7	2191.35	84.9	2279.25	84.7	2051.31	84.9	1602.75	84.8	569.732	84.7	-118.038	84.7	-145.401	84.8	-90.4914
84.8	2191.54	85	2279.49	84.8	2051.64	85	1603.56	84.9	571.985	84.8	-117.741	84.8	-145.494	84.9	-90.5734
84.9	2191.75	85.1	2279.73	84.9	2051.97	85.1	1604.4	85	574.245	84.9	-117.47	84.9	-145.612	85	-90.668
85	2191.98	85.2	2279.98	85	2052.3	85.2	1605.19	85.1	576.516	85	-117.186	85	-145.714	85.1	-90.7726
85.1	2192.18	85.3	2280.21	85.1	2052.62	85.3	1606	85.2	578.748	85.1	-116.923	85.1	-145.83	85.2	-90.8547
85.2	2192.39	85.4	2280.45	85.2	2052.95	85.4	1606.82	85.3	580.983	85.2	-116.655	85.2	-145.948	85.3	-90.9477
85.3	2192.61	85.5	2280.67	85.3	2053.25	85.5	1607.65	85.4	583.228	85.3	-116.413	85.3	-146.066	85.4	-91.0226
85.4	2192.81	85.6	2280.89	85.4	2053.54	85.6	1608.46	85.5	585.478	85.4	-116.169	85.4	-146.159	85.5	-91.1172
85.5	2193.01	85.7	2281.12	85.5	2053.86	85.7	1609.3	85.6	587.728	85.5	-115.901	85.5	-146.248	85.6	-91.175
85.6	2193.2	85.8	2281.36	85.6	2054.17	85.8	1610.1	85.7	589.963	85.6	-115.623	85.6	-146.343	85.7	-91.2414
85.7	2193.44	85.9	2281.58	85.7	2054.49	85.9	1610.91	85.8	592.213	85.7	-115.37	85.7	-146.432	85.8	-91.3281
85.8	2193.67	86	2281.78	85.8	2054.8	86	1611.71	85.9	594.447	85.8	-115.123	85.8	-146.549	85.9	-91.4164
85.9	2193.89	86.1	2282.02	85.9	2055.1	86.1	1612.49	86	596.682	85.9	-114.838	85.9	-146.647	86	-91.5203
86	2194.11	86.2	2282.21	86	2055.42	86.2	1613.29	86.1	598.927	86	-114.58	86	-146.768	86.1	-91.6125
86.1	2194.29	86.3	2282.39	86.1	2055.71	86.3	1614.11	86.2	601.12	86.1	-114.306	86.1	-146.874	86.2	-91.7094
86.2	2194.5	86.4	2282.59	86.2	2056.01	86.4	1614.84	86.3	603.377	86.2	-114.017	86.2	-146.964	86.3	-91.8039
86.3	2194.69	86.5	2282.81	86.3	2056.29	86.5	1615.57	86.4	605.62	86.3	-113.731	86.3	-147.053	86.4	-91.8625
86.4	2194.88	86.6	2283.01	86.4	2056.58	86.6	1616.31	86.5	607.85	86.4	-113.44	86.4	-147.166	86.5	-91.9648
86.5	2195.08	86.7	2283.21	86.5	2056.9	86.7	1617.03	86.6	610.103	86.5	-113.146	86.5	-147.26	86.6	-92.0664
86.6	2195.3	86.8	2283.4	86.6	2057.21	86.8	1617.79	86.7	612.355	86.6	-112.881	86.6	-147.379	86.7	-92.1781
86.7	2195.47	86.9	2283.61	86.7	2057.49	86.9	1618.54	86.8	614.579	86.7	-112.61	86.7	-147.466	86.8	-92.2813
86.8	2195.65	87	2283.87	86.8	2057.79	87	1619.27	86.9	616.791	86.8	-112.326	86.8	-147.549	86.9	-92.3625
86.9	2195.82	87.1	2284.11	86.9	2058.09	87.1	1620.03	87	619.01	86.9	-112.038	86.9	-147.62	87	-92.4492
87	2196.02	87.2	2284.34	87	2058.38	87.2	1620.75	87.1	621.244	87	-111.787	87	-147.729	87.1	-92.518
87.1	2196.18	87.3	2284.59	87.1	2058.69	87.3	1621.49	87.2	623.491	87.1	-111.498	87.1	-147.819	87.2	-92.6047
87.2	2196.34	87.4	2284.84	87.2	2059.02	87.4	1622.22	87.3	625.702	87.2	-111.205	87.2	-147.925	87.3	-92.6711
87.3	2196.52	87.5	2285.13	87.3	2059.32	87.5	1622.96	87.4	627.912	87.3	-110.92	87.3	-148.027	87.4	-92.7492
87.4	2196.7	87.6	2285.43	87.4	2059.63	87.6	1623.69	87.5	630.105	87.4	-110.627	87.4	-148.107	87.5	-92.8164
87.5	2196.9	87.7	2285.63	87.5	2059.95	87.7	1624.43	87.6	632.309	87.5	-110.323	87.5	-148.194	87.6	-92.8867
87.6	2197.07	87.8	2285.76	87.6	2060.25	87.8	1625.16	87.7	634.498	87.6	-110.013	87.6	-148.369	87.7	-92.9641
87.7	2197.26	87.9	2285.96	87.7	2060.56	87.9	1625.88	87.8	636.675	87.7	-109.702	87.7	-148.413	87.8	-93.0344
87.8	2197.45	88	2286.18	87.8	2060.87	88	1626.57	87.9	638.814	87.8	-109.408	87.8	-148.377	87.9	-93.0851
87.9	2197.66	88.1	2286.37	87.9	2061.15	88.1	1627.26	88	640.987	87.9	-109.122	87.9	-148.386	88	-93.1391
88	2197.86	88.2	2286.56	88	2061.47	88.2	1627.96	88.1	643.186	88	-108.826	88	-148.478	88.1	-93.2188
88.1	2198.03	88.3	2286.76	88.1	2061.79	88.3	1628.66	88.2	645.377	88.1	-108.498	88.1	-148.668	88.2	-93.2961
88.2	2198.25	88.4	2286.95	88.2	2062.07	88.4	1629.34	88.3	647.51	88.2	-108.205	88.2	-148.788	88.3	-93.3789
88.3	2198.45	88.5	2287.16	88.3	2062.36	88.5	1630.02	88.4	649.686	88.3	-107.92	88.3	-148.862	88.4	-93.4906
88.4	2198.64	88.6	2287.38	88.4	2062.62	88.6	1630.7	88.5	651.88	88.4	-107.631	88.4	-148.925	88.5	-93.5781
88.5	2198.86	88.7	2287.57	88.5	2062.92	88.7	1631.39	88.6	654.096	88.5	-107.341	88.5	-149.002	88.6	-93.6945
88.6	2199.04	88.8	2287.78	88.6	2063.2	88.8	1632.09	88.7	656.253	88.6	-107.056	88.6	-149.108	88.7	-93.8039
88.7	2199.22	88.9	2287.99	88.7	2063.49	88.9	1632.76	88.8	658.38	88.7	-106.764	88.7	-149.179	88.8	-93.8937
88.8	2199.43	89	2288.2	88.8	2063.77	89	1633.41	88.9	660.555	88.8	-106.454	88.8	-149.233	88.9	-93.9961
88.9	2199.65	89.1	2288.4	88.9	2064.07	89.1	1634.09	89	662.706	88.9	-106.158	88.9	-149.323	89	-94.1437
89	2199.85	89.2	2288.59	89	2064.35	89.2	1634.78	89.1	664.849	89	-105.857	89	-149.423	89.1	-94.2484
89.1	2200.08	89.3	2288.82	89.1	2064.63	89.3	1635.46	89.2	667.019	89.1	-105.553	89.1	-149.502	89.2	-94.3164
89.2	2200.29	89.4	2289.05	89.2	2064.92	89.4	1636.13	89.3	669.179	89.2	-105.255	89.2	-149.589	89.3	-94.3867
89.3	2200.51	89.5	2289.27	89.3	2065.19	89.5	1636.82	89.4	671.334	89.3	-104.954	89.3	-149.678	89.4	-94.4758
89.4	2200.73	89.6	2289.49	89.4	2065.47	89.6	1637.47	89.5	673.491	89.4	-104.658	89.4	-149.791	89.5	-94.5461
89.5	2200.91	89.7	2289.69	89.5	2065.78	89.7	1638.15	89.6	675.654	89.5	-104.342	89.5	-149.893	89.6	-94.6164
89.6	2201.12	89.8	2289.89	89.6	2066.06	89.8	1638.83	89.7	677.772	89.6	-104.044	89.6	-149.959	89.7	-94.6945
89.7	2201.33	89.9	2290.06	89.7	2066.34	89.9	1639.47	89.8	679.925	89.7	-103.752	89.7	-150.066	89.8	-94.7844
89.8	2201.59	90	2290.27	89.8	2066.6	90	1640.16	89.9	682.089	89.8	-103.462	89.8	-150.134	89.9	-94.8656
89.9	2201.79	90.1	2290.48	89.9	2066.88	90.1	1640.85	90	684.261	89.9	-103.153	89.9	-150.214	90	-94.957
90	2202	90.2	2290.67	90	2067.16	90.2	1641.52	90.1	686.361	90	-102.837	90	-150.306	90.1	-95.0352
90.1	2202.21	90.3	2290.88	90.1	2067.44	90.3	1642.18	90.2	688.409	90.1	-102.514	90.1	-150.386	90.2	-95.1195
90.2	2202.41	90.4	2291.07	90.2	2067.72	90.4	1642.85	90.3	690.502	90.2	-102.2	90.2	-150.462	90.3	-95.2188
90.3	2202.6	90.5	2291.26	90.3	2067.99	90.5	1643.54	90.4	692.612	90.3	-101.908	90.3	-150.541	90.4	-95.3117
90.4	2202.79	90.6	2291.46	90.4	2068.29	90.6	1644.15	90.5	694.706	90.4	-101.575	90.4	-150.604	90.5	-95.4172
90.5	2203	90.7	2291.64	90.5	2068.55	90.7	1644.76	90.6	696.82	90.5	-101.264	90.5	-150.648	90.6	-95.5203
90.6	2203.23	90.8	2291.87	90.6	2068.83	90.8	1645.34	90.7	698.927	90.6	-100.959	90.6	-150.721	90.7	-95.6273
90.7	2203.43	90.9	2292.07	90.7	2069.1	90.9	1645.97	90.8	701.038	90.7	-100.645	90.7	-150.803	90.8	-95.7305
90.8	2203.63	91	2292.29	90.8	2069.36	91	1646.58	90.9	703.131	90.8	-100.315	90.8	-150.877	90.9	-95.7914
90.9	2203.81	91.1	2292.51	90.9	2069.64	91.1	1647.18	91	705.265	90.9	-100.021	90.9	-150.956	91	-95.843
91	2203.98	91.2	2292.71	91	2069.89	91.2	1647.77	91.1	707.398	91	-99.7078	91	-151.014	91.1	-95.9375
91.1	2204.16	91.3	2292.93	91.1	2070.13	91.3	1648.36	91.2	709.502	91.1	-99.3727	91.1	-151.076	91.2	-96.0063
91.2	2204.33	91.4	2293.12	91.2	2070.38	91.4	1648.96	91.3	711.605	91.2	-99.0523	91.2	-151.202	91.3	-96.125
91.3	2204.5	91.5	2293.31	91.3	2070.66	91.5	1649.55	91.4	713.721	91.3	-98.7274	91.3	-151.298	91.4	-96.207
91.4	2204.71	91.6	2293.51	91.4	2070.93	91.6	1650.13	91.5	715.82	91.4	-98.4227	91.4	-151.362	91.5	-96.2648
91.5	2204.91	91.7	2293.7	91.5	2071.17	91.7	1650.73	91.6	717.905	91.5	-98.0992	91.5	-151.437	91.6	-96.3109
91.6	2205.11	91.8	2293.9	91.6	2071.45	91.8	1651.35	91.7	719.999	91.6	-97.7836	91.6	-151.541	91.7	-96.3742
91.7	2205.29	91.9	2294.09	91.7	2071.73	91.9	1651.96	91.8	722.081	91.7	-97.4539	91.7	-151.631	91.8	-96.4375
91.8	2205.48	92	2294.28	91.8	2072	92	1652.56	91.9	724.183	91.8	-97.1258	91.8	-151.741	91.9	-96.5226
91.9	2205.67	92.1	2294.48	91.9	2072.27	92.1	1653.13	92	726.265	91.9	-96.7836	91.9	-151.845	92	-96.6008
92	2205.86	92.2	2294.66	92	2072.57	92.2	1653.73	92.1	728.342	92	-96.4414	92	-151.894	92.1	-96.6992
92.1	2206.07	92.3	2294.84	92.1	2072.84	92.3	1654.33	92.2	730.41	92.1	-96.0992	92.1	-151.963	92.2	-96.7531
92.2	2206.25	92.4	2295.04	92.2	2073.12	92.4	1654.95	92.3	732.459	92.2	-95.7594	92.2	-152.041	92.3	-96.8234
92.3	2206.45	92.5	2295.21	92.3	2073.38	92.5	1655.56	92.4	734.534	92.3	-95.4344	92.3	-152.112	92.4	-96.8547
92.4	2206.66	92.6	2295.4	92.4	2073.61	92.6	1656.15	92.5	736.57	92.4	-95.1031	92.4	-152.197	92.5	-96.918
92.5	2206.87	92.7	2295.57	92.5	2073.8	92.7	1656.73	92.6	738.612	92.5	-94.7078	92.5	-152.284	92.6	-97.0297
92.6	2207.03	92.8	2295.74	92.6	2074.05	92.8	1657.3	92.7	740.686	92.6	-94.3484	92.6	-152.384	92.7	-97.1047
92.7	2207.21	92.9	2295.91	92.7	2074.37	92.9	1657.86	92.8	742.739	92.7	-93.9891	92.7	-152.452	92.8	-97.1563
92.8	2207.4	93	2296.11	92.8	2074.65	93	1658.45	92.9	744.777	92.8	-93.6344	92.8	-152.527	92.9	-97.2367
92.9	2207.58	93.1	2296.3	92.9	2074.99	93.1	1659	93	746.804	92.9	-93.2781	92.9	-152.587	93	-97.2961
93	2207.77	93.2	2296.49	93	2075.28	93.2	1659.58	93.1	748.827	93	-92.9305	93	-152.663	93.1	-97.3547
93.1	2207.99	93.3	2296.67	93.1	2075.59	93.3	1660.12	93.2	750.87	93.1	-92.5641	93.1	-152.718	93.2	-97.4133
93.2	2208.21	93.4	2296.86	93.2	2075.89	93.4	1660.67	93.3	752.899	93.2	-92.193	93.2	-152.775	93.3	-97.5031
93.3	2208.4	93.5	2297.02	93.3	2076.15	93.5	1661.21	93.4	754.945	93.3	-91.8242	93.3	-152.827	93.4	-97.5734
93.4	2208.56	93.6	2297.22	93.4	2076.39	93.6	1661.75	93.5	756.928	93.4	-91.4742	93.4	-152.884	93.5	-97.6563
93.5	2208.74	93.7	2297.43	93.5	2076.63	93.7	1662.27	93.6	758.901	93.5	-91.1063	93.5	-152.932	93.6	-97.7258
93.6	2208.91	93.8	2297.64	93.6	2076.85	93.8	1662.82	93.7	760.882	93.6	-90.7594	93.6	-152.976	93.7	-97.7758
93.7	2209.09	93.9	2297.83	93.7	2077.09	93.9	1663.36	93.8	762.882	93.7	-90.443	93.7	-153.029	93.8	-97.8672
93.8	2209.31	94	2298.02	93.8	2077.33	94	1663.92	93.9	764.867	93.8	-90.0906	93.8	-153.097	93.9	-97.9555
93.9	2209.49	94.1	2298.2	93.9	2077.59	94.1	1664.47	94	766.85	93.9	-89.7195	93.9	-153.174	94	-98.0703
94	2209.68	94.2	2298.38	94	2077.83	94.2	1665.02	94.1	768.835	94	-89.3602	94	-153.259	94.1	-98.1633
94.1	2209.87	94.3	2298.56	94.1	2078.06	94.3	1665.54	94.2	770.804	94.1	-88.9742	94.1	-153.33	94.2	-98.2461
94.2	2210.09	94.4	2298.75	94.2	2078.32	94.4	1666.09	94.3	772.803	94.2	-88.6102	94.2	-153.427	94.3	-98.3578
94.3	2210.29	94.5	2298.93	94.3	2078.61	94.5	1666.62	94.4	774.832	94.3	-88.2469	94.3	-153.491	94.4	-98.4406
94.4	2210.5	94.6	2299.13	94.4	2078.84	94.6	1667.17	94.5	776.804	94.4	-87.8844	94.4	-153.577	94.5	-98.5203
94.5	2210.7	94.7	2299.32	94.5	2079.1	94.7	1667.74	94.6	778.687	94.5	-87.5086	94.5	-153.674	94.6	-98.6273
94.6	2210.88	94.8	2299.5	94.6	2079.36	94.8	1668.29	94.7	780.624	94.6	-87.1172	94.6	-153.772	94.7	-98.7219
94.7	2211.08	94.9	2299.69	94.7	2079.62	94.9	1668.81	94.8	782.566	94.7	-86.7242	94.7	-153.827	94.8	-98.8164
94.8	2211.26	95	2299.88	94.8	2079.86	95	1669.33	94.9	784.487	94.8	-86.3164	94.8	-153.849	94.9	-98.9102
94.9	2211.46	95.1	2300.07	94.9	2080.12	95.1	1669.86	95	786.426	94.9	-85.9117	94.9	-153.898	95	-98.9984
95	2211.63	95.2	2300.25	95	2080.36	95.2	1670.37	95.1	788.362	95	-85.5399	95	-153.97	95.1	-99.0812
95.1	2211.8	95.3	2300.44	95.1	2080.63	95.3	1670.92	95.2	790.28	95.1	-85.1688	95.1	-154.017	95.2	-99.1516
95.2	2211.97	95.4	2300.64	95.2	2080.87	95.4	1671.47	95.3	792.195	95.2	-84.7899	95.2	-154.089	95.3	-99.2461
95.3	2212.13	95.5	2300.85	95.3	2081.1	95.5	1672	95.4	794.108	95.3	-84.3914	95.3	-154.119	95.4	-99.3234
95.4	2212.3	95.6	2301.05	95.4	2081.3	95.6	1672.51	95.5	796.043	95.4	-83.9813	95.4	-154.189	95.5	-99.3984
95.5	2212.48	95.7	2301.24	95.5	2081.52	95.7	1673.02	95.6	797.953	95.5	-83.6024	95.5	-154.249	95.6	-99.4984
95.6	2212.65	95.8	2301.43	95.6	2081.77	95.8	1673.52	95.7	799.875	95.6	-83.2078	95.6	-154.303	95.7	-99.5938
95.7	2212.82	95.9	2301.64	95.7	2081.99	95.9	1674.02	95.8	801.769	95.7	-82.8328	95.7	-154.388	95.8	-99.6898
95.8	2213.01	96	2301.85	95.8	2082.23	96	1674.56	95.9	803.691	95.8	-82.4469	95.8	-154.468	95.9	-99.7734
95.9	2213.18	96.1	2302.07	95.9	2082.49	96.1	1675.09	96	805.594	95.9	-82.0703	95.9	-154.548	96	-99.8789
96	2213.35	96.2	2302.27	96	2082.74	96.2	1675.59	96.1	807.487	96	-81.6609	96	-154.619	96.1	-99.9641
96.1	2213.54	96.3	2302.48	96.1	2082.95	96.3	1676.11	96.2	809.394	96.1	-81.2742	96.1	-154.69	96.2	-100.03
96.2	2213.73	96.4	2302.69	96.2	2083.2	96.4	1676.59	96.3	811.296	96.2	-80.8672	96.2	-154.76	96.3	-100.124
96.3	2213.91	96.5	2302.89	96.3	2083.45	96.5	1677.1	96.4	813.18	96.3	-80.4883	96.3	-154.847	96.4	-100.195
96.4	2214.1	96.6	2303.07	96.4	2083.71	96.6	1677.57	96.5	815.054	96.4	-80.0836	96.4	-154.924	96.5	-100.273
96.5	2214.31	96.7	2303.27	96.5	2083.96	96.7	1678.05	96.6	816.894	96.5	-79.6922	96.5	-154.978	96.6	-100.359
96.6	2214.48	96.8	2303.46	96.6	2084.2	96.8	1678.51	96.7	818.761	96.6	-79.282	96.6	-155.022	96.7	-100.416
96.7	2214.66	96.9	2303.63	96.7	2084.44	96.9	1678.98	96.8	820.613	96.7	-78.8867	96.7	-155.096	96.8	-100.48
96.8	2214.85	97	2303.84	96.8	2084.7	97	1679.46	96.9	822.472	96.8	-78.4859	96.8	-155.15	96.9	-100.554
96.9	2215.02	97.1	2304.01	96.9	2084.94	97.1	1679.92	97	824.308	96.9	-78.1141	96.9	-155.194	97	-100.623
97	2215.2	97.2	2304.21	97	2085.19	97.2	1680.38	97.1	826.159	97	-77.7148	97	-155.241	97.1	-100.683
97.1	2215.39	97.3	2304.44	97.1	2085.44	97.3	1680.85	97.2	827.989	97.1	-77.3172	97.1	-155.303	97.2	-100.762
97.2	2215.54	97.4	2304.59	97.2	2085.69	97.4	1681.32	97.3	829.839	97.2	-76.9352	97.2	-155.338	97.3	-100.838
97.3	2215.71	97.5	2304.77	97.3	2085.92	97.5	1681.78	97.4	831.676	97.3	-76.5352	97.3	-155.392	97.4	-100.93
97.4	2215.87	97.6	2304.91	97.4	2086.15	97.6	1682.27	97.5	833.514	97.4	-76.1461	97.4	-155.404	97.5	-101.006
97.5	2216.06	97.7	2305.08	97.5	2086.41	97.7	1682.72	97.6	835.348	97.5	-75.7656	97.5	-155.444	97.6	-101.109
97.6	2216.21	97.8	2305.27	97.6	2086.67	97.8	1683.22	97.7	837.206	97.6	-75.3914	97.6	-155.526	97.7	-101.183
97.7	2216.37	97.9	2305.45	97.7	2086.93	97.9	1683.73	97.8	839.058	97.7	-74.9977	97.7	-155.58	97.8	-101.284
97.8	2216.55	98	2305.64	97.8	2087.17	98	1684.19	97.9	840.888	97.8	-74.5945	97.8	-155.663	97.9	-101.362
97.9	2216.69	98.1	2305.82	97.9	2087.41	98.1	1684.68	98	842.718	97.9	-74.2156	97.9	-155.725	98	-101.433
98	2216.82	98.2	2306.01	98	2087.65	98.2	1685.15	98.1	844.543	98	-73.7891	98	-155.779	98.1	-101.527
98.1	2216.99	98.3	2306.18	98.1	2087.89	98.3	1685.65	98.2	846.356	98.1	-73.3867	98.1	-155.854	98.2	-101.612
98.2	2217.13	98.4	2306.36	98.2	2088.13	98.4	1686.12	98.3	848.198	98.2	-72.9852	98.2	-155.92	98.3	-101.678
98.3	2217.29	98.5	2306.54	98.3	2088.38	98.5	1686.59	98.4	849.984	98.3	-72.5586	98.3	-155.983	98.4	-101.75
98.4	2217.47	98.6	2306.76	98.4	2088.6	98.6	1687.09	98.5	851.773	98.4	-72.1531	98.4	-156.045	98.5	-101.804
98.5	2217.62	98.7	2306.95	98.5	2088.81	98.7	1687.57	98.6	853.577	98.5	-71.7156	98.5	-156.123	98.6	-101.874
98.6	2217.78	98.8	2307.13	98.6	2089.03	98.8	1688.05	98.7	855.391	98.6	-71.3008	98.6	-156.186	98.7	-101.941
98.7	2217.96	98.9	2307.29	98.7	2089.22	98.9	1688.52	98.8	857.18	98.7	-70.8602	98.7	-156.22	98.8	-102.023
98.8	2218.1	99	2307.45	98.8	2089.47	99	1688.99	98.9	858.973	98.8	-70.4617	98.8	-156.284	98.9	-102.109
98.9	2218.26	99.1	2307.64	98.9	2089.7	99.1	1689.45	99	860.777	98.9	-70.0555	98.9	-156.334	99	-102.183
99	2218.45	99.2	2307.8	99	2089.9	99.2	1689.9	99.1	862.57	99	-69.6289	99	-156.388	99.1	-102.253
99.1	2218.67	99.3	2308	99.1	2090.13	99.3	1690.34	99.2	864.352	99.1	-69.2156	99.1	-156.451	99.2	-102.33
99.2	2218.86	99.4	2308.19	99.2	2090.34	99.4	1690.77	99.3	866.141	99.2	-68.7938	99.2	-156.495	99.3	-102.418
99.3	2219.05	99.5	2308.4	99.3	2090.54	99.5	1691.21	99.4	867.922	99.3	-68.3789	99.3	-156.534	99.4	-102.534
99.4	2219.23	99.6	2308.6	99.4	2090.77	99.6	1691.65	99.5	869.707	99.4	-67.9539	99.4	-156.592	99.5	-102.612
99.5	2219.42	99.7	2308.79	99.5	2091.04	99.7	1692.09	99.6	871.492	99.5	-67.5047	99.5	-156.666	99.6	-102.741
99.6	2219.61	99.8	2309.01	99.6	2091.27	99.8	1692.52	99.7	873.269	99.6	-67.0664	99.6	-156.725	99.7	-102.82
99.7	2219.8	99.9	2309.2	99.7	2091.51	99.9	1692.95	99.8	875.031	99.7	-66.5859	99.7	-156.798	99.8	-102.886
99.8	2219.98	100	2309.4	99.8	2091.74	100	1693.38	99.9	876.769	99.8	-66.1164	99.8	-156.88	99.9	-102.894
99.9	2220.21	100.1	2309.53	99.9	2091.96	100.1	1693.8	100	878.473	99.9	-65.6492	99.9	-156.92	100	-102.93
100	2220.4	100.2	2309.68	100	2092.2	100.2	1694.22	100.1	880.16	100	-65.1445	100	-156.948	100.1	-102.98
100.1	2220.56	100.3	2309.86	100.1	2092.44	100.3	1694.65	100.2	881.871	100.1	-64.6641	100.1	-156.987	100.2	-103.054
100.2	2220.73	100.4	2310.03	100.2	2092.64	100.4	1695.11	100.3	883.585	100.2	-64.1719	100.2	-157.045	100.3	-103.132
100.3	2220.92	100.5	2310.19	100.3	2092.87	100.5	1695.54	100.4	885.301	100.3	-63.7031	100.3	-157.087	100.4	-103.191
100.4	2221.08	100.6	2310.32	100.4	2093.09	100.6	1695.97	100.5	887.005	100.4	-63.2586	100.4	-157.099	100.5	-103.268
100.5	2221.25	100.7	2310.48	100.5	2093.29	100.7	1696.41	100.6	888.691	100.5	-62.8398	100.5	-157.143	100.6	-103.391
100.6	2221.42	100.8	2310.63	100.6	2093.5	100.8	1696.85	100.7	890.386	100.6	-62.4141	100.6	-157.182	100.7	-103.479
100.7	2221.59	100.9	2310.82	100.7	2093.72	100.9	1697.26	100.8	892.067	100.7	-61.9656	100.7	-157.225	100.8	-103.559
100.8	2221.76	101	2310.98	100.8	2093.94	101	1697.69	100.9	893.757	100.8	-61.5352	100.8	-157.229	100.9	-103.632
100.9	2221.94	101.1	2311.17	100.9	2094.16	101.1	1698.11	101	895.437	100.9	-61.1141	100.9	-157.235	101	-103.727
101	2222.11	101.2	2311.34	101	2094.39	101.2	1698.54	101.1	897.126	101	-60.6953	101	-157.276	101.1	-103.819
101.1	2222.28	101.3	2311.51	101.1	2094.6	101.3	1698.99	101.2	898.804	101.1	-60.257	101.1	-157.31	101.2	-103.886
101.2	2222.43	101.4	2311.67	101.2	2094.81	101.4	1699.41	101.3	900.48	101.2	-59.8211	101.2	-157.354	101.3	-103.952
101.3	2222.6	101.5	2311.85	101.3	2095.04	101.5	1699.84	101.4	902.145	101.3	-59.368	101.3	-157.385	101.4	-104.054
101.4	2222.79	101.6	2312.04	101.4	2095.25	101.6	1700.25	101.5	903.792	101.4	-58.9484	101.4	-157.444	101.5	-104.137
101.5	2222.99	101.7	2312.21	101.5	2095.47	101.7	1700.67	101.6	905.459	101.5	-58.4766	101.5	-157.502	101.6	-104.183
101.6	2223.17	101.8	2312.38	101.6	2095.67	101.8	1701.1	101.7	907.141	101.6	-58.0039	101.6	-157.541	101.7	-104.226
101.7	2223.34	101.9	2312.57	101.7	2095.9	101.9	1701.52	101.8	908.812	101.7	-57.5399	101.7	-157.557	101.8	-104.304
101.8	2223.51	102	2312.73	101.8	2096.1	102	1701.96	101.9	910.484	101.8	-57.0578	101.8	-157.588	101.9	-104.389
101.9	2223.7	102.1	2312.88	101.9	2096.32	102.1	1702.4	102	912.145	101.9	-56.5984	101.9	-157.618	102	-104.449
102	2223.86	102.2	2313.02	102	2096.54	102.2	1702.81	102.1	913.774	102	-56.125	102	-157.642	102.1	-104.491
102.1	2224.04	102.3	2313.16	102.1	2096.74	102.3	1703.22	102.2	915.445	102.1	-55.6445	102.1	-157.659	102.2	-104.555
102.2	2224.21	102.4	2313.32	102.2	2096.94	102.4	1703.65	102.3	917.113	102.2	-55.1594	102.2	-157.712	102.3	-104.719
102.3	2224.38	102.5	2313.47	102.3	2097.13	102.5	1704.07	102.4	918.754	102.3	-54.6883	102.3	-157.747	102.4	-104.909
102.4	2224.55	102.6	2313.64	102.4	2097.34	102.6	1704.42	102.5	920.45	102.4	-54.2344	102.4	-157.776	102.5	-104.988
102.5	2224.72	102.7	2313.79	102.5	2097.54	102.7	1704.81	102.6	922.042	102.5	-53.7539	102.5	-157.783	102.6	-104.945
102.6	2224.88	102.8	2313.96	102.6	2097.77	102.8	1705.2	102.7	923.634	102.6	-53.2734	102.6	-157.807	102.7	-105.093
102.7	2225.06	102.9	2314.14	102.7	2097.97	102.9	1705.6	102.8	925.216	102.7	-52.7703	102.7	-157.83	102.8	-105.132
102.8	2225.24	103	2314.32	102.8	2098.19	103	1705.99	102.9	926.824	102.8	-52.2922	102.8	-157.859	102.9	-105.351
102.9	2225.44	103.1	2314.48	102.9	2098.41	103.1	1706.39	103	928.413	102.9	-51.8047	102.9	-157.888	103	-105.39
103	2225.6	103.2	2314.66	103	2098.62	103.2	1706.77	103.1	930.009	103	-51.3047	103	-157.932	103.1	-105.477
103.1	2225.76	103.3	2314.84	103.1	2098.86	103.3	1707.17	103.2	931.613	103.1	-50.8164	103.1	-157.987	103.2	-105.597
103.2	2225.94	103.4	2314.98	103.2	2099.07	103.4	1707.6	103.3	933.196	103.2	-50.3086	103.2	-158.018	103.3	-105.667
103.3	2226.12	103.5	2315.15	103.3	2099.33	103.5	1708.01	103.4	934.75	103.3	-49.8281	103.3	-158.055	103.4	-105.753
103.4	2226.31	103.6	2315.31	103.4	2099.58	103.6	1708.45	103.5	936.317	103.4	-49.3188	103.4	-158.096	103.5	-105.827
103.5	2226.48	103.7	2315.48	103.5	2099.77	103.7	1708.87	103.6	937.862	103.5	-48.8094	103.5	-158.142	103.6	-105.902
103.6	2226.63	103.8	2315.62	103.6	2099.97	103.8	1709.3	103.7	939.434	103.6	-48.3156	103.6	-158.194	103.7	-105.995
103.7	2226.78	103.9	2315.75	103.7	2100.17	103.9	1709.68	103.8	941	103.7	-47.7969	103.7	-158.24	103.8	-106.069
103.8	2226.95	104	2315.96	103.8	2100.4	104	1710.07	103.9	942.567	103.8	-47.2922	103.8	-158.291	103.9	-106.132
103.9	2227.11	104.1	2316.14	103.9	2100.6	104.1	1710.47	104	944.109	103.9	-46.7969	103.9	-158.366	104	-106.191
104	2227.26	104.2	2316.33	104	2100.81	104.2	1710.85	104.1	945.692	104	-46.2891	104	-158.393	104.1	-106.241
104.1	2227.44	104.3	2316.52	104.1	2101.03	104.3	1711.22	104.2	947.234	104.1	-45.7766	104.1	-158.462	104.2	-106.304
104.2	2227.62	104.4	2316.74	104.2	2101.23	104.4	1711.59	104.3	948.763	104.2	-45.2609	104.2	-158.506	104.3	-106.382
104.3	2227.77	104.5	2316.93	104.3	2101.44	104.5	1711.97	104.4	950.309	104.3	-44.7508	104.3	-158.555	104.4	-106.473
104.4	2227.94	104.6	2317.14	104.4	2101.66	104.6	1712.34	104.5	951.856	104.4	-44.2258	104.4	-158.596	104.5	-106.566
104.5	2228.11	104.7	2317.32	104.5	2101.87	104.7	1712.7	104.6	953.39	104.5	-43.7188	104.5	-158.647	104.6	-106.632
104.6	2228.3	104.8	2317.52	104.6	2102.1	104.8	1713.06	104.7	954.911	104.6	-43.1977	104.6	-158.701	104.7	-106.702
104.7	2228.49	104.9	2317.71	104.7	2102.33	104.9	1713.41	104.8	956.423	104.7	-42.6609	104.7	-158.748	104.8	-106.784
104.8	2228.67	105	2317.87	104.8	2102.54	105	1713.79	104.9	957.923	104.8	-42.1437	104.8	-158.783	104.9	-106.855
104.9	2228.85	105.1	2318.06	104.9	2102.75	105.1	1714.13	105	959.394	104.9	-41.6211	104.9	-158.807	105	-106.949
105	2229.02	105.2	2318.24	105	2102.98	105.2	1714.5	105.1	960.883	105	-41.0851	105	-158.841	105.1	-107.054
105.1	2229.19	105.3	2318.39	105.1	2103.21	105.3	1714.86	105.2	962.336	105.1	-40.5539	105.1	-158.87	105.2	-107.137
105.2	2229.36	105.4	2318.56	105.2	2103.42	105.4	1715.21	105.3	963.857	105.2	-40.0547	105.2	-158.884	105.3	-107.221
105.3	2229.53	105.5	2318.74	105.3	2103.64	105.5	1715.57	105.4	965.359	105.3	-39.5195	105.3	-158.891	105.4	-107.296
105.4	2229.69	105.6	2318.91	105.4	2103.84	105.6	1715.93	105.5	966.833	105.4	-38.9984	105.4	-158.913	105.5	-107.355
105.5	2229.82	105.7	2319.08	105.5	2104.04	105.7	1716.29	105.6	968.305	105.5	-38.4617	105.5	-158.95	105.6	-107.417
105.6	2229.94	105.8	2319.23	105.6	2104.25	105.8	1716.64	105.7	969.779	105.6	-37.9406	105.6	-158.959	105.7	-107.506
105.7	2230.07	105.9	2319.38	105.7	2104.44	105.9	1716.98	105.8	971.266	105.7	-37.4133	105.7	-158.962	105.8	-107.605
105.8	2230.22	106	2319.56	105.8	2104.63	106	1717.33	105.9	972.773	105.8	-36.8625	105.8	-158.962	105.9	-107.676
105.9	2230.38	106.1	2319.72	105.9	2104.84	106.1	1717.68	106	974.191	105.9	-36.3164	105.9	-159.006	106	-107.765
106	2230.53	106.2	2319.89	106	2105.04	106.2	1718.05	106.1	975.615	106	-35.7805	106	-159.059	106.1	-107.827
106.1	2230.7	106.3	2320.04	106.1	2105.25	106.3	1718.39	106.2	977.078	106.1	-35.2266	106.1	-159.093	106.2	-107.905
106.2	2230.84	106.4	2320.22	106.2	2105.47	106.4	1718.75	106.3	978.5	106.2	-34.675	106.2	-159.138	106.3	-107.971
106.3	2230.99	106.5	2320.38	106.3	2105.67	106.5	1719.13	106.4	979.906	106.3	-34.1094	106.3	-159.159	106.4	-108.051
106.4	2231.16	106.6	2320.55	106.4	2105.9	106.6	1719.48	106.5	981.313	106.4	-33.5781	106.4	-159.196	106.5	-108.1
106.5	2231.32	106.7	2320.72	106.5	2106.1	106.7	1719.82	106.6	982.715	106.5	-33.0266	106.5	-159.256	106.6	-108.188
106.6	2231.51	106.8	2320.9	106.6	2106.33	106.8	1720.16	106.7	984.122	106.6	-32.468	106.6	-159.299	106.7	-108.284
106.7	2231.69	106.9	2321.08	106.7	2106.55	106.9	1720.53	106.8	985.523	106.7	-31.8976	106.7	-159.322	106.8	-108.35
106.8	2231.86	107	2321.29	106.8	2106.75	107	1720.91	106.9	986.966	106.8	-31.3398	106.8	-159.365	106.9	-108.413
106.9	2232.01	107.1	2321.46	106.9	2106.98	107.1	1721.28	107	988.406	106.9	-30.7914	106.9	-159.38	107	-108.464
107	2232.2	107.2	2321.65	107	2107.22	107.2	1721.65	107.1	989.785	107	-30.2375	107	-159.39	107.1	-108.523
107.1	2232.38	107.3	2321.81	107.1	2107.41	107.3	1722.01	107.2	991.165	107.1	-29.6719	107.1	-159.399	107.2	-108.609
107.2	2232.55	107.4	2321.98	107.2	2107.61	107.4	1722.38	107.3	992.552	107.2	-29.1281	107.2	-159.404	107.3	-108.659
107.3	2232.71	107.5	2322.13	107.3	2107.81	107.5	1722.73	107.4	993.951	107.3	-28.5695	107.3	-159.389	107.4	-108.734
107.4	2232.89	107.6	2322.3	107.4	2107.99	107.6	1723.09	107.5	995.34	107.4	-28.0102	107.4	-159.412	107.5	-108.812
107.5	2233.04	107.7	2322.46	107.5	2108.17	107.7	1723.44	107.6	996.712	107.5	-27.4367	107.5	-159.44	107.6	-108.913
107.6	2233.23	107.8	2322.61	107.6	2108.35	107.8	1723.8	107.7	998.094	107.6	-26.8547	107.6	-159.442	107.7	-108.984
107.7	2233.39	107.9	2322.76	107.7	2108.51	107.9	1724.1	107.8	999.45	107.7	-26.293	107.7	-159.448	107.8	-109.063
107.8	2233.57	108	2322.9	107.8	2108.68	108	1724.44	107.9	1000.81	107.8	-25.7133	107.8	-159.477	107.9	-109.116
107.9	2233.76	108.1	2323.02	107.9	2108.87	108.1	1724.78	108	1002.21	107.9	-25.1055	107.9	-159.506	108	-109.202
108	2233.92	108.2	2323.17	108	2109.08	108.2	1725.11	108.1	1003.59	108	-24.5305	108	-159.549	108.1	-109.27
108.1	2234.08	108.3	2323.33	108.1	2109.27	108.3	1725.43	108.2	1004.95	108.1	-23.9391	108.1	-159.576	108.2	-109.373
108.2	2234.24	108.4	2323.48	108.2	2109.47	108.4	1725.78	108.3	1006.32	108.2	-23.3633	108.2	-159.595	108.3	-109.409
108.3	2234.4	108.5	2323.62	108.3	2109.66	108.5	1726.11	108.4	1007.7	108.3	-22.7914	108.3	-159.634	108.4	-109.5
108.4	2234.56	108.6	2323.77	108.4	2109.87	108.6	1726.42	108.5	1009.08	108.4	-22.2031	108.4	-159.69	108.5	-109.573
108.5	2234.73	108.7	2323.9	108.5	2110.08	108.7	1726.76	108.6	1010.42	108.5	-21.6164	108.5	-159.736	108.6	-109.639
108.6	2234.9	108.8	2324.06	108.6	2110.26	108.8	1727.09	108.7	1011.72	108.6	-21.0344	108.6	-159.759	108.7	-109.706
108.7	2235.08	108.9	2324.22	108.7	2110.47	108.9	1727.43	108.8	1013.04	108.7	-20.4601	108.7	-159.795	108.8	-109.77
108.8	2235.26	109	2324.35	108.8	2110.69	109	1727.76	108.9	1014.33	108.8	-19.8734	108.8	-159.791	108.9	-109.83
108.9	2235.4	109.1	2324.51	108.9	2110.86	109.1	1728.08	109	1015.67	108.9	-19.3078	108.9	-159.817	109	-109.894
109	2235.56	109.2	2324.66	109	2111.04	109.2	1728.41	109.1	1016.99	109	-18.7375	109	-159.855	109.1	-109.98
109.1	2235.74	109.3	2324.81	109.1	2111.22	109.3	1728.74	109.2	1018.31	109.1	-18.1476	109.1	-159.88	109.2	-110.054
109.2	2235.9	109.4	2324.94	109.2	2111.4	109.4	1729.04	109.3	1019.61	109.2	-17.5851	109.2	-159.892	109.3	-110.108
109.3	2236.05	109.5	2325.1	109.3	2111.57	109.5	1729.37	109.4	1020.91	109.3	-16.9992	109.3	-159.909	109.4	-110.18
109.4	2236.21	109.6	2325.27	109.4	2111.75	109.6	1729.72	109.5	1022.23	109.4	-16.4133	109.4	-159.916	109.5	-110.258
109.5	2236.39	109.7	2325.41	109.5	2111.92	109.7	1730.07	109.6	1023.57	109.5	-15.8195	109.5	-159.919	109.6	-110.337
109.6	2236.56	109.8	2325.56	109.6	2112.08	109.8	1730.41	109.7	1024.88	109.6	-15.225	109.6	-159.916	109.7	-110.402
109.7	2236.71	109.9	2325.7	109.7	2112.27	109.9	1730.74	109.8	1026.19	109.7	-14.6273	109.7	-159.943	109.8	-110.496
109.8	2236.87	110	2325.84	109.8	2112.44	110	1731.08	109.9	1027.52	109.8	-14.007	109.8	-159.962	109.9	-110.559
109.9	2237.05	110.1	2326.02	109.9	2112.61	110.1	1731.42	110	1028.83	109.9	-13.4047	109.9	-159.998	110	-110.644
110	2237.22	110.2	2326.19	110	2112.83	110.2	1731.73	110.1	1030.14	110	-12.8047	110	-160.02	110.1	-110.716
110.1	2237.35	110.3	2326.36	110.1	2113.04	110.3	1732.06	110.2	1031.46	110.1	-12.2055	110.1	-160.038	110.2	-110.765
110.2	2237.48	110.4	2326.53	110.2	2113.23	110.4	1732.38	110.3	1032.79	110.2	-11.6008	110.2	-160.059	110.3	-110.808
110.3	2237.62	110.5	2326.68	110.3	2113.39	110.5	1732.73	110.4	1034.08	110.3	-10.975	110.3	-160.088	110.4	-110.902
110.4	2237.78	110.6	2326.85	110.4	2113.6	110.6	1733.04	110.5	1035.38	110.4	-10.3578	110.4	-160.123	110.5	-110.984
110.5	2237.99	110.7	2327.02	110.5	2113.8	110.7	1733.37	110.6	1036.66	110.5	-9.72186	110.5	-160.166	110.6	-111.027
110.6	2238.16	110.8	2327.18	110.6	2114	110.8	1733.69	110.7	1037.95	110.6	-9.10547	110.6	-160.173	110.7	-111.09
110.7	2238.33	110.9	2327.35	110.7	2114.2	110.9	1734.03	110.8	1039.23	110.7	-8.47501	110.7	-160.158	110.8	-111.17
110.8	2238.49	111	2327.5	110.8	2114.39	111	1734.35	110.9	1040.46	110.8	-7.84296	110.8	-160.146	110.9	-111.195
110.9	2238.65	111.1	2327.66	110.9	2114.6	111.1	1734.67	111	1041.71	110.9	-7.21249	110.9	-160.141	111	-111.273
111	2238.84	111.2	2327.81	111	2114.81	111.2	1735	111.1	1042.95	111	-6.59766	111	-160.151	111.1	-111.347
111.1	2238.99	111.3	2327.98	111.1	2115.01	111.3	1735.33	111.2	1044.19	111.1	-5.94766	111.1	-160.154	111.2	-111.418
111.2	2239.15	111.4	2328.12	111.2	2115.18	111.4	1735.66	111.3	1045.41	111.2	-5.31876	111.2	-160.146	111.3	-111.51
111.3	2239.33	111.5	2328.26	111.3	2115.39	111.5	1736.01	111.4	1046.62	111.3	-4.66327	111.3	-160.127	111.4	-111.586
111.4	2239.48	111.6	2328.42	111.4	2115.58	111.6	1736.35	111.5	1047.83	111.4	-4.01328	111.4	-160.119	111.5	-111.675
111.5	2239.65	111.7	2328.55	111.5	2115.73	111.7	1736.7	111.6	1049.01	111.5	-3.37735	111.5	-160.107	111.6	-111.76
111.6	2239.82	111.8	2328.68	111.6	2115.86	111.8	1737.02	111.7	1050.21	111.6	-2.73358	111.6	-160.115	111.7	-111.823
111.7	2239.99	111.9	2328.83	111.7	2116.03	111.9	1737.32	111.8	1051.39	111.7	-2.07343	111.7	-160.157	111.8	-111.894
111.8	2240.16	112	2328.98	111.8	2116.23	112	1737.63	111.9	1052.59	111.8	-1.44766	111.8	-160.193	111.9	-111.972
111.9	2240.32	112.1	2329.14	111.9	2116.41	112.1	1737.92	112	1053.79	111.9	-0.823425	111.9	-160.205	112	-112.059
112	2240.49	112.2	2329.27	112	2116.6	112.2	1738.21	112.1	1055	112	-0.18985	112	-160.224	112.1	-112.136
112.1	2240.66	112.3	2329.41	112.1	2116.76	112.3	1738.49	112.2	1056.2	112.1	0.458588	112.1	-160.232	112.2	-112.209
112.2	2240.8	112.4	2329.56	112.2	2116.95	112.4	1738.77	112.3	1057.4	112.2	1.09921	112.2	-160.236	112.3	-112.284
112.3	2240.99	112.5	2329.73	112.3	2117.13	112.5	1739.05	112.4	1058.57	112.3	1.74374	112.3	-160.248	112.4	-112.348
112.4	2241.16	112.6	2329.87	112.4	2117.32	112.6	1739.3	112.5	1059.77	112.4	2.37265	112.4	-160.278	112.5	-112.42
112.5	2241.33	112.7	2330.03	112.5	2117.51	112.7	1739.57	112.6	1060.97	112.5	2.99689	112.5	-160.295	112.6	-112.48
112.6	2241.49	112.8	2330.19	112.6	2117.72	112.8	1739.82	112.7	1062.15	112.6	3.64218	112.6	-160.311	112.7	-112.546
112.7	2241.64	112.9	2330.34	112.7	2117.89	112.9	1740.1	112.8	1063.3	112.7	4.27423	112.7	-160.309	112.8	-112.608
112.8	2241.8	113	2330.5	112.8	2118.06	113	1740.38	112.9	1064.48	112.8	4.91953	112.8	-160.318	112.9	-112.68
112.9	2241.97	113.1	2330.65	112.9	2118.25	113.1	1740.68	113	1065.65	112.9	5.58749	112.9	-160.314	113	-112.748
113	2242.13	113.2	2330.82	113	2118.4	113.2	1740.95	113.1	1066.82	113	6.24765	113	-160.321	113.1	-112.84
113.1	2242.29	113.3	2330.96	113.1	2118.56	113.3	1741.25	113.2	1067.95	113.1	6.90781	113.1	-160.338	113.2	-112.901
113.2	2242.43	113.4	2331.12	113.2	2118.72	113.4	1741.55	113.3	1069.09	113.2	7.56485	113.2	-160.357	113.3	-112.964
113.3	2242.61	113.5	2331.29	113.3	2118.9	113.5	1741.86	113.4	1070.2	113.3	8.20392	113.3	-160.36	113.4	-113.038
113.4	2242.76	113.6	2331.42	113.4	2119.08	113.6	1742.14	113.5	1071.3	113.4	8.84921	113.4	-160.37	113.5	-113.09
113.5	2242.92	113.7	2331.56	113.5	2119.25	113.7	1742.44	113.6	1072.41	113.5	9.50235	113.5	-160.396	113.6	-113.175
113.6	2243.09	113.8	2331.68	113.6	2119.41	113.8	1742.73	113.7	1073.54	113.6	10.1891	113.6	-160.399	113.7	-113.255
113.7	2243.25	113.9	2331.82	113.7	2119.6	113.9	1743.03	113.8	1074.66	113.7	10.8445	113.7	-160.416	113.8	-113.328
113.8	2243.43	114	2331.98	113.8	2119.8	114	1743.34	113.9	1075.79	113.8	11.5016	113.8	-160.452	113.9	-113.417
113.9	2243.61	114.1	2332.11	113.9	2119.95	114.1	1743.6	114	1076.88	113.9	12.1531	113.9	-160.474	114	-113.491
114	2243.78	114.2	2332.25	114	2120.13	114.2	1743.87	114.1	1078	114	12.8062	114	-160.489	114.1	-113.57
114.1	2243.95	114.3	2332.39	114.1	2120.34	114.3	1744.16	114.2	1079.11	114.1	13.4781	114.1	-160.502	114.2	-113.628
114.2	2244.12	114.4	2332.53	114.2	2120.52	114.4	1744.44	114.3	1080.25	114.2	14.1508	114.2	-160.525	114.3	-113.702
114.3	2244.31	114.5	2332.68	114.3	2120.7	114.5	1744.74	114.4	1081.37	114.3	14.8453	114.3	-160.537	114.4	-113.765
114.4	2244.46	114.6	2332.81	114.4	2120.88	114.6	1745.04	114.5	1082.48	114.4	15.5414	114.4	-160.569	114.5	-113.848
114.5	2244.63	114.7	2332.98	114.5	2121.05	114.7	1745.29	114.6	1083.61	114.5	16.2602	114.5	-160.591	114.6	-113.92
114.6	2244.75	114.8	2333.15	114.6	2121.24	114.8	1745.6	114.7	1084.7	114.6	16.9734	114.6	-160.6	114.7	-113.979
114.7	2244.89	114.9	2333.35	114.7	2121.38	114.9	1745.89	114.8	1085.81	114.7	17.6383	114.7	-160.602	114.8	-114.023
114.8	2245.03	115	2333.51	114.8	2121.53	115	1746.18	114.9	1086.91	114.8	18.3258	114.8	-160.615	114.9	-114.098
114.9	2245.17	115.1	2333.66	114.9	2121.7	115.1	1746.47	115	1087.98	114.9	19.018	114.9	-160.615	115	-114.175
115	2245.31	115.2	2333.83	115	2121.87	115.2	1746.79	115.1	1089.04	115	19.7437	115	-160.61	115.1	-114.213
115.1	2245.43	115.3	2333.98	115.1	2122.04	115.3	1747.1	115.2	1090.13	115.1	20.432	115.1	-160.616	115.2	-114.265
115.2	2245.56	115.4	2334.13	115.2	2122.19	115.4	1747.39	115.3	1091.18	115.2	21.1391	115.2	-160.607	115.3	-114.355
115.3	2245.69	115.5	2334.26	115.3	2122.33	115.5	1747.7	115.4	1092.24	115.3	21.8375	115.3	-160.619	115.4	-114.433
115.4	2245.83	115.6	2334.4	115.4	2122.5	115.6	1747.99	115.5	1093.32	115.4	22.5172	115.4	-160.609	115.5	-114.503
115.5	2245.98	115.7	2334.52	115.5	2122.7	115.7	1748.27	115.6	1094.41	115.5	23.2047	115.5	-160.604	115.6	-114.573
115.6	2246.13	115.8	2334.64	115.6	2122.86	115.8	1748.56	115.7	1095.47	115.6	23.8844	115.6	-160.566	115.7	-114.683
115.7	2246.3	115.9	2334.77	115.7	2123.03	115.9	1748.85	115.8	1096.51	115.7	24.5734	115.7	-160.556	115.8	-114.781
115.8	2246.46	116	2334.89	115.8	2123.2	116	1749.13	115.9	1097.57	115.8	25.2984	115.8	-160.556	115.9	-114.881
115.9	2246.64	116.1	2335.01	115.9	2123.38	116.1	1749.41	116	1098.6	115.9	26.0086	115.9	-160.541	116	-114.937
116	2246.8	116.2	2335.15	116	2123.54	116.2	1749.69	116.1	1099.67	116	26.7289	116	-160.532	116.1	-115.003
116.1	2246.94	116.3	2335.27	116.1	2123.72	116.3	1749.95	116.2	1100.72	116.1	27.4516	116.1	-160.52	116.2	-115.112
116.2	2247.13	116.4	2335.39	116.2	2123.92	116.4	1750.21	116.3	1101.75	116.2	28.1734	116.2	-160.522	116.3	-115.202
116.3	2247.31	116.5	2335.54	116.3	2124.07	116.5	1750.5	116.4	1102.78	116.3	28.8844	116.3	-160.513	116.4	-115.284
116.4	2247.46	116.6	2335.7	116.4	2124.24	116.6	1750.77	116.5	1103.8	116.4	29.6039	116.4	-160.498	116.5	-115.389
116.5	2247.64	116.7	2335.83	116.5	2124.38	116.7	1751.05	116.6	1104.82	116.5	30.3531	116.5	-160.478	116.6	-115.48
116.6	2247.78	116.8	2335.99	116.6	2124.55	116.8	1751.31	116.7	1105.85	116.6	31.093	116.6	-160.447	116.7	-115.549
116.7	2247.94	116.9	2336.14	116.7	2124.74	116.9	1751.58	116.8	1106.88	116.7	31.8304	116.7	-160.459	116.8	-115.609
116.8	2248.11	117	2336.31	116.8	2124.94	117	1751.85	116.9	1107.92	116.8	32.5758	116.8	-160.454	116.9	-115.683
116.9	2248.25	117.1	2336.45	116.9	2125.1	117.1	1752.12	117	1108.96	116.9	33.3187	116.9	-160.411	117	-115.777
117	2248.29	117.2	2336.62	117	2125.27	117.2	1752.4	117.1	1110	117	34.0804	117	-160.408	117.1	-115.866
117.1	2248.41	117.3	2336.78	117.1	2125.47	117.3	1752.67	117.2	1111.01	117.1	34.8141	117.1	-160.372	117.2	-115.949
117.2	2248.49	117.4	2336.93	117.2	2125.65	117.4	1752.95	117.3	1112.05	117.2	35.5375	117.2	-160.377	117.3	-116.002
117.3	2248.59	117.5	2337.09	117.3	2125.8	117.5	1753.23	117.4	1113.06	117.3	36.2679	117.3	-160.38	117.4	-116.042
117.4	2248.81	117.6	2337.24	117.4	2125.97	117.6	1753.48	117.5	1114.06	117.4	37.0179	117.4	-160.37	117.5	-116.116
117.5	2249.01	117.7	2337.39	117.5	2126.16	117.7	1753.75	117.6	1115.05	117.5	37.7672	117.5	-160.364	117.6	-116.163
117.6	2249.08	117.8	2337.57	117.6	2126.36	117.8	1754.01	117.7	1116.04	117.6	38.4938	117.6	-160.377	117.7	-116.219
117.7	2249.22	117.9	2337.72	117.7	2126.54	117.9	1754.27	117.8	1117.02	117.7	39.2336	117.7	-160.38	117.8	-116.296
117.8	2249.38	118	2337.88	117.8	2126.67	118	1754.51	117.9	1117.96	117.8	39.9547	117.8	-160.372	117.9	-116.359
117.9	2249.52	118.1	2338.04	117.9	2126.85	118.1	1754.76	118	1118.93	117.9	40.6781	117.9	-160.396	118	-116.417
118	2249.66	118.2	2338.22	118	2127.04	118.2	1755.04	118.1	1119.9	118	41.4109	118	-160.416	118.1	-116.499
118.1	2249.81	118.3	2338.38	118.1	2127.19	118.3	1755.29	118.2	1120.86	118.1	42.1203	118.1	-160.391	118.2	-116.548
118.2	2249.94	118.4	2338.51	118.2	2127.35	118.4	1755.56	118.3	1121.85	118.2	42.8461	118.2	-160.318	118.3	-116.59
118.3	2250.1	118.5	2338.66	118.3	2127.52	118.5	1755.8	118.4	1122.83	118.3	43.5914	118.3	-160.29	118.4	-116.655
118.4	2250.25	118.6	2338.83	118.4	2127.69	118.6	1756.06	118.5	1123.8	118.4	44.3234	118.4	-160.275	118.5	-116.713
118.5	2250.4	118.7	2338.98	118.5	2127.87	118.7	1756.31	118.6	1124.75	118.5	45.0672	118.5	-160.279	118.6	-116.745
118.6	2250.54	118.8	2339.1	118.6	2128.05	118.8	1756.58	118.7	1125.74	118.6	45.8148	118.6	-160.263	118.7	-116.819
118.7	2250.71	118.9	2339.22	118.7	2128.21	118.9	1756.83	118.8	1126.72	118.7	46.5734	118.7	-160.26	118.8	-116.905
118.8	2250.87	119	2339.38	118.8	2128.38	119	1757.09	118.9	1127.72	118.8	47.3109	118.8	-160.255	118.9	-116.98
118.9	2251.03	119.1	2339.51	118.9	2128.55	119.1	1757.36	119	1128.72	118.9	48.0719	118.9	-160.267	119	-117.061
119	2251.21	119.2	2339.65	119	2128.69	119.2	1757.64	119.1	1129.67	119	48.8312	119	-160.271	119.1	-117.12
119.1	2251.36	119.3	2339.77	119.1	2128.86	119.3	1757.9	119.2	1130.64	119.1	49.5961	119.1	-160.263	119.2	-117.172
119.2	2251.54	119.4	2339.91	119.2	2129.03	119.4	1758.14	119.3	1131.58	119.2	50.361	119.2	-160.243	119.3	-117.213
119.3	2251.69	119.5	2340.08	119.3	2129.2	119.5	1758.4	119.4	1132.51	119.3	51.1351	119.3	-160.26	119.4	-117.277
119.4	2251.84	119.6	2340.24	119.4	2129.37	119.6	1758.65	119.5	1133.45	119.4	51.8969	119.4	-160.243	119.5	-117.362
119.5	2252	119.7	2340.39	119.5	2129.53	119.7	1758.9	119.6	1134.4	119.5	52.6594	119.5	-160.216	119.6	-117.456
119.6	2252.15	119.8	2340.54	119.6	2129.69	119.8	1759.18	119.7	1135.33	119.6	53.4117	119.6	-160.18	119.7	-117.512
119.7	2252.31	119.9	2340.72	119.7	2129.84	119.9	1759.44	119.8	1136.22	119.7	54.1859	119.7	-160.087	119.8	-117.541
119.8	2252.46	120	2340.84	119.8	2130.01	120	1759.68	119.9	1137.11	119.8	54.968	119.8	-160.013	119.9	-117.588
119.9	2252.61	120.1	2340.96	119.9	2130.19	120.1	1759.94	120	1137.99	119.9	55.7562	119.9	-159.978	120	-117.641
120	2252.75	120.2	2341.07	120	2130.34	120.2	1760.2	120.1	1138.89	120	56.5485	120	-160.083	120.1	-117.698
120.1	2252.88	120.3	2341.17	120.1	2130.5	120.3	1760.43	120.2	1139.81	120.1	57.3391	120.1	-160.138	120.2	-117.757
120.2	2253.04	120.4	2341.3	120.2	2130.65	120.4	1760.67	120.3	1140.71	120.2	58.1156	120.2	-160.119	120.3	-117.808
120.3	2253.17	120.5	2341.41	120.3	2130.81	120.5	1760.9	120.4	1141.62	120.3	58.9008	120.3	-160.083	120.4	-117.85
120.4	2253.29	120.6	2341.52	120.4	2130.98	120.6	1761.18	120.5	1142.53	120.4	59.682	120.4	-160.052	120.5	-117.898
120.5	2253.45	120.7	2341.64	120.5	2131.14	120.7	1761.42	120.6	1143.45	120.5	60.4828	120.5	-160.037	120.6	-117.952
120.6	2253.62	120.8	2341.75	120.6	2131.3	120.8	1761.67	120.7	1144.35	120.6	61.2734	120.6	-160.029	120.7	-117.98
120.7	2253.77	120.9	2341.89	120.7	2131.46	120.9	1761.94	120.8	1145.27	120.7	62.0797	120.7	-159.998	120.8	-118.046
120.8	2253.91	121	2342.02	120.8	2131.61	121	1762.19	120.9	1146.16	120.8	62.8586	120.8	-159.998	120.9	-118.12
120.9	2254.06	121.1	2342.17	120.9	2131.78	121.1	1762.44	121	1147.05	120.9	63.6351	120.9	-160.013	121	-118.148
121	2254.2	121.2	2342.33	121	2131.93	121.2	1762.7	121.1	1147.94	121	64.425	121	-160.013	121.1	-118.209
121.1	2254.37	121.3	2342.5	121.1	2132.11	121.3	1762.97	121.2	1148.83	121.1	65.2375	121.1	-159.986	121.2	-118.261
121.2	2254.5	121.4	2342.65	121.2	2132.29	121.4	1763.24	121.3	1149.71	121.2	66.0453	121.2	-159.986	121.3	-118.328
121.3	2254.65	121.5	2342.8	121.3	2132.45	121.5	1763.51	121.4	1150.6	121.3	66.8422	121.3	-159.998	121.4	-118.374
121.4	2254.82	121.6	2342.96	121.4	2132.6	121.6	1763.76	121.5	1151.48	121.4	67.6398	121.4	-159.993	121.5	-118.468
121.5	2255.01	121.7	2343.1	121.5	2132.74	121.7	1763.99	121.6	1152.33	121.5	68.4508	121.5	-159.981	121.6	-118.527
121.6	2255.16	121.8	2343.25	121.6	2132.91	121.8	1764.26	121.7	1153.17	121.6	69.2211	121.6	-159.971	121.7	-118.561
121.7	2255.33	121.9	2343.38	121.7	2133.06	121.9	1764.52	121.8	1154.02	121.7	70.0461	121.7	-159.978	121.8	-118.616
121.8	2255.5	122	2343.51	121.8	2133.22	122	1764.77	121.9	1154.87	121.8	70.8469	121.8	-159.966	121.9	-118.699
121.9	2255.65	122.1	2343.67	121.9	2133.39	122.1	1765.02	122	1155.72	121.9	71.6672	121.9	-159.942	122	-118.764
122	2255.79	122.2	2343.81	122	2133.52	122.2	1765.29	122.1	1156.58	122	72.5023	122	-159.934	122.1	-118.83
122.1	2255.96	122.3	2343.94	122.1	2133.67	122.3	1765.54	122.2	1157.4	122.1	73.3031	122.1	-159.916	122.2	-118.905
122.2	2256.1	122.4	2344.08	122.2	2133.81	122.4	1765.78	122.3	1158.26	122.2	74.1008	122.2	-159.908	122.3	-118.959
122.3	2256.27	122.5	2344.25	122.3	2133.94	122.5	1766.03	122.4	1159.12	122.3	74.8929	122.3	-159.873	122.4	-119.027
122.4	2256.4	122.6	2344.37	122.4	2134.1	122.6	1766.28	122.5	1159.95	122.4	75.7211	122.4	-159.837	122.5	-119.116
122.5	2256.56	122.7	2344.52	122.5	2134.27	122.7	1766.52	122.6	1160.75	122.5	76.5539	122.5	-159.818	122.6	-119.163
122.6	2256.7	122.8	2344.68	122.6	2134.43	122.8	1766.76	122.7	1161.58	122.6	77.3859	122.6	-159.816	122.7	-119.25
122.7	2256.85	122.9	2344.85	122.7	2134.58	122.9	1767	122.8	1162.43	122.7	78.2141	122.7	-159.83	122.8	-119.342
122.8	2256.97	123	2345.01	122.8	2134.77	123	1767.25	122.9	1163.28	122.8	79.0297	122.8	-159.805	122.9	-119.425
122.9	2257.1	123.1	2345.15	122.9	2134.93	123.1	1767.47	123	1164.1	122.9	79.85	122.9	-159.821	123	-119.476
123	2257.26	123.2	2345.31	123	2135.09	123.2	1767.68	123.1	1164.93	123	80.668	123	-159.81	123.1	-119.554
123.1	2257.44	123.3	2345.48	123.1	2135.26	123.3	1767.88	123.2	1165.77	123.1	81.4953	123.1	-159.759	123.2	-119.616
123.2	2257.54	123.4	2345.61	123.2	2135.45	123.4	1768.08	123.3	1166.62	123.2	82.3336	123.2	-159.743	123.3	-119.695
123.3	2257.69	123.5	2345.75	123.3	2135.63	123.5	1768.34	123.4	1167.45	123.3	83.1602	123.3	-159.743	123.4	-119.757
123.4	2257.81	123.6	2345.86	123.4	2135.81	123.6	1768.56	123.5	1168.29	123.4	84.0101	123.4	-159.721	123.5	-119.791
123.5	2257.94	123.7	2346.02	123.5	2136	123.7	1768.79	123.6	1169.11	123.5	84.8304	123.5	-159.723	123.6	-119.862
123.6	2258.06	123.8	2346.16	123.6	2136.17	123.8	1769.05	123.7	1169.93	123.6	85.6555	123.6	-159.723	123.7	-119.964
123.7	2258.21	123.9	2346.26	123.7	2136.31	123.9	1769.29	123.8	1170.75	123.7	86.4719	123.7	-159.689	123.8	-120.034
123.8	2258.35	124	2346.37	123.8	2136.47	124	1769.53	123.9	1171.55	123.8	87.3078	123.8	-159.653	123.9	-120.12
123.9	2258.5	124.1	2346.53	123.9	2136.65	124.1	1769.76	124	1172.38	123.9	88.1359	123.9	-159.638	124	-120.168
124	2258.63	124.2	2346.67	124	2136.83	124.2	1769.98	124.1	1173.18	124	88.9742	124	-159.614	124.1	-120.268
124.1	2258.78	124.3	2346.79	124.1	2137	124.3	1770.23	124.2	1174.01	124.1	89.8086	124.1	-159.604	124.2	-120.332
124.2	2258.92	124.4	2346.92	124.2	2137.16	124.4	1770.47	124.3	1174.86	124.2	90.6555	124.2	-159.595	124.3	-120.428
124.3	2259.09	124.5	2347.07	124.3	2137.31	124.5	1770.7	124.4	1175.7	124.3	91.4828	124.3	-159.56	124.4	-120.508
124.4	2259.22	124.6	2347.2	124.4	2137.46	124.6	1770.92	124.5	1176.57	124.4	92.3117	124.4	-159.536	124.5	-120.605
124.5	2259.37	124.7	2347.33	124.5	2137.64	124.7	1771.14	124.6	1177.37	124.5	93.1781	124.5	-159.505	124.6	-120.709
124.6	2259.52	124.8	2347.46	124.6	2137.8	124.8	1771.36	124.7	1178.14	124.6	94.0422	124.6	-159.451	124.7	-120.784
124.7	2259.64	124.9	2347.59	124.7	2137.96	124.9	1771.57	124.8	1178.95	124.7	94.8898	124.7	-159.402	124.8	-120.843
124.8	2259.77	125	2347.73	124.8	2138.13	125	1771.78	124.9	1179.71	124.8	95.7648	124.8	-159.364	124.9	-120.918
124.9	2259.91	125.1	2347.85	124.9	2138.29	125.1	1771.98	125	1180.48	124.9	96.6398	124.9	-159.337	125	-120.971
125	2260.03	125.2	2347.95	125	2138.44	125.2	1772.21	125.1	1181.24	125	97.5109	125	-159.291	125.1	-121.042
125.1	2260.11	125.3	2348.04	125.1	2138.59	125.3	1772.45	125.2	1181.97	125.1	98.382	125.1	-159.247	125.2	-121.102
125.2	2260.3	125.4	2348.15	125.2	2138.76	125.4	1772.66	125.3	1182.74	125.2	99.2609	125.2	-159.196	125.3	-121.143
125.3	2260.46	125.5	2348.29	125.3	2138.96	125.5	1772.88	125.4	1183.5	125.3	100.129	125.3	-159.177	125.4	-121.175
125.4	2260.63	125.6	2348.41	125.4	2139.13	125.6	1773.11	125.5	1184.26	125.4	101.006	125.4	-159.162	125.5	-121.245
125.5	2260.8	125.7	2348.53	125.5	2139.29	125.7	1773.34	125.6	1185.04	125.5	101.913	125.5	-159.134	125.6	-121.26
125.6	2260.94	125.8	2348.68	125.6	2139.47	125.8	1773.56	125.7	1185.78	125.6	102.792	125.6	-159.106	125.7	-121.292
125.7	2261.1	125.9	2348.81	125.7	2139.66	125.9	1773.81	125.8	1186.52	125.7	103.652	125.7	-159.068	125.8	-121.335
125.8	2261.26	126	2348.94	125.8	2139.85	126	1774.09	125.9	1187.26	125.8	104.523	125.8	-159.063	125.9	-121.437
125.9	2261.42	126.1	2349.07	125.9	2139.99	126.1	1774.32	126	1188.03	125.9	105.39	125.9	-159.052	126	-121.519
126	2261.57	126.2	2349.21	126	2140.18	126.2	1774.58	126.1	1188.76	126	106.266	126	-159.025	126.1	-121.577
126.1	2261.71	126.3	2349.38	126.1	2140.34	126.3	1774.82	126.2	1189.5	126.1	107.132	126.1	-159.021	126.2	-121.679
126.2	2261.86	126.4	2349.51	126.2	2140.44	126.4	1775.05	126.3	1190.24	126.2	108.003	126.2	-158.985	126.3	-121.741
126.3	2262.02	126.5	2349.66	126.3	2140.53	126.5	1775.33	126.4	1191	126.3	108.877	126.3	-158.97	126.4	-121.695
126.4	2262.13	126.6	2349.81	126.4	2140.67	126.6	1775.58	126.5	1191.73	126.4	109.746	126.4	-158.92	126.5	-121.827
126.5	2262.25	126.7	2349.96	126.5	2140.81	126.7	1775.83	126.6	1192.46	126.5	110.648	126.5	-158.864	126.6	-121.913
126.6	2262.39	126.8	2350.14	126.6	2140.95	126.8	1776.07	126.7	1193.16	126.6	111.518	126.6	-158.84	126.7	-121.964
126.7	2262.52	126.9	2350.29	126.7	2141.08	126.9	1776.29	126.8	1193.89	126.7	112.394	126.7	-158.798	126.8	-122.046
126.8	2262.66	127	2350.42	126.8	2141.22	127	1776.49	126.9	1194.63	126.8	113.3	126.8	-158.791	126.9	-122.058
126.9	2262.8	127.1	2350.55	126.9	2141.37	127.1	1776.74	127	1195.36	126.9	114.207	126.9	-158.774	127	-122.085
127	2262.95	127.2	2350.69	127	2141.56	127.2	1776.99	127.1	1196.08	127	115.101	127	-158.755	127.1	-122.088
127.1	2263.08	127.3	2350.82	127.1	2141.72	127.3	1777.2	127.2	1196.82	127.1	116.016	127.1	-158.716	127.2	-122.155
127.2	2263.19	127.4	2350.95	127.2	2141.88	127.4	1777.42	127.3	1197.52	127.2	116.948	127.2	-158.682	127.3	-122.262
127.3	2263.33	127.5	2351.11	127.3	2142.06	127.5	1777.64	127.4	1198.23	127.3	117.89	127.3	-158.665	127.4	-122.326
127.4	2263.47	127.6	2351.25	127.4	2142.24	127.6	1777.85	127.5	1199.06	127.4	118.824	127.4	-158.634	127.5	-122.398
127.5	2263.61	127.7	2351.38	127.5	2142.37	127.7	1778.06	127.6	1199.87	127.5	119.741	127.5	-158.614	127.6	-122.483
127.6	2263.77	127.8	2351.5	127.6	2142.54	127.8	1778.29	127.7	1200.66	127.6	120.648	127.6	-158.599	127.7	-122.562
127.7	2263.92	127.9	2351.63	127.7	2142.68	127.9	1778.51	127.8	1201.22	127.7	121.558	127.7	-158.56	127.8	-122.644
127.8	2264.05	128	2351.78	127.8	2142.83	128	1778.74	127.9	1201.9	127.8	122.445	127.8	-158.536	127.9	-122.743
127.9	2264.18	128.1	2351.92	127.9	2142.97	128.1	1778.97	128	1202.6	127.9	123.331	127.9	-158.505	128	-122.83
128	2264.31	128.2	2352.07	128	2143.1	128.2	1779.19	128.1	1203.27	128	124.227	128	-158.47	128.1	-122.878
128.1	2264.45	128.3	2352.21	128.1	2143.24	128.3	1779.4	128.2	1203.97	128.1	125.12	128.1	-158.454	128.2	-122.945
128.2	2264.6	128.4	2352.37	128.2	2143.36	128.4	1779.63	128.3	1204.67	128.2	125.987	128.2	-158.447	128.3	-123.046
128.3	2264.75	128.5	2352.51	128.3	2143.51	128.5	1779.85	128.4	1205.36	128.3	126.859	128.3	-158.446	128.4	-123.136
128.4	2264.89	128.6	2352.62	128.4	2143.64	128.6	1780.07	128.5	1206.06	128.4	127.759	128.4	-158.427	128.5	-123.221
128.5	2264.99	128.7	2352.76	128.5	2143.77	128.7	1780.3	128.6	1206.78	128.5	128.635	128.5	-158.388	128.6	-123.269
128.6	2265.11	128.8	2352.9	128.6	2143.89	128.8	1780.49	128.7	1207.46	128.6	129.543	128.6	-158.349	128.7	-123.319
128.7	2265.24	128.9	2353.03	128.7	2144.04	128.9	1780.67	128.8	1208.16	128.7	130.445	128.7	-158.34	128.8	-123.378
128.8	2265.39	129	2353.16	128.8	2144.23	129	1780.89	128.9	1208.87	128.8	131.354	128.8	-158.33	128.9	-123.422
128.9	2265.52	129.1	2353.28	128.9	2144.38	129.1	1781.1	129	1209.55	128.9	132.286	128.9	-158.33	129	-123.487
129	2265.66	129.2	2353.39	129	2144.55	129.2	1781.3	129.1	1210.26	129	133.206	129	-158.31	129.1	-123.58
129.1	2265.76	129.3	2353.49	129.1	2144.7	129.3	1781.48	129.2	1210.95	129.1	134.113	129.1	-158.274	129.2	-123.648
129.2	2265.88	129.4	2353.6	129.2	2144.85	129.4	1781.69	129.3	1211.64	129.2	135.038	129.2	-158.227	129.3	-123.709
129.3	2266.07	129.5	2353.73	129.3	2144.96	129.5	1781.89	129.4	1212.31	129.3	135.948	129.3	-158.177	129.4	-123.781
129.4	2266.37	129.6	2353.83	129.4	2145.1	129.6	1782.12	129.5	1212.99	129.4	136.868	129.4	-158.119	129.5	-123.862
129.5	2266.57	129.7	2353.94	129.5	2145.26	129.7	1782.33	129.6	1213.69	129.5	137.777	129.5	-158.106	129.6	-123.925
129.6	2266.72	129.8	2354.06	129.6	2145.4	129.8	1782.52	129.7	1214.36	129.6	138.711	129.6	-158.095	129.7	-124.015
129.7	2266.84	129.9	2354.17	129.7	2145.57	129.9	1782.74	129.8	1215.03	129.7	139.616	129.7	-158.045	129.8	-124.108
129.8	2266.97	130	2354.29	129.8	2145.7	130	1782.97	129.9	1215.69	129.8	140.554	129.8	-158	129.9	-124.191
129.9	2267.12	130.1	2354.42	129.9	2145.8	130.1	1783.17	130	1216.36	129.9	141.492	129.9	-157.962	130	-124.265
130	2267.26	130.2	2354.53	130	2145.97	130.2	1783.4	130.1	1217.04	130	142.41	130	-157.891	130.1	-124.347
130.1	2267.38	130.3	2354.67	130.1	2146.12	130.3	1783.6	130.2	1217.74	130.1	143.32	130.1	-157.837	130.2	-124.432
130.2	2267.52	130.4	2354.81	130.2	2146.29	130.4	1783.84	130.3	1218.38	130.2	144.23	130.2	-157.791	130.3	-124.471
130.3	2267.68	130.5	2354.95	130.3	2146.44	130.5	1784.05	130.4	1219.04	130.3	145.172	130.3	-157.752	130.4	-124.476
130.4	2267.81	130.6	2355.08	130.4	2146.64	130.6	1784.24	130.5	1219.69	130.4	146.082	130.4	-157.735	130.5	-124.507
130.5	2267.97	130.7	2355.21	130.5	2146.78	130.7	1784.46	130.6	1220.36	130.5	146.992	130.5	-157.703	130.6	-124.538
130.6	2268.13	130.8	2355.36	130.6	2146.96	130.8	1784.69	130.7	1220.99	130.6	147.912	130.6	-157.65	130.7	-124.553
130.7	2268.3	130.9	2355.48	130.7	2147.12	130.9	1784.93	130.8	1221.64	130.7	148.832	130.7	-157.645	130.8	-124.597
130.8	2268.44	131	2355.56	130.8	2147.32	131	1785.16	130.9	1222.3	130.8	149.77	130.8	-157.622	130.9	-124.628
130.9	2268.56	131.1	2355.67	130.9	2147.48	131.1	1785.39	131	1222.96	130.9	150.706	130.9	-157.587	131	-124.635
131	2268.72	131.2	2355.8	131	2147.61	131.2	1785.6	131.1	1223.63	131	151.641	131	-157.548	131.1	-124.684
131.1	2268.86	131.3	2355.93	131.1	2147.76	131.3	1785.82	131.2	1224.29	131.1	152.575	131.1	-157.545	131.2	-124.709
131.2	2269.03	131.4	2356.05	131.2	2147.9	131.4	1786.03	131.3	1224.91	131.2	153.519	131.2	-157.555	131.3	-124.737
131.3	2269.17	131.5	2356.17	131.3	2148.03	131.5	1786.22	131.4	1225.55	131.3	154.449	131.3	-157.575	131.4	-124.796
131.4	2269.3	131.6	2356.29	131.4	2148.17	131.6	1786.43	131.5	1226.18	131.4	155.405	131.4	-157.583	131.5	-124.847
131.5	2269.44	131.7	2356.41	131.5	2148.31	131.7	1786.65	131.6	1226.81	131.5	156.352	131.5	-157.592	131.6	-124.901
131.6	2269.58	131.8	2356.56	131.6	2148.43	131.8	1786.87	131.7	1227.44	131.6	157.304	131.6	-157.649	131.7	-124.941
131.7	2269.72	131.9	2356.71	131.7	2148.53	131.9	1787.07	131.8	1228.08	131.7	158.246	131.7	-157.709	131.8	-125.014
131.8	2269.85	132	2356.86	131.8	2148.68	132	1787.29	131.9	1228.71	131.8	159.199	131.8	-157.656	131.9	-125.073
131.9	2269.98	132.1	2357.01	131.9	2148.83	132.1	1787.5	132	1229.31	131.9	160.122	131.9	-157.527	132	-125.133
132	2270.13	132.2	2357.17	132	2148.97	132.2	1787.7	132.1	1229.92	132	161.066	132	-157.458	132.1	-125.174
132.1	2270.25	132.3	2357.3	132.1	2149.12	132.3	1787.9	132.2	1230.51	132.1	161.988	132.1	-157.434	132.2	-125.198
132.2	2270.38	132.4	2357.45	132.2	2149.23	132.4	1788.11	132.3	1231.1	132.2	162.934	132.2	-157.434	132.3	-125.241
132.3	2270.5	132.5	2357.56	132.3	2149.34	132.5	1788.3	132.4	1231.72	132.3	163.918	132.3	-157.388	132.4	-125.308
132.4	2270.61	132.6	2357.7	132.4	2149.5	132.6	1788.51	132.5	1232.33	132.4	164.874	132.4	-157.33	132.5	-125.354
132.5	2270.76	132.7	2357.83	132.5	2149.66	132.7	1788.71	132.6	1232.94	132.5	165.813	132.5	-157.298	132.6	-125.373
132.6	2270.9	132.8	2357.95	132.6	2149.79	132.8	1788.9	132.7	1233.53	132.6	166.77	132.6	-157.247	132.7	-125.398
132.7	2271.04	132.9	2358.06	132.7	2149.96	132.9	1789.1	132.8	1234.13	132.7	167.741	132.7	-157.184	132.8	-125.473
132.8	2271.17	133	2358.21	132.8	2150.11	133	1789.28	132.9	1234.73	132.8	168.695	132.8	-157.142	132.9	-125.514
132.9	2271.32	133.1	2358.33	132.9	2150.27	133.1	1789.47	133	1235.31	132.9	169.68	132.9	-157.102	133	-125.561
133	2271.45	133.2	2358.47	133	2150.43	133.2	1789.65	133.1	1235.93	133	170.648	133	-157.048	133.1	-125.594
133.1	2271.58	133.3	2358.58	133.1	2150.57	133.3	1789.86	133.2	1236.53	133.1	171.595	133.1	-157.002	133.2	-125.651
133.2	2271.73	133.4	2358.72	133.2	2150.72	133.4	1790.06	133.3	1237.12	133.2	172.539	133.2	-156.953	133.3	-125.73
133.3	2271.87	133.5	2358.83	133.3	2150.91	133.5	1790.28	133.4	1237.74	133.3	173.476	133.3	-156.88	133.4	-125.799
133.4	2272.02	133.6	2359	133.4	2151.05	133.6	1790.49	133.5	1238.33	133.4	174.41	133.4	-156.798	133.5	-125.866
133.5	2272.15	133.7	2359.13	133.5	2151.22	133.7	1790.73	133.6	1238.93	133.5	175.367	133.5	-156.735	133.6	-125.937
133.6	2272.3	133.8	2359.3	133.6	2151.31	133.8	1790.93	133.7	1239.55	133.6	176.34	133.6	-156.689	133.7	-126.01
133.7	2272.43	133.9	2359.46	133.7	2151.41	133.9	1791.15	133.8	1240.12	133.7	177.297	133.7	-156.633	133.8	-126.09
133.8	2272.55	134	2359.58	133.8	2151.54	134	1791.36	133.9	1240.69	133.8	178.25	133.8	-156.606	133.9	-126.136
133.9	2272.71	134.1	2359.7	133.9	2151.7	134.1	1791.59	134	1241.28	133.9	179.211	133.9	-156.568	134	-126.187
134	2272.82	134.2	2359.84	134	2151.87	134.2	1791.83	134.1	1241.85	134	180.173	134	-156.533	134.1	-126.269
134.1	2272.96	134.3	2359.97	134.1	2152.01	134.3	1792.05	134.2	1242.41	134.1	181.172	134.1	-156.473	134.2	-126.35
134.2	2273.07	134.4	2360.09	134.2	2152.18	134.4	1792.26	134.3	1242.98	134.2	182.148	134.2	-156.462	134.3	-126.441
134.3	2273.19	134.5	2360.22	134.3	2152.34	134.5	1792.5	134.4	1243.55	134.3	183.137	134.3	-156.438	134.4	-126.502
134.4	2273.33	134.6	2360.36	134.4	2152.52	134.6	1792.67	134.5	1244.11	134.4	184.105	134.4	-156.419	134.5	-126.573
134.5	2273.47	134.7	2360.48	134.5	2152.68	134.7	1792.88	134.6	1244.7	134.5	185.091	134.5	-156.434	134.6	-126.629
134.6	2273.61	134.8	2360.58	134.6	2152.82	134.8	1793.06	134.7	1245.28	134.6	186.081	134.6	-156.388	134.7	-126.718
134.7	2273.74	134.9	2360.7	134.7	2152.96	134.9	1793.24	134.8	1245.84	134.7	187.048	134.7	-156.337	134.8	-126.777
134.8	2273.86	135	2360.82	134.8	2153.09	135	1793.45	134.9	1246.41	134.8	188.013	134.8	-156.317	134.9	-126.854
134.9	2274.01	135.1	2360.97	134.9	2153.23	135.1	1793.6	135	1246.99	134.9	189.016	134.9	-156.247	135	-126.932
135	2274.13	135.2	2361.1	135	2153.37	135.2	1793.78	135.1	1247.56	135	189.988	135	-156.216	135.1	-127.008
135.1	2274.27	135.3	2361.21	135.1	2153.49	135.3	1793.96	135.2	1248.13	135.1	190.945	135.1	-156.153	135.2	-127.061
135.2	2274.43	135.4	2361.33	135.2	2153.64	135.4	1794.13	135.3	1248.68	135.2	191.927	135.2	-156.106	135.3	-127.121
135.3	2274.58	135.5	2361.46	135.3	2153.74	135.5	1794.35	135.4	1249.24	135.3	192.934	135.3	-156.048	135.4	-127.202
135.4	2274.73	135.6	2361.58	135.4	2153.86	135.6	1794.51	135.5	1249.8	135.4	193.902	135.4	-155.998	135.5	-127.277
135.5	2274.85	135.7	2361.69	135.5	2153.99	135.7	1794.7	135.6	1250.35	135.5	194.899	135.5	-155.954	135.6	-127.327
135.6	2274.99	135.8	2361.81	135.6	2154.15	135.8	1794.88	135.7	1250.9	135.6	195.88	135.6	-155.927	135.7	-127.393
135.7	2275.13	135.9	2361.92	135.7	2154.3	135.9	1795.06	135.8	1251.44	135.7	196.855	135.7	-155.865	135.8	-127.448
135.8	2275.3	136	2362.01	135.8	2154.46	136	1795.27	135.9	1251.97	135.8	197.844	135.8	-155.798	135.9	-127.499
135.9	2275.45	136.1	2362.07	135.9	2154.6	136.1	1795.47	136	1252.52	135.9	198.861	135.9	-155.77	136	-127.566
136	2275.61	136.2	2362.2	136	2154.75	136.2	1795.68	136.1	1253.06	136	199.86	136	-155.759	136.1	-127.628
136.1	2275.77	136.3	2362.34	136.1	2154.9	136.3	1795.85	136.2	1253.59	136.1	200.88	136.1	-155.732	136.2	-127.709
136.2	2275.89	136.4	2362.43	136.2	2155.03	136.4	1796.04	136.3	1254.11	136.2	201.878	136.2	-155.716	136.3	-127.799
136.3	2276.03	136.5	2362.53	136.3	2155.18	136.5	1796.22	136.4	1254.67	136.3	202.888	136.3	-155.704	136.4	-127.871
136.4	2276.18	136.6	2362.66	136.4	2155.32	136.6	1796.43	136.5	1255.22	136.4	203.844	136.4	-155.696	136.5	-127.917
136.5	2276.33	136.7	2362.81	136.5	2155.47	136.7	1796.62	136.6	1255.77	136.5	204.86	136.5	-155.662	136.6	-128.019
136.6	2276.49	136.8	2362.93	136.6	2155.6	136.8	1796.84	136.7	1256.29	136.6	205.829	136.6	-155.621	136.7	-128.048
136.7	2276.64	136.9	2363.07	136.7	2155.72	136.9	1797.05	136.8	1256.85	136.7	206.824	136.7	-155.591	136.8	-128.07
136.8	2276.8	137	2363.23	136.8	2155.86	137	1797.26	136.9	1257.39	136.8	207.824	136.8	-155.567	136.9	-128.12
136.9	2276.94	137.1	2363.35	136.9	2155.97	137.1	1797.43	137	1257.94	136.9	208.782	136.9	-155.548	137	-128.168
137	2277.07	137.2	2363.46	137	2156.1	137.2	1797.6	137.1	1258.49	137	209.739	137	-155.528	137.1	-128.237
137.1	2277.23	137.3	2363.58	137.1	2156.23	137.3	1797.82	137.2	1259.04	137.1	210.71	137.1	-155.489	137.2	-128.269
137.2	2277.37	137.4	2363.71	137.2	2156.34	137.4	1798.01	137.3	1259.62	137.2	211.677	137.2	-155.48	137.3	-128.295
137.3	2277.53	137.5	2363.85	137.3	2156.49	137.5	1798.19	137.4	1260.15	137.3	212.666	137.3	-155.458	137.4	-128.323
137.4	2277.69	137.6	2363.95	137.4	2156.65	137.6	1798.36	137.5	1260.67	137.4	213.659	137.4	-155.431	137.5	-128.359
137.5	2277.86	137.7	2364.09	137.5	2156.8	137.7	1798.54	137.6	1261.21	137.5	214.649	137.5	-155.388	137.6	-128.393
137.6	2278.01	137.8	2364.21	137.6	2156.94	137.8	1798.72	137.7	1261.69	137.6	215.618	137.6	-155.373	137.7	-128.432
137.7	2278.16	137.9	2364.31	137.7	2157.09	137.9	1798.9	137.8	1262.17	137.7	216.618	137.7	-155.371	137.8	-128.473
137.8	2278.31	138	2364.44	137.8	2157.21	138	1799.07	137.9	1262.67	137.8	217.586	137.8	-155.361	137.9	-128.53
137.9	2278.42	138.1	2364.54	137.9	2157.33	138.1	1799.23	138	1263.19	137.9	218.548	137.9	-155.334	138	-128.573
138	2278.56	138.2	2364.7	138	2157.49	138.2	1799.42	138.1	1263.68	138	219.582	138	-155.305	138.1	-128.604
138.1	2278.7	138.3	2364.81	138.1	2157.61	138.3	1799.59	138.2	1264.18	138.1	220.587	138.1	-155.263	138.2	-128.643
138.2	2278.85	138.4	2364.93	138.2	2157.76	138.4	1799.76	138.3	1264.64	138.2	221.559	138.2	-155.211	138.3	-128.687
138.3	2278.94	138.5	2365.04	138.3	2157.88	138.5	1799.92	138.4	1265.14	138.3	222.547	138.3	-155.162	138.4	-128.726
138.4	2279.06	138.6	2365.14	138.4	2157.99	138.6	1800.12	138.5	1265.65	138.4	223.509	138.4	-155.113	138.5	-128.764
138.5	2279.17	138.7	2365.29	138.5	2158.06	138.7	1800.3	138.6	1266.15	138.5	224.484	138.5	-155.072	138.6	-128.796
138.6	2279.26	138.8	2365.41	138.6	2158.18	138.8	1800.46	138.7	1266.68	138.6	225.466	138.6	-155.027	138.7	-128.816
138.7	2279.34	138.9	2365.56	138.7	2158.28	138.9	1800.64	138.8	1267.16	138.7	226.477	138.7	-154.943	138.8	-128.85
138.8	2279.49	139	2365.67	138.8	2158.4	139	1800.81	138.9	1267.69	138.8	227.48	138.8	-154.891	138.9	-128.895
138.9	2279.6	139.1	2365.79	138.9	2158.55	139.1	1800.98	139	1268.2	138.9	228.47	138.9	-154.836	139	-128.937
139	2279.73	139.2	2365.9	139	2158.72	139.2	1801.16	139.1	1268.69	139	229.48	139	-154.778	139.1	-128.995
139.1	2279.85	139.3	2366.04	139.1	2158.85	139.3	1801.32	139.2	1269.2	139.1	230.466	139.1	-154.735	139.2	-129.027
139.2	2279.96	139.4	2366.12	139.2	2158.98	139.4	1801.47	139.3	1269.69	139.2	231.434	139.2	-154.708	139.3	-129.073
139.3	2280.06	139.5	2366.21	139.3	2159.1	139.5	1801.65	139.4	1270.19	139.3	232.42	139.3	-154.657	139.4	-129.14
139.4	2280.19	139.6	2366.33	139.4	2159.23	139.6	1801.83	139.5	1270.71	139.4	233.427	139.4	-154.595	139.5	-129.194
139.5	2280.31	139.7	2366.43	139.5	2159.38	139.7	1802.02	139.6	1271.17	139.5	234.441	139.5	-154.54	139.6	-129.245
139.6	2280.44	139.8	2366.57	139.6	2159.51	139.8	1802.19	139.7	1271.65	139.6	235.451	139.6	-154.484	139.7	-129.281
139.7	2280.56	139.9	2366.67	139.7	2159.66	139.9	1802.36	139.8	1272.12	139.7	236.446	139.7	-154.427	139.8	-129.357
139.8	2280.66	140	2366.8	139.8	2159.79	140	1802.55	139.9	1272.62	139.8	237.458	139.8	-154.404	139.9	-129.405
139.9	2280.77	140.1	2366.91	139.9	2159.93	140.1	1802.73	140	1273.08	139.9	238.484	139.9	-154.363	140	-129.476
140	2280.88	140.2	2367.03	140	2160.05	140.2	1802.91	140.1	1273.54	140	239.466	140	-154.302	140.1	-129.523
140.1	2281.02	140.3	2367.15	140.1	2160.19	140.3	1803.12	140.2	1274.03	140.1	240.482	140.1	-154.246	140.2	-129.58
140.2	2281.15	140.4	2367.26	140.2	2160.31	140.4	1803.31	140.3	1274.52	140.2	241.492	140.2	-154.188	140.3	-129.641
140.3	2281.27	140.5	2367.42	140.3	2160.45	140.5	1803.5	140.4	1274.99	140.3	242.513	140.3	-154.118	140.4	-129.698
140.4	2281.39	140.6	2367.56	140.4	2160.62	140.6	1803.69	140.5	1275.45	140.4	243.528	140.4	-154.082	140.5	-129.764
140.5	2281.53	140.7	2367.67	140.5	2160.77	140.7	1803.86	140.6	1275.94	140.5	244.524	140.5	-154.045	140.6	-129.823
140.6	2281.67	140.8	2367.81	140.6	2160.9	140.8	1804.03	140.7	1276.4	140.6	245.551	140.6	-154.009	140.7	-129.886
140.7	2281.81	140.9	2367.93	140.7	2161.07	140.9	1804.22	140.8	1276.87	140.7	246.541	140.7	-153.977	140.8	-129.956
140.8	2281.96	141	2368.06	140.8	2161.22	141	1804.41	140.9	1277.36	140.8	247.533	140.8	-153.938	140.9	-130.019
140.9	2282.1	141.1	2368.16	140.9	2161.35	141.1	1804.59	141	1277.85	140.9	248.555	140.9	-153.914	141	-130.092
141	2282.21	141.2	2368.28	141	2161.45	141.2	1804.8	141.1	1278.35	141	249.536	141	-153.865	141.1	-130.148
141.1	2282.32	141.3	2368.37	141.1	2161.56	141.3	1804.98	141.2	1278.83	141.1	250.528	141.1	-153.837	141.2	-130.21
141.2	2282.48	141.4	2368.5	141.2	2161.68	141.4	1805.17	141.3	1279.28	141.2	251.52	141.2	-153.805	141.3	-130.272
141.3	2282.62	141.5	2368.62	141.3	2161.82	141.5	1805.35	141.4	1279.71	141.3	252.529	141.3	-153.778	141.4	-130.354
141.4	2282.74	141.6	2368.72	141.4	2161.95	141.6	1805.55	141.5	1280.18	141.4	253.531	141.4	-153.747	141.5	-130.394
141.5	2282.88	141.7	2368.81	141.5	2162.06	141.7	1805.72	141.6	1280.66	141.5	254.568	141.5	-153.712	141.6	-130.441
141.6	2282.99	141.8	2368.94	141.6	2162.22	141.8	1805.91	141.7	1281.11	141.6	255.587	141.6	-153.676	141.7	-130.475
141.7	2283.13	141.9	2369.03	141.7	2162.33	141.9	1806.09	141.8	1281.54	141.7	256.58	141.7	-153.618	141.8	-130.522
141.8	2283.27	142	2369.16	141.8	2162.44	142	1806.28	141.9	1282.01	141.8	257.602	141.8	-153.587	141.9	-130.585
141.9	2283.39	142.1	2369.24	141.9	2162.58	142.1	1806.43	142	1282.46	141.9	258.618	141.9	-153.545	142	-130.624
142	2283.55	142.2	2369.37	142	2162.72	142.2	1806.62	142.1	1282.9	142	259.611	142	-153.489	142.1	-130.667
142.1	2283.71	142.3	2369.53	142.1	2162.84	142.3	1806.79	142.2	1283.35	142.1	260.641	142.1	-153.45	142.2	-130.726
142.2	2283.86	142.4	2369.65	142.2	2162.99	142.4	1806.95	142.3	1283.8	142.2	261.67	142.2	-153.399	142.3	-130.816
142.3	2283.98	142.5	2369.78	142.3	2163.12	142.5	1807.11	142.4	1284.27	142.3	262.696	142.3	-153.355	142.4	-130.85
142.4	2284.12	142.6	2369.92	142.4	2163.27	142.6	1807.3	142.5	1284.72	142.4	263.696	142.4	-153.309	142.5	-130.905
142.5	2284.25	142.7	2370.04	142.5	2163.4	142.7	1807.47	142.6	1285.14	142.5	264.704	142.5	-153.259	142.6	-130.948
142.6	2284.39	142.8	2370.17	142.6	2163.51	142.8	1807.64	142.7	1285.59	142.6	265.735	142.6	-153.188	142.7	-131.007
142.7	2284.53	142.9	2370.33	142.7	2163.62	142.9	1807.81	142.8	1286.05	142.7	266.74	142.7	-153.122	142.8	-131.088
142.8	2284.67	143	2370.46	142.8	2163.78	143	1807.98	142.9	1286.49	142.8	267.789	142.8	-153.074	142.9	-131.128
142.9	2284.83	143.1	2370.6	142.9	2163.87	143.1	1808.14	143	1286.91	142.9	268.81	142.9	-153.001	143	-131.182
143	2284.95	143.2	2370.74	143	2163.99	143.2	1808.33	143.1	1287.36	143	269.805	143	-152.946	143.1	-131.211
143.1	2285.07	143.3	2370.83	143.1	2164.1	143.3	1808.51	143.2	1287.76	143.1	270.833	143.1	-152.899	143.2	-131.26
143.2	2285.16	143.4	2370.91	143.2	2164.2	143.4	1808.69	143.3	1288.22	143.2	271.84	143.2	-152.848	143.3	-131.323
143.3	2285.3	143.5	2371.03	143.3	2164.3	143.5	1808.88	143.4	1288.67	143.3	272.857	143.3	-152.809	143.4	-131.375
143.4	2285.44	143.6	2371.14	143.4	2164.41	143.6	1809.05	143.5	1289.11	143.4	273.864	143.4	-152.766	143.5	-131.427
143.5	2285.59	143.7	2371.24	143.5	2164.49	143.7	1809.2	143.6	1289.55	143.5	274.891	143.5	-152.705	143.6	-131.476
143.6	2285.73	143.8	2371.35	143.6	2164.58	143.8	1809.37	143.7	1289.98	143.6	275.908	143.6	-152.669	143.7	-131.523
143.7	2285.86	143.9	2371.44	143.7	2164.7	143.9	1809.53	143.8	1290.39	143.7	276.903	143.7	-152.625	143.8	-131.565
143.8	2285.99	144	2371.53	143.8	2164.81	144	1809.72	143.9	1290.86	143.8	277.892	143.8	-152.606	143.9	-131.584
143.9	2286.12	144.1	2371.67	143.9	2164.93	144.1	1809.89	144	1291.32	143.9	278.876	143.9	-152.555	144	-131.616
144	2286.24	144.2	2371.81	144	2165.06	144.2	1810.07	144.1	1291.76	144	279.872	144	-152.509	144.1	-131.698
144.1	2286.38	144.3	2371.92	144.1	2165.15	144.3	1810.22	144.2	1292.11	144.1	280.908	144.1	-152.462	144.2	-131.748
144.2	2286.51	144.4	2372.05	144.2	2165.28	144.4	1810.39	144.3	1292.53	144.2	281.926	144.2	-152.399	144.3	-131.808
144.3	2286.64	144.5	2372.2	144.3	2165.41	144.5	1810.54	144.4	1292.92	144.3	282.959	144.3	-152.341	144.4	-131.847
144.4	2286.78	144.6	2372.3	144.4	2165.55	144.6	1810.69	144.5	1293.33	144.4	283.954	144.4	-152.259	144.5	-131.898
144.5	2286.91	144.7	2372.4	144.5	2165.68	144.7	1810.87	144.6	1293.77	144.5	284.935	144.5	-152.2	144.6	-131.955
144.6	2287.02	144.8	2372.53	144.6	2165.8	144.8	1811.04	144.7	1294.21	144.6	285.934	144.6	-152.153	144.7	-131.998
144.7	2287.15	144.9	2372.66	144.7	2165.95	144.9	1811.23	144.8	1294.64	144.7	286.93	144.7	-152.091	144.8	-132.039
144.8	2287.3	145	2372.77	144.8	2166.1	145	1811.38	144.9	1295.05	144.8	287.927	144.8	-152.016	144.9	-132.105
144.9	2287.46	145.1	2372.87	144.9	2166.23	145.1	1811.49	145	1295.5	144.9	288.954	144.9	-151.955	145	-132.17
145	2287.6	145.2	2372.97	145	2166.34	145.2	1811.63	145.1	1295.94	145	289.939	145	-151.902	145.1	-132.218
145.1	2287.74	145.3	2373.09	145.1	2166.47	145.3	1811.76	145.2	1296.38	145.1	290.942	145.1	-151.86	145.2	-132.26
145.2	2287.89	145.4	2373.21	145.2	2166.6	145.4	1811.9	145.3	1296.79	145.2	291.93	145.2	-151.806	145.3	-132.296
145.3	2288.03	145.5	2373.34	145.3	2166.72	145.5	1812.03	145.4	1297.23	145.3	292.92	145.3	-151.738	145.4	-132.362
145.4	2288.17	145.6	2373.45	145.4	2166.85	145.6	1812.21	145.5	1297.66	145.4	293.919	145.4	-151.7	145.5	-132.402
145.5	2288.28	145.7	2373.56	145.5	2166.96	145.7	1812.42	145.6	1298.06	145.5	294.947	145.5	-151.664	145.6	-132.452
145.6	2288.42	145.8	2373.69	145.6	2167.12	145.8	1812.59	145.7	1298.47	145.6	295.949	145.6	-151.595	145.7	-132.503
145.7	2288.54	145.9	2373.8	145.7	2167.27	145.9	1812.78	145.8	1298.85	145.7	296.92	145.7	-151.55	145.8	-132.553
145.8	2288.65	146	2373.91	145.8	2167.4	146	1812.91	145.9	1299.25	145.8	297.93	145.8	-151.477	145.9	-132.602
145.9	2288.76	146.1	2374.02	145.9	2167.51	146.1	1813.06	146	1299.66	145.9	298.947	145.9	-151.411	146	-132.655
146	2288.88	146.2	2374.13	146	2167.61	146.2	1813.23	146.1	1300.06	146	299.966	146	-151.368	146.1	-132.713
146.1	2289.02	146.3	2374.25	146.1	2167.78	146.3	1813.38	146.2	1300.45	146.1	300.978	146.1	-151.298	146.2	-132.777
146.2	2289.13	146.4	2374.35	146.2	2167.93	146.4	1813.5	146.3	1300.85	146.2	301.988	146.2	-151.283	146.3	-132.83
146.3	2289.25	146.5	2374.42	146.3	2168.08	146.5	1813.63	146.4	1301.27	146.3	302.978	146.3	-151.254	146.4	-132.893
146.4	2289.36	146.6	2374.5	146.4	2168.24	146.6	1813.81	146.5	1301.66	146.4	303.981	146.4	-151.227	146.5	-132.941
146.5	2289.51	146.7	2374.6	146.5	2168.35	146.7	1813.97	146.6	1302.07	146.5	304.99	146.5	-151.2	146.6	-133.011
146.6	2289.65	146.8	2374.7	146.6	2168.48	146.8	1814.1	146.7	1302.5	146.6	305.986	146.6	-151.138	146.7	-133.057
146.7	2289.8	146.9	2374.79	146.7	2168.58	146.9	1814.3	146.8	1302.89	146.7	307.016	146.7	-151.091	146.8	-133.091
146.8	2289.94	147	2374.9	146.8	2168.72	147	1814.48	146.9	1303.3	146.8	308.045	146.8	-151.048	146.9	-133.125
146.9	2290.1	147.1	2375.02	146.9	2168.84	147.1	1814.64	147	1303.71	146.9	309.064	146.9	-151.028	147	-133.158
147	2290.24	147.2	2375.13	147	2168.98	147.2	1814.78	147.1	1304.12	147	310.08	147	-151.009	147.1	-133.23
[truncated: 8,142 more rows]
