# Supplementary material for: Mutational phospho-mimicry reveals a regulatory role for the XRCC4 and XLF C-terminal tails in modulating DNA bridging during classical non-homologous end joining
Source: eLife journal article supplement (doi:10.7554/elife.22900), 2017-05-13
Supplement: supp [file elife-22900-supp-v1.zip › elife_poa_e22900_Figure_8_source_data_4.txt.txt]

Time	X4-XLF_WT-WT	Time	X4-XLF_Asp-Asp	Time	X4-XLF_Ala-Ala	Time	X4-XLF_WT-Asp	Time	X4-XLF_WT-Ala	Time	X4-XLF_Asp-WT	Time	X4-XLF_Ala-WT	Time	X4-XLF_Ala-Asp	Time	X4-XLF_Asp-Ala
s	RU	s	RU	s	RU	s	RU	s	RU	s	RU	s	RU	s	RU	s	RU
-50.6	2.09454	-50.7	1.77734	-50.6	1.82813	-50.6	2.24219	-50.6	2.41797	-50.5	2.5	-50.6	2.18048	-50.6	2.13672	-50.6	2.28125
-50.5	1.92657	-50.6	1.87891	-50.5	1.96875	-50.5	2.26953	-50.5	2.42969	-50.4	2.5	-50.5	2.27032	-50.5	2.29688	-50.5	2.33984
-50.4	1.97736	-50.5	1.87891	-50.4	1.9375	-50.4	2.26953	-50.4	2.44141	-50.3	2.46875	-50.4	2.27032	-50.4	2.31641	-50.4	2.37109
-50.3	2.03595	-50.4	1.91797	-50.3	1.95703	-50.3	2.30078	-50.3	2.48047	-50.2	2.44922	-50.3	2.27032	-50.3	2.31641	-50.3	2.37891
-50.2	2.05548	-50.3	1.95703	-50.2	1.96875	-50.2	2.33203	-50.2	2.53125	-50.1	2.44922	-50.2	2.26251	-50.2	2.35547	-50.2	2.37109
-50.1	2.09454	-50.2	1.96875	-50.1	1.98828	-50.1	2.35156	-50.1	2.53906	-50	2.48047	-50.1	2.27032	-50.1	2.34766	-50.1	2.33984
-50	2.11798	-50.1	1.96875	-50	2.00781	-50	2.37891	-50	2.55859	-49.9	2.49219	-50	2.28986	-50	2.35547	-50	2.35156
-49.9	2.11798	-50	1.96875	-49.9	2.00781	-49.9	2.39063	-49.9	2.55859	-49.8	2.51172	-49.9	2.30157	-49.9	2.33594	-49.9	2.35156
-49.8	2.11798	-49.9	1.96875	-49.8	2.01953	-49.8	2.37891	-49.8	2.55859	-49.7	2.53125	-49.8	2.30939	-49.8	2.33594	-49.8	2.35938
-49.7	2.12579	-49.8	1.96875	-49.7	2.02734	-49.7	2.39844	-49.7	2.55859	-49.6	2.53125	-49.7	2.30157	-49.7	2.31641	-49.7	2.35938
-49.6	2.13751	-49.7	1.96875	-49.6	2.02734	-49.6	2.41016	-49.6	2.55859	-49.5	2.53125	-49.6	2.30939	-49.6	2.31641	-49.6	2.35938
-49.5	2.14532	-49.6	1.96875	-49.5	2.04688	-49.5	2.41016	-49.5	2.55078	-49.4	2.53125	-49.5	2.30157	-49.5	2.31641	-49.5	2.35938
-49.4	2.15704	-49.5	1.97656	-49.4	2.04688	-49.4	2.41016	-49.4	2.55859	-49.3	2.51953	-49.4	2.30157	-49.4	2.31641	-49.4	2.35938
-49.3	2.15704	-49.4	1.97656	-49.3	2.05859	-49.3	2.41016	-49.3	2.55078	-49.2	2.51953	-49.3	2.30157	-49.3	2.31641	-49.3	2.37109
-49.2	2.16486	-49.3	1.97656	-49.2	2.06641	-49.2	2.39844	-49.2	2.55078	-49.1	2.51953	-49.2	2.28204	-49.2	2.31641	-49.2	2.37891
-49.1	2.17657	-49.2	1.97656	-49.1	2.07813	-49.1	2.39063	-49.1	2.55859	-49	2.51953	-49.1	2.27032	-49.1	2.32813	-49.1	2.39063
-49	2.17657	-49.1	1.97656	-49	2.08984	-49	2.39063	-49	2.57031	-48.9	2.51953	-49	2.28204	-49	2.33594	-49	2.39063
-48.9	2.18829	-49	1.96875	-48.9	2.09766	-48.9	2.39844	-48.9	2.57813	-48.8	2.51953	-48.9	2.28204	-48.9	2.33594	-48.9	2.39063
-48.8	2.18829	-48.9	1.97656	-48.8	2.09766	-48.8	2.41016	-48.8	2.57813	-48.7	2.51953	-48.8	2.28204	-48.8	2.34766	-48.8	2.40234
-48.7	2.18829	-48.8	1.97656	-48.7	2.09766	-48.7	2.41016	-48.7	2.57813	-48.6	2.5	-48.7	2.28204	-48.7	2.34766	-48.7	2.40234
-48.6	2.18829	-48.7	1.97656	-48.6	2.10938	-48.6	2.41016	-48.6	2.58984	-48.5	2.5	-48.6	2.28204	-48.6	2.34766	-48.6	2.40234
-48.5	2.18829	-48.6	1.97656	-48.5	2.10938	-48.5	2.41016	-48.5	2.58984	-48.4	2.5	-48.5	2.28986	-48.5	2.34766	-48.5	2.41016
-48.4	2.19611	-48.5	1.97656	-48.4	2.11719	-48.4	2.41016	-48.4	2.60156	-48.3	2.5	-48.4	2.28986	-48.4	2.35547	-48.4	2.41016
-48.3	2.19611	-48.4	1.97656	-48.3	2.11719	-48.3	2.41016	-48.3	2.60156	-48.2	2.49219	-48.3	2.28986	-48.3	2.35547	-48.3	2.40234
-48.2	2.20782	-48.3	1.96875	-48.2	2.12891	-48.2	2.41016	-48.2	2.60156	-48.1	2.49219	-48.2	2.28986	-48.2	2.35547	-48.2	2.40234
-48.1	2.20782	-48.2	1.96875	-48.1	2.12891	-48.1	2.39844	-48.1	2.60938	-48	2.49219	-48.1	2.28986	-48.1	2.34766	-48.1	2.41016
-48	2.21564	-48.1	1.95703	-48	2.12891	-48	2.39063	-48	2.60938	-47.9	2.49219	-48	2.30157	-48	2.34766	-48	2.41016
-47.9	2.21564	-48	1.95703	-47.9	2.12891	-47.9	2.39063	-47.9	2.60938	-47.8	2.5	-47.9	2.30157	-47.9	2.34766	-47.9	2.41016
-47.8	2.21954	-47.9	1.95392	-47.8	2.17734	-47.8	2.34686	-47.8	2.58905	-47.7	2.54062	-47.8	2.28906	-47.8	2.36798	-47.8	2.38983
-47.7	2.19846	-47.8	1.93671	-47.7	2.2453	-47.7	2.23749	-47.7	2.57031	-47.6	2.60468	-47.7	2.27032	-47.7	2.38593	-47.7	2.34686
-47.6	2.16095	-47.7	1.90234	-47.6	2.21405	-47.6	2.15469	-47.6	2.5578	-47.5	2.62109	-47.6	2.26721	-47.6	2.36017	-47.6	2.33673
-47.5	2.09766	-47.6	1.87109	-47.5	2.20392	-47.5	2.12109	-47.5	2.52344	-47.4	2.61798	-47.5	2.2547	-47.5	2.35938	-47.5	2.32422
-47.4	2.04297	-47.5	1.84686	-47.4	2.18671	-47.4	2.09845	-47.4	2.47968	-47.3	2.61328	-47.4	2.24609	-47.4	2.33984	-47.4	2.29297
-47.3	2.01642	-47.4	1.80469	-47.3	2.15234	-47.3	2.06952	-47.3	2.43671	-47.2	2.60077	-47.3	2.23126	-47.3	2.30389	-47.3	2.28046
-47.2	1.99689	-47.3	1.75702	-47.2	2.12109	-47.2	2.04297	-47.2	2.41016	-47.1	2.57422	-47.2	2.21173	-47.2	2.29688	-47.2	2.25702
-47.1	1.97424	-47.2	1.73047	-47.1	2.11328	-47.1	2.02655	-47.1	2.39532	-47	2.5578	-47.1	2.19531	-47.1	2.29376	-47.1	2.24689
-47	1.95313	-47.1	1.71094	-47	2.09686	-47	2	-47	2.38593	-46.9	2.52814	-47	2.18048	-47	2.28436	-47	2.22266
-46.9	1.93359	-47	1.69141	-46.9	2.08514	-46.9	1.98358	-46.9	2.37579	-46.8	2.51874	-46.9	2.16565	-46.9	2.27734	-46.9	2.20313
-46.8	1.90704	-46.9	1.67499	-46.8	2.06329	-46.8	1.96564	-46.8	2.35156	-46.7	2.48749	-46.8	2.16095	-46.8	2.26953	-46.8	2.18671
-46.7	1.89221	-46.8	1.66016	-46.7	2.05389	-46.7	1.95313	-46.7	2.34686	-46.6	2.46875	-46.7	2.14844	-46.7	2.24609	-46.7	2.17188
-46.6	1.88281	-46.7	1.63281	-46.6	2.04376	-46.6	1.94141	-46.6	2.32813	-46.5	2.46564	-46.6	2.13831	-46.6	2.23828	-46.6	2.15234
-46.5	1.86798	-46.6	1.62421	-46.5	2.03436	-46.5	1.92969	-46.5	2.32813	-46.4	2.44452	-46.5	2.13361	-46.5	2.22186	-46.5	2.13281
-46.4	1.84845	-46.5	1.60626	-46.4	2.01953	-46.4	1.92499	-46.4	2.32031	-46.3	2.42657	-46.4	2.11252	-46.4	2.20392	-46.4	2.11639
-46.3	1.83203	-46.4	1.59686	-46.3	2.0047	-46.3	1.91486	-46.3	2.30389	-46.2	2.41718	-46.3	2.09845	-46.3	2.19452	-46.3	2.10156
-46.2	1.8219	-46.3	1.58203	-46.2	1.9953	-46.2	1.91016	-46.2	2.29376	-46.1	2.41016	-46.2	2.09534	-46.2	2.17969	-46.2	2.08514
-46.1	1.82031	-46.2	1.57031	-46.1	1.98047	-46.1	1.90546	-46.1	2.28436	-46	2.39532	-46.1	2.09064	-46.1	2.15625	-46.1	2.07031
-46	1.81018	-46.1	1.57501	-46	1.98047	-46	1.89844	-46	2.28595	-45.9	2.38593	-46	2.08282	-46	2.15314	-46	2.05078
-45.9	1.80783	-46	1.5625	-45.9	1.97266	-45.9	1.91016	-45.9	2.27655	-45.8	2.37891	-45.9	2.06329	-45.9	2.14063	-45.9	2.03595
-45.8	1.79065	-45.9	1.54141	-45.8	1.95313	-45.8	1.90546	-45.8	2.26642	-45.7	2.36639	-45.8	2.07111	-45.8	2.13593	-45.8	2.02655
-45.7	1.77344	-45.8	1.52423	-45.7	1.93671	-45.7	1.89532	-45.7	2.25702	-45.6	2.35626	-45.7	2.05548	-45.7	2.11719	-45.7	2.01642
-45.6	1.75159	-45.7	1.51483	-45.6	1.92188	-45.6	1.87891	-45.6	2.2453	-45.5	2.34686	-45.6	2.04688	-45.6	2.10468	-45.6	1.99921
-45.5	1.74219	-45.6	1.5047	-45.5	1.90234	-45.5	1.87421	-45.5	2.23517	-45.4	2.32813	-45.5	2.03674	-45.5	2.09454	-45.5	1.97266
-45.4	1.72736	-45.5	1.49219	-45.4	1.88281	-45.4	1.85626	-45.4	2.21405	-45.3	2.32501	-45.4	2.02734	-45.4	2.07813	-45.4	1.94452
-45.3	1.71094	-45.4	1.47577	-45.3	1.86639	-45.3	1.84686	-45.3	2.20392	-45.2	2.31561	-45.3	2.02032	-45.3	2.07343	-45.3	1.92657
-45.2	1.68909	-45.3	1.46405	-45.2	1.85626	-45.2	1.83984	-45.2	2.19452	-45.1	2.30548	-45.2	2.01251	-45.2	2.05548	-45.2	1.91718
-45.1	1.68439	-45.2	1.45703	-45.1	1.85468	-45.1	1.83984	-45.1	2.18439	-45	2.28827	-45.1	1.99609	-45.1	2.03436	-45.1	1.89063
-45	1.67969	-45.1	1.44141	-45	1.83984	-45	1.83984	-45	2.16718	-44.9	2.27814	-45	1.98596	-45	2.01563	-45	1.87891
-44.9	1.65704	-45	1.42657	-44.9	1.82343	-44.9	1.82501	-44.9	2.15234	-44.8	2.26874	-44.9	1.98126	-44.9	2.00781	-44.9	1.86798
-44.8	1.64532	-44.9	1.42188	-44.8	1.80548	-44.8	1.82031	-44.8	2.14063	-44.7	2.2453	-44.8	1.98828	-44.8	1.98828	-44.8	1.85858
-44.7	1.63751	-44.8	1.41718	-44.7	1.79608	-44.7	1.81561	-44.7	2.12421	-44.6	2.23517	-44.7	1.97345	-44.7	1.97186	-44.7	1.83203
-44.6	1.62579	-44.7	1.41016	-44.6	1.78595	-44.6	1.80859	-44.6	2.11407	-44.5	2.23047	-44.6	1.96173	-44.6	1.95703	-44.6	1.81561
-44.5	1.62268	-44.6	1.41016	-44.5	1.77655	-44.5	1.80548	-44.5	2.09766	-44.4	2.22577	-44.5	1.96173	-44.5	1.9422	-44.5	1.79767
-44.4	1.60156	-44.5	1.39844	-44.4	1.76642	-44.4	1.80078	-44.4	2.08514	-44.3	2.20782	-44.4	1.96173	-44.4	1.9328	-44.4	1.77655
-44.3	1.58673	-44.4	1.39532	-44.3	1.75702	-44.3	1.78827	-44.3	2.07813	-44.2	2.19141	-44.3	1.9469	-44.3	1.91797	-44.3	1.76642
-44.2	1.57501	-44.3	1.38593	-44.2	1.7453	-44.2	1.78125	-44.2	2.06329	-44.1	2.18671	-44.2	1.9375	-44.2	1.89844	-44.2	1.74921
-44.1	1.57031	-44.2	1.37891	-44.1	1.73517	-44.1	1.77655	-44.1	2.05389	-44	2.17657	-44.1	1.93048	-44.1	1.88361	-44.1	1.72577
-44	1.56018	-44.1	1.36407	-44	1.72577	-44	1.76642	-44	2.03906	-43.9	2.16718	-44	1.93048	-44	1.87891	-44	1.71564
-43.9	1.55548	-44	1.35938	-43.9	1.71564	-43.9	1.76172	-43.9	2.02423	-43.8	2.16016	-43.9	1.92578	-43.9	1.86249	-43.9	1.69922
-43.8	1.55078	-43.9	1.35468	-43.8	1.70624	-43.8	1.75	-43.8	2.01483	-43.7	2.15704	-43.8	1.91876	-43.8	1.84766	-43.8	1.69141
-43.7	1.54376	-43.8	1.34766	-43.7	1.69922	-43.7	1.7453	-43.7	1.9953	-43.6	2.14764	-43.7	1.91095	-43.7	1.84454	-43.7	1.67499
-43.6	1.54065	-43.7	1.33984	-43.6	1.69611	-43.6	1.73828	-43.6	1.98517	-43.5	2.12891	-43.6	1.89923	-43.6	1.83984	-43.6	1.66486
-43.5	1.53125	-43.6	1.33514	-43.5	1.68671	-43.5	1.73047	-43.5	1.96875	-43.4	2.12109	-43.5	1.89923	-43.5	1.83984	-43.5	1.66016
-43.4	1.53125	-43.5	1.32813	-43.4	1.68439	-43.4	1.72736	-43.4	1.95233	-43.3	2.12109	-43.4	1.89612	-43.4	1.82343	-43.4	1.65546
-43.3	1.52112	-43.4	1.32501	-43.3	1.67499	-43.3	1.71094	-43.3	1.93439	-43.2	2.11639	-43.3	1.88361	-43.3	1.79688	-43.3	1.64063
-43.2	1.51642	-43.3	1.32031	-43.2	1.66016	-43.2	1.72266	-43.2	1.91797	-43.1	2.11719	-43.2	1.88672	-43.2	1.78906	-43.2	1.62891
-43.1	1.51172	-43.2	1.30859	-43.1	1.64374	-43.1	1.72266	-43.1	1.91016	-43	2.11407	-43.1	1.8797	-43.1	1.76953	-43.1	1.61798
-43	1.50159	-43.1	1.30078	-43	1.63361	-43	1.72577	-43	1.89374	-42.9	2.10468	-43	1.8797	-43	1.76953	-43	1.60858
-42.9	1.49219	-43	1.28906	-42.9	1.62891	-42.9	1.71875	-42.9	1.87579	-42.8	2.09766	-42.9	1.87189	-42.9	1.76483	-42.9	1.58673
-42.8	1.48206	-42.9	1.28436	-42.8	1.63593	-42.8	1.71564	-42.8	1.85468	-42.7	2.09454	-42.8	1.87189	-42.8	1.75781	-42.8	1.58203
-42.7	1.47266	-42.8	1.27423	-42.7	1.61719	-42.7	1.71094	-42.7	1.83203	-42.6	2.08984	-42.7	1.85236	-42.7	1.7547	-42.7	1.57031
-42.6	1.45392	-42.7	1.26483	-42.6	1.62579	-42.6	1.71094	-42.6	1.80389	-42.5	2.08514	-42.6	1.84064	-42.6	1.73828	-42.6	1.56561
-42.5	1.45081	-42.6	1.26953	-42.5	1.60001	-42.5	1.70624	-42.5	1.79688	-42.4	2.07031	-42.5	1.84064	-42.5	1.73828	-42.5	1.55859
-42.4	1.44611	-42.5	1.26642	-42.4	1.59454	-42.4	1.69611	-42.4	1.79688	-42.3	2.07031	-42.4	1.83752	-42.4	1.72186	-42.4	1.57031
-42.3	1.44141	-42.4	1.25702	-42.3	1.58984	-42.3	1.67889	-42.3	1.79688	-42.2	2.05548	-42.3	1.81641	-42.3	1.71484	-42.3	1.56561
-42.2	1.43439	-42.3	1.25	-42.2	1.58514	-42.2	1.66016	-42.2	1.79688	-42.1	2.04297	-42.2	1.80157	-42.2	1.70703	-42.2	1.55548
-42.1	1.43439	-42.2	1.2453	-42.1	1.57501	-42.1	1.66016	-42.1	1.78204	-42	2.03827	-42.1	1.79688	-42.1	1.70703	-42.1	1.55078
-42	1.42657	-42.1	1.23517	-42	1.57031	-42	1.65546	-42	1.77734	-41.9	2.01953	-42	1.78986	-42	1.70392	-42	1.53906
-41.9	1.41876	-42	1.23047	-41.9	1.56561	-41.9	1.63751	-41.9	1.76953	-41.8	2.01953	-41.9	1.77814	-41.9	1.69922	-41.9	1.53906
-41.8	1.40704	-41.9	1.23047	-41.8	1.54688	-41.8	1.62811	-41.8	1.76953	-41.7	2.00702	-41.8	1.77502	-41.8	1.6875	-41.8	1.53125
-41.7	1.40234	-41.8	1.22577	-41.7	1.54376	-41.7	1.62109	-41.7	1.75311	-41.6	1.98828	-41.7	1.75781	-41.7	1.67969	-41.7	1.53125
-41.6	1.39221	-41.7	1.21875	-41.6	1.53436	-41.6	1.62109	-41.6	1.73828	-41.5	2	-41.6	1.75079	-41.6	1.66797	-41.6	1.51953
-41.5	1.38751	-41.6	1.20392	-41.5	1.52423	-41.5	1.60626	-41.5	1.73828	-41.4	1.99689	-41.5	1.73907	-41.5	1.66797	-41.5	1.53125
-41.4	1.38751	-41.5	1.19922	-41.4	1.50702	-41.4	1.59686	-41.4	1.72345	-41.3	1.98047	-41.4	1.73907	-41.4	1.66327	-41.4	1.51953
-41.3	1.38751	-41.4	1.19922	-41.3	1.48828	-41.3	1.58984	-41.3	1.71875	-41.2	1.97266	-41.3	1.73596	-41.3	1.65625	-41.3	1.51483
-41.2	1.38751	-41.3	1.19141	-41.2	1.48358	-41.2	1.58984	-41.2	1.71094	-41.1	1.95624	-41.2	1.73126	-41.2	1.65314	-41.2	1.50781
-41.1	1.38751	-41.2	1.19141	-41.1	1.47345	-41.1	1.58514	-41.1	1.69922	-41	1.95392	-41.1	1.71875	-41.1	1.65546	-41.1	1.5047
-41	1.38751	-41.1	1.19141	-41	1.46875	-41	1.57501	-41	1.69141	-40.9	1.96094	-41	1.71954	-41	1.63672	-41	1.5
-40.9	1.38751	-41	1.17499	-40.9	1.48047	-40.9	1.56561	-40.9	1.67969	-40.8	1.96094	-40.9	1.72424	-40.9	1.63361	-40.9	1.50781
-40.8	1.38281	-40.9	1.16797	-40.8	1.48047	-40.8	1.55548	-40.8	1.67499	-40.7	1.94922	-40.8	1.73126	-40.8	1.62421	-40.8	1.50702
-40.7	1.37579	-40.8	1.16797	-40.7	1.48047	-40.7	1.53906	-40.7	1.65625	-40.6	1.93671	-40.7	1.73126	-40.7	1.61719	-40.7	1.5
-40.6	1.37579	-40.7	1.16486	-40.6	1.47577	-40.6	1.53436	-40.6	1.66095	-40.5	1.92969	-40.6	1.72345	-40.6	1.61719	-40.6	1.48828
-40.5	1.37579	-40.6	1.15546	-40.5	1.46564	-40.5	1.52423	-40.5	1.65546	-40.4	1.92657	-40.5	1.71173	-40.5	1.61407	-40.5	1.48517
-40.4	1.37268	-40.5	1.14063	-40.4	1.44452	-40.4	1.51172	-40.4	1.65625	-40.3	1.92188	-40.4	1.71173	-40.4	1.60938	-40.4	1.46094
-40.3	1.36798	-40.4	1.14063	-40.3	1.4375	-40.3	1.5	-40.3	1.65625	-40.2	1.92188	-40.3	1.70392	-40.3	1.60938	-40.3	1.46094
-40.2	1.35156	-40.3	1.13593	-40.2	1.4375	-40.2	1.4953	-40.2	1.64532	-40.1	1.91016	-40.2	1.6922	-40.2	1.60938	-40.2	1.46405
-40.1	1.34454	-40.2	1.12579	-40.1	1.43439	-40.1	1.47736	-40.1	1.64063	-40	1.90234	-40.1	1.6922	-40.1	1.60156	-40.1	1.46875
-40	1.34454	-40.1	1.11719	-40	1.42188	-40	1.46796	-40	1.64063	-39.9	1.89063	-40	1.6875	-40	1.59686	-40	1.46875
-39.9	1.34454	-40	1.12421	-39.9	1.40546	-39.9	1.46094	-39.9	1.62891	-39.8	1.88593	-39.9	1.66876	-39.9	1.59454	-39.9	1.46564
-39.8	1.34454	-39.9	1.11719	-39.8	1.39063	-39.8	1.46094	-39.8	1.62891	-39.7	1.87579	-39.8	1.66565	-39.8	1.59686	-39.8	1.46094
-39.7	1.34143	-39.8	1.11719	-39.7	1.36719	-39.7	1.45624	-39.7	1.62891	-39.6	1.88281	-39.7	1.64844	-39.7	1.57813	-39.7	1.45313
-39.6	1.33673	-39.7	1.11407	-39.6	1.36719	-39.6	1.44611	-39.6	1.63202	-39.5	1.87109	-39.6	1.63831	-39.6	1.57813	-39.6	1.45624
-39.5	1.32892	-39.6	1.10938	-39.5	1.35468	-39.5	1.44141	-39.5	1.63672	-39.4	1.87109	-39.5	1.61719	-39.5	1.57343	-39.5	1.46094
-39.4	1.33203	-39.5	1.09686	-39.4	1.35236	-39.4	1.43671	-39.4	1.62891	-39.3	1.88281	-39.4	1.60547	-39.4	1.56329	-39.4	1.45392
-39.3	1.33673	-39.4	1.08673	-39.3	1.35156	-39.3	1.42969	-39.3	1.62189	-39.2	1.87109	-39.3	1.59534	-39.3	1.55859	-39.3	1.45624
-39.2	1.33673	-39.3	1.07733	-39.2	1.32813	-39.2	1.44687	-39.2	1.63202	-39.1	1.87109	-39.2	1.59064	-39.2	1.55859	-39.2	1.45392
-39.1	1.34454	-39.2	1.08282	-39.1	1.32813	-39.1	1.48047	-39.1	1.64142	-39	1.8703	-39.1	1.59064	-39.1	1.55859	-39.1	1.45703
-39	1.35626	-39.1	1.10468	-39	1.33984	-39	1.48358	-39	1.64063	-38.9	1.88672	-39	1.58594	-39	1.57813	-39	1.46094
-38.9	1.35626	-39	1.10236	-38.9	1.32813	-38.9	1.48517	-38.9	1.64453	-38.8	1.89844	-38.9	1.5961	-38.9	1.57813	-38.9	1.46564
-38.8	1.35626	-38.9	1.11719	-38.8	1.32813	-38.8	1.48047	-38.8	1.67267	-38.7	1.89844	-38.8	1.61719	-38.8	1.57031	-38.8	1.46094
-38.7	1.36407	-38.8	1.13361	-38.7	1.32343	-38.7	1.47577	-38.7	1.67108	-38.6	1.90781	-38.7	1.62189	-38.7	1.55859	-38.7	1.46094
-38.6	1.37579	-38.7	1.14844	-38.6	1.31329	-38.6	1.49689	-38.6	1.68048	-38.5	1.92499	-38.6	1.60706	-38.6	1.55859	-38.6	1.48047
-38.5	1.38049	-38.6	1.16327	-38.5	1.32031	-38.5	1.56641	-38.5	1.69061	-38.4	1.92267	-38.5	1.59766	-38.5	1.54688	-38.5	1.5
-38.4	1.38361	-38.5	1.18439	-38.4	1.31329	-38.4	1.60626	-38.4	1.71954	-38.3	1.92188	-38.4	1.57031	-38.4	1.54688	-38.4	1.5
-38.3	1.40784	-38.4	1.17578	-38.3	1.31952	-38.3	1.70859	-38.3	1.75861	-38.2	1.93048	-38.3	1.52112	-38.3	1.54999	-38.3	1.50311
-38.2	1.45001	-38.3	1.14764	-38.2	1.34454	-38.2	1.76874	-38.2	1.77264	-38.1	1.98907	-38.2	1.46017	-38.2	1.54376	-38.2	1.54453
-38.1	1.48987	-38.2	1.14532	-38.1	1.31561	-38.1	1.72656	-38.1	1.75	-38	2.01483	-38.1	1.39063	-38.1	1.51874	-38.1	1.62109
-38	1.3797	-38.1	1.12735	-38	1.26563	-38	1.50702	-38	1.67499	-37.9	1.8125	-38	1.32971	-38	1.46094	-38	1.43829
-37.9	1.0961	-38	1.03046	-37.9	1.14218	-37.9	1.13126	-37.9	1.55313	-37.8	1.49374	-37.9	1.29297	-37.9	1.38907	-37.9	1.11954
-37.8	0.846893	-37.9	0.857025	-37.8	0.947662	-37.8	0.939056	-37.8	1.35703	-37.7	1.31952	-37.8	1.23828	-37.8	1.25702	-37.8	0.943756
-37.7	0.682831	-37.8	0.674988	-37.7	0.779694	-37.7	0.860168	-37.7	1.17578	-37.6	1.20703	-37.7	1.20081	-37.7	1.13983	-37.7	0.811707
-37.6	0.650787	-37.7	0.580475	-37.6	0.667969	-37.6	0.903137	-37.6	1.08438	-37.5	1.16797	-37.6	1.16406	-37.6	1.07266	-37.6	0.71405
-37.5	0.707825	-37.6	0.516418	-37.5	0.632813	-37.5	0.941406	-37.5	1.00861	-37.4	1.22736	-37.5	1.12189	-37.5	1.05624	-37.5	0.7547
-37.4	0.790649	-37.5	0.563293	-37.4	0.689056	-37.4	1.02109	-37.4	1.04218	-37.3	1.30939	-37.4	1.12189	-37.4	1.09686	-37.4	0.828918
-37.3	0.857819	-37.4	0.649231	-37.3	0.746094	-37.3	1.07813	-37.3	1.08673	-37.2	1.3797	-37.3	1.13281	-37.3	1.14218	-37.3	0.892181
-37.2	0.903137	-37.3	0.695313	-37.2	0.773438	-37.2	1.10547	-37.2	1.1297	-37.1	1.44531	-37.2	1.16956	-37.2	1.17889	-37.2	0.952332
-37.1	0.935181	-37.2	0.731262	-37.1	0.809387	-37.1	1.14142	-37.1	1.16406	-37	1.49689	-37.1	1.21252	-37.1	1.22421	-37.1	0.985931
-37	0.981262	-37.1	0.765625	-37	0.835938	-37	1.17969	-37	1.20313	-36.9	1.55157	-37	1.23907	-37	1.26093	-37	1.02264
-36.9	1.0094	-37	0.808594	-36.9	0.882813	-36.9	1.1875	-36.9	1.23126	-36.8	1.58124	-36.9	1.24768	-36.9	1.28986	-36.9	1.06329
-36.8	1.01953	-36.9	0.816406	-36.8	0.90625	-36.8	1.20392	-36.8	1.24609	-36.7	1.60236	-36.8	1.24609	-36.8	1.31641	-36.8	1.09766
-36.7	1.02893	-36.8	0.832825	-36.7	0.922668	-36.7	1.19922	-36.7	1.2547	-36.6	1.60938	-36.7	1.25861	-36.7	1.33282	-36.7	1.12579
-36.6	1.02814	-36.7	0.839844	-36.6	0.917969	-36.6	1.19922	-36.6	1.24139	-36.5	1.62891	-36.6	1.27032	-36.6	1.33984	-36.6	1.14063
-36.5	1.01642	-36.6	0.839844	-36.5	0.925781	-36.5	1.19141	-36.5	1.23828	-36.4	1.64063	-36.5	1.27502	-36.5	1.32813	-36.5	1.14844
-36.4	1.01953	-36.5	0.839844	-36.4	0.9422	-36.4	1.19141	-36.4	1.22656	-36.3	1.64532	-36.4	1.28516	-36.4	1.33984	-36.4	1.16486
-36.3	1.02423	-36.4	0.842957	-36.3	0.952332	-36.3	1.19141	-36.3	1.22656	-36.2	1.65234	-36.3	1.27814	-36.3	1.33124	-36.3	1.17499
-36.2	1.02423	-36.3	0.864075	-36.2	0.949219	-36.2	1.19141	-36.2	1.22345	-36.1	1.65546	-36.2	1.27032	-36.2	1.33594	-36.2	1.17969
-36.1	1.02893	-36.2	0.871094	-36.1	0.946106	-36.1	1.19141	-36.1	1.23358	-36	1.65625	-36.1	1.27502	-36.1	1.34064	-36.1	1.18439
-36	1.04376	-36.1	0.871094	-36	0.944519	-36	1.19452	-36	1.23126	-35.9	1.6875	-36	1.27032	-36	1.34766	-36	1.19922
-35.9	1.05859	-36	0.878906	-35.9	0.957031	-35.9	1.20392	-35.9	1.24139	-35.8	1.70392	-35.9	1.26251	-35.9	1.34766	-35.9	1.22345
-35.8	1.07266	-35.9	0.882019	-35.8	0.961731	-35.8	1.21094	-35.8	1.24298	-35.7	1.71875	-35.8	1.26251	-35.8	1.34766	-35.8	1.25311
-35.7	1.08673	-35.8	0.891418	-35.7	0.983582	-35.7	1.21405	-35.7	1.26251	-35.6	1.73047	-35.7	1.26563	-35.7	1.34766	-35.7	1.27423
-35.6	1.09845	-35.7	0.914856	-35.6	0.992981	-35.6	1.20703	-35.6	1.26953	-35.5	1.73517	-35.6	1.26331	-35.6	1.34766	-35.6	1.28906
-35.5	1.08984	-35.6	0.924988	-35.5	1.00781	-35.5	1.20703	-35.5	1.25311	-35.4	1.7453	-35.5	1.27502	-35.5	1.34296	-35.5	1.30078
-35.4	1.09924	-35.5	0.9375	-35.4	1.03204	-35.4	1.21173	-35.4	1.25781	-35.3	1.75	-35.4	1.28516	-35.4	1.35236	-35.4	1.30389
-35.3	1.10626	-35.4	0.953918	-35.3	1.04218	-35.3	1.21875	-35.3	1.25781	-35.2	1.74609	-35.3	1.29456	-35.3	1.34766	-35.3	1.31329
-35.2	1.10938	-35.3	0.96405	-35.2	1.04688	-35.2	1.22345	-35.2	1.25781	-35.1	1.76251	-35.2	1.29376	-35.2	1.34766	-35.2	1.32031
-35.1	1.11407	-35.2	0.96875	-35.1	1.03906	-35.1	1.2453	-35.1	1.25781	-35	1.76953	-35.1	1.30469	-35.1	1.35236	-35.1	1.32031
-35	1.11407	-35.1	0.96875	-35	1.04688	-35	1.25	-35	1.25781	-34.9	1.76172	-35	1.30627	-35	1.35938	-35	1.32813
-34.9	1.09924	-35	0.965637	-34.9	1.05157	-34.9	1.2547	-34.9	1.25781	-34.8	1.76172	-34.9	1.31329	-34.9	1.35156	-34.9	1.33984
-34.8	1.08673	-34.9	0.960938	-34.8	1.07031	-34.8	1.25702	-34.8	1.26251	-34.7	1.75391	-34.8	1.31329	-34.8	1.35468	-34.8	1.32813
-34.7	1.08984	-34.8	0.960938	-34.7	1.07343	-34.7	1.23828	-34.7	1.27264	-34.6	1.73749	-34.7	1.31329	-34.7	1.35938	-34.7	1.32501
-34.6	1.07501	-34.7	0.96405	-34.6	1.08282	-34.6	1.23828	-34.6	1.27734	-34.5	1.72266	-34.6	1.29688	-34.6	1.35626	-34.6	1.31561
-34.5	1.07501	-34.6	0.953918	-34.5	1.08124	-34.5	1.23828	-34.5	1.27734	-34.4	1.70782	-34.5	1.28674	-34.5	1.33514	-34.5	1.30859
-34.4	1.07501	-34.5	0.960938	-34.4	1.08594	-34.4	1.23828	-34.4	1.28204	-34.3	1.70313	-34.4	1.27423	-34.4	1.33282	-34.4	1.30859
-34.3	1.07501	-34.4	0.960938	-34.3	1.08594	-34.3	1.25	-34.3	1.28906	-34.2	1.67889	-34.3	1.26953	-34.3	1.32343	-34.3	1.30389
-34.2	1.06018	-34.3	0.960938	-34.2	1.07501	-34.2	1.23828	-34.2	1.28906	-34.1	1.65546	-34.2	1.25079	-34.2	1.31641	-34.2	1.29688
-34.1	1.05078	-34.2	0.96875	-34.1	1.07031	-34.1	1.23828	-34.1	1.28906	-34	1.64532	-34.1	1.25079	-34.1	1.30859	-34.1	1.29376
-34	1.05548	-34.1	0.96405	-34	1.07031	-34	1.25	-34	1.28906	-33.9	1.62811	-34	1.25079	-34	1.30389	-34	1.29608
-33.9	1.0672	-34	0.965637	-33.9	1.07813	-33.9	1.25	-33.9	1.29218	-33.8	1.60938	-33.9	1.25079	-33.9	1.29376	-33.9	1.28595
-33.8	1.0672	-33.9	0.960938	-33.8	1.07343	-33.8	1.23828	-33.8	1.29688	-33.7	1.60626	-33.8	1.25079	-33.8	1.28906	-33.8	1.28125
-33.7	1.0719	-33.8	0.972656	-33.7	1.06641	-33.7	1.23828	-33.7	1.30157	-33.6	1.58984	-33.7	1.25079	-33.7	1.28436	-33.7	1.27655
-33.6	1.07892	-33.7	0.980469	-33.6	1.06641	-33.6	1.23828	-33.6	1.29688	-33.5	1.58514	-33.6	1.25079	-33.6	1.27734	-33.6	1.26953
-33.5	1.0672	-33.6	0.980469	-33.5	1.06329	-33.5	1.23828	-33.5	1.29688	-33.4	1.57031	-33.5	1.23907	-33.5	1.26251	-33.5	1.26642
-33.4	1.0672	-33.5	0.987488	-33.4	1.05859	-33.4	1.23517	-33.4	1.29218	-33.3	1.57031	-33.4	1.23596	-33.4	1.25781	-33.4	1.25
-33.3	1.0625	-33.4	0.980469	-33.3	1.05859	-33.3	1.23047	-33.3	1.28516	-33.2	1.5672	-33.3	1.23126	-33.3	1.25	-33.3	1.2453
-33.2	1.06018	-33.3	0.983582	-33.2	1.05859	-33.2	1.23047	-33.2	1.28204	-33.1	1.5625	-33.2	1.24298	-33.2	1.25	-33.2	1.23828
-33.1	1.0672	-33.2	0.97345	-33.1	1.05859	-33.1	1.23047	-33.1	1.27734	-33	1.54608	-33.1	1.23828	-33.1	1.23828	-33.1	1.23828
-33	1.0672	-33.1	0.980469	-33	1.07343	-33	1.23047	-33	1.28046	-32.9	1.53906	-33	1.21954	-33	1.23828	-33	1.23517
-32.9	1.05078	-33	0.980469	-32.9	1.07813	-32.9	1.23047	-32.9	1.27734	-32.8	1.53125	-32.9	1.21954	-32.9	1.23828	-32.9	1.22577
-32.8	1.04376	-32.9	0.975769	-32.8	1.07813	-32.8	1.23047	-32.8	1.28204	-32.7	1.51953	-32.8	1.21173	-32.8	1.23047	-32.8	1.23047
-32.7	1.05078	-32.8	0.96875	-32.7	1.08594	-32.7	1.22577	-32.7	1.28906	-32.6	1.50702	-32.7	1.21173	-32.7	1.21875	-32.7	1.22577
-32.6	1.04376	-32.7	0.965637	-32.6	1.08282	-32.6	1.21875	-32.6	1.27734	-32.5	1.49689	-32.6	1.21484	-32.6	1.21405	-32.6	1.21564
-32.5	1.04065	-32.6	0.960938	-32.5	1.07813	-32.5	1.21875	-32.5	1.28204	-32.4	1.48047	-32.5	1.1969	-32.5	1.20703	-32.5	1.19452
-32.4	1.03595	-32.5	0.956238	-32.4	1.07343	-32.4	1.21875	-32.4	1.28906	-32.3	1.48047	-32.4	1.19531	-32.4	1.19531	-32.4	1.18439
-32.3	1.03595	-32.4	0.949219	-32.3	1.06641	-32.3	1.21875	-32.3	1.28906	-32.2	1.47266	-32.3	1.1969	-32.3	1.1922	-32.3	1.17969
-32.2	1.02423	-32.3	0.949219	-32.2	1.06641	-32.2	1.21875	-32.2	1.28125	-32.1	1.46796	-32.2	1.1922	-32.2	1.17969	-32.2	1.17499
-32.1	1.03125	-32.2	0.949219	-32.1	1.05859	-32.1	1.21875	-32.1	1.28125	-32	1.44922	-32.1	1.1922	-32.1	1.17969	-32.1	1.16797
-32	1.02423	-32.1	0.949219	-32	1.05859	-32	1.21875	-32	1.28125	-31.9	1.4375	-32	1.1922	-32	1.17499	-32	1.16797
-31.9	1.03284	-32	0.949219	-31.9	1.05859	-31.9	1.21875	-31.9	1.26953	-31.8	1.43439	-31.9	1.1922	-31.9	1.16095	-31.9	1.16486
-31.8	1.02344	-31.9	0.949219	-31.8	1.06641	-31.8	1.21875	-31.8	1.26953	-31.7	1.42188	-31.8	1.18048	-31.8	1.15546	-31.8	1.17188
-31.7	1.01331	-31.8	0.946106	-31.7	1.06641	-31.7	1.21405	-31.7	1.26483	-31.6	1.41718	-31.7	1.18048	-31.7	1.14844	-31.7	1.16718
-31.6	1.00861	-31.7	0.944519	-31.6	1.06641	-31.6	1.20703	-31.6	1.25781	-31.5	1.39844	-31.6	1.17267	-31.6	1.13672	-31.6	1.16016
-31.5	1.00391	-31.6	0.9375	-31.5	1.05859	-31.5	1.20392	-31.5	1.25781	-31.4	1.38751	-31.5	1.17267	-31.5	1.12891	-31.5	1.15546
-31.4	1.00159	-31.5	0.934387	-31.4	1.05859	-31.4	1.19452	-31.4	1.25781	-31.3	1.37811	-31.4	1.16797	-31.4	1.12891	-31.4	1.14532
-31.3	0.992188	-31.4	0.924988	-31.3	1.04688	-31.3	1.18439	-31.3	1.25	-31.2	1.35938	-31.3	1.16095	-31.3	1.11407	-31.3	1.14063
-31.2	0.985168	-31.3	0.910156	-31.2	1.03906	-31.2	1.17499	-31.2	1.25781	-31.1	1.35156	-31.2	1.14612	-31.2	1.10938	-31.2	1.12421
-31.1	0.980469	-31.2	0.898438	-31.1	1.03906	-31.1	1.16797	-31.1	1.25	-31	1.33984	-31.1	1.14142	-31.1	1.10938	-31.1	1.11407
-31	0.970337	-31.1	0.893738	-31	1.03906	-31	1.16797	-31	1.25	-30.9	1.33203	-31	1.13361	-31	1.10156	-31	1.10938
-30.9	0.965637	-31	0.883606	-30.9	1.02734	-30.9	1.16486	-30.9	1.2453	-30.8	1.3125	-30.9	1.13361	-30.9	1.10156	-30.9	1.09686
-30.8	0.965637	-30.9	0.874207	-30.8	1.02423	-30.8	1.16016	-30.8	1.23828	-30.7	1.31561	-30.8	1.13361	-30.8	1.10156	-30.8	1.08673
-30.7	0.965637	-30.8	0.864075	-30.7	1.01953	-30.7	1.16016	-30.7	1.22656	-30.6	1.30078	-30.7	1.12189	-30.7	1.08984	-30.7	1.08203
-30.6	0.977356	-30.7	0.854675	-30.6	1.00702	-30.6	1.16016	-30.6	1.22656	-30.5	1.30078	-30.6	1.12189	-30.6	1.07343	-30.6	1.07733
-30.5	0.977356	-30.6	0.847656	-30.5	0.988281	-30.5	1.16016	-30.5	1.22656	-30.4	1.29376	-30.5	1.12189	-30.5	1.06329	-30.5	1.07031
-30.4	0.977356	-30.5	0.847656	-30.4	0.988281	-30.4	1.15546	-30.4	1.21484	-30.3	1.28827	-30.4	1.12189	-30.4	1.07031	-30.4	1.0672
-30.3	0.977356	-30.4	0.847656	-30.3	0.983582	-30.3	1.14844	-30.3	1.20703	-30.2	1.28125	-30.3	1.12189	-30.3	1.05389	-30.3	1.0625
-30.2	0.977356	-30.3	0.844543	-30.2	0.976563	-30.2	1.13751	-30.2	1.20703	-30.1	1.26953	-30.2	1.11719	-30.2	1.04376	-30.2	1.05078
-30.1	0.980469	-30.2	0.839844	-30.1	0.97345	-30.1	1.12811	-30.1	1.19531	-30	1.2547	-30.1	1.10236	-30.1	1.04608	-30.1	1.05078
-30	0.97345	-30.1	0.846863	-30	0.960938	-30	1.12109	-30	1.1922	-29.9	1.25311	-30	1.08752	-30	1.03906	-30	1.04297
-29.9	0.97345	-30	0.828125	-29.9	0.956238	-29.9	1.12109	-29.9	1.1875	-29.8	1.24689	-29.9	1.08282	-29.9	1.02734	-29.9	1.03827
-29.8	0.97345	-29.9	0.828125	-29.8	0.9422	-29.8	1.10938	-29.8	1.17969	-29.7	1.24219	-29.8	1.07813	-29.8	1.01953	-29.8	1.01953
-29.7	0.970337	-29.8	0.828125	-29.7	0.944519	-29.7	1.10468	-29.7	1.17969	-29.6	1.23047	-29.7	1.05939	-29.7	1.00781	-29.7	1.01953
-29.6	0.980469	-29.7	0.823425	-29.6	0.934387	-29.6	1.09766	-29.6	1.16327	-29.5	1.23047	-29.6	1.04846	-29.6	1.00781	-29.6	1.01483
-29.5	0.985168	-29.6	0.816406	-29.5	0.924988	-29.5	1.09454	-29.5	1.16095	-29.4	1.21796	-29.5	1.04376	-29.5	1.0047	-29.5	1.0047
-29.4	0.985168	-29.5	0.825012	-29.4	0.917969	-29.4	1.08203	-29.4	1.16797	-29.3	1.21564	-29.4	1.02734	-29.4	1	-29.4	0.992188
-29.3	0.982056	-29.4	0.820313	-29.3	0.914856	-29.3	1.06561	-29.3	1.16016	-29.2	1.21094	-29.3	1.02502	-29.3	0.988281	-29.3	0.992188
-29.2	0.977356	-29.3	0.820313	-29.2	0.921875	-29.2	1.05548	-29.2	1.14844	-29.1	1.20313	-29.2	1.02734	-29.2	0.980469	-29.2	0.992188
-29.1	0.972656	-29.2	0.820313	-29.1	0.917175	-29.1	1.05078	-29.1	1.14844	-29	1.19141	-29.1	1.01721	-29.1	0.980469	-29.1	0.980469
-29	0.965637	-29.1	0.820313	-29	0.898438	-29	1.03906	-29	1.14063	-28.9	1.18359	-29	1.02423	-29	0.96875	-29	0.980469
-28.9	0.965637	-29	0.820313	-28.9	0.898438	-28.9	1.03125	-28.9	1.14063	-28.8	1.19452	-28.9	1.01251	-28.9	0.956238	-28.9	0.967957
-28.8	0.962524	-28.9	0.820313	-28.8	0.910156	-28.8	1.03125	-28.8	1.12891	-28.7	1.19922	-28.8	1.01251	-28.8	0.9375	-28.8	0.960938
-28.7	0.957825	-28.8	0.808594	-28.7	0.910156	-28.7	1.01953	-28.7	1.12891	-28.6	1.19141	-28.7	1.00781	-28.7	0.929688	-28.7	0.949219
-28.6	0.957825	-28.7	0.808594	-28.6	0.907043	-28.6	1.01483	-28.6	1.12891	-28.5	1.17969	-28.6	1.01251	-28.6	0.917969	-28.6	0.953918
-28.5	0.941406	-28.6	0.808594	-28.5	0.902344	-28.5	1	-28.5	1.12891	-28.4	1.17657	-28.5	1.00079	-28.5	0.917969	-28.5	0.960938
-28.4	0.934387	-28.5	0.803894	-28.4	0.890625	-28.4	1	-28.4	1.11719	-28.3	1.16327	-28.4	0.989075	-28.4	0.898438	-28.4	0.949219
-28.3	0.934387	-28.4	0.808594	-28.3	0.890625	-28.3	1	-28.3	1.11719	-28.2	1.15704	-28.3	0.981262	-28.3	0.891418	-28.3	0.941406
-28.2	0.929688	-28.3	0.805481	-28.2	0.890625	-28.2	1	-28.2	1.11719	-28.1	1.15234	-28.2	0.981262	-28.2	0.890625	-28.2	0.941406
-28.1	0.922668	-28.2	0.800781	-28.1	0.893738	-28.1	0.988281	-28.1	1.11719	-28	1.14374	-28.1	0.969543	-28.1	0.882019	-28.1	0.941406
-28	0.922668	-28.1	0.789063	-28	0.898438	-28	0.988281	-28	1.11249	-27.9	1.13751	-28	0.961731	-28	0.878906	-28	0.941406
-27.9	0.922668	-28	0.789063	-27.9	0.898438	-27.9	0.977356	-27.9	1.10547	-27.8	1.12109	-27.9	0.961731	-27.9	0.864075	-27.9	0.941406
-27.8	0.922668	-27.9	0.784363	-27.8	0.886719	-27.8	0.972656	-27.8	1.10547	-27.7	1.12109	-27.8	0.950012	-27.8	0.851563	-27.8	0.929688
-27.7	0.922668	-27.8	0.789063	-27.7	0.883606	-27.7	0.960938	-27.7	1.09766	-27.6	1.12109	-27.7	0.950012	-27.7	0.835144	-27.7	0.929688
-27.6	0.934387	-27.7	0.789063	-27.6	0.878906	-27.6	0.960938	-27.6	1.09766	-27.5	1.12421	-27.6	0.9422	-27.6	0.821106	-27.6	0.929688
-27.5	0.934387	-27.6	0.774231	-27.5	0.871094	-27.5	0.948425	-27.5	1.09766	-27.4	1.12891	-27.5	0.954712	-27.5	0.820313	-27.5	0.921875
-27.4	0.931274	-27.5	0.769531	-27.4	0.871094	-27.4	0.929688	-27.4	1.10236	-27.3	1.12109	-27.4	0.957031	-27.4	0.823425	-27.4	0.921875
-27.3	0.914856	-27.4	0.769531	-27.3	0.871094	-27.3	0.917969	-27.3	1.09766	-27.2	1.12579	-27.3	0.961731	-27.3	0.816406	-27.3	0.924988
-27.2	0.910156	-27.3	0.772644	-27.2	0.871094	-27.2	0.907043	-27.2	1.09296	-27.1	1.13281	-27.2	0.950012	-27.2	0.808594	-27.2	0.917969
-27.1	0.900024	-27.2	0.777344	-27.1	0.871094	-27.1	0.902344	-27.1	1.07813	-27	1.13281	-27.1	0.950012	-27.1	0.808594	-27.1	0.917969
-27	0.895325	-27.1	0.777344	-27	0.871094	-27	0.890625	-27	1.07501	-26.9	1.11639	-27	0.950012	-27	0.813293	-27	0.917969
-26.9	0.895325	-27	0.782043	-26.9	0.871094	-26.9	0.890625	-26.9	1.05859	-26.8	1.10236	-26.9	0.9422	-26.9	0.823425	-26.9	0.910156
-26.8	0.890625	-26.9	0.784363	-26.8	0.874207	-26.8	0.882813	-26.8	1.05859	-26.7	1.10468	-26.8	0.935181	-26.8	0.828125	-26.8	0.898438
-26.7	0.883606	-26.8	0.777344	-26.7	0.878906	-26.7	0.874207	-26.7	1.05859	-26.6	1.08984	-26.7	0.930481	-26.7	0.816406	-26.7	0.898438
-26.6	0.883606	-26.7	0.777344	-26.6	0.878906	-26.6	0.871094	-26.6	1.05859	-26.5	1.08984	-26.6	0.922668	-26.6	0.813293	-26.6	0.903137
-26.5	0.883606	-26.6	0.774231	-26.5	0.878906	-26.5	0.875793	-26.5	1.05859	-26.4	1.09454	-26.5	0.922668	-26.5	0.811707	-26.5	0.902344
-26.4	0.883606	-26.5	0.769531	-26.4	0.867188	-26.4	0.871094	-26.4	1.05859	-26.3	1.10156	-26.4	0.925781	-26.4	0.813293	-26.4	0.890625
-26.3	0.883606	-26.4	0.769531	-26.3	0.867188	-26.3	0.863281	-26.3	1.05859	-26.2	1.10468	-26.3	0.918762	-26.3	0.811707	-26.3	0.878906
-26.2	0.883606	-26.3	0.769531	-26.2	0.859375	-26.2	0.851563	-26.2	1.05859	-26.1	1.09454	-26.2	0.91095	-26.2	0.821106	-26.2	0.878906
-26.1	0.875793	-26.2	0.761719	-26.1	0.856262	-26.1	0.842957	-26.1	1.05859	-26	1.08984	-26.1	0.915649	-26.1	0.820313	-26.1	0.878906
-26	0.875793	-26.1	0.764832	-26	0.851563	-26	0.839844	-26	1.05859	-25.9	1.08203	-26	0.922668	-26	0.816406	-26	0.878906
-25.9	0.872681	-26	0.769531	-25.9	0.846863	-25.9	0.839844	-25.9	1.05078	-25.8	1.07343	-25.9	0.91095	-25.9	0.828125	-25.9	0.878906
-25.8	0.867981	-25.9	0.777344	-25.8	0.828125	-25.8	0.839844	-25.8	1.05078	-25.7	1.07031	-25.8	0.91095	-25.8	0.832825	-25.8	0.871094
-25.7	0.867981	-25.8	0.769531	-25.7	0.828125	-25.7	0.825012	-25.7	1.03906	-25.6	1.07501	-25.7	0.914063	-25.7	0.842957	-25.7	0.875793
-25.6	0.863281	-25.7	0.769531	-25.6	0.828125	-25.6	0.823425	-25.6	1.03906	-25.5	1.07031	-25.6	0.923462	-25.6	0.864075	-25.6	0.882813
-25.5	0.856262	-25.6	0.769531	-25.5	0.832825	-25.5	0.820313	-25.5	1.03906	-25.4	1.07031	-25.5	0.930481	-25.5	0.859375	-25.5	0.871094
-25.4	0.856262	-25.5	0.769531	-25.4	0.839844	-25.4	0.808594	-25.4	1.03906	-25.3	1.07501	-25.4	0.930481	-25.4	0.862488	-25.4	0.871094
-25.3	0.841431	-25.4	0.757813	-25.3	0.842957	-25.3	0.813293	-25.3	1.03125	-25.2	1.09686	-25.3	0.930481	-25.3	0.867188	-25.3	0.871094
-25.2	0.839844	-25.3	0.762512	-25.2	0.847656	-25.2	0.8125	-25.2	1.02655	-25.1	1.10156	-25.2	0.935181	-25.2	0.867188	-25.2	0.863281
-25.1	0.844543	-25.2	0.769531	-25.1	0.847656	-25.1	0.815613	-25.1	1.01251	-25	1.10938	-25.1	0.929688	-25.1	0.871887	-25.1	0.858582
-25	0.836731	-25.1	0.769531	-25	0.847656	-25	0.808594	-25	1.01953	-24.9	1.10156	-25	0.922668	-25	0.882019	-25	0.851563
-24.9	0.833618	-25	0.769531	-24.9	0.852356	-24.9	0.813293	-24.9	1.01953	-24.8	1.10156	-24.9	0.91095	-24.9	0.8797	-24.9	0.846863
-24.8	0.832031	-24.9	0.757019	-24.8	0.862488	-24.8	0.820313	-24.8	1.01953	-24.7	1.10156	-24.8	0.91095	-24.8	0.886719	-24.8	0.839844
-24.7	0.821899	-24.8	0.75	-24.7	0.867188	-24.7	0.820313	-24.7	1.01483	-24.6	1.10626	-24.7	0.91095	-24.7	0.889832	-24.7	0.839844
-24.6	0.8172	-24.7	0.742981	-24.6	0.864075	-24.6	0.820313	-24.6	1.00781	-24.5	1.10468	-24.6	0.907837	-24.6	0.894531	-24.6	0.832825
-24.5	0.8172	-24.6	0.75	-24.5	0.851563	-24.5	0.823425	-24.5	1.00781	-24.4	1.10938	-24.5	0.914856	-24.5	0.899231	-24.5	0.839844
-24.4	0.8172	-24.5	0.75	-24.4	0.851563	-24.4	0.828125	-24.4	1.02423	-24.3	1.10236	-24.4	0.914856	-24.4	0.903137	-24.4	0.839844
-24.3	0.805481	-24.4	0.75	-24.3	0.839844	-24.3	0.828125	-24.3	1.01483	-24.2	1.10938	-24.3	0.917969	-24.3	0.913269	-24.3	0.844543
-24.2	0.805481	-24.3	0.741394	-24.2	0.842957	-24.2	0.832825	-24.2	1.00781	-24.1	1.10468	-24.2	0.915649	-24.2	0.917969	-24.2	0.851563
-24.1	0.805481	-24.2	0.746094	-24.1	0.844543	-24.1	0.839844	-24.1	1.01251	-24	1.10938	-24.1	0.922668	-24.1	0.922668	-24.1	0.84375
-24	0.805481	-24.1	0.742981	-24	0.842957	-24	0.828125	-24	1.01953	-23.9	1.11407	-24	0.922668	-24	0.921082	-24	0.846863
-23.9	0.797668	-24	0.75	-23.9	0.847656	-23.9	0.828125	-23.9	1.01953	-23.8	1.10938	-23.9	0.925781	-23.9	0.930481	-23.9	0.851563
-23.8	0.792969	-23.9	0.75	-23.8	0.847656	-23.8	0.828125	-23.8	1.01953	-23.7	1.11407	-23.8	0.935181	-23.8	0.945313	-23.8	0.836731
-23.7	0.774231	-23.8	0.738281	-23.7	0.835938	-23.7	0.820313	-23.7	1.01953	-23.6	1.11328	-23.7	0.930481	-23.7	0.957031	-23.7	0.835144
-23.6	0.774231	-23.7	0.738281	-23.6	0.835938	-23.6	0.820313	-23.6	1.02264	-23.5	1.11328	-23.6	0.930481	-23.6	0.957031	-23.6	0.836731
-23.5	0.769531	-23.6	0.742981	-23.5	0.828125	-23.5	0.820313	-23.5	1.03906	-23.4	1.11328	-23.5	0.922668	-23.5	0.953918	-23.5	0.832031
-23.4	0.762512	-23.5	0.742188	-23.4	0.828125	-23.4	0.820313	-23.4	1.03906	-23.3	1.12109	-23.4	0.922668	-23.4	0.96405	-23.4	0.832031
-23.3	0.759399	-23.4	0.742188	-23.3	0.828125	-23.3	0.820313	-23.3	1.03906	-23.2	1.12421	-23.3	0.917969	-23.3	0.957031	-23.3	0.832031
-23.2	0.746887	-23.3	0.742188	-23.2	0.828125	-23.2	0.815613	-23.2	1.03906	-23.1	1.11798	-23.2	0.91095	-23.2	0.957031	-23.2	0.820313
-23.1	0.746887	-23.2	0.737488	-23.1	0.816406	-23.1	0.808594	-23.1	1.03906	-23	1.11328	-23.1	0.907837	-23.1	0.957031	-23.1	0.820313
-23	0.730469	-23.1	0.730469	-23	0.808594	-23	0.808594	-23	1.03595	-22.9	1.10858	-23	0.903137	-23	0.957031	-23	0.820313
-22.9	0.72345	-23	0.730469	-22.9	0.808594	-22.9	0.808594	-22.9	1.03436	-22.8	1.10156	-22.9	0.903137	-22.9	0.957031	-22.9	0.8125
-22.8	0.72345	-22.9	0.730469	-22.8	0.808594	-22.8	0.796875	-22.8	1.02423	-22.7	1.10156	-22.8	0.903137	-22.8	0.957031	-22.8	0.8125
-22.7	0.72345	-22.8	0.730469	-22.7	0.808594	-22.7	0.808594	-22.7	1.01953	-22.6	1.08984	-22.7	0.903137	-22.7	0.957031	-22.7	0.8078
-22.6	0.715637	-22.7	0.71875	-22.6	0.808594	-22.6	0.808594	-22.6	1.01953	-22.5	1.08984	-22.6	0.891418	-22.6	0.957031	-22.6	0.800781
-22.5	0.715637	-22.6	0.71875	-22.5	0.808594	-22.5	0.793762	-22.5	1.01953	-22.4	1.08984	-22.5	0.891418	-22.5	0.957031	-22.5	0.800781
-22.4	0.712524	-22.5	0.71875	-22.4	0.808594	-22.4	0.789063	-22.4	1.01953	-22.3	1.08673	-22.4	0.886719	-22.4	0.949219	-22.4	0.793762
-22.3	0.707825	-22.4	0.710938	-22.3	0.808594	-22.3	0.789063	-22.3	1.00781	-22.2	1.09375	-22.3	0.884399	-22.3	0.949219	-22.3	0.800781
-22.2	0.703125	-22.3	0.710938	-22.2	0.793762	-22.2	0.792175	-22.2	1.00781	-22.1	1.09375	-22.2	0.891418	-22.2	0.9375	-22.2	0.788269
-22.1	0.684387	-22.2	0.710938	-22.1	0.789063	-22.1	0.793762	-22.1	1.00781	-22	1.08203	-22.1	0.886719	-22.1	0.9375	-22.1	0.78125
-22	0.684387	-22.1	0.699219	-22	0.789063	-22	0.803894	-22	1.00781	-21.9	1.08203	-22	0.871887	-22	0.925781	-22	0.78125
-21.9	0.684387	-22	0.710938	-21.9	0.789063	-21.9	0.808594	-21.9	1.00781	-21.8	1.08203	-21.9	0.860168	-21.9	0.925781	-21.9	0.78125
-21.8	0.684387	-21.9	0.710938	-21.8	0.789063	-21.8	0.816406	-21.8	1.00781	-21.7	1.08203	-21.8	0.860168	-21.8	0.917969	-21.8	0.78125
-21.7	0.681274	-21.8	0.710938	-21.7	0.784363	-21.7	0.828125	-21.7	1.00781	-21.6	1.08203	-21.7	0.860168	-21.7	0.90625	-21.7	0.78125
-21.6	0.676575	-21.7	0.710938	-21.6	0.769531	-21.6	0.828125	-21.6	0.9953	-21.5	1.07422	-21.6	0.860168	-21.6	0.90625	-21.6	0.78125
-21.5	0.676575	-21.6	0.710938	-21.5	0.769531	-21.5	0.828125	-21.5	0.992981	-21.4	1.07422	-21.5	0.860168	-21.5	0.90625	-21.5	0.769531
-21.4	0.671875	-21.5	0.699219	-21.4	0.757813	-21.4	0.832825	-21.4	0.9953	-21.3	1.06952	-21.4	0.860168	-21.4	0.898438	-21.4	0.769531
-21.3	0.664856	-21.4	0.694519	-21.3	0.757813	-21.3	0.839844	-21.3	0.996094	-21.2	1.0625	-21.3	0.857056	-21.3	0.886719	-21.3	0.769531
-21.2	0.664856	-21.3	0.6875	-21.2	0.746887	-21.2	0.835144	-21.2	0.996094	-21.1	1.0625	-21.2	0.847656	-21.2	0.886719	-21.2	0.769531
-21.1	0.661743	-21.2	0.684387	-21.1	0.730469	-21.1	0.828125	-21.1	0.996094	-21	1.0625	-21.1	0.849243	-21.1	0.886719	-21.1	0.78125
-21	0.657043	-21.1	0.679688	-21	0.725769	-21	0.839844	-21	0.988281	-20.9	1.0625	-21	0.844543	-21	0.886719	-21	0.77655
-20.9	0.657043	-21	0.679688	-20.9	0.71875	-20.9	0.828125	-20.9	0.988281	-20.8	1.0625	-20.9	0.844543	-20.9	0.886719	-20.9	0.769531
-20.8	0.652344	-20.9	0.679688	-20.8	0.707031	-20.8	0.839844	-20.8	0.988281	-20.7	1.0625	-20.8	0.828125	-20.8	0.878906	-20.8	0.769531
-20.7	0.645325	-20.8	0.674988	-20.7	0.707031	-20.7	0.839844	-20.7	0.988281	-20.6	1.04608	-20.7	0.821106	-20.7	0.867188	-20.7	0.766418
-20.6	0.645325	-20.7	0.667969	-20.6	0.694519	-20.6	0.839844	-20.6	0.976563	-20.5	1.03595	-20.6	0.821106	-20.6	0.864075	-20.6	0.761719
-20.5	0.652344	-20.6	0.664856	-20.5	0.6875	-20.5	0.839844	-20.5	0.988281	-20.4	1.01953	-20.5	0.821106	-20.5	0.851563	-20.5	0.75
-20.4	0.645325	-20.5	0.660156	-20.4	0.684387	-20.4	0.839844	-20.4	0.97345	-20.3	1.00702	-20.4	0.809387	-20.4	0.851563	-20.4	0.753113
-20.3	0.645325	-20.4	0.652344	-20.3	0.667969	-20.3	0.836731	-20.3	0.96875	-20.2	1	-20.3	0.809387	-20.3	0.839844	-20.3	0.7547
-20.2	0.642212	-20.3	0.652344	-20.2	0.667969	-20.2	0.832031	-20.2	0.96875	-20.1	0.988281	-20.2	0.801575	-20.2	0.839844	-20.2	0.75
-20.1	0.637512	-20.2	0.660156	-20.1	0.667969	-20.1	0.835144	-20.1	0.956238	-20	0.985168	-20.1	0.801575	-20.1	0.828125	-20.1	0.75
-20	0.637512	-20.1	0.655457	-20	0.660156	-20	0.828125	-20	0.949219	-19.9	0.972656	-20	0.801575	-20	0.823425	-20	0.75
-19.9	0.637512	-20	0.648438	-19.9	0.660156	-19.9	0.839844	-19.9	0.949219	-19.8	0.960938	-19.9	0.801575	-19.9	0.816406	-19.9	0.75
-19.8	0.637512	-19.9	0.648438	-19.8	0.660156	-19.8	0.836731	-19.8	0.949219	-19.7	0.956238	-19.8	0.789856	-19.8	0.808594	-19.8	0.761719
-19.7	0.640625	-19.8	0.648438	-19.7	0.643738	-19.7	0.820313	-19.7	0.949219	-19.6	0.949219	-19.7	0.782043	-19.7	0.808594	-19.7	0.75
-19.6	0.633606	-19.7	0.648438	-19.6	0.633606	-19.6	0.820313	-19.6	0.946106	-19.5	0.946106	-19.6	0.782043	-19.6	0.792175	-19.6	0.75
-19.5	0.630493	-19.6	0.657043	-19.5	0.628906	-19.5	0.820313	-19.5	0.949219	-19.4	0.936707	-19.5	0.782043	-19.5	0.777344	-19.5	0.75
-19.4	0.637512	-19.5	0.652344	-19.4	0.616394	-19.4	0.808594	-19.4	0.944519	-19.3	0.924988	-19.4	0.770325	-19.4	0.777344	-19.4	0.75
-19.3	0.637512	-19.4	0.647644	-19.3	0.609375	-19.3	0.803894	-19.3	0.9375	-19.2	0.914856	-19.3	0.770325	-19.3	0.774231	-19.3	0.753113
-19.2	0.637512	-19.3	0.648438	-19.2	0.606262	-19.2	0.793762	-19.2	0.9375	-19.1	0.897644	-19.2	0.770325	-19.2	0.757813	-19.2	0.7547
-19.1	0.637512	-19.2	0.643738	-19.1	0.596863	-19.1	0.78125	-19.1	0.9375	-19	0.890625	-19.1	0.762512	-19.1	0.757813	-19.1	0.75
-19	0.640625	-19.1	0.636719	-19	0.578125	-19	0.78125	-19	0.929688	-18.9	0.887512	-19	0.762512	-19	0.757813	-19	0.75
-18.9	0.633606	-19	0.633606	-18.9	0.578125	-18.9	0.78125	-18.9	0.924988	-18.8	0.882813	-18.9	0.762512	-18.9	0.757813	-18.9	0.761719
-18.8	0.633606	-18.9	0.628906	-18.8	0.578125	-18.8	0.769531	-18.8	0.90625	-18.7	0.866394	-18.8	0.750793	-18.8	0.753113	-18.8	0.7453
-18.7	0.642212	-18.8	0.635925	-18.7	0.573425	-18.7	0.764832	-18.7	0.90625	-18.6	0.859375	-18.7	0.746094	-18.7	0.738281	-18.7	0.738281
-18.6	0.637512	-18.7	0.625793	-18.6	0.566406	-18.6	0.757813	-18.6	0.895325	-18.5	0.856262	-18.6	0.739075	-18.6	0.738281	-18.6	0.735168
-18.5	0.621094	-18.6	0.624207	-18.5	0.558594	-18.5	0.746887	-18.5	0.890625	-18.4	0.846863	-18.5	0.731262	-18.5	0.726563	-18.5	0.730469
-18.4	0.625793	-18.5	0.617188	-18.4	0.555481	-18.4	0.742188	-18.4	0.890625	-18.3	0.839844	-18.4	0.731262	-18.4	0.726563	-18.4	0.730469
-18.3	0.625793	-18.4	0.625793	-18.3	0.550781	-18.3	0.742188	-18.3	0.874207	-18.2	0.836731	-18.3	0.716431	-18.3	0.72345	-18.3	0.725769
-18.2	0.621094	-18.3	0.621094	-18.2	0.550781	-18.2	0.725769	-18.2	0.864075	-18.1	0.832031	-18.2	0.714844	-18.2	0.710938	-18.2	0.71875
-18.1	0.610962	-18.2	0.624207	-18.1	0.539063	-18.1	0.71875	-18.1	0.859375	-18	0.815613	-18.1	0.707825	-18.1	0.710938	-18.1	0.71875
-18	0.606262	-18.1	0.617188	-18	0.539063	-18	0.71875	-18	0.854675	-17.9	0.808594	-18	0.707825	-18	0.699219	-18	0.71875
-17.9	0.606262	-18	0.614075	-17.9	0.539063	-17.9	0.71875	-17.9	0.835938	-17.8	0.796082	-17.9	0.696899	-17.9	0.699219	-17.9	0.71875
-17.8	0.614075	-17.9	0.616394	-17.8	0.534363	-17.8	0.71875	-17.8	0.825012	-17.7	0.789063	-17.8	0.6922	-17.8	0.694519	-17.8	0.71875
-17.7	0.609375	-17.8	0.609375	-17.7	0.524231	-17.7	0.710938	-17.7	0.808594	-17.6	0.793762	-17.7	0.6922	-17.7	0.6875	-17.7	0.71875
-17.6	0.602356	-17.7	0.604675	-17.6	0.507813	-17.6	0.707825	-17.6	0.796082	-17.5	0.796082	-17.6	0.6922	-17.6	0.6875	-17.6	0.71875
-17.5	0.599243	-17.6	0.606262	-17.5	0.507813	-17.5	0.703125	-17.5	0.789063	-17.4	0.782043	-17.5	0.680481	-17.5	0.675781	-17.5	0.715637
-17.4	0.606262	-17.5	0.601563	-17.4	0.507813	-17.4	0.710938	-17.4	0.784363	-17.3	0.796082	-17.4	0.672668	-17.4	0.675781	-17.4	0.710938
-17.3	0.606262	-17.4	0.604675	-17.3	0.507813	-17.3	0.703125	-17.3	0.765625	-17.2	0.777344	-17.3	0.672668	-17.3	0.675781	-17.3	0.706238
-17.2	0.606262	-17.3	0.594543	-17.2	0.519531	-17.2	0.703125	-17.2	0.762512	-17.1	0.777344	-17.2	0.672668	-17.2	0.667969	-17.2	0.710938
-17.1	0.601563	-17.2	0.601563	-17.1	0.514832	-17.1	0.686707	-17.1	0.75	-17	0.769531	-17.1	0.66095	-17.1	0.667969	-17.1	0.707825
-17	0.594543	-17.1	0.601563	-17	0.507813	-17	0.679688	-17	0.75	-16.9	0.769531	-17	0.66095	-17	0.667969	-17	0.703125
-16.9	0.591431	-17	0.604675	-16.9	0.507813	-16.9	0.679688	-16.9	0.733582	-16.8	0.766418	-16.9	0.664063	-16.9	0.667969	-16.9	0.703125
-16.8	0.582031	-16.9	0.606262	-16.8	0.496094	-16.8	0.679688	-16.8	0.726563	-16.7	0.761719	-16.8	0.66095	-16.8	0.667969	-16.8	0.686707
-16.7	0.575012	-16.8	0.601563	-16.7	0.492981	-16.7	0.679688	-16.7	0.715637	-16.6	0.75	-16.7	0.657837	-16.7	0.65625	-16.7	0.674988
-16.6	0.575012	-16.7	0.604675	-16.6	0.5	-16.6	0.674988	-16.6	0.710938	-16.5	0.742188	-16.6	0.653137	-16.6	0.667969	-16.6	0.679688
-16.5	0.575012	-16.6	0.606262	-16.5	0.4953	-16.5	0.672668	-16.5	0.710938	-16.4	0.7453	-16.5	0.653137	-16.5	0.667969	-16.5	0.667969
-16.4	0.571899	-16.5	0.601563	-16.4	0.481262	-16.4	0.674988	-16.4	0.694519	-16.3	0.738281	-16.4	0.641418	-16.4	0.653137	-16.4	0.664856
-16.3	0.578918	-16.4	0.596863	-16.3	0.4953	-16.3	0.667969	-16.3	0.6875	-16.2	0.738281	-16.3	0.641418	-16.3	0.648438	-16.3	0.671875
-16.2	0.574219	-16.3	0.601563	-16.2	0.488281	-16.2	0.667969	-16.2	0.6875	-16.1	0.730469	-16.2	0.641418	-16.2	0.648438	-16.2	0.671875
-16.1	0.5672	-16.2	0.601563	-16.1	0.47345	-16.1	0.667969	-16.1	0.6875	-16	0.730469	-16.1	0.633606	-16.1	0.648438	-16.1	0.667175
-16	0.575012	-16.1	0.601563	-16	0.46405	-16	0.664856	-16	0.675781	-15.9	0.730469	-16	0.628906	-16	0.648438	-16	0.660156
-15.9	0.570313	-16	0.604675	-15.9	0.457031	-15.9	0.660156	-15.9	0.675781	-15.8	0.730469	-15.9	0.610168	-15.9	0.648438	-15.9	0.657043
-15.8	0.563293	-15.9	0.594543	-15.8	0.457031	-15.8	0.655457	-15.8	0.675781	-15.7	0.715637	-15.8	0.610168	-15.8	0.648438	-15.8	0.647644
-15.7	0.560181	-15.8	0.601563	-15.7	0.46875	-15.7	0.648438	-15.7	0.664856	-15.6	0.710938	-15.7	0.607056	-15.7	0.643738	-15.7	0.640625
-15.6	0.555481	-15.7	0.596863	-15.6	0.46875	-15.6	0.645325	-15.6	0.660156	-15.5	0.710938	-15.6	0.590637	-15.6	0.628906	-15.6	0.637512
-15.5	0.555481	-15.6	0.589844	-15.5	0.46405	-15.5	0.640625	-15.5	0.660156	-15.4	0.706238	-15.5	0.590637	-15.5	0.628906	-15.5	0.632813
-15.4	0.555481	-15.5	0.594543	-15.4	0.457031	-15.4	0.635925	-15.4	0.660156	-15.3	0.699219	-15.4	0.582825	-15.4	0.633606	-15.4	0.632813
-15.3	0.550781	-15.4	0.596863	-15.3	0.457031	-15.3	0.628906	-15.3	0.660156	-15.2	0.699219	-15.3	0.582825	-15.3	0.635925	-15.3	0.628113
-15.2	0.543762	-15.3	0.592957	-15.2	0.457031	-15.2	0.628906	-15.2	0.643738	-15.1	0.710938	-15.2	0.578125	-15.2	0.628906	-15.2	0.621094
-15.1	0.555481	-15.2	0.597656	-15.1	0.453918	-15.1	0.628906	-15.1	0.653137	-15	0.710938	-15.1	0.571106	-15.1	0.628906	-15.1	0.616394
-15	0.552368	-15.1	0.594543	-15	0.460938	-15	0.625793	-15	0.643738	-14.9	0.710938	-15	0.571106	-15	0.617188	-15	0.606262
-14.9	0.555481	-15	0.601563	-14.9	0.460938	-14.9	0.621094	-14.9	0.636719	-14.8	0.71875	-14.9	0.571106	-14.9	0.612488	-14.9	0.601563
-14.8	0.555481	-14.9	0.601563	-14.8	0.46875	-14.8	0.616394	-14.8	0.636719	-14.7	0.710938	-14.8	0.571106	-14.8	0.605469	-14.8	0.601563
-14.7	0.550781	-14.8	0.589844	-14.7	0.46875	-14.7	0.609375	-14.7	0.636719	-14.6	0.710938	-14.7	0.571106	-14.7	0.605469	-14.7	0.596863
-14.6	0.555481	-14.7	0.596863	-14.6	0.46875	-14.6	0.604675	-14.6	0.648438	-14.5	0.715637	-14.6	0.571106	-14.6	0.605469	-14.6	0.586731
-14.5	0.555481	-14.6	0.594543	-14.5	0.46875	-14.5	0.597656	-14.5	0.648438	-14.4	0.710938	-14.5	0.567993	-14.5	0.617188	-14.5	0.582031
-14.4	0.547668	-14.5	0.589844	-14.4	0.46875	-14.4	0.594543	-14.4	0.648438	-14.3	0.706238	-14.4	0.563293	-14.4	0.605469	-14.4	0.589844
-14.3	0.53595	-14.4	0.596863	-14.3	0.46405	-14.3	0.589844	-14.3	0.636719	-14.2	0.699219	-14.3	0.558594	-14.3	0.605469	-14.3	0.589844
-14.2	0.532837	-14.3	0.589844	-14.2	0.457031	-14.2	0.585144	-14.2	0.633606	-14.1	0.699219	-14.2	0.551575	-14.2	0.617188	-14.2	0.577332
-14.1	0.528137	-14.2	0.589844	-14.1	0.46875	-14.1	0.582825	-14.1	0.632019	-14	0.699219	-14.1	0.548462	-14.1	0.617188	-14.1	0.570313
-14	0.523438	-14.1	0.582031	-14	0.46875	-14	0.585144	-14	0.636719	-13.9	0.699219	-14	0.532043	-14	0.614075	-14	0.5672
-13.9	0.511719	-14	0.573425	-13.9	0.465637	-13.9	0.586731	-13.9	0.625793	-13.8	0.699219	-13.9	0.527344	-13.9	0.609375	-13.9	0.5578
-13.8	0.501587	-13.9	0.575012	-13.8	0.460938	-13.8	0.589844	-13.8	0.621094	-13.7	0.691406	-13.8	0.520325	-13.8	0.609375	-13.8	0.550781
-13.7	0.496887	-13.8	0.565613	-13.7	0.460938	-13.7	0.585144	-13.7	0.604675	-13.6	0.699219	-13.7	0.515625	-13.7	0.609375	-13.7	0.550781
-13.6	0.5047	-13.7	0.563293	-13.6	0.460938	-13.6	0.586731	-13.6	0.597656	-13.5	0.699219	-13.6	0.508606	-13.6	0.604675	-13.6	0.547668
-13.5	0.5	-13.6	0.558594	-13.5	0.46875	-13.5	0.565613	-13.5	0.597656	-13.4	0.688293	-13.5	0.508606	-13.5	0.602356	-13.5	0.542969
-13.4	0.489868	-13.5	0.565613	-13.4	0.46405	-13.4	0.5672	-13.4	0.589844	-13.3	0.683594	-13.4	0.508606	-13.4	0.604675	-13.4	0.538269
-13.3	0.485168	-13.4	0.555481	-13.3	0.457031	-13.3	0.5578	-13.3	0.589844	-13.2	0.678894	-13.3	0.505493	-13.3	0.597656	-13.3	0.52655
-13.2	0.480469	-13.3	0.546082	-13.2	0.457031	-13.2	0.546082	-13.2	0.578125	-13.1	0.671875	-13.2	0.500793	-13.2	0.597656	-13.2	0.519531
-13.1	0.470337	-13.2	0.550781	-13.1	0.457031	-13.1	0.53595	-13.1	0.578125	-13	0.671875	-13.1	0.512512	-13.1	0.594543	-13.1	0.516418
-13	0.460938	-13.1	0.53595	-13	0.457031	-13	0.534363	-13	0.578125	-12.9	0.671875	-13	0.512512	-13	0.589844	-13	0.511719
-12.9	0.460938	-13	0.538269	-12.9	0.457031	-12.9	0.524231	-12.9	0.573425	-12.8	0.671875	-12.9	0.512512	-12.9	0.589844	-12.9	0.511719
-12.8	0.450806	-12.9	0.53125	-12.8	0.453918	-12.8	0.519531	-12.8	0.563293	-12.7	0.667175	-12.8	0.500793	-12.8	0.589844	-12.8	0.507019
-12.7	0.446106	-12.8	0.534363	-12.7	0.460938	-12.7	0.52655	-12.7	0.558594	-12.6	0.648438	-12.7	0.507813	-12.7	0.589844	-12.7	0.5
-12.6	0.453125	-12.7	0.524231	-12.6	0.456238	-12.6	0.519531	-12.6	0.558594	-12.5	0.657043	-12.6	0.489075	-12.6	0.589844	-12.6	0.496887
-12.5	0.450806	-12.6	0.519531	-12.5	0.449219	-12.5	0.511719	-12.5	0.558594	-12.4	0.652344	-12.5	0.497681	-12.5	0.585144	-12.5	0.492188
-12.4	0.446106	-12.5	0.514832	-12.4	0.446106	-12.4	0.496887	-12.4	0.570313	-12.3	0.647644	-12.4	0.481262	-12.4	0.582825	-12.4	0.487488
-12.3	0.446106	-12.4	0.516418	-12.3	0.444519	-12.3	0.487488	-12.3	0.565613	-12.2	0.640625	-12.3	0.488281	-12.3	0.592957	-12.3	0.488281
-12.2	0.453125	-12.3	0.511719	-12.2	0.4375	-12.2	0.488281	-12.2	0.563293	-12.1	0.645325	-12.2	0.478149	-12.2	0.585938	-12.2	0.488281
-12.1	0.431274	-12.2	0.503906	-12.1	0.4328	-12.1	0.4953	-12.1	0.558594	-12	0.632813	-12.1	0.46875	-12.1	0.585938	-12.1	0.488281
-12	0.421875	-12.1	0.4953	-12	0.4375	-12	0.485168	-12	0.553894	-11.9	0.635925	-12	0.461731	-12	0.585938	-12	0.480469
-11.9	0.426575	-12	0.483582	-11.9	0.434387	-11.9	0.480469	-11.9	0.546875	-11.8	0.625793	-11.9	0.458618	-11.9	0.582825	-11.9	0.46875
-11.8	0.423462	-11.9	0.47345	-11.8	0.429688	-11.8	0.475769	-11.8	0.546875	-11.7	0.621094	-11.8	0.453918	-11.8	0.573425	-11.8	0.46875
-11.7	0.426575	-11.8	0.46875	-11.7	0.421875	-11.7	0.46875	-11.7	0.546875	-11.6	0.608582	-11.7	0.457031	-11.7	0.566406	-11.7	0.465637
-11.6	0.421875	-11.7	0.46405	-11.6	0.410156	-11.6	0.480469	-11.6	0.555481	-11.5	0.609375	-11.6	0.445313	-11.6	0.566406	-11.6	0.46405
-11.5	0.426575	-11.6	0.457031	-11.5	0.413269	-11.5	0.477356	-11.5	0.553894	-11.4	0.604675	-11.5	0.435181	-11.5	0.563293	-11.5	0.465637
-11.4	0.426575	-11.5	0.465637	-11.4	0.403137	-11.4	0.480469	-11.4	0.555481	-11.3	0.594543	-11.4	0.4422	-11.4	0.558594	-11.4	0.46405
-11.3	0.434387	-11.4	0.460938	-11.3	0.393738	-11.3	0.475769	-11.3	0.550781	-11.2	0.589844	-11.3	0.434387	-11.3	0.553894	-11.3	0.46875
-11.2	0.434387	-11.3	0.456238	-11.2	0.382019	-11.2	0.46875	-11.2	0.539063	-11.1	0.589844	-11.2	0.422668	-11.2	0.546875	-11.2	0.46875
-11.1	0.426575	-11.2	0.449219	-11.1	0.371887	-11.1	0.46875	-11.1	0.534363	-11	0.589844	-11.1	0.434387	-11.1	0.542175	-11.1	0.46875
-11	0.421875	-11.1	0.449219	-11	0.367188	-11	0.465637	-11	0.527344	-10.9	0.585144	-11	0.434387	-11	0.532043	-11	0.477356
-10.9	0.414856	-11	0.449219	-10.9	0.378906	-10.9	0.472656	-10.9	0.527344	-10.8	0.578125	-10.9	0.429688	-10.9	0.539063	-10.9	0.472656
-10.8	0.411743	-10.9	0.449219	-10.8	0.374207	-10.8	0.472656	-10.8	0.519531	-10.7	0.570313	-10.8	0.422668	-10.8	0.539063	-10.8	0.472656
-10.7	0.407043	-10.8	0.453918	-10.7	0.364075	-10.7	0.472656	-10.7	0.524231	-10.6	0.5672	-10.7	0.419556	-10.7	0.534363	-10.7	0.472656
-10.6	0.407043	-10.7	0.449219	-10.6	0.359375	-10.6	0.472656	-10.6	0.519531	-10.5	0.5625	-10.6	0.414856	-10.6	0.524231	-10.6	0.472656
-10.5	0.402344	-10.6	0.444519	-10.5	0.366394	-10.5	0.480469	-10.5	0.52655	-10.4	0.5625	-10.5	0.417969	-10.5	0.519531	-10.5	0.467957
-10.4	0.400024	-10.5	0.4375	-10.4	0.356262	-10.4	0.475769	-10.4	0.514832	-10.3	0.5625	-10.4	0.41095	-10.4	0.519531	-10.4	0.46875
-10.3	0.395325	-10.4	0.4375	-10.3	0.346863	-10.3	0.46875	-10.3	0.512512	-10.2	0.5578	-10.3	0.422668	-10.3	0.519531	-10.3	0.46875
-10.2	0.390625	-10.3	0.4375	-10.2	0.339844	-10.2	0.472656	-10.2	0.519531	-10.1	0.550781	-10.2	0.417969	-10.2	0.527344	-10.2	0.46875
-10.1	0.375793	-10.2	0.449219	-10.1	0.344543	-10.1	0.460938	-10.1	0.514832	-10	0.550781	-10.1	0.41095	-10.1	0.522644	-10.1	0.480469
-10	0.372681	-10.1	0.449219	-10	0.335144	-10	0.46405	-10	0.5047	-9.9	0.53595	-10	0.418762	-10	0.515625	-10	0.475769
-9.9	0.371094	-10	0.446106	-9.9	0.328125	-9.9	0.449219	-9.9	0.5	-9.8	0.53125	-9.9	0.415649	-9.9	0.512512	-9.9	0.46875
-9.8	0.353149	-9.9	0.444519	-9.8	0.323425	-9.8	0.457031	-9.8	0.4953	-9.7	0.518738	-9.8	0.41095	-9.8	0.503113	-9.8	0.465637
-9.7	0.351563	-9.8	0.446106	-9.7	0.313293	-9.7	0.457031	-9.7	0.492981	-9.6	0.496887	-9.7	0.41095	-9.7	0.496094	-9.7	0.472656
-9.6	0.344543	-9.7	0.436707	-9.6	0.320313	-9.6	0.465637	-9.6	0.483582	-9.5	0.487488	-9.6	0.422668	-9.6	0.492981	-9.6	0.472656
-9.5	0.332031	-9.6	0.429688	-9.5	0.320313	-9.5	0.460938	-9.5	0.476563	-9.4	0.480469	-9.5	0.417969	-9.5	0.483582	-9.5	0.467957
-9.4	0.321899	-9.5	0.421875	-9.4	0.315613	-9.4	0.460938	-9.4	0.471863	-9.3	0.475769	-9.4	0.407837	-9.4	0.476563	-9.4	0.460938
-9.3	0.3172	-9.4	0.410156	-9.3	0.308594	-9.3	0.460938	-9.3	0.47345	-9.2	0.453918	-9.3	0.403137	-9.3	0.483582	-9.3	0.460938
-9.2	0.300781	-9.3	0.410156	-9.2	0.308594	-9.2	0.460938	-9.2	0.46405	-9.1	0.441406	-9.2	0.398438	-9.2	0.47345	-9.2	0.457825
-9.1	0.290649	-9.2	0.410156	-9.1	0.305481	-9.1	0.467957	-9.1	0.465637	-9	0.441406	-9.1	0.391418	-9.1	0.480469	-9.1	0.453125
-9	0.28125	-9.1	0.410156	-9	0.296082	-9	0.460938	-9	0.456238	-8.9	0.424988	-9	0.388306	-9	0.475769	-9	0.453125
-8.9	0.282837	-9	0.405457	-8.9	0.289063	-8.9	0.457825	-8.9	0.457031	-8.8	0.410156	-8.9	0.378906	-8.9	0.47345	-8.9	0.453125
-8.8	0.273438	-8.9	0.395325	-8.8	0.289063	-8.8	0.436707	-8.8	0.449219	-8.7	0.398438	-8.8	0.3797	-8.8	0.46875	-8.8	0.448425
-8.7	0.266418	-8.8	0.390625	-8.7	0.289063	-8.7	0.426575	-8.7	0.446106	-8.6	0.395325	-8.7	0.3797	-8.7	0.46405	-8.7	0.441406
-8.6	0.266418	-8.7	0.385925	-8.6	0.28595	-8.6	0.421875	-8.6	0.444519	-8.5	0.382813	-8.6	0.3797	-8.6	0.453918	-8.6	0.441406
-8.5	0.261719	-8.6	0.375793	-8.5	0.27655	-8.5	0.417175	-8.5	0.4375	-8.4	0.366394	-8.5	0.383606	-8.5	0.444519	-8.5	0.438293
-8.4	0.2547	-8.5	0.366394	-8.4	0.274231	-8.4	0.410156	-8.4	0.429688	-8.3	0.356262	-8.4	0.371887	-8.4	0.4375	-8.4	0.433594
-8.3	0.251587	-8.4	0.356262	-8.3	0.257019	-8.3	0.405457	-8.3	0.429688	-8.2	0.346863	-8.3	0.367188	-8.3	0.4328	-8.3	0.428894
-8.2	0.246887	-8.3	0.346863	-8.2	0.25	-8.2	0.395325	-8.2	0.429688	-8.1	0.332031	-8.2	0.357056	-8.2	0.422668	-8.2	0.429688
-8.1	0.242188	-8.2	0.335144	-8.1	0.2453	-8.1	0.385925	-8.1	0.424988	-8	0.332031	-8.1	0.352356	-8.1	0.413269	-8.1	0.429688
-8	0.232056	-8.1	0.328125	-8	0.235168	-8	0.375793	-8	0.417969	-7.9	0.3172	-8	0.335938	-8	0.403137	-8	0.424988
-7.9	0.235168	-8	0.325012	-7.9	0.230469	-7.9	0.366394	-7.9	0.414856	-7.8	0.3078	-7.9	0.325806	-7.9	0.393738	-7.9	0.417969
-7.8	0.235168	-7.9	0.320313	-7.8	0.230469	-7.8	0.339844	-7.8	0.413269	-7.7	0.284363	-7.8	0.328125	-7.8	0.398438	-7.8	0.414856
-7.7	0.230469	-7.8	0.315613	-7.7	0.225769	-7.7	0.339844	-7.7	0.403137	-7.6	0.274231	-7.7	0.321106	-7.7	0.395325	-7.7	0.421875
-7.6	0.22345	-7.7	0.308594	-7.6	0.215637	-7.6	0.332031	-7.6	0.393738	-7.5	0.261719	-7.6	0.317993	-7.6	0.385925	-7.6	0.421875
-7.5	0.220337	-7.6	0.305481	-7.5	0.210938	-7.5	0.303894	-7.5	0.375793	-7.4	0.257019	-7.5	0.320313	-7.5	0.383606	-7.5	0.421875
-7.4	0.215637	-7.5	0.300781	-7.4	0.210938	-7.4	0.293762	-7.4	0.366394	-7.3	0.235168	-7.4	0.308594	-7.4	0.374207	-7.4	0.421875
-7.3	0.203125	-7.4	0.300781	-7.3	0.206238	-7.3	0.273438	-7.3	0.359375	-7.2	0.230469	-7.3	0.298462	-7.3	0.362488	-7.3	0.424988
-7.2	0.192993	-7.3	0.296082	-7.2	0.203918	-7.2	0.264832	-7.2	0.354675	-7.1	0.210938	-7.2	0.301575	-7.2	0.352356	-7.2	0.417969
-7.1	0.183594	-7.2	0.300781	-7.1	0.206238	-7.1	0.25	-7.1	0.347656	-7	0.203125	-7.1	0.296875	-7.1	0.347656	-7.1	0.414856
-7	0.171875	-7.1	0.297668	-7	0.207031	-7	0.246887	-7	0.332825	-6.9	0.186707	-7	0.298462	-7	0.351563	-7	0.410156
-6.9	0.161743	-7	0.296082	-6.9	0.207031	-6.9	0.237488	-6.9	0.320313	-6.8	0.179688	-6.9	0.301575	-6.9	0.339844	-6.9	0.410156
-6.8	0.149231	-6.9	0.27655	-6.8	0.207031	-6.8	0.225769	-6.8	0.315613	-6.7	0.167969	-6.8	0.301575	-6.8	0.335144	-6.8	0.410156
-6.7	0.132813	-6.8	0.277344	-6.7	0.207031	-6.7	0.215637	-6.7	0.300781	-6.6	0.160156	-6.7	0.301575	-6.7	0.325012	-6.7	0.397644
-6.6	0.125793	-6.7	0.274231	-6.6	0.207031	-6.6	0.194519	-6.6	0.289063	-6.5	0.145325	-6.6	0.296875	-6.6	0.315613	-6.6	0.390625
-6.5	0.122681	-6.6	0.261719	-6.5	0.207031	-6.5	0.184387	-6.5	0.284363	-6.4	0.135925	-6.5	0.293762	-6.5	0.300781	-6.5	0.387512
-6.4	0.113281	-6.5	0.2453	-6.4	0.199219	-6.4	0.174988	-6.4	0.274231	-6.3	0.121094	-6.4	0.277344	-6.4	0.296875	-6.4	0.366394
-6.3	0.103149	-6.4	0.235168	-6.3	0.196106	-6.3	0.157043	-6.3	0.257813	-6.2	0.109375	-6.3	0.267212	-6.3	0.303894	-6.3	0.356262
-6.2	0.09375	-6.3	0.225769	-6.2	0.191406	-6.2	0.140625	-6.2	0.253113	-6.1	0.104675	-6.2	0.265625	-6.2	0.293762	-6.2	0.346863
-6.1	0.086731	-6.2	0.215637	-6.1	0.194519	-6.1	0.135925	-6.1	0.257813	-6	0.086731	-6.1	0.255493	-6.1	0.289063	-6.1	0.335144
-6	0.086731	-6.1	0.206238	-6	0.179688	-6	0.128906	-6	0.2547	-5.9	0.0703125	-6	0.257813	-6	0.284363	-6	0.325012
-5.9	0.086731	-6	0.199219	-5.9	0.179688	-5.9	0.125793	-5.9	0.233582	-5.8	0.0656128	-5.9	0.250793	-5.9	0.274231	-5.9	0.315613
-5.8	0.0820313	-5.9	0.206238	-5.8	0.174988	-5.8	0.108582	-5.8	0.226563	-5.7	0.0507813	-5.8	0.231262	-5.8	0.264832	-5.8	0.3172
-5.7	0.0718994	-5.8	0.196106	-5.7	0.167969	-5.7	0.101563	-5.7	0.226563	-5.6	0.0359497	-5.7	0.231262	-5.7	0.242981	-5.7	0.300781
-5.6	0.0671997	-5.7	0.191406	-5.6	0.167969	-5.6	0.0968628	-5.6	0.215637	-5.5	0.03125	-5.6	0.22345	-5.6	0.233582	-5.6	0.296082
-5.5	0.0703125	-5.6	0.167175	-5.5	0.164856	-5.5	0.0898438	-5.5	0.199219	-5.4	0.00701904	-5.5	0.200012	-5.5	0.233582	-5.5	0.28595
-5.4	0.0632935	-5.5	0.157043	-5.4	0.160156	-5.4	0.0898438	-5.4	0.186707	-5.3	0.00469971	-5.4	0.1922	-5.4	0.22345	-5.4	0.28125
-5.3	0.0601807	-5.4	0.152344	-5.3	0.160156	-5.3	0.086731	-5.3	0.164856	-5.2	0	-5.3	0.1875	-5.3	0.21405	-5.3	0.273438
-5.2	0.055481	-5.3	0.147644	-5.2	0.152344	-5.2	0.0703125	-5.2	0.160156	-5.1	0	-5.2	0.177368	-5.2	0.1922	-5.2	0.268738
-5.1	0.0507813	-5.2	0.148438	-5.1	0.128906	-5.1	0.0703125	-5.1	0.155457	-5	-0.0078125	-5.1	0.167969	-5.1	0.1875	-5.1	0.261719
-5	0.0437622	-5.1	0.148438	-5	0.128906	-5	0.0703125	-5	0.148438	-4.9	-0.0195313	-5	0.157837	-5	0.1828	-5	0.258606
-4.9	0.055481	-5	0.145325	-4.9	0.124207	-4.9	0.0703125	-4.9	0.136719	-4.8	-0.0164185	-4.9	0.148438	-4.9	0.175781	-4.9	0.237488
-4.8	0.0523682	-4.9	0.140625	-4.8	0.109375	-4.8	0.0703125	-4.8	0.136719	-4.7	-0.0148315	-4.8	0.146118	-4.8	0.175781	-4.8	0.230469
-4.7	0.0476685	-4.8	0.140625	-4.7	0.106262	-4.7	0.0703125	-4.7	0.124207	-4.6	-0.0078125	-4.7	0.153137	-4.7	0.164856	-4.7	0.230469
-4.6	0.0429688	-4.7	0.140625	-4.6	0.0968628	-4.6	0.0703125	-4.6	0.117188	-4.5	-0.0078125	-4.6	0.153137	-4.6	0.155457	-4.6	0.21875
-4.5	0.0359497	-4.6	0.135925	-4.5	0.0898438	-4.5	0.0656128	-4.5	0.105469	-4.4	-0.00469971	-4.5	0.148438	-4.5	0.148438	-4.5	0.21875
-4.4	0.0359497	-4.5	0.128906	-4.4	0.078125	-4.4	0.0585938	-4.4	0.102356	-4.3	-0.0117188	-4.4	0.1297	-4.4	0.145325	-4.4	0.206238
-4.3	0.0359497	-4.4	0.128906	-4.3	0.078125	-4.3	0.055481	-4.3	0.0898438	-4.2	-0.0117188	-4.3	0.1297	-4.3	0.135925	-4.3	0.207031
-4.2	0.0359497	-4.3	0.124207	-4.2	0.078125	-4.2	0.0507813	-4.2	0.0898438	-4.1	-0.0117188	-4.2	0.1297	-4.2	0.117188	-4.2	0.196106
-4.1	0.0359497	-4.2	0.117188	-4.1	0.078125	-4.1	0.0507813	-4.1	0.0898438	-4	-0.00701904	-4.1	0.1297	-4.1	0.117188	-4.1	0.191406
-4	0.0359497	-4.1	0.128906	-4	0.0750122	-4	0.0625	-4	0.078125	-3.9	-0.0078125	-4	0.1297	-4	0.109375	-4	0.191406
-3.9	0.0390625	-4	0.125793	-3.9	0.0585938	-3.9	0.0578003	-3.9	0.0734253	-3.8	-0.0078125	-3.9	0.1297	-3.9	0.0976563	-3.9	0.186707
-3.8	0.0320435	-3.9	0.121094	-3.8	0.053894	-3.8	0.0390625	-3.8	0.0585938	-3.7	-0.0195313	-3.8	0.141418	-3.8	0.0976563	-3.8	0.167969
-3.7	0.0289307	-3.8	0.124207	-3.7	0.046875	-3.7	0.0390625	-3.7	0.0585938	-3.6	-0.0195313	-3.7	0.1297	-3.7	0.085144	-3.7	0.164856
-3.6	0.0359497	-3.7	0.117188	-3.6	0.0390625	-3.6	0.0507813	-3.6	0.0437622	-3.5	-0.0148315	-3.6	0.1297	-3.6	0.078125	-3.6	0.152344
-3.5	0.0359497	-3.6	0.128906	-3.5	0.0343628	-3.5	0.0507813	-3.5	0.0390625	-3.4	-0.0078125	-3.5	0.1297	-3.5	0.078125	-3.5	0.152344
-3.4	0.03125	-3.5	0.125793	-3.4	0.0273438	-3.4	0.0507813	-3.4	0.0390625	-3.3	-0.0078125	-3.4	0.1297	-3.4	0.0750122	-3.4	0.152344
-3.3	0.024231	-3.4	0.121094	-3.3	0.024231	-3.3	0.0507813	-3.3	0.0390625	-3.2	-0.0195313	-3.3	0.1297	-3.3	0.0703125	-3.3	0.147644
-3.2	0.0359497	-3.3	0.121094	-3.2	0.0195313	-3.2	0.0390625	-3.2	0.0390625	-3.1	-0.0164185	-3.2	0.118774	-3.2	0.0703125	-3.2	0.128906
-3.1	0.0359497	-3.2	0.116394	-3.1	0.0195313	-3.1	0.0390625	-3.1	0.0390625	-3	-0.0195313	-3.1	0.121887	-3.1	0.078125	-3.1	0.128906
-3	0.0406494	-3.1	0.117188	-3	0.0273438	-3	0.0390625	-3	0.03125	-2.9	-0.0195313	-3	0.114075	-3	0.078125	-3	0.121094
-2.9	0.0281372	-3	0.117188	-2.9	0.0273438	-2.9	0.0437622	-2.9	0.03125	-2.8	-0.0148315	-2.9	0.114075	-2.9	0.078125	-2.9	0.121094
-2.8	0.0281372	-2.9	0.114075	-2.8	0.0273438	-2.8	0.0390625	-2.8	0.0195313	-2.7	-0.0195313	-2.8	0.102356	-2.8	0.078125	-2.8	0.106262
-2.7	0.0359497	-2.8	0.109375	-2.7	0.0148315	-2.7	0.0507813	-2.7	0.0148315	-2.6	-0.0195313	-2.7	0.0976563	-2.7	0.0656128	-2.7	0.101563
-2.6	0.03125	-2.7	0.121094	-2.6	0.015625	-2.6	0.0390625	-2.6	0.0078125	-2.5	-0.024231	-2.6	0.0906372	-2.6	0.0585938	-2.6	0.101563
-2.5	0.024231	-2.6	0.109375	-2.5	0.0078125	-2.5	0.0507813	-2.5	0.0078125	-2.4	-0.00701904	-2.5	0.0906372	-2.5	0.0585938	-2.5	0.101563
-2.4	0.024231	-2.5	0.104675	-2.4	0.0125122	-2.4	0.0460815	-2.4	0.0125122	-2.3	0	-2.4	0.0828247	-2.4	0.0585938	-2.4	0.0890503
-2.3	0.024231	-2.4	0.0898438	-2.3	0.0109253	-2.3	0.0390625	-2.3	0.0078125	-2.2	0.00311279	-2.3	0.0828247	-2.3	0.0585938	-2.3	0.0820313
-2.2	0.0211182	-2.3	0.0976563	-2.2	0.015625	-2.2	0.0390625	-2.2	0.0078125	-2.1	0.00469971	-2.2	0.071106	-2.2	0.055481	-2.2	0.0703125
-2.1	0.0117188	-2.2	0.0929565	-2.1	0.024231	-2.1	0.0390625	-2.1	0.0078125	-2	0.0117188	-2.1	0.071106	-2.1	0.0507813	-2.1	0.0656128
-2	0.00469971	-2.1	0.0976563	-2	0.022644	-2	0.0390625	-2	0.0078125	-1.9	0	-2	0.071106	-2	0.0507813	-2	0.046875
-1.9	0.00469971	-2	0.0859375	-1.9	0.024231	-1.9	0.024231	-1.9	0.0109253	-1.8	0	-1.9	0.071106	-1.9	0.0507813	-1.9	0.0585938
-1.8	0.00469971	-1.9	0.0828247	-1.8	0.0195313	-1.8	0.0148315	-1.8	0.015625	-1.7	0	-1.8	0.0585938	-1.8	0.0390625	-1.8	0.0390625
-1.7	0.00469971	-1.8	0.078125	-1.7	0.0195313	-1.7	0.0078125	-1.7	0.015625	-1.6	0.00469971	-1.7	0.0515747	-1.7	0.0390625	-1.7	0.0390625
-1.6	0.00158691	-1.7	0.078125	-1.6	0.0195313	-1.6	0	-1.6	0.015625	-1.5	0.0148315	-1.6	0.0445557	-1.6	0.0390625	-1.6	0.0359497
-1.5	-0.00311279	-1.6	0.0734253	-1.5	0.0148315	-1.5	0	-1.5	0.015625	-1.4	0.0164185	-1.5	0.039856	-1.5	0.0390625	-1.5	0.03125
-1.4	-0.00311279	-1.5	0.0585938	-1.4	0.0125122	-1.4	0	-1.4	0.0078125	-1.3	0.00390625	-1.4	0.039856	-1.4	0.0273438	-1.4	0.0195313
-1.3	-0.0078125	-1.4	0.0585938	-1.3	0.0195313	-1.3	0	-1.3	0.00469971	-1.2	0.00390625	-1.3	0.0320435	-1.3	0.0273438	-1.3	0.0195313
-1.2	-0.00311279	-1.3	0.055481	-1.2	0.0195313	-1.2	0	-1.2	0.00311279	-1.1	0.00390625	-1.2	0.0203247	-1.2	0.0195313	-1.2	0.0195313
-1.1	-0.00311279	-1.2	0.0507813	-1.1	0.0195313	-1.1	-0.00311279	-1.1	0.00469971	-1	0.00701904	-1.1	0.0203247	-1.1	0.0195313	-1.1	0.0117188
-1	-2.27374E-13	-1.1	0.0460815	-1	0.0148315	-1	-0.00469971	-1	0.0109253	-0.899998	0.0117188	-1	0.0125122	-1	0.0078125	-1	0.0117188
-0.900002	-0.00701904	-1	0.0390625	-0.900002	0.0078125	-0.900002	-0.00311279	-0.900002	0.0078125	-0.799999	0.0117188	-0.900002	0.0125122	-0.900002	0.0195313	-0.900002	0.0117188
-0.799999	-0.0148315	-0.899998	0.0390625	-0.799999	0.0078125	-0.799999	-0.00469971	-0.799999	0.015625	-0.699997	0.0117188	-0.799999	0.0125122	-0.799999	0.0195313	-0.799999	0.0117188
-0.700001	-0.00701904	-0.799999	0.0359497	-0.700001	0.0078125	-0.700001	0	-0.700001	0.00469971	-0.599998	0.00469971	-0.700001	7.93457E-4	-0.700001	0.0195313	-0.700001	0.0117188
-0.600002	-0.00701904	-0.700001	0.03125	-0.600002	0.0078125	-0.600002	-0.00311279	-0.600002	0.00311279	-0.5	0.00701904	-0.600002	7.93457E-4	-0.600002	0.0195313	-0.600002	0.0117188
-0.5	-0.00701904	-0.599998	0.03125	-0.5	0.0078125	-0.5	-0.0078125	-0.5	0.0078125	-0.399998	0.00469971	-0.5	7.93457E-4	-0.5	0.0078125	-0.5	0.0117188
-0.400002	-0.0101318	-0.5	0.0148315	-0.400002	0.00469971	-0.400002	-0.0078125	-0.400002	0.0078125	-0.299999	0.0117188	-0.400002	-0.00701904	-0.400002	0.0078125	-0.400002	0.0117188
-0.299999	-2.27374E-13	-0.399998	0.0078125	-0.299999	0	-0.299999	-0.0078125	-0.299999	0.015625	-0.199997	0.0117188	-0.299999	-0.00701904	-0.299999	0.0078125	-0.299999	0.0117188
-0.200001	0.00158691	-0.299999	0.0078125	-0.200001	0	-0.200001	0	-0.200001	0.00469971	-0.0999985	0.0117188	-0.200001	-0.00701904	-0.200001	0.0078125	-0.200001	0
-0.100002	0.00469971	-0.200001	0.00469971	-0.100002	0	-0.100002	-0.00469971	-0.100002	0	0	0	-0.100002	-0.00231934	-0.100002	0	-0.100002	0
0	-2.27374E-13	-0.0999985	0	0	0	0	0	0	0	0.100002	0.0117188	0	-2.27374E-13	0	0	0	0
0.0999985	0.00469971	0	0	0.0999985	-0.00469971	0.0999985	0	0.0999985	0	0.200001	0.0117188	0.0999985	-0.00701904	0.0999985	-0.0117188	0.0999985	0
0.200001	0.00469971	0.100002	0	0.200001	-0.0117188	0.200001	0	0.200001	0.00311279	0.300003	0.0117188	0.200001	-0.0187378	0.200001	-0.00469971	0.200001	0
0.299999	0.00158691	0.200001	-0.0078125	0.299999	-0.0117188	0.299999	0	0.299999	0.0078125	0.400002	0.0148315	0.299999	-0.0187378	0.299999	-0.0234375	0.299999	-0.0078125
0.399998	-2.27374E-13	0.299999	-0.00469971	0.399998	-0.0117188	0.399998	-0.0117188	0.399998	0.0078125	0.5	0.0195313	0.399998	-0.0140381	0.399998	-0.0234375	0.399998	-0.0078125
0.5	0.00469971	0.400002	-0.0117188	0.5	-0.00311279	0.5	-0.0117188	0.5	0.0078125	0.600002	0.0078125	0.5	-0.0117188	0.5	-0.0265503	0.5	-0.0078125
0.599998	0.00939941	0.5	-0.0117188	0.599998	0	0.599998	-0.0195313	0.599998	0.015625	0.700001	0.0078125	0.599998	-0.0140381	0.599998	-0.0390625	0.599998	-0.0078125
0.700001	0.00469971	0.600002	-0.0117188	0.700001	0	0.700001	-0.0195313	0.700001	0.015625	0.800003	0.0078125	0.700001	-0.00701904	0.700001	-0.0507813	0.700001	-0.0195313
0.799999	0.0164185	0.700001	-0.0117188	0.799999	0	0.799999	-0.03125	0.799999	0.00469971	0.900002	0.00469971	0.799999	-0.0148315	0.799999	-0.0507813	0.799999	-0.0195313
0.899998	0.0164185	0.799999	-0.0117188	0.899998	0	0.899998	-0.03125	0.899998	0.0078125	1	0.0117188	0.899998	-0.0148315	0.899998	-0.0507813	0.899998	-0.0195313
1	0.0117188	0.900002	-0.0117188	1	-0.00469971	1	-0.0390625	1	0.0078125	1.1	0	1	-0.0148315	1	-0.0625	1	-0.0195313
1.1	0.0211182	1	-0.0117188	1.1	0	1.1	-0.0390625	1.1	0.0078125	1.2	0	1.1	-0.0265503	1.1	-0.0507813	1.1	-0.0273438
1.2	0.0234375	1.1	-0.0164185	1.2	0	1.2	-0.0507813	1.2	0.0078125	1.3	0	1.2	-0.0265503	1.2	-0.0507813	1.2	-0.0390625
1.3	0.024231	1.2	-0.03125	1.3	-0.00469971	1.3	-0.0507813	1.3	0.0078125	1.4	0	1.3	-0.0265503	1.3	-0.055481	1.3	-0.0390625
1.4	0.024231	1.3	-0.03125	1.4	-0.0117188	1.4	-0.0585938	1.4	0.0078125	1.5	-0.0078125	1.4	-0.0265503	1.4	-0.069519	1.4	-0.0390625
1.5	0.0211182	1.4	-0.03125	1.5	-0.0117188	1.5	-0.0703125	1.5	0.0078125	1.6	-0.0078125	1.5	-0.0265503	1.5	-0.0703125	1.5	-0.0507813
1.6	0.0281372	1.5	-0.0429688	1.6	-0.0148315	1.6	-0.0703125	1.6	0.0078125	1.7	-0.0078125	1.6	-0.038269	1.6	-0.0750122	1.6	-0.0507813
1.7	0.0234375	1.6	-0.0429688	1.7	-0.0195313	1.7	-0.0703125	1.7	0.0078125	1.8	-0.0078125	1.7	-0.038269	1.7	-0.09375	1.7	-0.055481
1.8	0.0164185	1.7	-0.0460815	1.8	-0.0195313	1.8	-0.0773315	1.8	0	1.9	-0.0078125	1.8	-0.0429688	1.8	-0.09375	1.8	-0.0703125
1.9	0.024231	1.8	-0.0507813	1.9	-0.024231	1.9	-0.0703125	1.9	0.0078125	2	-0.0195313	1.9	-0.0578003	1.9	-0.0820313	1.9	-0.0656128
2	0.0211182	1.9	-0.0585938	2	-0.0234375	2	-0.078125	2	0.0078125	2.1	-0.0195313	2	-0.0578003	2	-0.09375	2	-0.0585938
2.1	0.0164185	2	-0.0585938	2.1	-0.0234375	2.1	-0.078125	2.1	0.0078125	2.2	-0.0273438	2.1	-0.0578003	2.1	-0.09375	2.1	-0.0585938
2.2	0.0281372	2.1	-0.0585938	2.2	-0.0234375	2.2	-0.078125	2.2	0.0078125	2.3	-0.0273438	2.2	-0.0578003	2.2	-0.101563	2.2	-0.0585938
2.3	0.0234375	2.2	-0.0703125	2.3	-0.0234375	2.3	-0.0828247	2.3	0.0078125	2.4	-0.0273438	2.3	-0.0578003	2.3	-0.104675	2.3	-0.0585938
2.4	0.0164185	2.3	-0.0703125	2.4	-0.0234375	2.4	-0.101563	2.4	0.0078125	2.5	-0.0390625	2.4	-0.0742188	2.4	-0.121094	2.4	-0.0585938
2.5	0.024231	2.4	-0.0703125	2.5	-0.0234375	2.5	-0.101563	2.5	0	2.6	-0.0390625	2.5	-0.0765381	2.5	-0.121094	2.5	-0.055481
2.6	0.024231	2.5	-0.0671997	2.6	-0.0234375	2.6	-0.101563	2.6	-0.00469971	2.7	-0.0390625	2.6	-0.0742188	2.6	-0.121094	2.6	-0.0625
2.7	0.0195313	2.6	-0.0625	2.7	-0.0265503	2.7	-0.101563	2.7	-0.0117188	2.8	-0.0390625	2.7	-0.0890503	2.7	-0.125793	2.7	-0.0625
2.8	0.0125122	2.7	-0.0625	2.8	-0.0281372	2.8	-0.101563	2.8	-0.0234375	2.9	-0.0390625	2.8	-0.0890503	2.8	-0.135925	2.8	-0.0625
2.9	0.00939941	2.8	-0.0734253	2.9	-0.0265503	2.9	-0.101563	2.9	-0.0148315	3	-0.0359497	2.9	-0.0890503	2.9	-0.128906	2.9	-0.0625
3	0.0164185	2.9	-0.0703125	3	-0.0390625	3	-0.101563	3	-0.0195313	3.1	-0.0390625	3	-0.0890503	3	-0.140625	3	-0.0625
3.1	0.0164185	3	-0.0703125	3.1	-0.0390625	3.1	-0.101563	3.1	-0.0195313	3.2	-0.0343628	3.1	-0.0890503	3.1	-0.140625	3.1	-0.0625
3.2	0.0117188	3.1	-0.0703125	3.2	-0.0390625	3.2	-0.101563	3.2	-0.024231	3.3	-0.046875	3.2	-0.0890503	3.2	-0.140625	3.2	-0.0625
3.3	0.0164185	3.2	-0.0703125	3.3	-0.0390625	3.3	-0.101563	3.3	-0.03125	3.4	-0.0585938	3.3	-0.0890503	3.3	-0.140625	3.3	-0.0625
3.4	0.0211182	3.3	-0.0703125	3.4	-0.0507813	3.4	-0.0968628	3.4	-0.03125	3.5	-0.0585938	3.4	-0.0843506	3.4	-0.140625	3.4	-0.0703125
3.5	0.0164185	3.4	-0.0703125	3.5	-0.055481	3.5	-0.0898438	3.5	-0.0343628	3.6	-0.0632935	3.5	-0.0773315	3.5	-0.140625	3.5	-0.0703125
3.6	0.0164185	3.5	-0.078125	3.6	-0.0625	3.6	-0.0898438	3.6	-0.0507813	3.7	-0.0703125	3.6	-0.0773315	3.6	-0.140625	3.6	-0.0820313
3.7	0.0234375	3.6	-0.0750122	3.7	-0.0625	3.7	-0.0898438	3.7	-0.0507813	3.8	-0.0703125	3.7	-0.0773315	3.7	-0.145325	3.7	-0.0773315
3.8	0.024231	3.7	-0.0820313	3.8	-0.0625	3.8	-0.0976563	3.8	-0.055481	3.9	-0.0703125	3.8	-0.0773315	3.8	-0.159363	3.8	-0.0703125
3.9	0.024231	3.8	-0.0734253	3.9	-0.0625	3.9	-0.0976563	3.9	-0.0625	4	-0.078125	3.9	-0.069519	3.9	-0.160156	3.9	-0.0703125
4	0.0211182	3.9	-0.0750122	4	-0.0656128	4	-0.0976563	4	-0.0625	4.1	-0.078125	4	-0.069519	4	-0.157043	4	-0.0656128
4.1	0.0281372	4	-0.0703125	4.1	-0.0703125	4.1	-0.106262	4.1	-0.0703125	4.2	-0.078125	4.1	-0.0773315	4.1	-0.152344	4.1	-0.0664063
4.2	0.0234375	4.1	-0.0703125	4.2	-0.0703125	4.2	-0.101563	4.2	-0.0625	4.3	-0.0898438	4.2	-0.0773315	4.2	-0.152344	4.2	-0.078125
4.3	0.0117188	4.2	-0.0773315	4.3	-0.0828247	4.3	-0.121094	4.3	-0.0750122	4.4	-0.0898438	4.3	-0.0890503	4.3	-0.152344	4.3	-0.078125
4.4	0.00469971	4.3	-0.0703125	4.4	-0.0898438	4.4	-0.128906	4.4	-0.0890503	4.5	-0.101563	4.4	-0.0921631	4.4	-0.164063	4.4	-0.078125
4.5	0.00158691	4.4	-0.0703125	4.5	-0.101563	4.5	-0.140625	4.5	-0.0945435	4.6	-0.109375	4.5	-0.108582	4.5	-0.152344	4.5	-0.086731
4.6	-0.0078125	4.5	-0.0703125	4.6	-0.106262	4.6	-0.152344	4.6	-0.113281	4.7	-0.121094	4.6	-0.128113	4.6	-0.152344	4.6	-0.0820313
4.7	-0.0179443	4.6	-0.0820313	4.7	-0.132813	4.7	-0.147644	4.7	-0.125	4.8	-0.140625	4.7	-0.135925	4.7	-0.152344	4.7	-0.0820313
4.8	-0.0343628	4.7	-0.0820313	4.8	-0.155457	4.8	-0.148438	4.8	-0.132813	4.9	-0.135925	4.8	-0.135925	4.8	-0.152344	4.8	-0.0898438
4.9	-0.0421753	4.8	-0.0773315	4.9	-0.176575	4.9	-0.148438	4.9	-0.152344	5	-0.141418	4.9	-0.147644	4.9	-0.152344	4.9	-0.0898438
5	-0.0585938	4.9	-0.078125	5	-0.194519	5	-0.160156	5	-0.164063	5.1	-0.160156	5	-0.155457	5	-0.164063	5	-0.101563
5.1	-0.085144	5	-0.078125	5.1	-0.222656	5.1	-0.160156	5.1	-0.171875	5.2	-0.163269	5.1	-0.167175	5.1	-0.152344	5.1	-0.121094
5.2	-0.0968628	5.1	-0.086731	5.2	-0.246887	5.2	-0.167969	5.2	-0.191406	5.3	-0.167969	5.2	-0.174988	5.2	-0.164063	5.2	-0.140625
5.3	-0.119507	5.2	-0.0898438	5.3	-0.261719	5.3	-0.179688	5.3	-0.203125	5.4	-0.179688	5.3	-0.191406	5.3	-0.171875	5.3	-0.163269
5.4	-0.132019	5.3	-0.101563	5.4	-0.28125	5.4	-0.184387	5.4	-0.225769	5.5	-0.184387	5.4	-0.217957	5.4	-0.183594	5.4	-0.176575
5.5	-0.15155	5.4	-0.121094	5.5	-0.296082	5.5	-0.1828	5.5	-0.25	5.6	-0.179688	5.5	-0.237488	5.5	-0.183594	5.5	-0.1828
5.6	-0.1875	5.5	-0.121094	5.6	-0.320313	5.6	-0.199219	5.6	-0.261719	5.7	-0.194519	5.6	-0.249207	5.6	-0.194519	5.6	-0.207031
5.7	-0.21405	5.6	-0.128113	5.7	-0.332031	5.7	-0.199219	5.7	-0.28125	5.8	-0.207031	5.7	-0.249207	5.7	-0.210938	5.7	-0.226563
5.8	-0.236694	5.7	-0.133606	5.8	-0.339844	5.8	-0.21875	5.8	-0.28595	5.9	-0.21875	5.8	-0.257019	5.8	-0.21875	5.8	-0.242981
5.9	-0.272644	5.8	-0.147644	5.9	-0.364075	5.9	-0.230469	5.9	-0.292969	6	-0.235168	5.9	-0.268738	5.9	-0.230469	5.9	-0.269531
6	-0.308594	5.9	-0.148438	6	-0.382813	6	-0.238281	6	-0.315613	6.1	-0.242188	6	-0.288269	6	-0.230469	6	-0.28125
6.1	-0.335144	6	-0.160156	6.1	-0.402344	6.1	-0.25	6.1	-0.332031	6.2	-0.261719	6.1	-0.299988	6.1	-0.246887	6.1	-0.308594
6.2	-0.362488	6.1	-0.167969	6.2	-0.421875	6.2	-0.257813	6.2	-0.339844	6.3	-0.269531	6.2	-0.3078	6.2	-0.242188	6.2	-0.320313
6.3	-0.390625	6.2	-0.179688	6.3	-0.441406	6.3	-0.269531	6.3	-0.364075	6.4	-0.28125	6.3	-0.319519	6.3	-0.242188	6.3	-0.339844
6.4	-0.417175	6.3	-0.199219	6.4	-0.453125	6.4	-0.277344	6.4	-0.382813	6.5	-0.292175	6.4	-0.327332	6.4	-0.253906	6.4	-0.371094
6.5	-0.439819	6.4	-0.210938	6.5	-0.472656	6.5	-0.289063	6.5	-0.389832	6.6	-0.332825	6.5	-0.346863	6.5	-0.261719	6.5	-0.390625
6.6	-0.46405	6.5	-0.21875	6.6	-0.492188	6.6	-0.308594	6.6	-0.390625	6.7	-0.339844	6.6	-0.358582	6.6	-0.28125	6.6	-0.410156
6.7	-0.5	6.6	-0.238281	6.7	-0.511719	6.7	-0.320313	6.7	-0.402344	6.8	-0.359375	6.7	-0.3703	6.7	-0.292969	6.7	-0.429688
6.8	-0.52655	6.7	-0.25	6.8	-0.53125	6.8	-0.328125	6.8	-0.421875	6.9	-0.371094	6.8	-0.378113	6.8	-0.292969	6.8	-0.449219
6.9	-0.549194	6.8	-0.257813	6.9	-0.542969	6.9	-0.344543	6.9	-0.429688	7	-0.390625	6.9	-0.397644	6.9	-0.304688	6.9	-0.449219
7	-0.573425	6.9	-0.269531	7	-0.550781	7	-0.359375	7	-0.441406	7.1	-0.390625	7	-0.397644	7	-0.324219	7	-0.46875
7.1	-0.604675	7	-0.289063	7.1	-0.565613	7.1	-0.371094	7.1	-0.457825	7.2	-0.398438	7.1	-0.409363	7.1	-0.332031	7.1	-0.488281
7.2	-0.612488	7.1	-0.300781	7.2	-0.582031	7.2	-0.378906	7.2	-0.464844	7.3	-0.413269	7.2	-0.421875	7.2	-0.34375	7.2	-0.511719
7.3	-0.628906	7.2	-0.308594	7.3	-0.589844	7.3	-0.390625	7.3	-0.472656	7.4	-0.417969	7.3	-0.428894	7.3	-0.351563	7.3	-0.539063
7.4	-0.650757	7.3	-0.308594	7.4	-0.589844	7.4	-0.402344	7.4	-0.487488	7.5	-0.417969	7.4	-0.440613	7.4	-0.363281	7.4	-0.570313
7.5	-0.663269	7.4	-0.320313	7.5	-0.606262	7.5	-0.410156	7.5	-0.480469	7.6	-0.4375	7.5	-0.440613	7.5	-0.366394	7.5	-0.589844
7.6	-0.663269	7.5	-0.325012	7.6	-0.621094	7.6	-0.421875	7.6	-0.480469	7.7	-0.453918	7.6	-0.440613	7.6	-0.378906	7.6	-0.609375
7.7	-0.674988	7.6	-0.339844	7.7	-0.621094	7.7	-0.429688	7.7	-0.480469	7.8	-0.480469	7.7	-0.435913	7.7	-0.383606	7.7	-0.609375
7.8	-0.674988	7.7	-0.351563	7.8	-0.632813	7.8	-0.444519	7.8	-0.496887	7.9	-0.480469	7.8	-0.428894	7.8	-0.414063	7.8	-0.609375
7.9	-0.65155	7.8	-0.359375	7.9	-0.635925	7.9	-0.453918	7.9	-0.503906	8	-0.488281	7.9	-0.436707	7.9	-0.402344	7.9	-0.609375
8	-0.643738	7.9	-0.359375	8	-0.628906	8	-0.449219	8	-0.492188	8.1	-0.480469	8	-0.448425	8	-0.414063	8	-0.609375
8.1	-0.643738	8	-0.371094	8.1	-0.621094	8.1	-0.460938	8.1	-0.479675	8.2	-0.480469	8.1	-0.448425	8.1	-0.421875	8.1	-0.601563
8.2	-0.632019	8.1	-0.366394	8.2	-0.609375	8.2	-0.441406	8.2	-0.460938	8.3	-0.46875	8.2	-0.448425	8.2	-0.414063	8.2	-0.601563
8.3	-0.624207	8.2	-0.364075	8.3	-0.589844	8.3	-0.441406	8.3	-0.465637	8.4	-0.46875	8.3	-0.448425	8.3	-0.414063	8.3	-0.592957
8.4	-0.604675	8.3	-0.371094	8.4	-0.578125	8.4	-0.441406	8.4	-0.460144	8.5	-0.460938	8.4	-0.448425	8.4	-0.414063	8.4	-0.575012
8.5	-0.592957	8.4	-0.371094	8.5	-0.575012	8.5	-0.441406	8.5	-0.441406	8.6	-0.453918	8.5	-0.443726	8.5	-0.397644	8.5	-0.570313
8.6	-0.592957	8.5	-0.359375	8.6	-0.5625	8.6	-0.441406	8.6	-0.441406	8.7	-0.449219	8.6	-0.441406	8.6	-0.395325	8.6	-0.558594
8.7	-0.578125	8.6	-0.351563	8.7	-0.550781	8.7	-0.441406	8.7	-0.436707	8.8	-0.441406	8.7	-0.448425	8.7	-0.390625	8.7	-0.558594
8.8	-0.580444	8.7	-0.351563	8.8	-0.53595	8.8	-0.441406	8.8	-0.422668	8.9	-0.424988	8.8	-0.436707	8.8	-0.390625	8.8	-0.550781
8.9	-0.573425	8.8	-0.339844	8.9	-0.542969	8.9	-0.441406	8.9	-0.421875	9	-0.422668	8.9	-0.436707	8.9	-0.382813	8.9	-0.539063
9	-0.566406	8.9	-0.339844	9	-0.52655	9	-0.441406	9	-0.417175	9.1	-0.421875	9	-0.436707	9	-0.382813	9	-0.539063
9.1	-0.565613	9	-0.339844	9.1	-0.53125	9.1	-0.441406	9.1	-0.410156	9.2	-0.421875	9.1	-0.436707	9.1	-0.382813	9.1	-0.534363
9.2	-0.553894	9.1	-0.342957	9.2	-0.511719	9.2	-0.441406	9.2	-0.398438	9.3	-0.410156	9.2	-0.436707	9.2	-0.382813	9.2	-0.524231
9.3	-0.546082	9.2	-0.339844	9.3	-0.492188	9.3	-0.444519	9.3	-0.387512	9.4	-0.405457	9.3	-0.428894	9.3	-0.371094	9.3	-0.53125
9.4	-0.529663	9.3	-0.328125	9.4	-0.485168	9.4	-0.4375	9.4	-0.385925	9.5	-0.398438	9.4	-0.433594	9.4	-0.363281	9.4	-0.511719
9.5	-0.507813	9.4	-0.332825	9.5	-0.460938	9.5	-0.4375	9.5	-0.378906	9.6	-0.359375	9.5	-0.440613	9.5	-0.354675	9.5	-0.511719
9.6	-0.502319	9.5	-0.320313	9.6	-0.428894	9.6	-0.426575	9.6	-0.375793	9.7	-0.344543	9.6	-0.416382	9.6	-0.359375	9.6	-0.4953
9.7	-0.46405	9.6	-0.308594	9.7	-0.402344	9.7	-0.410156	9.7	-0.382813	9.8	-0.3125	9.7	-0.409363	9.7	-0.356262	9.7	-0.507813
9.8	-0.46405	9.7	-0.28125	9.8	-0.375793	9.8	-0.402344	9.8	-0.371094	9.9	-0.28125	9.8	-0.402344	9.8	-0.351563	9.8	-0.492981
9.9	-0.4328	9.8	-0.269531	9.9	-0.363281	9.9	-0.390625	9.9	-0.375793	10	-0.253113	9.9	-0.392944	9.9	-0.332031	9.9	-0.480469
10	-0.424988	9.9	-0.25	10	-0.332031	10	-0.382019	10	-0.363281	10.1	-0.238281	10	-0.389832	10	-0.3172	10	-0.460938
10.1	-0.413269	10	-0.261719	10.1	-0.300781	10.1	-0.386719	10.1	-0.34375	10.2	-0.2547	10.1	-0.378113	10.1	-0.304688	10.1	-0.452332
10.2	-0.424988	10.1	-0.2547	10.2	-0.27655	10.2	-0.383606	10.2	-0.324219	10.3	-0.230469	10.2	-0.366394	10.2	-0.296082	10.2	-0.449219
10.3	-0.413269	10.2	-0.284363	10.3	-0.28125	10.3	-0.390625	10.3	-0.3125	10.4	-0.238281	10.3	-0.366394	10.3	-0.297668	10.3	-0.434387
10.4	-0.424988	10.3	-0.28595	10.4	-0.269531	10.4	-0.390625	10.4	-0.315613	10.5	-0.25	10.4	-0.363281	10.4	-0.261719	10.4	-0.429688
10.5	-0.4328	10.4	-0.273438	10.5	-0.28595	10.5	-0.410156	10.5	-0.3125	10.6	-0.238281	10.5	-0.373413	10.5	-0.273438	10.5	-0.449219
10.6	-0.4328	10.5	-0.284363	10.6	-0.315613	10.6	-0.410156	10.6	-0.325012	10.7	-0.246094	10.6	-0.355469	10.6	-0.280457	10.6	-0.429688
10.7	-0.4328	10.6	-0.28125	10.7	-0.336731	10.7	-0.429688	10.7	-0.319519	10.8	-0.25	10.7	-0.3703	10.7	-0.242188	10.7	-0.398438
10.8	-0.421875	10.7	-0.269531	10.8	-0.327332	10.8	-0.441406	10.8	-0.320313	10.9	-0.238281	10.8	-0.392944	10.8	-0.246887	10.8	-0.398438
10.9	-0.417175	10.8	-0.2547	10.9	-0.308594	10.9	-0.449219	10.9	-0.3172	11	-0.269531	10.9	-0.397644	10.9	-0.253906	10.9	-0.378906
11	-0.420288	10.9	-0.2453	11	-0.325012	11	-0.460938	11	-0.315613	11.1	-0.264832	11	-0.421875	11	-0.273438	11	-0.371094
11.1	-0.421875	11	-0.21875	11.1	-0.366394	11.1	-0.460938	11.1	-0.313293	11.2	-0.293762	11.1	-0.443726	11.1	-0.27655	11.1	-0.308594
11.2	-0.397644	11.1	-0.191406	11.2	-0.378906	11.2	-0.46875	11.2	-0.315613	11.3	-0.328125	11.2	-0.448425	11.2	-0.28125	11.2	-0.300781
11.3	-0.389038	11.2	-0.164856	11.3	-0.269531	11.3	-0.487488	11.3	-0.305481	11.4	-0.354675	11.3	-0.472656	11.3	-0.269531	11.3	-0.261719
11.4	-0.413269	11.3	-0.0898438	11.4	-0.179688	11.4	-0.485168	11.4	-0.28125	11.5	-0.352356	11.4	-0.479675	11.4	-0.25	11.4	-0.261719
11.5	-0.452332	11.4	-0.0703125	11.5	-0.351563	11.5	-0.519531	11.5	-0.222656	11.6	-0.424988	11.5	-0.502319	11.5	-0.269531	11.5	-0.335144
11.6	-0.483582	11.5	-0.171875	11.6	-0.485168	11.6	-0.5625	11.6	-0.2547	11.7	-0.398438	11.6	-0.397644	11.6	-0.239075	11.6	-0.507813
11.7	-0.699219	11.6	-0.222656	11.7	-0.691406	11.7	-0.492188	11.7	-0.324219	11.8	-0.66095	11.7	-0.878113	11.7	-0.164063	11.7	-0.543762
11.8	-1.06561	11.7	-0.514832	11.8	-0.984375	11.8	-1.01483	11.8	-0.655457	11.9	-1.41797	11.8	-1.34686	11.8	-0.389832	11.8	-0.78125
11.9	-1.68671	11.8	-1.23126	11.9	-1.74219	11.9	-1.88672	11.9	-1.21173	12	-2.6922	11.9	-2.18359	11.9	-0.953918	11.9	-1.75702
12	-2.85779	11.9	-1.80859	12	-2.30078	12	-2.29688	12	-1.99298	12.1	-3.97656	12	-3.20624	12	-1.7453	12	-2.4375
12.1	-3.57422	12	-2.51251	12.1	-1.17499	12.1	-1.09766	12.1	-2.11639	12.2	-4.51251	12.1	-3.43359	12.1	-2.15234	12.1	-1.05548
12.2	-3.32733	12.1	-1.91016	12.2	3.54218	12.2	3.69452	12.2	0.206238	12.3	-3.53436	12.2	-2.39218	12.2	-0.383606	12.2	3.37579
12.3	-1.19531	12.2	2.06561	12.3	12.5547	12.3	12.0703	12.3	5.79376	12.4	-0.664063	12.3	1.03516	12.3	4.78906	12.3	11.5938
12.4	3.375	12.3	9.16486	12.4	25.2078	12.4	23.9063	12.4	15.1523	12.5	4.13281	12.4	7.27502	12.4	13.9695	12.4	22.7305
12.5	10.2899	12.4	19.3687	12.5	40.6852	12.5	38.4656	12.5	27.3508	12.6	10.9953	12.5	15.736	12.5	26.4375	12.5	36.2586
12.6	20.0766	12.5	32.1633	12.6	58.218	12.6	55.0281	12.6	42.0258	12.7	19.9734	12.6	26.6164	12.6	41.3453	12.6	51.0383
12.7	32.2586	12.6	46.293	12.7	77.3883	12.7	73.2523	12.7	58.1422	12.8	31.3461	12.7	39.7445	12.7	58.2188	12.7	67.5922
12.8	46.2367	12.7	62.1523	12.8	98.1594	12.8	93.0851	12.8	75.4766	12.9	44.6047	12.8	55.0219	12.8	76.9742	12.8	85.1414
12.9	63.018	12.8	79.6437	12.9	120.863	12.9	115.02	12.9	94.7227	13	60.1086	12.9	72.7961	12.9	97.6008	12.9	104.288
13	81.8406	12.9	98.3687	13	144.204	13	137.651	13	115.608	13.1	77.343	13	92.2781	13	119.842	13	124.216
13.1	102.102	13	118.166	13.1	163.013	13.1	156.355	13.1	135.573	13.2	94.4484	13.1	112.641	13.1	141.139	13.1	139.096
13.2	122.879	13.1	134.159	13.2	171.045	13.2	165.36	13.2	149.216	13.3	109.184	13.2	131.71	13.2	156.702	13.2	142.698
13.3	142.295	13.2	141.434	13.3	169.971	13.3	167.34	13.3	152.805	13.4	121.252	13.3	147.645	13.3	162.42	13.3	137.527
13.4	159.002	13.3	140.486	13.4	165.998	13.4	167.268	13.4	150.517	13.5	130.237	13.4	160.492	13.4	162.376	13.4	130.422
13.5	171.713	13.4	137.157	13.5	162.973	13.5	167.405	13.5	147.85	13.6	136.55	13.5	169.959	13.5	161.218	13.5	124.303
13.6	180.641	13.5	134.105	13.6	160.393	13.6	167.716	13.6	146.333	13.7	140.246	13.6	176.136	13.6	160.286	13.6	119.588
13.7	186.676	13.6	131.261	13.7	157.556	13.7	167.339	13.7	145.042	13.8	141.705	13.7	179.79	13.7	159.056	13.7	114.946
13.8	190.12	13.7	128.068	13.8	154.261	13.8	165.898	13.8	143.661	13.9	141.668	13.8	181.045	13.8	157.163	13.8	110.522
13.9	191.389	13.8	124.32	13.9	150.163	13.9	163.966	13.9	141.638	14	140.53	13.9	180.706	13.9	154.477	13.9	105.544
14	192.267	13.9	120.259	14	146.195	14	161.925	14	139.063	14.1	138.598	14	179.43	14	150.706	14	100.857
14.1	191.789	14	115.641	14.1	142.234	14.1	159.047	14.1	136.568	14.2	136.112	14.1	177.488	14.1	146.771	14.1	96.0234
14.2	190.983	14.1	111.241	14.2	138.48	14.2	156.504	14.2	133.572	14.3	133.441	14.2	175.472	14.2	142.759	14.2	91.1844
14.3	190.216	14.2	106.843	14.3	135.023	14.3	154.131	14.3	131.116	14.4	130.561	14.3	172.943	14.3	139.145	14.3	86.8844
14.4	189.825	14.3	102.416	14.4	131.953	14.4	152.039	14.4	128.573	14.5	127.827	14.4	170.946	14.4	135.444	14.4	82.7148
14.5	189.622	14.4	98.6227	14.5	129.362	14.5	150.562	14.5	126.364	14.6	125.277	14.5	169.073	14.5	132.078	14.5	78.7539
14.6	189.82	14.5	94.8766	14.6	127.216	14.6	148.968	14.6	124.611	14.7	122.824	14.6	167.405	14.6	129.406	14.6	75.1758
14.7	190.363	14.6	91.55	14.7	125.581	14.7	148.211	14.7	122.977	14.8	120.477	14.7	166.299	14.7	127.005	14.7	72.0875
14.8	191.752	14.7	88.5625	14.8	124.448	14.8	148.071	14.8	121.82	14.9	118.4	14.8	165.576	14.8	125.098	14.8	68.925
14.9	193.608	14.8	86.0859	14.9	123.851	14.9	148.355	14.9	121.222	15	116.643	14.9	165.272	14.9	123.867	14.9	66.1875
15	195.934	14.9	83.7133	15	123.554	15	149.188	15	120.766	15.1	115.271	15	165.394	15	122.957	15	63.7726
15.1	199.044	15	81.7547	15.1	123.635	15.1	150.65	15.1	120.503	15.2	113.887	15.1	165.895	15.1	122.233	15.1	61.1766
15.2	203.047	15.1	80.4078	15.2	124.332	15.2	152.684	15.2	120.738	15.3	112.755	15.2	166.843	15.2	122.152	15.2	58.9656
15.3	207.443	15.2	79.0344	15.3	125.43	15.3	155.344	15.3	121.497	15.4	111.973	15.3	168.405	15.3	122.412	15.3	56.8789
15.4	212.675	15.3	78.4953	15.4	126.825	15.4	158.593	15.4	122.482	15.5	111.484	15.4	170.354	15.4	123.084	15.4	55.1852
15.5	218.827	15.4	78.4078	15.5	128.813	15.5	162.494	15.5	123.556	15.6	111.473	15.5	172.692	15.5	124.435	15.5	53.5289
15.6	225.653	15.5	78.1336	15.6	131.097	15.6	167.17	15.6	125.361	15.7	111.777	15.6	175.405	15.6	126.444	15.6	51.9406
15.7	233.063	15.6	78.8	15.7	133.703	15.7	172.272	15.7	127.499	15.8	112.338	15.7	178.673	15.7	128.502	15.7	50.5719
15.8	241.368	15.7	79.6156	15.8	136.548	15.8	177.969	15.8	129.855	15.9	113.384	15.8	182.374	15.8	130.996	15.8	49.3266
15.9	250.309	15.8	81.2031	15.9	140.001	15.9	184.502	15.9	132.624	16	114.656	15.9	186.336	15.9	134.025	15.9	48.3875
16	259.932	15.9	82.8773	16	144.168	16	191.643	16	135.744	16.1	116.391	16	190.823	16	137.497	16	47.2984
16.1	270.087	16	84.8008	16.1	148.327	16.1	199.405	16.1	139.17	16.2	118.577	16.1	195.79	16.1	141.44	16.1	46.3695
16.2	281.56	16.1	87.3976	16.2	153.038	16.2	207.64	16.2	143.063	16.3	121.031	16.2	201.613	16.2	145.87	16.2	45.8953
16.3	293.206	16.2	90.3398	16.3	157.942	16.3	216.221	16.3	147.236	16.4	123.944	16.3	207.623	16.3	150.767	16.3	45.0078
16.4	305.507	16.3	93.6727	16.4	163.315	16.4	225.473	16.4	151.759	16.5	127.391	16.4	214.087	16.4	155.873	16.4	44.2828
16.5	318.307	16.4	97.4023	16.5	169.18	16.5	235.324	16.5	156.557	16.6	131.127	16.5	221.064	16.5	161.476	16.5	43.868
16.6	331.945	16.5	101.364	16.6	175.399	16.6	245.644	16.6	161.784	16.7	135.141	16.6	228.207	16.6	167.494	16.6	43.4539
16.7	346.131	16.6	105.728	16.7	181.72	16.7	256.419	16.7	167.372	16.8	139.792	16.7	236.239	16.7	173.905	16.7	43.3203
16.8	360.931	16.7	110.098	16.8	188.491	16.8	267.461	16.8	173.158	16.9	144.663	16.8	244.639	16.8	180.729	16.8	43.5914
16.9	376.409	16.8	115.033	16.9	195.683	16.9	278.963	16.9	179.269	17	150.02	16.9	253.318	16.9	187.941	16.9	43.8883
17	392.213	16.9	120.302	17	203.22	17	290.917	17	185.903	17.1	156.08	17	262.302	17	195.545	17	44.0531
17.1	408.503	17	125.811	17.1	211.112	17.1	303.086	17.1	192.797	17.2	162.314	17.1	271.957	17.1	203.505	17.1	44.3008
17.2	425.248	17.1	131.194	17.2	219.179	17.2	315.625	17.2	199.989	17.3	168.971	17.2	281.941	17.2	211.781	17.2	44.7617
17.3	442.505	17.2	136.977	17.3	227.49	17.3	328.405	17.3	207.39	17.4	176.248	17.3	292.342	17.3	220.204	17.3	45.4266
17.4	460.13	17.3	142.964	17.4	236.116	17.4	341.091	17.4	215.167	17.5	183.426	17.4	303.173	17.4	228.847	17.4	46.3039
17.5	477.943	17.4	149.221	17.5	245.177	17.5	354.183	17.5	223.287	17.6	191.428	17.5	314.343	17.5	238.038	17.5	47.3875
17.6	496.272	17.5	155.254	17.6	254.771	17.6	367.456	17.6	231.523	17.7	199.663	17.6	325.967	17.6	247.476	17.6	48.5602
17.7	514.689	17.6	161.511	17.7	264.662	17.7	380.741	17.7	240.23	17.8	208.345	17.7	337.936	17.7	257.098	17.7	49.7883
17.8	533.555	17.7	168.055	17.8	274.664	17.8	394.382	17.8	249.237	17.9	217.278	17.8	350.354	17.8	266.973	17.8	51.3109
17.9	552.627	17.8	174.763	17.9	284.936	17.9	408.161	17.9	258.38	18	226.541	17.9	363.148	17.9	276.977	17.9	53.0851
18	571.819	17.9	181.299	18	295.257	18	422.108	18	267.799	18.1	236.334	18	376.109	18	287.228	18	54.9453
18.1	591.175	18	187.789	18.1	306.073	18.1	435.594	18.1	277.345	18.2	246.492	18.1	389.29	18.1	297.575	18.1	56.9086
18.2	610.717	18.1	194.041	18.2	317.053	18.2	449.21	18.2	287.304	18.3	256.944	18.2	402.862	18.2	308.103	18.2	59.0977
18.3	630.352	18.2	200.652	18.3	328.317	18.3	463.01	18.3	297.548	18.4	267.666	18.3	416.787	18.3	318.837	18.3	61.4578
18.4	650.091	18.3	207.13	18.4	339.763	18.4	476.545	18.4	307.98	18.5	278.548	18.4	431.002	18.4	329.774	18.4	63.857
18.5	669.867	18.4	213.58	18.5	351.373	18.5	490.247	18.5	318.495	18.6	289.898	18.5	445.516	18.5	340.614	18.5	66.5078
18.6	689.995	18.5	219.712	18.6	363.239	18.6	504.014	18.6	329.229	18.7	301.339	18.6	460.458	18.6	351.587	18.6	69.3953
18.7	710.016	18.6	226.066	18.7	375.339	18.7	517.679	18.7	340.31	18.8	313.011	18.7	475.506	18.7	362.977	18.7	72.4211
18.8	729.9	18.7	232.327	18.8	387.551	18.8	531.348	18.8	351.529	18.9	324.984	18.8	490.668	18.8	374.182	18.8	75.7305
18.9	749.798	18.8	238.666	18.9	399.986	18.9	544.852	18.9	362.897	19	337.241	18.9	506.041	18.9	385.218	18.9	78.9859
19	769.82	18.9	244.942	19	412.602	19	558.106	19	374.418	19.1	349.732	19	521.716	19	396.67	19	82.3836
19.1	789.76	19	250.884	19.1	425.392	19.1	571.163	19.1	386.068	19.2	362.444	19.1	537.609	19.1	407.884	19.1	85.9836
19.2	809.763	19.1	256.768	19.2	438.377	19.2	584.655	19.2	397.894	19.3	375.289	19.2	553.609	19.2	419.248	19.2	89.7789
19.3	829.702	19.2	262.745	19.3	451.386	19.3	597.659	19.3	409.963	19.4	388.231	19.3	569.805	19.3	430.606	19.3	93.8719
19.4	849.577	19.3	268.66	19.4	464.567	19.4	610.469	19.4	422.242	19.5	401.383	19.4	586.209	19.4	441.894	19.4	98.1172
19.5	869.534	19.4	274.073	19.5	477.88	19.5	623.363	19.5	434.679	19.6	414.703	19.5	602.559	19.5	453.118	19.5	102.511
19.6	889.144	19.5	279.801	19.6	491.347	19.6	635.991	19.6	447.174	19.7	428.052	19.6	619.232	19.6	464.622	19.6	107.002
19.7	908.671	19.6	285.223	19.7	504.874	19.7	648.399	19.7	459.889	19.8	441.483	19.7	635.973	19.7	475.422	19.7	111.605
19.8	928.22	19.7	290.427	19.8	518.481	19.8	660.908	19.8	472.623	19.9	455.153	19.8	652.752	19.8	486.421	19.8	116.402
19.9	947.719	19.8	295.587	19.9	532.225	19.9	672.998	19.9	485.382	20	468.895	19.9	669.577	19.9	497.573	19.9	121.448
20	967.143	19.9	300.793	20	546.054	20	685.239	20	498.537	20.1	482.747	20	686.433	20	508.589	20	126.54
20.1	986.603	20	305.744	20.1	559.937	20.1	696.994	20.1	511.609	20.2	496.848	20.1	703.259	20.1	519.348	20.1	131.808
20.2	1005.95	20.1	310.678	20.2	573.82	20.2	708.721	20.2	524.751	20.3	510.808	20.2	720.173	20.2	529.954	20.2	137.148
20.3	1025	20.2	315.517	20.3	587.72	20.3	720.352	20.3	538.024	20.4	524.704	20.3	737.085	20.3	540.623	20.3	142.655
20.4	1044.25	20.3	320.237	20.4	601.76	20.4	731.732	20.4	551.416	20.5	538.974	20.4	754.141	20.4	551.026	20.4	148.482
20.5	1063.21	20.4	324.678	20.5	615.779	20.5	743.063	20.5	564.836	20.6	552.815	20.5	771.295	20.5	561.554	20.5	154.37
20.6	1081.96	20.5	329.104	20.6	629.834	20.6	753.937	20.6	578.261	20.7	566.738	20.6	788.155	20.6	572.046	20.6	160.396
20.7	1100.77	20.6	333.483	20.7	643.962	20.7	764.82	20.7	591.642	20.8	580.735	20.7	805.261	20.7	582.174	20.7	166.493
20.8	1119.52	20.7	337.74	20.8	658.044	20.8	775.541	20.8	605.067	20.9	594.778	20.8	822.211	20.8	592.164	20.8	172.777
20.9	1138.14	20.8	341.929	20.9	672.129	20.9	785.859	20.9	618.555	21	608.751	20.9	839.231	20.9	601.987	20.9	179.135
21	1156.31	20.9	346.074	21	686.213	21	796.106	21	632.136	21.1	622.745	21	856.187	21	611.652	21	185.636
21.1	1174.64	21	349.924	21.1	700.377	21.1	806.137	21.1	645.805	21.2	636.662	21.1	872.88	21.1	621.317	21.1	192.257
21.2	1192.68	21.1	353.82	21.2	714.549	21.2	816.084	21.2	659.615	21.3	650.698	21.2	889.561	21.2	630.891	21.2	199.032
21.3	1210.5	21.2	357.57	21.3	728.609	21.3	825.938	21.3	673.37	21.4	664.574	21.3	906.244	21.3	640.191	21.3	205.986
21.4	1228.34	21.3	361.312	21.4	742.71	21.4	835.458	21.4	687.134	21.5	678.245	21.4	922.961	21.4	649.568	21.4	212.935
21.5	1245.82	21.4	364.75	21.5	756.8	21.5	844.912	21.5	700.773	21.6	691.923	21.5	939.552	21.5	658.572	21.5	219.962
21.6	1263.16	21.5	368.148	21.6	770.827	21.6	854.105	21.6	714.405	21.7	705.884	21.6	956.07	21.6	667.382	21.6	227.003
21.7	1280.53	21.6	371.52	21.7	784.75	21.7	862.938	21.7	728.101	21.8	719.399	21.7	972.545	21.7	676.299	21.7	234.212
21.8	1297.84	21.7	374.809	21.8	798.661	21.8	871.862	21.8	741.758	21.9	732.716	21.8	988.841	21.8	684.861	21.8	241.967
21.9	1314.73	21.8	378.117	21.9	812.608	21.9	880.408	21.9	755.422	22	746.276	21.9	1005.19	21.9	693.144	21.9	249.689
22	1331.55	21.9	381.37	22	826.545	22	889.032	22	769.162	22.1	759.299	22	1021.33	22	701.463	22	257.335
22.1	1348.35	22	384.38	22.1	840.458	22.1	897.1	22.1	782.661	22.2	772.595	22.1	1037.47	22.1	709.301	22.1	265.004
22.2	1364.57	22.1	387.426	22.2	854.347	22.2	905.204	22.2	796.216	22.3	785.784	22.2	1053.61	22.2	717.228	22.2	272.867
22.3	1380.95	22.2	390.234	22.3	868.255	22.3	913.181	22.3	809.686	22.4	798.938	22.3	1069.67	22.3	724.934	22.3	280.77
22.4	1397.14	22.3	392.953	22.4	881.776	22.4	920.723	22.4	823.127	22.5	811.809	22.4	1085.33	22.4	732.538	22.4	288.696
22.5	1412.99	22.4	395.773	22.5	895.373	22.5	928.407	22.5	836.588	22.6	824.675	22.5	1101.1	22.5	739.98	22.5	296.73
22.6	1428.6	22.5	398.451	22.6	909.094	22.6	935.713	22.6	850.027	22.7	837.336	22.6	1116.52	22.6	747.364	22.6	304.873
22.7	1444.19	22.6	401.031	22.7	922.651	22.7	942.975	22.7	863.516	22.8	849.968	22.7	1131.85	22.7	754.683	22.7	313.015
22.8	1459.57	22.7	403.595	22.8	936.17	22.8	949.927	22.8	876.816	22.9	862.446	22.8	1147.24	22.8	761.712	22.8	321.249
22.9	1474.74	22.8	406.07	22.9	949.387	22.9	956.687	22.9	890.231	23	874.625	22.9	1162.31	22.9	768.466	22.9	329.548
23	1489.82	22.9	408.423	23	962.652	23	963.463	23	903.407	23.1	886.668	23	1177.09	23	775.115	23	337.967
23.1	1504.38	23	410.728	23.1	975.945	23.1	969.838	23.1	916.575	23.2	898.783	23.1	1191.88	23.1	781.831	23.1	346.446
23.2	1518.78	23.1	413.055	23.2	989.21	23.2	976.104	23.2	929.709	23.3	910.809	23.2	1206.87	23.2	788.158	23.2	354.96
23.3	1533.51	23.2	415.274	23.3	1002.38	23.3	982.216	23.3	942.777	23.4	922.469	23.3	1221.32	23.3	794.369	23.3	363.504
23.4	1547.55	23.3	417.462	23.4	1015.32	23.4	988.285	23.4	955.755	23.5	933.986	23.4	1235.81	23.4	800.697	23.4	372.089
23.5	1561.65	23.4	419.605	23.5	1028.31	23.5	994.483	23.5	968.723	23.6	945.573	23.5	1250.21	23.5	806.653	23.5	380.742
23.6	1575.66	23.5	421.666	23.6	1041.37	23.6	1000.3	23.6	981.593	23.7	957.088	23.6	1264.37	23.6	812.556	23.6	389.332
23.7	1589.03	23.6	423.654	23.7	1053.86	23.7	1006.06	23.7	994.531	23.8	968.005	23.7	1278.21	23.7	818.344	23.7	397.962
23.8	1602.31	23.7	425.579	23.8	1066.83	23.8	1011.47	23.8	1007.46	23.9	979.365	23.8	1292.07	23.8	823.596	23.8	406.595
23.9	1615.67	23.8	427.509	23.9	1079.68	23.9	1016.81	23.9	1020.19	24	990.152	23.9	1305.61	23.9	829.077	23.9	415.292
24	1628.61	23.9	429.392	24	1092.47	24	1022.11	24	1032.91	24.1	1000.93	24	1319.23	24	834.525	24	424.124
24.1	1641.24	24	431.283	24.1	1104.95	24.1	1027.23	24.1	1045.09	24.2	1011.65	24.1	1332.5	24.1	839.685	24.1	432.877
24.2	1653.77	24.1	433.095	24.2	1117.49	24.2	1032.46	24.2	1057.51	24.3	1022.27	24.2	1345.83	24.2	844.697	24.2	441.616
24.3	1666.38	24.2	434.739	24.3	1129.96	24.3	1037.17	24.3	1069.9	24.4	1032.5	24.3	1359.13	24.3	849.76	24.3	450.41
24.4	1678.61	24.3	436.305	24.4	1142.1	24.4	1041.95	24.4	1082.34	24.5	1042.66	24.4	1372.1	24.4	854.463	24.4	459.157
24.5	1690.54	24.4	437.877	24.5	1154.28	24.5	1046.71	24.5	1094.58	24.6	1052.67	24.5	1384.63	24.5	859.216	24.5	468.025
24.6	1702.38	24.5	439.477	24.6	1166.4	24.6	1051.07	24.6	1106.73	24.7	1062.65	24.6	1397.38	24.6	863.945	24.6	476.872
24.7	1713.77	24.6	441.009	24.7	1178.43	24.7	1055.46	24.7	1118.85	24.8	1072.37	24.7	1409.95	24.7	868.456	24.7	485.74
24.8	1725.2	24.7	442.56	24.8	1190.5	24.8	1059.8	24.8	1130.93	24.9	1081.98	24.8	1422.02	24.8	872.755	24.8	494.544
24.9	1736.32	24.8	444.103	24.9	1202.34	24.9	1064	24.9	1142.95	25	1091.03	24.9	1434.27	24.9	877.139	24.9	503.359
25	1747.07	24.9	445.603	25	1213.94	25	1068.11	25	1154.75	25.1	1100.46	25	1446.08	25	880.87	25	512.17
25.1	1758	25	446.997	25.1	1225.53	25.1	1072.09	25.1	1166.55	25.2	1109.74	25.1	1457.82	25.1	885.256	25.1	520.88
25.2	1768.66	25.1	448.33	25.2	1237.08	25.2	1076.04	25.2	1178.37	25.3	1118.57	25.2	1469.32	25.2	889.042	25.2	529.663
25.3	1779.06	25.2	449.697	25.3	1248.6	25.3	1079.89	25.3	1190.06	25.4	1127.64	25.3	1480.97	25.3	893.03	25.3	538.334
25.4	1789.37	25.3	451.018	25.4	1259.93	25.4	1083.43	25.4	1201.59	25.5	1136.23	25.4	1492.03	25.4	896.725	25.4	546.918
25.5	1799.31	25.4	452.287	25.5	1271.28	25.5	1086.94	25.5	1213.29	25.6	1144.72	25.5	1503.29	25.5	900.366	25.5	555.605
25.6	1809.15	25.5	453.595	25.6	1282.47	25.6	1090.45	25.6	1224.42	25.7	1153.1	25.6	1514.22	25.6	903.948	25.6	564.271
25.7	1818.85	25.6	454.87	25.7	1293.73	25.7	1093.95	25.7	1235.75	25.8	1161.21	25.7	1524.9	25.7	907.519	25.7	573.025
25.8	1828.3	25.7	456.127	25.8	1304.41	25.8	1097.25	25.8	1247.06	25.9	1169.08	25.8	1535.72	25.8	910.781	25.8	581.762
25.9	1837.63	25.8	457.373	25.9	1315.33	25.9	1100.44	25.9	1258.12	26	1177.19	25.9	1546.3	25.9	914.07	25.9	590.075
26	1846.96	25.9	458.556	26	1326.2	26	1103.62	26	1269.18	26.1	1184.85	26	1556.6	26	917.327	26	598.693
26.1	1855.8	26	459.58	26.1	1336.98	26.1	1107.03	26.1	1279.94	26.2	1192.44	26.1	1566.65	26.1	920.62	26.1	607.091
26.2	1864.68	26.1	460.666	26.2	1347.49	26.2	1109.79	26.2	1290.64	26.3	1199.96	26.2	1576.74	26.2	923.628	26.2	615.528
26.3	1873.18	26.2	461.733	26.3	1357.94	26.3	1112.76	26.3	1301.74	26.4	1207.48	26.3	1586.58	26.3	926.644	26.3	624.006
26.4	1881.8	26.3	462.767	26.4	1368.28	26.4	1115.56	26.4	1312.25	26.5	1214.35	26.4	1595.95	26.4	929.503	26.4	632.347
26.5	1890.02	26.4	463.806	26.5	1378.54	26.5	1118.43	26.5	1322.72	26.6	1221.49	26.5	1605.6	26.5	932.34	26.5	640.794
26.6	1898.07	26.5	464.862	26.6	1388.64	26.6	1121.07	26.6	1333.14	26.7	1228.37	26.6	1614.86	26.6	935.121	26.6	649.125
26.7	1906.06	26.6	465.891	26.7	1398.61	26.7	1124.09	26.7	1343.51	26.8	1235.13	26.7	1624.08	26.7	937.933	26.7	657.378
26.8	1914.04	26.7	466.901	26.8	1408.84	26.8	1126.62	26.8	1354.06	26.9	1241.65	26.8	1632.94	26.8	940.637	26.8	665.745
26.9	1921.76	26.8	467.838	26.9	1418.37	26.9	1129.09	26.9	1364.03	27	1248.15	26.9	1641.75	26.9	943.297	26.9	674.097
27	1929.31	26.9	468.677	27	1427.94	27	1131.61	27	1374.24	27.1	1254.77	27	1650.55	27	945.909	27	682.124
27.1	1936.63	27	469.522	27.1	1437.53	27.1	1134.17	27.1	1384.09	27.2	1261.06	27.1	1659.09	27.1	948.375	27.1	690.21
27.2	1944.01	27.1	470.365	27.2	1447.09	27.2	1136.65	27.2	1393.91	27.3	1267.15	27.2	1667.57	27.2	950.754	27.2	698.234
27.3	1951.14	27.2	471.198	27.3	1456.51	27.3	1138.95	27.3	1403.7	27.4	1273.38	27.3	1675.89	27.3	953.11	27.3	706.324
27.4	1958.12	27.3	472.022	27.4	1465.81	27.4	1141.28	27.4	1413.43	27.5	1278.95	27.4	1683.86	27.4	955.434	27.4	714.125
27.5	1964.65	27.4	472.853	27.5	1475.04	27.5	1143.47	27.5	1422.98	27.6	1284.83	27.5	1691.86	27.5	957.812	27.5	722.126
27.6	1971.31	27.5	473.705	27.6	1484.17	27.6	1145.61	27.6	1432.5	27.7	1290.59	27.6	1699.66	27.6	960.13	27.6	729.864
27.7	1977.99	27.6	474.51	27.7	1493.34	27.7	1147.72	27.7	1441.8	27.8	1296.34	27.7	1707.26	27.7	962.184	27.7	737.667
27.8	1984.6	27.7	475.346	27.8	1502.11	27.8	1149.81	27.8	1451.03	27.9	1301.54	27.8	1714.88	27.8	964.273	27.8	745.29
27.9	1990.77	27.8	476.147	27.9	1510.75	27.9	1151.81	27.9	1460.22	28	1306.91	27.9	1722.3	27.9	966.266	27.9	752.907
28	1997	27.9	476.964	28	1519.34	28	1153.82	28	1469.53	28.1	1312.09	28	1729.54	28	968.305	28	760.466
28.1	2002.91	28	477.686	28.1	1528.18	28.1	1155.8	28.1	1478.32	28.2	1317.05	28.1	1736.62	28.1	970.324	28.1	768.045
28.2	2008.92	28.1	478.404	28.2	1536.33	28.2	1157.72	28.2	1487.16	28.3	1321.95	28.2	1743.52	28.2	972.235	28.2	775.494
28.3	2014.57	28.2	479.12	28.3	1544.67	28.3	1159.62	28.3	1496.03	28.4	1327.17	28.3	1750.41	28.3	974.198	28.3	782.884
28.4	2020.19	28.3	479.822	28.4	1552.79	28.4	1161.53	28.4	1504.71	28.5	1332	28.4	1757.32	28.4	976.07	28.4	790.24
28.5	2026.06	28.4	480.541	28.5	1560.88	28.5	1163.39	28.5	1513.19	28.6	1336.48	28.5	1763.77	28.5	977.822	28.5	797.591
28.6	2031.39	28.5	481.246	28.6	1568.86	28.6	1165.18	28.6	1521.55	28.7	1341.06	28.6	1770.17	28.6	979.598	28.6	804.988
28.7	2036.79	28.6	481.978	28.7	1576.81	28.7	1166.97	28.7	1529.94	28.8	1345.59	28.7	1776.64	28.7	981.376	28.7	812.088
28.8	2042.17	28.7	482.718	28.8	1584.57	28.8	1168.71	28.8	1538.34	28.9	1349.83	28.8	1782.94	28.8	983.07	28.8	819.134
28.9	2047.41	28.8	483.436	28.9	1592.33	28.9	1170.42	28.9	1546.46	29	1354.11	28.9	1788.87	28.9	984.759	28.9	826.091
29	2052.51	28.9	484.135	29	1600	29	1171.97	29	1554.54	29.1	1358.42	29	1794.94	29	986.449	29	832.987
29.1	2057.4	29	484.763	29.1	1607.52	29.1	1173.51	29.1	1562.38	29.2	1362.33	29.1	1800.86	29.1	988.039	29.1	839.783
29.2	2062.23	29.1	485.316	29.2	1614.7	29.2	1175.02	29.2	1570.27	29.3	1366.26	29.2	1806.62	29.2	989.602	29.2	846.494
29.3	2066.99	29.2	485.888	29.3	1622.07	29.3	1176.51	29.3	1577.88	29.4	1370.2	29.3	1812.42	29.3	991.199	29.3	853.081
29.4	2071.7	29.3	486.53	29.4	1629.24	29.4	1177.99	29.4	1585.52	29.5	1374.16	29.4	1818.03	29.4	992.716	29.4	859.78
29.5	2076.35	29.4	487.112	29.5	1636.3	29.5	1179.49	29.5	1593.11	29.6	1378.1	29.5	1823.28	29.5	994.262	29.5	866.503
29.6	2080.86	29.5	487.705	29.6	1643.31	29.6	1181.01	29.6	1600.72	29.7	1381.67	29.6	1828.53	29.6	995.855	29.6	873.162
29.7	2085.29	29.6	488.332	29.7	1650.11	29.7	1182.52	29.7	1608.26	29.8	1385.23	29.7	1833.73	29.7	997.326	29.7	879.639
29.8	2089.51	29.7	488.916	29.8	1656.88	29.8	1184.02	29.8	1615.41	29.9	1388.76	29.8	1838.92	29.8	998.746	29.8	886.07
29.9	2093.67	29.8	489.506	29.9	1663.66	29.9	1185.52	29.9	1622.55	30	1392.26	29.9	1844.07	29.9	1000.06	29.9	892.428
30	2097.8	29.9	490.143	30	1670.24	30	1186.9	30	1630.05	30.1	1395.54	30	1849.06	30	1001.38	30	898.679
30.1	2101.94	30	490.698	30.1	1676.71	30.1	1188.21	30.1	1636.8	30.2	1398.8	30.1	1853.8	30.1	1002.69	30.1	904.987
30.2	2105.87	30.1	491.22	30.2	1683.13	30.2	1189.57	30.2	1643.75	30.3	1402.06	30.2	1858.46	30.2	1003.96	30.2	911.066
30.3	2109.79	30.2	491.737	30.3	1689.38	30.3	1190.85	30.3	1650.41	30.4	1405.32	30.3	1863.09	30.3	1005.22	30.3	917.206
30.4	2113.55	30.3	492.26	30.4	1695.66	30.4	1192.13	30.4	1657.16	30.5	1408.62	30.4	1867.61	30.4	1006.54	30.4	923.066
30.5	2117.36	30.4	492.803	30.5	1701.82	30.5	1193.46	30.5	1663.7	30.6	1411.39	30.5	1872.02	30.5	1007.84	30.5	928.905
30.6	2121.18	30.5	493.352	30.6	1707.72	30.6	1194.72	30.6	1670.29	30.7	1414.36	30.6	1876.54	30.6	1009.13	30.6	934.762
30.7	2124.91	30.6	493.901	30.7	1713.6	30.7	1195.99	30.7	1676.71	30.8	1417.27	30.7	1881.01	30.7	1010.38	30.7	940.643
30.8	2128.47	30.7	494.448	30.8	1719.43	30.8	1197.17	30.8	1682.77	30.9	1420.16	30.8	1885.06	30.8	1011.66	30.8	946.469
30.9	2132.03	30.8	494.959	30.9	1725.14	30.9	1198.38	30.9	1689.08	31	1422.92	30.9	1889.12	30.9	1012.91	30.9	952.172
31	2135.53	30.9	495.492	31	1730.79	31	1199.59	31	1695.23	31.1	1425.7	31	1893.14	31	1014.02	31	957.878
31.1	2139.01	31	496.021	31.1	1736.41	31.1	1200.76	31.1	1701.27	31.2	1428.42	31.1	1897.18	31.1	1015.17	31.1	963.23
31.2	2142.22	31.1	496.592	31.2	1741.91	31.2	1201.9	31.2	1707.23	31.3	1431.12	31.2	1901.14	31.2	1016.28	31.2	968.628
31.3	2145.5	31.2	496.968	31.3	1747.36	31.3	1203.03	31.3	1713.12	31.4	1433.58	31.3	1904.94	31.3	1017.4	31.3	973.95
31.4	2148.77	31.3	497.385	31.4	1752.61	31.4	1204.13	31.4	1718.93	31.5	1436.06	31.4	1908.68	31.4	1018.54	31.4	979.269
31.5	2152.03	31.4	497.862	31.5	1757.85	31.5	1205.23	31.5	1724.73	31.6	1438.55	31.5	1912.38	31.5	1019.64	31.5	984.516
31.6	2155.08	31.5	498.316	31.6	1762.92	31.6	1206.29	31.6	1730.32	31.7	1440.96	31.6	1916.04	31.6	1020.72	31.6	989.68
31.7	2157.97	31.6	498.769	31.7	1767.93	31.7	1207.34	31.7	1735.88	31.8	1443.38	31.7	1919.63	31.7	1021.82	31.7	994.824
31.8	2160.85	31.7	499.228	31.8	1772.96	31.8	1208.42	31.8	1741.34	31.9	1445.68	31.8	1923.1	31.8	1022.8	31.8	999.977
31.9	2163.69	31.8	499.702	31.9	1777.91	31.9	1209.48	31.9	1746.74	32	1447.98	31.9	1926.65	31.9	1023.8	31.9	1005.12
32	2166.59	31.9	500.214	32	1782.82	32	1210.57	32	1752.27	32.1	1450.2	32	1930.29	32	1024.79	32	1009.93
32.1	2169.38	32	500.69	32.1	1787.57	32.1	1211.58	32.1	1757.4	32.2	1452.44	32.1	1933.47	32.1	1025.75	32.1	1014.73
32.2	2172.13	32.1	501.16	32.2	1792.32	32.2	1212.61	32.2	1762.4	32.3	1454.57	32.2	1936.7	32.2	1026.7	32.2	1019.46
32.3	2174.84	32.2	501.651	32.3	1796.8	32.3	1213.56	32.3	1767.43	32.4	1456.72	32.3	1939.9	32.3	1027.71	32.3	1024.22
32.4	2177.57	32.3	502.116	32.4	1801.3	32.4	1214.55	32.4	1772.46	32.5	1458.82	32.4	1943.09	32.4	1028.65	32.4	1028.85
32.5	2180.25	32.4	502.592	32.5	1805.79	32.5	1215.55	32.5	1777.4	32.6	1460.77	32.5	1946.21	32.5	1029.56	32.5	1033.45
32.6	2182.87	32.5	503.046	32.6	1810.2	32.6	1216.55	32.6	1782.28	32.7	1462.7	32.6	1949.24	32.6	1030.48	32.6	1037.99
32.7	2185.55	32.6	503.483	32.7	1814.48	32.7	1217.54	32.7	1787.06	32.8	1464.59	32.7	1952.15	32.7	1031.39	32.7	1042.44
32.8	2188.08	32.7	503.886	32.8	1818.8	32.8	1218.49	32.8	1791.61	32.9	1466.51	32.8	1955.08	32.8	1032.3	32.8	1046.87
32.9	2190.45	32.8	504.296	32.9	1822.95	32.9	1219.52	32.9	1796.2	33	1468.42	32.9	1957.97	32.9	1033.19	32.9	1051.33
33	2192.89	32.9	504.702	33	1827.03	33	1220.44	33	1800.81	33.1	1470.2	33	1960.85	33	1034.09	33	1055.56
33.1	2195.31	33	505.121	33.1	1831.1	33.1	1221.23	33.1	1805.23	33.2	1471.97	33.1	1963.62	33.1	1034.92	33.1	1059.79
33.2	2197.67	33.1	505.529	33.2	1835.15	33.2	1222.08	33.2	1809.67	33.3	1473.74	33.2	1966.23	33.2	1035.78	33.2	1063.96
33.3	2199.89	33.2	505.91	33.3	1839.18	33.3	1222.97	33.3	1814.11	33.4	1475.51	33.3	1968.88	33.3	1036.65	33.3	1068.17
33.4	2202.14	33.3	506.284	33.4	1843.19	33.4	1223.88	33.4	1818.63	33.5	1477.27	33.4	1971.53	33.4	1037.52	33.4	1072.26
33.5	2204.34	33.4	506.667	33.5	1846.83	33.5	1224.78	33.5	1822.72	33.6	1479.06	33.5	1974.16	33.5	1038.32	33.5	1076.31
33.6	2206.5	33.5	507.069	33.6	1850.54	33.6	1225.67	33.6	1826.87	33.7	1480.85	33.6	1976.67	33.6	1039.13	33.6	1080.32
33.7	2208.69	33.6	507.469	33.7	1854.17	33.7	1226.56	33.7	1831.19	33.8	1482.36	33.7	1979.16	33.7	1039.92	33.7	1084.28
33.8	2210.87	33.7	507.87	33.8	1857.74	33.8	1227.43	33.8	1835.26	33.9	1483.91	33.8	1981.62	33.8	1040.72	33.8	1088.1
33.9	2213.01	33.8	508.245	33.9	1861.3	33.9	1228.21	33.9	1839.09	34	1485.35	33.9	1984.03	33.9	1041.51	33.9	1091.89
34	2215.03	33.9	508.616	34	1864.79	34	1229.01	34	1842.88	34.1	1486.88	34	1986.35	34	1042.31	34	1095.57
34.1	2217	34	508.983	34.1	1868.28	34.1	1229.83	34.1	1846.69	34.2	1488.28	34.1	1988.64	34.1	1043.06	34.1	1099.15
34.2	2218.93	34.1	509.339	34.2	1871.76	34.2	1230.6	34.2	1850.49	34.3	1489.85	34.2	1990.89	34.2	1043.8	34.2	1102.76
34.3	2220.85	34.2	509.678	34.3	1875.2	34.3	1231.39	34.3	1854.34	34.4	1491.31	34.3	1993.17	34.3	1044.56	34.3	1106.31
34.4	2222.77	34.3	510.049	34.4	1878.33	34.4	1232.17	34.4	1858.19	34.5	1492.78	34.4	1995.44	34.4	1045.29	34.4	1109.88
34.5	2224.71	34.4	510.394	34.5	1881.53	34.5	1232.93	34.5	1861.77	34.6	1494.29	34.5	1997.67	34.5	1046.05	34.5	1113.4
34.6	2226.62	34.5	510.757	34.6	1884.73	34.6	1233.69	34.6	1865.25	34.7	1495.64	34.6	1999.94	34.6	1046.77	34.6	1116.89
34.7	2228.45	34.6	511.089	34.7	1887.88	34.7	1234.45	34.7	1868.82	34.8	1496.92	34.7	2001.92	34.7	1047.5	34.7	1120.27
34.8	2230.35	34.7	511.437	34.8	1890.93	34.8	1235.19	34.8	1872.28	34.9	1498.24	34.8	2003.94	34.8	1048.23	34.8	1123.51
34.9	2232.16	34.8	511.791	34.9	1894.04	34.9	1235.96	34.9	1875.7	35	1499.53	34.9	2005.96	34.9	1048.95	34.9	1126.75
35	2233.94	34.9	512.151	35	1897.06	35	1236.73	35	1879.16	35.1	1500.79	35	2007.99	35	1049.65	35	1129.97
35.1	2235.71	35	512.495	35.1	1900	35.1	1237.5	35.1	1882.55	35.2	1502.12	35.1	2010.06	35.1	1050.35	35.1	1133.19
35.2	2237.48	35.1	512.843	35.2	1902.84	35.2	1238.24	35.2	1885.96	35.3	1503.39	35.2	2011.98	35.2	1051.02	35.2	1136.35
35.3	2239.26	35.2	513.182	35.3	1905.71	35.3	1238.92	35.3	1889.34	35.4	1504.59	35.3	2013.89	35.3	1051.72	35.3	1139.35
35.4	2240.93	35.3	513.542	35.4	1908.56	35.4	1239.62	35.4	1892.4	35.5	1505.78	35.4	2015.85	35.4	1052.38	35.4	1142.33
35.5	2242.57	35.4	513.898	35.5	1911.41	35.5	1240.35	35.5	1895.43	35.6	1506.99	35.5	2017.77	35.5	1053.05	35.5	1145.34
35.6	2244.24	35.5	514.273	35.6	1914.21	35.6	1241.06	35.6	1898.49	35.7	1508.15	35.6	2019.65	35.6	1053.72	35.6	1148.3
35.7	2245.9	35.6	514.652	35.7	1916.85	35.7	1241.77	35.7	1901.55	35.8	1509.27	35.7	2021.46	35.7	1054.4	35.7	1151.22
35.8	2247.5	35.7	514.998	35.8	1919.41	35.8	1242.49	35.8	1904.61	35.9	1510.41	35.8	2023.26	35.8	1055.04	35.8	1154.13
35.9	2249.06	35.8	515.323	35.9	1921.95	35.9	1243.19	35.9	1907.62	36	1511.56	35.9	2025.06	35.9	1055.69	35.9	1156.98
36	2250.57	35.9	515.655	36	1924.49	36	1243.88	36	1910.61	36.1	1512.65	36	2026.88	36	1056.35	36	1159.78
36.1	2252.13	36	515.969	36.1	1927.03	36.1	1244.54	36.1	1913.47	36.2	1513.78	36.1	2028.68	36.1	1057	36.1	1162.59
36.2	2253.64	36.1	516.299	36.2	1929.55	36.2	1245.23	36.2	1916.29	36.3	1514.85	36.2	2030.37	36.2	1057.6	36.2	1165.36
36.3	2255.15	36.2	516.632	36.3	1932.08	36.3	1245.93	36.3	1919.1	36.4	1515.94	36.3	2032.07	36.3	1058.25	36.3	1168.06
36.4	2256.6	36.3	516.957	36.4	1934.47	36.4	1246.63	36.4	1921.81	36.5	1516.93	36.4	2033.7	36.4	1058.89	36.4	1170.79
36.5	2258.07	36.4	517.302	36.5	1936.9	36.5	1247.27	36.5	1924.53	36.6	1517.95	36.5	2035.3	36.5	1059.52	36.5	1173.43
36.6	2259.53	36.5	517.609	36.6	1939.23	36.6	1247.9	36.6	1927.16	36.7	1518.98	36.6	2036.88	36.6	1060.14	36.6	1175.88
36.7	2260.93	36.6	517.905	36.7	1941.52	36.7	1248.5	36.7	1929.76	36.8	1519.98	36.7	2038.5	36.7	1060.76	36.7	1178.33
36.8	2262.29	36.7	518.214	36.8	1943.81	36.8	1249.15	36.8	1932.32	36.9	1521	36.8	2040.06	36.8	1061.34	36.8	1180.78
36.9	2263.64	36.8	518.546	36.9	1946.13	36.9	1249.78	36.9	1934.92	37	1522	36.9	2041.64	36.9	1061.98	36.9	1183.26
37	2264.98	36.9	518.855	37	1948.35	37	1250.4	37	1937.49	37.1	1523.04	37	2043.19	37	1062.58	37	1185.7
37.1	2266.31	37	519.186	37.1	1950.53	37.1	1251.04	37.1	1940.06	37.2	1524.04	37.1	2044.75	37.1	1063.13	37.1	1188.16
37.2	2267.64	37.1	519.516	37.2	1952.75	37.2	1251.67	37.2	1942.57	37.3	1524.98	37.2	2046.31	37.2	1063.71	37.2	1190.51
37.3	2268.99	37.2	519.819	37.3	1954.86	37.3	1252.3	37.3	1944.97	37.4	1525.96	37.3	2047.81	37.3	1064.3	37.3	1192.82
37.4	2270.31	37.3	520.117	37.4	1956.97	37.4	1252.9	37.4	1947.32	37.5	1526.85	37.4	2049.27	37.4	1064.88	37.4	1195.14
37.5	2271.63	37.4	520.416	37.5	1959.04	37.5	1253.52	37.5	1949.66	37.6	1527.77	37.5	2050.72	37.5	1065.45	37.5	1197.34
37.6	2272.94	37.5	520.719	37.6	1961.14	37.6	1254.15	37.6	1952	37.7	1528.73	37.6	2052.16	37.6	1066.03	37.6	1199.53
37.7	2274.22	37.6	521.034	37.7	1963.16	37.7	1254.76	37.7	1954.36	37.8	1529.64	37.7	2053.57	37.7	1066.6	37.7	1201.69
37.8	2275.43	37.7	521.346	37.8	1965.15	37.8	1255.38	37.8	1956.67	37.9	1530.56	37.8	2054.95	37.8	1067.17	37.8	1203.87
37.9	2276.66	37.8	521.663	37.9	1967.16	37.9	1255.97	37.9	1958.93	38	1531.49	37.9	2056.33	37.9	1067.73	37.9	1206.03
38	2277.85	37.9	521.965	38	1969.15	38	1256.56	38	1961.05	38.1	1532.36	38	2057.73	38	1068.28	38	1208.19
38.1	2279.02	38	522.284	38.1	1971.05	38.1	1257.16	38.1	1963.11	38.2	1533.16	38.1	2059.08	38.1	1068.86	38.1	1210.31
38.2	2280.23	38.1	522.569	38.2	1972.92	38.2	1257.76	38.2	1965.28	38.3	1533.97	38.2	2060.38	38.2	1069.44	38.2	1212.33
38.3	2281.39	38.2	522.859	38.3	1974.69	38.3	1258.35	38.3	1967.44	38.4	1534.82	38.3	2061.67	38.3	1069.97	38.3	1214.31
38.4	2282.54	38.3	523.178	38.4	1976.49	38.4	1258.92	38.4	1969.53	38.5	1535.63	38.4	2062.96	38.4	1070.54	38.4	1216.24
38.5	2283.7	38.4	523.491	38.5	1978.36	38.5	1259.47	38.5	1971.63	38.6	1536.44	38.5	2064.23	38.5	1071.1	38.5	1218.18
38.6	2284.86	38.5	523.792	38.6	1980.15	38.6	1260.06	38.6	1973.74	38.7	1537.26	38.6	2065.51	38.6	1071.64	38.6	1220.12
38.7	2286.04	38.6	524.07	38.7	1981.92	38.7	1260.6	38.7	1975.8	38.8	1538.1	38.7	2066.79	38.7	1072.11	38.7	1222.04
38.8	2287.17	38.7	524.355	38.8	1983.66	38.8	1261.15	38.8	1977.79	38.9	1538.92	38.8	2068.07	38.8	1072.62	38.8	1223.99
38.9	2288.33	38.8	524.639	38.9	1985.4	38.9	1261.72	38.9	1979.67	39	1539.71	38.9	2069.37	38.9	1073.12	38.9	1225.78
39	2289.45	38.9	524.898	39	1987.12	39	1262.26	39	1981.62	39.1	1540.51	39	2070.64	39	1073.63	39	1227.58
39.1	2290.52	39	525.175	39.1	1988.79	39.1	1262.79	39.1	1983.54	39.2	1541.27	39.1	2071.89	39.1	1074.14	39.1	1229.38
39.2	2291.6	39.1	525.445	39.2	1990.46	39.2	1263.33	39.2	1985.42	39.3	1542.05	39.2	2073.07	39.2	1074.63	39.2	1231.1
39.3	2292.71	39.2	525.729	39.3	1992.16	39.3	1263.83	39.3	1987.28	39.4	1542.85	39.3	2074.25	39.3	1075.14	39.3	1232.83
39.4	2293.81	39.3	526.012	39.4	1993.85	39.4	1264.35	39.4	1989.14	39.5	1543.58	39.4	2075.4	39.4	1075.63	39.4	1234.54
39.5	2294.84	39.4	526.287	39.5	1995.52	39.5	1264.88	39.5	1990.98	39.6	1544.34	39.5	2076.56	39.5	1076.13	39.5	1236.26
39.6	2295.86	39.5	526.538	39.6	1997.09	39.6	1265.4	39.6	1992.76	39.7	1545.08	39.6	2077.69	39.6	1076.6	39.6	1237.94
39.7	2296.89	39.6	526.805	39.7	1998.62	39.7	1265.94	39.7	1994.53	39.8	1545.75	39.7	2078.82	39.7	1077.07	39.7	1239.61
39.8	2297.9	39.7	527.086	39.8	2000.1	39.8	1266.47	39.8	1996.33	39.9	1546.43	39.8	2079.91	39.8	1077.58	39.8	1241.3
39.9	2298.92	39.8	527.358	39.9	2001.54	39.9	1267	39.9	1998.08	40	1547.14	39.9	2080.98	39.9	1078.07	39.9	1242.98
40	2299.92	39.9	527.613	40	2003	40	1267.49	40	1999.79	40.1	1547.81	40	2082.11	40	1078.53	40	1244.56
40.1	2300.91	40	527.933	40.1	2004.45	40.1	1268	40.1	2001.53	40.2	1548.51	40.1	2083.21	40.1	1079.01	40.1	1246.11
40.2	2301.89	40.1	528.202	40.2	2005.9	40.2	1268.51	40.2	2003.24	40.3	1549.12	40.2	2084.31	40.2	1079.49	40.2	1247.65
40.3	2302.85	40.2	528.472	40.3	2007.37	40.3	1269.02	40.3	2004.92	40.4	1549.81	40.3	2085.38	40.3	1079.99	40.3	1249.17
40.4	2303.83	40.3	528.727	40.4	2008.82	40.4	1269.55	40.4	2006.17	40.5	1550.59	40.4	2086.47	40.4	1080.41	40.4	1250.73
40.5	2304.82	40.4	528.964	40.5	2010.24	40.5	1270.06	40.5	2008.19	40.6	1551.51	40.5	2087.55	40.5	1080.89	40.5	1252.24
40.6	2305.75	40.5	529.217	40.6	2011.62	40.6	1270.56	40.6	2009.45	40.7	1552.15	40.6	2088.58	40.6	1081.37	40.6	1253.66
40.7	2306.69	40.6	529.472	40.7	2013.03	40.7	1271.08	40.7	2011.08	40.8	1552.7	40.7	2089.61	40.7	1081.82	40.7	1255.07
40.8	2307.63	40.7	529.73	40.8	2014.43	40.8	1271.55	40.8	2012.67	40.9	1553.24	40.8	2090.64	40.8	1082.34	40.8	1256.5
40.9	2308.56	40.8	529.938	40.9	2015.8	40.9	1272.05	40.9	2014.24	41	1553.8	40.9	2091.68	40.9	1082.73	40.9	1257.87
41	2309.5	40.9	530.159	41	2017.19	41	1272.56	41	2015.87	41.1	1554.44	41	2092.69	41	1083.13	41	1259.33
41.1	2310.43	41	530.292	41.1	2018.58	41.1	1273.09	41.1	2017.4	41.2	1555.1	41.1	2093.69	41.1	1083.56	41.1	1260.78
41.2	2311.32	41.1	530.605	41.2	2020.03	41.2	1273.59	41.2	2018.84	41.3	1555.75	41.2	2094.67	41.2	1084.01	41.2	1262.09
41.3	2312.24	41.2	530.921	41.3	2021.29	41.3	1274.09	41.3	2020.33	41.4	1556.36	41.3	2095.64	41.3	1084.4	41.3	1263.36
41.4	2313.14	41.3	531.305	41.4	2022.57	41.4	1274.58	41.4	2021.78	41.5	1557.01	41.4	2096.63	41.4	1084.87	41.4	1264.66
41.5	2314.01	41.4	531.518	41.5	2023.8	41.5	1275.08	41.5	2023.26	41.6	1557.61	41.5	2097.63	41.5	1085.35	41.5	1265.92
41.6	2314.9	41.5	531.648	41.6	2025.05	41.6	1275.55	41.6	2024.72	41.7	1558.24	41.6	2098.56	41.6	1085.78	41.6	1267.19
41.7	2315.78	41.6	531.843	41.7	2026.29	41.7	1276.04	41.7	2026.17	41.8	1558.86	41.7	2099.49	41.7	1086.21	41.7	1268.44
41.8	2316.66	41.7	532.135	41.8	2027.53	41.8	1276.53	41.8	2027.58	41.9	1559.46	41.8	2100.45	41.8	1086.67	41.8	1269.64
41.9	2317.54	41.8	532.382	41.9	2028.78	41.9	1277.06	41.9	2028.94	42	1560.07	41.9	2101.38	41.9	1087.1	41.9	1270.87
42	2318.37	41.9	532.633	42	2030	42	1277.53	42	2030.27	42.1	1560.65	42	2102.29	42	1087.57	42	1272.08
42.1	2319.22	42	532.909	42.1	2031.23	42.1	1278.01	42.1	2031.65	42.2	1561.24	42.1	2103.2	42.1	1088.01	42.1	1273.31
42.2	2320.08	42.1	533.198	42.2	2032.44	42.2	1278.49	42.2	2032.98	42.3	1561.85	42.2	2104.12	42.2	1088.42	42.2	1274.55
42.3	2320.93	42.2	533.47	42.3	2033.62	42.3	1278.95	42.3	2034.31	42.4	1562.46	42.3	2105.06	42.3	1088.82	42.3	1275.75
42.4	2321.77	42.3	533.734	42.4	2034.75	42.4	1279.41	42.4	2035.65	42.5	1563.07	42.4	2105.96	42.4	1089.25	42.4	1276.99
42.5	2322.61	42.4	533.967	42.5	2035.9	42.5	1279.86	42.5	2036.95	42.6	1563.65	42.5	2106.87	42.5	1089.7	42.5	1278.17
42.6	2323.44	42.5	534.215	42.6	2037.03	42.6	1280.28	42.6	2038.27	42.7	1564.2	42.6	2107.8	42.6	1090.15	42.6	1279.36
42.7	2324.28	42.6	534.472	42.7	2038.16	42.7	1280.71	42.7	2039.61	42.8	1564.78	42.7	2108.69	42.7	1090.58	42.7	1280.48
42.8	2325.1	42.7	534.73	42.8	2039.26	42.8	1281.16	42.8	2040.89	42.9	1565.35	42.8	2109.57	42.8	1090.99	42.8	1281.47
42.9	2325.93	42.8	534.98	42.9	2040.33	42.9	1281.59	42.9	2042.15	43	1565.91	42.9	2110.47	42.9	1091.38	42.9	1282.57
43	2326.77	42.9	535.218	43	2041.43	43	1282.02	43	2043.37	43.1	1566.47	43	2111.39	43	1091.77	43	1283.74
43.1	2327.52	43	535.481	43.1	2042.56	43.1	1282.45	43.1	2044.61	43.2	1567.03	43.1	2112.27	43.1	1092.14	43.1	1284.81
43.2	2328.28	43.1	535.73	43.2	2043.64	43.2	1282.86	43.2	2045.82	43.3	1567.6	43.2	2113.1	43.2	1092.55	43.2	1285.81
43.3	2329.06	43.2	535.955	43.3	2044.73	43.3	1283.31	43.3	2047.03	43.4	1568.16	43.3	2113.92	43.3	1092.93	43.3	1286.85
43.4	2329.83	43.3	536.191	43.4	2045.78	43.4	1283.77	43.4	2048.2	43.5	1568.73	43.4	2114.75	43.4	1093.34	43.4	1287.88
43.5	2330.59	43.4	536.445	43.5	2046.87	43.5	1284.23	43.5	2049.37	43.6	1569.26	43.5	2115.59	43.5	1093.71	43.5	1288.89
43.6	2331.32	43.5	536.698	43.6	2047.93	43.6	1284.68	43.6	2050.55	43.7	1569.81	43.6	2116.4	43.6	1094.09	43.6	1289.9
43.7	2332.06	43.6	536.941	43.7	2048.99	43.7	1285.12	43.7	2051.69	43.8	1570.29	43.7	2117.21	43.7	1094.47	43.7	1290.92
43.8	2332.81	43.7	537.176	43.8	2050.04	43.8	1285.55	43.8	2052.85	43.9	1570.82	43.8	2118.04	43.8	1094.84	43.8	1291.95
43.9	2333.57	43.8	537.424	43.9	2051.07	43.9	1285.98	43.9	2054	44	1571.34	43.9	2118.8	43.9	1095.21	43.9	1292.96
44	2334.3	43.9	537.672	44	2052.11	44	1286.41	44	2055.15	44.1	1571.84	44	2119.59	44	1095.59	44	1293.96
44.1	2335.03	44	537.926	44.1	2053.1	44.1	1286.85	44.1	2056.28	44.2	1572.37	44.1	2120.39	44.1	1095.96	44.1	1294.92
44.2	2335.77	44.1	538.155	44.2	2054.09	44.2	1287.3	44.2	2057.45	44.3	1572.88	44.2	2121.17	44.2	1096.34	44.2	1295.91
44.3	2336.48	44.2	538.426	44.3	2055.12	44.3	1287.71	44.3	2058.56	44.4	1573.41	44.3	2121.94	44.3	1096.72	44.3	1296.89
44.4	2337.2	44.3	538.627	44.4	2056.13	44.4	1288.14	44.4	2059.74	44.5	1573.93	44.4	2122.71	44.4	1097.11	44.4	1297.83
44.5	2337.9	44.4	538.855	44.5	2057.15	44.5	1288.53	44.5	2060.9	44.6	1574.45	44.5	2123.49	44.5	1097.51	44.5	1298.79
44.6	2338.62	44.5	539.074	44.6	2058.08	44.6	1288.94	44.6	2061.81	44.7	1574.97	44.6	2124.25	44.6	1097.91	44.6	1299.73
44.7	2339.36	44.6	539.32	44.7	2059	44.7	1289.36	44.7	2062.81	44.8	1575.52	44.7	2125.01	44.7	1098.27	44.7	1300.52
44.8	2340.09	44.7	539.542	44.8	2059.94	44.8	1289.77	44.8	2063.88	44.9	1576.01	44.8	2125.74	44.8	1098.62	44.8	1301.38
44.9	2340.79	44.8	539.766	44.9	2060.86	44.9	1290.19	44.9	2064.92	45	1576.53	44.9	2126.48	44.9	1098.98	44.9	1302.24
45	2341.5	44.9	539.984	45	2061.78	45	1290.6	45	2065.99	45.1	1577.06	45	2127.19	45	1099.33	45	1303.12
45.1	2342.24	45	540.209	45.1	2062.71	45.1	1291.03	45.1	2067.03	45.2	1577.6	45.1	2127.92	45.1	1099.68	45.1	1303.98
45.2	2342.95	45.1	540.426	45.2	2063.63	45.2	1291.44	45.2	2068.07	45.3	1578.09	45.2	2128.65	45.2	1100.03	45.2	1304.87
45.3	2343.65	45.2	540.632	45.3	2064.53	45.3	1291.85	45.3	2069.13	45.4	1578.58	45.3	2129.37	45.3	1100.37	45.3	1305.75
45.4	2344.31	45.3	540.859	45.4	2065.44	45.4	1292.25	45.4	2070.17	45.5	1579.06	45.4	2130.09	45.4	1100.7	45.4	1306.62
45.5	2344.97	45.4	541.089	45.5	2066.32	45.5	1292.64	45.5	2071.18	45.6	1579.55	45.5	2130.8	45.5	1101.02	45.5	1307.5
45.6	2345.59	45.5	541.309	45.6	2067.21	45.6	1293.05	45.6	2072.2	45.7	1580.05	45.6	2131.5	45.6	1101.41	45.6	1308.38
45.7	2346.19	45.6	541.557	45.7	2068.09	45.7	1293.47	45.7	2073.15	45.8	1580.49	45.7	2132.21	45.7	1101.77	45.7	1309.32
45.8	2346.85	45.7	541.785	45.8	2068.96	45.8	1293.88	45.8	2074.15	45.9	1580.95	45.8	2132.93	45.8	1102.14	45.8	1310.27
45.9	2347.52	45.8	541.999	45.9	2069.82	45.9	1294.3	45.9	2075.12	46	1581.43	45.9	2133.66	45.9	1102.48	45.9	1311.03
46	2348.19	45.9	542.23	46	2070.64	46	1294.71	46	2076.07	46.1	1581.74	46	2134.39	46	1102.82	46	1311.45
46.1	2348.82	46	542.465	46.1	2071.48	46.1	1295.11	46.1	2077.02	46.2	1582.23	46.1	2135.13	46.1	1103.16	46.1	1312.36
46.2	2349.46	46.1	542.687	46.2	2072.31	46.2	1295.5	46.2	2077.95	46.3	1582.67	46.2	2135.81	46.2	1103.5	46.2	1313.16
46.3	2350.16	46.2	542.917	46.3	2073.16	46.3	1295.9	46.3	2078.9	46.4	1583.1	46.3	2136.53	46.3	1103.87	46.3	1313.88
46.4	2350.81	46.3	543.145	46.4	2073.97	46.4	1296.3	46.4	2079.84	46.5	1583.53	46.4	2137.27	46.4	1104.22	46.4	1314.66
46.5	2351.43	46.4	543.37	46.5	2074.77	46.5	1296.7	46.5	2080.76	46.6	1583.96	46.5	2138.01	46.5	1104.57	46.5	1315.51
46.6	2352.07	46.5	543.586	46.6	2075.58	46.6	1297.1	46.6	2081.7	46.7	1584.39	46.6	2138.65	46.6	1104.91	46.6	1316.34
46.7	2352.7	46.6	543.804	46.7	2076.38	46.7	1297.49	46.7	2082.62	46.8	1584.84	46.7	2139.3	46.7	1105.28	46.7	1317.15
46.8	2353.37	46.7	544.011	46.8	2077.2	46.8	1297.86	46.8	2083.48	46.9	1585.26	46.8	2139.93	46.8	1105.64	46.8	1317.94
46.9	2354.02	46.8	544.218	46.9	2078.01	46.9	1298.25	46.9	2084.39	47	1585.7	46.9	2140.62	46.9	1105.99	46.9	1318.66
47	2354.67	46.9	544.445	47	2078.82	47	1298.64	47	2085.3	47.1	1586.13	47	2141.28	47	1106.33	47	1319.37
47.1	2355.33	47	544.676	47.1	2079.62	47.1	1299.03	47.1	2086.18	47.2	1586.55	47.1	2141.94	47.1	1106.68	47.1	1320.07
47.2	2355.93	47.1	544.877	47.2	2080.39	47.2	1299.44	47.2	2087.05	47.3	1586.98	47.2	2142.6	47.2	1107.03	47.2	1320.78
47.3	2356.57	47.2	545.086	47.3	2081.17	47.3	1299.83	47.3	2087.89	47.4	1587.4	47.3	2143.21	47.3	1107.37	47.3	1321.47
47.4	2357.2	47.3	545.292	47.4	2081.94	47.4	1300.21	47.4	2088.73	47.5	1587.82	47.4	2143.85	47.4	1107.7	47.4	1322.14
47.5	2357.84	47.4	545.504	47.5	2082.7	47.5	1300.6	47.5	2089.6	47.6	1588.26	47.5	2144.5	47.5	1108.05	47.5	1322.81
47.6	2358.4	47.5	545.722	47.6	2083.47	47.6	1300.98	47.6	2090.47	47.7	1588.67	47.6	2145.14	47.6	1108.39	47.6	1323.48
47.7	2359	47.6	545.924	47.7	2084.25	47.7	1301.37	47.7	2091.27	47.8	1589.06	47.7	2145.81	47.7	1108.69	47.7	1324.16
47.8	2359.56	47.7	546.125	47.8	2085.01	47.8	1301.78	47.8	2092.14	47.9	1589.47	47.8	2146.47	47.8	1108.98	47.8	1324.86
47.9	2360.1	47.8	546.324	47.9	2085.76	47.9	1302.19	47.9	2092.96	48	1589.88	47.9	2147.12	47.9	1109.3	47.9	1325.53
48	2360.68	47.9	546.53	48	2086.51	48	1302.57	48	2093.8	48.1	1590.29	48	2147.75	48	1109.64	48	1326.19
48.1	2361.25	48	546.746	48.1	2087.25	48.1	1302.94	48.1	2094.64	48.2	1590.71	48.1	2148.4	48.1	1109.97	48.1	1326.84
48.2	2361.82	48.1	546.944	48.2	2087.96	48.2	1303.3	48.2	2095.49	48.3	1591.09	48.2	2149.03	48.2	1110.27	48.2	1327.47
48.3	2362.41	48.2	547.18	48.3	2088.68	48.3	1303.66	48.3	2096.28	48.4	1591.48	48.3	2149.65	48.3	1110.59	48.3	1328.13
48.4	2362.98	48.3	547.397	48.4	2089.43	48.4	1304.02	48.4	2097.05	48.5	1591.87	48.4	2150.31	48.4	1110.88	48.4	1328.78
48.5	2363.55	48.4	547.609	48.5	2090.15	48.5	1304.41	48.5	2097.84	48.6	1592.28	48.5	2150.93	48.5	1111.18	48.5	1329.45
48.6	2364.14	48.5	547.824	48.6	2090.84	48.6	1304.76	48.6	2098.59	48.7	1592.69	48.6	2151.57	48.6	1111.45	48.6	1330.13
48.7	2364.73	48.6	548.016	48.7	2091.55	48.7	1305.05	48.7	2099.37	48.8	1593.1	48.7	2152.17	48.7	1111.75	48.7	1330.73
48.8	2365.3	48.7	548.205	48.8	2092.24	48.8	1305.43	48.8	2100.13	48.9	1593.52	48.8	2152.75	48.8	1112.04	48.8	1331.33
48.9	2365.9	48.8	548.426	48.9	2092.95	48.9	1305.69	48.9	2100.9	49	1593.95	48.9	2153.31	48.9	1112.34	48.9	1331.95
49	2366.44	48.9	548.612	49	2093.62	49	1306.01	49	2101.66	49.1	1594.35	49	2153.86	49	1112.66	49	1332.58
49.1	2367	49	548.769	49.1	2094.3	49.1	1306.38	49.1	2102.39	49.2	1594.78	49.1	2154.43	49.1	1112.95	49.1	1333.19
49.2	2367.56	49.1	548.945	49.2	2094.98	49.2	1306.75	49.2	2103.15	49.3	1595.17	49.2	2154.99	49.2	1113.25	49.2	1333.81
49.3	2368.12	49.2	549.127	49.3	2095.66	49.3	1307.13	49.3	2103.9	49.4	1595.62	49.3	2155.54	49.3	1113.57	49.3	1334.43
49.4	2368.68	49.3	549.293	49.4	2096.34	49.4	1307.48	49.4	2104.62	49.5	1596.07	49.4	2156.12	49.4	1113.87	49.4	1335.03
49.5	2369.24	49.4	549.48	49.5	2097.01	49.5	1307.86	49.5	2105.37	49.6	1596.47	49.5	2156.67	49.5	1114.18	49.5	1335.63
49.6	2369.77	49.5	549.676	49.6	2097.71	49.6	1308.23	49.6	2106.12	49.7	1596.83	49.6	2157.23	49.6	1114.48	49.6	1336.23
49.7	2370.28	49.6	549.875	49.7	2098.37	49.7	1308.59	49.7	2106.87	49.8	1597.24	49.7	2157.78	49.7	1114.81	49.7	1336.82
49.8	2370.79	49.7	550.089	49.8	2099.05	49.8	1308.91	49.8	2107.61	49.9	1597.64	49.8	2158.37	49.8	1115.1	49.8	1337.39
49.9	2371.32	49.8	550.273	49.9	2099.69	49.9	1309.26	49.9	2108.35	50	1598.06	49.9	2158.96	49.9	1115.43	49.9	1337.99
50	2371.86	49.9	550.487	50	2100.32	50	1309.6	50	2109.08	50.1	1598.45	50	2159.55	50	1115.75	50	1338.56
50.1	2372.4	50	550.71	50.1	2100.98	50.1	1309.92	50.1	2109.78	50.2	1598.84	50.1	2160.15	50.1	1116.05	50.1	1339.15
50.2	2372.91	50.1	550.922	50.2	2101.64	50.2	1310.28	50.2	2110.51	50.3	1599.21	50.2	2160.72	50.2	1116.35	50.2	1339.73
50.3	2373.41	50.2	551.12	50.3	2102.3	50.3	1310.63	50.3	2111.2	50.4	1599.61	50.3	2161.27	50.3	1116.67	50.3	1340.31
50.4	2373.92	50.3	551.288	50.4	2102.94	50.4	1311.01	50.4	2111.93	50.5	1599.98	50.4	2161.79	50.4	1116.97	50.4	1340.87
50.5	2374.41	50.4	551.497	50.5	2103.6	50.5	1311.39	50.5	2112.66	50.6	1600.39	50.5	2162.33	50.5	1117.29	50.5	1341.41
50.6	2374.93	50.5	551.679	50.6	2104.22	50.6	1311.71	50.6	2113.33	50.7	1600.81	50.6	2162.86	50.6	1117.6	50.6	1341.97
50.7	2375.45	50.6	551.855	50.7	2104.85	50.7	1312.07	50.7	2113.99	50.8	1601.16	50.7	2163.41	50.7	1117.92	50.7	1342.51
50.8	2375.95	50.7	552.07	50.8	2105.5	50.8	1312.42	50.8	2114.68	50.9	1601.53	50.8	2163.98	50.8	1118.22	50.8	1343.05
50.9	2376.47	50.8	552.261	50.9	2106.13	50.9	1312.8	50.9	2115.38	51	1601.91	50.9	2164.53	50.9	1118.5	50.9	1343.6
51	2376.98	50.9	552.434	51	2106.72	51	1313.19	51	2116.02	51.1	1602.24	51	2165.04	51	1118.77	51	1344.13
51.1	2377.49	51	552.605	51.1	2107.28	51.1	1313.53	51.1	2116.65	51.2	1602.61	51.1	2165.57	51.1	1119.08	51.1	1344.65
51.2	2377.99	51.1	552.772	51.2	2107.85	51.2	1313.7	51.2	2117.29	51.3	1602.98	51.2	2166.11	51.2	1119.38	51.2	1345.15
51.3	2378.51	51.2	552.97	51.3	2108.43	51.3	1314.03	51.3	2117.93	51.4	1603.32	51.3	2166.7	51.3	1119.68	51.3	1345.66
51.4	2379.04	51.3	553.124	51.4	2109.07	51.4	1314.39	51.4	2118.57	51.5	1603.67	51.4	2167.22	51.4	1119.94	51.4	1346.17
51.5	2379.57	51.4	553.269	51.5	2109.7	51.5	1314.72	51.5	2119.19	51.6	1604.02	51.5	2167.79	51.5	1120.2	51.5	1346.68
51.6	2380.07	51.5	553.465	51.6	2110.35	51.6	1315.03	51.6	2119.86	51.7	1604.34	51.6	2168.3	51.6	1120.47	51.6	1347.2
51.7	2380.59	51.6	553.573	51.7	2110.98	51.7	1315.33	51.7	2120.51	51.8	1604.68	51.7	2168.81	51.7	1120.76	51.7	1347.69
51.8	2381.11	51.7	553.773	51.8	2111.62	51.8	1315.64	51.8	2121.16	51.9	1605.02	51.8	2169.34	51.8	1121.02	51.8	1348.21
51.9	2381.59	51.8	553.973	51.9	2112.21	51.9	1315.98	51.9	2121.8	52	1605.35	51.9	2169.84	51.9	1121.31	51.9	1348.72
52	2382.08	51.9	554.145	52	2112.8	52	1316.31	52	2122.42	52.1	1605.69	52	2170.4	52	1121.6	52	1349.21
52.1	2382.57	52	554.37	52.1	2113.36	52.1	1316.64	52.1	2123.01	52.2	1606.06	52.1	2170.93	52.1	1121.89	52.1	1349.7
52.2	2383.05	52.1	554.55	52.2	2113.93	52.2	1316.92	52.2	2123.65	52.3	1606.41	52.2	2171.44	52.2	1122.16	52.2	1350.19
52.3	2383.54	52.2	554.727	52.3	2114.49	52.3	1317.21	52.3	2124.3	52.4	1606.77	52.3	2171.95	52.3	1122.41	52.3	1350.68
52.4	2384.01	52.3	554.924	52.4	2115.03	52.4	1317.49	52.4	2124.94	52.5	1607.11	52.4	2172.5	52.4	1122.72	52.4	1351.14
52.5	2384.47	52.4	555.113	52.5	2115.6	52.5	1317.8	52.5	2125.55	52.6	1607.44	52.5	2173.05	52.5	1123.03	52.5	1351.61
52.6	2384.92	52.5	555.312	52.6	2116.2	52.6	1318.12	52.6	2126.14	52.7	1607.76	52.6	2173.53	52.6	1123.32	52.6	1352.08
52.7	2385.38	52.6	555.477	52.7	2116.77	52.7	1318.44	52.7	2126.72	52.8	1608.12	52.7	2173.99	52.7	1123.63	52.7	1352.51
52.8	2385.82	52.7	555.648	52.8	2117.32	52.8	1318.77	52.8	2127.3	52.9	1608.43	52.8	2174.43	52.8	1123.93	52.8	1352.97
52.9	2386.31	52.8	555.852	52.9	2117.87	52.9	1319.09	52.9	2127.9	53	1608.76	52.9	2174.91	52.9	1124.19	52.9	1353.43
53	2386.79	52.9	556.058	53	2118.43	53	1319.4	53	2128.49	53.1	1609.1	53	2175.39	53	1124.43	53	1353.88
53.1	2387.27	53	556.262	53.1	2118.98	53.1	1319.69	53.1	2129.08	53.2	1609.42	53.1	2175.83	53.1	1124.7	53.1	1354.32
53.2	2387.73	53.1	556.405	53.2	2119.51	53.2	1320.01	53.2	2129.69	53.3	1609.72	53.2	2176.3	53.2	1124.97	53.2	1354.76
53.3	2388.2	53.2	556.586	53.3	2120.07	53.3	1320.33	53.3	2130.27	53.4	1610.05	53.3	2176.8	53.3	1125.26	53.3	1355.21
53.4	2388.67	53.3	556.718	53.4	2120.61	53.4	1320.63	53.4	2130.83	53.5	1610.39	53.4	2177.3	53.4	1125.56	53.4	1355.66
53.5	2389.13	53.4	556.859	53.5	2121.14	53.5	1320.95	53.5	2131.43	53.6	1610.75	53.5	2177.78	53.5	1125.82	53.5	1356.1
53.6	2389.6	53.5	556.968	53.6	2121.67	53.6	1321.27	53.6	2132.02	53.7	1611.09	53.6	2178.25	53.6	1126.09	53.6	1356.57
53.7	2390.09	53.6	557.203	53.7	2122.19	53.7	1321.59	53.7	2132.63	53.8	1611.4	53.7	2178.72	53.7	1126.38	53.7	1357.05
53.8	2390.53	53.7	557.594	53.8	2122.7	53.8	1321.87	53.8	2133.25	53.9	1611.75	53.8	2179.22	53.8	1126.66	53.8	1357.52
53.9	2391	53.8	557.863	53.9	2123.21	53.9	1322.14	53.9	2133.86	54	1612.09	53.9	2179.71	53.9	1126.96	53.9	1357.97
54	2391.48	53.9	557.952	54	2123.73	54	1322.46	54	2134.48	54.1	1612.39	54	2180.18	54	1127.26	54	1358.42
54.1	2391.91	54	558.082	54.1	2124.26	54.1	1322.75	54.1	2135.09	54.2	1612.73	54.1	2180.63	54.1	1127.55	54.1	1358.92
54.2	2392.37	54.1	558.247	54.2	2124.76	54.2	1323.07	54.2	2135.71	54.3	1613.1	54.2	2181.1	54.2	1127.82	54.2	1359.37
54.3	2392.84	54.2	558.416	54.3	2125.26	54.3	1323.39	54.3	2136.32	54.4	1613.41	54.3	2181.57	54.3	1128.1	54.3	1359.78
54.4	2393.28	54.3	558.605	54.4	2125.77	54.4	1323.7	54.4	2136.96	54.5	1613.72	54.4	2182	54.4	1128.35	54.4	1360.18
54.5	2393.73	54.4	558.773	54.5	2126.27	54.5	1324.01	54.5	2137.6	54.6	1614	54.5	2182.44	54.5	1128.6	54.5	1360.63
54.6	2394.18	54.5	558.955	54.6	2126.79	54.6	1324.32	54.6	2138.2	54.7	1614.31	54.6	2182.91	54.6	1128.86	54.6	1361.04
54.7	2394.63	54.6	559.141	54.7	2127.31	54.7	1324.63	54.7	2138.65	54.8	1614.61	54.7	2183.37	54.7	1129.14	54.7	1361.43
54.8	2395.11	54.7	559.344	54.8	2127.84	54.8	1324.95	54.8	2139.07	54.9	1614.92	54.8	2183.84	54.8	1129.41	54.8	1361.82
54.9	2395.55	54.8	559.519	54.9	2128.34	54.9	1325.26	54.9	2139.57	55	1615.23	54.9	2184.29	54.9	1129.63	54.9	1362.23
55	2396	54.9	559.707	55	2128.85	55	1325.57	55	2140.19	55.1	1615.49	55	2184.76	55	1129.85	55	1362.66
55.1	2396.44	55	559.877	55.1	2129.36	55.1	1325.89	55.1	2140.76	55.2	1615.84	55.1	2185.24	55.1	1130.1	55.1	1363.06
55.2	2396.9	55.1	560.043	55.2	2129.86	55.2	1326.21	55.2	2141.33	55.3	1616.18	55.2	2185.72	55.2	1130.34	55.2	1363.49
55.3	2397.33	55.2	560.223	55.3	2130.34	55.3	1326.52	55.3	2141.84	55.4	1616.48	55.3	2186.2	55.3	1130.59	55.3	1363.9
55.4	2397.76	55.3	560.383	55.4	2130.86	55.4	1326.82	55.4	2142.36	55.5	1616.79	55.4	2186.67	55.4	1130.83	55.4	1364.25
55.5	2398.23	55.4	560.537	55.5	2131.37	55.5	1327.11	55.5	2142.93	55.6	1617.11	55.5	2187.14	55.5	1131.09	55.5	1364.62
55.6	2398.67	55.5	560.676	55.6	2131.88	55.6	1327.4	55.6	2143.46	55.7	1617.43	55.6	2187.59	55.6	1131.35	55.6	1365.02
55.7	2399.1	55.6	560.839	55.7	2132.35	55.7	1327.68	55.7	2143.99	55.8	1617.77	55.7	2188.04	55.7	1131.6	55.7	1365.41
55.8	2399.56	55.7	561.023	55.8	2132.83	55.8	1327.93	55.8	2144.49	55.9	1618.07	55.8	2188.51	55.8	1131.82	55.8	1365.85
55.9	2400.02	55.8	561.148	55.9	2133.3	55.9	1328.21	55.9	2145.03	56	1618.37	55.9	2188.94	55.9	1132.06	55.9	1366.26
56	2400.41	55.9	561.313	56	2133.79	56	1328.48	56	2145.55	56.1	1618.66	56	2189.38	56	1132.3	56	1366.66
56.1	2400.77	56	561.46	56.1	2134.26	56.1	1328.77	56.1	2146.07	56.2	1618.94	56.1	2189.81	56.1	1132.55	56.1	1367.04
56.2	2401.02	56.1	561.589	56.2	2134.73	56.2	1329.02	56.2	2146.59	56.3	1619.22	56.2	2190.24	56.2	1132.8	56.2	1367.43
56.3	2401.43	56.2	561.754	56.3	2135.21	56.3	1329.31	56.3	2147.09	56.4	1619.49	56.3	2190.69	56.3	1133.06	56.3	1367.84
56.4	2401.89	56.3	561.925	56.4	2135.7	56.4	1329.57	56.4	2147.61	56.5	1619.78	56.4	2191.12	56.4	1133.32	56.4	1368.23
56.5	2402.3	56.4	562.098	56.5	2136.18	56.5	1329.83	56.5	2148.12	56.6	1620.07	56.5	2191.55	56.5	1133.55	56.5	1368.61
56.6	2402.7	56.5	562.293	56.6	2136.63	56.6	1330.1	56.6	2148.61	56.7	1620.36	56.6	2191.96	56.6	1133.8	56.6	1368.99
56.7	2403.07	56.6	562.463	56.7	2137.09	56.7	1330.39	56.7	2149.12	56.8	1620.64	56.7	2192.39	56.7	1134.03	56.7	1369.35
56.8	2403.49	56.7	562.625	56.8	2137.57	56.8	1330.68	56.8	2149.63	56.9	1620.89	56.8	2192.8	56.8	1134.29	56.8	1369.74
56.9	2403.89	56.8	562.766	56.9	2138.03	56.9	1330.99	56.9	2150.12	57	1621.19	56.9	2193.23	56.9	1134.54	56.9	1370.12
57	2404.27	56.9	562.941	57	2138.49	57	1331.26	57	2150.59	57.1	1621.46	57	2193.67	57	1134.79	57	1370.49
57.1	2404.65	57	563.113	57.1	2138.94	57.1	1331.55	57.1	2151.07	57.2	1621.76	57.1	2194.11	57.1	1135.01	57.1	1370.88
57.2	2405.02	57.1	563.284	57.2	2139.36	57.2	1331.84	57.2	2151.55	57.3	1622.02	57.2	2194.53	57.2	1135.25	57.2	1371.25
57.3	2405.41	57.2	563.416	57.3	2139.81	57.3	1332.15	57.3	2152.07	57.4	1622.35	57.3	2194.94	57.3	1135.48	57.3	1371.62
57.4	2405.79	57.3	563.551	57.4	2140.27	57.4	1332.43	57.4	2152.58	57.5	1622.63	57.4	2195.34	57.4	1135.73	57.4	1372
57.5	2406.17	57.4	563.695	57.5	2140.71	57.5	1332.71	57.5	2153.06	57.6	1622.9	57.5	2195.76	57.5	1135.97	57.5	1372.39
57.6	2406.55	57.5	563.855	57.6	2141.14	57.6	1333	57.6	2153.55	57.7	1623.18	57.6	2196.17	57.6	1136.23	57.6	1372.77
57.7	2406.95	57.6	563.987	57.7	2141.6	57.7	1333.28	57.7	2154.04	57.8	1623.47	57.7	2196.6	57.7	1136.46	57.7	1373.16
57.8	2407.35	57.7	564.148	57.8	2142.05	57.8	1333.59	57.8	2154.51	57.9	1623.76	57.8	2196.99	57.8	1136.71	57.8	1373.56
57.9	2407.75	57.8	564.254	57.9	2142.5	57.9	1333.87	57.9	2155	58	1624.06	57.9	2197.41	57.9	1136.92	57.9	1373.91
58	2408.13	57.9	564.395	58	2142.9	58	1334.13	58	2155.49	58.1	1624.34	58	2197.8	58	1137.16	58	1374.27
58.1	2408.51	58	564.545	58.1	2143.34	58.1	1334.42	58.1	2155.98	58.2	1624.62	58.1	2198.16	58.1	1137.39	58.1	1374.63
58.2	2408.89	58.1	564.664	58.2	2143.8	58.2	1334.71	58.2	2156.39	58.3	1624.92	58.2	2198.52	58.2	1137.64	58.2	1375.01
58.3	2409.29	58.2	564.793	58.3	2144.24	58.3	1334.99	58.3	2156.83	58.4	1625.23	58.3	2198.89	58.3	1137.88	58.3	1375.35
58.4	2409.66	58.3	564.961	58.4	2144.66	58.4	1335.24	58.4	2157.27	58.5	1625.52	58.4	2199.26	58.4	1138.11	58.4	1375.68
58.5	2410.04	58.4	565.144	58.5	2145.08	58.5	1335.51	58.5	2157.7	58.6	1625.74	58.5	2199.59	58.5	1138.34	58.5	1376.03
58.6	2410.41	58.5	565.309	58.6	2145.49	58.6	1335.78	58.6	2158.15	58.7	1625.98	58.6	2199.89	58.6	1138.59	58.6	1376.38
58.7	2410.77	58.6	565.476	58.7	2145.9	58.7	1336.09	58.7	2158.57	58.8	1626.2	58.7	2200.28	58.7	1138.8	58.7	1376.72
58.8	2411.14	58.7	565.616	58.8	2146.32	58.8	1336.38	58.8	2159.01	58.9	1626.44	58.8	2200.68	58.8	1139.05	58.8	1377.07
58.9	2411.53	58.8	565.809	58.9	2146.77	58.9	1336.64	58.9	2159.47	59	1626.7	58.9	2201.06	58.9	1139.27	58.9	1377.4
59	2411.87	58.9	565.989	59	2147.23	59	1336.91	59	2159.93	59.1	1626.96	59	2201.46	59	1139.5	59	1377.74
59.1	2412.24	59	566.162	59.1	2147.66	59.1	1337.18	59.1	2160.38	59.2	1627.2	59.1	2201.86	59.1	1139.72	59.1	1378.07
59.2	2412.6	59.1	566.34	59.2	2148.1	59.2	1337.44	59.2	2160.84	59.3	1627.46	59.2	2202.23	59.2	1139.96	59.2	1378.39
59.3	2412.97	59.2	566.512	59.3	2148.53	59.3	1337.71	59.3	2161.31	59.4	1627.71	59.3	2202.62	59.3	1140.21	59.3	1378.71
59.4	2413.35	59.3	566.687	59.4	2148.94	59.4	1337.98	59.4	2161.78	59.5	1627.98	59.4	2203	59.4	1140.45	59.4	1379.06
59.5	2413.71	59.4	566.868	59.5	2149.38	59.5	1338.25	59.5	2162.22	59.6	1628.24	59.5	2203.38	59.5	1140.68	59.5	1379.42
59.6	2414.09	59.5	567.007	59.6	2149.82	59.6	1338.52	59.6	2162.69	59.7	1628.53	59.6	2203.95	59.6	1140.92	59.6	1379.76
59.7	2414.47	59.6	567.191	59.7	2150.29	59.7	1338.83	59.7	2163.16	59.8	1628.81	59.7	2204.58	59.7	1141.16	59.7	1380.09
59.8	2414.85	59.7	567.386	59.8	2150.69	59.8	1339.09	59.8	2163.56	59.9	1629.12	59.8	2204.8	59.8	1141.43	59.8	1380.4
59.9	2415.21	59.8	567.543	59.9	2151.06	59.9	1339.35	59.9	2164	60	1629.4	59.9	2205.14	59.9	1141.66	59.9	1380.72
60	2415.59	59.9	567.718	60	2151.44	60	1339.6	60	2164.43	60.1	1629.68	60	2205.52	60	1141.91	60	1381.04
60.1	2415.96	60	567.888	60.1	2151.82	60.1	1339.89	60.1	2164.84	60.2	1629.96	60.1	2205.84	60.1	1142.15	60.1	1381.36
60.2	2416.3	60.1	568.045	60.2	2152.17	60.2	1340.17	60.2	2165.26	60.3	1630.26	60.2	2206.2	60.2	1142.39	60.2	1381.7
60.3	2416.66	60.2	568.203	60.3	2152.59	60.3	1340.42	60.3	2165.69	60.4	1630.56	60.3	2206.57	60.3	1142.61	60.3	1382.02
60.4	2417.02	60.3	568.352	60.4	2152.96	60.4	1340.67	60.4	2166.1	60.5	1630.84	60.4	2206.93	60.4	1142.85	60.4	1382.32
60.5	2417.38	60.4	568.507	60.5	2153.31	60.5	1340.95	60.5	2166.51	60.6	1631.09	60.5	2207.3	60.5	1143.09	60.5	1382.63
60.6	2417.71	60.5	568.645	60.6	2153.7	60.6	1341.16	60.6	2166.93	60.7	1631.37	60.6	2207.7	60.6	1143.33	60.6	1382.93
60.7	2418.07	60.6	568.805	60.7	2154.13	60.7	1341.4	60.7	2167.37	60.8	1631.64	60.7	2208.06	60.7	1143.58	60.7	1383.19
60.8	2418.41	60.7	568.948	60.8	2154.52	60.8	1341.63	60.8	2167.8	60.9	1631.93	60.8	2208.39	60.8	1143.78	60.8	1383.48
60.9	2418.76	60.8	569.094	60.9	2154.9	60.9	1341.99	60.9	2168.24	61	1632.2	60.9	2208.77	60.9	1143.97	60.9	1383.8
61	2419.1	60.9	569.254	61	2155.31	61	1342.36	61	2168.67	61.1	1632.47	61	2209.16	61	1144.17	61	1384.11
61.1	2419.45	61	569.373	61.1	2155.69	61.1	1342.74	61.1	2169.11	61.2	1632.73	61.1	2209.54	61.1	1144.39	61.1	1384.38
61.2	2419.81	61.1	569.523	61.2	2156.1	61.2	1342.59	61.2	2169.52	61.3	1632.99	61.2	2209.93	61.2	1144.64	61.2	1384.66
61.3	2420.17	61.2	569.652	61.3	2156.48	61.3	1342.79	61.3	2169.97	61.4	1633.24	61.3	2210.33	61.3	1144.84	61.3	1384.96
61.4	2420.54	61.3	569.796	61.4	2156.89	61.4	1343.11	61.4	2170.4	61.5	1633.47	61.4	2210.69	61.4	1145.07	61.4	1385.26
61.5	2420.9	61.4	569.945	61.5	2157.27	61.5	1343.42	61.5	2170.84	61.6	1633.68	61.5	2211.07	61.5	1145.28	61.5	1385.56
61.6	2421.25	61.5	570.109	61.6	2157.64	61.6	1343.73	61.6	2171.25	61.7	1633.91	61.6	2211.43	61.6	1145.49	61.6	1385.84
61.7	2421.59	61.6	570.281	61.7	2158.01	61.7	1343.99	61.7	2171.66	61.8	1634.18	61.7	2211.8	61.7	1145.71	61.7	1386.11
61.8	2421.93	61.7	570.409	61.8	2158.38	61.8	1344.25	61.8	2172.05	61.9	1634.41	61.8	2212.19	61.8	1145.91	61.8	1386.42
61.9	2422.27	61.8	570.523	61.9	2158.79	61.9	1344.52	61.9	2172.47	62	1634.64	61.9	2212.56	61.9	1146.13	61.9	1386.7
62	2422.61	61.9	570.687	62	2159.18	62	1344.75	62	2172.86	62.1	1634.89	62	2212.92	62	1146.35	62	1387
62.1	2422.97	62	570.868	62.1	2159.59	62.1	1345	62.1	2173.25	62.2	1635.09	62.1	2213.29	62.1	1146.56	62.1	1387.28
62.2	2423.29	62.1	571.045	62.2	2159.98	62.2	1345.25	62.2	2173.65	62.3	1635.33	62.2	2213.65	62.2	1146.79	62.2	1387.56
62.3	2423.63	62.2	571.191	62.3	2160.38	62.3	1345.48	62.3	2174.04	62.4	1635.57	62.3	2214	62.3	1147.02	62.3	1387.87
62.4	2423.95	62.3	571.332	62.4	2160.74	62.4	1345.72	62.4	2174.44	62.5	1635.82	62.4	2214.36	62.4	1147.26	62.4	1388.16
62.5	2424.29	62.4	571.504	62.5	2161.12	62.5	1345.96	62.5	2174.85	62.6	1636.12	62.5	2214.73	62.5	1147.48	62.5	1388.44
62.6	2424.61	62.5	571.667	62.6	2161.5	62.6	1346.19	62.6	2175.22	62.7	1636.38	62.6	2215.09	62.6	1147.69	62.6	1388.74
62.7	2424.95	62.6	571.816	62.7	2161.89	62.7	1346.42	62.7	2175.61	62.8	1636.63	62.7	2215.44	62.7	1147.91	62.7	1389.04
62.8	2425.28	62.7	571.973	62.8	2162.3	62.8	1346.67	62.8	2176.01	62.9	1636.9	62.8	2215.76	62.8	1148.12	62.8	1389.36
62.9	2425.6	62.8	572.16	62.9	2162.68	62.9	1346.92	62.9	2176.39	63	1637.19	62.9	2216.13	62.9	1148.33	62.9	1389.68
63	2425.95	62.9	572.324	63	2163.05	63	1347.18	63	2176.77	63.1	1637.41	63	2216.48	63	1148.55	63	1389.98
63.1	2426.29	63	572.48	63.1	2163.39	63.1	1347.45	63.1	2177.18	63.2	1637.59	63.1	2216.84	63.1	1148.74	63.1	1390.32
63.2	2426.6	63.1	572.636	63.2	2163.72	63.2	1347.72	63.2	2177.58	63.3	1637.8	63.2	2217.19	63.2	1148.94	63.2	1390.59
63.3	2426.94	63.2	572.781	63.3	2164.08	63.3	1347.96	63.3	2177.96	63.4	1638	63.3	2217.55	63.3	1149.14	63.3	1390.87
63.4	2427.28	63.3	572.934	63.4	2164.44	63.4	1348.23	63.4	2178.37	63.5	1638.21	63.4	2217.89	63.4	1149.32	63.4	1391.14
63.5	2427.61	63.4	573.086	63.5	2164.81	63.5	1348.48	63.5	2178.73	63.6	1638.44	63.5	2218.22	63.5	1149.5	63.5	1391.41
63.6	2427.9	63.5	573.218	63.6	2165.15	63.6	1348.73	63.6	2179.08	63.7	1638.64	63.6	2218.56	63.6	1149.71	63.6	1391.7
63.7	2428.24	63.6	573.366	63.7	2165.51	63.7	1348.99	63.7	2179.48	63.8	1638.86	63.7	2218.9	63.7	1149.93	63.7	1391.99
63.8	2428.54	63.7	573.516	63.8	2165.85	63.8	1349.24	63.8	2179.86	63.9	1639.08	63.8	2219.25	63.8	1150.14	63.8	1392.27
63.9	2428.85	63.8	573.664	63.9	2166.18	63.9	1349.49	63.9	2180.26	64	1639.32	63.9	2219.6	63.9	1150.34	63.9	1392.53
64	2429.16	63.9	573.808	64	2166.51	64	1349.73	64	2180.67	64.1	1639.56	64	2219.95	64	1150.54	64	1392.82
64.1	2429.46	64	573.937	64.1	2166.87	64.1	1349.99	64.1	2181.04	64.2	1639.8	64.1	2220.28	64.1	1150.72	64.1	1393.09
64.2	2429.79	64.1	574.082	64.2	2167.2	64.2	1350.22	64.2	2181.38	64.3	1640.05	64.2	2220.63	64.2	1150.91	64.2	1393.37
64.3	2430.08	64.2	574.218	64.3	2167.55	64.3	1350.44	64.3	2181.73	64.4	1640.29	64.3	2220.96	64.3	1151.12	64.3	1393.63
64.4	2430.42	64.3	574.388	64.4	2167.89	64.4	1350.69	64.4	2182.09	64.5	1640.54	64.4	2221.27	64.4	1151.31	64.4	1393.89
64.5	2430.76	64.4	574.526	64.5	2168.23	64.5	1350.94	64.5	2182.45	64.6	1640.77	64.5	2221.59	64.5	1151.5	64.5	1394.16
64.6	2431.1	64.5	574.669	64.6	2168.57	64.6	1351.19	64.6	2182.82	64.7	1641.01	64.6	2221.92	64.6	1151.7	64.6	1394.39
64.7	2431.46	64.6	574.803	64.7	2168.91	64.7	1351.46	64.7	2183.2	64.8	1641.25	64.7	2222.25	64.7	1151.87	64.7	1394.67
64.8	2431.78	64.7	574.946	64.8	2169.24	64.8	1351.69	64.8	2183.56	64.9	1641.5	64.8	2222.59	64.8	1152.07	64.8	1394.92
64.9	2432.13	64.8	575.089	64.9	2169.58	64.9	1351.93	64.9	2183.93	65	1641.72	64.9	2222.9	64.9	1152.22	64.9	1395.2
65	2432.46	64.9	575.245	65	2169.92	65	1352.16	65	2184.3	65.1	1641.93	65	2223.22	65	1152.39	65	1395.45
65.1	2432.78	65	575.383	65.1	2170.27	65.1	1352.39	65.1	2184.65	65.2	1642.16	65.1	2223.53	65.1	1152.57	65.1	1395.71
65.2	2433.11	65.1	575.476	65.2	2170.59	65.2	1352.61	65.2	2185.02	65.3	1642.39	65.2	2223.84	65.2	1152.79	65.2	1395.95
65.3	2433.45	65.2	575.602	65.3	2170.93	65.3	1352.84	65.3	2185.39	65.4	1642.62	65.3	2224.15	65.3	1152.99	65.3	1396.21
65.4	2433.75	65.3	575.742	65.4	2171.26	65.4	1353.08	65.4	2185.76	65.5	1642.84	65.4	2224.46	65.4	1153.18	65.4	1396.47
65.5	2434.06	65.4	575.866	65.5	2171.59	65.5	1353.31	65.5	2186.12	65.6	1643.05	65.5	2224.8	65.5	1153.29	65.5	1396.74
65.6	2434.35	65.5	576	65.6	2171.93	65.6	1353.54	65.6	2186.48	65.7	1643.29	65.6	2225.12	65.6	1153.63	65.6	1397.01
65.7	2434.66	65.6	576.157	65.7	2172.25	65.7	1353.74	65.7	2186.85	65.8	1643.5	65.7	2225.44	65.7	1153.99	65.7	1397.23
65.8	2434.97	65.7	576.308	65.8	2172.58	65.8	1353.95	65.8	2187.19	65.9	1643.71	65.8	2225.75	65.8	1154.05	65.8	1397.48
65.9	2435.27	65.8	576.448	65.9	2172.91	65.9	1354.21	65.9	2187.51	66	1643.93	65.9	2226.06	65.9	1154.28	65.9	1397.73
66	2435.54	65.9	576.594	66	2173.23	66	1354.49	66	2187.86	66.1	1644.16	66	2226.37	66	1154.5	66	1397.98
66.1	2435.83	66	576.769	66.1	2173.54	66.1	1354.75	66.1	2188.18	66.2	1644.39	66.1	2226.7	66.1	1154.69	66.1	1398.23
66.2	2436.13	66.1	576.902	66.2	2173.88	66.2	1355.03	66.2	2188.51	66.3	1644.6	66.2	2227.03	66.2	1154.9	66.2	1398.5
66.3	2436.38	66.2	577.051	66.3	2174.21	66.3	1355.3	66.3	2188.84	66.4	1644.84	66.3	2227.37	66.3	1155.09	66.3	1398.75
66.4	2436.69	66.3	577.211	66.4	2174.56	66.4	1355.56	66.4	2189.18	66.5	1645.06	66.4	2227.69	66.4	1155.31	66.4	1398.99
66.5	2437.01	66.4	577.359	66.5	2174.86	66.5	1355.82	66.5	2189.53	66.6	1645.27	66.5	2228	66.5	1155.54	66.5	1399.27
66.6	2437.31	66.5	577.487	66.6	2175.16	66.6	1355.96	66.6	2189.88	66.7	1645.5	66.6	2228.32	66.6	1155.74	66.6	1399.53
66.7	2437.63	66.6	577.618	66.7	2175.5	66.7	1356.12	66.7	2190.2	66.8	1645.71	66.7	2228.62	66.7	1155.96	66.7	1399.78
66.8	2437.93	66.7	577.745	66.8	2175.85	66.8	1356.29	66.8	2190.54	66.9	1645.93	66.8	2228.93	66.8	1156.18	66.8	1400.04
66.9	2438.22	66.8	577.871	66.9	2176.16	66.9	1356.5	66.9	2190.89	67	1646.13	66.9	2229.23	66.9	1156.4	66.9	1400.27
67	2438.52	66.9	578.016	67	2176.46	67	1356.73	67	2191.25	67.1	1646.32	67	2229.54	67	1156.64	67	1400.5
67.1	2438.82	67	578.133	67.1	2176.77	67.1	1356.96	67.1	2191.58	67.2	1646.5	67.1	2229.84	67.1	1156.86	67.1	1400.74
67.2	2439.09	67.1	578.28	67.2	2177.12	67.2	1357.19	67.2	2191.93	67.3	1646.68	67.2	2230.11	67.2	1157.05	67.2	1400.99
67.3	2439.36	67.2	578.391	67.3	2177.44	67.3	1357.41	67.3	2192.27	67.4	1646.92	67.3	2230.41	67.3	1157.26	67.3	1401.25
67.4	2439.66	67.3	578.57	67.4	2177.76	67.4	1357.62	67.4	2192.59	67.5	1647.12	67.4	2230.69	67.4	1157.45	67.4	1401.52
67.5	2439.93	67.4	578.75	67.5	2178.1	67.5	1357.84	67.5	2192.94	67.6	1647.3	67.5	2230.99	67.5	1157.66	67.5	1401.77
67.6	2440.23	67.5	578.914	67.6	2178.45	67.6	1358.09	67.6	2193.26	67.7	1647.49	67.6	2231.3	67.6	1157.86	67.6	1402.01
67.7	2440.5	67.6	579.058	67.7	2178.77	67.7	1358.35	67.7	2193.57	67.8	1647.69	67.7	2231.61	67.7	1158.08	67.7	1402.27
67.8	2440.8	67.7	579.234	67.8	2179.08	67.8	1358.56	67.8	2193.92	67.9	1647.9	67.8	2231.92	67.8	1158.25	67.8	1402.52
67.9	2441.07	67.8	579.402	67.9	2179.4	67.9	1358.79	67.9	2194.26	68	1648.08	67.9	2232.23	67.9	1158.43	67.9	1402.78
68	2441.36	67.9	579.559	68	2179.72	68	1359.03	68	2194.59	68.1	1648.36	68	2232.55	68	1158.62	68	1403.06
68.1	2441.66	68	579.698	68.1	2180.05	68.1	1359.26	68.1	2194.92	68.2	1648.55	68.1	2232.88	68.1	1158.78	68.1	1403.33
68.2	2441.99	68.1	579.847	68.2	2180.37	68.2	1359.48	68.2	2195.27	68.3	1648.77	68.2	2233.2	68.2	1158.96	68.2	1403.56
68.3	2442.31	68.2	579.97	68.3	2180.68	68.3	1359.72	68.3	2195.6	68.4	1649.03	68.3	2233.49	68.3	1159.2	68.3	1403.8
68.4	2442.61	68.3	580.089	68.4	2180.97	68.4	1359.95	68.4	2195.97	68.5	1649.28	68.4	2233.79	68.4	1159.39	68.4	1403.98
68.5	2442.91	68.4	580.218	68.5	2181.27	68.5	1360.19	68.5	2196.33	68.6	1649.52	68.5	2234.1	68.5	1159.58	68.5	1404.18
68.6	2443.2	68.5	580.352	68.6	2181.53	68.6	1360.39	68.6	2196.66	68.7	1649.75	68.6	2234.44	68.6	1159.81	68.6	1404.38
68.7	2443.49	68.6	580.495	68.7	2181.83	68.7	1360.62	68.7	2197	68.8	1649.96	68.7	2234.74	68.7	1160.07	68.7	1404.58
68.8	2443.79	68.7	580.609	68.8	2182.13	68.8	1360.83	68.8	2197.33	68.9	1650.2	68.8	2235.06	68.8	1160.24	68.8	1404.79
68.9	2444.07	68.8	580.754	68.9	2182.43	68.9	1361.07	68.9	2197.6	69	1650.46	68.9	2235.38	68.9	1160.31	68.9	1405.09
69	2444.38	68.9	580.922	69	2182.71	69	1361.3	69	2197.89	69.1	1650.7	69	2235.67	69	1160.46	69	1405.33
69.1	2444.66	69	581.077	69.1	2183	69.1	1361.53	69.1	2198.18	69.2	1650.85	69.1	2235.95	69.1	1160.64	69.1	1405.55
69.2	2444.94	69.1	581.262	69.2	2183.3	69.2	1361.75	69.2	2198.46	69.3	1651.01	69.2	2236.25	69.2	1160.8	69.2	1405.82
69.3	2445.22	69.2	581.468	69.3	2183.57	69.3	1361.97	69.3	2198.77	69.4	1651.2	69.3	2236.55	69.3	1160.99	69.3	1406.06
69.4	2445.5	69.3	581.638	69.4	2183.9	69.4	1362.19	69.4	2199.05	69.5	1651.39	69.4	2236.84	69.4	1161.15	69.4	1406.3
69.5	2445.79	69.4	581.659	69.5	2184.17	69.5	1362.43	69.5	2199.31	69.6	1651.57	69.5	2237.14	69.5	1161.34	69.5	1406.56
69.6	2446.07	69.5	581.754	69.6	2184.47	69.6	1362.64	69.6	2199.59	69.7	1651.76	69.6	2237.46	69.6	1161.53	69.6	1406.78
69.7	2446.37	69.6	581.827	69.7	2184.79	69.7	1362.86	69.7	2199.92	69.8	1651.96	69.7	2237.73	69.7	1161.71	69.7	1406.98
69.8	2446.66	69.7	581.852	69.8	2185.1	69.8	1363.1	69.8	2200.25	69.9	1652.15	69.8	2238.02	69.8	1161.91	69.8	1407.18
69.9	2446.95	69.8	581.976	69.9	2185.41	69.9	1363.33	69.9	2200.58	70	1652.38	69.9	2238.31	69.9	1162.1	69.9	1407.38
70	2447.22	69.9	582.133	70	2185.72	70	1363.55	70	2200.9	70.1	1652.59	70	2238.61	70	1162.27	70	1407.62
70.1	2447.49	70	582.305	70.1	2186.05	70.1	1363.76	70.1	2201.23	70.2	1652.81	70.1	2238.88	70.1	1162.48	70.1	1407.82
70.2	2447.74	70.1	582.456	70.2	2186.37	70.2	1363.98	70.2	2201.54	70.3	1653.04	70.2	2239.16	70.2	1162.7	70.2	1408.05
70.3	2448.03	70.2	582.636	70.3	2186.68	70.3	1364.21	70.3	2201.87	70.4	1653.23	70.3	2239.46	70.3	1162.89	70.3	1408.25
70.4	2448.29	70.3	582.813	70.4	2186.99	70.4	1364.46	70.4	2202.16	70.5	1653.43	70.4	2239.76	70.4	1163.08	70.4	1408.45
70.5	2448.58	70.4	582.997	70.5	2187.3	70.5	1364.7	70.5	2202.49	70.6	1653.63	70.5	2240.07	70.5	1163.26	70.5	1408.66
70.6	2448.87	70.5	583.097	70.6	2187.63	70.6	1364.93	70.6	2202.82	70.7	1653.82	70.6	2240.38	70.6	1163.46	70.6	1408.85
70.7	2449.15	70.6	583.211	70.7	2187.92	70.7	1365.19	70.7	2203.13	70.8	1654.05	70.7	2240.63	70.7	1163.64	70.7	1409.08
70.8	2449.44	70.7	583.383	70.8	2188.2	70.8	1365.39	70.8	2203.43	70.9	1654.23	70.8	2240.88	70.8	1163.83	70.8	1409.29
70.9	2449.72	70.8	583.534	70.9	2188.49	70.9	1365.59	70.9	2203.75	71	1654.36	70.9	2241.14	70.9	1164.02	70.9	1409.55
71	2449.99	70.9	583.626	71	2188.78	71	1365.8	71	2204.05	71.1	1654.54	71	2241.41	71	1164.19	71	1409.78
71.1	2450.27	71	583.757	71.1	2189.05	71.1	1365.98	71.1	2204.35	71.2	1654.66	71.1	2241.68	71.1	1164.36	71.1	1409.98
71.2	2450.55	71.1	583.863	71.2	2189.31	71.2	1366.16	71.2	2204.68	71.3	1654.8	71.2	2241.96	71.2	1164.52	71.2	1410.22
71.3	2450.81	71.2	583.987	71.3	2189.57	71.3	1366.37	71.3	2204.98	71.4	1655.03	71.3	2242.21	71.3	1164.67	71.3	1410.45
71.4	2451.06	71.3	584.116	71.4	2189.86	71.4	1366.57	71.4	2205.31	71.5	1655.37	71.4	2242.46	71.4	1164.86	71.4	1410.69
71.5	2451.31	71.4	584.235	71.5	2190.13	71.5	1366.72	71.5	2205.65	71.6	1655.32	71.5	2242.72	71.5	1165.02	71.5	1410.92
71.6	2451.56	71.5	584.378	71.6	2190.38	71.6	1366.91	71.6	2205.98	71.7	1655.97	71.6	2242.99	71.6	1165.2	71.6	1411.17
71.7	2451.83	71.6	584.476	71.7	2190.61	71.7	1367.1	71.7	2206.3	71.8	1655.81	71.7	2243.27	71.7	1165.36	71.7	1411.43
71.8	2452.08	71.7	584.626	71.8	2190.89	71.8	1367.3	71.8	2206.63	71.9	1656.05	71.8	2243.54	71.8	1165.54	71.8	1411.69
71.9	2452.33	71.8	584.734	71.9	2191.17	71.9	1367.49	71.9	2206.77	72	1656.24	71.9	2243.81	71.9	1165.69	71.9	1411.89
72	2452.61	71.9	584.878	72	2191.43	72	1367.7	72	2207.01	72.1	1656.5	72	2244.06	72	1165.86	72	1412.04
72.1	2452.87	72	585.023	72.1	2191.69	72.1	1367.93	72.1	2207.33	72.2	1656.66	72.1	2244.32	72.1	1166	72.1	1412.23
72.2	2453.14	72.1	585.136	72.2	2191.97	72.2	1368.17	72.2	2207.63	72.3	1656.82	72.2	2244.6	72.2	1166.18	72.2	1412.43
72.3	2453.41	72.2	585.242	72.3	2192.24	72.3	1368.38	72.3	2207.94	72.4	1657.02	72.3	2244.89	72.3	1166.34	72.3	1412.65
72.4	2453.69	72.3	585.363	72.4	2192.52	72.4	1368.64	72.4	2208.24	72.5	1657.21	72.4	2245.18	72.4	1166.52	72.4	1412.86
72.5	2453.94	72.4	585.468	72.5	2192.82	72.5	1368.91	72.5	2208.52	72.6	1657.39	72.5	2245.45	72.5	1166.68	72.5	1413.05
72.6	2454.22	72.5	585.57	72.6	2193.11	72.6	1369.19	72.6	2208.84	72.7	1657.59	72.6	2245.7	72.6	1166.86	72.6	1413.26
72.7	2454.49	72.6	585.684	72.7	2193.39	72.7	1369.35	72.7	2209.14	72.8	1657.77	72.7	2245.95	72.7	1167.04	72.7	1413.46
72.8	2454.77	72.7	585.788	72.8	2193.69	72.8	1369.06	72.8	2209.42	72.9	1657.95	72.8	2246.22	72.8	1167.19	72.8	1413.69
72.9	2455.02	72.8	585.91	72.9	2193.97	72.9	1369.74	72.9	2209.71	73	1658.14	72.9	2246.49	72.9	1167.37	72.9	1413.92
73	2455.25	72.9	585.992	73	2194.28	73	1369.91	73	2210.01	73.1	1658.35	73	2246.77	73	1167.53	73	1414.14
73.1	2455.5	73	586.102	73.1	2194.55	73.1	1369.88	73.1	2210.32	73.2	1658.59	73.1	2247.05	73.1	1167.7	73.1	1414.37
73.2	2455.76	73.1	586.277	73.2	2194.78	73.2	1370.23	73.2	2210.61	73.3	1658.8	73.2	2247.34	73.2	1167.88	73.2	1414.6
73.3	2456.01	73.2	586.437	73.3	2195.02	73.3	1370.43	73.3	2210.93	73.4	1659.01	73.3	2247.64	73.3	1168.04	73.3	1414.85
73.4	2456.28	73.3	586.548	73.4	2195.28	73.4	1370.57	73.4	2211.21	73.5	1659.21	73.4	2247.91	73.4	1168.21	73.4	1415.09
73.5	2456.57	73.4	586.691	73.5	2195.52	73.5	1370.74	73.5	2211.5	73.6	1659.43	73.5	2248.18	73.5	1168.39	73.5	1415.29
73.6	2456.79	73.5	586.839	73.6	2195.79	73.6	1371.37	73.6	2211.8	73.7	1659.65	73.6	2248.49	73.6	1168.55	73.6	1415.5
73.7	2457.04	73.6	586.953	73.7	2196.04	73.7	1371.38	73.7	2212.07	73.8	1659.86	73.7	2248.8	73.7	1168.71	73.7	1415.7
73.8	2457.29	73.7	587.094	73.8	2196.29	73.8	1371.42	73.8	2212.35	73.9	1660.07	73.8	2249.08	73.8	1168.86	73.8	1415.91
73.9	2457.54	73.8	587.21	73.9	2196.54	73.9	1371.7	73.9	2212.64	74	1660.28	73.9	2249.33	73.9	1169.04	73.9	1416.09
74	2457.8	73.9	587.327	74	2196.8	74	1371.95	74	2212.92	74.1	1660.52	74	2249.63	74	1169.21	74	1416.26
74.1	2458.05	74	587.422	74.1	2197.07	74.1	1372.18	74.1	2213.17	74.2	1660.73	74.1	2249.89	74.1	1169.4	74.1	1416.4
74.2	2458.3	74.1	587.527	74.2	2197.37	74.2	1372.39	74.2	2213.44	74.3	1660.92	74.2	2250.11	74.2	1169.57	74.2	1416.54
74.3	2458.57	74.2	587.626	74.3	2197.66	74.3	1372.6	74.3	2213.7	74.4	1661.14	74.3	2250.37	74.3	1169.75	74.3	1416.81
74.4	2458.79	74.3	587.749	74.4	2197.93	74.4	1372.83	74.4	2213.98	74.5	1661.34	74.4	2250.61	74.4	1169.95	74.4	1417.11
74.5	2459.03	74.4	587.863	74.5	2198.18	74.5	1373.05	74.5	2214.25	74.6	1661.55	74.5	2250.87	74.5	1170.13	74.5	1417.33
74.6	2459.27	74.5	587.999	74.6	2198.46	74.6	1373.28	74.6	2214.52	74.7	1661.75	74.6	2251.13	74.6	1170.31	74.6	1417.55
74.7	2459.47	74.6	588.148	74.7	2198.72	74.7	1373.51	74.7	2214.78	74.8	1661.95	74.7	2251.37	74.7	1170.5	74.7	1417.81
74.8	2459.72	74.7	588.286	74.8	2198.98	74.8	1373.73	74.8	2215.04	74.9	1662.15	74.8	2251.63	74.8	1170.68	74.8	1418.01
74.9	2459.96	74.8	588.395	74.9	2199.25	74.9	1373.95	74.9	2215.3	75	1662.32	74.9	2251.9	74.9	1170.86	74.9	1418.18
75	2460.2	74.9	588.527	75	2199.52	75	1374.15	75	2215.57	75.1	1662.51	75	2252.15	75	1171.03	75	1418.4
75.1	2460.43	75	588.641	75.1	2199.78	75.1	1374.37	75.1	2215.84	75.2	1662.68	75.1	2252.39	75.1	1171.2	75.1	1418.61
75.2	2460.65	75.1	588.796	75.2	2200.02	75.2	1374.56	75.2	2216.11	75.3	1662.84	75.2	2252.67	75.2	1171.38	75.2	1418.78
75.3	2460.89	75.2	588.927	75.3	2200.26	75.3	1374.75	75.3	2216.41	75.4	1663.04	75.3	2252.9	75.3	1171.54	75.3	1418.98
75.4	2461.11	75.3	589.058	75.4	2200.47	75.4	1374.98	75.4	2216.71	75.5	1663.19	75.4	2253.13	75.4	1171.71	75.4	1419.15
75.5	2461.33	75.4	589.203	75.5	2200.69	75.5	1375.17	75.5	2216.98	75.6	1663.35	75.5	2253.38	75.5	1171.87	75.5	1419.32
75.6	2461.6	75.5	589.339	75.6	2200.93	75.6	1375.38	75.6	2217.29	75.7	1663.52	75.6	2253.62	75.6	1172.04	75.6	1419.48
75.7	2461.82	75.6	589.437	75.7	2201.14	75.7	1375.59	75.7	2217.56	75.8	1663.71	75.7	2253.9	75.7	1172.23	75.7	1419.68
75.8	2462.08	75.7	589.536	75.8	2201.42	75.8	1375.76	75.8	2217.84	75.9	1663.89	75.8	2254.13	75.8	1172.4	75.8	1419.86
75.9	2462.3	75.8	589.652	75.9	2201.67	75.9	1375.96	75.9	2218.14	76	1664.02	75.9	2254.34	75.9	1172.59	75.9	1420.07
76	2462.54	75.9	589.773	76	2201.92	76	1376.15	76	2218.4	76.1	1664.21	76	2254.56	76	1172.77	76	1420.24
76.1	2462.75	76	589.898	76.1	2202.16	76.1	1376.35	76.1	2218.69	76.2	1664.38	76.1	2254.8	76.1	1172.94	76.1	1420.41
76.2	2462.99	76.1	590.012	76.2	2202.4	76.2	1376.56	76.2	2219	76.3	1664.57	76.2	2255.04	76.2	1173.15	76.2	1420.57
76.3	2463.23	76.2	590.105	76.3	2202.67	76.3	1376.77	76.3	2219.28	76.4	1664.78	76.3	2255.28	76.3	1173.32	76.3	1420.76
76.4	2463.46	76.3	590.179	76.4	2202.92	76.4	1376.97	76.4	2219.52	76.5	1664.95	76.4	2255.54	76.4	1173.5	76.4	1420.97
76.5	2463.7	76.4	590.293	76.5	2203.18	76.5	1377.13	76.5	2219.77	76.6	1665.15	76.5	2255.79	76.5	1173.69	76.5	1421.16
76.6	2463.92	76.5	590.414	76.6	2203.48	76.6	1377.33	76.6	2220.03	76.7	1665.34	76.6	2256.04	76.6	1173.87	76.6	1421.35
76.7	2464.18	76.6	590.53	76.7	2203.77	76.7	1377.52	76.7	2220.28	76.8	1665.53	76.7	2256.26	76.7	1174.06	76.7	1421.55
76.8	2464.43	76.7	590.655	76.8	2204.05	76.8	1377.7	76.8	2220.54	76.9	1665.7	76.8	2256.52	76.8	1174.24	76.8	1421.76
76.9	2464.66	76.8	590.766	76.9	2204.3	76.9	1377.92	76.9	2220.77	77	1665.91	76.9	2256.77	76.9	1174.41	76.9	1421.95
77	2464.92	76.9	590.87	77	2204.56	77	1378.14	77	2221.02	77.1	1666.07	77	2257.04	77	1174.56	77	1422.15
77.1	2465.14	77	590.968	77.1	2204.77	77.1	1378.36	77.1	2221.29	77.2	1666.21	77.1	2257.31	77.1	1174.71	77.1	1422.35
77.2	2465.36	77.1	591.09	77.2	2204.98	77.2	1378.55	77.2	2221.55	77.3	1666.36	77.2	2257.57	77.2	1174.86	77.2	1422.54
77.3	2465.61	77.2	591.195	77.3	2205.22	77.3	1378.74	77.3	2221.78	77.4	1666.51	77.3	2257.85	77.3	1175	77.3	1422.74
77.4	2465.88	77.3	591.305	77.4	2205.47	77.4	1378.94	77.4	2222.03	77.5	1666.68	77.4	2258.12	77.4	1175.14	77.4	1422.9
77.5	2466.12	77.4	591.409	77.5	2205.7	77.5	1379.14	77.5	2222.3	77.6	1666.84	77.5	2258.36	77.5	1175.3	77.5	1423.07
77.6	2466.37	77.5	591.531	77.6	2205.94	77.6	1379.35	77.6	2222.56	77.7	1667.02	77.6	2258.61	77.6	1175.45	77.6	1423.26
77.7	2466.61	77.6	591.602	77.7	2206.16	77.7	1379.53	77.7	2222.82	77.8	1667.18	77.7	2258.84	77.7	1175.59	77.7	1423.42
77.8	2466.86	77.7	591.718	77.8	2206.42	77.8	1379.74	77.8	2223.08	77.9	1667.35	77.8	2259.08	77.8	1175.74	77.8	1423.61
77.9	2467.09	77.8	591.891	77.9	2206.69	77.9	1379.95	77.9	2223.34	78	1667.57	77.9	2259.3	77.9	1175.88	77.9	1423.78
78	2467.34	77.9	592.027	78	2206.93	78	1380.13	78	2223.61	78.1	1667.77	78	2259.51	78	1176.01	78	1423.97
78.1	2467.59	78	592.191	78.1	2207.19	78.1	1380.32	78.1	2223.86	78.2	1667.95	78.1	2259.75	78.1	1176.15	78.1	1424.16
78.2	2467.83	78.1	592.324	78.2	2207.44	78.2	1380.54	78.2	2224.1	78.3	1668.16	78.2	2259.96	78.2	1176.32	78.2	1424.37
78.3	2468.1	78.2	592.473	78.3	2207.68	78.3	1380.74	78.3	2224.33	78.4	1668.34	78.3	2260.19	78.3	1176.48	78.3	1424.54
78.4	2468.29	78.3	592.612	78.4	2207.92	78.4	1380.95	78.4	2224.58	78.5	1668.55	78.4	2260.43	78.4	1176.63	78.4	1424.73
78.5	2468.52	78.4	592.747	78.5	2208.17	78.5	1381.16	78.5	2224.84	78.6	1668.73	78.5	2260.65	78.5	1176.8	78.5	1424.9
78.6	2468.74	78.5	592.866	78.6	2208.41	78.6	1381.35	78.6	2225.09	78.7	1668.87	78.6	2260.88	78.6	1176.95	78.6	1425.09
78.7	2468.99	78.6	592.98	78.7	2208.64	78.7	1381.57	78.7	2225.32	78.8	1668.99	78.7	2261.13	78.7	1177.08	78.7	1425.29
78.8	2469.21	78.7	593.145	78.8	2208.86	78.8	1381.79	78.8	2225.55	78.9	1669.16	78.8	2261.4	78.8	1177.24	78.8	1425.48
78.9	2469.46	78.8	593.211	78.9	2209.09	78.9	1382.04	78.9	2225.77	79	1669.28	78.9	2261.65	78.9	1177.4	78.9	1425.67
79	2469.7	78.9	593.32	79	2209.3	79	1382.22	79	2226	79.1	1669.46	79	2261.88	79	1177.56	79	1425.85
79.1	2469.93	79	593.422	79.1	2209.53	79.1	1382.39	79.1	2226.26	79.2	1669.62	79.1	2262.15	79.1	1177.74	79.1	1426.02
79.2	2470.17	79.1	593.527	79.2	2209.76	79.2	1382.59	79.2	2226.5	79.3	1669.75	79.2	2262.39	79.2	1177.9	79.2	1426.23
79.3	2470.42	79.2	593.609	79.3	2209.96	79.3	1382.76	79.3	2226.76	79.4	1669.93	79.3	2262.65	79.3	1178.04	79.3	1426.41
79.4	2470.63	79.3	593.73	79.4	2210.19	79.4	1382.96	79.4	2227.04	79.5	1670.07	79.4	2262.89	79.4	1178.2	79.4	1426.58
79.5	2470.87	79.4	593.866	79.5	2210.42	79.5	1383.15	79.5	2227.29	79.6	1670.19	79.5	2263.13	79.5	1178.37	79.5	1426.78
79.6	2471.08	79.5	594	79.6	2210.64	79.6	1383.34	79.6	2227.54	79.7	1670.43	79.6	2263.35	79.6	1178.5	79.6	1426.98
79.7	2471.28	79.6	594.102	79.7	2210.87	79.7	1383.52	79.7	2227.78	79.8	1670.68	79.7	2263.59	79.7	1178.66	79.7	1427.14
79.8	2471.48	79.7	594.237	79.8	2211.1	79.8	1383.7	79.8	2228.02	79.9	1670.85	79.8	2263.82	79.8	1178.82	79.8	1427.32
79.9	2471.68	79.8	594.376	79.9	2211.32	79.9	1383.87	79.9	2228.29	80	1671.04	79.9	2264.05	79.9	1179	79.9	1427.52
80	2471.89	79.9	594.507	80	2211.54	80	1384.04	80	2228.55	80.1	1671.26	80	2264.29	80	1179.15	80	1427.69
80.1	2472.11	80	594.628	80.1	2211.77	80.1	1384.23	80.1	2228.81	80.2	1671.45	80.1	2264.49	80.1	1179.3	80.1	1427.88
80.2	2472.34	80.1	594.75	80.2	2211.98	80.2	1384.44	80.2	2229.1	80.3	1671.57	80.2	2264.72	80.2	1179.43	80.2	1428.05
80.3	2472.56	80.2	594.859	80.3	2212.2	80.3	1384.66	80.3	2229.34	80.4	1671.73	80.3	2264.93	80.3	1179.6	80.3	1428.21
80.4	2472.78	80.3	594.992	80.4	2212.42	80.4	1384.85	80.4	2229.6	80.5	1671.88	80.4	2265.15	80.4	1179.79	80.4	1428.35
80.5	2472.98	80.4	595.109	80.5	2212.65	80.5	1385.07	80.5	2229.83	80.6	1672.05	80.5	2265.39	80.5	1179.95	80.5	1428.54
80.6	2473.16	80.5	595.191	80.6	2212.88	80.6	1385.27	80.6	2230.07	80.7	1672.22	80.6	2265.63	80.6	1180.09	80.6	1428.75
80.7	2473.38	80.6	595.308	80.7	2213.09	80.7	1385.46	80.7	2230.3	80.8	1672.33	80.7	2265.86	80.7	1180.26	80.7	1428.93
80.8	2473.63	80.7	595.407	80.8	2213.31	80.8	1385.64	80.8	2230.56	80.9	1672.63	80.8	2266.11	80.8	1180.44	80.8	1429.08
80.9	2473.88	80.8	595.523	80.9	2213.54	80.9	1385.83	80.9	2230.81	81	1672.75	80.9	2266.37	80.9	1180.63	80.9	1429.22
81	2474.12	80.9	595.625	81	2213.75	81	1386.04	81	2231.07	81.1	1672.94	81	2266.59	81	1180.79	81	1429.41
81.1	2474.35	81	595.737	81.1	2213.98	81.1	1386.24	81.1	2231.31	81.2	1673.04	81.1	2266.8	81.1	1180.96	81.1	1429.56
81.2	2474.63	81.1	595.878	81.2	2214.22	81.2	1386.41	81.2	2231.55	81.3	1673.21	81.2	2267.03	81.2	1181.12	81.2	1429.71
81.3	2474.69	81.2	596	81.3	2214.45	81.3	1386.61	81.3	2231.78	81.4	1673.4	81.3	2267.29	81.3	1181.28	81.3	1429.88
81.4	2474.88	81.3	596.128	81.4	2214.67	81.4	1386.82	81.4	2232.02	81.5	1673.58	81.4	2267.54	81.4	1181.44	81.4	1430.07
81.5	2475.08	81.4	596.216	81.5	2214.89	81.5	1387.01	81.5	2232.26	81.6	1673.77	81.5	2267.75	81.5	1181.57	81.5	1430.29
81.6	2475.28	81.5	596.383	81.6	2215.1	81.6	1387.21	81.6	2232.51	81.7	1673.94	81.6	2267.95	81.6	1181.71	81.6	1430.5
81.7	2475.53	81.6	596.519	81.7	2215.35	81.7	1387.39	81.7	2232.76	81.8	1674.12	81.7	2268.16	81.7	1181.83	81.7	1430.66
81.8	2475.79	81.7	596.636	81.8	2215.59	81.8	1387.61	81.8	2233	81.9	1674.24	81.8	2268.4	81.8	1181.96	81.8	1430.79
81.9	2476.02	81.8	596.77	81.9	2215.84	81.9	1387.83	81.9	2233.22	82	1674.36	81.9	2268.59	81.9	1182.1	81.9	1430.93
82	2476.24	81.9	596.907	82	2216.06	82	1388.04	82	2233.46	82.1	1674.53	82	2268.83	82	1182.21	82	1431.09
82.1	2476.46	82	597.041	82.1	2216.29	82.1	1388.22	82.1	2233.7	82.2	1674.68	82.1	2269.05	82.1	1182.35	82.1	1431.24
82.2	2476.68	82.1	597.138	82.2	2216.52	82.2	1388.36	82.2	2233.93	82.3	1674.8	82.2	2269.28	82.2	1182.48	82.2	1431.41
82.3	2476.91	82.2	597.242	82.3	2216.71	82.3	1388.52	82.3	2234.16	82.4	1674.94	82.3	2269.5	82.3	1182.63	82.3	1431.57
82.4	2477.12	82.3	597.339	82.4	2216.93	82.4	1388.69	82.4	2234.37	82.5	1675.15	82.4	2269.72	82.4	1182.78	82.4	1431.73
82.5	2477.32	82.4	597.461	82.5	2217.16	82.5	1388.86	82.5	2234.6	82.6	1675.33	82.5	2269.95	82.5	1182.95	82.5	1431.87
82.6	2477.54	82.5	597.563	82.6	2217.37	82.6	1389.05	82.6	2234.82	82.7	1675.48	82.6	2270.14	82.6	1183.09	82.6	1432.04
82.7	2477.73	82.6	597.684	82.7	2217.59	82.7	1389.21	82.7	2235.03	82.8	1675.65	82.7	2270.36	82.7	1183.26	82.7	1432.19
82.8	2477.93	82.7	597.788	82.8	2217.79	82.8	1389.39	82.8	2235.26	82.9	1675.81	82.8	2270.57	82.8	1183.4	82.8	1432.38
82.9	2478.12	82.8	597.895	82.9	2218.02	82.9	1389.55	82.9	2235.5	83	1676	82.9	2270.81	82.9	1183.55	82.9	1432.53
83	2478.31	82.9	598.012	83	2218.23	83	1389.74	83	2235.73	83.1	1676.2	83	2271.05	83	1183.71	83	1432.69
83.1	2478.53	83	598.113	83.1	2218.46	83.1	1389.95	83.1	2235.95	83.2	1676.36	83.1	2271.26	83.1	1183.86	83.1	1432.86
83.2	2478.74	83.1	598.233	83.2	2218.68	83.2	1390.13	83.2	2236.16	83.3	1676.51	83.2	2271.49	83.2	1184	83.2	1433
83.3	2478.94	83.2	598.34	83.3	2218.92	83.3	1390.3	83.3	2236.39	83.4	1676.66	83.3	2271.72	83.3	1184.15	83.3	1433.18
83.4	2479.16	83.3	598.449	83.4	2219.15	83.4	1390.48	83.4	2236.63	83.5	1676.84	83.4	2271.91	83.4	1184.27	83.4	1433.36
83.5	2479.36	83.4	598.563	83.5	2219.36	83.5	1390.69	83.5	2236.84	83.6	1677	83.5	2272.07	83.5	1184.42	83.5	1433.51
83.6	2479.54	83.5	598.667	83.6	2219.56	83.6	1390.87	83.6	2237.05	83.7	1677.2	83.6	2272.28	83.6	1184.55	83.6	1433.68
83.7	2479.73	83.6	598.781	83.7	2219.77	83.7	1391.05	83.7	2237.28	83.8	1677.37	83.7	2272.49	83.7	1184.72	83.7	1433.86
83.8	2479.94	83.7	598.902	83.8	2219.94	83.8	1391.21	83.8	2237.48	83.9	1677.55	83.8	2272.71	83.8	1184.85	83.8	1434.05
83.9	2480.14	83.8	599.019	83.9	2220.19	83.9	1391.37	83.9	2237.69	84	1677.75	83.9	2272.92	83.9	1184.97	83.9	1434.23
84	2480.37	83.9	599.118	84	2220.44	84	1391.52	84	2237.92	84.1	1677.92	84	2273.13	84	1185.11	84	1434.41
84.1	2480.58	84	599.223	84.1	2220.66	84.1	1391.71	84.1	2238.14	84.2	1678.08	84.1	2273.34	84.1	1185.25	84.1	1434.58
84.2	2480.78	84.1	599.342	84.2	2220.87	84.2	1391.89	84.2	2238.38	84.3	1678.24	84.2	2273.52	84.2	1185.4	84.2	1434.75
84.3	2480.98	84.2	599.469	84.3	2221.1	84.3	1392.08	84.3	2238.57	84.4	1678.43	84.3	2273.73	84.3	1185.55	84.3	1434.94
84.4	2481.2	84.3	599.59	84.4	2221.33	84.4	1392.24	84.4	2238.77	84.5	1678.59	84.4	2273.96	84.4	1185.71	84.4	1435.09
84.5	2481.39	84.4	599.711	84.5	2221.56	84.5	1392.41	84.5	2238.99	84.6	1678.74	84.5	2274.2	84.5	1185.86	84.5	1435.25
84.6	2481.61	84.5	599.84	84.6	2221.74	84.6	1392.57	84.6	2239.22	84.7	1678.89	84.6	2274.47	84.6	1186	84.6	1435.44
84.7	2481.83	84.6	599.961	84.7	2221.93	84.7	1392.74	84.7	2239.44	84.8	1679.04	84.7	2274.73	84.7	1186.15	84.7	1435.59
84.8	2482.05	84.7	600.082	84.8	2222.11	84.8	1392.91	84.8	2239.67	84.9	1679.18	84.8	2274.93	84.8	1186.29	84.8	1435.77
84.9	2482.27	84.8	600.187	84.9	2222.29	84.9	1393.06	84.9	2239.9	85	1679.34	84.9	2275.16	84.9	1186.42	84.9	1435.95
85	2482.5	84.9	600.308	85	2222.52	85	1393.23	85	2240.13	85.1	1679.47	85	2275.37	85	1186.58	85	1436.12
85.1	2482.72	85	600.43	85.1	2222.74	85.1	1393.43	85.1	2240.32	85.2	1679.63	85.1	2275.61	85.1	1186.71	85.1	1436.27
85.2	2482.93	85.1	600.531	85.2	2222.96	85.2	1393.61	85.2	2240.53	85.3	1679.76	85.2	2275.84	85.2	1186.88	85.2	1436.42
85.3	2483.18	85.2	600.648	85.3	2223.14	85.3	1393.77	85.3	2240.78	85.4	1679.89	85.3	2276.06	85.3	1187.04	85.3	1436.57
85.4	2483.41	85.3	600.735	85.4	2223.32	85.4	1393.94	85.4	2241	85.5	1680.03	85.4	2276.29	85.4	1187.19	85.4	1436.72
85.5	2483.6	85.4	600.871	85.5	2223.55	85.5	1394.13	85.5	2241.18	85.6	1680.18	85.5	2276.46	85.5	1187.37	85.5	1436.88
85.6	2483.82	85.5	600.991	85.6	2223.76	85.6	1394.29	85.6	2241.41	85.7	1680.33	85.6	2276.65	85.6	1187.52	85.6	1437.02
85.7	2484.05	85.6	601.106	85.7	2223.99	85.7	1394.46	85.7	2241.63	85.8	1680.49	85.7	2276.85	85.7	1187.69	85.7	1437.15
85.8	2484.27	85.7	601.234	85.8	2224.21	85.8	1394.62	85.8	2241.84	85.9	1680.63	85.8	2277.05	85.8	1187.84	85.8	1437.33
85.9	2484.48	85.8	601.352	85.9	2224.45	85.9	1394.76	85.9	2242.07	86	1680.79	85.9	2277.27	85.9	1187.99	85.9	1437.48
86	2484.66	85.9	601.468	86	2224.68	86	1394.91	86	2242.28	86.1	1680.94	86	2277.45	86	1188.15	86	1437.64
86.1	2484.85	86	601.577	86.1	2224.84	86.1	1395.06	86.1	2242.49	86.2	1681.1	86.1	2277.63	86.1	1188.31	86.1	1437.8
86.2	2485.03	86.1	601.696	86.2	2225.02	86.2	1395.21	86.2	2242.73	86.3	1681.27	86.2	2277.83	86.2	1188.45	86.2	1437.98
86.3	2485.24	86.2	601.83	86.3	2225.2	86.3	1395.34	86.3	2242.95	86.4	1681.45	86.3	2278.02	86.3	1188.59	86.3	1438.14
86.4	2485.4	86.3	601.958	86.4	2225.38	86.4	1395.51	86.4	2243.19	86.5	1681.61	86.4	2278.23	86.4	1188.73	86.4	1438.3
86.5	2485.61	86.4	602.085	86.5	2225.57	86.5	1395.65	86.5	2243.42	86.6	1681.75	86.5	2278.42	86.5	1188.88	86.5	1438.48
86.6	2485.81	86.5	602.187	86.6	2225.77	86.6	1395.82	86.6	2243.63	86.7	1681.92	86.6	2278.63	86.6	1189.04	86.6	1438.63
86.7	2485.98	86.6	602.309	86.7	2225.97	86.7	1395.99	86.7	2243.81	86.8	1682.07	86.7	2278.79	86.7	1189.18	86.7	1438.79
86.8	2486.17	86.7	602.407	86.8	2226.14	86.8	1396.21	86.8	2244.02	86.9	1682.22	86.8	2278.97	86.8	1189.33	86.8	1438.96
86.9	2486.39	86.8	602.484	86.9	2226.33	86.9	1396.4	86.9	2244.22	87	1682.38	86.9	2279.18	86.9	1189.47	86.9	1439.13
87	2486.57	86.9	602.561	87	2226.52	87	1396.61	87	2244.42	87.1	1682.52	87	2279.37	87	1189.63	87	1439.28
87.1	2486.79	87	602.66	87.1	2226.7	87.1	1396.79	87.1	2244.64	87.2	1682.7	87.1	2279.61	87.1	1189.77	87.1	1439.43
87.2	2486.98	87.1	602.781	87.2	2226.88	87.2	1396.96	87.2	2244.85	87.3	1682.86	87.2	2279.82	87.2	1189.9	87.2	1439.57
87.3	2487.2	87.2	602.859	87.3	2227.08	87.3	1397.17	87.3	2245.05	87.4	1683.02	87.3	2280.02	87.3	1190.02	87.3	1439.72
87.4	2487.44	87.3	602.941	87.4	2227.33	87.4	1397.33	87.4	2245.25	87.5	1683.14	87.4	2280.22	87.4	1190.15	87.4	1439.9
87.5	2487.64	87.4	603.027	87.5	2227.57	87.5	1397.51	87.5	2245.48	87.6	1683.29	87.5	2280.41	87.5	1190.28	87.5	1440
87.6	2487.86	87.5	603.121	87.6	2227.78	87.6	1397.6	87.6	2245.67	87.7	1683.46	87.6	2280.65	87.6	1190.43	87.6	1440.16
87.7	2488.05	87.6	603.237	87.7	2227.98	87.7	1397.77	87.7	2245.87	87.8	1683.61	87.7	2280.88	87.7	1190.56	87.7	1440.32
87.8	2488.27	87.7	603.34	87.8	2228.21	87.8	1397.96	87.8	2246.07	87.9	1683.76	87.8	2281.1	87.8	1190.69	87.8	1440.5
87.9	2488.47	87.8	603.454	87.9	2228.44	87.9	1398.14	87.9	2246.29	88	1683.92	87.9	2281.33	87.9	1190.81	87.9	1440.65
88	2488.68	87.9	603.558	88	2228.66	88	1398.32	88	2246.51	88.1	1684.06	88	2281.55	88	1190.92	88	1440.81
88.1	2488.89	88	603.667	88.1	2228.84	88.1	1398.5	88.1	2246.73	88.2	1684.23	88.1	2281.76	88.1	1191.05	88.1	1440.98
88.2	2489.08	88.1	603.75	88.2	2229.02	88.2	1398.7	88.2	2246.93	88.3	1684.39	88.2	2281.97	88.2	1191.16	88.2	1441.12
88.3	2489.28	88.2	603.832	88.3	2229.21	88.3	1398.9	88.3	2247.15	88.4	1684.54	88.3	2282.2	88.3	1191.29	88.3	1441.26
88.4	2489.47	88.3	603.941	88.4	2229.35	88.4	1399.1	88.4	2247.36	88.5	1684.7	88.4	2282.42	88.4	1191.44	88.4	1441.44
88.5	2489.66	88.4	604.023	88.5	2229.53	88.5	1399.29	88.5	2247.58	88.6	1684.88	88.5	2282.63	88.5	1191.58	88.5	1441.59
88.6	2489.86	88.5	604.133	88.6	2229.71	88.6	1399.48	88.6	2247.79	88.7	1685.02	88.6	2282.85	88.6	1191.74	88.6	1441.75
88.7	2490.04	88.6	604.223	88.7	2229.9	88.7	1399.68	88.7	2248.01	88.8	1685.16	88.7	2283.07	88.7	1191.88	88.7	1441.91
88.8	2490.23	88.7	604.323	88.8	2230.08	88.8	1399.85	88.8	2248.22	88.9	1685.31	88.8	2283.26	88.8	1192.04	88.8	1442.04
88.9	2490.42	88.8	604.415	88.9	2230.28	88.9	1400	88.9	2248.47	89	1685.46	88.9	2283.46	88.9	1192.17	88.9	1442.18
89	2490.59	88.9	604.527	89	2230.47	89	1400.18	89	2248.69	89.1	1685.62	89	2283.63	89	1192.31	89	1442.31
89.1	2490.78	89	604.641	89.1	2230.66	89.1	1400.35	89.1	2248.9	89.2	1685.76	89.1	2283.82	89.1	1192.45	89.1	1442.45
89.2	2490.95	89.1	604.737	89.2	2230.85	89.2	1400.5	89.2	2249.1	89.3	1685.91	89.2	2284.03	89.2	1192.62	89.2	1442.6
89.3	2491.13	89.2	604.84	89.3	2231.05	89.3	1400.64	89.3	2249.31	89.4	1686.04	89.3	2284.23	89.3	1192.75	89.3	1442.77
89.4	2491.32	89.3	604.949	89.4	2231.25	89.4	1400.8	89.4	2249.48	89.5	1686.2	89.4	2284.4	89.4	1192.87	89.4	1442.9
89.5	2491.5	89.4	605.059	89.5	2231.44	89.5	1400.96	89.5	2249.65	89.6	1686.33	89.5	2284.59	89.5	1193.02	89.5	1443.03
89.6	2491.66	89.5	605.175	89.6	2231.64	89.6	1401.11	89.6	2249.85	89.7	1686.44	89.6	2284.78	89.6	1193.16	89.6	1443.18
89.7	2491.82	89.6	605.262	89.7	2231.83	89.7	1401.26	89.7	2250.05	89.8	1686.6	89.7	2284.95	89.7	1193.28	89.7	1443.31
89.8	2492	89.7	605.363	89.8	2232.03	89.8	1401.4	89.8	2250.22	89.9	1686.72	89.8	2285.14	89.8	1193.42	89.8	1443.45
89.9	2492.17	89.8	605.484	89.9	2232.23	89.9	1401.57	89.9	2250.4	90	1686.88	89.9	2285.31	89.9	1193.59	89.9	1443.59
90	2492.36	89.9	605.577	90	2232.42	90	1401.76	90	2250.57	90.1	1687.03	90	2285.5	90	1193.73	90	1443.74
90.1	2492.53	90	605.672	90.1	2232.63	90.1	1401.91	90.1	2250.75	90.2	1687.18	90.1	2285.67	90.1	1193.88	90.1	1443.86
90.2	2492.72	90.1	605.773	90.2	2232.84	90.2	1402.09	90.2	2250.95	90.3	1687.34	90.2	2285.85	90.2	1194.03	90.2	1443.98
90.3	2492.91	90.2	605.878	90.3	2233.06	90.3	1402.27	90.3	2251.15	90.4	1687.47	90.3	2286.02	90.3	1194.17	90.3	1444.11
90.4	2493.11	90.3	605.968	90.4	2233.26	90.4	1402.42	90.4	2251.36	90.5	1687.63	90.4	2286.2	90.4	1194.34	90.4	1444.26
90.5	2493.28	90.4	606.051	90.5	2233.44	90.5	1402.64	90.5	2251.55	90.6	1687.78	90.5	2286.37	90.5	1194.49	90.5	1444.42
90.6	2493.45	90.5	606.152	90.6	2233.62	90.6	1402.74	90.6	2251.75	90.7	1687.88	90.6	2286.54	90.6	1194.63	90.6	1444.57
90.7	2493.63	90.6	606.242	90.7	2233.77	90.7	1402.85	90.7	2251.97	90.8	1688.02	90.7	2286.74	90.7	1194.77	90.7	1444.7
90.8	2493.82	90.7	606.371	90.8	2233.94	90.8	1402.95	90.8	2252.17	90.9	1688.11	90.8	2286.92	90.8	1194.87	90.8	1444.87
90.9	2494	90.8	606.48	90.9	2234.11	90.9	1403.08	90.9	2252.37	91	1688.2	90.9	2287.08	90.9	1195.02	90.9	1445.04
91	2494.18	90.9	606.563	91	2234.27	91	1403.27	91	2252.58	91.1	1688.4	91	2287.28	91	1195.17	91	1445.16
91.1	2494.37	91	606.662	91.1	2234.45	91.1	1403.39	91.1	2252.75	91.2	1688.55	91.1	2287.47	91.1	1195.31	91.1	1445.33
91.2	2494.58	91.1	606.766	91.2	2234.6	91.2	1403.62	91.2	2252.93	91.3	1688.7	91.2	2287.66	91.2	1195.44	91.2	1445.52
91.3	2494.74	91.2	606.852	91.3	2234.75	91.3	1403.88	91.3	2253.1	91.4	1688.85	91.3	2287.84	91.3	1195.57	91.3	1445.65
91.4	2494.92	91.3	606.976	91.4	2234.91	91.4	1404.05	91.4	2253.29	91.5	1689	91.4	2288.04	91.4	1195.7	91.4	1445.8
91.5	2495.11	91.4	607.09	91.5	2235.08	91.5	1404.2	91.5	2253.46	91.6	1689.15	91.5	2288.23	91.5	1195.84	91.5	1445.92
91.6	2495.3	91.5	607.223	91.6	2235.24	91.6	1404.41	91.6	2253.64	91.7	1689.29	91.6	2288.43	91.6	1195.98	91.6	1446.09
91.7	2495.49	91.6	607.355	91.7	2235.43	91.7	1404.58	91.7	2253.81	91.8	1689.44	91.7	2288.63	91.7	1196.12	91.7	1446.22
91.8	2495.69	91.7	607.505	91.8	2235.6	91.8	1404.75	91.8	2254.01	91.9	1689.57	91.8	2288.83	91.8	1196.26	91.8	1446.37
91.9	2495.86	91.8	607.621	91.9	2235.78	91.9	1404.91	91.9	2254.21	92	1689.72	91.9	2289	91.9	1196.42	91.9	1446.54
92	2496.05	91.9	607.765	92	2235.97	92	1405.09	92	2254.39	92.1	1689.84	92	2289.22	92	1196.58	92	1446.68
92.1	2496.24	92	607.888	92.1	2236.16	92.1	1405.25	92.1	2254.55	92.2	1690	92.1	2289.41	92.1	1196.69	92.1	1446.84
92.2	2496.42	92.1	608.007	92.2	2236.36	92.2	1405.43	92.2	2254.72	92.3	1690.13	92.2	2289.58	92.2	1196.83	92.2	1447.04
92.3	2496.6	92.2	608.172	92.3	2236.57	92.3	1405.62	92.3	2254.88	92.4	1690.26	92.3	2289.77	92.3	1196.93	92.3	1447.15
92.4	2496.79	92.3	608.281	92.4	2236.77	92.4	1405.79	92.4	2255.05	92.5	1690.44	92.4	2289.96	92.4	1197.07	92.4	1447.27
92.5	2496.97	92.4	608.402	92.5	2236.96	92.5	1405.98	92.5	2255.22	92.6	1690.6	92.5	2290.14	92.5	1197.18	92.5	1447.39
92.6	2497.14	92.5	608.546	92.6	2237.14	92.6	1406.14	92.6	2255.39	92.7	1690.74	92.6	2290.32	92.6	1197.29	92.6	1447.51
92.7	2497.33	92.6	608.655	92.7	2237.32	92.7	1406.35	92.7	2255.59	92.8	1690.88	92.7	2290.53	92.7	1197.41	92.7	1447.64
92.8	2497.51	92.7	608.747	92.8	2237.51	92.8	1406.55	92.8	2255.8	92.9	1691.04	92.8	2290.72	92.8	1197.53	92.8	1447.75
92.9	2497.68	92.8	608.832	92.9	2237.7	92.9	1406.73	92.9	2255.99	93	1691.2	92.9	2290.91	92.9	1197.63	92.9	1447.88
93	2497.87	92.9	608.934	93	2237.9	93	1406.91	93	2256.19	93.1	1691.36	93	2291.14	93	1197.72	93	1447.98
93.1	2498.05	93	609.022	93.1	2238.08	93.1	1407.1	93.1	2256.36	93.2	1691.53	93.1	2291.32	93.1	1197.81	93.1	1448.13
93.2	2498.26	93.1	609.106	93.2	2238.29	93.2	1407.28	93.2	2256.54	93.3	1691.68	93.2	2291.54	93.2	1197.91	93.2	1448.25
93.3	2498.44	93.2	609.218	93.3	2238.45	93.3	1407.45	93.3	2256.75	93.4	1691.85	93.3	2291.73	93.3	1198.01	93.3	1448.4
93.4	2498.6	93.3	609.313	93.4	2238.63	93.4	1407.6	93.4	2256.95	93.5	1691.99	93.4	2291.92	93.4	1198.13	93.4	1448.52
93.5	2498.79	93.4	609.402	93.5	2238.79	93.5	1407.78	93.5	2257.17	93.6	1692.11	93.5	2292.1	93.5	1198.23	93.5	1448.66
93.6	2498.96	93.5	609.512	93.6	2238.96	93.6	1407.95	93.6	2257.37	93.7	1692.25	93.6	2292.29	93.6	1198.37	93.6	1448.77
93.7	2499.14	93.6	609.594	93.7	2239.13	93.7	1408.1	93.7	2257.61	93.8	1692.41	93.7	2292.47	93.7	1198.5	93.7	1448.91
93.8	2499.3	93.7	609.706	93.8	2239.28	93.8	1408.25	93.8	2257.81	93.9	1692.55	93.8	2292.68	93.8	1198.61	93.8	1449.05
93.9	2499.47	93.8	609.813	93.9	2239.44	93.9	1408.4	93.9	2257.99	94	1692.69	93.9	2292.85	93.9	1198.73	93.9	1449.18
94	2499.68	93.9	609.922	94	2239.61	94	1408.56	94	2258.15	94.1	1692.82	94	2293.03	94	1198.89	94	1449.32
94.1	2499.87	94	609.995	94.1	2239.79	94.1	1408.73	94.1	2258.33	94.2	1692.94	94.1	2293.19	94.1	1199.01	94.1	1449.42
94.2	2500.01	94.1	610.121	94.2	2239.96	94.2	1408.9	94.2	2258.51	94.3	1693.08	94.2	2293.38	94.2	1199.15	94.2	1449.57
94.3	2500.16	94.2	610.25	94.3	2240.13	94.3	1409.07	94.3	2258.68	94.4	1693.21	94.3	2293.54	94.3	1199.29	94.3	1449.79
94.4	2500.35	94.3	610.34	94.4	2240.31	94.4	1409.23	94.4	2258.86	94.5	1693.35	94.4	2293.71	94.4	1199.41	94.4	1449.89
94.5	2500.54	94.4	610.434	94.5	2240.51	94.5	1409.39	94.5	2259.03	94.6	1693.49	94.5	2293.88	94.5	1199.53	94.5	1450.02
94.6	2500.71	94.5	610.551	94.6	2240.69	94.6	1409.53	94.6	2259.21	94.7	1693.63	94.6	2294.08	94.6	1199.64	94.6	1450.15
94.7	2500.89	94.6	610.633	94.7	2240.86	94.7	1409.69	94.7	2259.37	94.8	1693.74	94.7	2294.26	94.7	1199.76	94.7	1450.29
94.8	2501.09	94.7	610.754	94.8	2241.03	94.8	1409.86	94.8	2259.57	94.9	1693.89	94.8	2294.45	94.8	1199.9	94.8	1450.39
94.9	2501.27	94.8	610.839	94.9	2241.21	94.9	1409.98	94.9	2259.76	95	1694.04	94.9	2294.6	94.9	1200.05	94.9	1450.56
95	2501.43	94.9	610.941	95	2241.4	95	1410.13	95	2259.94	95.1	1694.17	95	2294.78	95	1200.2	95	1450.68
95.1	2501.59	95	611.027	95.1	2241.58	95.1	1410.32	95.1	2260.15	95.2	1694.31	95.1	2294.97	95.1	1200.35	95.1	1450.82
95.2	2501.79	95.1	611.152	95.2	2241.74	95.2	1410.5	95.2	2260.33	95.3	1694.45	95.2	2295.16	95.2	1200.5	95.2	1450.96
95.3	2501.97	95.2	611.218	95.3	2241.89	95.3	1410.66	95.3	2260.52	95.4	1694.58	95.3	2295.36	95.3	1200.66	95.3	1451.11
95.4	2502.15	95.3	611.286	95.4	2242.06	95.4	1410.82	95.4	2260.72	95.5	1694.74	95.4	2295.56	95.4	1200.78	95.4	1451.26
95.5	2502.32	95.4	611.366	95.5	2242.21	95.5	1411	95.5	2260.89	95.6	1694.88	95.5	2295.74	95.5	1200.91	95.5	1451.39
95.6	2502.52	95.5	611.453	95.6	2242.36	95.6	1411.16	95.6	2261.06	95.7	1695.03	95.6	2295.91	95.6	1201.05	95.6	1451.55
95.7	2502.7	95.6	611.512	95.7	2242.53	95.7	1411.33	95.7	2261.25	95.8	1695.18	95.7	2296.07	95.7	1201.18	95.7	1451.7
95.8	2502.88	95.7	611.609	95.8	2242.68	95.8	1411.5	95.8	2261.43	95.9	1695.33	95.8	2296.23	95.8	1201.3	95.8	1451.85
95.9	2503.04	95.8	611.691	95.9	2242.84	95.9	1411.66	95.9	2261.61	96	1695.46	95.9	2296.43	95.9	1201.41	95.9	1451.97
96	2503.26	95.9	611.793	96	2243.01	96	1411.85	96	2261.79	96.1	1695.59	96	2296.63	96	1201.54	96	1452.1
96.1	2503.44	96	611.871	96.1	2243.16	96.1	1412	96.1	2261.98	96.2	1695.7	96.1	2296.8	96.1	1201.66	96.1	1452.23
96.2	2503.64	96.1	611.953	96.2	2243.33	96.2	1412.17	96.2	2262.13	96.3	1695.84	96.2	2296.97	96.2	1201.79	96.2	1452.37
96.3	2503.8	96.2	612.041	96.3	2243.5	96.3	1412.33	96.3	2262.31	96.4	1695.97	96.3	2297.15	96.3	1201.92	96.3	1452.49
96.4	2503.86	96.3	612.141	96.4	2243.71	96.4	1412.51	96.4	2262.45	96.5	1696.11	96.4	2297.31	96.4	1202.05	96.4	1452.61
96.5	2503.97	96.4	612.25	96.5	2243.89	96.5	1412.68	96.5	2262.59	96.6	1696.24	96.5	2297.47	96.5	1202.18	96.5	1452.72
96.6	2504.07	96.5	612.371	96.6	2244.07	96.6	1412.82	96.6	2262.77	96.7	1696.36	96.6	2297.65	96.6	1202.32	96.6	1452.84
96.7	2504.2	96.6	612.473	96.7	2244.24	96.7	1412.97	96.7	2262.96	96.8	1696.48	96.7	2297.84	96.7	1202.45	96.7	1452.96
96.8	2504.39	96.7	612.57	96.8	2244.4	96.8	1413.14	96.8	2263.12	96.9	1696.58	96.8	2298	96.8	1202.56	96.8	1453.09
96.9	2504.6	96.8	612.652	96.9	2244.6	96.9	1413.29	96.9	2263.29	97	1696.72	96.9	2298.2	96.9	1202.68	96.9	1453.21
97	2504.77	96.9	612.737	97	2244.76	97	1413.46	97	2263.46	97.1	1696.86	97	2298.38	97	1202.82	97	1453.33
97.1	2504.94	97	612.825	97.1	2244.92	97.1	1413.63	97.1	2263.62	97.2	1696.99	97.1	2298.56	97.1	1202.94	97.1	1453.48
97.2	2505.11	97.1	612.937	97.2	2245.09	97.2	1413.8	97.2	2263.8	97.3	1697.13	97.2	2298.75	97.2	1203.07	97.2	1453.61
97.3	2505.26	97.2	613.031	97.3	2245.27	97.3	1413.93	97.3	2263.99	97.4	1697.25	97.3	2298.92	97.3	1203.18	97.3	1453.77
97.4	2505.41	97.3	613.121	97.4	2245.44	97.4	1414.09	97.4	2264.17	97.5	1697.39	97.4	2299.06	97.4	1203.3	97.4	1453.91
97.5	2505.58	97.4	613.226	97.5	2245.6	97.5	1414.23	97.5	2264.38	97.6	1697.53	97.5	2299.24	97.5	1203.4	97.5	1454.05
97.6	2505.73	97.5	613.301	97.6	2245.75	97.6	1414.41	97.6	2264.55	97.7	1697.66	97.6	2299.42	97.6	1203.5	97.6	1454.17
97.7	2505.92	97.6	613.402	97.7	2245.92	97.7	1414.56	97.7	2264.71	97.8	1697.81	97.7	2299.59	97.7	1203.63	97.7	1454.31
97.8	2506.1	97.7	613.484	97.8	2246.1	97.8	1414.7	97.8	2264.88	97.9	1697.95	97.8	2299.73	97.8	1203.76	97.8	1454.45
97.9	2506.27	97.8	613.609	97.9	2246.25	97.9	1414.82	97.9	2265.08	98	1698.09	97.9	2299.91	97.9	1203.9	97.9	1454.59
98	2506.43	97.9	613.699	98	2246.42	98	1415.05	98	2265.22	98.1	1698.21	98	2300.11	98	1204.03	98	1454.76
98.1	2506.59	98	613.805	98.1	2246.6	98.1	1415.31	98.1	2265.41	98.2	1698.36	98.1	2300.28	98.1	1204.16	98.1	1454.91
98.2	2506.76	98.1	613.912	98.2	2246.77	98.2	1415.55	98.2	2265.59	98.3	1698.48	98.2	2300.43	98.2	1204.28	98.2	1455.04
98.3	2506.94	98.2	613.98	98.3	2246.92	98.3	1415.83	98.3	2265.76	98.4	1698.6	98.3	2300.56	98.3	1204.42	98.3	1455.18
98.4	2507.1	98.3	614.087	98.4	2247.05	98.4	1415.88	98.4	2265.93	98.5	1698.74	98.4	2300.73	98.4	1204.52	98.4	1455.31
98.5	2507.27	98.4	614.187	98.5	2247.22	98.5	1415.95	98.5	2266.09	98.6	1698.88	98.5	2300.88	98.5	1204.66	98.5	1455.45
98.6	2507.44	98.5	614.27	98.6	2247.42	98.6	1416.09	98.6	2266.28	98.7	1699.01	98.6	2301.02	98.6	1204.76	98.6	1455.61
98.7	2507.58	98.6	614.376	98.7	2247.6	98.7	1416.21	98.7	2266.45	98.8	1699.15	98.7	2301.17	98.7	1204.92	98.7	1455.72
98.8	2507.74	98.7	614.471	98.8	2247.81	98.8	1416.36	98.8	2266.63	98.9	1699.3	98.8	2301.34	98.8	1205.07	98.8	1455.87
98.9	2507.89	98.8	614.59	98.9	2248	98.9	1416.48	98.9	2266.79	99	1699.47	98.9	2301.52	98.9	1205.18	98.9	1455.99
99	2508.04	98.9	614.652	99	2248.15	99	1416.61	99	2266.96	99.1	1699.61	99	2301.7	99	1205.3	99	1456.11
99.1	2508.2	99	614.742	99.1	2248.32	99.1	1416.76	99.1	2267.12	99.2	1699.76	99.1	2301.87	99.1	1205.43	99.1	1456.2
99.2	2508.36	99.1	614.823	99.2	2248.49	99.2	1416.94	99.2	2267.29	99.3	1699.91	99.2	2302.02	99.2	1205.55	99.2	1456.29
99.3	2508.52	99.2	614.91	99.3	2248.67	99.3	1417.11	99.3	2267.45	99.4	1700.08	99.3	2302.19	99.3	1205.67	99.3	1456.42
99.4	2508.69	99.3	615	99.4	2248.84	99.4	1417.25	99.4	2267.63	99.5	1700.18	99.4	2302.38	99.4	1205.78	99.4	1456.55
99.5	2508.85	99.4	615.09	99.5	2249.01	99.5	1417.41	99.5	2267.8	99.6	1700.31	99.5	2302.54	99.5	1205.9	99.5	1456.68
99.6	2509.01	99.5	615.196	99.6	2249.19	99.6	1417.56	99.6	2267.96	99.7	1700.46	99.6	2302.71	99.6	1206.04	99.6	1456.81
99.7	2509.16	99.6	615.291	99.7	2249.36	99.7	1417.7	99.7	2268.12	99.8	1700.61	99.7	2302.91	99.7	1206.18	99.7	1456.92
99.8	2509.34	99.7	615.364	99.8	2249.52	99.8	1417.87	99.8	2268.3	99.9	1700.74	99.8	2303.08	99.8	1206.29	99.8	1457.05
99.9	2509.51	99.8	615.453	99.9	2249.68	99.9	1418.02	99.9	2268.46	100	1700.87	99.9	2303.25	99.9	1206.38	99.9	1457.16
100	2509.68	99.9	615.534	100	2249.83	100	1418.17	100	2268.64	100.1	1701	100	2303.41	100	1206.51	100	1457.26
100.1	2509.86	100	615.621	100.1	2250.02	100.1	1418.34	100.1	2268.81	100.2	1701.15	100.1	2303.56	100.1	1206.65	100.1	1457.39
100.2	2510.04	100.1	615.711	100.2	2250.19	100.2	1418.47	100.2	2268.98	100.3	1701.28	100.2	2303.71	100.2	1206.78	100.2	1457.55
100.3	2510.21	100.2	615.813	100.3	2250.35	100.3	1418.66	100.3	2269.13	100.4	1701.41	100.3	2303.88	100.3	1206.91	100.3	1457.67
100.4	2510.36	100.3	615.917	100.4	2250.53	100.4	1418.8	100.4	2269.3	100.5	1701.56	100.4	2304.03	100.4	1207.05	100.4	1457.78
100.5	2510.52	100.4	616	100.5	2250.66	100.5	1418.91	100.5	2269.48	100.6	1701.7	100.5	2304.19	100.5	1207.16	100.5	1457.89
100.6	2510.7	100.5	616.102	100.6	2250.81	100.6	1419.07	100.6	2269.63	100.7	1701.82	100.6	2304.37	100.6	1207.27	100.6	1457.99
100.7	2510.85	100.6	616.172	100.7	2250.95	100.7	1419.24	100.7	2269.78	100.8	1701.93	100.7	2304.54	100.7	1207.39	100.7	1458.1
100.8	2511.02	100.7	616.257	100.8	2251.09	100.8	1419.41	100.8	2269.95	100.9	1702.05	100.8	2304.71	100.8	1207.51	100.8	1458.22
100.9	2511.18	100.8	616.371	100.9	2251.23	100.9	1419.57	100.9	2270.12	101	1702.18	100.9	2304.87	100.9	1207.63	100.9	1458.32
101	2511.33	100.9	616.473	101	2251.38	101	1419.73	101	2270.32	101.1	1702.31	101	2305.03	101	1207.76	101	1458.42
101.1	2511.48	101	616.554	101.1	2251.52	101.1	1419.9	101.1	2270.49	101.2	1702.44	101.1	2305.22	101.1	1207.88	101.1	1458.55
101.2	2511.64	101.1	616.653	101.2	2251.64	101.2	1420.04	101.2	2270.66	101.3	1702.58	101.2	2305.41	101.2	1207.98	101.2	1458.67
101.3	2511.79	101.2	616.73	101.3	2251.81	101.3	1420.17	101.3	2270.83	101.4	1702.72	101.3	2305.58	101.3	1208.08	101.3	1458.78
101.4	2511.95	101.3	616.835	101.4	2251.98	101.4	1420.35	101.4	2270.99	101.5	1702.87	101.4	2305.75	101.4	1208.2	101.4	1458.92
101.5	2512.1	101.4	616.922	101.5	2252.11	101.5	1420.5	101.5	2271.15	101.6	1703	101.5	2305.91	101.5	1208.32	101.5	1459.03
101.6	2512.26	101.5	617	101.6	2252.28	101.6	1420.66	101.6	2271.3	101.7	1703.15	101.6	2306.02	101.6	1208.44	101.6	1459.16
101.7	2512.39	101.6	617.102	101.7	2252.45	101.7	1420.83	101.7	2271.47	101.8	1703.29	101.7	2306.16	101.7	1208.57	101.7	1459.31
101.8	2512.53	101.7	617.211	101.8	2252.62	101.8	1420.98	101.8	2271.62	101.9	1703.44	101.8	2306.29	101.8	1208.66	101.8	1459.44
101.9	2512.68	101.8	617.324	101.9	2252.79	101.9	1421.15	101.9	2271.79	102	1703.57	101.9	2306.43	101.9	1208.78	101.9	1459.59
102	2512.84	101.9	617.425	102	2252.94	102	1421.32	102	2271.96	102.1	1703.7	102	2306.56	102	1208.88	102	1459.73
102.1	2513.01	102	617.5	102.1	2253.1	102.1	1421.48	102.1	2272.11	102.2	1703.84	102.1	2306.7	102.1	1208.98	102.1	1459.87
102.2	2513.16	102.1	617.616	102.2	2253.24	102.2	1421.67	102.2	2272.27	102.3	1703.98	102.2	2306.84	102.2	1209.08	102.2	1460
102.3	2513.34	102.2	617.704	102.3	2253.38	102.3	1421.84	102.3	2272.44	102.4	1704.11	102.3	2307	102.3	1209.23	102.3	1460.13
102.4	2513.51	102.3	617.813	102.4	2253.52	102.4	1421.98	102.4	2272.6	102.5	1704.23	102.4	2307.16	102.4	1209.35	102.4	1460.27
102.5	2513.69	102.4	617.93	102.5	2253.65	102.5	1422.11	102.5	2272.78	102.6	1704.34	102.5	2307.33	102.5	1209.49	102.5	1460.4
102.6	2513.86	102.5	618.063	102.6	2253.81	102.6	1422.27	102.6	2272.93	102.7	1704.46	102.6	2307.49	102.6	1209.61	102.6	1460.54
102.7	2514.03	102.6	618.164	102.7	2253.96	102.7	1422.46	102.7	2273.12	102.8	1704.58	102.7	2307.67	102.7	1209.73	102.7	1460.69
102.8	2514.23	102.7	618.265	102.8	2254.14	102.8	1422.63	102.8	2273.3	102.9	1704.71	102.8	2307.82	102.8	1209.85	102.8	1460.82
102.9	2514.39	102.8	618.366	102.9	2254.29	102.9	1422.8	102.9	2273.49	103	1704.83	102.9	2307.99	102.9	1209.98	102.9	1460.98
103	2514.56	102.9	618.48	103	2254.44	103	1422.94	103	2273.67	103.1	1704.97	103	2308.14	103	1210.1	103	1461.11
103.1	2514.73	103	618.57	103.1	2254.62	103.1	1423.08	103.1	2273.84	103.2	1705.1	103.1	2308.32	103.1	1210.21	103.1	1461.25
103.2	2514.89	103.1	618.684	103.2	2254.78	103.2	1423.22	103.2	2273.99	103.3	1705.24	103.2	2308.49	103.2	1210.33	103.2	1461.38
103.3	2515.05	103.2	618.777	103.3	2254.94	103.3	1423.37	103.3	2274.16	103.4	1705.36	103.3	2308.65	103.3	1210.41	103.3	1461.51
103.4	2515.2	103.3	618.891	103.4	2255.12	103.4	1423.55	103.4	2274.32	103.5	1705.49	103.4	2308.79	103.4	1210.51	103.4	1461.63
103.5	2515.34	103.4	618.969	103.5	2255.27	103.5	1423.71	103.5	2274.48	103.6	1705.63	103.5	2308.97	103.5	1210.63	103.5	1461.77
103.6	2515.47	103.5	619.07	103.6	2255.41	103.6	1423.86	103.6	2274.62	103.7	1705.77	103.6	2309.14	103.6	1210.72	103.6	1461.9
103.7	2515.59	103.6	619.141	103.7	2255.54	103.7	1424	103.7	2274.76	103.8	1705.9	103.7	2309.33	103.7	1210.83	103.7	1462.05
103.8	2515.73	103.7	619.223	103.8	2255.68	103.8	1424.12	103.8	2274.91	103.9	1706.03	103.8	2309.5	103.8	1210.94	103.8	1462.17
103.9	2515.87	103.8	619.316	103.9	2255.79	103.9	1424.26	103.9	2275.04	104	1706.17	103.9	2309.66	103.9	1211.07	103.9	1462.29
104	2516.04	103.9	619.415	104	2255.9	104	1424.41	104	2275.19	104.1	1706.28	104	2309.84	104	1211.21	104	1462.37
104.1	2516.18	104	619.495	104.1	2256.04	104.1	1424.55	104.1	2275.33	104.2	1706.38	104.1	2310	104.1	1211.32	104.1	1462.47
104.2	2516.34	104.1	619.582	104.2	2256.16	104.2	1424.7	104.2	2275.48	104.3	1706.52	104.2	2310.18	104.2	1211.43	104.2	1462.58
104.3	2516.49	104.2	619.691	104.3	2256.29	104.3	1424.86	104.3	2275.63	104.4	1706.62	104.3	2310.35	104.3	1211.55	104.3	1462.71
104.4	2516.63	104.3	619.793	104.4	2256.44	104.4	1425	104.4	2275.77	104.5	1706.73	104.4	2310.51	104.4	1211.68	104.4	1462.85
104.5	2516.76	104.4	619.898	104.5	2256.57	104.5	1425.13	104.5	2275.93	104.6	1706.86	104.5	2310.63	104.5	1211.8	104.5	1462.94
104.6	2516.91	104.5	619.98	104.6	2256.72	104.6	1425.29	104.6	2276.12	104.7	1706.96	104.6	2310.75	104.6	1211.93	104.6	1463.08
104.7	2517.08	104.6	620.073	104.7	2256.87	104.7	1425.4	104.7	2276.26	104.8	1707.08	104.7	2310.9	104.7	1212.07	104.7	1463.2
104.8	2517.23	104.7	620.16	104.8	2257.01	104.8	1425.54	104.8	2276.42	104.9	1707.17	104.8	2311.05	104.8	1212.19	104.8	1463.34
104.9	2517.39	104.8	620.274	104.9	2257.17	104.9	1425.67	104.9	2276.59	105	1707.27	104.9	2311.2	104.9	1212.32	104.9	1463.48
105	2517.55	104.9	620.366	105	2257.33	105	1425.8	105	2276.75	105.1	1707.38	105	2311.33	105	1212.42	105	1463.61
105.1	2517.69	105	620.441	105.1	2257.47	105.1	1425.98	105.1	2276.9	105.2	1707.49	105.1	2311.46	105.1	1212.55	105.1	1463.72
105.2	2517.83	105.1	620.551	105.2	2257.63	105.2	1426.13	105.2	2277.05	105.3	1707.63	105.2	2311.65	105.2	1212.66	105.2	1463.87
105.3	2517.97	105.2	620.641	105.3	2257.79	105.3	1426.3	105.3	2277.18	105.4	1707.73	105.3	2311.79	105.3	1212.79	105.3	1463.98
105.4	2518.12	105.3	620.714	105.4	2257.94	105.4	1426.44	105.4	2277.33	105.5	1707.85	105.4	2311.97	105.4	1212.89	105.4	1464.09
105.5	2518.28	105.4	620.813	105.5	2258.09	105.5	1426.57	105.5	2277.47	105.6	1707.95	105.5	2312.12	105.5	1212.99	105.5	1464.21
105.6	2518.44	105.5	620.891	105.6	2258.25	105.6	1426.74	105.6	2277.59	105.7	1708.06	105.6	2312.26	105.6	1213.12	105.6	1464.31
105.7	2518.59	105.6	620.973	105.7	2258.41	105.7	1426.93	105.7	2277.74	105.8	1708.17	105.7	2312.42	105.7	1213.22	105.7	1464.42
105.8	2518.72	105.7	621.074	105.8	2258.54	105.8	1427.11	105.8	2277.91	105.9	1708.29	105.8	2312.56	105.8	1213.32	105.8	1464.52
105.9	2518.89	105.8	621.172	105.9	2258.71	105.9	1427.22	105.9	2278.06	106	1708.41	105.9	2312.68	105.9	1213.45	105.9	1464.61
106	2519.04	105.9	621.245	106	2258.86	106	1427.36	106	2278.21	106.1	1708.55	106	2312.82	106	1213.57	106	1464.71
106.1	2519.18	106	621.335	106.1	2259.03	106.1	1427.52	106.1	2278.36	106.2	1708.67	106.1	2312.98	106.1	1213.69	106.1	1464.8
106.2	2519.34	106.1	621.454	106.2	2259.2	106.2	1427.65	106.2	2278.51	106.3	1708.81	106.2	2313.12	106.2	1213.76	106.2	1464.91
106.3	2519.49	106.2	621.574	106.3	2259.37	106.3	1427.8	106.3	2278.67	106.4	1708.94	106.3	2313.29	106.3	1213.85	106.3	1465.01
106.4	2519.65	106.3	621.664	106.4	2259.53	106.4	1427.95	106.4	2278.84	106.5	1709.06	106.4	2313.43	106.4	1213.96	106.4	1465.13
106.5	2519.79	106.4	621.741	106.5	2259.7	106.5	1428.09	106.5	2278.99	106.6	1709.16	106.5	2313.57	106.5	1214.05	106.5	1465.24
106.6	2519.92	106.5	621.832	106.6	2259.85	106.6	1428.23	106.6	2279.15	106.7	1709.31	106.6	2313.74	106.6	1214.15	106.6	1465.38
106.7	2520.07	106.6	621.927	106.7	2260	106.7	1428.39	106.7	2279.29	106.8	1709.43	106.7	2313.9	106.7	1214.24	106.7	1465.49
106.8	2520.21	106.7	622.043	106.8	2260.16	106.8	1428.53	106.8	2279.46	106.9	1709.56	106.8	2314.06	106.8	1214.34	106.8	1465.59
106.9	2520.35	106.8	622.136	106.9	2260.35	106.9	1428.67	106.9	2279.62	107	1709.67	106.9	2314.22	106.9	1214.39	106.9	1465.71
107	2520.48	106.9	622.203	107	2260.46	107	1428.81	107	2279.78	107.1	1709.82	107	2314.39	107	1214.51	107	1465.83
107.1	2520.62	107	622.281	107.1	2260.59	107.1	1428.95	107.1	2279.94	107.2	1709.93	107.1	2314.55	107.1	1214.67	107.1	1465.93
107.2	2520.76	107.1	622.352	107.2	2260.72	107.2	1429.08	107.2	2280.09	107.3	1710.07	107.2	2314.7	107.2	1214.79	107.2	1466.06
107.3	2520.91	107.2	622.441	107.3	2260.86	107.3	1429.22	107.3	2280.25	107.4	1710.2	107.3	2314.86	107.3	1214.9	107.3	1466.17
107.4	2521.04	107.3	622.538	107.4	2261	107.4	1429.37	107.4	2280.4	107.5	1710.32	107.4	2315.01	107.4	1215.02	107.4	1466.28
107.5	2521.19	107.4	622.652	107.5	2261.14	107.5	1429.52	107.5	2280.55	107.6	1710.44	107.5	2315.17	107.5	1215.15	107.5	1466.39
107.6	2521.32	107.5	622.742	107.6	2261.29	107.6	1429.67	107.6	2280.7	107.7	1710.57	107.6	2315.31	107.6	1215.28	107.6	1466.49
107.7	2521.48	107.6	622.824	107.7	2261.42	107.7	1429.83	107.7	2280.86	107.8	1710.7	107.7	2315.46	107.7	1215.42	107.7	1466.57
107.8	2521.64	107.7	622.863	107.8	2261.57	107.8	1429.97	107.8	2281.02	107.9	1710.86	107.8	2315.61	107.8	1215.52	107.8	1466.67
107.9	2521.8	107.8	622.937	107.9	2261.71	107.9	1430.13	107.9	2281.17	108	1711	107.9	2315.74	107.9	1215.63	107.9	1466.78
108	2521.95	107.9	623.034	108	2261.85	108	1430.27	108	2281.31	108.1	1711.13	108	2315.89	108	1215.73	108	1466.9
108.1	2522.11	108	623.141	108.1	2261.99	108.1	1430.4	108.1	2281.46	108.2	1711.24	108.1	2316.03	108.1	1215.82	108.1	1467.01
108.2	2522.24	108.1	623.23	108.2	2262.12	108.2	1430.54	108.2	2281.6	108.3	1711.4	108.2	2316.19	108.2	1215.93	108.2	1467.13
108.3	2522.31	108.2	623.32	108.3	2262.28	108.3	1430.67	108.3	2281.78	108.4	1711.55	108.3	2316.34	108.3	1216.04	108.3	1467.24
108.4	2522.46	108.3	623.383	108.4	2262.42	108.4	1430.82	108.4	2281.96	108.5	1711.69	108.4	2316.5	108.4	1216.18	108.4	1467.38
108.5	2522.61	108.4	623.464	108.5	2262.54	108.5	1430.98	108.5	2282.13	108.6	1711.81	108.5	2316.67	108.5	1216.31	108.5	1467.51
108.6	2522.76	108.5	623.555	108.6	2262.69	108.6	1431.14	108.6	2282.31	108.7	1711.86	108.6	2316.84	108.6	1216.42	108.6	1467.62
108.7	2522.9	108.6	623.641	108.7	2262.82	108.7	1431.29	108.7	2282.46	108.8	1711.84	108.7	2317.01	108.7	1216.54	108.7	1467.75
108.8	2523.03	108.7	623.734	108.8	2262.97	108.8	1431.45	108.8	2282.62	108.9	1711.79	108.8	2317.16	108.8	1216.67	108.8	1467.85
108.9	2523.15	108.8	623.835	108.9	2263.11	108.9	1431.63	108.9	2282.78	109	1712.18	108.9	2317.32	108.9	1216.81	108.9	1468.01
109	2523.3	108.9	623.934	109	2263.25	109	1431.78	109	2282.94	109.1	1712.58	109	2317.5	109	1216.92	109	1468.13
109.1	2523.46	109	624.031	109.1	2263.41	109.1	1431.95	109.1	2283.09	109.2	1712.71	109.1	2317.66	109.1	1217.05	109.1	1468.25
109.2	2523.62	109.1	624.113	109.2	2263.55	109.2	1432.11	109.2	2283.23	109.3	1712.87	109.2	2317.82	109.2	1217.19	109.2	1468.35
109.3	2523.78	109.2	624.203	109.3	2263.71	109.3	1432.25	109.3	2283.41	109.4	1713	109.3	2317.99	109.3	1217.32	109.3	1468.47
109.4	2523.91	109.3	624.291	109.4	2263.84	109.4	1432.4	109.4	2283.55	109.5	1713.11	109.4	2318.15	109.4	1217.48	109.4	1468.55
109.5	2524.06	109.4	624.391	109.5	2264	109.5	1432.54	109.5	2283.68	109.6	1713.19	109.5	2318.29	109.5	1217.59	109.5	1468.67
109.6	2524.2	109.5	624.485	109.6	2264.16	109.6	1432.67	109.6	2283.83	109.7	1713.29	109.6	2318.44	109.6	1217.68	109.6	1468.81
109.7	2524.35	109.6	624.582	109.7	2264.28	109.7	1432.84	109.7	2283.95	109.8	1713.4	109.7	2318.59	109.7	1217.82	109.7	1468.92
109.8	2524.48	109.7	624.675	109.8	2264.43	109.8	1432.99	109.8	2284.11	109.9	1713.52	109.8	2318.75	109.8	1217.91	109.8	1469.02
109.9	2524.64	109.8	624.789	109.9	2264.59	109.9	1433.15	109.9	2284.26	110	1713.62	109.9	2318.94	109.9	1218.02	109.9	1469.1
110	2524.79	109.9	624.902	110	2264.73	110	1433.29	110	2284.4	110.1	1713.73	110	2319.11	110	1218.12	110	1469.2
110.1	2524.91	110	625.004	110.1	2264.88	110.1	1433.45	110.1	2284.53	110.2	1713.82	110.1	2319.25	110.1	1218.25	110.1	1469.3
110.2	2525.07	110.1	625.085	110.2	2265.01	110.2	1433.59	110.2	2284.66	110.3	1713.93	110.2	2319.4	110.2	1218.38	110.2	1469.44
110.3	2525.22	110.2	625.18	110.3	2265.17	110.3	1433.75	110.3	2284.78	110.4	1714.05	110.3	2319.56	110.3	1218.48	110.3	1469.54
110.4	2525.36	110.3	625.266	110.4	2265.32	110.4	1433.91	110.4	2284.9	110.5	1714.18	110.4	2319.7	110.4	1218.6	110.4	1469.66
110.5	2525.5	110.4	625.347	110.5	2265.48	110.5	1434.06	110.5	2285.05	110.6	1714.29	110.5	2319.86	110.5	1218.68	110.5	1469.77
110.6	2525.65	110.5	625.414	110.6	2265.6	110.6	1434.2	110.6	2285.19	110.7	1714.41	110.6	2320.04	110.6	1218.78	110.6	1469.86
110.7	2525.81	110.6	625.495	110.7	2265.77	110.7	1434.34	110.7	2285.31	110.8	1714.51	110.7	2320.18	110.7	1218.89	110.7	1469.97
110.8	2525.95	110.7	625.582	110.8	2265.93	110.8	1434.46	110.8	2285.46	110.9	1714.65	110.8	2320.32	110.8	1218.98	110.8	1470.07
110.9	2526.09	110.8	625.652	110.9	2266.07	110.9	1434.58	110.9	2285.59	111	1714.77	110.9	2320.45	110.9	1219.09	110.9	1470.19
111	2526.23	110.9	625.726	111	2266.22	111	1434.71	111	2285.72	111.1	1714.9	111	2320.59	111	1219.19	111	1470.29
111.1	2526.36	111	625.801	111.1	2266.34	111.1	1434.83	111.1	2285.87	111.2	1715.02	111.1	2320.74	111.1	1219.29	111.1	1470.39
111.2	2526.53	111.1	625.891	111.2	2266.47	111.2	1434.98	111.2	2286.02	111.3	1715.15	111.2	2320.89	111.2	1219.36	111.2	1470.52
111.3	2526.66	111.2	625.973	111.3	2266.6	111.3	1435.14	111.3	2286.17	111.4	1715.29	111.3	2321.03	111.3	1219.43	111.3	1470.6
111.4	2526.79	111.3	626.063	111.4	2266.71	111.4	1435.26	111.4	2286.32	111.5	1715.41	111.4	2321.18	111.4	1219.52	111.4	1470.71
111.5	2526.95	111.4	626.133	111.5	2266.99	111.5	1435.4	111.5	2286.48	111.6	1715.52	111.5	2321.35	111.5	1219.61	111.5	1470.81
111.6	2527.07	111.5	626.226	111.6	2267.12	111.6	1435.52	111.6	2286.62	111.7	1715.66	111.6	2321.47	111.6	1219.73	111.6	1470.93
111.7	2527.2	111.6	626.313	111.7	2267.18	111.7	1435.65	111.7	2286.78	111.8	1715.78	111.7	2321.59	111.7	1219.82	111.7	1471.03
111.8	2527.34	111.7	626.395	111.8	2267.3	111.8	1435.77	111.8	2286.93	111.9	1715.89	111.8	2321.77	111.8	1219.9	111.8	1471.14
111.9	2527.47	111.8	626.491	111.9	2267.42	111.9	1435.93	111.9	2287.1	112	1716.01	111.9	2321.92	111.9	1220.01	111.9	1471.26
112	2527.62	111.9	626.575	112	2267.54	112	1436.07	112	2287.25	112.1	1716.12	112	2322.08	112	1220.11	112	1471.39
112.1	2527.78	112	626.652	112.1	2267.66	112.1	1436.2	112.1	2287.37	112.2	1716.24	112.1	2322.24	112.1	1220.21	112.1	1471.51
112.2	2527.94	112.1	626.737	112.2	2267.77	112.2	1436.38	112.2	2287.51	112.3	1716.36	112.2	2322.38	112.2	1220.31	112.2	1471.61
112.3	2528.08	112.2	626.82	112.3	2267.87	112.3	1436.54	112.3	2287.64	112.4	1716.47	112.3	2322.54	112.3	1220.4	112.3	1471.72
112.4	2528.22	112.3	626.883	112.4	2268	112.4	1436.69	112.4	2287.78	112.5	1716.57	112.4	2322.7	112.4	1220.56	112.4	1471.81
112.5	2528.34	112.4	626.941	112.5	2268.12	112.5	1436.83	112.5	2287.91	112.6	1716.67	112.5	2322.84	112.5	1220.66	112.5	1471.93
112.6	2528.48	112.5	627.031	112.6	2268.24	112.6	1437	112.6	2288.01	112.7	1716.78	112.6	2322.97	112.6	1220.77	112.6	1472.04
112.7	2528.63	112.6	627.113	112.7	2268.35	112.7	1437.18	112.7	2288.12	112.8	1716.86	112.7	2323.11	112.7	1220.92	112.7	1472.16
112.8	2528.77	112.7	627.218	112.8	2268.47	112.8	1437.32	112.8	2288.28	112.9	1716.95	112.8	2323.24	112.8	1221.01	112.8	1472.28
112.9	2528.92	112.8	627.293	112.9	2268.61	112.9	1437.44	112.9	2288.42	113	1717.07	112.9	2323.36	112.9	1221.08	112.9	1472.39
113	2529.07	112.9	627.366	113	2268.76	113	1437.56	113	2288.61	113.1	1717.16	113	2323.49	113	1221.14	113	1472.48
113.1	2529.22	113	627.449	113.1	2268.91	113.1	1437.7	113.1	2288.7	113.2	1717.24	113.1	2323.61	113.1	1221.25	113.1	1472.56
113.2	2529.35	113.1	627.539	113.2	2269.06	113.2	1437.83	113.2	2288.9	113.3	1717.32	113.2	2323.75	113.2	1221.34	113.2	1472.68
113.3	2529.47	113.2	627.641	113.3	2269.19	113.3	1437.93	113.3	2289.07	113.4	1717.43	113.3	2323.88	113.3	1221.44	113.3	1472.79
113.4	2529.6	113.3	627.716	113.4	2269.32	113.4	1438.06	113.4	2289.11	113.5	1717.6	113.4	2324	113.4	1221.56	113.4	1472.91
113.5	2529.72	113.4	627.803	113.5	2269.44	113.5	1438.18	113.5	2289.3	113.6	1717.76	113.5	2324.11	113.5	1221.66	113.5	1473.02
113.6	2529.86	113.5	627.879	113.6	2269.57	113.6	1438.31	113.6	2289.47	113.7	1717.87	113.6	2324.25	113.6	1221.75	113.6	1473.16
113.7	2529.98	113.6	627.922	113.7	2269.7	113.7	1438.45	113.7	2289.64	113.8	1717.99	113.7	2324.36	113.7	1221.87	113.7	1473.29
113.8	2530.11	113.7	627.985	113.8	2269.86	113.8	1438.59	113.8	2289.78	113.9	1718.14	113.8	2324.49	113.8	1221.98	113.8	1473.39
113.9	2530.24	113.8	628.046	113.9	2270.01	113.9	1438.72	113.9	2289.92	114	1718.28	113.9	2324.62	113.9	1222.08	113.9	1473.51
114	2530.38	113.9	628.141	114	2270.14	114	1438.88	114	2290.05	114.1	1718.39	114	2324.75	114	1222.18	114	1473.62
114.1	2530.53	114	628.184	114.1	2270.28	114.1	1439.03	114.1	2290.21	114.2	1718.51	114.1	2324.89	114.1	1222.27	114.1	1473.74
114.2	2530.66	114.1	628.273	114.2	2270.43	114.2	1439.18	114.2	2290.34	114.3	1718.61	114.2	2325.04	114.2	1222.38	114.2	1473.86
114.3	2530.81	114.2	628.347	114.3	2270.55	114.3	1439.33	114.3	2290.47	114.4	1718.74	114.3	2325.18	114.3	1222.46	114.3	1473.99
114.4	2530.96	114.3	628.422	114.4	2270.71	114.4	1439.5	114.4	2290.6	114.5	1718.82	114.4	2325.33	114.4	1222.56	114.4	1474.11
114.5	2531.09	114.4	628.5	114.5	2270.84	114.5	1439.66	114.5	2290.71	114.6	1718.93	114.5	2325.46	114.5	1222.66	114.5	1474.21
114.6	2531.25	114.5	628.585	114.6	2270.99	114.6	1439.82	114.6	2290.84	114.7	1719.06	114.6	2325.61	114.6	1222.76	114.6	1474.34
114.7	2531.4	114.6	628.672	114.7	2271.14	114.7	1439.97	114.7	2290.94	114.8	1719.18	114.7	2325.76	114.7	1222.87	114.7	1474.44
114.8	2531.54	114.7	628.766	114.8	2271.28	114.8	1440.11	114.8	2291.08	114.9	1719.29	114.8	2325.91	114.8	1222.97	114.8	1474.54
114.9	2531.68	114.8	628.855	114.9	2271.41	114.9	1440.25	114.9	2291.22	115	1719.46	114.9	2326.07	114.9	1223.07	114.9	1474.64
115	2531.83	114.9	628.966	115	2271.53	115	1440.42	115	2291.33	115.1	1719.63	115	2326.22	115	1223.17	115	1474.76
115.1	2531.96	115	629.066	115.1	2271.65	115.1	1440.57	115.1	2291.48	115.2	1719.77	115.1	2326.36	115.1	1223.27	115.1	1474.88
115.2	2532.09	115.1	629.187	115.2	2271.78	115.2	1440.72	115.2	2291.61	115.3	1719.84	115.2	2326.49	115.2	1223.39	115.2	1474.99
115.3	2532.22	115.2	629.274	115.3	2271.91	115.3	1440.86	115.3	2291.77	115.4	1719.94	115.3	2326.61	115.3	1223.49	115.3	1475.11
115.4	2532.36	115.3	629.374	115.4	2272.05	115.4	1441.01	115.4	2291.92	115.5	1720.05	115.4	2326.74	115.4	1223.62	115.4	1475.2
115.5	2532.48	115.4	629.466	115.5	2272.21	115.5	1441.14	115.5	2292.07	115.6	1720.15	115.5	2326.87	115.5	1223.75	115.5	1475.3
115.6	2532.63	115.5	629.551	115.6	2272.36	115.6	1441.29	115.6	2292.19	115.7	1720.27	115.6	2327.01	115.6	1223.83	115.6	1475.41
115.7	2532.73	115.6	629.628	115.7	2272.51	115.7	1441.42	115.7	2292.32	115.8	1720.38	115.7	2327.16	115.7	1223.92	115.7	1475.52
115.8	2532.85	115.7	629.711	115.8	2272.64	115.8	1441.59	115.8	2292.48	115.9	1720.47	115.8	2327.29	115.8	1224.03	115.8	1475.62
115.9	2532.97	115.8	629.796	115.9	2272.81	115.9	1441.7	115.9	2292.61	116	1720.59	115.9	2327.41	115.9	1224.13	115.9	1475.71
116	2533.09	115.9	629.895	116	2272.95	116	1441.83	116	2292.73	116.1	1720.73	116	2327.51	116	1224.27	116	1475.83
116.1	2533.22	116	629.98	116.1	2273.1	116.1	1441.96	116.1	2292.88	116.2	1720.83	116.1	2327.63	116.1	1224.42	116.1	1475.93
116.2	2533.35	116.1	630.066	116.2	2273.24	116.2	1442.09	116.2	2293.01	116.3	1720.93	116.2	2327.77	116.2	1224.55	116.2	1476.01
116.3	2533.48	116.2	630.141	116.3	2273.38	116.3	1442.22	116.3	2293.16	116.4	1721.03	116.3	2327.91	116.3	1224.68	116.3	1476.12
116.4	2533.61	116.3	630.214	116.4	2273.5	116.4	1442.36	116.4	2293.3	116.5	1721.13	116.4	2328.06	116.4	1224.81	116.4	1476.2
116.5	2533.74	116.4	630.325	116.5	2273.62	116.5	1442.5	116.5	2293.43	116.6	1721.22	116.5	2328.2	116.5	1224.96	116.5	1476.3
116.6	2533.87	116.5	630.391	116.6	2273.73	116.6	1442.64	116.6	2293.58	116.7	1721.36	116.6	2328.35	116.6	1225.03	116.6	1476.42
116.7	2534	116.6	630.469	116.7	2273.84	116.7	1442.8	116.7	2293.71	116.8	1721.46	116.7	2328.5	116.7	1225.11	116.7	1476.54
116.8	2534.14	116.7	630.577	116.8	2273.95	116.8	1442.93	116.8	2293.84	116.9	1721.55	116.8	2328.64	116.8	1225.18	116.8	1476.64
116.9	2534.26	116.8	630.66	116.9	2274.06	116.9	1443.07	116.9	2293.98	117	1721.65	116.9	2328.78	116.9	1225.27	116.9	1476.75
117	2534.41	116.9	630.735	117	2274.17	117	1443.21	117	2294.12	117.1	1721.77	117	2328.9	117	1225.36	117	1476.86
117.1	2534.56	117	630.823	117.1	2274.29	117.1	1443.36	117.1	2294.26	117.2	1721.87	117.1	2329.08	117.1	1225.45	117.1	1476.93
117.2	2534.7	117.1	630.884	117.2	2274.4	117.2	1443.49	117.2	2294.41	117.3	1721.98	117.2	2329.2	117.2	1225.53	117.2	1477.04
117.3	2534.82	117.2	630.956	117.3	2274.53	117.3	1443.64	117.3	2294.53	117.4	1722.09	117.3	2329.32	117.3	1225.62	117.3	1477.13
117.4	2534.95	117.3	631.039	117.4	2274.64	117.4	1443.78	117.4	2294.65	117.5	1722.23	117.4	2329.46	117.4	1225.72	117.4	1477.22
117.5	2535.1	117.4	631.114	117.5	2274.77	117.5	1443.92	117.5	2294.8	117.6	1722.35	117.5	2329.57	117.5	1225.82	117.5	1477.33
117.6	2535.25	117.5	631.172	117.6	2274.88	117.6	1444.09	117.6	2294.93	117.7	1722.45	117.6	2329.7	117.6	1225.93	117.6	1477.45
117.7	2535.38	117.6	631.257	117.7	2275	117.7	1444.23	117.7	2295.05	117.8	1722.55	117.7	2329.83	117.7	1226.05	117.7	1477.54
117.8	2535.51	117.7	631.332	117.8	2275.13	117.8	1444.37	117.8	2295.18	117.9	1722.67	117.8	2329.95	117.8	1226.18	117.8	1477.62
117.9	2535.65	117.8	631.386	117.9	2275.28	117.9	1444.5	117.9	2295.31	118	1722.8	117.9	2330.07	117.9	1226.3	117.9	1477.71
118	2535.79	117.9	631.461	118	2275.42	118	1444.63	118	2295.44	118.1	1722.9	118	2330.21	118	1226.42	118	1477.82
118.1	2535.9	118	631.551	118.1	2275.53	118.1	1444.76	118.1	2295.58	118.2	1723.01	118.1	2330.35	118.1	1226.53	118.1	1477.92
118.2	2536.03	118.1	631.621	118.2	2275.64	118.2	1444.89	118.2	2295.71	118.3	1723.1	118.2	2330.49	118.2	1226.65	118.2	1478.04
118.3	2536.14	118.2	631.672	118.3	2275.75	118.3	1445.04	118.3	2295.84	118.4	1723.19	118.3	2330.63	118.3	1226.76	118.3	1478.14
118.4	2536.27	118.3	631.745	118.4	2275.85	118.4	1445.14	118.4	2295.98	118.5	1723.3	118.4	2330.77	118.4	1226.87	118.4	1478.25
118.5	2536.4	118.4	631.813	118.5	2275.97	118.5	1445.27	118.5	2296.13	118.6	1723.4	118.5	2330.92	118.5	1226.96	118.5	1478.32
118.6	2536.51	118.5	631.917	118.6	2276.08	118.6	1445.39	118.6	2296.26	118.7	1723.48	118.6	2331.05	118.6	1227.06	118.6	1478.41
118.7	2536.6	118.6	631.992	118.7	2276.19	118.7	1445.52	118.7	2296.38	118.8	1723.6	118.7	2331.19	118.7	1227.16	118.7	1478.51
118.8	2536.73	118.7	632.075	118.8	2276.31	118.8	1445.65	118.8	2296.53	118.9	1723.71	118.8	2331.35	118.8	1227.25	118.8	1478.62
118.9	2536.84	118.8	632.162	118.9	2276.43	118.9	1445.8	118.9	2296.68	119	1723.82	118.9	2331.49	118.9	1227.35	118.9	1478.74
119	2536.98	118.9	632.255	119	2276.53	119	1445.93	119	2296.82	119.1	1723.94	119	2331.59	119	1227.45	119	1478.86
119.1	2537.1	119	632.352	119.1	2276.63	119.1	1446.06	119.1	2296.97	119.2	1724.07	119.1	2331.72	119.1	1227.51	119.1	1478.94
119.2	2537.21	119.1	632.417	119.2	2276.77	119.2	1446.21	119.2	2297.1	119.3	1724.2	119.2	2331.86	119.2	1227.63	119.2	1479.05
119.3	2537.34	119.2	632.505	119.3	2276.87	119.3	1446.31	119.3	2297.24	119.4	1724.38	119.3	2332	119.3	1227.72	119.3	1479.17
119.4	2537.51	119.3	632.585	119.4	2277	119.4	1446.43	119.4	2297.37	119.5	1724.53	119.4	2332.15	119.4	1227.8	119.4	1479.26
119.5	2537.64	119.4	632.66	119.5	2277.13	119.5	1446.55	119.5	2297.51	119.6	1724.67	119.5	2332.28	119.5	1227.9	119.5	1479.38
119.6	2537.77	119.5	632.742	119.6	2277.24	119.6	1446.68	119.6	2297.65	119.7	1724.76	119.6	2332.43	119.6	1228	119.6	1479.49
119.7	2537.92	119.6	632.827	119.7	2277.35	119.7	1446.8	119.7	2297.78	119.8	1724.87	119.7	2332.56	119.7	1228.1	119.7	1479.59
119.8	2538.07	119.7	632.927	119.8	2277.48	119.8	1446.91	119.8	2297.92	119.9	1724.97	119.8	2332.68	119.8	1228.17	119.8	1479.68
119.9	2538.2	119.8	633.007	119.9	2277.62	119.9	1447.03	119.9	2298.04	120	1725.08	119.9	2332.8	119.9	1228.23	119.9	1479.77
120	2538.33	119.9	633.09	120	2277.75	120	1447.18	120	2298.15	120.1	1725.19	120	2332.93	120	1228.35	120	1479.88
120.1	2538.47	120	633.155	120.1	2277.9	120.1	1447.32	120.1	2298.26	120.2	1725.31	120.1	2333.07	120.1	1228.44	120.1	1479.97
120.2	2538.62	120.1	633.223	120.2	2278.03	120.2	1447.45	120.2	2298.39	120.3	1725.42	120.2	2333.22	120.2	1228.54	120.2	1480.09
120.3	2538.75	120.2	633.32	120.3	2278.19	120.3	1447.59	120.3	2298.5	120.4	1725.51	120.3	2333.36	120.3	1228.69	120.3	1480.21
120.4	2538.87	120.3	633.383	120.4	2278.31	120.4	1447.73	120.4	2298.62	120.5	1725.64	120.4	2333.51	120.4	1228.84	120.4	1480.31
120.5	2538.95	120.4	633.492	120.5	2278.46	120.5	1447.87	120.5	2298.73	120.6	1725.75	120.5	2333.64	120.5	1228.94	120.5	1480.41
120.6	2539.09	120.5	633.566	120.6	2278.62	120.6	1447.98	120.6	2298.85	120.7	1725.86	120.6	2333.79	120.6	1229.06	120.6	1480.5
120.7	2539.18	120.6	633.652	120.7	2278.75	120.7	1448.13	120.7	2298.95	120.8	1725.95	120.7	2333.93	120.7	1229.18	120.7	1480.6
120.8	2539.27	120.7	633.723	120.8	2278.86	120.8	1448.26	120.8	2299.12	120.9	1726.03	120.8	2334.06	120.8	1229.32	120.8	1480.7
120.9	2539.38	120.8	633.781	120.9	2278.99	120.9	1448.41	120.9	2299.29	121	1726.13	120.9	2334.21	120.9	1229.43	120.9	1480.78
121	2539.49	120.9	633.847	121	2279.13	121	1448.55	121	2299.44	121.1	1726.25	121	2334.34	121	1229.52	121	1480.91
121.1	2539.62	121	633.922	121.1	2279.26	121.1	1448.68	121.1	2299.53	121.2	1726.33	121.1	2334.47	121.1	1229.62	121.1	1480.99
121.2	2539.7	121.1	634.003	121.2	2279.32	121.2	1448.82	121.2	2299.66	121.3	1726.42	121.2	2334.6	121.2	1229.72	121.2	1481.09
121.3	2539.83	121.2	634.09	121.3	2279.46	121.3	1448.96	121.3	2299.8	121.4	1726.49	121.3	2334.74	121.3	1229.8	121.3	1481.19
121.4	2539.99	121.3	634.165	121.4	2279.56	121.4	1449.1	121.4	2299.95	121.5	1726.57	121.4	2334.87	121.4	1229.92	121.4	1481.28
121.5	2540.11	121.4	634.257	121.5	2279.67	121.5	1449.23	121.5	2300.1	121.6	1726.69	121.5	2335	121.5	1230.03	121.5	1481.41
121.6	2540.27	121.5	634.32	121.6	2279.78	121.6	1449.36	121.6	2300.25	121.7	1726.8	121.6	2335.15	121.6	1230.12	121.6	1481.52
121.7	2540.4	121.6	634.413	121.7	2279.89	121.7	1449.49	121.7	2300.4	121.8	1726.93	121.7	2335.26	121.7	1230.19	121.7	1481.61
121.8	2540.57	121.7	634.485	121.8	2279.98	121.8	1449.63	121.8	2300.53	121.9	1727.03	121.8	2335.4	121.8	1230.27	121.8	1481.69
121.9	2540.66	121.8	634.566	121.9	2280.09	121.9	1449.77	121.9	2300.68	122	1727.13	121.9	2335.5	121.9	1230.37	121.9	1481.8
122	2540.79	121.9	634.66	122	2280.21	122	1449.9	122	2300.83	122.1	1727.22	122	2335.63	122	1230.47	122	1481.92
122.1	2540.93	122	634.766	122.1	2280.35	122.1	1450.04	122.1	2300.98	122.2	1727.34	122.1	2335.77	122.1	1230.55	122.1	1482.02
122.2	2541.05	122.1	634.847	122.2	2280.49	122.2	1450.18	122.2	2301.12	122.3	1727.46	122.2	2335.92	122.2	1230.63	122.2	1482.12
122.3	2541.18	122.2	634.922	122.3	2280.63	122.3	1450.33	122.3	2301.28	122.4	1727.56	122.3	2336.04	122.3	1230.68	122.3	1482.2
122.4	2541.29	122.3	634.992	122.4	2280.75	122.4	1450.48	122.4	2301.43	122.5	1727.69	122.4	2336.17	122.4	1230.76	122.4	1482.29
122.5	2541.4	122.4	635.063	122.5	2280.86	122.5	1450.61	122.5	2301.53	122.6	1727.79	122.5	2336.29	122.5	1230.84	122.5	1482.4
122.6	2541.52	122.5	635.155	122.6	2281.01	122.6	1450.77	122.6	2301.59	122.7	1727.9	122.6	2336.4	122.6	1230.91	122.6	1482.46
122.7	2541.63	122.6	635.247	122.7	2281.14	122.7	1450.9	122.7	2301.68	122.8	1728.01	122.7	2336.52	122.7	1230.96	122.7	1482.57
122.8	2541.74	122.7	635.313	122.8	2281.26	122.8	1451.06	122.8	2301.76	122.9	1728.1	122.8	2336.64	122.8	1231.06	122.8	1482.68
122.9	2541.85	122.8	635.381	122.9	2281.4	122.9	1451.21	122.9	2301.86	123	1728.2	122.9	2336.76	122.9	1231.14	122.9	1482.79
123	2541.98	122.9	635.441	123	2281.54	123	1451.36	123	2301.94	123.1	1728.29	123	2336.91	123	1231.2	123	1482.88
123.1	2542.09	123	635.5	123.1	2281.66	123.1	1451.52	123.1	2302.12	123.2	1728.41	123.1	2337.01	123.1	1231.25	123.1	1482.95
123.2	2542.2	123.1	635.567	123.2	2281.76	123.2	1451.67	123.2	2302.39	123.3	1728.5	123.2	2337.09	123.2	1231.33	123.2	1483.04
123.3	2542.31	123.2	635.662	123.3	2281.86	123.3	1451.82	123.3	2302.45	123.4	1728.6	123.3	2337.19	123.3	1231.39	123.3	1483.12
123.4	2542.41	123.3	635.735	123.4	2281.97	123.4	1451.95	123.4	2302.58	123.5	1728.71	123.4	2337.3	123.4	1231.5	123.4	1483.22
123.5	2542.53	123.4	635.813	123.5	2282.08	123.5	1452.08	123.5	2302.75	123.6	1728.79	123.5	2337.41	123.5	1231.56	123.5	1483.3
123.6	2542.65	123.5	635.894	123.6	2282.19	123.6	1452.22	123.6	2302.93	123.7	1728.87	123.6	2337.5	123.6	1231.62	123.6	1483.4
123.7	2542.76	123.6	635.966	123.7	2282.28	123.7	1452.35	123.7	2303.05	123.8	1728.95	123.7	2337.59	123.7	1231.69	123.7	1483.49
123.8	2542.86	123.7	636.027	123.8	2282.41	123.8	1452.47	123.8	2303.19	123.9	1729.07	123.8	2337.66	123.8	1231.79	123.8	1483.59
123.9	2542.96	123.8	636.109	123.9	2282.52	123.9	1452.58	123.9	2303.27	124	1729.17	123.9	2337.76	123.9	1231.84	123.9	1483.67
124	2543.07	123.9	636.187	124	2282.66	124	1452.69	124	2303.33	124.1	1729.26	124	2337.92	124	1231.92	124	1483.76
124.1	2543.18	124	636.25	124.1	2282.76	124.1	1452.8	124.1	2303.44	124.2	1729.37	124.1	2338.05	124.1	1232	124.1	1483.84
124.2	2543.28	124.1	636.337	124.2	2282.87	124.2	1452.91	124.2	2303.51	124.3	1729.47	124.2	2338.16	124.2	1232.07	124.2	1483.93
124.3	2543.38	124.2	636.386	124.3	2282.96	124.3	1453.02	124.3	2303.6	124.4	1729.56	124.3	2338.25	124.3	1232.14	124.3	1484.01
124.4	2543.47	124.3	636.454	124.4	2283.08	124.4	1453.12	124.4	2303.7	124.5	1729.65	124.4	2338.36	124.4	1232.22	124.4	1484.1
124.5	2543.57	124.4	636.523	124.5	2283.18	124.5	1453.2	124.5	2303.8	124.6	1729.74	124.5	2338.46	124.5	1232.3	124.5	1484.17
124.6	2543.68	124.5	636.597	124.6	2283.28	124.6	1453.32	124.6	2303.9	124.7	1729.82	124.6	2338.58	124.6	1232.39	124.6	1484.28
124.7	2543.77	124.6	636.655	124.7	2283.41	124.7	1453.47	124.7	2303.97	124.8	1729.93	124.7	2338.7	124.7	1232.47	124.7	1484.34
124.8	2543.85	124.7	636.716	124.8	2283.5	124.8	1453.58	124.8	2304.06	124.9	1730.02	124.8	2338.81	124.8	1232.54	124.8	1484.41
124.9	2543.96	124.8	636.793	124.9	2283.57	124.9	1453.71	124.9	2304.14	125	1730.09	124.9	2338.91	124.9	1232.62	124.9	1484.47
125	2544.07	124.9	636.855	125	2283.66	125	1453.85	125	2304.24	125.1	1730.17	125	2339.02	125	1232.69	125	1484.57
125.1	2544.16	125	636.907	125.1	2283.75	125.1	1454	125.1	2304.32	125.2	1730.26	125.1	2339.13	125.1	1232.77	125.1	1484.65
125.2	2544.25	125.1	636.976	125.2	2283.84	125.2	1454.15	125.2	2304.4	125.3	1730.34	125.2	2339.24	125.2	1232.84	125.2	1484.7
125.3	2544.37	125.2	637.027	125.3	2283.91	125.3	1454.3	125.3	2304.49	125.4	1730.43	125.3	2339.36	125.3	1232.91	125.3	1484.77
125.4	2544.48	125.3	637.095	125.4	2284.01	125.4	1454.4	125.4	2304.55	125.5	1730.5	125.4	2339.49	125.4	1232.99	125.4	1484.84
125.5	2544.57	125.4	637.133	125.5	2284.1	125.5	1454.49	125.5	2304.62	125.6	1730.58	125.5	2339.56	125.5	1233.06	125.5	1484.91
125.6	2544.68	125.5	637.155	125.6	2284.19	125.6	1454.6	125.6	2304.68	125.7	1730.66	125.6	2339.64	125.6	1233.11	125.6	1485
125.7	2544.77	125.6	637.18	125.7	2284.28	125.7	1454.72	125.7	2304.76	125.8	1730.73	125.7	2339.74	125.7	1233.18	125.7	1485.05
125.8	2544.89	125.7	637.219	125.8	2284.35	125.8	1454.85	125.8	2304.86	125.9	1730.81	125.8	2339.85	125.8	1233.27	125.8	1485.13
125.9	2545	125.8	637.281	125.9	2284.45	125.9	1454.97	125.9	2304.94	126	1730.89	125.9	2339.94	125.9	1233.35	125.9	1485.2
126	2545.09	125.9	637.316	126	2284.51	126	1455.08	126	2305.02	126.1	1730.94	126	2340.02	126	1233.4	126	1485.25
126.1	2545.16	126	637.345	126.1	2284.6	126.1	1455.2	126.1	2305.09	126.2	1731	126.1	2340.12	126.1	1233.48	126.1	1485.3
126.2	2545.25	126.1	637.394	126.2	2284.66	126.2	1455.3	126.2	2305.17	126.3	1731.07	126.2	2340.2	126.2	1233.52	126.2	1485.36
126.3	2545.33	126.2	637.434	126.3	2284.74	126.3	1455.41	126.3	2305.24	126.4	1731.12	126.3	2340.27	126.3	1233.6	126.3	1485.43
126.4	2545.41	126.3	637.456	126.4	2284.84	126.4	1455.51	126.4	2305.3	126.5	1731.15	126.4	2340.33	126.4	1233.63	126.4	1485.47
126.5	2545.47	126.4	637.512	126.5	2284.92	126.5	1455.63	126.5	2305.38	126.6	1731.21	126.5	2340.42	126.5	1233.69	126.5	1485.52
126.6	2545.55	126.5	637.559	126.6	2284.99	126.6	1455.72	126.6	2305.46	126.7	1731.28	126.6	2340.51	126.6	1233.76	126.6	1485.58
126.7	2545.6	126.6	637.638	126.7	2285.05	126.7	1455.81	126.7	2305.52	126.8	1731.34	126.7	2340.59	126.7	1233.82	126.7	1485.62
126.8	2545.66	126.7	637.698	126.8	2285.11	126.8	1455.86	126.8	2305.6	126.9	1731.39	126.8	2340.64	126.8	1233.9	126.8	1485.68
126.9	2545.71	126.8	637.75	126.9	2285.16	126.9	1455.94	126.9	2305.68	127	1731.41	126.9	2340.69	126.9	1233.92	126.9	1485.72
127	2545.77	126.9	637.777	127	2285.2	127	1456	127	2305.73	127.1	1731.46	127	2340.74	127	1233.94	127	1485.79
127.1	2545.84	127	637.825	127.1	2285.29	127.1	1456.07	127.1	2305.82	127.2	1731.51	127.1	2340.8	127.1	1233.99	127.1	1485.85
127.2	2545.91	127.1	637.871	127.2	2285.33	127.2	1456.15	127.2	2305.89	127.3	1731.54	127.2	2340.84	127.2	1234.03	127.2	1485.91
127.3	2545.99	127.2	637.902	127.3	2285.4	127.3	1456.2	127.3	2305.99	127.4	1731.6	127.3	2340.9	127.3	1234.09	127.3	1485.96
127.4	2546.06	127.3	637.941	127.4	2285.47	127.4	1456.3	127.4	2306.09	127.5	1731.63	127.4	2340.96	127.4	1234.13	127.4	1486.02
127.5	2546.11	127.4	638.007	127.5	2285.54	127.5	1456.42	127.5	2306.17	127.6	1731.7	127.5	2340.98	127.5	1234.2	127.5	1486.06
127.6	2546.18	127.5	638.055	127.6	2285.59	127.6	1456.5	127.6	2306.24	127.7	1731.72	127.6	2341.01	127.6	1234.26	127.6	1486.1
127.7	2546.24	127.6	638.097	127.7	2285.66	127.7	1456.59	127.7	2306.32	127.8	1731.74	127.7	2341.08	127.7	1234.29	127.7	1486.13
127.8	2546.31	127.7	638.136	127.8	2285.72	127.8	1456.68	127.8	2306.41	127.9	1731.78	127.8	2341.13	127.8	1234.35	127.8	1486.17
127.9	2546.34	127.8	638.173	127.9	2285.8	127.9	1456.79	127.9	2306.46	128	1731.81	127.9	2341.22	127.9	1234.39	127.9	1486.21
128	2546.4	127.9	638.226	128	2285.84	128	1456.87	128	2306.5	128.1	1731.84	128	2341.3	128	1234.41	128	1486.26
128.1	2546.43	128	638.266	128.1	2285.9	128.1	1456.95	128.1	2306.57	128.2	1731.88	128.1	2341.36	128.1	1234.46	128.1	1486.31
128.2	2546.47	128.1	638.284	128.2	2285.96	128.2	1457.06	128.2	2306.63	128.3	1731.89	128.2	2341.42	128.2	1234.52	128.2	1486.33
128.3	2546.53	128.2	638.32	128.3	2286.01	128.3	1457.16	128.3	2306.69	128.4	1731.92	128.3	2341.46	128.3	1234.58	128.3	1486.36
128.4	2546.58	128.3	638.345	128.4	2286.08	128.4	1457.26	128.4	2306.74	128.5	1731.94	128.4	2341.52	128.4	1234.63	128.4	1486.42
128.5	2546.6	128.4	638.386	128.5	2286.14	128.5	1457.35	128.5	2306.79	128.6	1731.97	128.5	2341.59	128.5	1234.7	128.5	1486.44
128.6	2546.64	128.5	638.427	128.6	2286.19	128.6	1457.42	128.6	2306.83	128.7	1732	128.6	2341.66	128.6	1234.77	128.6	1486.48
128.7	2546.65	128.6	638.468	128.7	2286.23	128.7	1457.52	128.7	2306.88	128.8	1732.05	128.7	2341.72	128.7	1234.83	128.7	1486.5
128.8	2546.68	128.7	638.495	128.8	2286.28	128.8	1457.63	128.8	2306.93	128.9	1732.07	128.8	2341.77	128.8	1234.88	128.8	1486.52
128.9	2546.73	128.8	638.524	128.9	2286.32	128.9	1457.71	128.9	2306.98	129	1732.11	128.9	2341.8	128.9	1234.93	128.9	1486.54
129	2546.77	128.9	638.546	129	2286.37	129	1457.81	129	2307.06	129.1	1732.14	129	2341.85	129	1235	129	1486.56
129.1	2546.82	129	638.575	129.1	2286.41	129.1	1457.91	129.1	2307.12	129.2	1732.17	129.1	2341.9	129.1	1235.06	129.1	1486.6
129.2	2546.88	129.1	638.609	129.2	2286.46	129.2	1458	129.2	2307.19	129.3	1732.2	129.2	2341.94	129.2	1235.12	129.2	1486.63
129.3	2546.93	129.2	638.655	129.3	2286.5	129.3	1458.08	129.3	2307.25	129.4	1732.24	129.3	2342.01	129.3	1235.17	129.3	1486.65
129.4	2546.97	129.3	638.684	129.4	2286.54	129.4	1458.17	129.4	2307.28	129.5	1732.28	129.4	2342.07	129.4	1235.24	129.4	1486.67
129.5	2547	129.4	638.711	129.5	2286.59	129.5	1458.25	129.5	2307.32	129.6	1732.32	129.5	2342.14	129.5	1235.3	129.5	1486.67
129.6	2547.04	129.5	638.737	129.6	2286.63	129.6	1458.33	129.6	2307.37	129.7	1732.36	129.6	2342.22	129.6	1235.36	129.6	1486.66
129.7	2547.07	129.6	638.77	129.7	2286.69	129.7	1458.43	129.7	2307.41	129.8	1732.39	129.7	2342.29	129.7	1235.42	129.7	1486.68
129.8	2547.11	129.7	638.813	129.8	2286.75	129.8	1458.52	129.8	2307.45	129.9	1732.43	129.8	2342.38	129.8	1235.49	129.8	1486.69
129.9	2547.16	129.8	638.828	129.9	2286.8	129.9	1458.59	129.9	2307.51	130	1732.46	129.9	2342.46	129.9	1235.55	129.9	1486.69
130	2547.2	129.9	638.874	130	2286.86	130	1458.68	130	2307.55	130.1	1732.49	130	2342.53	130	1235.59	130	1486.7
130.1	2547.24	130	638.895	130.1	2286.92	130.1	1458.73	130.1	2307.58	130.2	1732.51	130.1	2342.59	130.1	1235.65	130.1	1486.72
130.2	2547.29	130.1	638.925	130.2	2286.98	130.2	1458.81	130.2	2307.62	130.3	1732.54	130.2	2342.65	130.2	1235.72	130.2	1486.74
130.3	2547.33	130.2	638.966	130.3	2287.03	130.3	1458.88	130.3	2307.64	130.4	1732.58	130.3	2342.72	130.3	1235.76	130.3	1486.76
130.4	2547.38	130.3	638.995	130.4	2287.08	130.4	1458.96	130.4	2307.64	130.5	1732.59	130.4	2342.76	130.4	1235.81	130.4	1486.77
130.5	2547.41	130.4	639.036	130.5	2287.13	130.5	1459.04	130.5	2307.68	130.6	1732.63	130.5	2342.81	130.5	1235.85	130.5	1486.78
130.6	2547.45	130.5	639.082	130.6	2287.19	130.6	1459.11	130.6	2307.7	130.7	1732.66	130.6	2342.86	130.6	1235.9	130.6	1486.8
130.7	2547.48	130.6	639.116	130.7	2287.21	130.7	1459.16	130.7	2307.71	130.8	1732.68	130.7	2342.88	130.7	1235.94	130.7	1486.81
130.8	2547.5	130.7	639.144	130.8	2287.26	130.8	1459.24	130.8	2307.74	130.9	1732.72	130.8	2342.92	130.8	1235.97	130.8	1486.82
130.9	2547.53	130.8	639.165	130.9	2287.3	130.9	1459.32	130.9	2307.76	131	1732.74	130.9	2342.97	130.9	1236.02	130.9	1486.85
131	2547.54	130.9	639.191	131	2287.34	131	1459.41	131	2307.78	131.1	1732.77	131	2343.01	131	1236.08	131	1486.87
131.1	2547.58	131	639.211	131.1	2287.34	131.1	1459.47	131.1	2307.79	131.2	1732.79	131.1	2343.06	131.1	1236.14	131.1	1486.87
131.2	2547.61	131.1	639.245	131.2	2287.39	131.2	1459.56	131.2	2307.82	131.3	1732.8	131.2	2343.12	131.2	1236.2	131.2	1486.88
131.3	2547.64	131.2	639.286	131.3	2287.41	131.3	1459.64	131.3	2307.83	131.4	1732.82	131.3	2343.18	131.3	1236.27	131.3	1486.9
131.4	2547.66	131.3	639.327	131.4	2287.45	131.4	1459.73	131.4	2307.85	131.5	1732.84	131.4	2343.22	131.4	1236.33	131.4	1486.92
131.5	2547.69	131.4	639.359	131.5	2287.47	131.5	1459.82	131.5	2307.85	131.6	1732.87	131.5	2343.28	131.5	1236.39	131.5	1486.94
131.6	2547.72	131.5	639.41	131.6	2287.5	131.6	1459.9	131.6	2307.87	131.7	1732.91	131.6	2343.31	131.6	1236.46	131.6	1486.98
131.7	2547.75	131.6	639.456	131.7	2287.5	131.7	1460	131.7	2307.88	131.8	1732.93	131.7	2343.35	131.7	1236.51	131.7	1487
131.8	2547.77	131.7	639.493	131.8	2287.51	131.8	1460.13	131.8	2307.9	131.9	1732.97	131.8	2343.41	131.8	1236.56	131.8	1487.03
131.9	2547.79	131.8	639.534	131.9	2287.55	131.9	1460.21	131.9	2307.94	132	1733	131.9	2343.47	131.9	1236.62	131.9	1487.04
132	2547.82	131.9	639.555	132	2287.58	132	1460.29	132	2307.96	132.1	1733.04	132	2343.53	132	1236.67	132	1487.05
132.1	2547.84	132	639.585	132.1	2287.6	132.1	1460.39	132.1	2308	132.2	1733.08	132.1	2343.56	132.1	1236.72	132.1	1487.05
132.2	2547.88	132.1	639.606	132.2	2287.6	132.2	1460.49	132.2	2308.02	132.3	1733.11	132.2	2343.63	132.2	1236.75	132.2	1487.07
132.3	2547.9	132.2	639.628	132.3	2287.62	132.3	1460.59	132.3	2308.05	132.4	1733.13	132.3	2343.65	132.3	1236.82	132.3	1487.09
132.4	2547.93	132.3	639.657	132.4	2287.64	132.4	1460.69	132.4	2308.09	132.5	1733.15	132.4	2343.68	132.4	1236.85	132.4	1487.09
132.5	2547.95	132.4	639.687	132.5	2287.67	132.5	1460.78	132.5	2308.14	132.6	1733.18	132.5	2343.74	132.5	1236.9	132.5	1487.11
132.6	2547.97	132.5	639.714	132.6	2287.67	132.6	1460.88	132.6	2308.18	132.7	1733.21	132.6	2343.78	132.6	1236.97	132.6	1487.13
132.7	2547.98	132.6	639.743	132.7	2287.7	132.7	1460.98	132.7	2308.21	132.8	1733.24	132.7	2343.86	132.7	1237.01	132.7	1487.14
132.8	2548.01	132.7	639.784	132.8	2287.71	132.8	1461.09	132.8	2308.25	132.9	1733.28	132.8	2343.9	132.8	1237.05	132.8	1487.15
132.9	2548.03	132.8	639.817	132.9	2287.74	132.9	1461.17	132.9	2308.28	133	1733.31	132.9	2343.95	132.9	1237.1	132.9	1487.17
133	2548.05	132.9	639.847	133	2287.75	133	1461.27	133	2308.32	133.1	1733.34	133	2344.01	133	1237.16	133	1487.17
133.1	2548.09	133	639.876	133.1	2287.8	133.1	1461.37	133.1	2308.38	133.2	1733.37	133.1	2344.06	133.1	1237.22	133.1	1487.18
133.2	2548.11	133.1	639.905	133.2	2287.84	133.2	1461.47	133.2	2308.43	133.3	1733.42	133.2	2344.1	133.2	1237.28	133.2	1487.2
133.3	2548.15	133.2	639.925	133.3	2287.85	133.3	1461.58	133.3	2308.47	133.4	1733.46	133.3	2344.12	133.3	1237.37	133.3	1487.23
133.4	2548.16	133.3	639.954	133.4	2287.89	133.4	1461.65	133.4	2308.48	133.5	1733.5	133.4	2344.18	133.4	1237.42	133.4	1487.24
133.5	2548.18	133.4	639.98	133.5	2287.9	133.5	1461.75	133.5	2308.52	133.6	1733.52	133.5	2344.22	133.5	1237.49	133.5	1487.25
133.6	2548.2	133.5	640.027	133.6	2287.93	133.6	1461.87	133.6	2308.56	133.7	1733.54	133.6	2344.24	133.6	1237.56	133.6	1487.27
133.7	2548.24	133.6	640.075	133.7	2287.96	133.7	1461.96	133.7	2308.6	133.8	1733.59	133.7	2344.28	133.7	1237.64	133.7	1487.28
133.8	2548.25	133.7	640.097	133.8	2287.99	133.8	1462.04	133.8	2308.61	133.9	1733.59	133.8	2344.33	133.8	1237.72	133.8	1487.28
133.9	2548.27	133.8	640.129	133.9	2288.02	133.9	1462.13	133.9	2308.63	134	1733.63	133.9	2344.36	133.9	1237.79	133.9	1487.28
134	2548.31	133.9	640.172	134	2288.05	134	1462.22	134	2308.66	134.1	1733.66	134	2344.4	134	1237.87	134	1487.29
134.1	2548.34	134	640.188	134.1	2288.09	134.1	1462.29	134.1	2308.68	134.2	1733.68	134.1	2344.41	134.1	1237.93	134.1	1487.3
134.2	2548.36	134.1	640.223	134.2	2288.12	134.2	1462.39	134.2	2308.71	134.3	1733.71	134.2	2344.44	134.2	1238.01	134.2	1487.32
134.3	2548.38	134.2	640.25	134.3	2288.16	134.3	1462.46	134.3	2308.75	134.4	1733.75	134.3	2344.49	134.3	1238.07	134.3	1487.32
134.4	2548.41	134.3	640.304	134.4	2288.2	134.4	1462.59	134.4	2308.81	134.5	1733.76	134.4	2344.54	134.4	1238.12	134.4	1487.32
134.5	2548.44	134.4	640.328	134.5	2288.23	134.5	1462.69	134.5	2308.82	134.6	1733.79	134.5	2344.57	134.5	1238.19	134.5	1487.34
134.6	2548.47	134.5	640.356	134.6	2288.25	134.6	1462.75	134.6	2308.85	134.7	1733.84	134.6	2344.64	134.6	1238.25	134.6	1487.34
134.7	2548.49	134.6	640.374	134.7	2288.3	134.7	1462.83	134.7	2308.86	134.8	1733.85	134.7	2344.69	134.7	1238.31	134.7	1487.35
134.8	2548.5	134.7	640.415	134.8	2288.32	134.8	1462.94	134.8	2308.87	134.9	1733.88	134.8	2344.73	134.8	1238.34	134.8	1487.35
134.9	2548.54	134.8	640.445	134.9	2288.34	134.9	1463.06	134.9	2308.88	135	1733.91	134.9	2344.76	134.9	1238.37	134.9	1487.36
135	2548.55	134.9	640.488	135	2288.37	135	1463.18	135	2308.91	135.1	1733.93	135	2344.79	135	1238.44	135	1487.39
135.1	2548.59	135	640.516	135.1	2288.41	135.1	1463.28	135.1	2308.92	135.2	1733.94	135.1	2344.83	135.1	1238.5	135.1	1487.4
135.2	2548.61	135.1	640.546	135.2	2288.43	135.2	1463.38	135.2	2308.94	135.3	1733.97	135.2	2344.87	135.2	1238.55	135.2	1487.42
135.3	2548.63	135.2	640.566	135.3	2288.45	135.3	1463.42	135.3	2308.97	135.4	1734	135.3	2344.92	135.3	1238.59	135.3	1487.42
135.4	2548.66	135.3	640.59	135.4	2288.48	135.4	1463.48	135.4	2309.01	135.5	1734.05	135.4	2344.96	135.4	1238.65	135.4	1487.43
135.5	2548.69	135.4	640.645	135.5	2288.5	135.5	1463.55	135.5	2309.02	135.6	1734.09	135.5	2345	135.5	1238.71	135.5	1487.44
135.6	2548.73	135.5	640.684	135.6	2288.52	135.6	1463.6	135.6	2309.05	135.7	1734.13	135.6	2345.05	135.6	1238.77	135.6	1487.44
135.7	2548.77	135.6	640.711	135.7	2288.56	135.7	1463.67	135.7	2309.08	135.8	1734.16	135.7	2345.09	135.7	1238.82	135.7	1487.44
135.8	2548.81	135.7	640.765	135.8	2288.57	135.8	1463.71	135.8	2309.11	135.9	1734.22	135.8	2345.13	135.8	1238.87	135.8	1487.46
135.9	2548.82	135.8	640.805	135.9	2288.59	135.9	1463.78	135.9	2309.13	136	1734.27	135.9	2345.2	135.9	1238.92	135.9	1487.47
136	2548.86	135.9	640.847	136	2288.62	136	1463.85	136	2309.16	136.1	1734.3	136	2345.25	136	1238.99	136	1487.49
136.1	2548.88	136	640.866	136.1	2288.64	136.1	1463.93	136.1	2309.2	136.2	1734.35	136.1	2345.31	136.1	1239.03	136.1	1487.49
136.2	2548.91	136.1	640.903	136.2	2288.66	136.2	1464.01	136.2	2309.24	136.3	1734.38	136.2	2345.36	136.2	1239.09	136.2	1487.5
136.3	2548.93	136.2	640.925	136.3	2288.69	136.3	1464.1	136.3	2309.27	136.4	1734.43	136.3	2345.42	136.3	1239.12	136.3	1487.5
136.4	2548.96	136.3	640.954	136.4	2288.71	136.4	1464.21	136.4	2309.28	136.5	1734.46	136.4	2345.47	136.4	1239.18	136.4	1487.5
136.5	2548.99	136.4	640.995	136.5	2288.73	136.5	1464.3	136.5	2309.29	136.6	1734.51	136.5	2345.54	136.5	1239.23	136.5	1487.51
136.6	2549.02	136.5	641.016	136.6	2288.75	136.6	1464.36	136.6	2309.32	136.7	1734.55	136.6	2345.58	136.6	1239.27	136.6	1487.52
136.7	2549.03	136.6	641.046	136.7	2288.78	136.7	1464.45	136.7	2309.35	136.8	1734.6	136.7	2345.63	136.7	1239.3	136.7	1487.54
136.8	2549.05	136.7	641.087	136.8	2288.79	136.8	1464.54	136.8	2309.39	136.9	1734.65	136.8	2345.68	136.8	1239.35	136.8	1487.55
136.9	2549.08	136.8	641.136	136.9	2288.82	136.9	1464.63	136.9	2309.42	137	1734.68	136.9	2345.74	136.9	1239.41	136.9	1487.56
137	2549.11	136.9	641.16	137	2288.84	137	1464.71	137	2309.46	137.1	1734.72	137	2345.76	137	1239.48	137	1487.57
137.1	2549.13	137	641.203	137.1	2288.86	137.1	1464.8	137.1	2309.46	137.2	1734.76	137.1	2345.8	137.1	1239.49	137.1	1487.57
137.2	2549.16	137.1	641.23	137.2	2288.89	137.2	1464.9	137.2	2309.48	137.3	1734.8	137.2	2345.84	137.2	1239.53	137.2	1487.58
137.3	2549.18	137.2	641.254	137.3	2288.91	137.3	1464.99	137.3	2309.51	137.4	1734.85	137.3	2345.89	137.3	1239.56	137.3	1487.6
137.4	2549.2	137.3	641.27	137.4	2288.94	137.4	1465.05	137.4	2309.54	137.5	1734.89	137.4	2345.91	137.4	1239.61	137.4	1487.61
137.5	2549.23	137.4	641.304	137.5	2288.95	137.5	1465.13	137.5	2309.55	137.6	1734.93	137.5	2345.96	137.5	1239.66	137.5	1487.62
137.6	2549.25	137.5	641.348	137.6	2288.97	137.6	1465.22	137.6	2309.58	137.7	1734.95	137.6	2345.98	137.6	1239.72	137.6	1487.63
137.7	2549.28	137.6	641.395	137.7	2289.01	137.7	1465.34	137.7	2309.6	137.8	1734.98	137.7	2345.99	137.7	1239.78	137.7	1487.65
137.8	2549.31	137.7	641.425	137.8	2289.02	137.8	1465.43	137.8	2309.61	137.9	1735	137.8	2346.02	137.8	1239.84	137.8	1487.67
137.9	2549.31	137.8	641.469	137.9	2289.04	137.9	1465.53	137.9	2309.64	138	1735.03	137.9	2346.06	137.9	1239.91	137.9	1487.68
138	2549.35	137.9	641.536	138	2289.07	138	1465.65	138	2309.66	138.1	1735.06	138	2346.08	138	1239.96	138	1487.68
138.1	2549.37	138	641.573	138.1	2289.09	138.1	1465.73	138.1	2309.69	138.2	1735.1	138.1	2346.12	138.1	1240.02	138.1	1487.69
138.2	2549.4	138.1	641.606	138.2	2289.1	138.2	1465.85	138.2	2309.71	138.3	1735.12	138.2	2346.16	138.2	1240.11	138.2	1487.71
138.3	2549.41	138.2	641.633	138.3	2289.14	138.3	1465.91	138.3	2309.73	138.4	1735.16	138.3	2346.18	138.3	1240.2	138.3	1487.71
138.4	2549.44	138.3	641.655	138.4	2289.16	138.4	1466.01	138.4	2309.74	138.5	1735.18	138.4	2346.23	138.4	1240.28	138.4	1487.72
138.5	2549.46	138.4	641.684	138.5	2289.2	138.5	1466.11	138.5	2309.75	138.6	1735.21	138.5	2346.27	138.5	1240.34	138.5	1487.73
138.6	2549.48	138.5	641.726	138.6	2289.23	138.6	1466.22	138.6	2309.77	138.7	1735.25	138.6	2346.29	138.6	1240.39	138.6	1487.73
138.7	2549.51	138.6	641.75	138.7	2289.25	138.7	1466.31	138.7	2309.79	138.8	1735.29	138.7	2346.33	138.7	1240.45	138.7	1487.74
138.8	2549.55	138.7	641.777	138.8	2289.26	138.8	1466.39	138.8	2309.8	138.9	1735.32	138.8	2346.36	138.8	1240.51	138.8	1487.74
138.9	2549.57	138.8	641.825	138.9	2289.28	138.9	1466.48	138.9	2309.81	139	1735.35	138.9	2346.41	138.9	1240.59	138.9	1487.75
139	2549.59	138.9	641.866	139	2289.31	139	1466.57	139	2309.84	139.1	1735.36	139	2346.47	139	1240.65	139	1487.76
139.1	2549.61	139	641.907	139.1	2289.34	139.1	1466.65	139.1	2309.85	139.2	1735.4	139.1	2346.52	139.1	1240.7	139.1	1487.79
139.2	2549.63	139.1	641.93	139.2	2289.37	139.2	1466.78	139.2	2309.87	139.3	1735.44	139.2	2346.57	139.2	1240.77	139.2	1487.8
139.3	2549.65	139.2	641.976	139.3	2289.42	139.3	1466.87	139.3	2309.9	139.4	1735.47	139.3	2346.61	139.3	1240.84	139.3	1487.81
139.4	2549.68	139.3	642.016	139.4	2289.45	139.4	1466.97	139.4	2309.92	139.5	1735.5	139.4	2346.65	139.4	1240.91	139.4	1487.83
139.5	2549.68	139.4	642.038	139.5	2289.48	139.5	1467.1	139.5	2309.94	139.6	1735.55	139.5	2346.68	139.5	1240.99	139.5	1487.84
139.6	2549.72	139.5	642.073	139.6	2289.5	139.6	1467.21	139.6	2309.96	139.7	1735.58	139.6	2346.74	139.6	1241.07	139.6	1487.85
139.7	2549.75	139.6	642.114	139.7	2289.53	139.7	1467.3	139.7	2309.98	139.8	1735.63	139.7	2346.8	139.7	1241.15	139.7	1487.84
139.8	2549.78	139.7	642.175	139.8	2289.57	139.8	1467.39	139.8	2310	139.9	1735.67	139.8	2346.86	139.8	1241.22	139.8	1487.85
139.9	2549.8	139.8	642.216	139.9	2289.59	139.9	1467.46	139.9	2310.02	140	1735.72	139.9	2346.91	139.9	1241.28	139.9	1487.87
140	2549.84	139.9	642.262	140	2289.62	140	1467.55	140	2310.03	140.1	1735.74	140	2346.95	140	1241.34	140	1487.88
140.1	2549.87	140	642.296	140.1	2289.65	140.1	1467.63	140.1	2310.06	140.2	1735.78	140.1	2346.99	140.1	1241.38	140.1	1487.89
140.2	2549.88	140.1	642.332	140.2	2289.66	140.2	1467.74	140.2	2310.07	140.3	1735.83	140.2	2347.03	140.2	1241.45	140.2	1487.9
140.3	2549.9	140.2	642.352	140.3	2289.7	140.3	1467.81	140.3	2310.09	140.4	1735.87	140.3	2347.06	140.3	1241.51	140.3	1487.91
140.4	2549.93	140.3	642.371	140.4	2289.73	140.4	1467.9	140.4	2310.12	140.5	1735.91	140.4	2347.09	140.4	1241.54	140.4	1487.93
140.5	2549.96	140.4	642.402	140.5	2289.77	140.5	1467.98	140.5	2310.14	140.6	1735.95	140.5	2347.15	140.5	1241.57	140.5	1487.95
140.6	2549.99	140.5	642.437	140.6	2289.79	140.6	1468.04	140.6	2310.16	140.7	1736	140.6	2347.17	140.6	1241.64	140.6	1487.97
140.7	2550.02	140.6	642.48	140.7	2289.81	140.7	1468.14	140.7	2310.18	140.8	1736.02	140.7	2347.21	140.7	1241.69	140.7	1487.99
140.8	2550.03	140.7	642.52	140.8	2289.82	140.8	1468.23	140.8	2310.18	140.9	1736.08	140.8	2347.24	140.8	1241.73	140.8	1488
140.9	2550.06	140.8	642.543	140.9	2289.83	140.9	1468.32	140.9	2310.2	141	1736.13	140.9	2347.27	140.9	1241.8	140.9	1488.01
141	2550.08	140.9	642.566	141	2289.84	141	1468.45	141	2310.23	141.1	1736.16	141	2347.3	141	1241.87	141	1488.03
141.1	2550.1	141	642.575	141.1	2289.88	141.1	1468.56	141.1	2310.25	141.2	1736.2	141.1	2347.33	141.1	1241.95	141.1	1488.04
141.2	2550.12	141.1	642.605	141.2	2289.89	141.2	1468.68	141.2	2310.28	141.3	1736.23	141.2	2347.38	141.2	1242.03	141.2	1488.05
141.3	2550.15	141.2	642.621	141.3	2289.92	141.3	1468.77	141.3	2310.31	141.4	1736.27	141.3	2347.4	141.3	1242.11	141.3	1488.07
141.4	2550.18	141.3	642.645	141.4	2289.93	141.4	1468.89	141.4	2310.32	141.5	1736.32	141.4	2347.44	141.4	1242.19	141.4	1488.08
141.5	2550.21	141.4	642.667	141.5	2289.94	141.5	1468.99	141.5	2310.34	141.6	1736.37	141.5	2347.48	141.5	1242.26	141.5	1488.09
141.6	2550.23	141.5	642.691	141.6	2289.97	141.6	1469.1	141.6	2310.36	141.7	1736.41	141.6	2347.5	141.6	1242.36	141.6	1488.12
141.7	2550.26	141.6	642.726	141.7	2290	141.7	1469.2	141.7	2310.36	141.8	1736.44	141.7	2347.54	141.7	1242.42	141.7	1488.13
141.8	2550.29	141.7	642.766	141.8	2290	141.8	1469.3	141.8	2310.38	141.9	1736.48	141.8	2347.58	141.8	1242.52	141.8	1488.16
141.9	2550.31	141.8	642.816	141.9	2290.02	141.9	1469.41	141.9	2310.4	142	1736.52	141.9	2347.64	141.9	1242.62	141.9	1488.18
142	2550.34	141.9	642.852	142	2290.03	142	1469.52	142	2310.43	142.1	1736.56	142	2347.69	142	1242.71	142	1488.19
142.1	2550.36	142	642.876	142.1	2290.04	142.1	1469.62	142.1	2310.43	142.2	1736.59	142.1	2347.72	142.1	1242.8	142.1	1488.21
142.2	2550.39	142.1	642.917	142.2	2290.06	142.2	1469.68	142.2	2310.46	142.3	1736.63	142.2	2347.77	142.2	1242.88	142.2	1488.24
142.3	2550.4	142.2	642.941	142.3	2290.09	142.3	1469.76	142.3	2310.48	142.4	1736.67	142.3	2347.82	142.3	1242.95	142.3	1488.25
142.4	2550.43	142.3	642.988	142.4	2290.13	142.4	1469.86	142.4	2310.49	142.5	1736.68	142.4	2347.86	142.4	1243.03	142.4	1488.27
142.5	2550.47	142.4	643.034	142.5	2290.17	142.5	1469.95	142.5	2310.52	142.6	1736.71	142.5	2347.9	142.5	1243.11	142.5	1488.28
142.6	2550.49	142.5	643.075	142.6	2290.2	142.6	1470.04	142.6	2310.55	142.7	1736.74	142.6	2347.92	142.6	1243.18	142.6	1488.3
142.7	2550.52	142.6	643.129	142.7	2290.24	142.7	1470.15	142.7	2310.58	142.8	1736.79	142.7	2347.97	142.7	1243.27	142.7	1488.31
142.8	2550.54	142.7	643.175	142.8	2290.29	142.8	1470.24	142.8	2310.62	142.9	1736.82	142.8	2348.01	142.8	1243.36	142.8	1488.33
142.9	2550.56	142.8	643.199	142.9	2290.3	142.9	1470.33	142.9	2310.63	143	1736.85	142.9	2348.07	142.9	1243.43	142.9	1488.36
143	2550.58	142.9	643.234	143	2290.32	143	1470.42	143	2310.66	143.1	1736.87	143	2348.11	143	1243.48	143	1488.38
143.1	2550.61	143	643.274	143.1	2290.36	143.1	1470.52	143.1	2310.7	143.2	1736.89	143.1	2348.18	143.1	1243.54	143.1	1488.39
143.2	2550.64	143.1	643.296	143.2	2290.39	143.2	1470.6	143.2	2310.73	143.3	1736.94	143.2	2348.25	143.2	1243.59	143.2	1488.42
143.3	2550.66	143.2	643.345	143.3	2290.43	143.3	1470.71	143.3	2310.75	143.4	1736.97	143.3	2348.3	143.3	1243.65	143.3	1488.43
143.4	2550.68	143.3	643.379	143.4	2290.47	143.4	1470.82	143.4	2310.79	143.5	1737	143.4	2348.33	143.4	1243.73	143.4	1488.43
143.5	2550.7	143.4	643.417	143.5	2290.49	143.5	1470.93	143.5	2310.82	143.6	1737.02	143.5	2348.38	143.5	1243.8	143.5	1488.44
143.6	2550.72	143.5	643.446	143.6	2290.51	143.6	1471.01	143.6	2310.85	143.7	1737.06	143.6	2348.44	143.6	1243.85	143.6	1488.47
143.7	2550.76	143.6	643.492	143.7	2290.56	143.7	1471.1	143.7	2310.87	143.8	1737.1	143.7	2348.52	143.7	1243.89	143.7	1488.49
143.8	2550.79	143.7	643.527	143.8	2290.57	143.8	1471.2	143.8	2310.92	143.9	1737.13	143.8	2348.58	143.8	1243.94	143.8	1488.49
143.9	2550.81	143.8	643.559	143.9	2290.61	143.9	1471.27	143.9	2310.95	144	1737.17	143.9	2348.61	143.9	1243.98	143.9	1488.51
144	2550.82	143.9	643.602	144	2290.66	144	1471.34	144	2310.98	144.1	1737.2	144	2348.64	144	1244.03	144	1488.52
144.1	2550.84	144	643.644	144.1	2290.67	144.1	1471.43	144.1	2311	144.2	1737.24	144.1	2348.67	144.1	1244.1	144.1	1488.54
144.2	2550.86	144.1	643.665	144.2	2290.7	144.2	1471.5	144.2	2311.03	144.3	1737.27	144.2	2348.69	144.2	1244.15	144.2	1488.55
144.3	2550.88	144.2	643.714	144.3	2290.73	144.3	1471.59	144.3	2311.07	144.4	1737.3	144.3	2348.7	144.3	1244.22	144.3	1488.56
144.4	2550.91	144.3	643.747	144.4	2290.76	144.4	1471.68	144.4	2311.09	144.5	1737.33	144.4	2348.74	144.4	1244.27	144.4	1488.58
144.5	2550.93	144.4	643.777	144.5	2290.76	144.5	1471.78	144.5	2311.11	144.6	1737.38	144.5	2348.78	144.5	1244.34	144.5	1488.6
144.6	2550.96	144.5	643.809	144.6	2290.81	144.6	1471.88	144.6	2311.13	144.7	1737.45	144.6	2348.81	144.6	1244.43	144.6	1488.62
144.7	2551	144.6	643.876	144.7	2290.85	144.7	1471.97	144.7	2311.16	144.8	1737.5	144.7	2348.86	144.7	1244.51	144.7	1488.64
144.8	2551.02	144.7	643.898	144.8	2290.88	144.8	1472.07	144.8	2311.19	144.9	1737.54	144.8	2348.91	144.8	1244.6	144.8	1488.66
144.9	2551.04	144.8	643.941	144.9	2290.89	144.9	1472.18	144.9	2311.2	145	1737.59	144.9	2348.95	144.9	1244.66	144.9	1488.66
145	2551.06	144.9	643.976	145	2290.93	145	1472.3	145	2311.23	145.1	1737.66	145	2349.02	145	1244.72	145	1488.68
145.1	2551.07	145	644.024	145.1	2290.94	145.1	1472.41	145.1	2311.23	145.2	1737.72	145.1	2349.09	145.1	1244.78	145.1	1488.69
145.2	2551.1	145.1	644.046	145.2	2290.97	145.2	1472.48	145.2	2311.24	145.3	1737.76	145.2	2349.15	145.2	1244.84	145.2	1488.71
145.3	2551.14	145.2	644.09	145.3	2291.01	145.3	1472.6	145.3	2311.26	145.4	1737.81	145.3	2349.21	145.3	1244.91	145.3	1488.72
145.4	2551.15	145.3	644.145	145.4	2291.03	145.4	1472.68	145.4	2311.27	145.5	1737.87	145.4	2349.27	145.4	1245	145.4	1488.74
145.5	2551.18	145.4	644.175	145.5	2291.07	145.5	1472.78	145.5	2311.31	145.6	1737.93	145.5	2349.32	145.5	1245.06	145.5	1488.75
145.6	2551.19	145.5	644.199	145.6	2291.1	145.6	1472.84	145.6	2311.34	145.7	1737.99	145.6	2349.36	145.6	1245.13	145.6	1488.76
145.7	2551.22	145.6	644.255	145.7	2291.12	145.7	1472.91	145.7	2311.36	145.8	1738.04	145.7	2349.42	145.7	1245.19	145.7	1488.76
145.8	2551.25	145.7	644.277	145.8	2291.16	145.8	1473.01	145.8	2311.37	145.9	1738.08	145.8	2349.47	145.8	1245.25	145.8	1488.76
145.9	2551.29	145.8	644.328	145.9	2291.18	145.9	1473.11	145.9	2311.38	146	1738.11	145.9	2349.53	145.9	1245.33	145.9	1488.78
146	2551.31	145.9	644.374	146	2291.22	146	1473.2	146	2311.41	146.1	1738.16	146	2349.54	146	1245.41	146	1488.81
146.1	2551.33	146	644.403	146.1	2291.25	146.1	1473.32	146.1	2311.44	146.2	1738.22	146.1	2349.58	146.1	1245.47	146.1	1488.82
146.2	2551.37	146.1	644.437	146.2	2291.27	146.2	1473.44	146.2	2311.46	146.3	1738.26	146.2	2349.61	146.2	1245.57	146.2	1488.85
146.3	2551.4	146.2	644.466	146.3	2291.28	146.3	1473.52	146.3	2311.49	146.4	1738.29	146.3	2349.66	146.3	1245.64	146.3	1488.86
146.4	2551.43	146.3	644.52	146.4	2291.32	146.4	1473.62	146.4	2311.51	146.5	1738.36	146.4	2349.73	146.4	1245.69	146.4	1488.89
146.5	2551.46	146.4	644.566	146.5	2291.36	146.5	1473.76	146.5	2311.54	146.6	1738.4	146.5	2349.79	146.5	1245.78	146.5	1488.91
146.6	2551.5	146.5	644.595	146.6	2291.4	146.6	1473.88	146.6	2311.57	146.7	1738.45	146.6	2349.84	146.6	1245.84	146.6	1488.94
146.7	2551.54	146.6	644.636	146.7	2291.44	146.7	1474.01	146.7	2311.6	146.8	1738.5	146.7	2349.88	146.7	1245.9	146.7	1488.97
146.8	2551.59	146.7	644.648	146.8	2291.48	146.8	1474.14	146.8	2311.64	146.9	1738.54	146.8	2349.94	146.8	1245.96	146.8	1488.98
146.9	2551.63	146.8	644.708	146.9	2291.52	146.9	1474.25	146.9	2311.68	147	1738.6	146.9	2350.01	146.9	1246.03	146.9	1489
147	2551.68	146.9	644.726	147	2291.55	147	1474.37	147	2311.71	147.1	1738.65	147	2350.05	147	1246.11	147	1489.01
147.1	2551.73	147	644.777	147.1	2291.6	147.1	1474.47	147.1	2311.74	147.2	1738.72	147.1	2350.1	147.1	1246.19	147.1	1489.02
147.2	2551.77	147.1	644.813	147.2	2291.64	147.2	1474.57	147.2	2311.76	147.3	1738.76	147.2	2350.14	147.2	1246.27	147.2	1489.07
147.3	2551.81	147.2	644.859	147.3	2291.68	147.3	1474.69	147.3	2311.78	147.4	1738.85	147.3	2350.21	147.3	1246.34	147.3	1489.11
147.4	2551.84	147.3	644.925	147.4	2291.72	147.4	1474.79	147.4	2311.83	147.5	1738.9	147.4	2350.24	147.4	1246.41	147.4	1489.13
147.5	2551.87	147.4	644.985	147.5	2291.76	147.5	1474.85	147.5	2311.85	147.6	1738.95	147.5	2350.29	147.5	1246.48	147.5	1489.18
147.6	2551.91	147.5	645.027	147.6	2291.79	147.6	1474.95	147.6	2311.88	147.7	1739.02	147.6	2350.35	147.6	1246.52	147.6	1489.19
147.7	2551.95	147.6	645.07	147.7	2291.83	147.7	1475.04	147.7	2311.91	147.8	1739.09	147.7	2350.4	147.7	1246.6	147.7	1489.22
147.8	2551.99	147.7	645.138	147.8	2291.86	147.8	1475.13	147.8	2311.93	147.9	1739.15	147.8	2350.46	147.8	1246.68	147.8	1489.26
147.9	2552.03	147.8	645.175	147.9	2291.91	147.9	1475.23	147.9	2311.96	148	1739.21	147.9	2350.51	147.9	1246.75	147.9	1489.29
148	2552.07	147.9	645.247	148	2291.93	148	1475.33	148	2312	148.1	1739.28	148	2350.56	148	1246.83	148	1489.31
148.1	2552.11	148	645.308	148.1	2291.98	148.1	1475.43	148.1	2312.02	148.2	1739.36	148.1	2350.63	148.1	1246.9	148.1	1489.33
148.2	2552.17	148.1	645.379	148.2	2292	148.2	1475.53	148.2	2312.05	148.3	1739.4	148.2	2350.68	148.2	1246.97	148.2	1489.39
148.3	2552.22	148.2	645.422	148.3	2292.03	148.3	1475.6	148.3	2312.08	148.4	1739.46	148.3	2350.77	148.3	1247.07	148.3	1489.41
148.4	2552.26	148.3	645.469	148.4	2292.06	148.4	1475.68	148.4	2312.13	148.5	1739.49	148.4	2350.83	148.4	1247.16	148.4	1489.44
148.5	2552.3	148.4	645.515	148.5	2292.09	148.5	1475.78	148.5	2312.16	148.6	1739.53	148.5	2350.91	148.5	1247.23	148.5	1489.48
148.6	2552.35	148.5	645.555	148.6	2292.13	148.6	1475.9	148.6	2312.19	148.7	1739.6	148.6	2350.97	148.6	1247.32	148.6	1489.5
148.7	2552.38	148.6	645.585	148.7	2292.16	148.7	1476.01	148.7	2312.24	148.8	1739.65	148.7	2351.04	148.7	1247.4	148.7	1489.54
148.8	2552.43	148.7	645.629	148.8	2292.2	148.8	1476.12	148.8	2312.26	148.9	1739.71	148.8	2351.11	148.8	1247.48	148.8	1489.57
148.9	2552.45	148.8	645.696	148.9	2292.23	148.9	1476.2	148.9	2312.3	149	1739.78	148.9	2351.17	148.9	1247.54	148.9	1489.6
149	2552.5	148.9	645.757	149	2292.26	149	1476.27	149	2312.34	149.1	1739.82	149	2351.24	149	1247.61	149	1489.59
149.1	2552.54	149	645.777	149.1	2292.3	149.1	1476.38	149.1	2312.39	149.2	1739.89	149.1	2351.3	149.1	1247.67	149.1	1489.61
[truncated: 6,914 more rows]
