# Supplementary material for: Mutational phospho-mimicry reveals a regulatory role for the XRCC4 and XLF C-terminal tails in modulating DNA bridging during classical non-homologous end joining
Source: eLife journal article supplement (doi:10.7554/elife.22900), 2017-05-13
Supplement: supp [file elife-22900-supp-v1.zip › elife_poa_e22900_Figure_8_source_data_5.txt.txt]

Combination	Equilibrium Binding	k_off_fast	Error k_off_fast	k_off_slow	Error k_off_slow
--	RU	s-1	s-1	s-1	s-1
X4-XLF_WT-WT	2582.22	0.036167453879522	9.82923795737474E-5	0.0071283432898826	2.53744052181372E-5
X4-XLF_Ala-WT	2388.38	0.0380436874546113	8.29293600178934E-5	0.00665648689623097	1.96729022331826E-5
X4-XLF_WT-Ala	2340.54	0.0346744971764358	7.69392911453632E-5	0.00652780640847054	1.86332834828951E-5
X4-XLF_Ala-Ala	2315.12	0.0383267213226687	7.87279402269845E-5	0.00667089938271223	1.69174848028981E-5
X4-XLF_Asp-WT	1778.89	0.0565940128853885	1.21945123623963E-4	0.00774551454949265	2.56487693532431E-5
X4-XLF_WT-Asp	1550.23	0.0694162514323344	2.22931860883448E-4	0.00789160675506943	3.28465339143193E-5
X4-XLF_Asp-Ala	1515.1	0.0476008185812458	8.36252770295639E-5	0.00707479440323584	2.11256281228418E-5
X4-XLF_Ala-Asp	1289.09	0.0791703377540713	2.23599012710561E-4	0.00884419892190224	3.48385959553125E-5
X4-XLF_Asp-Asp	666.699	0.161610062350115	7.58120199840825E-4	0.00742590746230914	3.98413490912889E-5
