# Supplementary material for: Mutational phospho-mimicry reveals a regulatory role for the XRCC4 and XLF C-terminal tails in modulating DNA bridging during classical non-homologous end joining
Source: eLife journal article supplement (doi:10.7554/elife.22900), 2017-05-13
Supplement: supp [file elife-22900-supp-v1.zip › elife_poa_e22900_Table_1_in_pdf_format_for_reviewers.pdf]

|                      | T<br>(°C) | 2-Me<br>(mM) | [XRCC4]<br>( $\mu$ M) | [XLF]<br>( $\mu$ M) | Ratio | N    | $K_a$<br>( $M^{-1}$ ) | $\Delta H^0$<br>(kcal/mol) | $K_d$<br>( $\mu$ M) | $-\Delta G^0$<br>(kcal/mol) | $-T\Delta S^0$<br>(kcal/mol) | Thermogram<br>shown in | Source<br>data | < $K_a$ ><br>( $\mu$ M) | < $\Delta H^0$ ><br>(kcal/mol) | < $-\Delta G^0$ ><br>(kcal/mol) | < $-T\Delta S^0$ ><br>(kcal/mol) |
|----------------------|-----------|--------------|-----------------------|---------------------|-------|------|-----------------------|----------------------------|---------------------|-----------------------------|------------------------------|------------------------|----------------|-------------------------|--------------------------------|---------------------------------|----------------------------------|
|                      |           |              | ITC cell              | ITC syringe         |       |      |                       |                            |                     |                             |                              |                        |                |                         |                                |                                 |                                  |
| XRCC4-wt<br>XLF-wt   | 10        | 10           | 17                    | 168                 | 10    | n.d. | n.d.                  | n.d.                       | n.d.                | n.d.                        | n.d.                         | Fig. 5 – Sup. 1A       | A              | 3.2 $\pm$ 0.8           | -2.4 $\pm$ 0.4                 | -7.5 $\pm$ 0.2                  | -5.2 $\pm$ 0.5                   |
|                      | 25        | 10           | 17                    | 168                 | 10    | 0.97 | 536000                | -1.7                       | 1.8                 | -7.8                        | -6.1                         | --                     | B              |                         |                                |                                 |                                  |
|                      | 25        | 10           | 33                    | 330                 | 10    | 0.91 | 306000                | -2.9                       | 3.2                 | -7.5                        | -4.6                         | Fig. 5 – Sup. 1B       | C              |                         |                                |                                 |                                  |
|                      | 25        | 10           | 25                    | 330                 | 13    | 0.84 | 222000                | -2.6                       | 4.5                 | -7.3                        | -4.7                         | --                     | D              |                         |                                |                                 |                                  |
|                      | 37        | 0            | 23                    | 300                 | 13    | 0.85 | 273000                | -6.0                       | 3.7                 | -7.7                        | -1.7                         | --                     | E              | 2.4 $\pm$ 0.7           | -7.1 $\pm$ 1                   | -8.0 $\pm$ 0.2                  | -1.0 $\pm$ 0.8                   |
|                      | 37        | 0            | 23                    | 300                 | 13    | 0.89 | 278000                | -4.9                       | 3.6                 | -7.7                        | -2.9                         | --                     | F              |                         |                                |                                 |                                  |
|                      | 37        | 0            | 12                    | 154                 | 13    | 0.92 | 848000                | -8.6                       | 1.2                 | -8.4                        | 0.2                          | Fig. 5A                | G              |                         |                                |                                 |                                  |
|                      | 37        | 0            | 12                    | 154                 | 13    | 0.84 | 760000                | -8.8                       | 1.3                 | -8.3                        | 0.4                          | --                     | H              |                         |                                |                                 |                                  |
| XRCC4-Ala<br>XLF-Ala | 25        | 10           | 25                    | 330                 | 13    | 1.21 | 300000                | -1.7                       | 3.3                 | -7.5                        | -5.8                         | Fig. 5 – Sup. 1C       | I              | 2.3 $\pm$ 0.4           | -5.8 $\pm$ 1.4                 | -8.0 $\pm$ 0.1                  | -2.2 $\pm$ 1.4                   |
|                      | 37        | 0            | 25                    | 325                 | 13    | 1.07 | 637000                | -3.1                       | 1.6                 | -8.2                        | -5.1                         | --                     | J              |                         |                                |                                 |                                  |
|                      | 37        | 0            | 25                    | 325                 | 13    | 1    | 343000                | -3.7                       | 2.9                 | -7.8                        | -4.1                         | --                     | K              |                         |                                |                                 |                                  |
|                      | 37        | 0            | 19                    | 250                 | 13    | 0.92 | 345000                | -8.4                       | 2.9                 | -7.8                        | 0.6                          | --                     | L              |                         |                                |                                 |                                  |
|                      | 37        | 0            | 19                    | 250                 | 13    | 0.92 | 582000                | -8.1                       | 1.7                 | -8.2                        | -0.1                         | Fig. 5B                | M              |                         |                                |                                 |                                  |
| XRCC4-Asp<br>XLF-Asp | 25        | 10           | 35                    | 350                 | 10    | 1.27 | 672000                | -0.9                       | 1.5                 | -7.9                        | -7.0                         | --                     | N              | 2.4 $\pm$ 0.4           | -3.7 $\pm$ 0.8                 | -8.0 $\pm$ 0.1                  | -4.3 $\pm$ 0.7                   |
|                      | 25        | 10           | 25                    | 330                 | 13    | 0.82 | 263000                | -1.2                       | 3.8                 | -7.4                        | -6.2                         | Fig. 5 – Sup. 1D       | O              |                         |                                |                                 |                                  |
|                      | 37        | 0            | 32                    | 416                 | 13    | 1.06 | 289000                | -2.4                       | 3.4                 | -7.8                        | -5.4                         | --                     | P              |                         |                                |                                 |                                  |
|                      | 37        | 0            | 32                    | 416                 | 13    | 0.95 | 425000                | -2.3                       | 2.4                 | -8.0                        | -5.7                         | --                     | Q              |                         |                                |                                 |                                  |
|                      | 37        | 0            | 19                    | 250                 | 13    | 0.88 | 566000                | -4.7                       | 1.8                 | -8.2                        | -3.5                         | Fig. 5C                | R              |                         |                                |                                 |                                  |
|                      | 37        | 0            | 17                    | 220                 | 13    | 0.85 | 538000                | -5.5                       | 1.8                 | -8.1                        | -2.6                         | --                     | S              |                         |                                |                                 |                                  |

2-Me stands for 2-Mercaptoethanol

Ratio indicates the titrant over analyte concentration ([XLF]/[XRCC4])

Source data specifies the column corresponding to each thermogram in Table 1 – source data 1

Last four columns report mean values  $\pm$  Standard Error of the Mean (SEM) from 4 experimental runs at 37 °C (grey cells) and 3 runs at 25 °C (white cells)

n.d. denotes no detectable heat transfer (at 10 °C)
