# Supplementary material for: Mutational phospho-mimicry reveals a regulatory role for the XRCC4 and XLF C-terminal tails in modulating DNA bridging during classical non-homologous end joining
Source: eLife journal article supplement (doi:10.7554/elife.22900), 2017-05-13
Supplement: supp [file elife-22900-supp-v1.zip › elife_poa_e22900_Table_1_source_data_1.txt.txt]

Time	A	Time	B	Time	C	Time	D	Time	E	Time	F	Time	G	Time	H	Time	I	Time	J	Time	K	Time	L	Time	M	Time	N	Time	O	Time	P	Time	Q	Time	R	Time	S
s	ucal/sec	s	ucal/sec	s	ucal/sec	s	ucal/sec	s	ucal/sec	s	ucal/sec	s	ucal/sec	s	ucal/sec	s	ucal/sec	s	ucal/sec	s	ucal/sec	s	ucal/sec	s	ucal/sec	s	ucal/sec	s	ucal/sec	s	ucal/sec	s	ucal/sec	s	ucal/sec	s	ucal/sec
5	-0.00204241224134538	5	-0.00112059998492242	5	0.00502868763839892	5	-5.37134771782632E-4	5	-0.00149997166336124	5	0.00164234060640389	5	5.82883191839301E-4	5	-0.00135827118558218	5	3.3673485881458E-4	5	0.0012636216379196	5	6.92451914442671E-4	5	-0.0021141506227087	5	0.00117825162935681	5	-0.00702077522402611	5	-6.78704956467158E-5	5	-0.00184387928591612	5	0.00507887996891032	5	3.06086730370581E-4	5	0.00673222806446638
6	-0.00142917743628246	6	-0.00173600383975181	6	0.00283407315761242	6	-4.03589323632048E-5	6	9.69582570551353E-5	6	5.08480877413398E-4	6	6.32621218273677E-4	6	4.86735361899804E-4	6	-9.48228776956661E-4	6	0.00121294563551544	6	3.24040390903058E-4	6	-6.89881222539768E-5	6	0.00184922910405128	6	-0.00180250706378882	6	-0.00128131753105176	6	-0.00233201652167292	6	0.00441943910118958	6	-4.49304621195523E-4	6	0.0067561518281618
7	-0.00119594263122025	7	-0.00139140769458113	7	0.001059458676826	7	-1.73583092943908E-4	7	1.83888177470948E-4	7	-7.9537885157599E-4	7	6.92359244707674E-4	7	0.00248174190938144	7	3.68075872732021E-5	7	0.00201226963311196	7	7.65628867363866E-4	7	2.86174378199888E-4	7	0.0024302065787456	7	4.25761096449762E-4	7	-0.00117476456645704	7	-0.00123015375743041	7	0.00369999823346756	7	-0.00135469597276217	7	0.00754007559185688
8	0.0011372921738424	8	-6.86811549410749E-4	8	1.14844196039243E-4	8	4.43192746475418E-4	8	0.00120081809788886	8	-0.00170923858056682	8	-4.8790272885757E-4	8	0.00334674845686411	8	8.41843951502774E-4	8	0.00180159363070764	8	7.27217343824194E-4	8	1.13368786545109E-5	8	0.0040311840534395	8	0.00122402925668652	8	-7.48211601861115E-4	8	-0.00144829099318677	8	0.00336055736574625	8	-6.80087324328227E-4	8	0.00721399935555223
9	0.00106052697890391	9	-2.12215404239657E-4	9	2.50229715253347E-4	9	5.99968585895283E-4	9	0.00136774801830519	9	-0.00135309830955688	9	-1.48164702423514E-4	9	0.00285175500434676	9	7.76880315730644E-4	9	0.0015809176283037	9	2.58805820285701E-4	9	4.16499379109148E-4	9	0.00496216152813389	9	5.52297416924752E-4	9	2.78341362734302E-4	9	-0.00188642822894369	9	0.00262111649802499	9	-7.54786758943027E-5	9	0.0065379231192475
10	7.63761783966643E-4	10	-3.57619259069075E-4	10	0.00149561523446717	10	2.86744425314289E-4	10	2.24677938721385E-4	10	-8.96958038547169E-4	10	-7.7842667599004E-4	10	0.00303676155182853	10	0.00149191667996007	10	0.00128024162589924	10	-2.79605703252805E-4	10	2.01661879563275E-4	10	0.00433313900282872	10	7.80565577162662E-4	10	0.00128489432732959	10	-0.00195456546470041	10	5.31675630304207E-4	10	-7.10870027460508E-4	10	0.0065518468829433
11	2.86996589029087E-4	11	5.69768861016229E-5	11	0.00311100075368032	11	0.00115352026473392	11	3.21607859136819E-4	11	-2.20817767537795E-4	11	-0.00131868864955553	11	0.00178176809931063	11	0.00140695304418959	11	0.00118956562349481	11	-9.58017226792229E-4	11	-0.00148317561998113	11	0.00207411647752309	11	-2.81166262599442E-4	11	0.00254144729192429	11	-8.92702700457271E-4	11	4.32234762581807E-4	11	-0.00221626137902664	11	0.00474577064663873
12	0.00104025309366129	12	3.31624673644448E-4	12	0.00341635215335145	12	6.70294197504973E-4	12	5.5853777955317E-4	12	6.44906605223206E-4	12	-0.00149895280289414	12	6.96252615132842E-4	12	1.21948288536622E-4	12	2.68522519815129E-4	12	-0.00160648861668644	12	-0.00178795928196607	12	-3.05944872074804E-4	12	-0.00162278967385809	12	0.00248800504546942	12	-1.60281297236331E-4	12	0.00108263018245758	12	-0.00155163768680389	12	0.00337767564365965
13	1.93574697005872E-4	13	-5.33693476821639E-4	13	0.00306166053272872	13	8.70657262419527E-5	13	1.75467699970788E-4	13	0.00179707417231434	13	-9.09219471356693E-4	13	5.80134786733133E-4	13	-5.33108313926611E-4	13	0.00124705583774087	13	-0.00142502908314324	13	-0.00258268082368751	13	-0.00210182024970251	13	-0.00240427637091578	13	0.00139456883725586	13	6.14148824693572E-4	13	0.00163283670340508	13	-9.46996636361774E-4	13	0.00342725129451793
14	5.96896300350203E-4	14	-9.99011627286883E-4	14	0.00221696891210765	14	7.38372549777822E-5	14	5.23976203874454E-5	14	0.00144924173940453	14	-5.19486139817893E-4	14	8.54016958331982E-4	14	-2.48164916389904E-4	14	0.00103558915566548	14	-0.00167356954960063	14	-0.00194740236540891	14	-0.00280769562733063	14	-0.00239576306797318	14	0.00113113262904196	14	0.00133857894662448	14	0.00172304322435224	14	1.37644414080818E-4	14	0.00396682694537631
15	5.02179036931949E-5	15	-4.44329777754326E-4	15	9.52277291485615E-4	15	3.30608783714936E-4	15	-1.406724591968E-4	15	5.71409306495241E-4	15	1.50247191720077E-4	15	-2.92100870068701E-4	15	5.67784811469352E-5	15	0.00147412247359124	15	-0.00242211001605686	15	-0.0017321239071304	15	-0.00273357100495986	15	-0.00278724976503053	15	-7.23035791718729E-5	15	0.00252300906855574	15	0.00305324974529952	15	-2.27714535476764E-4	15	0.00403640259623561
16	-3.76460492963027E-4	16	-7.69647928219541E-4	16	8.47585670864071E-4	16	-0.00121261968754816	16	2.66257461219332E-4	16	-5.36423126414221E-4	16	1.39980523258032E-4	16	3.17813015300317E-5	16	3.01721878684269E-4	16	0.00155265579151731	16	-0.00196065048251448	16	-6.1684544885221E-4	16	-0.00151944638258783	16	-0.00228873646208783	16	-0.00152573978738424	16	0.00258743919048587	16	0.00276345626624686	16	-4.13073485034943E-4	16	0.00535597824709377
17	-9.93138889618272E-4	17	-0.00195496607868595	17	0.00131289405024226	17	-9.75848158811132E-4	17	5.63187381636077E-4	17	-0.00114425555932396	17	7.59713854797006E-4	17	-9.84336526869356E-4	17	0.00162666527622157	17	0.00104118910944262	17	-7.69190948971321E-4	17	-4.0156699057281E-4	17	3.46782397837586E-5	17	-1.50223159145035E-4	17	-0.00270917599559795	17	0.00199186931241613	17	0.0029136627871944	17	-0.00128843243459276	17	0.00603555389795307
18	-0.00135981728627499	18	-0.00125023569769223	18	0.00179820242962059	18	-6.49076630074852E-4	18	6.40117302053156E-4	18	-0.00152208799223352	18	7.3944718633534E-4	18	-0.00169045435527071	18	5.31608673757233E-4	18	0.00117972242736819	18	-9.37731415428189E-4	18	-2.36288532294182E-4	18	-6.51197137844228E-4	18	2.98290143796898E-4	18	-0.00253261220381251	18	1.6629943434765E-4	18	0.00158386930814203	18	-0.00108379138414971	18	0.00651512954881106
19	-0.00251642632286497	19	-3.15317257289394E-4	19	0.00194330053551095	19	-1.92332002090012E-4	19	2.00117302052938E-4	19	-3.92829343751622E-4	19	6.19197047275755E-4	19	-0.00156006177584089	19	-4.53808007523371E-4	19	0.00161591334783662	19	-0.00122601636116837	19	-5.00558707140719E-4	19	-4.97851633692648E-4	19	8.47367226249673E-4	19	-0.00178606166552253	19	-0.00118534317664487	19	0.00100317589691645	19	-0.00207902398751791	19	0.00640220129249158
20	-0.0023029659993874	20	-0.00148039881688611	20	0.0021683712144247	20	-4.65590882899214E-4	20	4.853003559111E-4	20	1.08209263753878E-5	20	-1.71051820290202E-4	20	-8.79937626578453E-4	20	-0.00129927165560684	20	2.61924083885923E-4	20	-3.34281651469759E-4	20	-2.24794161457709E-4	20	-7.13796830940971E-4	20	0.00272651784515876	20	-8.49512855950252E-4	20	-0.00150125614410612	20	-0.00126758673986149	20	-0.0011442468719487	20	0.006508311197158
21	-0.00145950567590969	21	-0.00115548037648416	21	0.00229344189333869	21	2.71150236292428E-4	21	1.70483409769773E-4	21	-3.155288034975E-4	21	3.78699312143738E-4	21	-0.00145981347731539	21	-6.84735303690509E-4	21	5.47934819936202E-4	21	-3.52546941771337E-4	21	-9.39029615775411E-4	21	-8.19742028190795E-4	21	0.00378566846406958	21	-5.42964046378991E-4	21	-0.00187716911156688	21	-0.00165834937663867	21	4.05302436208288E-5	21	0.00645442110182604
22	-4.06045352432827E-4	22	-1.40561936081696E-4	22	0.0010885125722524	22	6.37891355482978E-4	22	-2.54333536370943E-4	22	-3.6187853337033E-4	22	1.98450444576892E-4	22	1.60310671946107E-4	22	-9.30198951773598E-4	22	8.83945555984589E-4	22	-0.00121081223207131	22	-6.23265070092138E-4	22	-0.00116568722544041	22	0.00344481908297922	22	-3.5641523680674E-4	22	-0.00197308207902847	22	-0.00292911201341628	22	0.00137530735919	22	0.00320053100649265
23	-7.92585028955628E-4	23	-3.15643495679474E-4	23	4.23583251166093E-4	23	7.24632474674358E-4	23	-0.00135915048251167	23	-9.08228263242883E-4	23	-6.17984229887014E-5	23	-1.29565178791147E-4	23	5.44337400143036E-4	23	4.59956292034214E-4	23	-4.69077522372352E-4	23	-2.97500524409244E-4	23	-5.41632422689453E-4	23	0.00433396970188937	23	-8.98664272348526E-5	23	-0.00107899504649023	23	-0.00276987465019385	23	8.70084474760446E-4	23	-0.00327335908883963
24	8.60875294521612E-4	24	-0.00107072505527661	24	9.68653930080166E-4	24	-4.38626406134901E-4	24	-1.13967428653439E-4	24	-0.0012545779931159	24	5.07952709444481E-4	24	-3.19441029528633E-4	24	7.68873752059918E-4	24	-1.84032971916714E-4	24	-1.17342812672838E-4	24	-1.71735978726772E-4	24	-0.00142757761993906	24	0.00480312032079855	24	-0.00134331761766227	24	-7.04908013950956E-4	24	-0.00198063728697129	24	9.74861590330001E-4	24	-0.00959724918417315
25	0.00122433561799973	25	-4.85404111538301E-4	25	0.0016135675364346	25	-0.00144189545479723	25	-2.74696378311567E-4	25	5.32389010958312E-4	25	0.00153771373625577	25	-4.81577824470669E-4	25	6.83165700055E-4	25	7.59992694195688E-4	25	7.04916407880951E-4	25	-5.54520601170339E-6	25	-0.00125945664881311	25	0.0037025605240375	25	-0.00211675941201417	25	8.52191826583137E-4	25	-0.00207205831559776	25	-3.20246645898692E-4	25	-0.0142714022810768
26	2.88072888388058E-4	26	-5.19987333672312E-4	26	0.00123815775810954	26	-0.00137518543727477	26	-7.89950041092169E-4	26	0.00659357278567807	26	0.00277749005437844	26	-1.47208805913124E-4	26	4.06954463507248E-4	26	5.09505249510767E-5	26	0.00153798623611934	26	-8.86957187917758E-5	26	-0.00101777887201582	26	0.0032125969303074	26	-0.00153018186150167	26	0.00696255333063522	26	-0.00142449685889989	26	-2.55177698543108E-4	26	-0.017751416380408
27	-8.88097525584719E-4	27	-1.04570555806482E-4	27	0.00136274797978331	27	-8.08475419753485E-4	27	-9.45203703873077E-4	27	0.00833475656039706	27	0.00378726637250182	27	-7.92839787355781E-4	27	-3.39256773040475E-4	27	-5.08091644293884E-4	27	0.00179105606435748	27	-0.00121184623157244	27	-0.00154610109521869	27	0.00301263333657609	27	-7.0360431098937E-4	27	0.0172929148346874	27	-2.06935402202291E-4	27	-6.20108751186343E-4	27	-0.0175914304797393
28	-2.14267939558255E-4	28	8.30846222059201E-4	28	9.77338201457734E-4	28	-8.41765402230799E-4	28	3.99542633346073E-4	28	0.00763594033511605	28	0.0042970426906237	28	-2.18470768797552E-4	28	-0.00125546800958887	28	-0.00135713381353852	28	0.00128412589259597	28	-5.04996744352226E-4	28	-0.00180442331842201	28	0.00328266974284563	28	-7.07026760476737E-4	28	0.0301132763387404	28	2.90626054495036E-4	28	-4.35039803829973E-4	28	-0.0138014445790704
29	-0.00123043835353265	29	0.00109626299992449	29	2.51928423132597E-4	29	1.64944615290707E-4	29	-2.9571102943482E-4	29	0.00270712410983531	29	0.00369681900874674	29	-9.74101750240486E-4	29	-0.00184167924613643	29	-0.00172617598278269	29	8.37195720834849E-4	29	-8.08147257132852E-4	29	-0.00135274554162468	29	0.00404270614911617	29	-0.00169044920996431	29	0.043743637842792	29	-0.00124181248880717	29	-7.19970856473573E-4	29	-0.00858145867840232
30	-0.00265660876750573	30	0.0013116797777899	30	-2.83481355193516E-4	30	8.11654632813408E-4	30	-5.90964692214868E-4	30	-0.00386169211544551	30	0.00257659532686905	30	-0.00192973273168295	30	-0.00151789048268469	30	-0.00183521815202692	30	2.50265549073703E-4	30	-0.00182129776991324	30	-0.00147106776482708	30	0.00340274255538553	30	-0.00242387165945246	30	0.0534739993468438	30	-0.00175425103210891	30	-1.84901909118018E-4	30	-0.00516147277773271
31	-0.00266277918147928	31	0.00240742312238673	31	3.11108866481113E-4	31	5.68364650336051E-4	31	-4.06218354996213E-4	31	-0.00987050834072623	31	1.66371644991337E-4	31	-0.00143536371312436	31	-0.0016341017192314	31	-0.00158426032127146	31	-3.76664622687706E-4	31	-0.00208444828269272	31	-7.39389988029693E-4	31	0.00253277896165471	31	-0.00226729410893967	31	0.0569043608508961	31	-0.00211668957541189	31	5.10167038238585E-4	31	-0.00386148687706367
32	-0.00164894959545236	32	0.00308363590665905	32	5.65098915663143E-4	32	-2.34919310832638E-4	32	-3.79500261344923E-4	32	-0.0136646390794768	32	-0.00119390662278995	32	-0.00158686354582827	32	-9.41025814437779E-4	32	-0.00139976695001653	32	-8.11647396106174E-4	32	-9.16010108653609E-4	32	7.80120221675951E-4	32	0.00183316913997178	32	-0.00341058075797918	32	0.0553578662261325	32	-0.00256099374350338	32	8.25622693660044E-4	32	-0.00341943637411646
33	-4.54374885503483E-4	33	0.00227984869093234	33	0.00179890891309764	33	-6.08201465609248E-4	33	-6.85190640766109E-4	33	-0.0148146555704711	33	-0.00218419398822256	33	-0.00207934152040945	33	-9.28163767241585E-4	33	-0.0019763509886781	33	-7.56305603134777E-4	33	-0.00183730715347785	33	0.00141760250353418	33	0.00122366544990538	33	-0.00243382666688508	33	0.0502323147627237	33	-0.0030156088490596	33	7.71142800425118E-4	33	-0.00410204177078999
34	7.30199824444888E-4	34	0.00122606147520443	34	0.0013027189105328	34	-0.00115148362038564	34	-9.70881020186276E-4	34	-0.0126646720614669	34	-0.00255448135365466	34	-0.00105181949499045	34	1.94698279955219E-4	34	-0.00158293502733997	34	8.90361898369108E-5	34	-0.00107860419830175	34	0.00191508478539237	34	6.8416175983721E-4	34	-8.27072575789956E-4	34	0.0432667632993153	34	-0.00215022395461517	34	0.00102666290719178	34	-0.0054946471674624
35	0.00165477453439422	35	-2.47725740522675E-4	35	0.00170652890796763	35	-0.00112476577516141	35	-5.86571399606051E-4	35	-0.00845468855246256	35	-0.00222476871908839	35	-4.64297469570774E-4	35	5.47560327150975E-4	35	-0.00211951906600127	35	0.00189437798280867	35	3.20098756874998E-4	35	0.00272256706725127	35	7.4465806977031E-4	35	3.79681515303432E-4	35	0.0357712118359066	35	-4.54839060171963E-4	35	0.00127218301395615	35	-0.00546725256413527
36	0.00161934924434259	36	-0.00112151295625029	36	0.00175033890540277	36	-0.00122804792993758	36	-5.52261779026786E-4	36	-0.00469470504345715	36	-6.85056084520852E-4	36	-5.36775444151871E-4	36	5.60422374347169E-4	36	-0.00214610310466323	36	0.00201971977578008	36	9.88801712050957E-4	36	0.00209004934910872	36	2.05154379702144E-4	36	3.26435606397446E-4	36	0.0293556603724969	36	-9.94541657286518E-5	36	-6.92296879278409E-4	36	-0.00414985796080813
37	0.00163392395429263	37	-0.00168528772335286	37	0.00169414890283814	37	-9.313300847138E-4	37	-8.37952158446065E-4	37	-0.00180472153445255	37	-1.25343449953519E-4	37	-2.09253418733013E-4	37	-0.00120671557845586	37	-0.00204268714332478	37	0.00224506156875215	37	0.00130750466722596	37	0.00101753163096685	37	6.05650689634807E-4	37	8.03189697491824E-4	37	0.0231501089090882	37	4.95930728714455E-4	37	-0.0014567767725131	37	-0.0025924633574812
38	7.84986642408114E-5	38	-0.00159810394636306	38	6.87720508187439E-4	38	6.54060926299493E-5	38	-9.36425378670336E-5	38	1.20440007617795E-4	38	5.44306502908043E-4	38	6.61683352340958E-5	38	-0.00113400215858039	38	-7.92124146336448E-4	38	0.00251131437582242	38	0.00238711911719491	38	0.00115484412525735	38	2.36057110594601E-4	38	-4.49961814219968E-4	38	0.0175096583149745	38	9.30522486083163E-4	38	-0.00138106385806935	38	-0.00113539434661458
39	-1.4662168387769E-4	39	-8.10920169372231E-4	39	0.00132040356121799	39	0.00109221059878806	39	7.10667082713279E-4	39	-6.6235593606212E-4	39	3.82412772381713E-6	39	-5.62843817197844E-4	39	-0.0011218427132631	39	-0.00138758407408446	39	0.0021194904348798	39	0.00218865783394762	39	0.00166624262357029	39	-1.33871509157224E-4	39	-0.00147276148184794	39	0.0133900382336876	39	0.00131343984295818	39	-4.14943905192366E-4	39	-3.00123808717245E-4
40	6.09172793800461E-4	40	0.00117626360761758	40	0.00148308661424768	40	0.00258901510494614	40	0.00119497670329416	40	-5.95151879742239E-4	40	4.03341752538644E-4	40	-8.0185596962945E-4	40	-7.5968326794662E-4	40	-0.00120304400183269	40	-2.62333506063861E-4	40	7.50196550701077E-4	40	0.00221764112188261	40	1.06199871089174E-4	40	-0.0013855611494753	40	0.00993041815240048	40	9.76357199833799E-4	40	2.31176047683412E-4	40	-6.44853270821422E-4
41	0.00126496727147885	41	0.00201344738460829	41	0.00185576966727918	41	0.00378581961110402	41	0.00129928632387344	41	1.12052176579169E-4	41	-4.27140622646149E-4	41	-8.90868122060517E-4	41	-2.67523822629734E-4	41	-9.88503929581164E-4	41	-7.24157447005602E-4	41	0.00104173526745477	41	0.00258903962019552	41	5.86271251337145E-4	41	-5.18360817101993E-4	41	0.00723079807111393	41	0.00109927455670888	41	0.00197729600055929	41	-6.29582732924128E-4
42	6.40761749156837E-4	42	0.00166063116159876	42	0.00193845272030924	42	0.00310262411726203	42	0.00181359594445407	42	3.89256232899093E-4	42	-4.77622997830274E-4	42	-0.0011898802744934	42	0.0016546356226872	42	-0.00115396385732947	42	-3.45981387948058E-4	42	7.83273984207966E-4	42	0.00290043811850893	42	-1.23657368415131E-4	42	4.48839515270194E-4	42	0.00522117798982702	42	0.00109219191358445	42	0.00217341595343523	42	-6.44312195028363E-4
43	3.46556226834771E-4	43	0.00149781493858914	43	0.00292113577333986	43	0.00255942862342007	43	0.00131790556503297	43	6.76460289218639E-4	43	-9.18105373015621E-4	43	-6.3889242692472E-4	43	0.00146679506800407	43	-0.00150942378507768	43	1.02194671107725E-4	43	5.24812700960275E-4	43	0.00320183661682183	43	-5.33585988168106E-4	43	0.0014960398476429	43	0.00362155790853969	43	1.75109270459828E-4	43	0.00200953590631237	43	-0.00104904165713204
44	-1.2764929548581E-4	44	0.00165567607519712	44	0.00283381882637013	44	0.00214623312957762	44	7.02215185613753E-4	44	4.73664345539859E-4	44	-4.85877481999353E-5	44	4.82095420642814E-4	44	0.0016189545133205	44	-6.34883712825385E-4	44	-4.9629269834206E-5	44	-1.23648582286862E-4	44	0.00258323511513403	44	-8.43514607920426E-4	44	0.00199324018001601	44	0.00221193782725315	44	-0.00129197337266529	44	8.45655859188277E-4	44	-1.73771119235333E-4
45	6.08145182191322E-4	45	0.00133396056156521	45	0.00220548951905197	45	5.63102171267538E-4	45	-7.91651186773379E-4	45	5.5480175965883E-4	45	-1.93003159365546E-5	45	0.00143886686539751	45	9.00892622128779E-4	45	-6.47396655530486E-4	45	1.10762261482655E-4	45	4.20744040996013E-4	45	0.00111056770830853	45	-0.00154435819990972	45	0.00140093200754432	45	0.00107642833697152	45	-0.00120121142254437	45	3.52345610880711E-4	45	7.98493118989718E-4
46	9.64719895706345E-4	46	8.52245047934019E-4	46	0.00125662425625439	46	-9.19994621172648E-4	46	-3.76904849554549E-4	46	8.73375544085953E-4	46	2.09924336540546E-4	46	0.00159448838211063	46	5.3271355278639E-4	46	-0.00128183314776997	46	-1.82419874912299E-5	46	7.65915002423512E-4	46	3.68609600081449E-4	46	-7.45686188965422E-4	46	3.48884038390729E-4	46	0.00104015386545786	46	-0.00140103731062879	46	9.91907622482913E-5	46	9.04482911848525E-4
47	6.72074845057935E-4	47	7.50529534302657E-4	47	5.57758993458002E-4	47	-0.00109309141361269	47	4.97841487665518E-4	47	0.00100194932851405	47	4.91489890173114E-5	47	0.00172010989882398	47	-5.05465516556391E-4	47	-0.00172626964000866	47	-2.27246236467415E-4	47	4.61085963851637E-4	47	0.00140665149185448	47	-2.67014178020553E-4	47	-4.33163930763314E-4	47	0.00175387939394422	47	-0.00151086319871308	47	0.00125603591361756	47	0.00121047270470864
48	0.00105942979440954	48	1.08814020672199E-4	48	-4.81106269338838E-4	48	-0.00145618820605176	48	4.22587824885134E-4	48	-6.94768870577178E-5	48	2.08373641493509E-4	48	0.00174573141553758	48	-7.43644585900149E-4	48	-0.00121070613224816	48	-9.36250485441548E-4	48	-2.73743074720834E-4	48	9.64693383626702E-4	48	6.01657832922875E-4	48	-0.0014252118999174	48	1.97604922430372E-4	48	-0.00119068908679854	48	0.00123288106498531	48	0.00266646249756786
49	6.36784743760721E-4	49	-5.72901492960298E-4	49	1.60028467863782E-4	49	-0.00219928499849242	49	4.87334162103892E-4	49	-4.09031026302742E-5	49	3.0759829397109E-4	49	0.00110135293225078	49	-0.00171182365524203	49	-7.45142624486661E-4	49	-4.35254734416191E-4	49	1.11427886706039E-4	49	0.00146273527539975	49	7.80329843867555E-4	49	-5.87259869071488E-4	49	4.91330450917538E-4	49	-7.05149748840839E-5	49	0.00146972621635388	49	0.00236245229042797
50	-5.35860306888125E-4	50	-0.00149436901686251	50	6.3116320506662E-4	50	-0.00124238179093261	50	8.12080499323464E-4	50	4.76706817975625E-5	50	4.56822946446778E-4	50	-5.30255510353683E-5	50	-0.00189000272458539	50	-6.1957911672561E-4	50	-2.44258983391532E-4	50	0.00101659884813365	50	0.00210077716717194	50	8.790018548126E-4	50	-1.89307838224906E-4	50	9.65055979404106E-4	50	3.49659137031111E-4	50	0.00189657136772237	50	0.00167844208328827
51	-6.18505357536492E-4	51	-0.00322494669526918	51	9.92101296940717E-4	51	-6.65476234412488E-4	51	1.73323306095874E-4	51	4.61852844580335E-4	51	4.15950991373926E-4	51	-7.98560542183857E-4	51	-0.00195818488851796	51	-0.0017960409095803	51	6.07428060626525E-4	51	0.00139282748444991	51	0.00289049736221525	51	-0.00177254623340595	51	-3.91255825391568E-4	51	3.1675897818495E-4	51	-3.30911775358267E-4	51	0.001753607389122	51	0.0018977546923411
52	-5.01150408184436E-4	52	-0.00306552437367547	52	0.0011011909227312	52	-5.28548597666045E-4	52	-0.00142236707332355	52	8.42860142425295E-4	52	5.34789213650022E-4	52	1.42434943085412E-4	52	-0.00171639614158803	52	-0.00203857860428602	52	3.81188983623382E-4	52	0.00185222914543104	52	0.00224525246706797	52	-0.00359616325375978	52	1.07736018130744E-4	52	-0.00120654980226664	52	-7.13717760662647E-4	52	0.00110121602061408	52	0.00210703574997773
53	-5.12448037689239E-4	53	-0.00296610205208214	53	0.0020702805485211	53	-9.61620960920229E-4	53	-0.00200805745274391	53	0.00209386744027196	53	3.73627435925172E-4	53	-4.66569571644371E-4	53	-0.00107460739465726	53	-0.00311111629899141	53	-8.50500933795573E-5	53	0.00233163080641141	53	0.00207000757192155	53	-0.0063897802741133	53	6.86727861652692E-4	53	-1.09858582720612E-4	53	-1.86523745966838E-4	53	0.00150882465210689	53	0.00130631680761439
54	-1.93296526810549E-4	54	-0.00331667973048866	54	0.00203937017431066	54	-1.94693324173656E-4	54	-0.00174374783216358	54	0.00250487473811845	54	4.32465658200876E-4	54	-1.65574086374853E-4	54	4.37181352273441E-4	54	-0.00385365399369508	54	2.87108296186389E-5	54	0.0017810324673917	54	0.0016847626767742	54	-0.0086833972944671	54	-3.94280294825577E-4	54	-3.53167363172702E-4	54	-1.79329731270883E-4	54	0.00186643328359892	54	0.00104559786525105
55	-3.94145015933489E-4	55	-0.00236725740889554	55	0.00161845980010078	55	-0.00118776568742707	55	-0.00140943821158501	55	0.0030658820359637	55	3.31303880477307E-4	55	3.7542139889446E-4	55	0.00104897009920446	55	-0.00317619168840011	55	7.02471752615175E-4	55	8.00434128372274E-4	55	0.00148951778162765	55	-0.010107014314821	55	-5.15288451303775E-4	55	-6.76476143624427E-4	55	-4.82135716575627E-4	55	0.00185404191509075	55	0.0012048789228869
56	-0.00165499350505538	56	-0.00165783508730222	56	0.00111754942589126	56	-0.00118083805068014	56	-0.00112512859100455	56	0.00264688933380963	56	0.00117014210275368	56	8.26416884163628E-4	56	9.00758846134053E-4	56	-0.00100872938310559	56	8.46232675612235E-4	56	-7.00164210647891E-4	56	0.00149427288648063	56	-0.010000631335175	56	6.73703392218172E-4	56	-4.89784924076808E-4	56	-1.04941701879469E-4	56	0.00202165054658376	56	9.41599805237558E-5
57	-0.00105584199417752	57	-0.0024773285693005	57	0.00110663905168007	57	-2.73910413934431E-4	57	-1.6081897042497E-4	57	0.00253789663165627	57	5.5898032502899E-4	57	-4.02587630567552E-4	57	0.00144254759306506	57	7.08732922189981E-4	57	0.00161999359860943	57	-8.80762549666514E-4	57	0.00125902799133382	57	-0.00869424835552746	57	4.82695235740849E-4	57	2.36906295470796E-4	57	-3.67747687184838E-4	57	0.00199925917807597	57	-7.76558961839591E-4
58	7.33095166998154E-5	58	-0.00147658488333491	58	7.04331121362145E-4	58	2.23037296407824E-4	58	7.39110420653333E-4	58	0.00175060180518294	58	4.57460362302875E-4	58	-7.047220996661E-4	58	8.34657402982941E-4	58	0.00105197490194442	58	0.00263561508907451	58	-7.88084310705095E-4	58	0.00111281409151598	58	-0.0072292124707376	58	0.00118240179491647	58	-1.6004406721315E-4	58	-2.7279881033504E-4	58	0.0013273491675605	58	-0.00174545286176375
59	1.02461027577938E-4	59	-1.85841197368752E-4	59	6.20825285808202E-4	59	1.10002212687199E-4	59	5.2385675787292E-4	59	0.00151398612898301	59	-4.04202874422666E-4	59	-0.00163810855051061	59	-3.29575902533463E-5	59	0.00102352875148171	59	0.00297198080652716	59	3.25904559449697E-4	59	4.14212589828544E-4	59	-0.00577533123867902	59	0.0023427209675102	59	-9.32972928954001E-4	59	-5.48747988623255E-4	59	0.00146563170024194	59	-0.00182161674471093
60	1.73695128465212E-4	60	2.5490248859672E-4	60	0.00115731945025477	60	0.00110696712896718	60	0.00118860309509206	60	2.37370452782493E-4	60	-0.00120586611114959	60	-0.0013614950013574	60	-4.50572583489794E-4	60	-1.84917398979856E-4	60	0.00324834652397943	60	3.49893429604009E-4	60	4.55611088142405E-4	60	-0.00383145000662122	60	0.00314304014010336	60	-8.65901790692902E-4	60	-2.54697166911733E-4	60	0.00133391423292206	60	-0.00253778062765875
61	7.94929229351204E-4	61	5.55646174562163E-4	61	0.00102381361470183	61	0.00150393204524679	61	6.23349432311571E-4	61	-2.19245223417985E-4	61	-0.0018075293478752	61	-0.00108488145220331	61	4.21812423274659E-4	61	2.96636450556775E-4	61	0.00286471224143092	61	0.0012138822997585	61	5.87009586454634E-4	61	-0.0014475687745632	61	0.00261335931269802	61	-9.1883065243259E-4	61	-5.00646345201972E-4	61	0.00113219676560394	61	-0.0024739445106059
62	0.00120616333023804	62	7.96389860528102E-4	62	2.10307779147101E-4	62	7.00896961525643E-4	62	1.98095769531115E-4	62	-6.15860899618959E-4	62	-0.00131919258460123	62	-8.58267903048215E-4	62	0.00136419743003913	62	-2.11809699904641E-4	62	0.00222107795888338	62	0.00110787116991329	62	-0.00133159191523191	62	-0.0010836875425051	62	0.00265367848529152	62	-3.9175951417203E-4	62	-1.16595523490304E-4	62	7.10479298284383E-4	62	-0.00318010839355409
63	8.7739743112536E-4	63	-1.02136996792623E-4	63	-0.00242319805640623	63	3.67861877806241E-4	63	-7.67157893249326E-4	63	-2.22476575819641E-4	63	-8.40855821326869E-4	63	2.68345646105672E-4	63	0.00125658243680249	63	-1.50255850367209E-4	63	0.0014974436763362	63	0.00135186004006727	63	-0.00234019341691916	63	7.40193689552804E-4	63	0.00161399765788595	63	-3.94688375911834E-4	63	-1.42544701778213E-4	63	0.00116876183096615	63	-0.00239627227650185
64	1.08631532011572E-4	64	-8.89669140409666E-4	64	-0.00509670389195982	64	2.34826794086374E-4	64	-0.00123241155603093	64	-1.63028304121404E-4	64	-1.52628653108167E-4	64	6.84313035650419E-4	64	0.00101896744356633	64	5.50736484083103E-4	64	8.1407090721175E-4	64	9.26704510900933E-4	64	-0.00248498871954084	64	0.00178407492161181	64	0.00122431683047886	64	9.52382762348769E-4	64	-3.09076426714405E-4	64	2.37125450710529E-4	64	-0.00203664178788809
65	7.79865632898336E-4	65	-0.00182720128402902	65	-0.00759332056985595	65	-8.58142797820705E-4	65	-0.00190766521881081	65	6.82314127904426E-4	65	-3.24905622139049E-4	65	5.973080909909E-4	65	6.32365976733773E-4	65	0.00207914584913205	65	2.19010998359082E-5	65	0.00106548474485724	65	-0.0030882755064594	65	0.00176640064211231	65	0.00140612836824072	65	0.00193054762009659	65	3.81712133772361E-4	65	-7.41379290571942E-5	65	-0.00139635719009679
66	9.31690669741414E-4	66	-0.00190473342764719	66	-0.00889999824466159	66	-0.00152111110557307	66	-0.00164291888159251	66	6.97656559932369E-4	66	-0.00138718259117088	66	-1.29696853668371E-4	66	6.57843829694471E-5	66	4.57555214181227E-4	66	-6.10268707540662E-4	66	3.44264978814124E-4	66	-0.00269156229337852	66	0.00191869586238713	66	0.00131796916806337	66	0.0029483417664613	66	0.00117250069425889	66	3.84598691174354E-4	66	-0.00144607259230423
67	5.75288514453653E-4	67	-0.00148226557126474	67	-0.00900667591946558	67	-0.00187407941332651	67	-0.00189817254437319	67	0.00168299899195823	67	-0.00277945956020265	67	-3.6670179832754E-4	67	-0.00154079721079547	67	-1.40354207704974E-5	67	-0.00147243851491563	67	8.43045212770122E-4	67	-1.44849080298215E-4	67	0.00321099108266143	67	0.00161980996788635	67	0.00207613591282652	67	0.00100328925474624	67	6.33335311406746E-4	67	-7.65787994512657E-4
68	-1.11113640834937E-4	68	-9.09797714883531E-4	68	-0.00795335359427085	68	-0.00170704772107833	68	-0.0012534262071533	68	0.00248834142398557	68	-0.0030017365292343	68	-0.00132370674298787	68	-0.00128737880456065	68	8.94373944277937E-4	68	-0.00195460832229255	68	6.51825446725596E-4	68	0.00160186413278307	68	0.00322328630293622	68	0.00201165076770948	68	0.00284393005919092	68	2.84077815233097E-4	68	2.22071931640144E-4	68	-4.35503396720272E-4
69	4.02484203877229E-4	69	-6.67273010600766E-4	69	-0.00879003126907651	69	-0.00112001602883183	69	-7.2867986993419E-4	69	0.00284368385601219	69	-0.00377401349826556	69	-0.00100071168764693	69	-5.83960398325978E-4	69	4.82783309326607E-4	69	-0.00210677812966864	69	9.70605680681302E-4	69	0.00269857734586409	69	0.00335558152321003	69	0.0017234915675326	69	0.00260172420555627	69	7.24866375719557E-4	69	6.00808551872056E-4	69	-9.52187989273767E-5
70	4.16082048589672E-4	70	-6.82588086077018E-4	70	-0.00878670894388112	70	-1.12984336584354E-4	70	4.16066467284537E-4	70	0.00294902628803939	70	-0.00314629046729742	70	-5.87716632306723E-4	70	4.09458007909258E-4	70	-0.00136880732562528	70	-0.00220894793704396	70	4.89385914637985E-4	70	0.00285529055894429	70	0.00357787674348398	70	9.2533236735548E-4	70	0.00247951835192062	70	4.56549362057856E-5	70	7.59545172104303E-4	70	-5.14934201135908E-4
71	5.69679893300368E-4	71	-6.57903161553897E-4	71	-0.00818488445147647	71	0.00132409590655858	71	3.51370494861669E-4	71	0.00281426684752617	71	-0.00223898030302383	71	3.77312496446791E-6	71	-5.65698746202159E-5	71	-0.00122080837929328	71	-0.00148121007782809	71	0.00155123643855948	71	0.00164217355959284	71	0.00327987971113686	71	0.00175783664842921	71	0.00215731249828632	71	-0.00102573514919069	71	-4.16069472937153E-5	71	3.24559210627129E-5
72	1.32777380130733E-5	72	-4.73218237029727E-4	72	-0.00756510245833297	72	0.00235124235546991	72	3.56168274695534E-5	72	0.00216278414448912	72	-3.51899509136722E-4	72	5.44266055300113E-5	72	-5.18426963704854E-5	72	-0.00108303744335991	72	-9.35235149519542E-5	72	5.34792679128593E-4	72	2.56928664446043E-4	72	0.00246148415248815	72	0.00165124567666552	72	0.00505510664465092	72	-0.00188833559341095	72	-0.00135269725537412	72	2.9268244570968E-4
73	-2.91857794902484E-4	73	1.81466687494414E-4	73	-0.00568532046518833	73	0.00255838880438208	73	-9.20136839921426E-4	73	8.61301441452689E-4	73	-9.48187152483015E-5	73	4.05080086094856E-4	73	0.0010728844818777	73	-0.00243526650742698	73	0.00111416304792478	73	8.83489196983334E-5	73	-9.8316230700668E-5	73	0.00124308859383859	73	0.00219465470490032	73	0.00688290079101606	73	-0.00178093603763063	73	-0.00209378756345657	73	-4.37091029643177E-4
74	1.34273294555953E-4	74	-3.73848387982711E-4	74	-0.00250553847204404	74	0.00166553525329327	74	-7.75890507313193E-4	74	6.49818738416741E-4	74	8.12262078638604E-4	74	6.15733566660559E-4	74	0.00127761166012696	74	-0.00166749557149348	74	0.00221184961080212	74	3.31905160267709E-4	74	-3.1356112584735E-4	74	2.84693035188965E-4	74	0.00256806373313623	74	0.00704069493738135	74	-0.00164353648185145	74	-0.00306487787153742	74	-7.76864504997477E-4
75	-6.09595615985725E-4	75	-7.91634634591531E-5	75	-2.55756478900082E-4	75	0.00150268170220436	75	-5.61644174704057E-4	75	8.88336035378856E-4	75	9.29342872526995E-4	75	-3.13612952774101E-4	75	0.00177233883837502	75	4.30275364439403E-4	75	0.00163953617367874	75	5.54614008372312E-5	75	3.11939790051952E-5	75	1.66297476539512E-4	75	0.00233147276137124	75	0.0057584890837461	75	-0.00136613692607135	75	-0.00224596817961942	75	-4.66637980350626E-4
76	-7.73464526527157E-4	76	4.07283511966838E-4	76	2.34025514243896E-4	76	8.39828151116606E-4	76	5.92602157904132E-4	76	8.66853332342821E-4	76	9.36423666413333E-4	76	-9.42959472209459E-4	76	0.00255706601662364	76	9.48046300372596E-4	76	1.3722273655592E-4	76	-0.001470982358593	76	6.15949083859313E-4	76	1.97901917889709E-4	76	0.00129488178960635	76	0.00370628323011069	76	-0.00102873737029174	76	-0.00152705848770029	76	-5.56411455703731E-4
77	-4.07333437069113E-4	77	0.00111477333384524	77	5.63807507388603E-4	77	0.00145697460002836	77	0.00187684849051273	77	5.22025976801288E-4	77	0.0011334422357443	77	-6.23854954699965E-5	77	0.00327179319487314	77	0.00198603883347293	77	-9.85240020085598E-4	77	-0.00110693323674482	77	0.0013761994388144	77	3.89506359240954E-4	77	2.68290817842853E-4	77	-0.00107592262352441	77	-1.91707980691902E-4	77	-2.8815645406155E-4	77	-3.77902423162269E-4
78	4.87976523881883E-5	78	0.00177226315572376	78	-7.09531442138811E-4	78	0.00128422036510312	78	0.00218640204362774	78	6.19326517055541E-4	78	8.5994226709829E-4	78	2.57525949380444E-4	78	0.00155772474438365	78	0.00328587800962854	78	-0.00190894710604095	78	-3.48776770907833E-4	78	2.85576877956828E-4	78	0.00201089749059946	78	-6.370193237073E-4	78	-0.00421400407515815	78	3.0223669074303E-4	78	2.10681760581366E-4	78	-6.37058248313949E-5
79	1.0492874184731E-4	79	0.00372975297760192	79	-0.00218335587163843	79	0.00161148157935997	79	0.0028954478310439	79	0.00142662705730956	79	8.86442298452472E-4	79	1.57437394230797E-4	79	5.9384364053372E-4	79	0.00267571718578452	79	-0.00217265419199641	79	5.9379694929973E-5	79	-8.35045682901381E-4	79	0.00315225544040487	79	-8.72130225000767E-4	79	-0.00588877728648107	79	5.66181362176899E-4	79	0.00169951997522233	79	5.04907734981686E-5
80	0.00173307057575034	80	0.00373724279948107	80	-0.00278718030113723	80	0.00103874279361627	80	0.00238449361845916	80	0.00110392759756373	80	7.02942329806611E-4	80	3.17348839081077E-4	80	-4.90037463316106E-4	80	0.00227555636194055	80	-0.00165636127795299	80	0.00158753616076801	80	-0.00137566824375845	80	0.00298361339021103	80	-5.67241126294249E-4	80	-0.00577355049780337	80	7.60126033611641E-4	80	2.88358189864724E-4	80	4.44687371829566E-4
81	0.00131188265780224	81	0.00333473262135886	81	-0.00208100473063588	81	3.8600400787292E-4	81	0.00142353940587547	81	9.51228137818561E-4	81	2.0944236116005E-4	81	0.00104726028393198	81	-0.0016739185671657	81	0.00249539553809708	81	-2.7006836390786E-4	81	0.00238569262660526	81	-9.26290804616592E-4	81	0.00178497134001621	81	-1.12352027588969E-4	81	-0.00435832370912514	81	0.00134407070504672	81	7.19640450608239E-6	81	5.78883970160149E-4
82	9.20694739854788E-4	82	0.00248298180529272	82	-0.00137482916013543	82	-0.00111673477787111	82	1.72585193291219E-4	82	0.00142852867807264	82	-3.44057607485126E-4	82	7.27171728781784E-4	82	-0.00266779967101449	82	0.00255523471425256	82	-1.23775449864638E-4	82	0.003173849092442	82	-9.66913365473943E-4	82	0.00177632928982252	82	-0.00122746292888287	82	-0.00249309692044886	82	0.00124801537648089	82	-4.0396538085119E-4	82	0.00145308056849025
83	7.4950682190611E-4	83	0.00170376219607604	83	-0.00141865358963411	83	-9.09473563614149E-4	83	0.00104163098070753	83	0.00253582921832596	83	-6.17557576131134E-4	83	2.37083173632691E-4	83	-0.00185168077486431	83	0.00217507389040872	83	-2.27482535820833E-4	83	0.00270200555828026	83	-6.75359263322406E-5	83	0.00251768723962709	83	-0.00224257383017701	83	-5.07870131770893E-4	83	8.21960047916015E-4	83	-6.51271662093222E-5	83	0.00177727716682075
84	3.68318903958276E-4	84	7.44542586858188E-4	84	-1.83575054854224E-4	84	-4.8221345326116E-4	84	8.21341840466339E-4	84	0.00101421068523511	84	-0.00111136466134187	84	8.74143062556954E-5	84	-7.35234087679615E-4	84	0.00171714805092993	84	-0.00129254494115205	84	0.00172262372606546	84	4.69940724299178E-4	84	0.00279899780727977	84	-0.00277726707511583	84	8.35695631254296E-4	84	6.23917739711821E-4	84	-6.16437010092064E-4	84	0.00146460303522922
85	-8.92869013989994E-4	85	9.35322977641206E-4	85	-0.00102096485044711	85	-4.74955826692103E-4	85	0.00134254911299969	85	-6.40971528653722E-5	85	-6.55402083975964E-4	85	4.18060204708581E-4	85	-4.48049870668932E-4	85	8.30898449724948E-4	85	-9.98623836018453E-4	85	9.25088170312449E-4	85	0.00142349178354628	85	0.00368020176509098	85	-0.00272102059325796	85	8.40524086558325E-4	85	2.54385196779339E-4	85	-3.27857897871375E-4	85	0.0016967758561961
86	-7.40569319379603E-5	86	0.001786103368425	86	-0.00174835464603973	86	-7.17698200123351E-4	86	6.83756385532419E-4	86	5.87595009035269E-4	86	-5.59439506610637E-4	86	6.87061031605651E-5	86	-1.30865653657608E-4	86	1.54648848520011E-4	86	-7.4470273088334E-4	86	0.00112755261455888	86	5.17042842791859E-4	86	0.0052414057229031	86	-0.00274477411140062	86	3.25352541861612E-4	86	-3.05147346153056E-4	86	-7.89278785648939E-4	86	0.00121894867716232
87	4.67513537481423E-4	87	0.00261688375920688	87	-0.00222574444163293	87	-0.00109044057355501	87	0.00136496365806593	87	7.1928717093428E-4	87	-0.00104347692924467	87	6.39352001614135E-4	87	8.96318563352594E-4	87	-0.00135160075268459	87	-4.60781625749362E-4	87	8.90017058805981E-4	87	3.90593902038994E-4	87	0.00530260968071339	87	-9.38527629542385E-4	87	5.50180997166194E-4	87	-4.44679889085364E-4	87	-3.06996734273923E-5	87	3.11121498127953E-4
88	2.59084006900778E-4	88	0.00248766414998958	88	-0.00276313423722563	88	-0.00137318294698652	88	0.0014061709305988	88	7.10979332835038E-4	88	-8.27514351879444E-4	88	0.00130999790006658	88	0.0012035027803643	88	-0.00154785035388905	88	-2.76860520613376E-4	88	4.5248150305266E-4	88	1.14144961285589E-4	88	0.00265381363852502	88	3.57718852315614E-4	88	2.45009452471301E-4	88	-2.44212432017221E-4	88	6.37879438794897E-4	88	3.13294319095547E-4
89	3.80654476320075E-4	89	0.0024113601767306	89	-0.00412052403281837	89	-0.00289592532041816	89	0.00166737820313134	89	7.72671494734034E-4	89	-4.6155177451368E-4	89	0.00131064379851953	89	-1.69313002625238E-4	89	-9.84099955094742E-4	89	7.97060584520892E-4	89	4.04945947298785E-4	89	4.57696020532694E-4	89	0.00155501759633481	89	0.00110396533417401	89	2.89837907774704E-4	89	-2.43744974950388E-4	89	6.36458551016794E-4	89	4.95467140060768E-4
90	5.22249457386437E-5	90	0.00263563933066191	90	-0.00376791382841279	90	-0.0029386676938481	90	0.00173858547566486	90	9.14921098718935E-4	90	-1.15606282240499E-4	90	0.00125134587987397	90	-7.92128785614743E-4	90	-4.70181136189574E-4	90	6.40877256865124E-4	90	6.57539887128245E-4	90	1.80458240030212E-4	90	-7.3778445853101E-5	90	0.00155021181603221	90	-8.53336369210922E-5	90	-6.03404092913706E-4	90	3.55021971982339E-4	90	1.47322166457187E-4
91	-0.00115620458484145	91	0.00250991848459403	91	-0.00445788021677629	91	-0.00239145978074973	91	0.00363168788199708	91	3.92221638972678E-4	91	1.89877912537106E-4	91	9.0356489957788E-4	91	-1.44218911544591E-4	91	4.78285025685921E-4	91	2.71874243868098E-4	91	0.00114363020769392	91	0.00106192178632636	91	-3.13040311642254E-4	91	0.00183745032428195	91	-4.49445108774427E-5	91	-0.00200648073673992	91	3.63161729042716E-4	91	7.10596739432745E-4
92	-0.00123463411542257	92	0.00173419763852589	92	-0.00585870546939837	92	-0.00166426843880618	92	0.003925421999595	92	5.95221792263345E-5	92	-1.14637892686176E-4	92	-4.54216080718162E-4	92	-4.86067151786784E-4	92	0.00159675118756031	92	2.22871230872279E-4	92	9.99720528258585E-4	92	0.00128338533262351	92	-6.92457451964223E-4	92	0.00245501950799643	92	6.72981720786225E-5	92	-0.00316955738056546	92	-5.86985138975038E-5	92	0.00160387131240913
93	-5.52363803372202E-4	93	0.00106847679245803	93	-0.00517953072202193	93	-0.00113707709686306	93	0.00314915611719346	93	8.68227194805726E-5	93	5.10846302092638E-4	93	-4.71997061014307E-4	93	-1.87915392030114E-4	93	0.00246521734943528	93	6.13868217874902E-4	93	0.00165581084882493	93	9.94848878918653E-4	93	4.28125407714752E-4	93	0.00257258869171029	93	-4.04591449649772E-5	93	-0.00282263402439042	93	-6.30558756838262E-4	93	0.00214714588538456
94	-6.27993963431273E-4	94	5.02755946389932E-4	94	-0.00406035597464349	94	-7.39885754920344E-4	94	0.00182289023479232	94	0.00146412325973522	94	0.00146633049686962	94	1.10221958689039E-4	94	9.90236367727881E-4	94	0.00307368351131032	94	-6.95134795121177E-4	94	9.71901169390499E-4	94	0.00189631242521493	94	-0.00211129173260716	94	0.00305015787542384	94	3.41783537991525E-4	94	-0.00276571066821507	94	-5.92418999778133E-4	94	0.0019704204583606
95	-2.33624123489484E-4	95	-5.81458107636657E-4	95	-0.00381118122726587	95	-0.00121269441297667	95	0.00133662435239046	95	0.00319142379998993	95	7.8181469164651E-4	95	1.32440978392268E-4	95	0.00128838812748544	95	0.00356214967318458	95	-0.00120413780811823	95	5.37991489955481E-4	95	0.00172777597151086	95	-0.00458070887292816	95	0.00235772705913728	95	0.00104402622094746	95	-0.0023387873120404	95	2.45720757281909E-4	95	0.00262369503133719
96	7.1074571645191E-4	96	-0.0012937221954914	96	-0.00412200647988747	96	-0.00135550307103394	96	0.00124035846998893	96	0.00351872434024436	96	0.00195729888642404	96	0.00155465999809667	96	6.76539887241923E-4	96	0.00259061583505904	96	-0.0018431408211157	96	-9.59181894781835E-5	96	9.19239517806147E-4	96	-0.00768012601325108	96	0.001725296242852	96	0.00110626890390364	96	-0.00100186395586466	96	5.33860514341455E-4	96	0.00281696960431432
97	7.75115556393757E-4	97	-7.9598628334665E-4	97	-0.00329343383480118	97	-0.00174830112825308	97	0.00154463787064518	97	0.00330067511814391	97	0.00232257394029656	97	0.00217765584828467	97	3.94856207836192E-4	97	0.00135156846251228	97	-0.00139382509318597	97	3.61508336927052E-4	97	0.00128116968152092	97	-0.00973976199986648	97	0.00107309949160772	97	8.88680559652855E-4	97	-5.66660245643114E-4	97	2.51688928359251E-4	97	0.00230677159810533
98	6.0948539633543E-4	98	-7.58250371201363E-4	98	-0.00291739001934133	98	-0.00188105466195143	98	0.00276120746014552	98	0.00306727613369073	98	0.00224763985326426	98	0.00203142852895688	98	-4.56136316056011E-4	98	5.4500755554443E-4	98	-0.00125619062432936	98	-9.72893082629156E-6	98	0.00211356646265504	98	-0.0107803171409202	98	0.00114188581354124	98	5.1980190113099E-4	98	-0.00113317618137287	98	-4.30794000664925E-4	98	0.00192310101271431
99	0.00167385523627672	99	-3.80514459056513E-4	99	-0.00435134620388133	99	-0.00120380819565025	99	0.0032777770496466	99	0.00184387714923684	99	6.12705766231514E-4	99	0.00171520120962931	99	-0.00162712883994853	99	-3.915533514256E-4	99	-2.88556155473074E-4	99	0.00160903380141963	99	0.00165596324378736	99	-0.00909087228197247	99	8.06721354740247E-5	99	9.09232426087314E-5	99	-0.00104969211710237	99	-7.43276929689785E-4	99	0.00219943042732318
100	0.00139966076393439	100	5.07221453088569E-4	100	-0.00424530238842191	100	-8.36561729347984E-4	100	0.00229434663914674	100	0.00131047816478347	100	-3.22228320801088E-4	100	7.38973890300976E-4	100	-0.00211812136384104	100	-0.00109811425839368	100	0.00116907831338331	100	0.00275779653366559	100	0.00195836002492111	100	-0.00700142742302479	100	-3.0054154259318E-4	100	-4.79554159129592E-5	100	-9.76208052831495E-4	100	-7.95759858714717E-4	100	0.00199575984193245
101	0.00160690197930524	101	0.00159508622369131	101	-0.00327925857296218	101	-5.39315263047513E-4	101	0.00189091622864712	101	0.00234707918032928	101	-7.67162407834476E-4	101	-2.37253429026474E-4	101	-0.00143911388773255	101	-2.94675165362079E-4	101	0.00345671278223936	101	0.00500655926591165	101	0.00323075680605456	101	-0.00530198256407743	101	5.78244779339876E-4	101	9.83165925565466E-4	101	-1.72723988562495E-4	101	-8.5824278774016E-4	101	0.00255208925654049
102	-4.25856805323477E-4	102	-0.00516382754424782	102	-0.00417321475750221	102	-1.12068796745746E-4	102	0.00150748581814764	102	-7.96319804123868E-4	102	-0.00111209649486721	102	-0.00197348074835446	102	-4.40106411624619E-4	102	5.68763927669025E-4	102	0.00354434725109609	102	0.00188532199815761	102	0.00197315358718786	102	-0.003132537705131	102	0.00103703110127285	102	0.00248428726704386	102	0.00208076007570845	102	4.49274283235823E-4	102	-9.01581328850654E-4
103	-0.0017286155899523	103	-0.00777274131218775	103	-0.0116971709420426	103	-0.00492482233044456	103	-0.00758594459235251	103	-0.0117897187885774	103	-0.0103770305818998	103	-0.014559708067682	103	-0.00164109893551778	103	-0.0106377969792995	103	-0.00328801828004721	103	-0.0188059152695965	103	-0.00726444963167783	103	-0.00120309284618347	103	-2.14182576794286E-4	103	2.25408608521604E-4	103	0.00228424413997885	103	-0.00149320864578861	103	-0.00811525191424245
104	-0.00259137437458001	104	-0.00842165508012727	104	-0.0179428261212173	104	-0.0135973809889904	104	-0.022117410063113	104	-0.024311027437899	104	-0.0240723684274018	104	-0.0291554894593293	104	-0.00519164314848464	104	-0.0255203084198703	104	-0.0156736987930444	104	-0.0435356474173334	104	-0.0239181347161228	104	-6.84151391771692E-4	104	-0.00313475720419465	104	-0.00856371009941803	104	6.44701467761521E-4	104	-0.00734646374090886	104	-0.0153652586754314
105	-0.00152413315920885	105	-0.00865056884806581	105	-0.0244294595094239	105	-0.0230198274466904	105	-0.0360477442049323	105	-0.0367592957044378	105	-0.0382277212269218	105	-0.0439412543351363	105	-0.00922192924303999	105	-0.0421126698802041	105	-0.0304895020831459	105	-0.0689153238198852	105	-0.041272415425218	105	-0.00221549977633551	105	-0.00637496389333236	105	-0.0242159973206588	105	-0.00254495330580617	105	-0.0154497474347739	105	-0.0241455001097988
106	-0.00124689194383798	106	-0.00871948261600597	106	-0.0297860928976323	106	-0.0309422739043903	106	-0.0471680783467523	106	-0.048867563970977	106	-0.0504030740264403	106	-0.0558070192109428	106	-0.0132222153375956	106	-0.0575950313405373	106	-0.0425753053732478	106	-0.0938250002224352	106	-0.0555866961343119	106	-0.00435684816089843	106	-0.0100551705824712	106	-0.0433582845418981	106	-0.00934460807937487	106	-0.0229730311286396	106	-0.0326357415441665
107	0.00179251295326921	107	-0.00377839638394573	107	-0.0323227262858392	107	-0.0359547203620911	107	-0.0561784124885722	107	-0.0528758322375165	107	-0.0582584268259598	107	-0.0615927840867503	107	-0.0173025014321508	107	-0.0681473928008716	107	-0.0500511086633502	107	-0.108694676624987	107	-0.0644309768434068	107	-0.0079481965454633	107	-0.0129453772716088	107	-0.0625105717631387	107	-0.019444262852943	107	-0.0298763148225047	107	-0.0356859829785332
108	0.00391263907761985	108	-0.00121521508486477	108	-0.0271493596740457	108	-0.03618716681979	108	-0.053768746630392	108	-0.046774100504055	108	-0.0547937796254798	108	-0.0542985489625574	108	-0.0199927875267063	108	-0.0647997542612044	108	-0.0503569119534522	108	-0.0992343530275379	108	-0.0634352575525021	108	-0.0125995449300262	108	-0.0144555839607472	108	-0.0755028589843798	108	-0.0285639176265109	108	-0.0322895985163694	108	-0.0340062244129005
109	0.00476276520197061	109	-0.0014508605482515	109	-0.020595993062253	109	-0.0317196132774908	109	-0.0422090807722109	109	-0.0373523687705948	109	-0.0431991324249994	109	-0.0433743138383642	109	-0.0197130736212614	109	-0.0549121157215389	109	-0.0424727152435551	109	-0.0840340294300885	109	-0.0534795382615965	109	-0.0173308933145897	109	-0.0128757906498853	109	-0.0809551462056204	109	-0.0345035724000793	109	-0.0304828822102339	109	-0.0318164658472684
110	0.00470289132632118	110	-0.00259650601163841	110	-0.0147427952285319	110	-0.0248720146391284	110	-0.0309091575252536	110	-0.0287795614899329	110	-0.0302146726740915	110	-0.0297205250705614	110	-0.0177333137738094	110	-0.0409330668645147	110	-0.0307099753556708	110	-0.0658135289774346	110	-0.0422600159496227	110	-0.0186822535271887	110	-0.010325937031185	110	-0.0771787895771192	110	-0.0376744299502141	110	-0.0263665835478433	110	-0.0260995353900801
111	0.00356301745067267	111	-0.00535215147502566	111	-0.0098816227316787	111	-0.0197138748480183	111	-0.0235161456129545	111	-0.0203653201463352	111	-0.0198504628559482	111	-0.0199173314446135	111	-0.0151230026222722	111	-0.026902137584349	111	-0.0198991778971394	111	-0.0483827927178391	111	-0.0342687562762247	111	-0.0180137556762094	111	-0.00787535971842956	111	-0.0673487067517273	111	-0.0345068912024358	111	-0.0215608417437778	111	-0.0227663757441512
112	0.00202314357502331	112	-0.00461779693841269	112	-0.0068704502348238	112	-0.0153757350569084	112	-0.018123133700656	112	-0.0147510788027381	112	-0.0136362530378049	112	-0.0155141378186654	112	-0.0128026914707347	112	-0.0180312083041816	112	-0.0114383804386078	112	-0.0353820564582445	112	-0.0294974966028256	112	-0.0159452578252299	112	-0.00672478240567376	112	-0.0573986239263355	112	-0.0269093524546582	112	-0.0195150999397127	112	-0.0206732160982224
113	0.00143326969937441	113	-0.00580344240179898	113	-0.00531927773797047	113	-0.0116675952657985	113	-0.015160121788357	113	-0.011106837459141	113	-0.0106120432196608	113	-0.0128009441927164	113	-0.00929238031919688	113	-0.0111502790240143	113	-0.003807582980075	113	-0.0271413201986501	113	-0.0253262369294269	113	-0.0130367599742502	113	-0.00494420509291782	113	-0.0468585411009421	113	-0.0201618137068804	113	-0.0176993581356477	113	-0.0186200564522938
114	8.0628332552557E-4	114	-0.0063983114626236	114	-0.00509810524111654	114	-0.00830945547468875	114	-0.0157471098760587	114	-0.00922259611554388	114	-0.011047833401518	114	-0.0118177505667685	114	-0.00617206916765944	114	-0.00733934974384809	114	-7.26785521544038E-4	114	-0.0221705839390545	114	-0.0227049772560273	114	-0.00826826212327081	114	-0.0045836277801623	114	-0.0360784582755507	114	-0.0162542749591017	114	-0.0153036163315816	114	-0.0174668968063658
115	-5.30703048323922E-4	115	-0.00632076958917249	115	-0.00543693274426271	115	-0.00607131568357833	115	-0.0159440979637591	115	-0.00778835477194662	115	-0.0117636235833745	115	-0.0113045569408197	115	-0.00362175801612175	115	-0.00542842046368097	115	-4.65988063012901E-4	115	-0.0194998476794597	115	-0.0203737175826282	115	-0.00378976427229194	115	-0.00513305046740609	115	-0.0279483754501584	115	-0.0126067362113238	115	-0.0139178745275172	115	-0.0190037371604364
116	2.31057782684729E-6	116	-0.00456322771572104	116	-0.0058457602474089	116	-0.00485317589246748	116	-0.0161710860514601	116	-0.00783411342834928	116	-0.0126494137652307	116	-0.0103913633148718	116	-0.00342144686458479	116	-0.00574749118351381	116	-0.00225519060448054	116	-0.0188191114198641	116	-0.0176924579092299	116	-0.00226126642131241	116	-0.00584247315465003	116	-0.0233482926247666	116	-0.0102991974635449	116	-0.0124721327234516	116	-0.0180805775145076
117	4.53242039775148E-5	117	-0.00374568584227131	117	-0.00642547605117016	117	-0.00656458666201054	117	-0.0158662071200322	117	-0.0088084891041964	117	-0.0130756112313577	117	-0.00950044620076262	117	-0.00287088182796147	117	-0.00476443480457256	117	-0.00473739333470302	117	-0.0182990324924619	117	-0.0153921299439759	117	-6.52515260279429E-4	117	-0.00557160455655303	117	-0.0194439424224582	117	-0.00960386749838715	117	-0.0101574160394033	117	-0.0164133381724074
118	5.68337830127774E-4	118	-0.00229814396881967	118	-0.00643601435550067	118	-0.00637558128400872	118	-0.0141795994671874	118	-0.00897269882237683	118	-0.0126418575715981	118	-0.00899980226807351	118	-0.0021900817125573	118	-0.00408112317377807	118	-0.00640995608757589	118	-0.0177990324449215	118	-0.0143931137837008	118	2.86470447099951E-4	118	-0.00488046624980765	118	-0.0176441594637469	118	-0.00713880258714283	118	-0.00831282236975728	118	-0.0147568092667667
119	-5.18648543721412E-4	119	-2.00602095368652E-4	119	-0.00671655265983162	119	-0.00667657590600701	119	-0.0115229918143429	119	-0.00839690854055597	119	-0.0108881039118387	119	-0.00818915833538547	119	-0.00222928159715163	119	-0.00244781154298312	119	-0.00646251884044879	119	-0.0157590323973817	119	-0.0128440976234243	119	0.00132545615447821	119	-0.00410932794306085	119	-0.0183943765050358	119	-0.00329373767589924	119	-0.00715822870011085	119	-0.0126902803611264
120	-5.94912393916402E-4	120	0.00121693977808235	120	-0.00666709096416263	120	-0.00697757052800441	120	-0.00874638416149764	120	-0.0070911182587361	120	-0.00907435025207803	120	-0.00792851440269704	120	-0.00267848148174643	120	-0.00166449991218975	120	-0.00548508159332251	120	-0.0135890323498424	120	-0.0108750814631478	120	0.00299444186185749	120	-0.00232818963631498	120	-0.0172245935463247	120	-5.38672764655246E-4	120	-0.00574363503046538	120	-0.0102237514554862
121	-8.89008673147451E-4	121	-1.52889882286011E-4	121	-0.00600762926849274	121	-0.00693856515000313	121	-0.00740977650865293	121	-0.00521532797691648	121	-0.00737059659231765	121	-0.00797787047000842	121	-0.00233768136634183	121	-3.61188281394753E-4	121	-0.00516764434619521	121	-0.0104090323023023	121	-0.00991606530287203	121	0.00536342756923691	121	-0.00134705132956814	121	-0.0149048105876135	121	3.96392146589264E-4	121	-0.00439904136081815	121	-0.0084872225498458
122	-5.23104952377729E-4	122	-0.00127224163971107	122	-0.00498816757282405	122	-0.00593955977200089	122	-0.00598316885580896	122	-0.00315953769509658	122	-0.00554684293255736	122	-0.00741722653731891	122	-0.00183688125093706	122	4.12123349399884E-4	122	-0.00522020709906812	122	-0.00787903225476239	122	-0.00874704914259627	122	0.00507241327661578	122	-0.00136591302282163	122	-0.0128650276289015	122	0.00143145705783354	122	-0.00432444769117168	122	-0.00658069364420477
123	-0.00169720123160833	123	-0.00257159339713731	123	-0.00522870587715385	123	-0.00587055439399897	123	-0.00572656120296422	123	-0.00288353731816571	123	-0.00458325889223676	123	-0.00669803185044238	123	-0.00297608113553149	123	7.85961394749179E-4	123	-0.0044239559845991	123	-0.00704970545231465	123	-0.00638161419972683	123	0.00466139898399476	123	-0.00289477471607569	123	-0.0113452446701903	123	0.00146575725678666	123	-0.00385032608108649	123	-0.00603654422458977
124	-0.0013312975108386	124	-0.00442094515456226	124	-0.00519042445786067	124	-0.00544044812659816	124	-0.00533625602418475	124	-0.00201715877003572	124	-0.00354998016690722	124	-0.00620144580602933	124	-0.00308491498008578	124	-1.59253013702454E-4	124	-0.00457983990891542	124	-0.00730159049103207	124	-0.00511262544818969	124	0.00246147072719616	124	-0.00274331142270778	124	-0.00849755528163776	124	2.88680973615563E-4	124	-0.00345705417820863	124	-0.00571667787982122
125	-0.00220539379006901	125	-0.00571029691198799	125	-0.00433219024962206	125	-0.00527029782362209	125	-0.0053158029443674	125	-9.00780221905428E-4	125	-0.00285670144157724	125	-0.00581485976161567	125	-0.00369373418303898	125	-3.44467422154437E-4	125	-0.00414572383323186	125	-0.00747347552975075	125	-0.00378363669665305	125	7.15859118312068E-5	125	-0.00303183512987371	125	-0.00703074963589234	125	5.16046904452949E-5	125	-0.0041237822753315	125	-0.00554681153505143
126	-0.00158949006929898	126	-0.00483964866941378	126	-0.00437395604138313	126	-0.00577014752064464	126	-0.00456534986455015	126	-6.14401673775689E-4	126	-0.00283342271624765	126	-0.00650827371720197	126	-0.00308255338599128	126	-9.69681830605751E-4	126	-0.00412160775754877	126	-0.00858536056846759	126	-0.00246464794511692	126	-1.38298903533673E-4	126	-0.00296035883704082	126	-0.0069439439901462	126	-3.75471592725773E-4	126	-0.00457051037245471	126	-0.00500694519028233
127	-0.00106214000480964	127	-0.00386764287492447	127	-0.00416572183314479	127	-0.00547999721766868	127	-0.00426489678473274	127	-0.00112802312564497	127	-8.70143990917782E-4	127	-0.00599168767278702	127	-0.00360137258894433	127	-0.00154489623905896	127	-0.00401749168186516	127	-0.00906724560718519	127	-0.00135565919357905	127	3.61816281100324E-4	127	-0.00160888254420666	127	-0.00682713834440118	127	-0.00166254787589626	127	-0.00380723846957665	127	-0.00543707884551292
128	-1.53343596601907E-4	128	-0.00315396923094102	128	-0.00381748762490641	128	-0.00487984691469112	128	-0.00329444370491583	128	-4.81644577514651E-4	128	1.13134734411879E-4	128	-0.00533510162837381	128	-0.00243019179189563	128	-0.00181011064751058	128	-0.0043133756061815	128	-0.0079691306459031	128	-0.00162667044204312	128	-1.38068534264235E-4	128	0.00107259374862689	128	-0.00700033269865497	128	-0.00137962415906667	128	-0.00393396656669953	128	-0.00493721250074408
129	0.00154545281160612	129	-0.00199029558695774	129	-0.00256925341666836	129	-0.00470969661171505	129	-0.00239399062509893	129	-0.00126526602938437	129	-3.1358654025837E-4	129	-0.00447851558396017	129	-0.00117901099484907	129	-0.00115532505596239	129	-0.00448925953049795	129	-0.00703101568462117	129	-0.00159768169050611	129	0.00148204665036911	129	0.00233407004146002	129	-0.00760352705290934	129	-5.96700442237363E-4	129	-0.00319069466382249	129	-0.00417734615597443
130	0.00292424921981382	130	-0.00124662194297454	130	-0.00277131974010647	130	-0.00450897112558035	130	-0.00161188374948562	130	-0.00179919338585677	130	-6.90713362820006E-4	130	-0.00433650167939081	130	2.2227980965539E-4	130	-0.00136007488833378	130	-0.00427783949138849	130	-0.00615539290514455	130	-0.0017651093675477	130	0.00231287708616446	130	0.00437559276779087	130	-0.00876304352147628	130	-0.00153526232193624	130	-0.0016286511245065	130	-0.00255297876740102
131	0.00294304562802239	131	-0.00103294829899081	131	-0.00271382970554424	131	-0.00308739655954682	131	4.26644437316881E-5	131	-0.00201318724332911	131	1.62071652032303E-4	131	-0.00391548171826805	131	1.33733006119741E-4	131	-2.34723725905717E-4	131	-0.00378700554718669	131	-0.00417031190432127	131	-0.00169393192036615	131	0.00196476336891216	131	0.00578718403880707	131	-0.00913189263498104	131	-0.00139414715740127	131	-0.00177687462074783	131	-0.00110980680408712
132	0.00242184203623008	132	-0.00208927465500697	132	-0.0027263396709829	132	-0.00175582199351254	132	0.00112721263694837	132	-0.00100718110080233	132	-0.00141514333311488	132	-0.0037844617571432	132	0.00117518620258483	132	2.00627436522716E-4	132	-0.00367617160298561	132	-0.00304523090349651	132	-0.00237275447318552	132	0.00170664965165912	132	0.00660877530982429	132	-0.00925074174848461	132	-4.2303199286664E-4	132	-0.00223509811698897	132	3.23365159227151E-4
133	0.00262063844443805	133	-0.00290545001442499	133	-0.00172884963641984	133	-0.0014942474274795	133	0.00158176083016581	133	1.48825041724976E-4	133	-0.0011823583182613	133	-0.00357344179602048	133	8.46639399049387E-4	133	9.5978598951163E-5	133	-0.00298533765878339	133	-0.00322014990267405	133	-0.00139157702600379	133	0.00194853593440669	133	0.00640036658084142	133	-0.00799959086198854	133	-0.00125191682833226	133	-0.00259332161322945	133	2.36537122541236E-4
134	5.81606312840321E-4	134	-0.00301883193674612	134	-0.00174135960185762	134	-0.00177267286144556	134	0.00136630902338286	134	0.00152483118425284	134	-4.19573303409138E-4	134	-0.00390242183489686	134	2.48092595515281E-4	134	9.1132976137942E-4	134	-0.00185450371458096	134	-0.0027150689018498	134	-0.00116039957882386	134	0.00273042221715336	134	0.00523195785185848	134	-0.00679843997549323	134	-0.00136080166379671	134	-0.00301154510947033	134	-2.60290914145145E-4
135	2.93298001306397E-4	135	-0.00317221385906841	135	-0.00135386956729544	135	-0.00199109829541122	135	0.00136085721659907	135	0.00152083732677966	135	1.83211711444642E-4	135	-0.00389140187377279	135	-3.90454208019975E-4	135	0.00146668092380686	135	-0.00149366977037957	135	-0.00342998790102644	135	-0.00129922213164235	135	0.00440230849990009	135	0.00307354912287483	135	-0.00548728908899765	135	-8.09686499262163E-4	135	-0.00286976860571109	135	-5.87118950831744E-4
136	4.49896897745106E-5	136	-0.00153559578139095	136	-0.00142637953273361	136	-0.00116952372937806	136	0.00148540540981656	136	0.00221646259001673	136	5.58503015763989E-5	136	-0.00298240305120689	136	4.30998988444564E-4	136	0.00172193413795174	136	-0.00204376233727288	136	-0.00434610199581975	136	-0.00110964331302554	136	0.00386419478264788	136	0.00241514039389212	136	-0.00406613820250268	136	-6.48993023348865E-4	136	-0.00190846896808594	136	-0.00122586875952901
137	-4.63318621759079E-4	137	-4.98977703713877E-4	137	-0.00169911020456315	137	-0.00106650765468785	137	0.00232362997211766	137	0.00228113565502763	137	8.88122829906024E-4	137	-0.00258845707503408	137	-1.87408946697332E-4	137	0.00190694248138623	137	-0.00225617118190335	137	-0.00503520382965661	137	-4.06106581696264E-6	137	0.00382812259682908	137	0.0026666402551454	137	-0.00233203764376633	137	-8.8935376899002E-4	137	-3.78361495794621E-4	137	-0.0020894229982531
138	-0.00116162693329169	138	-3.62359626035591E-4	138	-0.00164188100482932	138	-5.53229487514351E-4	138	8.12522965161655E-4	138	7.95808720039481E-4	138	7.20395358235315E-4	138	-0.00291451109886154	138	-9.75791633039513E-4	138	0.00203195082482033	138	-0.00220858002653568	138	-0.0044543056634927	138	-0.00130847881860952	138	0.00591242159854488	138	0.00288812349644196	138	-0.00311921896280509	138	-2.99714514630622E-4	138	8.8174597649715E-4	138	-0.00263297723697864
139	-3.999352448254E-4	139	-7.757415483578E-4	139	-0.00142465180509443	139	1.20048679658424E-4	139	5.21415958204763E-4	139	-9.95182149488016E-5	139	6.52667886565261E-4	139	-0.00246056512268833	139	-0.00101417431938255	139	6.96959168255518E-4	139	-0.00171098887116639	139	-0.00445340749732992	139	-5.32896571400876E-4	139	0.00814672060026034	139	0.00366960673773953	139	-0.00274640028184425	139	-1.20075260269914E-4	139	1.21853448788123E-4	139	-0.00227653147570361
140	1.51756443641737E-4	140	-0.00129725120446267	140	-0.00207742260536037	140	7.43326846832204E-4	140	0.00106030895124842	140	5.25154850062215E-4	140	0.00146494041489476	140	-0.00165661914651594	140	1.87442994275422E-4	140	-2.58032488309468E-4	140	-0.00283339771579705	140	-0.00292250933116645	140	2.68567580796741E-6	140	0.00896101960197537	140	0.00493108997903668	140	-0.00274358160088362	140	2.19563994089178E-4	140	-6.58039078921036E-4	140	-0.00301008571442818
141	3.76346005186434E-4	141	-0.00222776966080485	141	-0.00112019340562508	141	0.00140660501400536	141	0.00161920194429221	141	5.79827915073494E-4	141	0.00124721294322416	141	-0.00119267317034311	141	-0.00101093969206723	141	-0.00202302414487487	141	-0.00256580656042793	141	-0.001481611165004	141	-3.81732076984775E-4	141	0.0108553186036904	141	0.00564257322033335	141	-0.00228076291992263	141	1.99203248448576E-4	141	-0.00156793160662971	141	-0.00333363995315317
142	1.70935566731423E-4	142	-0.00193828811714702	142	-1.32964205890929E-4	142	0.00218988318117841	142	0.00135809493733507	142	5.54500980085137E-4	142	7.09485471554139E-4	142	-0.00110872719417099	142	-0.00177932237841016	142	-0.00162801580144034	142	-0.00238821540505985	142	-3.70712998841505E-4	142	-6.16149829776091E-4	142	0.0130796176054071	142	0.00481405646163058	142	-0.00253794423896103	142	-9.11157497191617E-4	142	-0.00330782413433806	142	-0.00260719419187794
143	-3.44474871723399E-4	143	-0.00116880657348961	143	-3.25669439671827E-4	143	0.00283373335004988	143	0.00255831326295297	143	0.00184745122150076	143	8.13598056383924E-5	143	-0.00168106481782004	143	-4.77688958512523E-4	143	-6.23950422487418E-4	143	-0.0031928840966744	143	-4.33806319358965E-4	143	8.76895676499068E-4	143	0.0130647976666873	143	0.00364544421130475	143	-3.55416803717645E-4	143	-5.72375689453786E-4	143	-0.00331909865991076	143	-0.00187581694757011
144	-5.99885310179182E-4	144	-0.00127932502983175	144	-0.00127821294279062	144	0.00446899445644533	144	0.00280180074224923	144	0.00171982718838315	144	-1.36898591693857E-4	144	-0.00146549697474274	144	-7.96015809886974E-4	144	-2.10199365028529E-4	144	-0.00329830607061687	144	-7.582301354363E-4	144	0.0011690956024637	144	0.0119521510082272	144	0.00316659641497807	144	0.0057863922254251	144	-1.33879697256312E-4	144	-0.00339083385143635	144	-0.00134612920891719
145	-0.0017852957486344	145	-0.00119984348617397	145	-0.00106075644591019	145	0.00586425556284009	145	0.00322528822154666	145	0.00112220315526557	145	-3.25156989024578E-4	145	-0.00291992913166617	145	-0.0022643426612623	145	0.00101355169243078	145	-0.00332372804455972	145	-0.00205265395151333	145	0.00145129552842782	145	0.0106895043497683	145	0.00358774861865196	145	0.0135082012545658	145	-0.00119538370505889	145	-0.0021025690429628	145	-0.00113644147026459
146	-0.00130070618708888	146	-0.00183964851110741	146	-0.00139329994902937	146	0.00532951666923509	146	0.00176877570084422	146	6.94579122147765E-4	146	-6.43415386355706E-4	146	-0.00311436128858933	146	-0.00217266951263717	146	0.00105730274988947	146	-0.00288915001850309	146	-0.00304707776759194	146	0.00210349545439126	146	0.0104368576913094	146	0.00364890082232527	146	0.0210600102837084	146	-0.00122688771286139	146	-0.00190430423448884	146	-0.00124675373161232
147	-8.85391509068967E-4	147	-0.00162738458495681	147	-0.00152584345214901	147	0.00550477777562985	147	0.00116226318014245	147	5.26955089030778E-4	147	-0.00151167378368733	147	-0.00279879344551226	147	-0.00236099636401121	147	4.21053807348137E-4	147	-0.0024045719924457	147	-0.00337150158366928	147	0.00250569538035528	147	0.0102342110328486	147	0.00443005302599886	147	0.0296618193128504	147	2.16082793356165E-5	147	-5.36039426014767E-4	147	-0.00170706599296011
148	-3.67901481626909E-4	148	-6.65120658806195E-4	148	-0.00177838695526855	148	0.00529003888202517	148	0.0018257506594388	148	-3.90668944086237E-4	148	-5.89932181018327E-4	148	-0.00121322560243531	148	-0.00330932321538668	148	-2.45195135192944E-4	148	-9.69993966388749E-4	148	-0.00347592539974695	148	0.00241789530632008	148	0.00984156437438966	148	0.00569120522967204	148	0.0368136283419913	148	-8.69895728467185E-4	148	4.32225382458462E-4	148	-0.001487378254307
149	-7.04114541836276E-5	149	9.87143267344948E-4	149	-6.20930458387292E-4	149	0.00485529998841994	149	0.00257923813873617	149	8.09832814514522E-5	149	7.91693818056771E-4	149	-9.79391057880363E-4	149	-0.00272765006676234	149	-8.19381138832398E-5	149	-7.55771036429209E-4	149	-0.00278167687459874	149	0.00221979471814038	149	0.00874891771593056	149	0.00656235743334488	149	0.0369554373711329	149	-0.00123157106174787	149	0.00188005812746717	149	-0.00248914548205637
150	-1.92921426741322E-4	150	0.00231940719349577	150	0.00114707035673067	150	0.00427220797453121	150	0.00153626557046582	150	-1.80018211273669E-4	150	-2.37104062715154E-4	150	3.28088058761722E-4	150	-0.00180601524497881	150	-6.20492558454089E-4	150	4.87149874506265E-4	150	-0.00259229643162051	150	4.70592244768753E-4	150	0.00745897195181477	150	0.00682310475759529	150	0.0351618596747381	150	-2.73874588452294E-4	150	4.56306639773807E-4	150	-0.00185624758660907
151	-9.8543139929852E-4	151	0.00196167111964662	151	0.00161527171014519	151	0.00447972270580088	151	0.00293459719519529	151	8.98029600104877E-6	151	4.44098056513909E-4	151	9.95567175404055E-4	151	-0.00226439454361227	151	6.40952996976196E-4	151	0.0016500707854421	151	-0.00298291598864253	151	-4.58610228603717E-4	151	0.00609002125403713	151	0.00605370291574214	151	0.0314999816057764	151	-4.46178115154794E-4	151	1.02555152080797E-4	151	-0.00141334969116347
152	-2.2794137185489E-4	152	4.23935045797741E-4	152	0.00145347306356047	152	0.00379723743706961	152	0.00325292881992478	152	-1.62021196723927E-4	152	0.00256530017574175	152	0.00119304629204553	152	-0.00116277384224439	152	5.02398552406191E-4	152	0.00295299169637797	152	-0.00289353554566496	152	-7.17812701975795E-4	152	0.00507107055625955	152	0.00525430107388747	152	0.0264181035368143	152	-0.00116848164185868	152	-5.91196335612665E-4	152	-0.00186045179571614
153	-6.50451344412772E-4	153	-9.41502056128307E-4	153	0.00195167441697564	153	0.00400475216833929	153	0.00240126044465416	153	-8.33022689450402E-4	153	0.00275650229497071	153	0.0012105254086876	153	-5.11153140877241E-4	153	7.53844107835633E-4	153	0.00314591260731323	153	-0.0019441551026862	153	-0.00121701517534856	153	0.00502211985848078	153	0.00465489923203499	153	0.0217362254678521	153	-0.00158078516856097	153	-0.00184494782330624	153	-0.00250755390027102
154	-3.41510497754882E-4	154	-0.00264656171490252	154	0.00222987577039113	154	0.00373226689960848	154	0.00155959206938405	154	-7.44024182175451E-4	154	0.00166770441419928	154	0.00126800452532994	154	-1.09532439510396E-4	154	6.52896632660216E-5	154	0.00368883351824945	154	-0.00208477465970791	154	-0.00250621764871983	154	0.00559316916070252	154	0.00375549739018055	154	0.0187043473988906	154	-0.00160308869526471	154	-0.00293869931099966	154	-0.00191465600482488
155	3.6888116811884E-4	155	-0.00255162137367648	155	0.00101807712380619	155	0.00381978163087737	155	0.00229792369411452	155	1.54974325099033E-4	155	0.00202890653342713	155	0.00117548364197084	155	3.20882618565221E-5	155	4.86735218696133E-4	155	0.0047417544291859	155	-0.00124539421672942	155	-9.75420122092174E-4	155	0.00655421846292459	155	0.00231609554832701	155	0.0164224693299291	155	4.54607778031857E-4	155	-0.0024524507986925	155	-0.00305175810937808
156	2.09272833991747E-4	156	-0.00144668103245049	156	5.86496514650037E-4	156	0.0030077042382084	156	0.00162713583973861	156	7.9093404274122E-4	156	0.00112972087284913	156	0.00120830501371572	156	6.83681144659332E-4	156	2.35752667171241E-4	156	0.00468453148691417	156	0.00100964557599248	156	-0.00103446076751279	156	0.00734601850041283	156	9.36559216456523E-4	156	0.0154229512436697	156	0.00242203357873105	156	-0.00169768830930828	156	-0.00355348920007437
157	9.9664499864538E-5	157	-5.11740691225171E-4	157	-5.40423601202988E-5	157	0.00295757558672261	157	9.60554918525425E-4	157	0.0012554543337151	157	0.0014103515270989	157	0.00125892008524531	157	-4.85888345558294E-6	157	9.23619959721123E-4	157	0.00524724040364788	157	0.00148262927122467	157	-9.83424757587059E-4	157	0.00821140538417264	157	5.63803211717229E-5	157	0.01514470863032	157	0.00416933116609552	157	-6.03629725518751E-4	157	-0.00422741296841789
158	2.50056165738144E-4	158	-3.2680034999899E-4	158	-7.04581234890256E-4	158	0.00237744693523556	158	8.53973997312352E-4	158	0.00186997462468952	158	0.00132098218134757	158	6.49535156774128E-4	158	-0.00111339891157147	158	3.1148725227137E-4	158	0.00507994932038258	158	5.85612966458093E-4	158	-7.23887476619112E-5	158	0.00883679226793266	158	-8.13798574111679E-4	158	0.0140264660169693	158	0.00659662875345823	158	-1.9957114172886E-4	158	-0.0035613367367624
159	-1.99552168389516E-4	159	9.93391191315141E-5	159	-0.0012351201096612	159	0.00176731828374876	159	0.00153739307610046	159	0.00134449491566357	159	0.00199161283559679	159	2.20150228304128E-4	159	-0.0028419389396861	159	9.09354544821106E-4	159	0.00439265823711832	159	5.28596661690806E-4	159	0.00140864726226386	159	0.00901217915169195	159	-0.00107397746939686	159	0.0129382234036193	159	0.00752392634082266	159	-1.25512557938023E-4	159	-0.00333526050510624
160	3.20839497483405E-4	160	-0.00107312242918045	160	-0.00125565898443103	160	0.00164718963226296	160	7.40812154887749E-4	160	3.790152066383E-4	160	0.00243224348984672	160	7.60765299832933E-4	160	-0.00331047896780223	160	6.47221837370537E-4	160	0.00276536715385234	160	5.71580356924173E-4	160	0.0018296832721898	160	0.00843756603545209	160	-0.00140415636468028	160	0.0120399807902691	160	0.005031223928186	160	1.88546025852609E-4	160	-0.00241918427344867
161	0.00102338932790058	161	-4.55583977493568E-4	161	-0.00152619785920205	161	0.00252706098077571	161	5.74231233674283E-4	161	-1.16464502387892E-4	161	0.00387287414409609	161	3.13803713627436E-5	161	-0.00366901899591721	161	0.0013850891299203	161	0.00236807607058687	161	-7.35435947842866E-4	161	0.0019907192821158	161	0.00808295291921191	161	-0.00110433525996445	161	0.0112517381769193	161	0.00335852151554938	161	2.60460964263132E-6	161	-0.0020031080417926
162	5.76658546497022E-4	162	-9.78045525805271E-4	162	-9.8673673397176E-4	162	0.00370693232928954	162	8.47650312461923E-4	162	-4.82829313951605E-4	162	0.0028534026372764	162	1.91037014006135E-4	162	-0.00286755902403257	162	0.00151220208017833	162	9.3065468284248E-4	162	-0.001193357601732	162	0.00183204500718848	162	0.00715833980297109	162	-0.00100451415524816	162	0.00981349556356914	162	0.00284578090808729	162	-0.00100367445811944	162	-0.00117801087933334
163	0.00134992776509435	163	-3.20507074118126E-4	163	-0.00106619287656873	163	0.00483810657728245	163	0.00177433285885087	163	-3.84504740748248E-4	163	0.00253331816404678	163	6.44943083343286E-4	163	-0.00197624654381734	163	0.00143478897668814	163	-8.75485317779479E-5	163	-9.26711350346388E-4	163	0.00103510902314419	163	0.00557679081128182	163	-0.00152530847289256	163	0.00888806502613448	163	0.00243281113166649	163	-0.00129197943519621	163	-0.00179878813204937
164	0.00172319698369083	164	5.2703137756982E-4	164	-0.00127497231155527	164	0.0057500951374525	164	0.00211305507249104	164	-2.61801675440765E-5	164	0.00152323369081664	164	0.00104884915267967	164	-9.55026245894608E-4	164	7.47375873198841E-4	164	-6.6575174639727E-4	164	1.09934901039388E-4	164	-8.81826960900334E-4	164	0.00436715689743572	164	-0.00143648742951008	164	0.00850064203614576	164	0.00100984135524484	164	-5.40284412272385E-4	164	-0.00225956538476613
165	0.0010564662022885	165	7.84736903444383E-4	165	-0.00102375174654323	165	0.00607208369762091	165	0.00184177728613122	165	6.92144405660677E-4	165	0.00145314921758644	165	7.27552220158856E-5	165	-9.83805947972094E-4	165	2.79962769709208E-4	165	-4.63954961017699E-4	165	-6.33418847574951E-4	165	-0.00106876294494462	165	0.00442752298358862	165	-0.00102766638612817	165	0.0084132190461581	165	0.00122687157882417	165	-3.88589389348049E-4	165	-0.0018203426374841
166	5.79735420886074E-4	166	2.84881712456553E-4	166	6.374688184696E-4	166	0.00629407225778955	166	0.00201049949977072	166	6.40468978864384E-4	166	0.00108306474435604	166	2.6666129135311E-4	166	2.47414349949793E-4	166	-1.17450333780411E-4	166	-5.12158175636657E-4	166	-9.46772596189582E-4	166	-1.05698928988929E-4	166	0.00432788906974313	166	-5.68845342746371E-4	166	0.00825579605617044	166	0.00110390180240305	166	-9.66894366424498E-4	166	-0.00145111989020119
167	5.23004639482849E-4	167	0.00150502652146933	167	9.48689383482915E-4	167	0.00483606081795873	167	0.00294922171341128	167	9.68793552068803E-4	167	9.72980271127355E-4	167	-6.49432639310277E-4	167	1.48634647872292E-4	167	-0.0013548634372702	167	-1.50361390256037E-4	167	-4.20126344804039E-4	167	8.37365086966635E-4	167	0.00325825515589706	167	-4.10024299363876E-4	167	0.00910837306618184	167	7.60932025981376E-4	167	-0.00114519934350099	167	-0.00118189714291894
168	-2.50996332922249E-4	168	0.00206517133048134	168	0.00175990994849595	168	0.00426804937812708	168	0.00289794392705112	168	0.00106711812527305	168	7.0289579789673E-4	168	-0.00184552656997461	168	-8.70145054205018E-4	168	-0.00231227654076083	168	4.01435395123606E-4	168	-8.33480093418437E-4	168	8.50429102921879E-4	168	0.00295862124205026	168	9.88796744017861E-4	168	0.0104609500761939	168	3.079622495612E-4	168	-9.63504320576902E-4	168	-5.2267439563547E-4
169	-4.9973053259933E-6	169	0.00131531613949321	169	0.00117126237739473	169	0.00330012085824638	169	0.00225698209582514	169	0.00126009532583726	169	9.42209150657014E-4	169	-0.00212586768447931	169	-0.00152892799890836	169	-0.00195418848318596	169	7.31550254001512E-4	169	-0.00126059427193503	169	0.0033355854038879	169	0.0029393116064691	169	0.00210754722571416	169	0.0115448452689124	169	0.00123463714006622	169	-0.0012933497363905	169	-0.00122763201207654
170	-1.98998277730844E-4	170	0.00148546094850577	170	8.44768583084132E-4	170	0.00256354669754444	170	0.00159118086513299	170	4.09612461752751E-4	170	9.41132861412619E-4	170	-0.00211895697676479	170	-0.00181776390649535	170	-0.00261901143904097	170	0.00108057680749596	170	-8.90141669798616E-4	170	0.0036420955363301	170	0.00359529851587315	170	0.00188514519985805	170	0.0107902707791681	170	0.00116108210917165	170	-0.00112419190668245	170	-0.00153529456975043
171	-4.32999250134181E-4	171	0.00144560575751829	171	-4.8172521122769E-4	171	-2.83027463157559E-4	171	7.05379634440284E-4	171	9.12959766719013E-6	171	7.20056572166783E-4	171	-0.00250204626905148	171	-0.00231659981408328	171	-0.00324383439489484	171	7.69603360989635E-4	171	3.20310932336199E-4	171	0.00361860566877148	171	0.00513128542527763	171	0.0031027431740025	171	0.00918569628942389	171	0.00111752707827684	171	-4.50340769750923E-5	171	-0.00153295712742452
172	4.29997774604729E-5	172	0.00254744874329393	172	-0.00158821900553807	172	-0.00223960162385861	172	-4.80421596252611E-4	172	6.08646733582852E-4	172	3.98980282922068E-4	172	-0.00231513556133756	172	-0.00225543572167108	172	-0.00305865735074917	172	4.88629914483951E-4	172	0.00109076353447168	172	0.00274511580121306	172	0.00696727233468319	172	0.00485034114814731	172	0.00750112179967921	172	5.13972047381905E-4	172	0.00134412375273296	172	-0.00188061968509956
173	5.48998805055767E-4	173	0.00154014081745135	173	-0.00244471279984815	173	-0.00449617578456074	173	-8.46222826944576E-4	173	1.78163869497538E-4	173	9.57903993676901E-4	173	-0.00131822485362409	173	-6.84271629258326E-4	173	-0.00221348030660451	173	-2.22343532022329E-4	173	0.00297121613660778	173	0.00284162593365522	173	0.00792325924408743	173	0.00557793912229165	173	0.0051865473099344	173	-1.09582983513157E-4	173	0.00110328158244144	173	-0.00245828224277389
174	9.15614063528025E-4	174	0.00102283289160976	174	-0.00199120659415897	174	-0.00651274994526219	174	-7.02024057637196E-4	174	5.7681005412924E-5	174	0.00120682770443192	174	-9.01314145909105E-4	174	3.46892463154447E-4	174	-0.0012083032624588	174	-4.53316978527241E-4	174	0.00309166873874389	174	8.98136066097344E-4	174	0.00721924615349234	174	0.00520553709643679	174	0.00236197282019113	174	-9.83138014407636E-4	174	0.00157243941214968	174	-0.00139594480044725
175	0.00192407801462924	175	0.00115552496576754	175	-0.00147770038846939	175	-0.00750932410596494	175	6.22174711669921E-4	175	-5.23681911374752E-4	175	6.356554019602E-4	175	6.25168541926513E-4	175	0.0011180565555664	175	1.46265152976E-4	175	-0.00143463099772401	175	0.00385168925496071	175	-4.55067667897602E-4	175	0.00600523306289791	175	0.00556313507058093	175	0.00120739833044592	175	-0.00118676765924164	175	4.31403611460546E-4	175	-0.00160410143851752
176	0.00165254196572917	176	0.00130821703992545	176	-8.82784483164478E-4	176	-0.00675561461570595	176	0.00202917810431114	176	-0.0012264855132873	176	8.03234927547081E-4	176	0.0016360869713532	176	8.09538984133162E-4	176	7.02921395161482E-4	176	-7.60372461894754E-4	176	0.00275609265423693	176	-8.44551665565518E-4	176	0.00373435119435506	176	0.00420001000615322	176	3.08469225585917E-4	176	-0.00152136728528074	176	-1.6214938439596E-4	176	-0.00268868112173326
177	4.71005916829803E-4	177	3.40909114083132E-4	177	6.3354112175773E-4	177	-0.00497162147448904	177	0.00254898612028587	177	-0.00279928911520066	177	0.00130081445313301	177	0.00174700540078021	177	-4.86602511466927E-5	177	0.00132957763734698	177	-9.76113926065558E-4	177	0.00167049605351188	177	-0.00124403566323483	177	0.00208660054786769	177	0.0023761619031557	177	-0.00121481449438843	177	-0.0011659669113202	177	-0.00107570238025367	177	-0.00312326080494874
178	-1.50530132070337E-4	178	4.94222645030185E-4	178	0.00148986672667917	178	-0.00377762833327022	178	0.0023387941362607	178	-0.00285209271711473	178	6.28393978718833E-4	178	0.00116792383020581	178	-3.76859486427072E-4	178	8.56233879533264E-4	178	-0.00143185539023616	178	1.94899452788277E-4	178	-0.00207351966090297	178	0.00133884990137823	178	8.62313800157111E-4	178	-0.00204809821436314	178	-5.30566537357835E-4	178	-4.5925537611069E-4	178	-0.00218784048816367
179	-9.62066180969501E-4	179	8.09222987258273E-4	179	0.00112619233160061	179	-0.00287363519205286	179	0.00159860215223517	179	-0.00364489631902831	179	0.00121597350430491	179	6.78842259632439E-4	179	4.0494127829227E-4	179	-1.87109878281078E-4	179	-0.00158759685440746	179	-0.00117069714793683	179	-0.0015630036585712	179	0.00206109925488995	179	6.3846569715853E-4	179	-0.00256138193433753	179	-1.55166163397169E-4	179	-1.22808371967764E-4	179	-0.00220242017137906
180	-6.13602229869059E-4	180	9.84223329485445E-4	180	4.82517936522875E-4	180	-0.00256964205083499	180	7.68410168209499E-4	180	-0.00323769992094114	180	0.00243355302989112	180	-6.90239310940477E-4	180	0.00143674204301281	180	-5.30453636095274E-4	180	-0.00142333831857755	180	-0.00107629374866214	180	-7.22487656240389E-4	180	0.00156334860840168	180	2.64617594160299E-4	180	-0.00324466565431258	180	4.0234210564094E-5	180	8.33638632175671E-4	180	-0.00145699985459391
181	8.75904984044773E-4	181	0.00132922367171506	181	-2.91156458555264E-4	181	-0.00180564890961765	181	5.78218184184465E-4	181	-0.00208050352285483	181	0.00231113255547744	181	-0.00138932088151478	181	0.00105854280773343	181	-0.00120379739390941	181	-0.00201907978274818	181	-5.1890349386241E-5	181	-2.51971653908001E-4	181	0.001545597961913	181	4.00769491162301E-4	181	-0.00340794937428779	181	6.85634584525197E-4	181	-1.69914363682189E-4	181	-3.11579537808804E-4
182	0.00237645546077037	182	6.04224013942556E-4	182	-2.94830853633243E-4	182	-0.00232165576840071	182	-5.41973799840889E-4	182	-0.00177073344922718	182	0.00178776611082831	182	-0.00116080560785203	182	0.00108034357245312	182	-0.00250189163955916	182	-0.00219822365141997	182	6.49145033973397E-4	182	6.40796070543459E-4	182	8.87847315424573E-4	182	0.00123692138816356	182	-0.00251123309426227	182	3.50251337744467E-4	182	-0.00129501260485032	182	0.001300118129266
183	0.00220700593749701	183	3.19224356172043E-4	183	1.12470996431746E-4	183	-0.00239755532471975	183	-0.00106677956730383	183	-0.00144739952346562	183	0.00220357982530928	183	-0.0010943730691837	183	9.334451930334E-4	183	-0.00255410297466696	183	-0.00238031627065816	183	8.17261470205999E-4	183	0.00197551528750051	183	5.66024224584183E-5	183	0.00167149492284846	183	-0.00168834794613826	183	-4.45811047011802E-4	183	-0.00195145005862241	183	9.38589499925868E-4
184	0.0019975564142225	184	7.34224698399899E-4	184	9.50648943138788E-4	184	-0.0029134483115012	184	3.87444335938625E-5	184	-0.0012640655977032	184	0.00158939353979015	184	-0.00103794053051587	184	-4.33735421507819E-5	184	-0.00277631430977454	184	-0.00232240888989743	184	0.00132537790643816	184	0.00291023450445671	184	2.8575584093371E-4	184	0.00147597182310388	184	-8.1569735710918E-4	184	8.12656823168112E-6	184	-0.00293788751239443	184	2.6706087058681E-4
185	3.58106890948839E-4	185	4.00920356228518E-4	185	9.7882688984452E-4	185	-0.00333934129828339	185	9.54268434492533E-4	185	-0.00142073167194123	185	0.00141520725427213	185	1.08492008152439E-4	185	-9.60192277334571E-4	185	-0.00202852564488154	185	-0.0018245015091356	185	9.63494342670401E-4	185	0.00321495372141278	185	3.49092594094103E-5	185	2.20448723361244E-4	185	4.36953231919723E-4	185	6.62064183475586E-4	185	-0.00255432496616592	185	-8.94467758753237E-4
186	-7.21342632324706E-4	186	-1.22134674824359E-4	186	0.00134700483655159	186	-0.00292523428506453	186	5.69792435389793E-4	186	-0.00271739774617963	186	0.00158102096875279	186	3.04924546821184E-4	186	-0.00148701101251802	186	-0.00106073697998887	186	-0.00271659412837444	186	3.71610778902465E-4	186	0.00348967293836999	186	3.34062677883828E-4	186	-6.15074376382196E-4	186	4.19603820947856E-4	186	-2.53998201280581E-4	186	-0.00120076241993772	186	-0.00126599638809299
187	-0.0013507921555993	187	1.64810294122297E-4	187	5.55182783258168E-4	187	-0.00212112727184621	187	0.00148531643628758	187	-0.00237406382041705	187	0.00248683468323296	187	6.13570854888223E-5	187	-0.00112382974770142	187	1.07051684902437E-4	187	-0.00342868674761387	187	-4.02727848642925E-5	187	0.00266439215532621	187	0.00125321609635876	187	-0.00221059747612617	187	1.3225440997644E-4	187	-8.10060586037054E-4	187	8.82800126289496E-4	187	-0.00185752501743153
188	-7.49072728996047E-4	188	-2.08244736931817E-4	188	1.53360729964191E-4	188	-0.00275702025862756	188	0.00290084043718597	188	-0.00164072989465591	188	0.00173264839771381	188	-2.62210375842287E-4	188	-0.00139064848288584	188	-5.15965020486675E-6	188	-0.0018707793668522	188	-1.62156348632259E-4	188	0.00153911137228313	188	0.00122236951483412	188	-0.0048061205758696	188	-5.1509500099467E-4	188	-0.00133612297079377	188	0.00152636267251705	188	-0.00198905364677238
189	-4.069636524342E-4	189	-0.00138129976798407	189	-9.91803822372184E-4	189	-0.00186291124962512	189	0.00159859585599431	189	6.12955195578024E-5	189	0.00212616255673925	189	2.11544775291728E-4	189	-0.00165667583372908	189	8.14234326471208E-4	189	-0.00152960366157195	189	-5.80718654418E-4	189	0.00108785632791708	189	-8.55748798374023E-5	189	-0.0067723714696033	189	-7.08871327465666E-4	189	-0.00119403257223016	189	0.00147686712848127	189	-5.97563015956482E-4
190	2.3514542412606E-4	190	-0.00125435479903757	190	-2.70316373176094E-4	190	-0.00127879904736883	190	0.00147992154346088	190	0.00183332093377064	190	0.00280967671576526	190	-6.14700073573893E-4	190	-0.00273143696962919	190	5.36283031467022E-5	190	-0.0014984279562924	190	-8.92809602053291E-5	190	8.26601283551831E-4	190	2.11124224457571E-4	190	-0.00633978683372405	190	-0.00277293071873785	190	-0.00164194217366553	190	3.07371584444383E-4	190	-1.16072385138999E-4
191	-3.02745499311641E-4	191	-5.26677545087395E-4	191	-1.88289239808626E-5	191	-5.14686845112244E-4	191	9.01247230926217E-4	191	0.00294534634798449	191	0.00302319087479042	191	-5.60944922439965E-4	191	-0.00187619810552864	191	-8.96977720177716E-4	191	-6.6725225101294E-4	191	9.22156734008972E-4	191	7.15346239185344E-4	191	-5.021766712483E-4	191	-0.0059072021978448	191	-0.00350699011000977	191	-4.69851775101837E-4	191	-9.21239595914614E-5	191	-2.84581754322666E-4
192	-8.7063642275087E-4	192	-0.00173818884018662	192	6.12658525214194E-4	192	2.09425357143189E-4	192	0.00155257291839295	192	0.00259737176219765	192	0.00250670503381567	192	-1.97189771305339E-4	192	-0.00159095924142871	192	-0.0010875837435016	192	5.53923454266858E-4	192	0.00171359442822183	192	0.00104409119482085	192	-6.15477566952904E-4	192	-0.00471461756196501	192	-0.00412104950128178	192	-9.77761376538488E-4	192	-6.71619503628484E-4	192	-5.03091123507105E-4
193	-7.68527346188819E-4	193	-0.00130970013528664	193	6.04145974410386E-4	193	0.00216353755940002	193	2.53898605858893E-4	193	0.00108939717641121	193	8.60219192841072E-4	193	5.06565379828849E-4	193	-5.85720377329402E-4	193	3.51810233174099E-4	193	4.50991595464245E-5	193	0.00213503212243626	193	0.00130283615045457	193	6.41221537341252E-4	193	-0.00305203292608436	193	-0.00440510889255386	193	-0.00164567097797441	193	-2.11150476641109E-5	193	-4.1600492690641E-5
194	-3.16418269627583E-4	194	2.38788569614456E-4	194	0.00150563342360588	194	0.00300764976165624	194	4.95224293325158E-4	194	-5.28577409376396E-4	194	-0.00294626664813347	194	6.90320530963184E-4	194	-1.8048151322958E-4	194	1.21204209849068E-4	194	-4.13725135174126E-4	194	0.00253646981665057	194	2.81581106089668E-4	194	0.00212792064163558	194	-0.00185944829020457	194	-0.00431916828382573	194	-0.00285358057941032	194	7.69389408299404E-4	194	-0.00104010986187486
195	-3.63283537402559E-4	195	-2.52722725485377E-4	195	0.00113712087280149	195	0.00318176196391207	195	4.56549980790477E-4	195	-0.00164010411238191	195	-0.00690411189765339	195	8.83764904179074E-4	195	2.44757350870373E-4	195	3.57169515892153E-4	195	-5.25350607362363E-4	195	0.00181454905062672	195	-0.00134830580317225	195	0.00291461974593066	195	-0.0010468636543246	195	-0.00372322767509825	195	-0.00272246925304387	195	0.00108839218412093	195	-0.00170182238873995
196	6.98511948211689E-5	196	-0.00109423402058351	196	7.98603244669849E-4	196	0.00225590985808033	196	0.00105271846737853	196	-0.00171572941217946	196	-0.0109635256954945	196	0.00170685068749066	196	3.32750437543439E-4	196	6.59178663513948E-4	196	-2.20208207398542E-4	196	8.28753138175209E-4	196	-0.00171661409500423	196	0.00358808912305353	196	-0.00157581482153457	196	-0.00273874406492958	196	-0.00243248762536741	196	2.95662252085549E-4	196	-0.00234723086677668
197	7.52985927045202E-4	197	-0.00126565059826778	197	8.47991530585901E-4	197	0.00103006522264693	197	0.00164990056308412	197	-0.0016113547119776	197	-0.0131329394933362	197	0.0023799364708017	197	5.81319989406026E-4	197	7.41187811134303E-4	197	-3.85065807434692E-4	197	5.29572257246258E-5	197	-0.00106492238683842	197	0.00359297553402538	197	-0.00281508743590209	197	-0.00237875145445976	197	-6.42505997690002E-4	197	6.22932320052172E-4	197	-0.00179263934481266
198	9.1612065927027E-4	198	-0.00151593056696608	198	0.00119737981650125	198	1.2422058721473E-4	198	0.00290708265878958	198	-9.06980011774472E-4	198	-0.0128723532911765	198	0.00300302225411198	198	3.69889541268265E-4	198	5.43196958755487E-4	198	-7.5992340746911E-4	198	5.27161313272906E-4	198	-0.00154323067867068	198	0.00272786194499552	198	-0.00262436005026956	198	-0.00290875884399	198	1.2747562998694E-4	198	2.70202388017893E-4	198	-0.00159804782284922
199	-4.70744608505491E-4	199	-0.00145621053566369	199	0.00169676810241715	199	-7.71624048217845E-4	199	0.0031642647544956	199	5.67394688427925E-4	199	-0.0105217670890188	199	0.00221610803742323	199	-2.15409068688999E-5	199	0.00146520610637513	199	-0.0013247810075061	199	0.00144136540082229	199	-5.51538970504417E-4	199	4.22748355966007E-4	199	-0.00256363266463833	199	-0.00327876623352008	199	0.00123745725766433	199	-1.92527544017551E-4	199	-9.93456300886209E-4
200	-5.37609876280598E-4	200	-5.3649050436011E-4	200	0.00198615638833388	200	-2.47468683649998E-4	200	0.00383144685020032	200	0.00131176938862954	200	-0.00905118088685963	200	0.00219919382073464	200	-3.7297135500669E-4	200	0.00134721525399684	200	-0.0012696386075417	200	0.0027355694883715	200	1.52737663405844E-7	200	-9.72365233062433E-4	200	-0.00320290527900546	200	-0.00241877362304965	200	0.00124743888534073	200	4.47425239489263E-5	200	1.31135221076661E-4
201	-8.14336073511335E-4	201	-2.46770473058433E-4	201	0.00228554467424846	201	-1.33133190827195E-5	201	0.00422862894590725	201	0.00201614408883266	201	-0.00708059468470168	201	7.72279604046133E-4	201	1.25598196855314E-4	201	0.0012492244016169	201	-0.00138449620757797	201	0.00299977357592063	201	-0.00117815555416989	201	-0.00154747882209172	201	-0.0020821778933735	201	-0.00242878101258004	201	1.67420513018435E-4	201	6.20125919139625E-5	201	0.00200572674304134
202	-0.00130064505910799	202	5.32949558244233E-4	202	0.00299144789423877	202	0.00105083584735688	202	0.00347738992121194	202	0.00210654501958896	202	-0.00617303166342431	202	-8.74536619665633E-4	202	5.05464567448932E-4	202	8.85098885368585E-4	202	-0.00135390643125	202	0.00289639737011971	202	-0.00234466408828737	202	-0.00249021530193172	202	-1.18772662078825E-5	202	-0.00283667176881153	202	-3.54631092425173E-4	202	-2.93899509868467E-4	202	0.00125467622215769
203	-0.00142695404470317	203	0.00163266958954633	203	0.00244503450671374	203	0.00128496819030399	203	0.00326043642685825	203	0.00264664027577144	203	-0.00524570119452239	203	-0.00115134530545635	203	-2.01149125401479E-4	203	7.05014719004637E-5	203	-6.53666856741175E-4	203	0.00154243806483123	203	-0.00192103417950396	203	-0.00312649962826228	203	7.5726501654394E-4	203	-0.00168596023466083	203	2.31608995839849E-5	203	-7.60056393939834E-4	203	1.43191697978828E-4
204	-0.00144326303029896	204	8.73079630089535E-4	204	0.00228862111918904	204	0.00202910053325223	204	0.00427348293250507	204	0.00165673553195411	204	-0.00484837072561994	204	-4.88153991247131E-4	204	-3.77628182519629E-5	204	-0.00170409594156773	204	-2.83427282232296E-4	204	8.88478759542011E-4	204	-0.00187740427072036	204	-0.00133278395459246	204	0.0015064072992983	204	-0.00133524870051005	204	-9.79047108406128E-4	204	-9.16213278011391E-4	204	-2.28292826200516E-4
205	-0.00112957201589481	205	-9.61848533114207E-5	205	0.00151220773166472	205	0.00151323287619931	205	0.00329652943815084	205	0.00103683078813699	205	-0.00381104025671863	205	-0.00125496267703706	205	0.00139562348889744	205	-0.00246869335503686	205	3.86812292277661E-4	205	-5.54805457468888E-5	205	-4.03774361936726E-4	205	-4.59068280922459E-4	205	0.00168554958205025	205	-0.00137453716635871	205	-0.00176125511639746	205	-0.00167237016208333	205	-0.00107977735037856
206	-0.00111588100148996	206	-0.00102544933671123	206	0.0015257943441398	206	5.47365219146556E-4	206	0.00296957594379688	206	4.26926044319487E-4	206	-0.00332370978781515	206	-0.00116177136282758	206	8.59009796046806E-4	206	-0.00331329076850562	206	4.27051866786599E-4	206	6.7056014896405E-4	206	3.79855546847274E-4	206	-2.75352607252088E-4	206	0.00130469186480386	206	-5.33825632207829E-4	206	-0.00129346312438816	206	-0.0023285270461546	206	-0.00217126187455818
207	-0.00121218998708628	207	-9.24713820112721E-4	207	9.99380956614004E-4	207	-9.28502437905543E-4	207	0.00257262244944378	207	3.27021300502217E-4	207	-0.00277637931891395	207	-5.88580048617615E-4	207	6.22396103196365E-4	207	-0.00316788818197367	207	5.97291441295056E-4	207	0.00173660084367544	207	3.63485455631363E-4	207	9.88363066418252E-4	207	-1.76165852443511E-4	207	-3.03114098057833E-4	207	-0.00149567113237836	207	-0.00371468393022578	207	-6.72746398736379E-4
208	-0.0018983759755784	208	-0.00127397830351228	208	6.02967569089508E-4	208	-0.00270437009495872	208	0.00156566895508981	208	-3.93865230631896E-4	208	-0.00216027073521374	208	1.34620937782159E-4	208	0.00143578241034614	208	-0.00237477706556621	208	-2.14385498253478E-4	208	0.00290887874492096	208	8.9770021103952E-4	208	4.82078740088099E-4	208	-0.00142702356968982	208	-9.32402563906365E-4	208	-7.48746846445769E-4	208	-0.00363224378926219	208	4.93842690753254E-4
209	-0.00183443896696645	209	-9.0324278691245E-4	209	-8.20548384607989E-5	209	-0.00451033795363465	209	2.92834671171249E-4	209	-1.86269069439859E-4	209	-0.00184605051955256	209	2.3783687211143E-4	209	0.00177351953306193	209	-9.852073120733E-4	209	0.00108733931319716	209	0.00373534141990373	209	6.32818820325731E-4	209	-3.17464621264918E-4	209	-0.00184876258561584	209	-0.00102201218761433	209	-2.43163560811333E-4	209	-0.00338197188233558	209	-2.52545362268819E-4
210	-0.00230050195835574	210	-6.6227361002813E-4	210	4.99432610734374E-4	210	-0.0050663464345897	210	-3.38329662570303E-4	210	-4.48672908247794E-4	210	-0.00138183030389172	210	0.00118105280644087	210	0.00132302049992639	210	1.34362441419178E-4	210	0.00109906412464955	210	0.00400180409488549	210	-4.20625703885236E-5	210	-3.64275158981187E-4	210	-0.00173085888478841	210	-0.00136986011856077	210	2.32419724822464E-4	210	-0.00259169997540809	210	-7.58933415291096E-4
211	-0.0021265649497435	211	2.49290338492081E-4	211	0.00142092005993089	211	-0.0053523549155452	211	-0.0010694939963134	211	-3.51076747055146E-4	211	7.23899117698323E-5	211	0.00140426874077093	211	0.00157252146679188	211	0.00155393219491184	211	0.002050788936101	211	0.00296826676986761	211	3.03056038897687E-4	211	-0.0011010856966962	211	-0.00185295518396256	211	-0.00187770804950826	211	7.48003010456522E-4	211	-0.00120142806848023	211	8.44678531686682E-4
212	-0.00190262794113227	212	-5.91457129868189E-5	212	0.00129240750912629	212	-0.00471836339650178	212	-8.1065833005578E-4	212	-5.03480585861915E-4	212	5.56610127430801E-4	212	0.00136748467510106	212	0.00174202243365684	212	0.00193350194840392	212	0.00195251374755312	212	9.54729444850422E-4	212	6.48174648183009E-4	212	-0.00134789623441112	212	-0.00107505148313614	212	-0.00101555598045433	212	0.00184358629608994	212	-1.61156161553322E-4	212	-3.31709521335988E-4
213	-0.00136869093252034	213	-2.07581764466447E-4	213	0.00164389495832129	213	-0.00351437187745685	213	-3.91822663798003E-4	213	-6.2588442466982E-4	213	0.00112083034309229	213	4.70700609429997E-4	213	0.00204152340052133	213	0.00203307170189682	213	0.0031042385590041	213	-0.00102880788016702	213	2.03293257468928E-4	213	4.45293227873123E-4	213	-4.87147782310515E-4	213	-8.23403911401677E-4	213	0.00166916958172347	213	-5.1088425462531E-4	213	-7.08097574357858E-4
214	-0.0012547539239085	214	-7.46017815945521E-4	214	0.00266538240751757	214	-0.00175038035841268	214	9.70130024589011E-5	214	-7.18288263477085E-4	214	0.00148505055875248	214	-0.00107608345624044	214	0.00201102436738587	214	9.62641455389601E-4	214	0.00337596337045643	214	-0.0031623452051841	214	1.88411866755445E-4	214	0.00126848269015856	214	-2.99244081483074E-4	214	-0.00136125184234892	214	0.00164475286735755	214	2.79387652302177E-4	214	5.15514372619208E-4
215	-0.00195059477637827	215	-2.04453867424625E-4	215	0.00220873126644783	215	-8.76394386342128E-4	215	0.00101672162909416	215	-6.51903113450203E-4	215	3.36878282001685E-4	215	-0.00127286621813205	215	0.00211156189683326	215	1.85681514242475E-4	215	0.00418810590470464	215	-0.00496571893279718	215	-3.25523125151328E-4	215	0.00157322822089245	215	-2.41471123225701E-4	215	-6.53045903661997E-4	215	0.00249845350988753	215	8.36612553483107E-4	215	0.00134616789138686
216	-0.0019463615825428	216	-8.28899189038168E-5	216	6.62317878923346E-4	216	3.37561077374815E-4	216	0.00129123153780686	216	-0.00117571979861708	216	-6.01692743484428E-4	216	-7.99648762727756E-4	216	0.00237780052048109	216	-5.00700042678659E-4	216	0.00355865139275391	216	-0.00333073206084222	216	-6.09300383924705E-4	216	0.00273653212809055	216	-4.44172490912109E-5	216	-2.96543681992389E-4	216	0.00176184037856686	216	0.00139332962037386	216	-7.23671661212677E-4
217	-0.00111212838870678	217	7.09287138673353E-4	217	-9.40955086017325E-5	217	0.0010915165410923	217	9.75741446518796E-4	217	-0.00101953648378483	217	-8.50263768970905E-4	217	-7.46431307324436E-4	217	0.00222403914413061	217	-8.87081599598716E-4	217	0.00444919688080159	217	7.54254811112354E-4	217	-1.53077642696786E-4	217	0.00272983603528854	217	-3.57363374957842E-4	217	-2.2004146032284E-4	217	0.00147522724724691	217	0.00185004668726485	217	-1.13511213812423E-4
218	-0.00114789519487157	218	2.21544166998378E-4	218	-4.40508896126346E-4	218	5.65472004809386E-4	218	5.80251355231098E-4	218	-6.33531689517852E-5	218	-3.48834794457353E-4	218	-3.03213851919892E-4	218	0.00175027776777892	218	-0.00108346315651975	218	0.00424974236885056	218	0.00460924168306676	218	6.73145098530448E-4	218	0.00277313994248729	218	2.69690499176356E-4	218	-3.33539238653202E-4	218	0.0013886141159265	218	0.00190676375415499	218	2.76649233587278E-4
219	-0.00118366200103459	219	9.63801195321246E-4	219	-0.00169692228365115	219	-6.30572531473916E-4	219	2.74761263943546E-4	219	-2.57169854118722E-4	219	9.62594180057508E-4	219	0.00101000360348547	219	4.36516391427944E-4	219	-9.79844713439704E-4	219	0.00417028785689855	219	0.00892422855502151	219	2.39367839757421E-4	219	0.00316644384968612	219	-5.03255626690624E-4	219	2.29629830164058E-5	219	0.00174200098460542	219	0.00128348082104601	219	3.6809680986849E-5
220	-2.59428807199313E-4	220	0.00115605822364628	220	-9.93335671175544E-4	220	-0.0016266170677568	220	3.49271172655818E-4	220	-2.50986539286124E-4	220	0.00276402315457069	220	-1.26778941111461E-4	220	-5.97244984922973E-4	220	6.53773729639262E-4	220	0.00357083334494668	220	0.0135592154269757	220	4.75590580984786E-4	220	0.00271974775688477	220	-8.26201752555988E-4	220	3.89465204685635E-4	220	0.00163538785328576	220	5.40197887936245E-4	220	0.00113697012838632
221	-3.45195613363991E-4	221	7.78315251969808E-4	221	-3.49749058700333E-4	221	-0.00236266160403975	221	4.0378108136796E-4	221	1.35408516372948E-4	221	0.00309465511958251	221	-6.83541799267218E-4	221	-6.61006361274197E-4	221	0.00105177805443457	221	0.00358319051976785	221	0.0147197631513274	221	-1.77976099788424E-4	221	0.00253305166408335	221	-0.00108914787842274	221	6.55967426355097E-4	221	0.00178801026132813	221	-0.00103424268742547	221	0.00135645999228018
222	-9.30254991103219E-4	222	-2.2942771970591E-4	222	6.38375537747038E-5	222	-0.00299853723177179	222	-6.18400006993092E-4	222	0.00106225058044274	222	0.00317360450898008	222	-6.20263097163232E-4	222	-5.08936344889577E-5	222	0.00132570812951904	222	0.00251937236666677	222	0.013220939341851	222	-9.21098227008699E-4	222	0.00197260419093226	222	-0.00168233851659494	222	4.39606898483547E-4	222	6.39018808028524E-4	222	-0.00207446050753912	222	4.34534179883705E-4
223	-0.00110531436884287	223	0.0017430887496932	223	9.07424166250337E-4	223	-0.00203429843758407	223	-5.1833951272684E-4	223	9.19092644513064E-4	223	0.0016325538983768	223	-0.00147698439505994	223	-8.38156515258426E-4	223	0.00116963820460292	223	0.0021855542135647	223	0.0119921155323732	223	-0.00202422035422778	223	0.00197638965367375	223	-6.85694792136538E-4	223	8.24532895116192E-4	223	-3.59972645271434E-4	223	-0.00195467832765406	223	1.62608367486605E-4
224	-7.90373746582418E-4	224	0.00244587831496368	224	9.51010778726058E-4	224	-4.50059643396727E-4	224	-8.08279018460034E-4	224	6.55934708582606E-4	224	3.11503287774073E-4	224	-0.00221370569295676	224	2.84580603973517E-4	224	0.00173356827968796	224	0.00101173606046423	224	0.00891329172289623	224	-0.00134734248144763	224	0.00225017511641479	224	9.20948932321863E-4	224	0.00140945889175015	224	-0.0019189640985724	224	-0.00313489614776863	224	-1.6931744491E-4
225	-5.25433124322738E-4	225	0.00181866788023211	225	7.54597391201095E-4	225	6.24179150791271E-4	225	-0.00148821852419445	225	0.00156277677265226	225	-0.0016495473228284	225	-0.00212042699085302	225	0.00120731772320504	225	9.67498354771834E-4	225	-9.42082092637797E-4	225	0.00499446791341907	225	-6.60464608666977E-4	225	0.00193396057915596	225	0.0021875926567807	225	0.00145438488838412	225	-0.00291795555187235	225	-0.00323511396788323	225	-8.41243257307056E-4
226	-3.04925020628843E-5	226	7.01457445501319E-4	226	8.68184003675943E-4	226	0.00128841794497969	226	-0.00157815802992722	226	0.00225961883672188	226	-0.00137059793343219	226	-0.00163714828874895	226	0.00101005484243633	226	0.00169142842985615	226	-0.00153590024573891	226	3.15644103942248E-4	226	3.06413264112848E-4	226	0.00134774604189758	226	0.00322423638124025	226	0.00152931088501695	226	-0.00283694700517145	226	-0.00266533178799833	226	-3.33169069704375E-4
227	-4.45551879802331E-4	227	0.00144424701077028	227	7.01770616150732E-4	227	9.52656739167779E-4	227	-9.80975356608127E-5	227	0.00146646090079194	227	-0.00204164854403466	227	-0.00161386958664522	227	7.62791961668619E-4	227	0.00240535850494084	227	-0.00131971839884049	227	-0.00331317970553524	227	0.00159329113689388	227	2.715315046391E-4	227	0.00354088010569864	227	0.00196423688165037	227	-0.00154593845847284	227	-0.0026855496081124	227	6.14905117898523E-4
228	-2.80281284969597E-4	228	9.77036576039758E-4	228	3.35822581059908E-4	228	8.96922269266298E-4	228	2.4217177089092E-4	228	0.00102501245654629	228	-0.00183444691439316	228	-6.79706204242514E-4	228	0.00136575816235851	228	0.00251651930065844	228	-0.00131482230759339	228	-0.00707619595241216	228	0.00237042335900828	228	-0.00128428185554519	228	0.00221752467887004	228	0.00301843989954254	228	-5.95911629862833E-4	228	-0.00346264020055465	228	4.72172273057403E-4
229	-2.5402077241754E-4	229	-5.90152133386646E-4	229	0.00117150835681556	229	6.11856197135552E-4	229	7.87661384582528E-4	229	0.00170403023730703	229	-0.00165772194650327	229	2.94698454604614E-4	229	0.00155445139954047	229	0.00263328847473066	229	-9.66405133420167E-5	229	-0.00969308286403425	229	0.00215762494912308	229	-0.00220006578886078	229	6.84190469843138E-4	229	0.00366456844888763	229	-1.52516178913764E-4	229	-0.00205160518545	229	8.99219328458933E-4
230	-1.77602598663285E-5	230	-3.07120486149337E-4	230	0.0014971941325701	230	2.86790125004543E-4	230	7.73150998274907E-4	230	0.00114304801806675	230	1.99003021386979E-4	230	0.00149910311345103	230	6.23144636722195E-4	230	0.00254005764880283	230	0.00172154128090884	230	-0.0119999697756565	230	0.00168482653923796	230	-0.00149584972217731	230	-8.29143739181859E-4	230	0.00304069699823284	230	-1.99120727965685E-4	230	-0.00170057017034519	230	9.86266383859125E-4
231	3.88500252684665E-4	231	0.00163591116108819	231	0.00178287990832615	231	-2.82759471268434E-5	231	5.48640611966356E-4	231	7.62065798826761E-4	231	8.65727989276976E-4	231	0.00210350777229795	231	-3.38162126095831E-4	231	0.00149682682287544	231	0.00146972307515991	231	-0.0127168566872786	231	8.92028129352518E-4	231	-2.51633655492078E-4	231	-0.0015724779482067	231	0.00267682554757798	231	-7.15725277016688E-4	231	-4.29535155239691E-4	231	9.33313439261063E-4
232	8.24760765236299E-4	232	0.00196894280832538	232	0.00231856568408073	232	9.66579807410994E-5	232	-4.15869774342603E-4	232	0.00142108357958737	232	0.00160245295716699	232	0.00267791243114512	232	-3.89468888914557E-4	232	4.73595996946408E-4	232	0.00138790486941165	232	-0.0132437435989008	232	-8.70770280532618E-4	232	0.00128258241119106	232	-7.25812157233108E-4	232	0.00182295409692301	232	-0.00264232982606849	232	4.71499859865609E-4	232	-8.96395053375798E-5
233	0.00100102127778712	233	8.81974455562151E-4	233	0.00200425145983552	233	-8.40809139024401E-6	233	-0.00154038016065083	233	0.00108010136034764	233	0.00255917792505755	233	0.00231231708999236	233	-5.80775651733312E-4	233	5.40365171018742E-4	233	0.00135608666366238	233	-0.0134006305105236	233	-0.00124356869041709	233	0.00228679847787472	233	-8.19146366258572E-4	233	-6.09173537320373E-5	233	-0.00278893437511929	233	0.00155253487497031	233	7.27407550063397E-4
234	0.00168728179033817	234	0.00188500610279974	234	0.00282993723559066	234	2.46525836478106E-4	234	-0.00255489054695879	234	6.99442141462114E-4	234	0.00272541182846098	234	0.00177737346856954	234	-3.5208241455198E-4	234	-5.52592910884719E-4	234	5.42859368200865E-4	234	-0.0124529347642026	234	-0.00126642119279552	234	0.00196101454455988	234	7.57519424715802E-4	234	-0.00192478880438696	234	-0.00240684233834543	234	8.4752441518976E-4	234	0.00107437198797999
235	0.00154452317004328	235	0.00236803775003747	235	0.00354000324084769	235	5.71980476720135E-4	235	-0.00324684337454695	235	-5.02480763620028E-5	235	0.00210017253840444	235	0.00123438500633988	235	0.00112907192281853	235	-0.00173473276071601	235	-2.45951963977475E-5	235	-0.0117214910440513	235	-0.00140943597265153	235	0.00324016202847854	235	0.00188436862212527	235	-0.00121798848000498	235	-0.00271866054409386	235	8.54377530748351E-4	235	6.41088573438253E-4
236	-1.77254583099362E-4	236	5.60942712268364E-4	236	0.00298839989396615	236	0.00163799748632165	236	-0.00273603403871636	236	-1.69938294185989E-4	236	8.04933248347517E-4	236	0.00108139654411055	236	0.00148288424839382	236	-2.76872610547763E-4	236	-4.82049760996084E-4	236	-0.0105800473239004	236	-0.0017824507525086	236	0.00308463544301318	236	0.00223141589848463	236	-0.00121126263858429	236	-0.00251047874984334	236	9.12306463076717E-5	236	5.0780515889759E-4
237	-0.00100903233624283	237	7.37913700534776E-5	237	0.00213679654708532	237	0.00226401449592473	237	-0.00254522470288698	237	-9.96285120100637E-5	237	5.59693958290808E-4	237	5.98408081880386E-4	237	3.66696573968817E-4	237	9.09875396217785E-5	237	-0.00144950432559554	237	-0.00996860360374896	237	-9.95465532366069E-4	237	0.00275910885754715	237	0.00264846317484313	237	-7.84536797163504E-4	237	-0.00153229695559176	237	-5.81916238132862E-4	237	3.94521744357057E-4
238	-0.00105081008938601	238	8.56640027836697E-4	238	0.00273519320020377	238	0.00303003150552694	238	-0.00110441536705697	238	5.40681270166488E-4	238	-4.2554533176542E-4	238	6.65419619649832E-4	238	0.0013205088995436	238	1.38847689790111E-4	238	-0.00154695889019507	238	-0.00918715988359864	238	-0.00141848031222214	238	0.00276358227208195	238	0.00309551045120315	238	-5.78109557425321E-5	238	-9.54115161341029E-4	238	-0.00225506312257373	238	-2.68761670183082E-4
239	-8.22587842527867E-4	239	-1.20511314378291E-4	239	0.00274358985332324	239	0.00254604851512941	239	-4.43606031226729E-4	239	1.70991052342195E-4	239	-4.40784621821066E-4	239	7.02431157420413E-4	239	0.0014243212251186	239	0.0014367078399582	239	-0.0021844134547937	239	-0.00922571616344747	239	-0.00103149509207956	239	0.0031580556866162	239	0.00321255772756146	239	0.00101891488567851	239	2.40666329105466E-5	239	-0.0031982100070147	239	-7.22045084724066E-4
240	1.95634404328793E-4	240	-0.00157766265659376	240	0.00226198650644172	240	0.00305206552473258	240	0.00133720330460285	240	-8.69916548129623E-6	240	-5.66023911877878E-4	240	5.79442695189947E-4	240	-8.18664493067445E-5	240	0.00318456799012701	240	-0.0033618680193932	240	-0.0080342724432958	240	-3.84509871936167E-4	240	0.00199252910115089	240	0.0047596050039207	240	-5.84359272901125E-4	240	9.22248427162486E-4	240	-0.003361356891455	240	-3.05328499264235E-4
241	0.00185385665118609	241	-3.04813998810438E-4	241	0.00282038315956079	241	0.00208808253433457	241	0.00190801264043294	241	-1.69033788137263E-4	241	-6.52517180999013E-4	241	-9.1274364752536E-5	241	1.19458762677382E-5	241	0.00239312738945241	241	-0.00310334855459971	241	-0.00805867008922245	241	5.22107144652395E-4	241	0.00127700251568452	241	0.0051266522802802	241	-8.97633431480749E-4	241	0.00102406663290999	241	-0.00368450377589635	241	3.34221988055994E-4
242	0.00264396159459235	242	-6.23511728132797E-5	242	0.00407513823044692	242	3.95343330625408E-4	242	0.00210365970060256	242	-8.49626172726659E-4	242	-8.79512041745301E-4	242	-2.33082863779543E-4	242	-2.60512314062211E-4	242	0.00314596648844034	242	-0.00276643947804889	242	-0.00708940428158034	242	3.88576879820413E-4	242	0.00234044855660098	242	0.00371427634236099	242	-0.00195977178394724	242	0.00117333940325892	242	-0.00316765066033664	242	7.26906036121022E-4
243	0.00270469410351648	243	-1.30810988046903E-4	243	0.0041029231694818	243	6.42707775806883E-4	243	0.00158970990446594	243	-0.00111021855731597	243	-3.5650690249156E-4	243	-5.04891362806958E-4	243	-0.00122265971405078	243	0.00312880558742723	243	-0.00308953040149795	243	-0.00632013847393775	243	5.85046614987483E-4	243	0.00308464231638172	243	0.00283194846991996	243	-0.00272348215257168	243	7.8261217360609E-4	243	-0.00234079754477712	243	-1.10409915814458E-4
244	0.00148542661243845	244	7.10729196718773E-4	244	0.00379070810851712	244	0.00143007222098834	244	0.00131576010833001	244	-0.00169081094190471	244	-5.23501763238343E-4	244	-0.00130669986183474	244	-0.00190480711403929	244	0.00200164468641528	244	-0.00178262132494655	244	-0.00565087266629494	244	-5.48483649844833E-4	244	0.00390883607616299	244	0.00163962059747824	244	-0.00221719252119534	244	-2.08115056046232E-4	244	-0.00196394442921832	244	-1.877258677494E-4
245	8.06159121362171E-4	245	0.0022022693814856	245	0.00457849304755165	245	7.5743666616912E-4	245	9.31810312194692E-4	245	-0.00198140332649377	245	-3.00496623983904E-4	245	-0.00119850836086322	245	-0.00138695451402704	245	8.34483785403073E-4	245	-3.85712248396786E-4	245	-0.00552160685865211	245	-4.42013914677908E-4	245	0.00401302983594398	245	-2.27072749634516E-5	245	-7.80902889818691E-4	245	-0.00177884228569791	245	-0.00180709131365919	245	-8.5041819684939E-5
246	2.68916302852418E-5	246	0.0018338095662509	246	0.00491627798658634	246	0.00120480111135102	246	2.37860516058674E-4	246	-0.00177199571108311	246	-1.37491484730745E-4	246	-0.00158031685989002	246	-0.00147910191401479	246	9.37322884391634E-4	246	-8.88031718453419E-5	246	-0.00423234105101056	246	-5.54417950926478E-6	246	0.00466722359572547	246	-9.55035147404359E-4	246	-1.14613258443086E-4	246	-0.00262956951535109	246	-0.00153023819810016	246	-3.12357771619531E-4
247	-8.2375860791295E-5	247	0.00215534975101761	247	0.00374406292562046	247	0.00349216555653165	247	5.39107199228894E-5	247	-0.00115192889043492	247	1.55237953404885E-4	247	-0.00149179742554661	247	-6.51249314002733E-4	247	5.24987171090174E-4	247	2.94015007579418E-4	247	-0.00345670764756978	247	5.10828313831091E-4	247	0.00314141735550688	247	-1.37363019845793E-4	247	0.00209167637293373	247	-0.00202721234052827	247	-0.00222181164031987	247	-0.00158096473094904
248	-2.41643351868603E-4	248	0.00209688993578361	248	0.00284895002364127	248	0.0031367026689626	248	-9.18155767754669E-4	248	-8.48829725693889E-4	248	7.26699166400557E-4	248	-0.00191976949769845	248	-6.4228636293695E-4	248	4.32847321258478E-4	248	-2.67984939773314E-4	248	-0.00361778330345874	248	6.76753494768256E-4	248	0.00218876180489147	248	7.20549560218942E-4	248	0.00331068982258831	248	-0.00234466690512836	248	-0.0025981472483263	248	-8.37510324291024E-4
249	-9.96633774557054E-4	249	0.00256931123226867	249	0.00186038297674251	249	0.00361422388767085	249	-0.00124695124600294	249	1.84269439046147E-4	249	6.98160379395851E-4	249	-0.00103774156985015	249	9.86050925941839E-5	249	0.00148070747142715	249	-0.00162998488712596	249	-0.00361885895934844	249	0.00178267867570536	249	2.715785046421E-4	249	0.00117887976832076	249	0.00328706569346515	249	-0.00313212146972663	249	-0.002474482856333	249	-7.04055917634783E-4
250	-0.00204162419724607	250	0.00229183322723703	250	0.00105181592984493	250	0.00415174510637861	250	-0.00238574672425163	250	0.00120736860378656	250	8.99621592392208E-4	250	-1.95713642001216E-4	250	1.99496548124678E-4	250	7.88567621595959E-4	250	-0.00212198483447867	250	-0.00288993461523734	250	0.00116860385664186	250	-4.05604795608028E-4	250	0.0013472099764229	250	0.00354344156434205	250	-0.00292957603432598	250	-0.00256081846434064	250	-0.00117060151097803
251	-0.00231661461993493	251	0.0031143552222046	251	9.13248882945972E-4	251	0.00478926632508614	251	-0.00196454220249986	251	0.00156046776852659	251	0.00211108280538852	251	0.00140631428584737	251	6.03880036562643E-5	251	0.00116642777176512	251	-0.00126398478183098	251	-0.00219101027112689	251	7.24529037579025E-4	251	2.17211904142367E-4	251	0.00284554018452532	251	0.00295981743521789	251	-0.00311703059892565	251	-0.00207715407234677	251	-0.00154714710432113
252	-0.00390160504262305	252	-4.53122782828608E-4	252	-0.00106531816395261	252	0.00427678754379368	252	-0.00348333768074927	252	3.63566933266668E-4	252	0.00125254401838326	252	6.58342213695207E-4	252	0.00151127945918716	252	1.42879219326986E-5	252	-0.0019459847291845	252	-0.00543208592701649	252	-8.89545781483037E-4	252	0.005130028603892	252	0.0040738703926273	252	0.00240619330609526	252	-0.00398448516352445	252	-3.63489680353268E-4	252	-0.00120369269766307
253	-0.00738659546531117	253	-0.00641060078786104	253	-0.01262388521085	253	-0.00225569123749825	253	-0.0143921331589967	253	-0.0134433339019919	253	-0.0123359947686206	253	-0.0115796298584563	253	0.00144217091471788	253	-0.0133278519278983	253	-0.0108379846765372	253	-0.0339831615829045	253	-0.0131936206005463	253	0.0119328453036429	253	0.00514220060072912	253	0.00127256917697238	253	-0.00267193972812318	253	-0.00166982528836002	253	-0.00581023829100591
254	-0.011581585888	254	-0.0133080787928925	254	-0.0335424522577492	254	-0.0175081700187905	254	-0.0415609286372458	254	-0.0442460482930658	254	-0.040925382553012	254	-0.0413076019306073	254	-0.00321693762975084	254	-0.0417892645480764	254	-0.0362707118535424	254	-0.0905755362422322	254	-0.0420480661703317	254	0.020165662003393	254	0.00353053080883114	254	-0.00392105495215134	254	0.00129698233373166	254	-0.00649930180378977	254	-0.0151567838843496
255	-0.0178167326805418	255	-0.020004670923031	255	-0.0638553035611276	255	-0.0397053555583442	255	-0.0825256401624328	255	-0.0881819924373692	255	-0.08386524200262	255	-0.0893155740027591	255	-0.0115641732476321	255	-0.0881924953740043	255	-0.0800216208247981	255	-0.175554188125693	255	-0.0858527177127417	255	0.0235842721937454	255	-0.00193061637553349	255	-0.019289953679519	255	0.00787389141028161	255	-0.0192771899344537	255	-0.0294033294776925
256	-0.0243623485826436	256	-0.0286103771782722	256	-0.102558698735097	256	-0.0662046141355788	256	-0.134959379317844	256	-0.145427936581672	256	-0.137995101452228	256	-0.149613546074911	256	-0.0229909629306118	256	-0.154345726199932	256	-0.135302529796054	256	-0.285132840009153	256	-0.142977369255151	256	0.0204542617866226	256	-0.0120416391295333	256	-0.0441224892159937	256	0.0116608004868324	256	-0.0409250780651185	256	-0.0514398750710345
257	-0.0288979644847451	257	-0.0362260834335144	257	-0.143612093909065	257	-0.0945038727128136	257	-0.193763118473254	257	-0.211013880725975	257	-0.199924960901836	257	-0.217671518147062	257	-0.0381077526135911	257	-0.231628957025861	257	-0.196733438767311	257	-0.407821491892612	257	-0.21035202079756	257	0.00851425137950024	257	-0.0248826618835327	257	-0.0797050247524682	257	0.00639770956338293	257	-0.072102966195783	257	-0.0795464206643777
258	-0.032223580386848	258	-0.0416417896887573	258	-0.176585489083034	258	-0.115783131290049	258	-0.245906857628665	258	-0.268669824870279	258	-0.253394820351443	258	-0.279809490219214	258	-0.0548745422965711	258	-0.301842187851788	258	-0.254604347738566	258	-0.509530143776072	258	-0.27639667233997	258	-0.0106857590276226	258	-0.0391536846375313	258	-0.122407560288942	258	-0.0121753813600654	258	-0.106330854326448	258	-0.107972966257721
259	-0.0318491962889498	259	-0.0466774959439986	259	-0.195158884257003	259	-0.121182389867283	259	-0.275450596784075	259	-0.303255769014582	259	-0.28656467980105	259	-0.318527462291366	259	-0.0709913319795508	259	-0.352065418677716	259	-0.292135256709822	259	-0.569218795659532	259	-0.329051323882379	259	-0.0341257694347448	259	-0.0514747073915309	259	-0.167790095825415	259	-0.0441384722835148	259	-0.142808742457112	259	-0.135269511851064
260	-0.0304148121910517	260	-0.0522832021992414	260	-0.199832279430971	260	-0.111021648444518	260	-0.283684335939485	260	-0.315721713158886	260	-0.294824656797558	260	-0.326695434363517	260	-0.0826081216625303	260	-0.36982710404192	260	-0.302588918933985	260	-0.580869026236424	260	-0.363606041191239	260	-0.056645779841868	260	-0.05937573014553	260	-0.20726263136189	260	-0.0881400177452392	260	-0.173995840878158	260	-0.160114710292704
261	-0.0283604280931549	261	-0.0574600951350135	261	-0.189666738513261	261	-0.0999509070217526	261	-0.275996835601728	261	-0.307107657303188	261	-0.282515613351556	261	-0.308393406435669	261	-0.0891745059383435	261	-0.353499243891751	261	-0.294362191599038	261	-0.548062412591914	261	-0.380871306553839	261	-0.0759543669108238	261	-0.0617365937507861	261	-0.236529657218863	261	-0.136262017692593	261	-0.193966358385709	261	-0.17643868247015
262	-0.0250496400197315	262	-0.0593598715254249	262	-0.167104389320513	262	-0.0925501655989871	262	-0.254675616784464	262	-0.282403601447491	262	-0.251686569905556	262	-0.269661378507821	262	-0.0945196739926573	262	-0.310661383741581	262	-0.269105464264092	262	-0.479635798947405	262	-0.383026571916441	262	-0.0887986839652788	262	-0.0600169799098103	262	-0.250500154037336	262	-0.176654017639946	262	-0.200346875893263	262	-0.182882654647597
263	-0.0177224479707823	263	-0.0582896479158368	263	-0.138272040127765	263	-0.086899424176222	263	-0.2276443979672	263	-0.247739545591794	263	-0.212777526459555	263	-0.219719350579972	263	-0.0962048420469701	263	-0.251443523591414	263	-0.230548736929144	263	-0.389749185302896	263	-0.369971837279042	263	-0.0952430010197345	263	-0.0552973660688334	263	-0.247060650855808	263	-0.200786017587299	263	-0.197817393400815	263	-0.181706626825043
264	-0.00993525592183264	264	-0.0563394243062492	264	-0.111519690935016	264	-0.0871686827534575	264	-0.203693179149936	264	-0.215885489736098	264	-0.177948483013554	264	-0.171787322652123	264	-0.0914700101012835	264	-0.189815663441245	264	-0.188772009594198	264	-0.305742571658388	264	-0.347057102641643	264	-0.0958473180741892	264	-0.0498977522278574	264	-0.228621147674279	264	-0.206758017534651	264	-0.188087910908368	264	-0.173580599002489
265	-1.68063872883373E-4	265	-0.0520792006966611	265	-0.0880673417422679	265	-0.0939479413306916	265	-0.184041960332672	265	-0.189271433880401	265	-0.152069439567554	265	-0.132605294724275	265	-0.084085178155596	265	-0.137487803291076	265	-0.152255282259251	265	-0.237005958013879	265	-0.318162368004245	265	-0.0905716351286454	265	-0.0454981383868818	265	-0.199011644492751	265	-0.195860017482004	265	-0.17266842841592	265	-0.161294571179935
266	0.00992912817606495	266	-0.0453289770870722	266	-0.0703249925495193	266	-0.0956071999079269	266	-0.167390741515408	266	-0.168307378024704	266	-0.134180396121552	266	-0.106093266796426	266	-0.0762903462099098	266	-0.0993499431409077	266	-0.120988554924304	266	-0.183899344369369	266	-0.285977633366846	266	-0.0793159521830997	266	-0.0427785245459056	266	-0.163202141311224	266	-0.174782017429357	266	-0.157808945923473	266	-0.148438543357382
267	0.0182163202250134	267	-0.0371687534774843	267	-0.0571126433567706	267	-0.0890164584851618	267	-0.152579522698144	267	-0.151540754730128	267	-0.122261851844801	267	-0.0896862838278309	267	-0.0667255142642222	267	-0.073812082990738	267	-0.0968518275893571	267	-0.145469526562554	267	-0.249993270682128	267	-0.0651602692375555	267	-0.0425289107049291	267	-0.128012638129696	267	-0.151708926505907	267	-0.14589367521566	267	-0.138209700343912
268	0.0225935122739624	268	-0.0315541186822497	268	-0.0470189881333027	268	-0.08094093058022	268	-0.136614939526834	268	-0.137079705856394	268	-0.113063681944986	268	-0.0790555845786738	268	-0.0563400423521827	268	-0.0582942228405692	268	-0.0807251002544103	268	-0.12071480563401	268	-0.215059186961921	268	-0.0514216690374054	268	-0.0424188633740714	268	-0.0994549119027672	268	-0.132622017429356	268	-0.134641563346324	268	-0.130816245937254
269	0.0237714923963352	269	-0.0263669119366527	269	-0.0395147524517352	269	-0.0732032753498659	269	-0.12195886108706	269	-0.122428656982659	269	-0.10330551204517	269	-0.0720848853295175	269	-0.0489542860106527	269	-0.0490563626904006	269	-0.0709583729194634	269	-0.100590084705465	269	-0.184525103241714	269	-0.0398017722796515	269	-0.0427686233810425	269	-0.0790224198778828	269	-0.118905108352805	269	-0.123259451476989	269	-0.125492791530597
270	0.0231930685431827	270	-0.0224397051910561	270	-0.0338405167701694	270	-0.0654056201195123	270	-0.108622782647284	270	-0.106757608108924	270	-0.093307342145355	270	-0.0690241860803615	270	-0.0443385296691217	270	-0.0423685025402323	270	-0.0629716455845166	270	-0.0840653637769213	270	-0.158231019521506	270	-0.0309918755218996	270	-0.0406483833880147	270	-0.0653199278529994	270	-0.111738199276255	270	-0.113697339607653	270	-0.12086933712394
271	0.0215646446900291	271	-0.01981249844546	271	-0.0285162810886037	271	-0.0582979648891584	271	-0.0960467042075104	271	-0.0896765592351896	271	-0.0832791722455388	271	-0.0683734868312049	271	-0.0410627733275923	271	-0.0363806423900641	271	-0.0574549182495696	271	-0.0708406428483768	271	-0.136266935801299	271	-0.0258419787641468	271	-0.0390181433949861	271	-0.0579774358281151	271	-0.106731290199704	271	-0.103335227738317	271	-0.116915882717282
272	0.0195662208368752	272	-0.0179552916998631	272	-0.0256320454070371	272	-0.0529103096588059	272	-0.0847806257677357	272	-0.0720255103614544	272	-0.0751310023457243	272	-0.0672027875820476	272	-0.0385870169860612	272	-0.0312827822398951	272	-0.0525681909146227	272	-0.0603259219198327	272	-0.118732852081092	272	-0.0246120820063931	272	-0.0357679034019593	272	-0.0547449438032315	272	-0.100544381123153	272	-0.0938731158689823	272	-0.111142428310625
273	0.0176777969837216	273	-0.0166580849542672	273	-0.0252878097254712	273	-0.0482126544284522	273	-0.0749845473279604	273	-0.0569939969526505	273	-0.0677328556597656	273	-0.0648364239935457	273	-0.035401260644532	273	-0.0272621039103003	273	-0.0470464960429355	273	-0.0504015242398568	273	-0.10413879293282	273	-0.0247221852486401	273	-0.0339376634089303	273	-0.0518424517783469	273	-0.0940176733451334	273	-0.0854610039996464	273	-0.103488973903969
274	0.0165793731305692	274	-0.0155260737116061	274	-0.0252834170919405	274	-0.0440980290662454	274	-0.0662578279476778	274	-0.0437299410969532	274	-0.0616453357479294	274	-0.0614971232427024	274	-0.0346054737233636	274	-0.0241753347362295	274	-0.0420306776792447	274	-0.0427158542712114	274	-0.0899553972268015	274	-0.0263419204158444	274	-0.0298473405319815	274	-0.0487421218153683	274	-0.0867964006274322	274	-0.0766788921303112	274	-0.0952255194973111
275	0.0156809492774155	275	-0.0136982523505491	275	-0.024998015481497	275	-0.0411671671421292	275	-0.0583569882355564	275	-0.0345058852412565	275	-0.0573678158360922	275	-0.0571878224918585	275	-0.0336394902188131	275	-0.0231885655621564	275	-0.0375248593155542	275	-0.0357001843025664	275	-0.0783420015207845	275	-0.0279292893863445	275	-0.0282764848298243	275	-0.0444856908217748	275	-0.0791751279097319	275	-0.068366780260976	275	-0.0857820650906547
276	0.0142898957841382	276	-0.0122604309894934	276	-0.0248526138710528	276	-0.0389963052180136	276	-0.0515861485234348	276	-0.0288118293855595	276	-0.0536702959242561	276	-0.0514485217410154	276	-0.0311935067142626	276	-0.0217217963880847	276	-0.0322890409518637	276	-0.0284545143339212	276	-0.0690486058147677	276	-0.0302066583568434	276	-0.0250256291276667	276	-0.0395692598281832	276	-0.0713938551920315	276	-0.0616546683916406	276	-0.0750686106839966
277	0.0121688422908592	277	-0.0113626096284376	277	-0.0247772122606102	277	-0.0382854432938968	277	-0.0458153088113127	277	-0.0264377735298629	277	-0.0513627760124198	277	-0.0464492209901719	277	-0.028307523209711	277	-0.0212250272140118	277	-0.0277732225881726	277	-0.0215788443652754	277	-0.0620852101087497	277	-0.0317440273273428	277	-0.0228247734255103	277	-0.0342828288345896	277	-0.0659325824743311	277	-0.0559825565223049	277	-0.0661351562773396
278	0.0112477887975819	278	-0.00990478826738173	278	-0.0248218106501659	278	-0.0374445813697823	278	-0.0417344690991897	278	-0.0239237176741653	278	-0.0487552561005833	278	-0.0420999202393286	278	-0.0262415397051603	278	-0.0202582580399406	278	-0.0225674042244819	278	-0.0163131743966307	278	-0.0550818144027332	278	-0.0311213962978423	278	-0.0200139177233529	278	-0.0310263978409964	278	-0.0596113097566295	278	-0.049800444652969	278	-0.0590017018706828
279	0.00931673530430377	279	-0.00829696690632531	279	-0.0239064090397232	279	-0.0370837194456657	279	-0.0382136293870685	279	-0.0237496618184689	279	-0.0443677361887467	279	-0.0388906194884848	279	-0.0207455562006098	279	-0.0182714888658682	279	-0.0176115858607915	279	-0.0113975044279853	279	-0.0495384186967156	279	-0.0271987652683414	279	-0.0192830620211959	279	-0.0294899668474047	279	-0.0537900370389295	279	-0.0449383327836337	279	-0.0517782474640258
280	0.00772568181102606	280	-0.00771914554526898	280	-0.0234410074292795	280	-0.0365428575215496	280	-0.033692789674947	280	-0.0232556059627722	280	-0.0397704294917967	280	-0.0350006194884847	280	-0.0148395726960588	280	-0.0148041742037481	280	-0.0149990325362062	280	-0.00673493859089191	280	-0.0457253855462936	280	-0.0223061342388409	280	-0.0171822063190392	280	-0.0275935358538115	280	-0.0482282188331817	280	-0.0403762209142977	280	-0.0451047930573694
281	0.00735462831774747	281	-0.00651905954158138	281	-0.0233353488752179	281	-0.0361861533053744	281	-0.0300792598154107	281	-0.0231315501070757	281	-0.0351233360097325	281	-0.0322599202393281	281	-0.0102538603856246	281	-0.0127163140535789	281	-0.0125497442507276	281	-0.00403547688534989	281	-0.0416927149514654	281	-0.0166827793259055	281	-0.0159510014248401	281	-0.0252758226905678	281	-0.0424058551393847	281	-0.0358341090449628	281	-0.0377613386507116
282	0.00704651343891349	282	-0.00485565167171931	282	-0.0228395018958372	282	-0.0343584980750204	282	-0.0265437571811056	282	-0.0236674942513782	282	-0.0302362425276694	282	-0.0296292209901718	282	-0.00817834695087516	282	-0.00956845390341066	282	-0.0106804559652476	282	-0.00271601517980713	282	-0.0372300443566376	282	-0.0116988935651161	282	-0.0141695404564768	282	-0.0241345026029114	282	-0.035613491445587	282	-0.0315819971756266	282	-0.028957884244055
283	0.00612721440340813	283	-0.00433224380185671	283	-0.0207436549164566	283	-0.0317908428446669	283	-0.0227082545467994	283	-0.0237734383956818	283	-0.0258191490456055	283	-0.0261885217410152	283	-0.00830283351612682	283	-0.0063305937532423	283	-0.0107011676797679	283	-0.00134655347426538	283	-0.0342273737618104	283	-0.00847500780432764	283	-0.0132680794881139	283	-0.021953182515257	283	-0.0307211277517903	283	-0.0293198853062915	283	-0.0236344298373981
284	0.00709791536790316	284	-0.00445883593199348	284	-0.0196478079370754	284	-0.0291331876143124	284	-0.0200027519124939	284	-0.0230893825399852	284	-0.0233020555635424	284	-0.0229778224918586	284	-0.00942732008137881	284	-0.00431273360307305	284	-0.0102518793942883	284	1.42908231276273E-4	284	-0.0305247031669831	284	-0.0061211220435391	284	-0.0117766185197512	284	-0.0182918624276018	284	-0.0262087640579924	284	-0.0271877734369559	284	-0.0207709754307395
285	0.00687861633239883	285	-0.00432542806213121	285	-0.0187119609576953	285	-0.0270355323839588	285	-0.0198972492781886	285	-0.0223753266842879	285	-0.0210849620814786	285	-0.0212471232427021	285	-0.0118218066466298	285	-0.00265487345290438	285	-0.00877259110880857	285	0.00100236993681957	285	-0.0255720325721542	285	-0.00393723628275033	285	-0.0111251575513878	285	-0.0158005423399468	285	-0.0222264003641959	285	-0.02562566156762	285	-0.0199275210240835
286	0.00600931729689425	286	-0.00435202019226821	286	-0.0174361139783148	286	-0.0251078771536051	286	-0.0188117466438822	286	-0.0198812708285914	286	-0.0190478685994151	286	-0.0202064239935451	286	-0.014656293211881	286	-0.00199701330273605	286	-0.00752330282332903	286	0.00212183164236102	286	-0.0224793619773278	286	-0.00255335052196148	286	-0.0104636965830247	286	-0.0138392222522921	286	-0.0193840366703988	286	-0.0257835496982848	286	-0.0216940666174263
287	0.00537001826138894	287	-0.00503317181259533	287	-0.0164702722910688	287	-0.0220002219232516	287	-0.0188361562293453	287	-0.0167297574197871	287	-0.0171709707435044	287	-0.0193257247443892	287	-0.0155608022252594	287	-0.00242915315256731	287	-0.00646713346187511	287	0.00347801816155435	287	-0.0199474263689678	287	3.05309155743672E-5	287	-0.010442224175752	287	-0.0113081744873398	287	-0.0175710171924433	287	-0.0251785452155211	287	-0.0244106122107688
288	0.00396071922588526	288	-0.00441015494860508	288	-0.0173747005026916	288	-0.0196025666928978	288	-0.0185960890230206	288	-0.0143687085460513	288	-0.0156840801330072	288	-0.0188450254952333	288	-0.0148464560931361	288	-0.00239129300239771	288	-0.00511811665316042	288	0.00320408337754863	288	-0.0177155179823281	288	0.00171419186719035	288	-0.00905016838410599	288	-0.00903101518026972	288	-0.0153953808335929	288	-0.0229738039692968	288	-0.0236871578041127
289	0.00239194693701883	289	-0.00382713808461332	289	-0.0191691287143145	289	-0.0183349114625448	289	-0.0182960218166945	289	-0.011007659672317	289	-0.0133071895225099	289	-0.0183843262460766	289	-0.0132521099610114	289	-0.00260343285223019	289	-0.00476909984444784	289	0.0025601485935427	289	-0.0166936095956896	289	0.00233785281880827	289	-0.0073881125924613	289	-0.00687385587319866	289	-0.0143997444747423	289	-0.0217790627230734	289	-0.0214637033974547
290	0.00186370139479219	290	-0.00286412122062174	290	-0.0201735569259371	290	-0.0159672562321909	290	-0.0180259546103683	290	-0.00863661079858247	290	-0.0109202989120121	290	-0.0182536269969198	290	-0.0108477638288882	290	-0.00294557270206131	290	-0.00411008303573457	290	0.0018262138095384	290	-0.0166417012090507	290	0.00202151377042625	290	-0.00611605680081517	290	-0.00563669656612742	290	-0.0129341081158927	290	-0.02072432147685	290	-0.017940248990798
291	0.00145545585256546	291	-0.00247110435662989	291	-0.0206379851375607	291	-0.0136396010018371	291	-0.0194058874040435	291	-0.0084855619248474	291	-0.0103034083015157	291	-0.0170129277477633	291	-0.00863341769676396	291	-0.00236771255189261	291	-0.00350106622702206	291	0.00203227902553316	291	-0.0154997928224123	291	0.00164517472204295	291	-0.00466400100916964	291	-0.00477953725905689	291	-0.0116784717570422	291	-0.0185495802306264	291	-0.0143967945841412
292	0.00126721031033838	292	-0.00182808749263774	292	-0.0199824133491839	292	-0.0133319457714833	292	-0.0190558201977176	292	-0.00725451305111324	292	-0.00865651769101827	292	-0.0159022284986081	292	-0.00669907156464067	292	-0.00119985240172404	292	-0.00373204941830796	292	0.0019783442415271	292	-0.014497884435773	292	4.98835673660381E-4	292	-0.00299194521752444	292	-0.00374237795198518	292	-0.0104428353981918	292	-0.0166648389844024	292	-0.0116633401774839
293	0.00179896476811159	293	-0.00185507062864776	293	-0.0180868415608071	293	-0.0129842905411302	293	-0.0196557529913912	293	-0.00616788975653648	293	-0.00781961821481758	293	-0.0155515292494508	293	-0.00631472543251643	293	-0.00216320900826439	293	-0.00339969605241475	293	0.0033739734657221	293	-0.013646318608501	293	5.72496625276919E-4	293	-0.00180988942587934	293	-0.00314521864491368	293	-0.00912719903934178	293	-0.0150300977381788	293	-0.0100852743776398
294	0.00218071922588514	294	-0.00169205376465609	294	-0.0163117293497885	294	-0.0123951524652464	294	-0.0198236244519014	294	-0.0061338339008401	294	-0.00789270691768085	294	-0.0146108300002945	294	-0.00643123985521488	294	-0.00184818795708352	294	-0.00237289394361362	294	0.00364902136751422	294	-0.0134052095270496	294	9.35370953987658E-4	294	-0.00145756392022189	294	-0.00266415656333407	294	-0.00836156268049137	294	-0.0132753564919552	294	-0.00936439338687922
295	0.00159247368365811	295	-0.00185903690066436	295	-0.0146671533123559	295	-0.0125076177362429	295	-0.0198190910237193	295	-0.00571977804514301	295	-0.00921579562054298	295	-0.0129801307511386	295	-0.00553875825853911	295	-8.83166905902399E-4	295	-0.00162609183481344	295	0.00371406926930806	295	-0.0122241004456001	295	0.00111732755597416	295	-0.00116492374821675	295	-0.00238020791149474	295	-0.00838592632164126	295	-0.0118706152457317	295	-0.00836351239611854
296	0.00183843802147354	296	-0.00302602003667207	296	-0.0143425772749231	296	-0.0121500830072403	296	-0.0182645575955371	296	-0.00607572218944696	296	-0.0089588843234063	296	-0.0116294315019818	296	-0.0055962766618638	296	-3.68145854721114E-4	296	-0.00188928972601232	296	0.00247911717110139	296	-0.0111429913641494	296	0.00108928415795972	296	-0.00158228357621137	296	-8.46259259654758E-4	296	-0.00871028996279044	296	-0.0112258739995079	296	-0.00832263140535794
297	0.00187913898596825	297	-0.00430300317268095	297	-0.0153480012374896	297	-0.0118925482782375	297	-0.0184300241673556	297	-0.00622166633374999	297	-0.00835197302626867	297	-0.0106687322528245	297	-0.00575379506518736	297	-2.63124803540293E-4	297	-0.00129248761721179	297	9.94165072895292E-4	297	-0.00912188228269795	297	3.81240759945278E-4	297	-0.00131964340420687	297	-2.22310607815857E-4	297	-0.0088446536039406	297	-0.0108811327532843	297	-0.00743175041459754
298	0.00182983995046282	298	-0.00447998630868973	298	-0.0162434252000567	298	-0.0105050135492348	298	-0.0181754907391731	298	-0.00664761047805307	298	-0.00712506172913141	298	-0.00836803300366817	298	-0.00543131346851222	298	9.81896247640002E-4	298	-4.95685508411725E-4	298	-8.20787025310743E-4	298	-0.00713077320124711	298	-1.06802638069503E-4	298	-0.00180700323220151	298	-8.83619559752802E-5	298	-0.00846901724508964	298	-0.0113763915070599	298	-0.00630086942383645
299	0.00244054091495816	299	-0.00424696944469805	299	-0.0161188491626234	299	-0.00902747882023203	299	-0.0178109573109912	299	-0.00620355462235622	299	-0.00641815043199401	299	-0.00760733375451217	299	-0.00460883187183647	299	9.46917298822569E-4	299	4.91116600389141E-4	299	-0.0025957391235174	299	-0.00500966411979675	299	-0.00117484603608276	299	-0.00178436306019591	299	-2.4441330413616E-4	299	-0.00740338088623993	299	-0.0121416502608369	299	-0.00514998843307701
300	0.00241124187945374	300	-0.00408500980424975	300	-0.0166942731251902	300	-0.00816994409122973	300	-0.0161864238828091	300	-0.00674111214341089	300	-0.00480102105910163	300	-0.00788889225418732	300	-0.00570635027515998	300	1.56973259813675E-4	300	8.16735866991714E-4	300	-0.0029500288804627	300	-0.00506930182601373	300	-0.00180288943409757	300	-0.00162172288819118	300	-3.30464652296136E-4	300	-0.00617774452738917	300	-0.0121303281011205	300	-0.00518788117812274
301	0.00194194284394822	301	-0.0034770369301933	301	-0.0164012483687488	301	-0.0071836466013897	301	-0.0153879425705972	301	-0.0065900632696767	301	-0.00496386551711669	301	-0.00798952168372224	301	-0.00620618412288287	301	-2.51665900181663E-5	301	0.00192341319253142	301	-0.00341423915645578	301	-0.00445902914674967	301	-3.33810578925231E-4	301	-0.00134856396504279	301	-0.00204759763323104	301	-0.00468210816853976	301	-0.0112182162317849	301	-0.0044444267714665
302	0.00247264380844392	302	-0.00177906405613726	302	-0.0158283886422002	302	-0.00577599137103579	302	-0.0144290412707209	302	-0.00675901439594195	302	-0.00544670997513386	302	-0.00719015111325838	302	-0.0065962642944779	302	3.9269356015037E-4	302	0.0024600905180705	302	-0.00357844943244956	302	-0.00440875646748662	302	1.7496213297008E-4	302	-0.00179534985560093	302	-0.0033759095112682	302	-0.00347647180969002	302	-0.0111461043624486	302	-0.0043809723648085
303	0.00181509923071221	303	-8.01091182080604E-4	303	-0.0138355289156511	303	-0.00593833614068284	303	-0.0134201399708465	303	-0.00650796552220712	303	-0.00469955443315051	303	-0.0075907805427935	303	-0.00607634446607364	303	4.30553710319082E-4	303	0.00256676784360899	303	-0.00297265970844318	303	-0.00411848378822288	303	6.13734844864489E-4	303	-0.00263213574615939	303	-0.00426422138930604	303	-0.00348083545083888	303	-0.012953992493113	303	-0.00457751795815131
304	-2.82445347020044E-4	304	-6.33118308024372E-4	304	-0.0109226691891022	304	-0.00582068091032983	304	-0.0121512386709712	304	-0.00629691664847254	304	-0.00398239889116603	304	-0.00782140997232883	304	-0.0058164246376684	304	0.00103841386048753	304	0.00249344516914807	304	-0.00204686998443648	304	-0.00479821110895973	304	6.92507556759203E-4	304	-0.00293892163671927	304	-0.00350253326734418	304	-0.00473519909198927	304	-0.0121218806237779	304	-0.00374406355149493
305	2.40010075248875E-4	305	-3.75145433967994E-4	305	-0.00873980946255415	305	-0.00538302567997562	305	-0.0122223373710959	305	-0.0055558677747376	305	-0.00292524334918198	305	-0.00666203940186527	305	-0.00499650480926306	305	1.86274010657073E-4	305	0.00235012249468713	305	-0.00370108026042981	305	-0.00476793842969681	305	4.81280268654238E-4	305	-0.00242570752727822	305	-0.00216084514538295	305	-0.00466956273313901	305	-0.0110297687544421	305	-0.00363060914483793
306	5.22465497517999E-4	306	-2.97279682630602E-5	306	-0.00762694973600553	306	-0.00514537044962182	306	-0.0111934360712205	306	-0.00504481890100283	306	-0.00130792073467934	306	-0.00602576573186742	306	-0.00427658498085837	306	-7.18798030989731E-5	306	0.00329103613036175	306	-0.00528428609436027	306	-0.00430797771442837	306	-7.49947019451191E-4	306	-0.00233249341783726	306	-6.99157023420049E-4	306	-0.00496593935959222	306	-0.00956606850034092	306	-0.00296164524385834
307	-0.00151507908021387	307	-9.72796826292921E-6	307	-0.00559493229989005	307	-0.00423771521926941	307	-0.0106230568600463	307	-0.00489377002726865	307	5.97026103568155E-5	307	-0.0054950664827107	307	-0.00369779326821718	307	-2.1685875191757E-4	307	0.00369957512427987	307	-0.00608568393258047	307	-0.00415857853435231	307	-0.00178278743574012	307	-0.00117908425260271	307	1.27537022128088E-4	307	-0.00465593935959241	307	-0.00782550915366276	307	-0.0029007642530976
308	-0.00110262365794611	308	-2.49727968262725E-4	308	-0.00528450585681739	308	-0.00387005998891521	308	-0.0100798860386426	308	-0.00413272115353358	308	-0.00107267404460654	308	-0.00493436723355423	308	-0.00277113244090543	308	-2.01837700736895E-4	308	0.0036181141181979	308	-0.0072670817707996	308	-0.00297917935427439	308	-0.00206867487192852	308	-2.75306648648055E-4	308	0.00139368670112017	308	-0.00317593935959248	308	-0.00550494980698524	308	-0.00206988326233759
309	-2.41966247914505E-4	309	-7.97279682629437E-5	309	-0.00673407941374471	309	-0.00376240475856182	309	-0.00937671521723793	309	-0.00431167227979934	309	-7.75050699570734E-4	309	-0.00499366798439738	309	-0.00361447161359418	309	-2.96816649556497E-4	309	0.00398665311211577	309	-0.00796847960901914	309	-9.09780174198183E-4	309	-0.00150456230811802	309	-8.15290446940509E-5	309	1.79836380111098E-4	309	-4.05939359592544E-4	309	-0.00621439046030758	309	-0.00256900227157697
310	-0.00116670287459453	310	4.70272031736663E-4	310	-0.00672365297067135	310	-0.00276474952820749	310	-0.00943354439583377	310	-0.00392062340606447	310	-0.00115742735453406	310	-0.00572296873524181	310	-0.00410781078628286	310	8.48204401624919E-4	310	0.00398519210603343	310	-0.00651987744723836	310	0.00120961900587968	310	-0.00127044974430657	310	-6.27751440739566E-4	310	-6.64013940896879E-4	310	1.4406064040795E-4	310	-0.00654383111363011	310	-0.00127812128081661
311	-0.0016414395012756	311	0.00176027203173668	311	-0.00660322652759859	311	-0.00284709429785401	311	-0.0105103735744292	311	-0.00411957453232858	311	-0.00129980400949758	311	-0.00558226948608453	311	-0.00399114995897154	311	0.00113322545280603	311	0.00242373109995153	311	-0.0047712752854574	311	0.00125901818595597	311	-0.00178633718049603	311	8.60261632142922E-5	311	-0.00100786426190513	311	3.24060640408241E-4	311	-0.0090532717669527	311	-0.00182724029005588
312	-2.16176127955769E-4	312	0.00173027203173692	312	-0.00716280008452497	312	-0.00427943906750006	312	-0.0106572027530252	312	-0.00324852565859413	312	-0.0022821806644604	312	-0.00533157023692787	312	-0.00377448913165956	312	8.48246503986516E-4	312	0.00161227009386966	312	-0.00297267312367655	312	0.0012084173660325	312	-8.922246166847E-4	312	-5.00196232831485E-4	312	-8.51714582913665E-4	312	-4.15939359592166E-4	312	-0.0091227124202744	312	-0.00143635929929609
313	-2.09127546364485E-5	313	0.00204373018635806	313	-0.00685237364145141	313	-0.00467178383714639	313	-0.0106340319316196	313	-0.00316679247824769	313	-0.00128398941553254	313	-0.00535374811669698	313	-0.00470782830434846	313	0.00127307169169733	313	0.00189126213235635	313	-0.00104900793072105	313	9.77068556385241E-4	313	-9.78112052874458E-4	313	-7.16418628877058E-4	313	-6.65564903922444E-4	313	-0.00279612762017134	313	-0.00833086079896983	313	-7.65478308534462E-4
314	-2.15649381317462E-4	314	0.002936643187196	314	-0.00479435035895293	314	-0.00361781080764434	314	-0.0108675723020237	314	-0.00316273662255107	314	-0.0010756747092362	314	-0.00388437754623183	314	-0.00436428681531797	314	0.00120307169169731	314	0.00118252657183504	314	-2.64242078813481E-4	314	3.55571402774757E-5	314	-0.00136876623536519	314	-8.22049650155421E-5	314	-3.43014611235759E-4	314	-0.00438940028522516	314	-0.00748611955274558	314	-5.34597317774832E-4
315	5.59613992002106E-4	315	0.0025995561880352	315	-0.00463697182685152	315	-0.00317336227105347	315	-0.00899023030925417	315	-0.00411868076685451	315	-3.87360002941151E-4	315	-0.00293500697576832	315	-0.00327158222192292	315	0.00112307169169767	315	0.00142379101131418	315	-1.6947622690644E-4	315	-0.00144595427583116	315	-0.0018406993010105	315	0.0010421256905282	315	-2.24112934389176E-4	315	-0.00495267295027713	315	-0.00820137830652268	315	-0.00143371632701506
316	0.00102847338979561	316	0.00125246918887356	316	-0.00384959329474999	316	-0.00202891373446246	316	-0.00760288831648381	316	-0.00376462491115781	316	4.09547033548563E-5	316	-0.00280563640530307	316	-0.00221887762852813	316	4.33071691697151E-4	316	0.00190505545079311	316	1.65289625001286E-4	316	-0.00174746569194006	316	-0.00140263236665561	316	0.00177645634607249	316	6.0478874245895E-4	316	-0.00460594561533156	316	-0.00709663706029851	316	-9.02835336254348E-4
317	7.30928812064491E-4	317	0.0011153821897123	317	-0.0038222147626481	317	-0.00102446519787058	317	-0.00630554632371272	317	-0.00360056905546102	317	2.29269409650179E-4	317	-0.00435626583483817	317	-0.00158617303513342	317	1.83071691696846E-4	317	0.00345631989027417	317	0.00112005547690774	317	-0.00251897710804894	317	-7.4456543230017E-4	317	0.00366078700161587	317	0.0013236904193068	317	-0.00404921828038418	317	-0.00683189581407451	317	-0.00162195434549428
318	8.63384234333076E-4	318	0.00110829519055056	318	-0.0031148362305462	318	-3.30016661279409E-4	318	-0.00532820433094283	318	-0.00325651319976394	318	1.57584115945575E-4	318	-0.00466689526437403	318	-3.23468441739472E-4	318	-3.26928308302499E-4	318	0.00399758432975261	318	0.00303482132881516	318	-0.00324048852415793	318	-0.00120649849794585	318	0.00588511765715971	318	0.00163259209615507	318	-0.00216249094543741	318	-0.00560715456785132	318	-0.00195107335473299
319	1.65839656601996E-4	319	0.00137218558397656	319	-0.00468745769844592	319	-0.00157556812468851	319	-0.00557086233817294	319	-0.00233224179662894	319	-9.38392175395819E-5	319	-0.00547000221428373	319	7.49236151655452E-4	319	-0.00110773947944232	319	0.00381226275629487	319	0.00647251565144824	319	-0.00302227065811334	319	-0.00166843156359064	319	0.0063194483127047	319	0.00273149377300186	319	-0.00171643895157558	319	-0.00341241332162667	319	-0.0019301923639734
320	-2.61704921130423E-4	320	0.00142305557558853	320	-0.00484086915645232	320	-0.00263186101086266	320	-0.00611258046358731	320	-0.00139743152489835	320	-0.00122460765047983	320	-0.00616930296512663	320	7.30866868110525E-4	320	-5.00578578430222E-4	320	0.00275547615049376	320	0.00872753115089608	320	-0.0025847295866841	320	-0.00156202106628722	320	0.0055239041856332	320	0.00251557850370876	320	-1.4207531042576E-4	320	-0.00295767207540276	320	-0.00166931137321225
321	-1.99249498861853E-4	321	0.00179392556720082	321	-0.0049869139148262	321	-0.00415729197291981	321	-0.00530116564961425	321	-0.00205262125316708	321	-0.00142537608342064	321	-0.00603860371597076	321	1.88917994766058E-4	321	6.9658232258174E-4	321	0.00175868954469216	321	0.00994254665034422	321	-0.00239718851525517	321	-0.00227113202581819	321	0.00419877744984287	321	0.0015136067472783	321	6.32288330724151E-4	321	-0.00243293082917884	321	-0.0020984303824525
322	1.93205923406659E-4	322	0.00181479555881392	322	-0.00422295867319811	322	-0.00414272293497842	322	-0.00457975083564222	322	-0.00238781098143637	322	-3.66144516360301E-4	322	-0.00408790446681362	322	4.76969121421256E-4	322	4.63743223594548E-4	322	5.71902938891533E-4	322	0.0102475621497922	322	-0.00226964744382574	322	-0.00367024298534879	322	0.0023036507140537	322	8.11634990846244E-4	322	0.00127665197187365	322	-0.00347818958295587	322	-0.00174754939169119
323	-8.00916847707001E-4	323	0.00155566555042608	323	-0.00393900343157139	323	-0.00393815389703622	323	-0.00511833602166956	323	-0.00216300070970554	323	3.03087050699702E-4	323	-0.0030772052176582	323	4.65020248076264E-4	323	4.20904124607269E-4	323	2.35116333090701E-4	323	0.00928257764923934	323	-0.00211210637239745	323	-0.00326935394487915	323	9.78523978265144E-4	323	0.00167966323441426	323	0.00136101561302304	323	-0.00388344833673226	323	-0.00186666840093164
324	1.96100983385961E-4	324	6.96535542038745E-4	324	-0.00207504818994408	324	-0.00211358485909408	324	-0.00458692120769744	324	-0.00135819043797447	324	-1.17681382240775E-4	324	-0.00222650596850116	324	2.30713747324529E-5	324	0.00116806502561939	324	3.48329727288821E-4	324	0.00802759314868773	324	-0.0017345653009686	324	-0.00375846490441045	324	3.73397242475093E-4	324	3.57691477984368E-4	324	0.00194537925417304	324	-0.0050387070905078	324	-0.00153578741017135
325	-1.16881185521223E-4	325	0.00172740553365092	325	-7.61092948316389E-4	325	-0.00166901582115209	325	-0.00505550639372565	325	-9.13380166242206E-4	325	-1.68449815180161E-4	325	-0.00126580671934562	325	-2.88877498612727E-4	325	-2.04774073369052E-4	325	7.9154312148777E-4	325	0.00732260864813572	325	-0.00182702422953884	325	-0.00271757586394195	325	0.00120827050668559	325	8.85719721551936E-4	325	0.0017697428953225	325	-0.00381396584428462	325	-0.00233490641941003
326	-9.86335442831887E-6	326	0.00178827552526428	326	-2.67137706689624E-4	326	-9.74446783209793E-4	326	-0.00673409157975247	326	0.00126446990648077	326	2.01651969669037E-4	326	-0.00101860397920728	326	-0.00100082637195786	326	-0.00127932651705542	326	0.00106207979605877	326	0.00802736371629553	326	-0.00181014659966117	326	-0.00154668682347303	326	0.00225314377089614	326	0.00131374796512151	326	0.00193328830440009	326	-0.00302922459806076	326	-0.00213402542865015
327	4.671544766639E-4	327	0.00165914551687596	327	-4.45609427012883E-4	327	-0.00132987774526772	327	-0.00755000164104302	327	0.00207666657953531	327	1.82043827115841E-4	327	-0.00216923340874242	327	-0.00203636080496228	327	-6.31116742307647E-4	327	8.45057564088592E-4	327	0.0086753653073588	327	-4.13490116966564E-4	327	-4.31117995927544E-4	327	0.00326837522358758	327	0.00214082563493534	327	0.00232656096945405	327	-0.0016844833518368	327	-0.00112314443788986
328	0.00193417230775683	328	0.0014600155084894	328	-0.00250525995742557	328	-0.00151530870732586	328	-0.00611461235603272	328	0.00164886325258973	328	-6.17564315437136E-4	328	-0.00329986283827832	328	-0.00251363679551631	328	-4.7290696756086E-4	328	4.803533211728E-5	328	0.00827336689842273	328	-0.00106683363427251	328	4.18667281980589E-5	328	0.00432378065354211	328	4.69727311783075E-4	328	0.00181983363450655	328	-0.0027797421056146	328	-9.52263447129731E-4
329	0.00157119013884888	329	0.00212088550010137	329	-0.0047149104878379	329	-0.00227073966938374	329	-0.00584922307102165	329	2.21059925643807E-4	329	-6.67172457990972E-4	329	-0.00429049226781331	329	-0.00194091278606834	329	7.53028071853734E-5	329	9.01013100146564E-4	329	0.00718136848948703	329	-0.00211017715157791	329	5.94851452322409E-4	329	0.00513918608349506	329	0.00140862898863059	329	0.00177310629956029	329	-0.00280500085939028	329	-0.00129138245636895
330	0.00252540001889034	330	0.00104175549171437	330	-0.0064245610182514	330	-0.00158617063144195	330	-0.00466383378601076	330	-5.46743401301342E-4	330	7.13219399455234E-4	330	-0.00497112169734848	330	-0.00216818877662206	330	0.00127351258193276	330	0.00188399086817626	330	0.0063093700805501	330	-0.00200352066888332	330	-2.1216382355238E-4	330	0.00501459151344985	330	0.00138753066547803	330	9.06378964613985E-4	330	-0.00354025961316662	330	-3.70501465608797E-4
331	0.00124960989893275	331	0.00152262548332693	331	-0.00687421154866374	331	-0.00132160159350025	331	-0.00251844450099981	331	-0.00159454672824655	331	8.13611256901048E-4	331	-0.00493175112688515	331	-0.00156546476717523	331	0.00260172235667966	331	0.001976968636205	331	0.00504737167161373	331	-0.00127686418618911	331	-9.09179099426893E-4	331	0.0041299969434041	331	5.3643234232581E-4	331	-1.80348370333761E-4	331	-0.00306551836694346	331	-2.19620474848803E-4
332	6.23819778973633E-4	332	9.03137553088129E-4	332	-0.00690386207907601	332	-0.00118703255555808	332	-6.83055215989548E-4	332	-0.00233596139602632	332	7.14305287801587E-4	332	-0.00449238055642009	332	-8.82740757728762E-4	332	0.00305562445126828	332	0.00148142197443146	332	0.00485825477087065	332	-0.00197025713825294	332	-0.0015461943753019	332	0.00275540237335825	332	-2.7466598082615E-4	332	-0.00102828349646256	332	-0.00310024467062231	332	-0.00118873948408815
333	-8.71970340984518E-4	333	2.49833546378753E-4	333	-0.00607393130016298	333	-0.00109276654769452	333	-0.00103721868626216	333	-0.00152395098019653	333	0.00153610728803422	333	-0.00342300998595491	333	-0.00145066171866493	333	0.00384706505194288	333	1.71285736711546E-4	333	0.00529970340017094	333	-0.00140383135110156	333	-0.0031241646523652	333	0.00160086800209847	333	8.94320182418085E-4	333	-0.00138064719025977	333	-0.00216968532394368	333	-0.00110785849332817
334	-0.00148776046094312	334	-0.00117347046033167	334	-0.00472721048307534	334	-0.00117082377043598	334	-0.00157795328037569	334	-4.71940564366946E-4	334	0.00245790928826661	334	-0.00250363941549114	334	-0.00169352745253448	334	0.00454850565261733	334	-0.00146885050100831	334	0.00521115202947087	334	-9.67405563949697E-4	334	-0.00457945660520043	334	0.00169679515487253	334	3.73954074700755E-4	334	-0.00167301088405658	334	-0.00195912597726533	334	-0.00132697750256661
335	-0.00209355058090122	335	-8.96774467041617E-4	335	-0.00355048966598925	335	-0.00197888099317645	335	-0.0019986878744902	335	8.10069851461925E-4	335	0.00183971128850047	335	-0.00226426884502651	335	-0.00192639318640353	335	0.00641994625329279	335	-0.00164898673872749	335	0.00517260065877068	335	-5.10979776797704E-4	335	-0.00546474855803503	335	0.00273272230764743	335	-6.66412033016428E-4	335	-0.0019653745778534	335	-8.08566630587926E-4	335	-8.66096511806802E-4
336	-6.38200098653563E-4	336	-7.60078473750703E-4	336	-0.00249376884890218	336	-0.00342693821591755	336	-0.00216942246860441	336	0.00168208026729211	336	0.00130151328873307	336	-0.00272489827456113	336	-0.00205925892027281	336	0.00657138685396763	336	-0.00101912297644713	336	0.00484404928806992	336	-8.14553989646249E-4	336	-0.00669004051087096	336	0.00334864946042135	336	1.63221859265761E-4	336	-0.00161773827165046	336	-0.00190800728391061	336	-6.55215521046415E-4
337	-1.49427809787994E-4	337	1.76617519539235E-4	337	-2.77048031816385E-4	337	-0.0041049954386585	337	-0.00370015706271865	337	0.00301409068312175	337	6.83315288966035E-4	337	-0.00160552770409783	337	-0.0028621246541416	337	0.00668282745464222	337	-4.29259214167033E-4	337	0.00335549791737044	337	-8.12820249418422E-6	337	-0.00710533246370648	337	0.00451457661319576	337	3.5285575154731E-4	337	-0.00106010196544748	337	-0.00350744793723212	337	-7.84334530286479E-4
338	0.00146934447907832	338	1.08588846721602E-4	338	0.00172967278527025	338	-0.00486305266139997	338	-0.00478089165683304	338	0.00251610109895228	338	-2.04882710801435E-4	338	-0.00176615713363315	338	-0.00250499038801166	338	0.00665426805531677	338	0.00132060454811356	338	0.00266694654667088	338	3.78297584657794E-4	338	-0.00657062441654066	338	0.00406050376596934	338	-5.07510356169583E-4	338	-8.72465659244703E-4	338	-0.00361688859055409	338	-0.00218345353952554
339	0.002518116767944	339	4.71110841689715E-4	339	0.00303639360235675	339	-0.00440110988414055	339	-0.00405162625094668	339	0.00164669104022508	339	-0.00101198600307395	339	-0.00174678656316818	339	-0.00191785612188067	339	0.00585955705229946	339	0.00182299016136422	339	0.00166670371921551	339	5.45474734553686E-4	339	-0.0050459163693759	339	0.00231643091874378	339	-0.00113787646388719	339	-0.00134482935304181	339	-0.00281634717492985	339	-0.00219110450955196
340	0.00195688905680935	340	6.9363283665691E-4	340	0.00427117587139758	340	-0.00388623781612019	340	-0.00402025401139561	340	0.00113081865144515	340	-7.18570749691949E-4	340	-8.17415992703019E-4	340	-0.00161346088676151	340	0.00391140581595284	340	-4.34296643998522E-5	340	4.40396517507935E-4	340	3.93007793117128E-4	340	-0.00378567212257863	340	8.02643208383635E-4	340	-8.57503010250227E-4	340	-9.3719304683848E-4	340	-0.00278423530559468	340	-0.00219279693468888
341	7.85661345675592E-4	341	8.46154831624091E-4	341	0.00405442067129691	341	-0.00282904251749461	341	-0.0040972108347983	341	8.54946262665912E-4	341	-0.00104515549631046	341	1.61954577761136E-4	341	-0.0018312379865808	341	0.00303325457960746	341	-0.00195984949016292	341	-2.15910684199905E-4	341	3.00540851680964E-4	341	-0.00310896813124373	341	5.29081641055029E-4	341	-0.00117378438726146	341	-0.00104955674063589	341	-0.0015721234362589	341	-0.00226448935982493
342	3.24433634541599E-4	342	7.48676826591854E-4	342	0.00298766547119733	342	-0.00171184721886952	342	-0.00320416765820131	342	3.39073873887763E-4	342	-8.71740242927466E-4	342	-1.18674851774081E-4	342	-0.0010090150863995	342	0.00290510334326122	342	-0.00243626931592722	342	-7.92217885906332E-4	342	2.80739102453964E-5	342	-0.00274226413990952	342	5.55200737260009E-5	342	-0.00111006576427197	342	-0.00157192043443288	342	5.29988433076944E-4	342	-0.00261618178496104
343	1.36801947881793E-4	343	0.00196119882155976	343	0.00234091027109695	343	-8.74651920244496E-4	343	-0.00198112448160437	343	0.00147320148510843	343	-0.00105832498954506	343	5.40695718690642E-4	343	-4.56792186219523E-4	343	0.00197695210691506	343	-0.00362268914169039	343	-0.00165852508761333	343	5.95606968808227E-4	343	-0.00248556014857471	343	5.91958506396928E-4	343	-0.00122634714128278	343	-7.24284128230224E-4	343	0.00197210030241113	343	-0.00196787421009681
344	-3.77233714304204E-4	344	0.0031237208165269	344	9.44155070996544E-4	344	-0.00215745662161915	344	-9.1808130500759E-4	344	0.00165732909632954	344	-7.94909736163696E-4	344	-3.99337108456521E-5	344	-0.0010345692860394	344	0.00214880087056901	344	-0.00343910896745481	344	-5.14832289320921E-4	344	0.00118314002737208	344	-0.00283885615723989	344	0.0020183969390688	344	-0.00150262851829464	344	5.33521779724211E-5	344	0.00217421217174696	344	-0.00195956663523411
345	5.48730623510352E-4	345	0.00311961010715134	345	2.77399870896922E-4	345	-0.00258026132299438	345	8.14961871590469E-4	345	0.00197475335255692	345	-0.0016212358861436	345	-5.23220497764321E-4	345	-6.62346385859713E-4	345	0.00203449384835785	345	-0.00179539352056679	345	4.00341701517704E-4	345	2.51030916365913E-4	345	-0.0029621521659049	345	0.00141483537174025	345	-0.00229890989530546	345	-2.91823134519476E-5	345	0.00159527109492341	345	-0.00348125906036945
346	4.24694961325578E-4	346	0.00275504510295743	346	-4.39355329202584E-4	346	-0.00247306602436925	346	0.00225800504818707	346	0.00209195747882607	346	-6.06010456301931E-4	346	-9.62451428986988E-4	346	2.39876514321224E-4	346	0.0025632521109511	346	-7.30866437764099E-4	346	9.44402847634862E-4	346	-6.89312120636387E-5	346	-0.00147544817457135	346	3.8127380441022E-4	346	-0.00239519127231613	346	1.72584093496297E-5	346	7.30012341147557E-4	346	-0.00324295148550569
347	9.20659299139537E-4	347	0.00280048009876399	347	-0.00116947042238991	347	-0.00304849698642684	347	0.00227472764533232	347	0.00142916160509543	347	-5.07850264597209E-5	347	-9.9168236020919E-4	347	1.08756605969873E-4	347	0.00245201037354459	347	-4.46339354962078E-4	347	2.48463993752779E-4	347	-1.48893340492506E-4	347	-0.0011055990717912	347	-1.11786925944379E-4	347	-0.00138505005447165	347	4.53699132151542E-4	347	2.54753587372036E-4	347	-0.00167464391064165
348	7.6623636954487E-5	348	0.00141591509457051	348	-0.00108958551557681	348	-0.00281392794848578	348	0.00209145024247714	348	2.86365731364313E-4	348	6.4444040338163E-4	348	-0.0010309132914319	348	3.76366976189146E-5	348	0.00319076863613876	348	2.68187727839653E-4	348	4.62525139870884E-4	348	-5.48855468920806E-4	348	-5.65749969012153E-4	348	-8.34847656299154E-4	348	-3.84908836628561E-4	348	-2.29860145045002E-4	348	-6.20505166404328E-4	348	-0.00105633633577895
349	3.82587974769422E-4	349	7.13500903763986E-5	349	-0.00133970060876365	349	-0.00238935891054304	349	9.98172839622669E-4	349	1.63569857633661E-4	349	0.00189966583322398	349	-0.00117014422265438	349	3.65167892670826E-5	349	0.0027995268987322	349	-7.17285189359096E-4	349	1.76586285988378E-4	349	-0.0019888175973497	349	-7.75900866233137E-4	349	-0.00236790838665346	349	0.00134523238121531	349	-9.53419422243584E-4	349	-7.05763920180402E-4	349	-4.9802876091487E-4
350	-3.10263530746369E-4	350	-7.23214913817216E-4	350	-0.0023298157019509	350	-0.00249478987260154	350	6.48954367674648E-5	350	-9.29226016096685E-4	350	0.00283489126306513	350	-0.00192937515387648	350	7.53968809155126E-5	350	0.0031882851613263	350	-0.00202275810655728	350	5.06474321051442E-5	350	-0.00139877972577906	350	-4.66051763453379E-4	350	-0.00172096911700859	350	0.00298537359905993	350	-0.00108697869944052	350	-3.21022673956506E-4	350	3.10278813949516E-4
351	-0.00129605365070518	351	1.88012999646325E-4	351	-0.00235993079513719	351	-0.00282022083465883	351	-0.00150838196608749	351	-0.00103202188982721	351	0.00212011669290746	351	-0.00193860608509944	351	-3.8572302743578E-4	351	0.00266704342392021	351	-0.00161823102375624	351	1.04708578223089E-4	351	-7.58741854207656E-4	351	-3.36202660673912E-4	351	-0.00126402984736274	351	0.00341551481690328	351	-8.80537976638784E-4	351	1.63718572267157E-4	351	-8.21413611186372E-4
352	-0.00244184377066325	352	-0.00285150801461143	352	-0.00280004588832483	352	-0.00334565179671742	352	-0.0028716593689424	352	-0.00151272073545172	352	0.00245656748559053	352	-0.00228310174711677	352	7.63157064212372E-4	352	0.00297519475242414	352	-0.00263422462245977	352	0.00203388153384676	352	-2.36337411079646E-4	352	-4.56353557894751E-4	352	-0.00170709057771834	352	0.0029256560347477	352	-7.6255552040827E-4	352	7.29348396655283E-5	352	-8.53106036323936E-4
353	-0.00242763389062173	353	-0.00673102902887024	353	-0.0034515969762543	353	-0.00300802472849515	353	-0.00326335283682155	353	-0.0019826509158305	353	0.00205381116011338	353	-0.00274100399964716	353	0.00156134254010087	353	0.0032194239471055	353	-0.00272055513272562	353	0.00298636213091363	353	3.87598343056794E-4	353	-0.00102885529992403	353	-0.00140993440301163	353	0.00272313532033142	353	-2.81810766075807E-4	353	-4.7495329099867E-4	353	-0.00102479846145975
354	-0.00307342401058008	354	-0.0109105500431292	354	-0.00243495866625132	354	-0.00248654188296538	354	-0.00226304916929632	354	-0.00208258109620996	354	-6.89451653643758E-5	354	-0.00192890625217679	354	0.0015986521961171	354	0.00289365314178625	354	-0.00183688564299178	354	0.00288884272798118	354	0.00200153409719128	354	-2.14321150625807E-4	354	-9.82504739316603E-4	354	0.00262291043045781	354	8.48933988256917E-4	354	-6.72841421663684E-4	354	-0.0014064908865965
355	-0.00305921413053856	355	-0.0166000710573879	355	-0.0015783203562485	355	-0.0017750590374348	355	-0.00172274550177143	355	-7.25112765884717E-5	355	3.7829850915827E-4	355	-0.00125680850470733	355	0.00181596185213273	355	0.00296788233646783	355	-6.32161532578834E-5	355	0.00224132332504912	355	0.00233546985132804	355	-1.97870013280976E-5	355	-0.00158507507562078	355	0.0024026855405852	355	0.00119967874258897	355	-0.00112072955232811	355	-0.00111818331173286
356	-0.00199500425049681	356	-0.0249195920716465	356	-0.0015916820462456	356	-0.00114357619190475	356	-0.00113244183424666	356	3.57558543032432E-4	356	4.35542183680582E-4	356	-0.00149471075723806	356	0.00203327150814925	356	0.00321211153114831	356	-2.39546663523882E-4	356	0.00201380392211714	356	0.00224940560546294	356	-2.05252852031101E-4	356	-0.00142764541192442	356	0.00151246065071131	356	0.00102042349692155	356	-0.00166861768299231	356	-8.19875736868703E-4
357	-0.00120623196163105	357	-0.0319341048148996	357	-5.15043736242227E-4	357	-3.62093346374159E-4	357	3.67861833278305E-4	357	0.00160762836265338	357	1.02785858203447E-4	357	-0.00172261300976917	357	9.30581164164224E-4	357	0.00168634072583007	357	1.04122826209974E-4	357	6.86284519185065E-4	357	0.00115334135959877	357	7.69281297266389E-4	357	-0.00122021574822995	357	0.00920223576083767	357	7.71168251253229E-4	357	-9.86505813656891E-4	357	-0.00177156816200519
358	-8.87459672764379E-4	358	-0.0367799308165777	358	2.61594573759183E-4	358	-0.00167061050084349	358	0.00134816550080252	358	0.00252119469129397	358	1.10183339489645E-4	358	-0.00191752746829899	358	6.27890820180887E-4	358	1.11323807230335E-4	358	-4.02334733766274E-4	358	-9.90794283713292E-4	358	7.37648981559147E-4	358	6.43815446564666E-4	358	-0.00148278608453367	358	0.0279220108709648	358	0.00100181819197864	358	-3.74920417400837E-4	358	-0.00188415868827718
359	-7.88687383899145E-4	359	-0.0413557568182554	359	-2.11767116237382E-4	359	-0.00171912765531346	359	0.00105846916832775	359	0.00284021563718007	359	4.79580308714311E-4	359	-0.0010636006048248	359	2.35200476196518E-4	359	-3.13892584022035E-4	359	-7.60443939981315E-4	359	-0.00124214528616839	359	8.86790885243016E-4	359	4.48349595862041E-4	359	-9.85356420837746E-4	359	0.0520017859810897	359	6.21235555812838E-4	359	-1.00179171177217E-4	359	-0.00230842452930968
360	-6.49915095033649E-4	360	-0.0458115828199324	360	-6.37824916799978E-4	360	-0.00246715359704908	360	8.91852478616784E-4	360	0.00113923658306536	360	-6.10227220620985E-5	360	-2.89673741349361E-4	360	-2.77667255556224E-4	360	-0.00127910897527439	360	-0.0021185531461958	360	-0.0018634962886237	360	0.00148593278892672	360	-6.03773786185258E-5	360	-2.27502184991124E-4	360	0.0768844626051912	360	7.06529196463634E-5	360	4.6456207504697E-4	360	-0.00274269037034269
361	-9.11428061671771E-5	361	-0.05043740882161	361	-1.24234383958033E-4	361	-0.00203555025016833	361	7.85637481441448E-4	361	-6.51742471047712E-4	361	0.00107837424716273	361	0.00190425312212561	361	-3.0055812484342E-4	361	-0.00195432536652795	361	-0.0023866623524107	361	-0.00242484729107861	361	7.85074692610799E-4	361	-3.99529717070024E-4	361	-0.00142959257016795	361	0.100127082905027	361	-2.59929716519558E-4	361	2.09303321270227E-4	361	-0.00149695621137624
362	9.07629482698624E-4	362	-0.0522032348232875	362	-5.00643851116145E-4	362	-0.00129394690328688	362	1.29422484265618E-4	362	-0.00176272152516166	362	0.00182777121638544	362	0.0039281799856008	362	7.65510058693408E-5	362	-1.99541757780253E-4	362	-0.00178477155862566	362	-0.00158619829353412	362	3.74216596293664E-4	362	-2.08682055522047E-4	362	-0.00227168295534419	362	0.109689703204864	362	-3.00512352684912E-4	362	-7.35955432506152E-4	362	-6.01222052409867E-4
363	8.15261169357484E-4	363	-0.052539060824965	363	-9.57053318274781E-4	363	-0.00142234355640625	363	-6.16792512910358E-4	363	-0.00129370057927503	363	0.00150716818560959	363	0.00502210684907656	363	-4.56339863418975E-4	363	0.00162524185096657	363	-0.00174288076484075	363	-0.00224754929598792	363	3.43358499977242E-4	363	0.00122216560602606	363	-0.00309377334052208	363	0.103012323504701	363	-7.41094988850222E-4	363	-7.51214186282212E-4	363	4.4512106557093E-5
364	0.00135947104939937	364	-0.0515967439213938	364	-3.43462785433069E-4	364	-0.0016007402095255	364	-6.23007510085927E-4	364	-0.00103467963338932	364	0.00190656515483401	364	0.00516603371255098	364	8.07692672939453E-5	364	0.00268002545971413	364	-7.80989971055135E-4	364	-0.00411890029844386	364	4.25004036612719E-5	364	0.00214301326757393	364	-0.00340586372569796	364	0.0875649438045372	364	-0.00141167762501571	364	-8.46472940058796E-4	364	-1.09753734474971E-4
365	0.00120368092944112	365	-0.0497885156711835	365	1.70127747408877E-4	365	-1.19136862644531E-4	365	-5.39222507262238E-4	365	-5.77786583297879E-4	365	0.0027571588087616	365	0.00575180876427428	365	-2.02121601994065E-4	365	0.00356727873213014	365	-6.8015059784976E-4	365	-0.00323812098384124	365	4.84812907337151E-4	365	0.00251386092912309	365	-0.00383795411087551	365	0.0690575641043738	365	-0.00121300070672969	365	-9.27783145739269E-4	365	-9.04019575508563E-4
366	2.87890809482327E-4	366	-0.0443402874209742	366	-1.76303045676285E-4	366	2.31850166487746E-4	366	-8.34333259957631E-4	366	8.83262290436448E-4	366	0.00254878958943205	366	0.00472918557914781	366	-0.00137470300782372	366	0.00359667237972605	366	4.97775441870019E-5	366	-0.0029154953944559	366	0.00182987326433981	366	0.00252400818524201	366	-0.00259989100298519	366	0.0509748674784278	366	-0.00134496550791674	366	5.43287235963419E-5	366	-0.00219828541654099
367	-0.00157789931047603	367	-0.0380520591707638	367	-7.16307156844564E-4	367	1.93333012017405E-4	367	-6.97170568132677E-4	367	0.00101431116417139	367	0.00132042037010294	367	0.00433656239402147	367	-0.00260664728300686	367	0.00236606602732259	367	2.99705686224172E-4	367	-0.00329286980507071	367	0.00198493362134222	367	0.0017427134301844	367	-0.00148151187995804	367	0.0365094595346962	367	-0.00176693030910524	367	7.06440592932012E-4	367	-0.00317255125757399
368	-0.00120368943043392	368	-0.0337138309205542	368	-0.00103631126801318	368	0.00151481585754798	368	-0.00141000787630752	368	-7.64639962094193E-4	368	0.00137205115077332	368	0.00420393920889417	368	-0.00199859155819127	368	0.00147545967491869	368	5.4963382826223E-4	368	-0.00191024421568553	368	0.00142999397834576	368	0.00129141867512583	368	-4.83132756930793E-4	368	0.0264740515909638	368	-0.00228889511029262	368	7.68552462268701E-4	368	-0.00400681709860695
369	-0.00130947955039229	369	-0.0304856026703453	369	-0.00201631537918345	369	0.00187629870307937	369	-0.00262284518448297	369	-4.03591088359079E-4	369	0.00186368193144393	369	0.00365131602376767	369	-0.00128053583337451	369	9.74853322515123E-4	369	-3.70438029701603E-4	369	-7.67618626300148E-4	369	0.00187505433534785	369	0.00147012392006829	369	-0.00104475363390311	369	0.0189686436472307	369	-0.00277085991148152	369	0.00155066433160389	369	-0.00256108293964097
370	-0.00169526967035072	370	-0.0257267611221312	370	-0.00281631949035166	370	0.00115778154860902	370	-0.00364568249265762	370	1.87457785375322E-4	370	1.85312712114971E-4	370	0.00207869283864071	370	-5.92480108557503E-4	370	-0.00112575302988915	370	-8.2050988766369E-4	370	-0.00134499303691449	370	9.5011469235029E-4	370	0.00239882916500989	370	-0.00183637451087559	370	0.0127032357034995	370	-0.00277282471266815	370	0.00190277620093937	370	-0.00144534878067315
371	-0.00107105979030919	371	-0.0228367611221314	371	-0.00238632360152025	371	2.49264394139637E-4	371	-0.00295851980083395	371	8.08506659110364E-4	371	-0.00131305650721458	371	0.00140606965351431	371	2.95575616259924E-4	371	-0.00196635938229317	371	-0.00188058174562666	371	-0.00162236744752953	371	1.51750493531111E-5	371	0.00342753440995214	371	-0.00272799538784785	371	0.00845782775976733	371	-0.00293478951385584	371	0.00237488807027475	371	-6.09614621706278E-4
372	-4.06849910267404E-4	372	-0.0202167611221311	372	-0.00132632771268959	372	8.00747239670052E-4	372	-0.00161135710900862	372	0.00157459044265629	372	-0.00147920145615377	372	4.65896178187819E-5	372	0.00195363134107662	372	-0.00189925827495596	372	-0.00243221597731491	372	-0.00195728952796514	372	-3.03659630047193E-4	372	0.00363623965489435	372	-0.00314961626482013	372	0.00459241981603498	372	-0.00277801998742966	372	0.00290437056272275	372	-3.88046273958054E-6
373	-8.32640030226095E-4	373	-0.0187867611221311	373	-5.4142368760246E-4	373	0.00144223008520061	373	3.68342433016089E-4	373	0.00256067422620099	373	-9.85346405093068E-4	373	-5.82890417877735E-4	373	0.00240354074104587	373	-0.00152215716761894	373	-0.0019738502090032	373	-0.00275221160840111	373	-7.32494309446885E-4	373	0.00344421978507636	373	-0.0042308840146541	373	0.00228954727855868	373	-0.00170125046100367	373	0.00339385305516959	373	-5.98146303771863E-4
374	-7.38430150184044E-4	374	-0.0160367611221313	374	-4.56047221638833E-4	374	0.00184371293073049	374	0.00178880303010232	374	0.00197675800974562	374	-0.00150149135403232	374	-0.00153237045357368	374	0.00263400624356347	374	-0.00353505606028204	374	-0.00168548444069128	374	-0.00259713368883663	374	-0.00265132898884612	374	0.00243198238082964	374	-0.00419204582634602	374	9.61435362961005E-4	374	-6.04480934577545E-4	374	0.00288333554761699	374	-0.00135241214480519
375	-1.42202701427507E-5	375	-0.0148067611221308	375	1.09329244325274E-4	375	0.00107519577626203	375	0.00308926362718687	375	0.00103284179329144	375	-7.37636302972078E-4	375	-0.0014818504892693	375	0.00336447174607901	375	-0.00539795495294371	375	-0.0016171186723799	375	-0.00145205576927232	375	-0.00267016366824624	375	8.49744976584077E-4	375	-0.00395320763803753	375	7.73323447361918E-4	375	3.62288591849058E-4	375	0.00291281804006438	375	-0.00162667798583804
376	-0.00118001039010096	376	-0.0135767611221311	376	-3.95294289710968E-4	376	8.066786217924E-4	376	0.00252972422427167	376	6.18925576836737E-4	376	-7.0378125191084E-4	376	-0.00152133052496506	376	0.00348493724859544	376	-0.0070408538456066	376	-0.00167875290406805	376	-1.76977849708493E-4	376	-0.00237899834764566	376	3.47507572337591E-4	376	-0.00331436944972907	376	-3.54788468236222E-4	376	0.00174905811827575	376	0.00166230053251226	376	-0.00207094382687067
377	-0.00186580051006047	377	-0.012464745353558	377	-2.59917823746569E-4	377	4.38161467322118E-4	377	0.00119018482135758	377	5.75009360382239E-4	377	2.60073799150717E-4	377	-0.00101081056066032	377	0.00197540275111141	377	-0.00890375273826916	377	-0.0016203871357563	377	8.5810006985465E-4	377	-4.17833027046122E-4	377	6.55270168091526E-4	377	-0.00252553126142097	377	-5.72900383835062E-4	377	0.00198582764470245	377	0.00124178302495892	377	-0.00108520966790504
378	-0.00138159063001897	378	-0.00957316116506224	378	-6.64541357783044E-4	378	-1.00355687147058E-4	378	3.8064541844296E-4	378	3.20703584817394E-4	378	9.44952144952715E-4	378	-0.0015011817950823	378	7.55868253627945E-4	378	-0.010900322547041	378	-0.00137221186494152	378	0.00143384479895836	378	4.36234832153382E-4	378	6.0303276384488E-4	378	-0.00125669307311327	378	-0.00147101229943392	378	0.00128217326666125	378	-6.68944655508597E-5	378	2.14686833682087E-4
379	-0.00170738074997701	379	-0.0093815769765655	379	5.11620855766282E-4	379	-1.37601939501408E-4	379	0.00130178890583821	379	1.86717548741555E-4	379	0.00199101121545731	379	-0.00172258133572711	379	-2.52953271655976E-4	379	-0.0100111280282453	379	-0.00153425639893001	379	0.00223035892368273	379	0.00190365177435226	379	0.00144357777481829	379	-3.27760023475676E-4	379	-0.0018281376429421	379	3.68029768083034E-4	379	-5.77295013322043E-4	379	-4.62152423247986E-4
380	-0.00185317086993564	380	-0.00917999278807002	380	0.00134162085576595	380	0.0013244342614831	380	0.00112547771166582	380	7.3273151266573E-4	380	0.00200707028596092	380	-8.93980876371714E-4	380	-8.69117355104976E-4	380	-0.0067019335094507	380	-2.7630093291986E-4	380	0.00126687304840711	380	0.00246106871655094	380	0.00221267542433612	380	9.61526600206319E-4	380	-0.00226249485411856	380	-0.00112611373049543	380	-0.00117769556109248	380	-4.88991680176909E-4
381	-1.0896098989388E-4	381	-0.00844840859957419	381	0.00204162085576609	381	0.00276647046246925	381	0.00154916651749293	381	0.00118874547658976	381	0.0028531293564642	381	-9.053804170156E-4	381	-1.7528143855472E-4	381	-0.00335273899065491	381	1.81654533091269E-4	381	6.03387173131686E-4	381	0.00236848565875025	381	0.00143177307385312	381	8.70813223888156E-4	381	-0.00271685206529426	381	-0.00255025722907387	381	-0.00114809610886368	381	-5.05830937107099E-4
382	8.15248890147835E-4	382	-0.00847682441107711	382	0.0013216208557667	382	0.00363850666345389	382	0.0028028553233197	382	0.00216475944051453	382	0.00129918842696863	382	-0.0014767799576596	382	0.00158855447799677	382	-7.83544471859798E-4	382	0.00150960999910232	382	-6.40098702143987E-4	382	8.75902600948386E-4	382	0.00101087072337158	382	0.0011500998475702	382	-0.00199120927647023	382	-0.00538440072765312	382	-0.00120849665663325	382	-0.00230267019403652
383	-5.30541229810666E-4	383	-0.00804915868006884	383	0.00216162085576599	383	0.00418054286443859	383	0.00268654412914682	383	0.00261077340443894	383	-0.00107475250252698	383	-0.00126817949830471	383	0.00250239039454758	383	-1.84349953063823E-4	383	0.00130756546511357	383	-2.33584577419954E-4	383	1.93319543146941E-4	383	-9.10031627111785E-4	383	0.00157938647125189	383	-0.00127556648764671	383	-0.00882854422623147	383	-1.68897204403606E-4	383	-0.00177950945096672
384	-0.00101633134976886	384	-0.00640282192608588	384	0.00201162085576634	384	0.00458257906542325	384	0.00124023293497455	384	0.00332678736836289	384	-0.00265869343202318	384	-0.001409579038949	384	0.00277622631109864	384	1.14844565731076E-4	384	0.00135552093112334	384	-5.57070452695818E-4	384	-4.49263514655129E-4	384	-0.00313093397759356	384	0.00183867309493291	384	-7.49923698822208E-4	384	-0.00898268772481003	384	-6.99297752174921E-4	384	-8.26348707896329E-4
385	-2.62121469727816E-4	385	-0.00415648517210077	385	8.41620855766223E-4	385	0.00452461526640846	385	5.93921740802195E-4	385	0.00832915965606773	385	-0.00326061901165797	385	-0.00227607898260018	385	0.00182006222765008	385	-1.94366345485086E-4	385	0.00127472916940441	385	-2.9013866571681E-4	385	-0.00131585858627314	385	-0.00348183632807597	385	0.00152795971861508	385	-3.74280909999136E-4	385	-0.0061771965749049	385	-1.94716621631841E-4	385	-4.16707561237573E-4
386	-7.87911589685386E-4	386	-0.00322014841811757	386	0.00127282854504962	386	0.00375864113946545	386	-1.80348653750606E-4	386	0.0104327902763615	386	-0.00337238956438135	386	-0.00241297126494633	386	9.06243074669355E-4	386	-0.00112422382824118	386	0.00165403377478057	386	-3.33174750873688E-4	386	-0.0017719930435689	386	-0.00339098441152341	386	0.00208751686295727	386	7.19349063352581E-4	386	-0.00313173352896445	386	-4.66753619878801E-5	386	-2.86567921994774E-4
387	-5.43701709643685E-4	387	-0.00282381166413348	387	0.00223820501101457	387	0.00242195566244341	387	-9.33538624975583E-4	387	0.00880642089665518	387	-0.00181416011710311	387	-0.00358986354729041	387	-1.36334644535552E-4	387	-0.00191408131099724	387	1.13338380158368E-4	387	-5.6210836030246E-5	387	-0.00111812750086671	387	-0.00354920376536594	387	0.00229721722411913	387	3.76031075569827E-4	387	0.00229372951697737	387	-4.18634102344662E-4	387	2.33571717247472E-4
388	0.0013905081703971	388	-0.00217747491014908	388	8.23581476978141E-4	388	0.00154527018542172	388	-0.00135672859619973	388	0.006450051516949	388	5.84069330174408E-4	388	-0.00356675582963639	388	-4.38912363739163E-4	388	-0.00106393879375233	388	8.26429855358413E-5	388	-0.00140924692118727	388	-4.54261958163116E-4	388	-0.0012774231192072	388	0.0012469175852825	388	-5.72869122130726E-5	388	0.00830919256291907	388	-0.00142059284270069	388	-8.26288643511752E-4
389	0.00230471805043919	389	-0.00192725393547111	389	-2.8104205705759E-4	389	7.5858470839929E-4	389	-7.39918567424169E-4	389	0.00193368213724288	389	7.52298777451088E-4	389	-0.00301364811198113	389	-5.61490082943372E-4	389	1.6620372349152E-4	389	-4.78052409087049E-4	389	-0.00139228300634375	389	-2.80396415459627E-4	389	0.00124435752695096	389	3.06617946445265E-4	389	-0.00383060489999654	389	0.0115446556088603	389	-0.00190255158305686	389	-4.66149004268779E-4
390	9.35989316037222E-4	390	-0.00299566974697463	390	-2.25665591093716E-4	390	-1.98100768622922E-4	390	5.96891461351667E-4	390	-0.00128268724246361	390	0.00120052822472871	390	-0.00210054039432617	390	6.55932197852316E-4	390	5.06346240735311E-4	390	-8.48747803710026E-4	390	-5.55319091500195E-4	390	7.53469127243278E-4	390	0.0010161381731093	390	3.76318307607093E-4	390	-0.00748392288777922	390	0.011460118654802	390	-0.00222451032341286	390	-1.76009365026708E-4
391	6.28444738305589E-4	391	-0.00301408555847882	391	-0.00108028912513003	391	-9.04786245645717E-4	391	0.00126370149012711	391	-0.00338514780731725	391	0.00216960654103193	391	-0.00166997464017538	391	0.00124335447864876	391	0.0011331670387893	391	-3.18342022978868E-4	391	-9.08549953586579E-4	391	0.00222991828040797	391	4.17918819267449E-4	391	2.36018668769766E-4	391	-0.0103972408755624	391	0.0101357112200553	391	-0.00252599253466723	391	-5.02686832125399E-4
392	-5.90998394258691E-5	392	-0.00197250136998317	392	-0.00169491265916566	392	-0.00129110953767952	392	0.00130079936905503	392	-0.00384065838555525	392	0.00271999674583157	392	2.66626249274537E-5	392	7.91094963675576E-4	392	0.00112485427082287	392	4.13765574207581E-4	392	-7.4208183456026E-4	392	0.00243036028610089	392	3.78743830964368E-4	392	-9.44252220639541E-4	392	-0.0116916363702844	392	0.00737150395151964	392	-0.00220673829185625	392	-7.11718009023699E-4
393	-0.00106664441715765	393	-0.00257091718148672	393	-4.69536193200781E-4	393	-0.00142402829083288	393	0.00240060303942169	393	-0.00298616896379311	393	0.0027303869506321	393	4.03299890027853E-4	393	3.71826568481559E-4	393	9.16541502856028E-4	393	4.85873171393258E-4	393	-5.56137155358627E-5	393	0.00159080229179498	393	-3.5941412128615E-4	393	-0.00169425286542779	393	-0.0130901604302522	393	0.00446729668298396	393	-9.87484049044696E-4	393	-1.6074918592146E-4
394	-7.84188994889412E-4	394	-0.00294933299299149	394	-4.15972723732949E-6	394	-8.56947043985201E-4	394	0.00308040670978826	394	6.83204579701169E-5	394	0.00337077715543099	394	9.19937155129169E-4	394	-2.27441826713637E-4	394	1.08228734889693E-4	394	0.00126798076858048	394	-9.99145596511042E-4	394	0.00168124429748939	394	-0.00132757207353507	394	-0.00202425351021596	394	-0.00991868449021904	394	0.00162308941444778	394	-1.58229806233479E-4	394	2.20219637180996E-4
395	5.6826642738006E-4	395	-0.00229774880449529	395	8.91216738726719E-4	395	1.60134202863205E-4	395	0.00260021038015434	395	0.00371280987973233	395	0.00375116736023084	395	5.76574420231069E-4	395	-8.76710221908716E-4	395	1.39915966921755E-4	395	0.00264008836576668	395	-0.0011326774774858	395	0.00161168630318365	395	-0.00129573002578454	395	-0.00260425415500443	395	-0.00596720855018695	395	-0.00155111785408835	395	1.10244365778556E-5	395	4.91188460282288E-4
396	0.00106072184964834	396	-0.00116526203441136	396	0.00203659320469107	396	0.00180721544971085	396	0.00224001405052032	396	0.00252729930149442	396	0.00323155756503013	396	8.43211685332079E-4	396	-0.00124597861710285	396	-0.00138839680104486	396	0.00267219596295298	396	-0.00101620935846114	396	8.42128308876866E-4	396	-5.73887978035259E-4	396	-0.00289425479979322	396	-0.00327573261015424	396	-0.00318532512262415	396	6.40278679388651E-4	396	0.00174215728338467
397	0.00158317727191637	397	-0.00136892528042765	397	0.00268196967065482	397	0.00269429669655796	397	0.00162981772088777	397	-0.00516821127674394	397	0.00265194776982902	397	8.59848950434561E-4	397	-5.45247012298411E-4	397	-3.76709569011702E-4	397	0.00273430356013993	397	-0.00155974123943636	397	5.62570314571076E-4	397	-3.72045930284948E-4	397	-0.00182425544458109	397	-0.00157425667012134	397	-0.00396953239116105	397	6.69532922199956E-4	397	0.00198312610648621
398	0.00177563269418446	398	-0.00115258852644384	398	0.00291734613661898	398	0.00312137794340561	398	1.59621391254028E-4	398	-0.0151357240940477	398	8.74117528629981E-4	398	0.00164162173902582	398	-4.94515407494234E-4	398	4.18238608199673E-4	398	0.00226974795992607	398	-9.24323156284323E-4	398	8.33613044343067E-4	398	9.7961174647665E-6	398	-1.94256089369738E-4	398	3.07219269910952E-4	398	-0.00463338537168223	398	7.21112607946495E-4	398	0.00162142679213861
399	0.00150808811645309	399	-4.7625177245969E-4	399	0.00346504428742467	399	0.00378935556704363	399	-7.28355589592944E-4	399	-0.0213102372845206	399	0.00104658387976286	399	0.00192258378153376	399	6.78013177335401E-5	399	0.00114206360960623	399	0.00296574849347842	399	-4.4908007911193E-4	399	0.00164642256146059	399	4.74195293458379E-5	399	3.75864311399354E-4	399	0.00118963606946654	399	-0.00486717930419989	399	0.0015864132008474	399	0.0010392827882173
400	5.80543538720946E-4	400	7.00849815240545E-5	400	0.00287616102523724	400	0.00388953008507453	400	-6.50144557193144E-4	400	-0.0244747504749947	400	1.49050230896286E-4	400	0.00192354582404164	400	1.61476717609688E-4	400	4.45888611014134E-4	400	0.00176174902703163	400	3.61629980618616E-5	400	0.00144923207857905	400	0.00176999839619718	400	9.06088465503885E-4	400	0.00157000217718384	400	-0.00552097323671941	400	0.00139171379374936	400	-2.28612157053831E-5
401	1.29989609893855E-5	401	-6.33578264491064E-4	401	0.00253727776305013	401	0.00336970460310582	401	-3.01933524793796E-4	401	-0.0217592636654675	401	6.01516582030115E-4	401	0.00136450786654851	401	8.75152117485456E-4	401	0.00125971361242172	401	8.87749560583906E-4	401	2.21406075234576E-4	401	0.00180204159569623	401	0.00319257726304656	401	0.0022863126196091	401	0.00343036828490195	401	-0.00677476716923753	401	8.47014386651246E-4	401	-0.00160500521962792
402	-2.34545616742743E-4	402	-4.74220449967255E-4	402	3.98394500863652E-4	402	0.00416987912113687	402	5.16277507606411E-4	402	-0.0147037768559413	402	0.00106398293316445	402	0.00158546990905606	402	0.00220882751736173	402	2.83538613827794E-4	402	0.00106375009413728	402	-1.93350847591311E-4	402	0.0015448511128143	402	0.00528515612989633	402	0.00244653677371343	402	0.00430073439261847	402	-0.00623856110175591	402	0.00164231497955303	402	-0.0024171492235503
403	-0.00215209019447382	403	4.90532115520637E-4	403	-0.00947048876132417	403	0.00202005363916768	403	-0.00684551145999457	403	-0.0198482900464141	403	-0.00593355071570212	403	-0.00722356804843649	403	0.00268250291723771	403	-0.00972263638476445	403	-0.00786024937231122	403	-0.011728107770419	403	-0.00570233937006769	403	0.00657773499674708	403	0.00293676092781858	403	0.00447110050033661	403	-0.00306235503427477	403	-8.82384427545624E-4	403	-0.00565929322747216
404	-0.00780718851586659	404	9.35284681008675E-4	404	-0.0278393720235108	404	-0.00816977184280177	404	-0.0289073004275942	404	-0.0419298480970323	404	-0.0261704773779297	404	-0.0282942468379286	404	-9.53821682887046E-4	404	-0.0324011448477357	404	-0.0313128341615911	404	-0.038703442936538	404	-0.0261371512156339	404	0.00871031386359711	404	0.00311698508192304	404	0.00494146660805406	404	0.00252398293748257	404	-0.00729551338093337	404	-0.0113713125902946
405	-0.0139114714184796	405	7.60037246496204E-4	405	-0.0549882552856982	405	-0.0268295973247703	405	-0.0641790893951946	405	-0.0770118341857549	405	-0.0598061226239155	405	-0.0642183896060891	405	-0.00842014628301069	405	-0.070174579513286	405	-0.0700824324101843	405	-0.0802099988384963	405	-0.0613169414935342	405	0.00732289273044717	405	2.87209236026875E-4	405	-0.00107816728422794	405	0.0127105993738184	405	-0.0192886602653743	405	-0.0209641799330145
406	-0.0205957543210928	406	-3.6521018801583E-4	406	-0.0899849645792017	406	-0.0490652795563191	406	-0.108790585878715	406	-0.124893820274478	406	-0.104441767869903	406	-0.11189253237425	406	-0.0182838476091769	406	-0.123428014178835	406	-0.118112030658779	406	-0.132136554740454	406	-0.108526731771434	406	0.00301890585670961	406	-0.00665235421922628	406	-0.0155526342853394	406	0.0206372158101562	406	-0.039291807149815	406	-0.0357470472757342
407	-0.0277200372237063	407	-6.7045762252782E-4	407	-0.128684964579201	407	-0.0739810766260947	407	-0.160670704078233	407	-0.181125806363202	407	-0.15659741311589	407	-0.168206675142409	407	-0.0312974974985982	407	-0.187881448844385	407	-0.170661628907373	407	-0.196013110642411	407	-0.165586522049334	407	-0.00552011171782407	407	-0.0149919135099585	407	-0.0381973921317211	407	0.0183238322464936	407	-0.0674449540342543	407	-0.055379914618455
408	-0.0325243201263197	408	-0.00199570505704028	408	-0.161744964579201	408	-0.0969568736958699	408	-0.208910822277751	408	-0.232157792451924	408	-0.204873058361877	408	-0.22348081791057	408	-0.0461911473880194	408	-0.251634883509935	408	-0.216471227155968	408	-0.26097966654437	408	-0.227616312327234	408	-0.0165791292923574	408	-0.0236314728006892	408	-0.0678021499781041	408	0.00366044868283044	408	-0.098308100918695	408	-0.0772227819611739
409	-0.0330286030289324	409	-0.00296049185932024	409	-0.182284964579202	409	-0.109472670765646	409	-0.243020940477268	409	-0.264839778540647	409	-0.237388703607865	409	-0.261084960678731	409	-0.0617147972774408	409	-0.301448318175483	409	-0.250340825404562	409	-0.313176222446328	409	-0.284816102605135	409	-0.0319081468668898	409	-0.0344910320914202	409	-0.105376907824486	409	-0.0253829348808328	409	-0.130921247803136	409	-0.101345649303894
410	-0.0310128859315455	410	-0.0030836602363129	410	-0.189324964579201	410	-0.104358467835421	410	-0.258171058676787	410	-0.276441764629371	410	-0.248324348853851	410	-0.27479910344689	410	-0.0726684471668619	410	-0.325451752841033	410	-0.265770423653157	410	-0.348522778348286	410	-0.325515892883035	410	-0.0484071644414241	410	-0.042910591382153	410	-0.142331665670868	410	-0.0698263184444956	410	-0.160484394687577	410	-0.126478516646615
411	-0.0295375536287246	411	-0.00216682861330497	411	-0.186154964579202	411	-0.0931342649051965	411	-0.258311176876306	411	-0.27154483870568	411	-0.240588665964171	411	-0.267036853144479	411	-0.0804320970562831	411	-0.321120401256572	411	-0.266226231082699	411	-0.370031183895729	411	-0.352025056875053	411	-0.0633761820159569	411	-0.0468101506728837	411	-0.17359642351725	411	-0.120309365185852	411	-0.178907541572018	411	-0.147085625659059
412	-0.0247622213259033	412	-0.00268999699029671	412	-0.176092569036281	412	-0.085268270733736	412	-0.24601798636185	412	-0.256333664051334	412	-0.220332620855673	412	-0.244715586550092	412	-0.0871647252262351	412	-0.293590471603925	412	-0.2546810046525	412	-0.37671009389194	412	-0.36437405006183	412	-0.0753309947988559	412	-0.0467896201235716	412	-0.192628465098718	412	-0.164502320066579	412	-0.187460688456459	412	-0.160731164217792
413	-0.0191568890230824	413	-0.00297316536728864	413	-0.160361452298468	413	-0.0787443794151352	413	-0.224461193055612	413	-0.231592489396987	413	-0.192346575747174	413	-0.208424319955707	413	-0.089785960142363	413	-0.249720541951278	413	-0.232255778222302	413	-0.365339003888151	413	-0.359703043248606	413	-0.0836400737749807	413	-0.0457389670651063	413	-0.198485893591666	413	-0.192915274947307	413	-0.1881938353409	413	-0.168036702776527
414	-0.010981556720262	414	-0.00257633374428146	414	-0.141760335560654	414	-0.0747804880965344	414	-0.198624399749375	414	-0.208251314742639	414	-0.167790530638675	414	-0.172963053361321	414	-0.086137195058491	414	-0.200680612298632	414	-0.201640551792103	414	-0.338417913884363	414	-0.339562036435382	414	-0.0856991527511051	414	-0.0429083140066417	414	-0.190443322084614	414	-0.199328229828033	414	-0.18272698222534	414	-0.16700224133526
415	-0.00391622441744044	415	0.00544150835533319	415	-0.122589218822841	415	-0.077986596777933	415	-0.174567606443136	415	-0.187730140088292	415	-0.148914485530177	415	-0.143351786766934	415	-0.0802684299746188	415	-0.157230682645985	415	-0.167445325361904	415	-0.307666823880574	415	-0.31286102962216	415	-0.0818482317272302	415	-0.0394576609481767	415	-0.172440750577562	415	-0.184191184708761	415	-0.17122012910978	415	-0.158587779893994
416	0.00547910788537997	416	0.0208646767323248	416	-0.102528102085029	416	-0.0823727054593322	416	-0.157190813136899	416	-0.169988965433945	416	-0.135758440421679	416	-0.122390520172549	416	-0.0744496648907464	416	-0.124520752993338	416	-0.134270098931706	416	-0.274905733876785	416	-0.279970022808935	416	-0.0718273107033554	416	-0.0381070078897121	416	-0.14938817907051	416	-0.153644139589488	416	-0.16086327599422	416	-0.149313318452727
417	0.0121923922420581	417	0.0373078451093178	417	-0.0813669853472154	417	-0.079378814140731	417	-0.149084019830661	417	-0.149926650903443	417	-0.125112022236657	417	-0.107230272694223	417	-0.0653708998068749	417	-0.101422326264855	417	-0.106823560466574	417	-0.24002537117534	417	-0.24454049151666	417	-0.0570263896794803	417	-0.0385963548312471	417	-0.129015607563457	417	-0.119726982720961	417	-0.151556422878661	417	-0.140898857011461
418	0.0174095327603032	418	0.0525610134863097	418	-0.0625558686094037	418	-0.0735749228221296	418	-0.143527226524424	418	-0.131310916744476	418	-0.116874484822066	418	-0.0981630825640778	418	-0.0566521347230022	418	-0.0846084083088599	418	-0.0861430858966425	418	-0.207017190380926	418	-0.209995386787228	418	-0.0415454686556052	418	-0.0399857017727827	418	-0.113523036056406	418	-0.0934394906046734	418	-0.143239569763102	418	-0.134164395570194
419	0.0196366732785496	419	0.0641441818633011	419	-0.0493747518715901	419	-0.0669834081415077	419	-0.14004431763129	419	-0.114165182585509	419	-0.107076947407475	419	-0.0926158924339324	419	-0.049361504531154	419	-0.0710544903528643	419	-0.0708226113267107	419	-0.180569009586511	419	-0.177820282057797	419	-0.0284531483418906	419	-0.0390948685903698	419	-0.105472856527294	419	-0.0809719984883852	419	-0.132552716647543	419	-0.130649934128927
420	0.0202438137967951	420	0.0646173502402938	420	-0.0407936351337765	420	-0.0609642631601259	420	-0.138060235202416	420	-0.0994294484265419	420	-0.096419409992885	420	-0.0889587023037857	420	-0.0455305842113978	420	-0.0591805723968699	420	-0.061202136756779	420	-0.156200828792097	420	-0.150645177328365	420	-0.0194321659164247	420	-0.037894007388676	420	-0.100989937972529	420	-0.078384506372096	420	-0.122715863531984	420	-0.126895472687661
421	0.0204709543150408	421	0.0545391159820348	421	-0.0349325183959639	421	-0.0550951181787438	421	-0.130686152773542	421	-0.0841237142675748	421	-0.0874618725782943	421	-0.0855215121736403	421	-0.0422096638916418	421	-0.0480066544408739	421	-0.0548116621868484	421	-0.132382647997683	421	-0.129850072598934	421	-0.0159311834909577	421	-0.0347631461869824	421	-0.0981170194177636	421	-0.0839770142558081	421	-0.113069010416424	421	-0.121681011246395
422	0.019608094833286	422	0.0424138685475235	422	-0.0307014016581508	422	-0.0518859731973622	422	-0.117582070344668	422	-0.0705879801086073	422	-0.0801843351637039	422	-0.0819643220434951	422	-0.0397187435718847	422	-0.0385227364848788	422	-0.0500211876169168	422	-0.110604467203269	422	-0.113744967869502	422	-0.0174202010654909	422	-0.0321222849852898	422	-0.0946941008629985	422	-0.0908795221395193	422	-0.103452157300866	422	-0.115666549805127
423	0.017995235351532	423	0.0305986211130111	423	-0.0261302849203373	423	-0.0497768282159807	423	-0.103567987915794	423	-0.0594022459496415	423	-0.0728267977491139	423	-0.0772671319133496	423	-0.0366078232521287	423	-0.0314388185288834	423	-0.045300713046986	423	-0.0924662864088548	423	-0.10054986314007	423	-0.0206792186400246	423	-0.0282614237835954	423	-0.0899211823082346	423	-0.0944320300232304	423	-0.0940353041853061	423	-0.108342088363861
424	0.0159878649916561	424	0.0208033736784996	424	-0.0203291681825242	424	-0.0481476832345979	424	-0.0909139054869206	424	-0.0505467016771259	424	-0.0658983358647385	424	-0.0706524862767948	424	-0.0343769029323733	424	-0.0277687489382439	424	-0.0412361873337161	424	-0.0783405801319379	424	-0.0905591839897975	424	-0.0252282362145575	424	-0.0261605625819019	424	-0.0835682637534694	424	-0.0928942055418736	424	-0.0864584510697464	424	-0.0991876269225944
425	0.0144359837536596	425	0.0138481262439871	425	-0.0135210125321077	425	-0.0465288526403347	425	-0.0808598230580477	425	-0.043155233359192	425	-0.0611595041924495	425	-0.0645088584376747	425	-0.0303853993823164	425	-0.0257702186937481	425	-0.0368700411631107	425	-0.0675358636620205	425	-0.0821362750711891	425	-0.0285644413651784	425	-0.0242796386302819	425	-0.0752088923947287	425	-0.0887862481144888	425	-0.0794215979541875	425	-0.0897831654813279
426	0.0118541025156631	426	0.0102128788094751	426	-0.00614451932833138	426	-0.0451182294170875	426	-0.0722657406291729	426	-0.0379337650412577	426	-0.0583406725201607	426	-0.0586052305985563	426	-0.026872583564086	426	-0.0252516884492504	426	-0.0330138949925063	426	-0.0603811471921034	426	-0.0738033661525801	426	-0.0304443185619956	426	-0.0221485734913278	426	-0.0671700022270443	426	-0.0819182906871045	426	-0.0716847448386284	426	-0.0798787040400617
427	0.00967222127766743	427	0.0072876313749628	427	-0.00177802612455391	427	-0.0425076061938414	427	-0.065031658200299	427	-0.0345322967233237	427	-0.0554218408478713	427	-0.0518216027594365	427	-0.0238497677458547	427	-0.0253331582047531	427	-0.0290877488219019	427	-0.054666430722186	427	-0.0653804572339718	427	-0.0310641957588116	427	-0.020247508352373	427	-0.0588311120593596	427	-0.0743903332597187	427	-0.0651578917230689	427	-0.0701342425987947
428	0.00817034003967176	428	0.00643238394045031	428	-0.00171153292077708	428	-0.0396769829705939	428	-0.059017575771426	428	-0.0321108284053908	428	-0.0498430091755822	428	-0.0454979749203179	428	-0.0218069519276236	428	-0.0245246279602567	428	-0.0263016026512961	428	-0.0487517142522682	428	-0.0565375483153625	428	-0.0310040729556285	428	-0.0191564432134186	428	-0.0513622218916741	428	-0.0672423758323344	428	-0.05941103860751	428	-0.0608397811575285
429	0.00556845880167511	429	0.00664713650593907	429	-0.0052150397170001	429	-0.0352463597473474	429	-0.0538134933425516	429	-0.0280793600874567	429	-0.0449441775032939	429	-0.0411843470811988	429	-0.0205141361093926	429	-0.0219960977157596	429	-0.0242554564806916	429	-0.0414769977823504	429	-0.048474639396753	429	-0.0284539501524446	429	-0.0175453780744643	429	-0.0428233317239899	429	-0.0600544184049499	429	-0.0530941854919504	429	-0.0520253197162619
430	0.00358657756367897	430	0.00702188907142709	430	-0.0125585465132234	430	-0.0315957365241006	430	-0.0469194109136781	430	-0.0247313632865547	430	-0.0399551500793427	430	-0.0365912635488321	430	-0.0205013202911619	430	-0.0186484181366815	430	-0.0215382219062272	430	-0.0362329990695072	430	-0.0415803368729346	430	-0.025563827349262	430	-0.0166843129355092	430	-0.0364044415563054	430	-0.0535263746159256	430	-0.0474873323763916	430	-0.0455445745555556
431	0.00266646264286408	431	0.00674664163691485	431	-0.0213720533094461	431	-0.0286651133008533	431	-0.0414653284848034	431	-0.0212553354640006	431	-0.0347352221977504	431	-0.0320206838275254	431	-0.0196085044729299	431	-0.0155146516185294	431	-0.0192259806740092	431	-0.0315323020392073	431	-0.0365896237651491	431	-0.0217937045460781	431	-0.0165132477965546	431	-0.0302755513886206	431	-0.0481879335633639	431	-0.0437704792608322	431	-0.0397709242854285
432	0.00172360316110964	432	0.00741139420240255	432	-0.0263945924551416	432	-0.0264082835392383	432	-0.0380932792139532	432	-0.0197293076414473	432	-0.0288652943161569	432	-0.0290301041062184	432	-0.0187544618338995	432	-0.0121908851003782	432	-0.0175437394417912	432	-0.0265216050089085	432	-0.0323389106573622	432	-0.0183004830773763	432	-0.0156920328591301	432	-0.0254716669755171	432	-0.0426294925108035	432	-0.0406736261452734	432	-0.0357372740153021
433	0.00104074367935514	433	0.00673614676789125	433	-0.0281534757173283	433	-0.0236727182648346	433	-0.0354219076624434	433	-0.0180132798188932	433	-0.0262353664345643	433	-0.0274495243849113	433	-0.0187400102546036	433	-0.00836711858222561	433	-0.0153914982095733	433	-0.0228709079786089	433	-0.0286181975495765	433	-0.0138895620535004	433	-0.015490767988882	433	-0.0223861178139408	433	-0.0380510514582415	433	-0.0369067730297141	433	-0.0317736237451758
434	0.0019878841976011	434	0.00493844680009037	434	-0.0264023589795155	434	-0.0232371529904301	434	-0.0318105361109344	434	-0.0166572519963397	434	-0.0240254385529708	434	-0.0256589446636051	434	-0.0178655586753074	434	-0.00504335206407447	434	-0.0129392569773552	434	-0.0221002109483095	434	-0.0273874844417898	434	-0.0110586410296261	434	-0.013809503118634	434	-0.0207005686523649	434	-0.0343226104056802	434	-0.0332599199141548	434	-0.0293399734750484
435	0.0022250247158464	435	0.00356418910362599	435	-0.0201312422417033	435	-0.0227815877160253	435	-0.0310891645594245	435	-0.0150812241737857	435	-0.0215055106713775	435	-0.024828364942298	435	-0.0156911070960097	435	-0.00349958554592256	435	-0.0115370157451373	435	-0.0195195139180093	435	-0.0259267713340039	435	-0.00819772000575103	435	-0.011728238248387	435	-0.0184150194907877	435	-0.031134169353118	435	-0.0309330667985952	435	-0.0257063232049211
436	0.00208216523409188	436	0.00344993140716188	436	-0.0132701255038903	436	-0.0220760224416221	436	-0.0307277930079142	436	-0.0145351963512317	436	-0.0188055827897839	436	-0.0236177852209911	436	-0.0139566555167141	436	-9.05819027771315E-4	436	-0.0093747745129189	436	-0.0151688168877104	436	-0.0258460582262181	436	-0.00698679898187571	436	-0.00974697337813879	436	-0.0173894703292117	436	-0.0284157283005575	436	-0.0283462136830357	436	-0.0229326729347941
437	0.00216930575233754	437	0.00252567371069734	437	-0.00751900876607703	437	-0.0207704571672176	437	-0.027966421456405	437	-0.0134653003916032	437	-0.018155077519034	437	-0.0225188344640701	437	-0.0128922039374171	437	7.55286228185881E-4	437	-0.00738834280191636	437	-0.0118510606426003	437	-0.0262853790759454	437	-0.00591587795800042	437	-0.0092257085078904	437	-0.0155639211676357	437	-0.0254569645727587	437	-0.025354622309762	437	-0.0199256440546485
438	0.00198832750857925	438	0.00112141601423321	438	-0.00348063428367773	438	-0.0189964707671422	438	-0.0247450499048947	438	-0.0117788110224879	438	-0.0161642514765301	438	-0.0215907886873614	438	-0.0113374877381869	438	0.00297491300514441	438	-0.00611958304714566	438	-0.00844493816704084	438	-0.025700274346514	438	-0.00561011043810478	438	-0.00729440603661846	438	-0.0129558508844605	438	-0.023088021580941	438	-0.0231603985710906	438	-0.0173511826133819
439	0.00104734926482219	439	5.37158317769126E-4	439	-0.00164377727401543	439	-0.018749115639249	439	-0.0209436783533841	439	-0.0107023216533726	439	-0.0145234254340263	439	-0.0211927429106531	439	-0.00970166013523421	439	0.00367453978210364	439	-0.00474082329237469	439	-0.00554881569148158	439	-0.0234751696170825	439	-0.00335998763492196	439	-0.00648294564104468	439	-0.0102891918905694	439	-0.0213790785891232	439	-0.0222461748324196	439	-0.0150267211721156
440	7.7637102106376E-4	440	5.6290062130504E-4	440	-0.0021669202643535	440	-0.0181817605113563	440	-0.0173623068018749	440	-0.0101358322842575	440	-0.0135825993915217	440	-0.0185946971339455	440	-0.00978583253228127	440	0.00468416655906267	440	-0.00322206353760279	440	-0.00351269321592085	440	-0.0213100648876514	440	-0.00220986483173835	440	-0.00565148524547077	440	-0.00792253289667766	440	-0.0203701355973047	440	-0.0203719510937486	440	-0.0129322597308494
441	8.8539277730515E-4	441	9.5024266725563E-4	441	-0.00286006325469224	441	-0.0181844053834634	441	-0.0149009352503651	441	-0.0101993429151435	441	-0.0127017733490185	441	-0.0162666513572383	441	-0.010040004929329	441	0.00465379333602112	441	-0.00188330378283208	441	-0.00199657074036086	441	-0.0187849601582188	441	-8.69742028554832E-4	441	-0.00545002484989698	441	-0.00563587390278641	441	-0.0194311926054871	441	-0.0182377273550776	441	-0.0118277982895822
442	1.0441453354737E-4	442	0.00175499523274425	442	-0.00644320624502992	442	-0.0175270502555707	442	-0.0130195636988546	442	-0.0092128535460283	442	-0.011170947306514	442	-0.0146586055805296	442	-0.0104041773263761	442	0.00444342011298016	442	-0.00158454402806019	442	-9.7044826480186E-4	442	-0.0163898554287885	442	-9.39619225371224E-4	442	-0.00405856445432295	442	-0.00466921490889582	442	-0.0187322496136675	442	-0.0171235036164052	442	-0.0106133368483157
443	1.03436289789371E-4	443	0.00211974779823176	443	-0.00941634923536849	443	-0.0155996951276771	443	-0.0101381921473447	443	-0.00929970882941866	443	-0.0109900462519548	443	-0.0119907762078979	443	-0.0101283497234226	443	0.00290267020179158	443	-0.00156504048934281	443	-8.1487564341387E-4	443	-0.0151430783731037	443	-1.3949642218769E-4	443	-0.00410710405874948	443	-0.00435255591500372	443	-0.0177432508804216	443	-0.0155992798777342	443	-0.00952999029121759
444	5.07721419350737E-4	444	0.00304450036372028	444	-0.0119994922257058	444	-0.0129923399997844	444	-0.00963682059583526	444	-0.00773443621701198	444	-0.0108685200969338	444	-0.010214750202576	444	-0.0091525221204698	444	0.00102878122271122	444	-0.00164933875107831	444	4.2611485987365E-4	444	-0.0137423652653181	444	-0.00115937361900453	444	-0.0038456436631753	444	-0.00396589692111249	444	-0.0163837876352648	444	-0.014645056139063	444	-0.00782593443552049
445	8.87796668870955E-4	445	0.00306925292920823	445	-0.0149626352160448	445	-0.0104452420040397	445	-0.0085414279838032	445	-0.00499916360460606	445	-0.0108769939419142	445	-0.0107287241972527	445	-0.00728598610509135	445	1.74892243630431E-4	445	-0.00142363701281401	445	6.97105363160588E-4	445	-0.0128416521575323	445	-0.00191493706523804	445	-0.00324406185339399	445	-0.00412519703105207	445	-0.0157843243901095	445	-0.0138208324003921	445	-0.00676187857982402
446	9.17871918390212E-4	446	0.00127400549469581	446	-0.0172257782063827	446	-0.00866314053892836	446	-0.00653129597328928	446	-0.00291389099220041	446	-0.00995546778689338	446	-0.0114326981919293	446	-0.00605904221589082	446	-5.08996735449685E-4	446	-0.00120793527454932	446	-4.11904133550856E-4	446	-0.0105609390497454	446	-0.00283407744295427	446	-0.0029624101384611	446	-0.00368186753410615	446	-0.0139248611449547	446	-0.0135266086617207	446	-0.00505782272412691
447	0.00142794716790995	447	-7.42978629403979E-4	447	-0.0164389211967215	447	-0.00646103907381512	447	-0.00459116396277537	447	-0.00148861837979464	447	-0.0100639416318726	447	-0.011566672186607	447	-0.00594209832669179	447	-9.28857145297002E-5	447	-8.62233536284229E-4	447	-0.00132091363026277	447	-0.00792022594195974	447	-0.00216321782067119	447	-0.00271075842352975	447	-0.00245853803716045	447	-0.0123353978997995	447	-0.0113023849230505	447	-0.00276376686842994
448	0.00185802241743005	448	-1.57236325867061E-4	448	-0.0157920641870595	448	-0.00675893760870405	448	-0.00429103195226244	448	9.36654232611467E-4	448	-0.00888241547685276	448	-0.0120106461812846	448	-0.00558515443749208	448	0.00103322530639005	448	-1.86531798020084E-4	448	-0.0026199231269759	448	-0.00584951283417379	448	-0.00279235819838863	448	-0.00216910670859694	448	-7.65208540214779E-4	448	-0.0102059346546435	448	-0.0104681611843791	448	-0.00163971101273308
449	0.00177809766694903	449	-4.71494022331598E-4	449	-0.0140152071773976	449	-0.00703683614359107	449	-0.00372089994174907	449	3.819268450167E-4	449	-0.00656088932183163	449	-0.0115246201759609	449	-0.00452821054829222	449	0.00296933632730934	449	0.00128916994024486	449	-0.00435893262368836	449	-0.00492879972638693	449	-0.00311149857610449	449	-0.00197745499366508	449	4.98120956731185E-4	449	-0.00894647140948823	449	-0.00773393744570772	449	-0.00161565515703632
450	9.68172916469001E-4	450	-2.45751718795262E-4	450	-0.0126483501677352	450	-0.00744473467847939	450	-0.00142076793123547	450	-0.00175874659147457	450	-0.00497907627302663	450	-0.0111594545124509	450	-0.00461126665909273	450	0.00548379490772177	450	0.00149908050389946	450	-0.00534111923979186	450	-0.00370146522862047	450	-0.00327063895382107	450	-0.00179580327873285	450	5.31450453676641E-4	450	-0.00698670041152294	450	-0.00576550192240077	450	-0.00125828860634858
451	3.73285790749023E-4	451	9.89990584740141E-4	451	-0.0120272334299232	451	-0.00755200166363501	451	-9.03200436434659E-4	451	-8.93879564637601E-4	451	-0.00410704805388296	451	-0.00995493410529846	451	-0.00433425688152056	451	0.00800701415775507	451	9.72147686598035E-4	451	-0.00528568869543911	451	-0.00461416468836529	451	-0.00273984073313027	451	-0.00198413717046275	451	6.83782766835783E-4	451	-0.00704669859895013	451	-0.00408390756061827	451	-6.35939034418165E-4
452	2.93436289789284E-4	452	0.00307573288827623	452	-0.0119249999542967	452	-0.00836169005201093	452	2.03592869802982E-4	452	5.00987462197955E-4	452	-0.0039150198347393	452	-0.00928041369814636	452	-0.00332645644348428	452	0.00975023340778769	452	0.00238521486929688	452	-0.00385025815108619	452	-0.00511686414811141	452	-0.00295977933153857	452	-0.00212229834214028	452	3.24148874552677E-4	452	-0.00708669678637808	452	-0.00407231319883561	452	-0.00203358946248677
453	-3.26413211172216E-4	453	0.00328881723776231	453	-0.0111227664786711	453	-0.00739137844038851	453	0.00102038617604094	453	0.0012858544890344	453	-0.00391299161559555	453	-0.00811589329099505	453	-0.00341865600544722	453	0.01049345265782	453	0.00351828205199478	453	-3.54827606733998E-4	453	-0.00563956360785678	453	-0.00285971792994655	453	-0.00236045951381758	453	-6.35485017729032E-4	453	-0.00647669497380399	453	-0.00399071883705115	453	-0.00242123989055631
454	-2.46262712131795E-4	454	0.00295832236873839	454	-0.0119305330030457	454	-0.00493106682876476	454	9.37179482278339E-4	454	0.00131072151587031	454	-0.00581096339645182	454	-0.00649137288384161	454	-0.00485085556741005	454	0.0121066719078522	454	0.00269134923469316	454	0.00172060293761866	454	-0.00696226306760206	454	-0.00284965652835467	454	-0.00354862068549533	454	-0.00137511891001196	454	-0.00609669316123096	454	-0.00492912447526894	454	-0.00318889031862479
455	0.00118388778690814	455	0.0029478274997139	455	-0.0107682995274194	455	-0.00314075521714052	455	-8.36027211484236E-4	455	0.00235558854270668	455	-0.00649893517730771	455	-0.00505685247668985	455	-0.00457305512937367	455	0.00991989115788527	455	0.00185441641739192	455	0.00258603348197184	455	-0.00672496252734778	455	-0.00239959512676347	455	-0.00464678185717204	455	-7.647528022936E-4	455	-0.00622669134865905	455	-0.00450753011348581	455	-0.00317654074669438
456	0.00166403828594763	456	0.00236733263069056	456	-0.0107960660517934	456	-9.30443605517972E-4	456	-3.99233905246099E-4	456	0.00111141560868777	456	-0.00551689610046058	456	-0.00508236747757262	456	-0.00524525469133597	456	0.00696302941557025	456	0.00128776177528156	456	0.00259127002766135	456	-0.00418733681254491	456	-0.00283953372517143	456	-0.00489494302884985	456	-1.44386694576504E-4	456	-0.00514666964746091	456	-0.00437619898824249	456	-0.00291553832646674
457	9.74188784987007E-4	457	6.26837761666721E-4	457	-0.0104638325761677	457	2.19868006105628E-4	457	-0.00191244059900875	457	2.93163731578616E-4	457	-0.00385456386558758	457	-0.00418883849537721	457	-0.00483745425329918	457	0.00483398087986942	457	-7.81382136645803E-4	457	0.00129126860945128	457	-0.00342093138491695	457	-0.00197947232357976	457	-0.00405310420052718	457	2.9597941314119E-4	457	-0.00454611095338997	457	-0.0028019752495716	457	-0.00137090900222514
458	7.56782846887738E-4	458	-1.83657107357682E-4	458	-0.010065256355178	458	4.13351459922495E-5	458	-0.00374417551598061	458	-7.75088145529956E-4	458	-0.00321223163071416	458	-0.00337530951318232	458	-0.00429934393240483	458	0.00328493234416882	458	-0.00240052604857333	458	-0.00104873280875761	458	-0.0031545259572896	458	-6.99410921987997E-4	458	-0.00278117040104231	458	0.00147288353973707	458	-0.00564555225931951	458	-0.00239775151090083	458	-4.62796779849839E-5
459	6.66858096407097E-4	459	-3.94151976381707E-4	459	-0.00982265907366742	459	3.80168515749624E-4	459	-0.00329862175073803	459	3.66599773622411E-5	459	-0.00226989939584143	459	-0.00350178053098738	459	-0.00317094668293993	459	9.25883808466921E-4	459	-0.00261966996050145	459	-0.00159873422696766	459	-0.00329812052966094	459	1.40650479603543E-4	459	-0.00156914866529689	459	6.47322868998046E-4	459	-0.00576499356524884	459	-0.0018935277722294	459	0.00145834964625635
460	-1.53066654072553E-4	460	-0.00134173886452427	460	-0.00899006179215611	460	4.49001885508338E-4	460	-0.00236306798549712	460	5.48408100252473E-4	460	-0.00227756716096916	460	-0.00342825154879289	460	-0.00252254943347463	460	0.00157683527276564	460	-0.00169881387242921	460	-0.003108735645176	460	-0.00273171510203429	460	7.07118811957841E-5	460	-0.0010371269295506	460	-6.08237801741573E-4	460	-0.00567443487117814	460	-0.0017193040335588	460	0.00130297897049747
461	-5.62991404553514E-4	461	-0.0015701546760285	461	-0.00715746451064536	461	2.87835255265989E-4	461	-0.00277751422025663	461	9.00156223143433E-4	461	-0.00380523492609619	461	-0.00246472256659835	461	-0.00131415218400832	461	0.00269778673706522	461	1.62042215642977E-4	461	-0.00483873706338578	461	-0.00293530967440692	461	7.70773282787296E-4	461	-4.55105193805316E-4	461	-9.83798472480757E-4	461	-0.00578387617710785	461	-0.00136508029488702	461	9.87608294738429E-4
462	5.77083844966353E-4	462	-0.0012185704875316	462	-0.00502486722913442	462	4.96668625024732E-4	462	-0.00215196045501553	462	0.00172190434603525	462	-0.00498290269122315	462	-0.00141119358440367	462	-0.00142575493454356	462	0.00406873820136422	462	0.00207289830371504	462	-0.00482873848159571	462	-0.00252890424677865	462	4.80834684378983E-4	462	-0.00122308345805955	462	-6.39359143219664E-4	462	-0.00515331748303716	462	-0.00269085655621648	462	-9.77623810207717E-5
463	7.87159094486789E-4	463	-8.56986299035967E-4	463	-0.00451226994762433	463	4.65501994782791E-4	463	-7.64066897742666E-5	463	0.00316064548696371	463	-0.0045905174726828	463	-0.00263790322808077	463	-0.00158735768507867	463	0.00488886776537267	463	0.0031278605749403	463	-0.00283126517215493	463	-0.00281937285427336	463	-5.79103914029488E-4	463	-0.0029210617223141	463	-9.24919813958702E-4	463	-0.00297247119117738	463	-0.00141294750598853	463	-0.00115037083834668
464	5.17234344006745E-4	464	-0.00116540211053984	464	-0.00394967266611346	464	-2.45664635459164E-4	464	6.1914707546773E-4	464	0.00362637964593127	464	-0.0027780792704748	464	-0.00385485149762843	464	-0.00289896043561289	464	0.00477817542908987	464	0.00371692902931997	464	-0.00173631713506417	464	-7.56715496889271E-4	464	-0.00138904251243765	464	-0.00241903998656845	464	5.09519515301982E-4	464	-0.00147133730152849	464	-0.00110135314420567	464	-0.00168021707723742
465	0.00114640659928789	465	4.46182077956436E-4	465	-0.00525336410753408	465	-0.0013641905568349	465	3.19081070211169E-4	465	0.00251211380489824	465	-9.15641068266915E-4	465	-0.00456179976717763	465	-0.00352023907651322	465	0.00413748309280759	465	0.00408599748369909	465	9.18630902026152E-4	465	-9.34058139505645E-4	465	-0.00202365724632703	465	-0.00216684642249909	465	0.00219642364189809	465	-2.40203411880024E-4	465	-5.09758782422765E-4	465	-0.00119006331613036
466	0.00186557885457006	466	0.00102129256529526	466	-0.00646650709787178	466	-0.00279061084985788	466	0.0016459902741337	466	0.00224784796386501	466	-3.33202866057647E-4	466	-0.00609874803672739	466	-0.00348150475303033	466	0.00503679075652563	466	0.00303506593807867	466	0.00270357893911566	466	-0.00146140078212209	466	-0.00226285902563461	466	-0.00206464598529799	466	0.00255382636038703	466	2.00930477768146E-4	466	-2.8164420640131E-5	466	-0.00130990955502153
467	0.00144475110985187	467	0.00147604513078292	467	-0.00908965008821028	467	-0.00398703114288068	467	0.00306289947805727	467	0.00165358212283273	467	-7.3076466384947E-4	467	-0.00662569630627541	467	-0.00245277042954584	467	0.00371609842024334	467	0.00348413439245832	467	0.00327852697620568	467	-0.00224874342473846	467	-0.00222206080494303	467	-0.00243244554809685	467	0.00169122907887598	467	-2.07935632583478E-4	467	6.73429941143056E-4	467	-0.00110975579391326
468	0.00116392336513282	468	8.10797696271237E-4	468	-0.00971279307854811	468	-0.0039634514359026	468	0.00226980868198101	468	9.19316281799532E-4	468	-0.00292832646164065	468	-0.00646264457582468	468	-7.7403610606197E-4	468	0.00276540608396214	468	0.00293320284683762	468	0.0031234750132958	468	-0.0016660860673543	468	-0.00232126258425147	468	-0.00230024511089599	468	0.00121863179736526	468	-0.00190680174293512	468	4.25024302925792E-4	468	-5.59602032805806E-4
469	6.23095620414738E-4	469	8.55550261759319E-4	469	-0.0089059360688859	469	-0.00413987172892494	469	0.0013767178859041	469	-7.04949559234613E-4	469	-0.00448588825943297	469	-0.00489959284537278	469	0.0010346982174223	469	0.00246471374767943	469	0.00241227130121757	469	0.00368842305038619	469	-0.00214342870997086	469	-0.00130046436355968	469	-0.00304804467369468	469	3.06034515854314E-4	469	-0.00270566785328619	469	9.56618664708309E-4	469	0.00115055172830303
470	-4.0773212430345E-4	470	-3.896971727535E-4	470	-0.00784907905922427	470	-0.00302629202194815	470	0.00246362708982772	470	-0.00121709103493739	470	-0.00590353884967421	470	-0.00296650551207556	470	0.00150343254090668	470	0.00293303801794931	470	0.00240957918431572	470	0.00343912111040012	470	-0.00203077135258578	470	-9.49666142868288E-4	470	-0.00283584423649419	470	-3.66562765655942E-4	470	-0.00371396165075311	470	5.18033599734125E-4	470	0.00230534893551759
471	-0.00113581530808293	471	-0.0011249446072652	471	-0.00697311721313731	471	-9.79609045786312E-4	471	0.00187053629375011	471	-0.00193878346007459	471	-0.00684119272852435	471	-0.00167341686015288	471	7.52198096483525E-4	471	0.0017513258662385	471	0.00276719223144095	471	0.00367966176385703	471	-0.00147811399520226	471	-0.00104886792217673	471	-0.00294357332996142	471	-7.41102253718928E-4	471	-0.00399223425144601	471	-5.03891444007643E-4	471	0.00175624404814378
472	-5.65664809043298E-4	472	-0.00177019204177764	472	-0.00535514346566313	472	7.40702565837026E-4	472	7.57445497673537E-4	472	-0.00275047588521016	472	-0.00589884660737461	472	-0.00176032820823213	472	8.10097565766554E-5	472	0.00167961371453007	472	0.00247480527856592	472	0.00375020241731328	472	-0.00275545663781784	472	-0.001528069701485	472	-0.00195119839727287	472	-2.05175475262109E-4	472	-0.00432050685213881	472	-3.45816487750561E-4	472	6.9713916077152E-4
473	-1.0551431000394E-4	473	-0.00123713155980365	473	-0.00405716971818837	473	0.00113101417746098	473	0.00117435470159766	473	-0.00286216831034647	473	-0.00486650048622472	473	-0.00187723955631025	473	-6.80178583329472E-4	473	0.00195790156281994	473	0.00218241832569088	473	0.00134074307076837	473	-0.00507279928043403	473	-0.00100727148079294	473	-8.78823464583789E-4	473	-0.00113924869680559	473	-0.00341877945283198	473	-7.7741531494091E-5	473	4.80342733970573E-5
474	4.84636189036713E-4	474	-7.73963182812309E-4	474	-0.00316919597071319	474	5.81325789084985E-4	474	0.00262126390552009	474	-0.00112386073548265	474	-0.00551415436507519	474	-0.00242415090438808	474	-6.21366923235556E-4	474	0.00163618941110943	474	0.00177003137281506	474	-0.00153871627577562	474	-0.00595014192305054	474	-0.00148647326010121	474	2.73551468105815E-4	474	-0.00137332191834894	474	-0.00300705205352436	474	-1.49666575236296E-4	474	-0.00145107061397631
475	2.54786688076436E-4	475	-0.00114079480582063	475	-0.00147122222323848	475	1.41637400707495E-4	475	7.48173109443862E-4	475	-2.55531606194737E-5	475	-0.00459180824392558	475	-0.0022310622524655	475	-7.5255526314244E-4	475	-1.25522740600736E-4	475	5.67644419941615E-4	475	-0.00319817562231961	475	-0.00652748456566687	475	-7.9567503940936E-4	475	7.45926400794517E-4	475	-0.00251739513989335	475	-0.00149532465421753	475	-5.61591618978952E-4	475	-0.0022901755013498
476	1.34937187115547E-4	476	-6.87626428828914E-4	476	-3.2324847576426E-4	476	4.3194901233079E-4	476	1.35082313367008E-4	476	1.63531627870306E-4	476	-0.00207958646396911	476	-6.97737417108435E-4	476	4.5625639695146E-4	476	-0.00200740453385784	476	1.58729075808495E-4	476	-0.00310945361557202	476	-0.00613159598205201	476	-3.84876818717572E-4	476	0.00132830133348349	476	-0.00256146836143678	476	5.66649552631304E-5	476	-1.21945079740726E-4	476	-0.00106635734824856
477	-0.00142491231384412	477	-1.84458051835534E-4	477	-8.52747282893418E-5	477	-7.67739376044574E-4	477	-8.3800848270954E-4	477	-1.23013965471763E-4	477	-8.37530472271197E-4	477	0.00102590232949762	477	0.0012650680570454	477	-0.00207951251584326	477	4.44442543331647E-4	477	-0.00347315647110236	477	-0.00360806576346471	477	-4.34078598027021E-4	477	0.00128067626617234	477	-0.00255554158298033	477	0.00117900417830885	477	3.33130236806589E-4	477	6.64691525486205E-4
478	-0.001589724190044	478	-2.712896748438E-4	478	-4.1415799047595E-4	478	-5.90792328996947E-4	478	-0.00256943500397533	478	-0.00152955955881495	478	0.00119452551942612	478	0.00342954207610369	478	0.00111372549192001	478	-0.00204162049782841	478	8.80156010856226E-4	478	-0.00211685932663297	478	7.85464455122852E-4	478	-0.00124448407245659	478	6.73195289993878E-4	478	-0.00130930502106974	478	0.00180134340135485	478	8.382055533529E-4	478	0.0016257403992217
479	-0.00115949844148577	479	0.0126772838223914	479	-9.41560708965561E-4	479	5.90997524491321E-4	479	-0.00381783165709493	479	-0.00365610515215842	479	0.00204658151112369	479	0.00248318182270957	479	6.32354885845565E-4	479	-5.33728479813256E-4	479	0.00103586947837897	479	-0.00189056218216344	479	0.00360899467371034	479	-0.00137329021872734	479	-0.00175425948779662	479	-9.30121348963198E-5	479	0.00176368262440096	479	9.23280869900012E-4	479	0.00281678927295648
480	-7.99272692924902E-4	480	0.0372478782728392	480	-0.00212896342745417	480	5.27873779807564E-5	480	-0.00305622831021335	480	-0.00257265074550173	480	0.0015786375028215	480	1.68215693152618E-5	480	2.40984279771261E-4	480	0.00156416353820088	480	0.00172158294590297	480	-0.00258426503769549	480	0.00538252489229761	480	-5.72096364996888E-4	480	-0.00221171426558797	480	0.00166328075127797	480	6.76021847446862E-4	480	0.00147835618644621	480	0.00282783814669152
481	2.09530556336546E-5	481	0.0613084727232867	481	-0.00350636614594357	481	-8.45422768531279E-4	481	-0.00399462496333225	481	-0.00191919633884474	481	8.80693494519136E-4	481	-0.0031495386840783	481	-4.303863263031E-4	481	0.00371205555621579	481	0.00194729641342661	481	-0.00284796789322606	481	0.00767605511088563	481	-6.7090251126789E-4	481	-0.00204916904337882	481	0.00192957363745183	481	-0.00101163892950762	481	0.00229343150299233	481	0.00238888702042583
482	7.11178804192691E-4	482	0.083189067173735	482	-0.00350376886443282	482	-7.43632915042092E-4	482	-0.00468302161645084	482	-0.00246574193218763	482	3.52749486216553E-4	482	-0.00447589893747224	482	-0.00119175693237761	482	0.00447994757423054	482	0.0015930098809509	482	-0.00150167074875629	482	0.0112195853294734	482	5.02913424620388E-5	482	-0.00224662382116936	482	9.25866523625807E-4	482	-0.00228929970646252	482	0.00214850681953926	482	0.00131993589416091
483	5.51404552752821E-4	483	0.101389661624183	483	-0.00304117158292083	483	-0.00136184306155318	483	-0.00323141826956963	483	-0.00192822896004596	483	-8.65630395162853E-4	483	-0.00574130805881445	483	-0.00128312753845083	483	0.00519804330195761	483	0.00262474821552416	483	-0.00144878125395298	483	0.0133259575074289	483	9.91485196191633E-4	483	-0.00198407859896133	483	6.21594097989231E-5	483	-0.00327639786036382	483	0.00134552845271951	483	9.09114131621536E-4
484	-1.98369698687806E-4	484	0.103940256074631	484	-0.00255921370396539	484	-0.00274242151955839	484	-0.00320344171336018	484	5.91771039954558E-4	484	-7.64062581311009E-4	484	-0.00487660304431081	484	-0.00249458993308682	484	0.00512616347485029	484	0.0035572095341454	484	-0.00131630067710908	484	0.0141926707205098	484	0.00181541819381792	484	-0.00101148546803476	484	-0.00146919555522107	484	-0.00299342849949902	484	0.00117278364389595	484	-2.30732107270981E-4
485	-2.6570038726792E-4	485	0.0926073242262353	485	-0.00132549968464168	485	-0.0028988418125806	485	-0.00260307790747571	485	9.1177103995399E-4	485	4.17505232541693E-4	485	-0.00320189802980675	485	-0.0024562787395066	485	0.00347428364774238	485	0.00238967085276531	485	-0.00200382010026434	485	0.0130693839335905	485	5.67441079722286E-4	485	-9.08774162272863E-4	485	-0.00178141521985076	485	-0.00154045913863499	485	0.00189003883507244	485	-7.80578346162741E-4
486	-9.25549888228794E-4	486	0.0787715819227	486	-4.81785665317425E-4	486	-0.00283526210560314	486	-0.00197271410159061	486	9.217710399545E-4	486	7.99073046393595E-4	486	-0.00303719301530236	486	-0.00204796754592529	486	0.00230240382063496	486	0.00144213217138578	486	-0.00255133952342046	486	0.00898609714667131	486	7.39463965625298E-4	486	-0.00129606285651107	486	-0.00179363488448114	486	-3.27489777769863E-4	486	0.00135729402624918	486	-8.70424585054153E-4
487	-1.45399389188228E-4	487	0.0665858396191643	487	6.19283540066462E-5	487	-0.00135168239862526	487	-0.0010323502957057	487	3.81771039954515E-4	487	2.8064086024493E-4	487	-0.00348248800079887	487	-0.00162965635234524	487	7.10523993527445E-4	487	-2.95406509994045E-4	487	-0.00398885894657663	487	0.00469281035975122	487	7.41486851530304E-4	487	-1.93351550748844E-4	487	-7.35854549111181E-4	487	0.00127547958309471	487	0.00138454921742603	487	1.09729176053897E-4
488	7.47511098513343E-5	488	0.0564400973156278	488	5.64237332945083E-6	488	-4.08102691647372E-4	488	-0.00168198648982099	488	1.5177103995434E-4	488	-4.2779132590276E-4	488	-0.00426778298629493	488	-0.0025613451587656	488	-9.21355833580328E-4	488	-0.00204294519137349	488	-0.00340637836973201	488	-3.0047642716724E-4	488	0.00103350973743321	488	1.79359755013486E-4	488	1.91925786258373E-4	488	0.00160844894395851	488	0.00195180440860288	488	5.5988293716247E-4
489	-2.65098391108332E-4	489	0.0488743550120923	489	-5.06436073468564E-5	489	1.8547701532956E-4	489	-0.00128162268393606	489	-5.86977613377115E-4	489	0.00100353140714926	489	-0.00488251388567917	489	-0.00117303396518409	489	-0.00195293140578912	489	-0.00203888812540143	489	-0.00100489092246292	489	-0.00316402292016083	489	7.95532623337536E-4	489	0.00185207106077456	489	0.00119970612162668	489	0.00194164989478818	489	0.00147984847350724	489	0.00111003669827081
490	3.35052107930167E-4	490	0.0431886127085566	490	9.30704119772585E-5	490	1.69056722307381E-4	490	-9.2125887805139E-4	490	-9.25473842705138E-4	490	0.0015744129947608	490	-0.00635622943006364	490	-2.47227716041465E-5	490	-7.83959319178962E-4	490	-0.00164195871419537	490	0.00253480889157309	490	-0.00256003688408502	490	0.00106755550924209	490	0.00163478236653702	490	0.00167748645699728	490	1.75267707551718E-4	490	5.39312511121715E-4	490	0.00165019045937864
491	-3.94797393028945E-4	491	0.0393428704050205	491	0.00166173758443833	491	-4.11363848265012E-4	491	5.40996801533744E-4	491	4.76029927965804E-4	491	9.95294582372352E-4	491	-0.0058599449744472	491	-1.06245267435412E-4	491	-4.84987232569623E-4	491	-0.00133502930299034	491	0.003804508705608	491	1.43949151991229E-4	491	0.00105312740837338	491	0.00109761196745595	491	0.0022110610866477	491	-6.81114479684553E-4	491	8.3877654873632E-4	491	0.00170034422048637
492	-0.00117238591827284	492	0.0356238860662668	492	0.00202433486594877	492	-0.00182957399477601	492	0.00139605475037641	492	0.00324753369863817	492	0.00198617616998487	492	-0.00546366051883229	492	6.62293509055445E-4	492	0.00113398485404037	492	-0.00119809989178332	492	0.00463420851964447	492	5.97935188066501E-4	492	0.00120000683869481	492	3.50485150803159E-4	492	0.00179624414050572	492	-9.87496666921217E-4	492	0.00132824058635084	492	0.00147049798159493
493	-0.00147997444351766	493	0.0324918070087463	493	0.00226693214745932	493	-9.57784141286666E-4	493	0.00151111269921866	493	0.00425903746931056	493	0.0020670577575963	493	-0.00364737606321608	493	0.00199083228554642	493	0.00163295694064924	493	-0.00236117048057771	493	0.00332390833368024	493	0.00198192122414298	493	6.16886269016348E-4	493	2.53358334150633E-4	493	0.00153142719436516	493	-2.43878854156776E-4	493	5.37704623965851E-4	493	0.00188065174270236
494	-6.07562968761854E-4	494	0.028629727951226	494	0.00155952942897031	494	2.64005712200976E-4	494	0.00121617064806223	494	0.0036505412399821	494	-0.00100206065479203	494	-0.00293109160759997	494	0.00168937106203781	494	0.00182192902725919	494	-0.00328424106937142	494	0.00170360814771531	494	0.00176590726021786	494	3.53765699337316E-4	494	-7.03768482503975E-4	494	0.00123661024822397	494	-1.80261041391461E-4	494	0.00138716866158095	494	0.00249080550381109
495	-5.35151494005959E-4	495	0.0251676488937065	495	5.02126710481221E-4	495	0.00121579556568996	495	-6.88771403096311E-4	495	0.00212204501065383	495	-0.00284117906717984	495	-0.00221480715198386	495	0.00120790983852803	495	0.00112090111386909	495	-0.00304731165816641	495	6.83307961751645E-4	495	3.89893296294019E-4	495	7.50645129659056E-4	495	-0.0012308952991571	495	7.31793302082728E-4	495	0.0011133567713717	495	0.00177663269919481	495	0.00245095926491867
496	3.27259980749339E-4	496	0.0220655698361867	496	-0.00154527600800769	496	0.00215758541917843	496	-0.00190371345425255	496	0.00145463041286842	496	-0.00175102384801651	496	-0.00242677688046822	496	5.66448615019866E-4	496	2.31028961950486E-4	496	-0.0026582841472278	496	5.91613809940661E-4	496	-6.13243538705177E-4	496	0.00103752455997963	496	-0.00133802211580925	496	2.26976355941488E-4	496	0.00182752189745816	496	0.00145789512740713	496	0.00301363401139909
497	2.99671455505468E-4	497	0.0196634907786661	497	-0.00222736708246352	497	0.00393937527266797	497	-8.03239318291737E-4	497	-2.60375134581103E-4	497	-0.00153102653503812	497	-0.00242836708375549	497	-8.14837114995193E-4	497	-0.00126859193747464	497	-0.00178880052765162	497	0.0013796166220752	497	-5.07928823937576E-4	497	8.85240098239315E-4	497	-0.00270512164314507	497	3.67293335298946E-4	497	0.0026018060047015	497	7.19548510097923E-4	497	0.00304468288513426
498	0.00124185143573996	498	0.0183001694860367	498	-0.00178519141320255	498	0.00440116512615685	498	-4.24433994323792E-5	498	-0.00233538068203121	498	2.8970777941062E-5	498	-0.00327995728704344	498	-8.55284376092058E-4	498	-0.00197821283689859	498	0.00121068309192296	498	0.00334761943420947	498	-3.82614109169843E-4	498	0.00206695037442017	498	-0.00314209078818095	498	7.05472403154772E-4	498	0.00235609011194526	498	0.00161120189278918	498	0.00213573175886861
499	0.00153333693240842	499	0.0172307712563109	499	-3.63015743942263E-4	499	0.00502295497964589	499	5.28352519427067E-4	499	-0.00223038622948124	499	0.0017989680909194	499	-0.00340154749033239	499	-0.00118573163718949	499	-0.00244783373632362	499	0.00227016671149816	499	0.00420562224634491	499	0.00280270060559928	499	0.00223866065060019	499	-0.0028890599332172	499	0.00188365147101166	499	0.00158037421918866	499	0.00193285527547982	499	0.00178678063260307
500	7.24822429076788E-4	500	0.0163413730265836	500	4.49159925318021E-4	500	0.00549474483313439	500	0.00271914843828647	500	-8.4539177693177E-4	500	0.00180896540389774	500	-0.00320313769362013	500	-0.00161617889828758	500	-0.00306745463574831	500	0.00239965033107392	500	0.00357362505847991	500	0.00615801532036642	500	0.00155037092678167	500	-0.00258602907825267	500	0.00124183053886728	500	3.84658326431975E-4	500	0.00237450865816946	500	0.00211782950633843
501	-5.93692074254193E-4	501	0.0146419747968576	501	0.00128133559457844	501	0.00532653468662225	501	0.00402994435714543	501	-2.20397324381061E-4	501	-1.01037283123162E-4	501	-0.00157472789690871	501	-7.86626159385406E-4	501	-0.00285707553517334	501	9.79133950649747E-4	501	0.0013416278706142	501	0.00705333003513431	501	3.82081202962681E-4	501	-0.0018929982232887	501	7.70009606723576E-4	501	5.98942433675198E-4	501	0.00240616204086042	501	0.00197887838007293
502	-0.00124220657758567	502	0.0112625765671313	502	0.00196351126384009	502	0.0033883245401114	502	0.00341074027600463	502	0.00174005948731093	502	-0.00113134920526026	502	-1.0530458763558E-4	502	3.62926579517087E-4	502	-0.00204603795822145	502	-7.20952190135904E-4	502	-0.00217070445034828	502	0.00671864474990169	502	2.13791479143133E-4	502	-7.89967368325151E-4	502	1.78188674579083E-4	502	3.43414289527111E-4	502	0.00218840183761326	502	0.00139252865020012
503	-0.00224072108091722	503	0.00628317833740333	503	0.00265568693310048	503	0.00111011439360009	503	0.00269153619486318	503	0.00359417219686353	503	-0.00185243421518866	503	0.00123665250304406	503	2.82479318419959E-4	503	-2.33354190329216E-4	503	-0.00333996273182535	503	-0.00280387460405507	503	0.00617395946466903	503	-0.00104449824467601	503	-2.06936513360567E-4	503	1.66367742434836E-4	503	8.88355516898365E-4	503	0.00213210766952177	503	0.00168268241130853
504	-0.00249923558424836	504	3.78010767843051E-6	504	0.00119381916327121	504	0.00117190424708902	504	0.00127072091401903	504	0.00444828490641402	504	-0.00129351922511756	504	0.00321860959372167	504	5.13128124223883E-4	504	5.89329577562303E-4	504	-0.00494897327351396	504	-0.00133704475776231	504	0.00330927417943805	504	-0.001869949856526	504	-3.81121374548599E-6	504	-6.18380909527261E-4	504	0.00110329674427057	504	0.00102581350143005	504	0.00178283617241704
505	-0.00210701782609757	505	-0.00696828734828792	505	8.44424244011321E-4	505	0.0017536941005778	505	-0.00149860136664071	505	0.00387239761596536	505	-8.44604235045843E-4	505	0.00518056668440003	505	0.00142446197184132	505	2.42013345454595E-4	505	-0.00539798381520296	505	1.09785088531211E-4	505	-0.00109541110579503	505	-0.00148362764839582	505	3.39373113776631E-4	505	-1.61209386376981E-4	505	0.00147823797164293	505	4.19519333337171E-4	505	7.32989933524664E-4
506	-0.00120406780646487	506	-0.0145203548042536	506	0.00131502932475058	506	0.00210548395406729	506	-0.00329792364729986	506	0.00332651032551645	506	-8.55689244974478E-4	506	0.00438252377507808	506	6.65795819458026E-4	506	8.46971133467989E-5	506	-0.00497699435689292	506	0.00202661493482381	506	-0.00535009639102757	506	-6.17305440264282E-4	506	4.72557441298704E-4	506	-2.54037863227197E-4	506	0.00208317919901457	506	6.93225165245615E-4	506	-1.36856305366528E-4
507	-3.81117786831808E-4	507	-0.0221124222602205	507	0.00214563440549131	507	0.00435727380755502	507	-0.0034372459279588	507	0.00215062303506741	507	-0.00160677425490263	507	0.00223448086575662	507	4.97129667074603E-4	507	6.37380881238769E-4	507	-0.00383600489858171	507	0.00447344478111678	507	-0.00557478167625902	507	2.0901676786611E-4	507	3.65741768820982E-4	507	4.83133659923141E-4	507	0.00148812042638635	507	6.6693099715387E-4	507	4.03297455741303E-4
508	-7.81677671986003E-5	508	-0.0274244897161857	508	0.00148623948623072	508	0.00683906366104381	508	-0.00121656820861826	508	6.34735744618808E-4	508	-0.00126785926483119	508	1.64379564342454E-5	508	0.00116846351469135	508	-3.599353508692E-4	508	-0.00292501544027068	508	0.00466027462741003	508	-0.00448946696149122	508	4.25338975996503E-4	508	-7.10739036566821E-5	508	5.20305183073333E-4	508	9.93061653757898E-4	508	0.00140063682906177	508	2.93451216849761E-4
509	-9.52177475666005E-5	509	-0.0326765571721515	509	0.00145684456697026	509	0.00710085351453316	509	9.8410951072303E-4	509	-0.0010189345699354	509	-0.00221989732788419	509	-0.00116800512102344	509	0.00107979736230845	509	-8.04211173375258E-4	509	-0.00292289147998215	509	0.0016463821804642	509	-0.00213869762947816	509	7.31661184127042E-4	509	-4.77889576133705E-4	509	1.97476706223831E-4	509	0.00127839634474736	509	0.00232567218003688	509	-0.00169322368757197
510	5.17732272067306E-4	510	-0.0383086246281188	510	8.77233322520432E-4	510	0.00572264336802153	510	0.00230478723006389	510	-0.00249853255919064	510	-0.00340225307531306	510	-0.002091248254529	510	8.21271599431128E-4	510	7.92526473986754E-4	510	-0.00312038935236814	510	8.22489691048034E-5	510	4.03889908285215E-4	510	2.58236620975794E-4	510	-3.0469646915332E-4	510	-1.04544798757544E-4	510	0.00186386219027757	510	0.00225115070403259	510	-0.00142217481383788
511	0.0013606822917005	511	-0.0430051804657774	511	-7.65911233364669E-4	511	0.00451443322151057	511	0.00353546494940549	511	-0.00379813054844735	511	-0.00479460882274108	511	-4.64491388034283E-4	511	0.00118503886513999	511	0.00323926412134767	511	-0.00342788722475351	511	-4.61884242255017E-4	511	0.00259647744604852	511	-7.10518731148468E-5	511	-2.61359964353503E-4	511	3.36614236773336E-4	511	5.59328035808271E-4	511	0.00197662922802788	511	-5.31125940103294E-4
512	0.00122448489205063	512	-0.0457261860871077	512	-0.00302905578925028	512	0.00187622307499957	512	0.0033061426687464	512	-0.00340772853770321	512	-0.00439696457016936	512	0.00169226547845991	512	6.88806130849429E-4	512	0.00403600176870889	512	-0.00402538509714034	512	-9.06017453614183E-4	512	0.00154906498381013	512	8.9659632793726E-5	512	-2.80234595537721E-5	512	-5.42226727696438E-4	512	0.00113479388133797	512	0.00240210775202332	512	-6.4007706636815E-4
513	0.00104857168597494	513	-0.048327191708438	513	-0.0048122003451363	513	-4.21987071511865E-4	513	5.06820388086915E-4	513	-0.00204732652695938	513	-0.00473932031759894	513	0.00209902234495551	513	-3.47426603441114E-4	513	0.00546273941607023	513	-0.00338288296952616	513	-0.00213015066497402	513	-1.88347478426998E-4	513	8.50371138702677E-4	513	-2.34686954752483E-4	513	-0.00119106769216515	513	4.20259726867656E-4	513	0.00155758627601976	513	-0.00113902819263334
514	0.00128265847989795	514	-0.0485681973297689	514	-0.00445534490102162	514	-0.00215019721802356	514	-9.7250189257192E-4	514	-4.46924516215752E-4	514	-0.00556167606502722	514	0.00171577921144994	514	-2.53659337731804E-4	514	0.00707947706343148	514	-0.00239038084191279	514	-0.00284428387633273	514	-0.00195575994066299	514	0.00119108264461154	514	-3.21350449952185E-4	514	-0.00132990865663452	514	-8.42744276026153E-5	514	0.00150306480001472	514	4.82020681101147E-4
515	4.16745273821739E-4	515	-0.0463492029510988	515	-0.00357848945690709	515	-0.00241840736453458	515	-0.00127182417323102	515	5.16239389166451E-4	515	-0.00680431514806834	515	0.00117352601052545	515	-0.00112989207202219	515	0.00779723334691429	515	-0.00141709258715661	515	-0.00197862154300132	515	-0.00170671889589347	515	0.00267179415052166	515	-2.38013945151216E-4	515	-1.8874962110349E-4	515	-3.28760302744868E-4	515	0.00142883506314551	515	3.5111850754177E-4
516	-6.69167932254133E-4	516	-0.0417902085724293	516	-0.00150163401279269	516	-0.00115661751104579	516	-0.00165114645389064	516	-2.10469758446408E-4	516	-0.00553799312835679	516	-9.25097437606937E-4	516	-6.36124806312921E-4	516	0.00597872462950821	516	6.29078133784766E-4	516	-0.00277370887913619	516	-8.67348325428452E-4	516	0.00373250565642991	516	-1.54677440351136E-4	516	-2.67590585572464E-4	516	-6.13069153689416E-4	516	-4.32496356861378E-6	516	3.13062493903615E-4
517	-9.50811383315653E-5	517	-0.0366210379898355	517	9.23274252962791E-4	517	4.75172342443209E-4	517	-0.00270327746888199	517	-0.00147717890605836	517	-0.00397167110864505	517	-0.00260372088573924	517	1.90350893110036E-5	517	0.00404021591210224	517	0.00221524885472757	517	-0.0026187962152715	517	0.00245202224503593	517	0.00297525181002634	517	-6.91257477262397E-4	517	3.4738484415886E-4	517	-6.07378004634285E-4	517	-0.00177748499028407	517	6.05006480263626E-4
518	1.99005655592721E-4	518	-0.031012434617038	518	0.00290623534035905	518	8.0696219593257E-4	518	-0.00233821721820604	518	-0.00149388805367057	518	-0.00301534908893331	518	-0.00300234433387292	518	6.35587614849165E-4	518	0.00309170719469609	518	0.00259141957566911	518	-3.73883551406884E-4	518	0.00358139281550063	518	0.00285003261130967	518	-8.47754055885552E-4	518	0.00119617666809191	518	1.88313144422025E-4	518	-0.00290064501699838	518	6.76950466625748E-4
519	2.03843389587455E-4	519	-0.0273238312442388	519	0.0032891964277546	519	4.08752049421146E-4	519	-0.00220315696753115	519	-0.0030605972012836	519	-0.00225902706922199	519	-0.003020967782005	519	7.92140140386088E-4	519	0.00105319847729035	519	0.00383759029661057	519	0.0028910291124582	519	0.00391076338596541	519	0.00315481341259272	519	-1.74250634509043E-4	519	7.34968492024812E-4	519	0.00111400429347785	519	-0.0026238050437124	519	2.28894452987127E-4
520	-6.71318876417359E-4	520	-0.0229352278714403	520	0.00244215751515053	520	8.20541902909255E-4	520	-5.78096716855825E-4	520	-0.00360730634889528	520	6.57294950488385E-4	520	-0.00196959123013762	520	0.00111869266592457	520	-0.00153531024011677	520	0.00399376101755244	520	0.00278594177632208	520	0.00273013395643051	520	0.00240959421387554	520	-4.30747213131966E-4	520	-7.62396840423563E-5	520	7.19695442533919E-4	520	-0.00196696507042571	520	2.90838439347851E-4
521	-6.36481142422873E-4	521	-0.0207066244986427	521	0.00101511860254622	521	1.23317563982539E-5	521	2.96963533819472E-4	521	-0.0028440154965077	521	0.00124361697019992	521	-4.38214678270654E-4	521	4.65245191462849E-4	521	-0.00297381895752302	521	0.00343993173849366	521	0.00434085444018706	521	0.00267950452689458	521	0.00110437501515825	521	-8.57243791755558E-4	521	-1.57447860108739E-4	521	0.00187538659158992	521	5.69874902859979E-4	521	3.72782425709595E-4
522	-0.00172164340842773	522	-0.0184180211258438	522	2.48079689941783E-4	522	-8.05878390113257E-4	522	0.00130202378449429	522	-0.00234221507020926	522	-1.30821009195259E-4	522	-2.35627900293522E-5	522	-1.2820228299848E-4	522	-0.0041905812356493	522	0.00318031746914205	522	0.00377524018756681	522	-3.96019997764618E-4	522	4.19155816442363E-4	522	-1.23740370378655E-4	522	-0.00134865603617662	522	0.00186373783839588	522	0.00302732741273637	522	1.90904728501806E-4
523	-0.00204680567443294	523	-0.0162894177530459	523	-2.18959222662463E-4	523	9.45911463375637E-4	523	7.47084035170431E-4	523	-2.76383793111457E-4	523	-4.45618988167418E-4	523	6.12640573336876E-4	523	-3.41649757461759E-4	523	-0.00503651625306567	523	0.004662699783335	523	0.00109937634292745	523	-0.00137912640958593	523	1.73936617725801E-4	523	0.00104976305099846	523	-0.00310986421224335	523	0.00147229649992653	523	0.00449507007152405	523	5.61953602237431E-4
524	-0.00183196794043727	524	-0.0141107799787727	524	7.38683534583728E-4	524	0.00125770131686487	524	9.47437669780449E-4	524	0.00246944748398725	524	4.89583032860175E-4	524	0.00131884393670223	524	-6.22201963544455E-4	524	-0.00351245127048205	524	0.00480508209752895	524	-2.26487501712391E-4	524	-0.00318223282140817	524	-3.48114564249435E-4	524	0.0011634604857198	524	-0.00237941105474171	524	5.10855161455659E-4	524	0.00396281273031196	524	0.0010730024759722
525	-1.27029723660854E-4	525	-0.0136473721089097	525	9.27021087942848E-4	525	1.69491170353808E-4	525	2.18115389121643E-4	525	0.00367527876108564	525	-1.05214946113819E-4	525	-6.94952699932472E-4	525	-9.72576908298883E-4	525	-0.00148838628789782	525	0.00421746441172211	525	-0.00186235134635293	525	-0.00359533923323063	525	-0.0014099717860141	525	0.00138716979880904	525	-0.00176885618293987	525	6.09413822986404E-4	525	0.00270055538909997	525	0.00178405134970649
526	1.08209941465987E-4	526	-0.0124839642390473	526	0.00148535864130306	526	-0.00172871897615767	526	-3.01206891538008E-4	526	0.00374111003818367	526	2.69987074913658E-4	526	-0.00150874933656642	526	-4.42951853053764E-4	526	0.0013856786946862	526	0.00317984672591454	526	-0.00298821519099324	526	-0.0027784456450517	526	-0.00232182900778	526	0.00106087911189867	526	-0.00146830131113784	526	-4.42027515484611E-4	526	9.78298047887627E-4	526	0.0019551002234417
527	9.73449606592069E-4	527	-0.0112105563691847	527	0.00134369619466224	527	-0.00304692912266891	527	2.49470827803577E-4	527	0.00328694131528096	527	0.00265518909594142	527	-2.42545973200947E-4	527	-3.33326797806954E-4	527	0.00335974367727054	527	0.00195222904010794	527	-0.00317407903563272	527	-5.41552056874117E-4	527	-0.00223368622954467	527	8.34588424988958E-4	527	-5.67746439336325E-4	527	-0.00107346885395465	527	-0.00222395929332464	527	0.00161614909717578
528	8.8868927171859E-4	528	-0.0113271484993227	528	0.00125203374802307	528	-0.00423513926918062	528	9.50148547144813E-4	528	5.54722312882561E-4	528	0.00233026843183293	528	5.24521902574904E-4	528	-1.73701742562038E-4	528	0.00270389690263517	528	-7.24403755090641E-4	528	-0.00303004641658244	528	4.24823070629188E-4	528	-0.0027955434513105	528	4.9829773807808E-4	528	-4.71915675346324E-5	528	-0.00127397561500597	528	-0.00457615765956554	528	3.57197970910939E-4
529	3.3392893684514E-4	529	-0.00995374062945942	529	4.40371301382747E-4	529	-0.00317334941569136	529	0.00129082626648547	529	-0.00232579836649904	529	0.00142461165691632	529	1.76776852805816E-4	529	3.55923312684858E-4	529	1.28579584685262E-4	529	-0.0029951272066322	529	-0.00397663501539114	529	0.00196808743408372	529	-0.00314740067307628	529	-8.79929488331044E-5	529	-0.00137663669573307	529	1.11250884549108E-5	529	-0.00592800217597755	529	6.78246844645791E-4
530	-7.10831398028411E-4	530	-0.0087483173203875	530	0.0017674102139873	530	-0.00214840181354425	530	8.67430764282418E-4	530	-0.00362631904588007	530	4.68954881998052E-4	530	0.00187903180303728	530	7.6684927746129E-4	530	-8.46737733263936E-4	530	-0.00323585065817511	530	-0.00247322361420022	530	0.00305135179753968	530	-0.00342823761663968	530	-8.54198106576831E-4	530	-0.00260685174899677	530	4.76225791915752E-4	530	-0.00656984669239158	530	3.89295718379756E-4
531	-4.25591732902575E-4	531	-0.00781312181745175	531	0.00158037130138222	531	-8.84018135440812E-5	531	7.55181076108613E-5	531	-0.00331683972526164	531	-7.36701892918745E-4	531	0.00307128675326851	531	9.69856697486726E-4	531	-0.00256205505121443	531	-0.00213657410971635	531	-0.00424981221300857	531	0.00250461616099518	531	-0.00326744211508245	531	-7.30266417655834E-4	531	-0.00340829868236447	531	4.91326495376754E-4	531	-0.00589169120880495	531	-4.39655407885375E-4
532	-9.20268298398419E-4	532	-0.00768792631451642	532	4.1333238877872E-4	532	8.31598186455729E-4	532	3.53605450938765E-4	532	-0.00293736040464232	532	-0.00248235866783642	532	0.0018635417035	532	6.82864117512949E-4	532	-0.0034673723691645	532	-5.27297561259132E-4	532	-0.00565640081181673	532	0.00178788052445	532	-0.00305664661352445	532	-8.56334728734254E-4	532	-0.00313974561573271	532	-2.93572801162156E-4	532	-0.00390353572521729	532	-2.1860653415029E-4
533	-8.64861094516556E-4	533	-0.00662273081158116	533	-5.53706523826136E-4	533	-1.68401813544605E-4	533	0.00139169279426632	533	-0.0023878810840241	533	-0.00251801544275398	533	0.00178579665373224	533	-2.4128462460915E-5	533	-0.00208268968711334	533	1.21978987198013E-4	533	-0.0054929894106257	533	0.00212114488790593	533	-0.00240585111196623	533	-1.22403039812369E-4	533	-0.00245119254910087	533	2.6152790229883E-4	533	-0.00218538024163006	533	0.00176244233958478
534	-0.00114945389063426	534	-0.00676753530864538	534	-6.10745436429916E-4	534	-0.00149840181354488	534	4.79780137594865E-4	534	-7.48401763405404E-4	534	-0.00114367221767075	534	6.88051603963125E-4	534	-3.51121042434954E-4	534	-1.58007005063965E-4	534	0.00109125553565637	534	-0.00334957800943414	534	0.00197440925136139	534	-0.00208505561040884	534	0.00161152864910896	534	-6.42639482468788E-4	534	-7.53371394240254E-4	534	-0.00122722475804249	534	0.0027934912133194
535	-9.94046686751737E-4	535	-0.00666233980570929	535	-0.00149778434903425	535	-9.68401813544517E-4	535	-4.22132519076968E-4	535	5.80188064764897E-4	535	0.0011902903086618	535	-0.00107565239705032	535	-7.28113622408877E-4	535	0.00100613686278184	535	0.00123479488402722	535	-0.00225615085142739	535	-7.1494517845494E-5	535	-8.34260108851126E-4	535	0.00332546033803105	535	-1.140864158371E-4	535	-6.09601243096058E-4	535	-9.09016004063012E-4	535	0.00389006805438719
536	-0.00159863948286976	536	-0.00640698529958783	536	-0.00101482326163893	536	-2.2840181354411E-4	536	6.59548242500918E-5	536	0.0011046729272346	536	0.00256400650051081	536	-0.00214674160181172	536	-0.00131510620238195	536	0.00255993208613958	536	1.81092514695003E-4	536	-5.82713497832899E-4	536	1.631399800468E-4	536	3.36535392706949E-4	536	0.0046993920269518	536	7.24466650794398E-4	536	-0.00114080968462726	536	-0.00208077278100571	536	0.00520022181549606
537	-0.00150323227898763	537	-0.00537938754812028	537	5.73221601659846E-4	537	-8.51909731593992E-5	537	-3.21312617947989E-4	537	0.00183915778970345	537	0.00337772269235881	537	-0.00157783080657303	537	-9.99049438699551E-4	537	0.00384372730949956	537	-4.32609854637001E-4	537	2.90723855760788E-4	537	9.07774477940215E-4	537	1.3931878577278E-4	537	0.00477348385802223	537	4.68006524630304E-4	537	-0.00121201812615812	537	-0.00170252955794759	537	0.00619037557660373
538	-6.9782507510574E-4	538	-0.00477178979665194	538	0.00258581888317089	538	-7.73401119670503E-4	538	-0.00134760780595489	538	0.002883642652173	538	0.00429143888420747	538	-8.88920011334449E-4	538	-1.9235444029686E-4	538	0.00334752253285853	538	8.63687776032407E-4	538	4.84161209355349E-4	538	7.24089758330493E-5	538	1.25182491546028E-5	538	0.00312760920721544	538	5.51482883466292E-5	538	-0.00116322656768997	538	-6.84286334890594E-4	538	0.00569052933771186
539	-0.00177236415768522	539	-0.00473419204518422	539	0.0029884161646816	539	-6.41611266181563E-4	539	-0.00242390299396078	539	0.00201812751464292	539	0.00425515507605656	539	9.59990783903741E-4	539	1.3434055810535E-4	539	0.00187131775621729	539	0.00248998540669998	539	-0.00163240143704968	539	-5.82956526273826E-4	539	-4.34282287464782E-4	539	0.00124173455640886	539	-5.5770994793658E-4	539	-0.00223443500922116	539	6.39568881668495E-5	539	0.00349068309882039
540	-0.00153688533575203	540	-0.00489659429371692	540	0.00304101344619223	540	-0.00145982141269396	540	-0.00261019818196839	540	-1.47387622887685E-4	540	0.00368887126790529	540	0.00291890157914221	540	3.81035556507925E-4	540	2.95112979576295E-4	540	0.00446628303736851	540	-0.00305896408345685	540	-6.83220283805852E-5	540	-0.00163108282408331	540	-5.74140094396824E-4	540	-5.50568184221056E-4	540	-0.00315564345075181	540	2.42200111224555E-4	540	0.00173083685992825
541	-0.00114140651381955	541	-0.00491899654224781	541	0.00276361072770293	541	-0.00305803155920437	541	-0.0026564933699742	541	-0.00105200048553034	541	0.00474255407881596	541	0.00336827931691097	541	8.27730554910033E-4	541	-7.11279968668599E-4	541	0.00482307468382448	541	-0.0040254134612967	541	-0.00114624302624033	541	-0.0021378833607022	541	-0.00223001474520412	541	-8.03426420504572E-4	541	-0.00190175118882241	541	0.0010804406939231	541	6.40340271938378E-4
542	-0.00166592769188778	542	-0.00566139879077987	542	0.00283620800921369	542	-0.00115624170571582	542	-0.00292278855798145	542	-1.84883774622335E-4	542	0.00403580293754047	542	0.00271372730756703	542	0.00138442555331242	542	-0.00211011914777437	542	0.00408628853551996	542	-0.00392039034778779	542	-8.97385468874745E-4	542	-0.00194468389732094	542	-0.00308588939600973	542	-1.36284656787389E-4	542	-0.00124154978190116	542	5.18646951944923E-4	542	-8.58610854327146E-4
543	-0.00247044886995518	543	-0.00499143319225581	543	0.0029632159841908	543	0.00207649408462274	543	-0.00165991842205671	543	-8.9776706371314E-4	543	0.00338905179626359	543	0.00197917529822167	543	9.12204530176375E-4	543	-0.00324895832687933	543	0.00220950238721507	543	-0.005035367234278	543	1.91472088488354E-4	543	-0.00256587629584448	543	-0.00287174927737066	543	5.48569398589827E-4	543	-0.00124134837497891	543	-7.5314679003391E-4	543	-0.0012775619805927
544	-0.0014549700480222	544	-0.00377623768932001	544	0.00300791012714896	544	0.00332322598926815	544	1.12114735967062E-4	544	3.59349647196083E-4	544	0.00225230065498838	544	8.44623288877244E-4	544	8.12925734297032E-4	544	-0.00363779750598425	544	6.82716238909364E-4	544	-0.0040203441207689	544	0.00106032964585356	544	-0.0017732751766788	544	-0.00225756907023644	544	9.37213959908867E-4	544	3.98853031942537E-4	544	-0.00216494053201188	544	-9.16513106857586E-4
545	-0.00141949122608942	545	-0.00295104218638453	545	0.00296260427010697	545	0.00330995789391419	545	0.00262414789398946	545	0.0036864663581051	545	-2.6445048628787E-4	545	-2.99287204663656E-5	545	0.00246364693841628	545	-0.0047766366850901	545	-8.34069909394053E-4	545	-0.00156532100726015	545	0.00231918720321733	545	-8.60674057513222E-4	545	-0.00189338886310164	545	0.00139585852122703	545	6.19054438865341E-4	545	-0.00129673427399091	545	-0.00125546423312173
546	-7.13731305399534E-4	546	-0.0021458466834483	546	0.00298729841306411	546	0.00397668979856025	546	0.0024861810520127	546	0.0059635830690139	546	-0.00213120162756297	546	-2.2448072981085E-4	546	0.00362436814253631	546	-0.00470547586419467	546	-0.0015908560576996	546	0.00297970210625031	546	0.00333804476058219	546	-9.80729383481815E-5	546	-0.00207920865596734	546	0.0019045030825442	546	1.29255845786602E-4	546	-0.0011385280159697	546	-0.0015044153593875
547	0.00101202861528993	547	-0.00213065118051325	547	0.00266199255602295	547	0.00164342170320619	547	0.00268821421003551	547	0.00658069977992248	547	-0.00133795276884019	547	3.50967260843937E-4	547	0.00293508934665621	547	-0.00334431504330013	547	-0.00169764220600399	547	0.00554472521975935	547	0.00130690231794528	547	-3.9547181918298E-4	547	-0.0017550284488328	547	0.00229314764386235	547	6.69457252708838E-4	547	3.19678242052923E-4	547	-0.0019433664856523
548	0.00132778853597948	548	-0.00357545567757711	548	0.00194668669898057	548	-0.00111984639214757	548	0.002520247368059	548	0.00767059711337925	548	-8.5496106512295E-4	548	7.89137157378939E-4	548	0.00234581055077587	548	-0.00157520990223414	548	-0.00173138876458179	548	0.00679175085215089	548	3.04463717488268E-4	548	1.8712929998177E-4	548	-9.30848241698534E-4	548	0.00232179220517992	548	6.32283282775425E-4	548	9.67824101651082E-4	548	-0.00205403095661705
549	0.00134354845666884	549	-0.00459026017464126	549	0.00221138084193839	549	-0.00217311448750213	549	0.00261228052608153	549	0.0088929043197119	549	4.47807770920683E-4	549	0.00117966603900754	549	0.00163653175489564	549	0.00105211364964397	549	-0.00179250101206208	549	0.00587051200090638	549	3.79568446921219E-4	549	-7.70269580852023E-4	549	-0.00161666803456395	549	0.00263043676649843	549	-7.32616013761955E-4	549	0.00159591761595212	549	-0.00262551365965358
550	0.00100930837735902	550	-0.00443506467170618	550	0.0041500263007217	550	-0.00126791990785957	550	0.0012882368544167	550	0.0086852115260454	550	0.00330057660696514	550	0.00176019492063606	550	5.19968198908316E-4	550	0.00306943720152297	550	-7.93613259543413E-4	550	0.00348927314966208	550	4.54673176351506E-4	550	-6.48938290112255E-4	550	-0.0027327341430734	550	0.00322338583782944	550	1.82484689698725E-4	550	0.00170401113025243	550	-0.00197699636269011
551	5.25068298047771E-4	551	-0.00342986916877042	551	0.00654973310375873	551	-0.00126334856808619	551	9.16324197745233E-4	551	0.00787751873237763	551	0.00272334544300801	551	0.00333072380226529	551	-4.0549458415029E-4	551	0.0025367607534017	551	0.00109527449297619	551	0.0023480342984179	551	4.49777905783932E-4	551	-0.00111974341630194	551	-0.00151457578495151	551	0.00257807998078796	551	0.00170758539315941	551	0.00279210464455204	551	-0.0021584790657263
552	-4.89983698193086E-5	552	-0.00225467366583576	552	0.00707943990679549	552	9.21222771689045E-4	552	-0.00185558845892775	552	0.00207982593871048	552	5.86114279051309E-4	552	0.00471125268389461	552	8.59042632790796E-4	552	6.24084305281158E-4	552	0.00246416224549595	552	0.00214679544717367	552	0.00254488263521502	552	4.94514575093419E-5	552	-9.56417426828615E-4	552	0.00291277412374491	552	0.00340268609661987	552	0.00204019815885381	552	-0.0012499617687638
553	-0.00146254480335717	553	-8.49478162900041E-4	553	2.59146709832514E-4	553	8.75794111463435E-4	553	-0.0103375011155995	553	-0.0116678668549577	553	-0.00732111688490367	553	-3.78218434476274E-4	553	0.00304357984973258	553	-0.00693859214284043	553	-0.0041669500019843	553	-0.00300444340407058	553	-0.0020100126353535	553	5.08646331319973E-4	553	-9.48259068707102E-4	553	0.00286746826670381	553	0.00432778680008106	553	0.00174829167315327	553	-0.00434144447179996
554	-0.0066360912368939	554	-3.44282659964001E-4	554	-0.0142511464871307	554	-0.00409963454876205	554	-0.0271494137722721	554	-0.0388055596486252	554	-0.0248383480488608	554	-0.0164076895528478	554	0.00267811706667498	554	-0.0246812685909612	554	-0.0221480622494648	554	-0.0199656822553154	554	-0.0181349079059219	554	0.00297784120513001	554	-7.20100710585037E-4	554	0.00409216240966082	554	0.00899288750354188	554	-5.33614812546546E-4	554	-0.00843292717483646
555	-0.0132696376704313	555	3.00912842971179E-4	555	-0.0363514396840934	555	-0.0163650632089878	555	-0.0556813264289433	555	-0.0776724412711527	555	-0.0528160980433556	555	-0.0440641173619021	555	-0.00324734571638441	555	-0.0550075897504074	555	-0.0512648486247418	555	-0.0497909807431585	555	-0.0474198031764903	555	0.00349703607894103	555	0.00227805764753786	555	0.00334685655261957	555	0.0170230889104639	555	-0.00660568054356325	555	-0.0154544098778731
556	-0.0216231841039694	556	-3.23186838397049E-4	556	-0.0674075830259389	556	-0.0333914225740806	556	-0.0938344740229482	556	-0.125719322893681	556	-0.0891838480378508	556	-0.0835305451709569	556	-0.0122823185524661	556	-0.0983339109098536	556	-0.0901316350000183	556	-0.0908962792310026	556	-0.0897246984470579	556	0.00127623095275187	556	-5.36178891446859E-4	556	-0.00329938000929086	556	0.0254232903173852	556	-0.0193477462745806	556	-0.0263858925809091
557	-0.0306967305375068	557	-3.38382341332988E-4	557	-0.102255902164638	557	-0.0555329008159458	557	-0.137369413772272	557	-0.174676204516209	557	-0.133911598032346	557	-0.132846972980012	557	-0.0228445966801747	557	-0.1509802320693	557	-0.134698421375295	557	-0.140041577718846	557	-0.143569593717627	557	-0.00525457417343844	557	-0.00687858736451741	557	-0.0178507354479729	557	0.0284434917243068	557	-0.0374798120055964	557	-0.0425173752839463
558	-0.0371502769710439	558	-0.00129357784426798	558	-0.133284221303337	558	-0.0803843790578114	558	-0.182864353521596	558	-0.218823086138737	558	-0.178029348026842	558	-0.181773400789066	558	-0.0370368748078835	558	-0.206156553228745	558	-0.175315207750572	558	-0.190816876206689	558	-0.201004488988195	558	-0.0150853792996282	558	-0.0160409958375887	558	-0.036602090886654	558	0.0253136931312294	558	-0.0613618777366129	558	-0.0593688579869829
559	-0.0386832628779619	559	-0.00103877334720437	559	-0.156592540442036	559	-0.102195857299677	559	-0.221479293270921	559	-0.247779967761265	559	-0.211367098021337	559	-0.21783982859812	559	-0.0519991529355925	559	-0.252002874388192	559	-0.206671994125849	559	-0.236752174694534	559	-0.252959384258764	559	-0.0290361844258173	559	-0.025813404310659	559	-0.0638634463253354	559	0.00852389453815139	559	-0.0878139434676308	559	-0.0777003406900203
560	-0.037185688258262	560	-0.00107396885013955	560	-0.170720859580735	560	-0.115057335541541	560	-0.244404233020246	560	-0.258826849383794	560	-0.229714848015831	560	-0.237216256407176	560	-0.063851431063302	560	-0.278619195547638	560	-0.225858780501126	560	-0.270747473182377	560	-0.292104279529332	560	-0.0450469895520067	560	-0.0377158127837296	560	-0.0973348017640188	560	-0.0266559040549268	560	-0.115516009198647	560	-0.100021823393056
561	-0.0344581136385598	561	-9.69164353075591E-4	561	-0.173319178719434	561	-0.117318813783407	561	-0.25058917276957	561	-0.254318899841592	561	-0.231472855516143	561	-0.237002222595986	561	-0.072643709191011	561	-0.282737055467188	561	-0.230444167578084	561	-0.295549007970004	561	-0.3150535254031	561	-0.0601977946781966	561	-0.0452382212568008	561	-0.127026157202701	561	-0.0748657026480046	561	-0.138558169583131	561	-0.122022487864021
562	-0.0290005390188597	562	-0.00198435985601098	562	-0.169287497858133	562	-0.110460292025272	562	-0.242814112518895	562	-0.238735375878551	562	-0.219281160138552	562	-0.217367656146051	562	-0.0796459873187194	562	-0.266986690879165	562	-0.22356794008006	562	-0.31018620002661	562	-0.322275483511327	562	-0.0720485998043854	562	-0.0472606297298714	562	-0.147527512641382	562	-0.123665501241083	562	-0.154740439183156	562	-0.138441438990287
563	-0.0224229643991585	563	-0.00168955535894622	563	-0.158165816996831	563	-0.0949768757567169	563	-0.22164240114377	563	-0.214821851915509	563	-0.197119464760959	563	-0.185843089696117	563	-0.0828767548304246	563	-0.235826326291142	563	-0.207091712582035	563	-0.313393392083218	563	-0.314647441619554	563	-0.0802480947474171	563	-0.046036669156857	563	-0.159925261598702	563	-0.162285299834162	563	-0.163102708783181	563	-0.147930390116552
564	-0.0142053897794563	564	-0.00169475086188253	564	-0.142654136135532	564	-0.0773301438520706	564	-0.19380295836176	564	-0.190588327952468	564	-0.172277769383367	564	-0.151778523246183	564	-0.0800064990216098	564	-0.19727596170312	564	-0.183905485084011	564	-0.304810584139824	564	-0.295419399727782	564	-0.083856056985729	564	-0.0432112972945573	564	-0.161680567455743	564	-0.180375098427239	564	-0.165954978383206	564	-0.151639341242817
565	-0.00423781515975641	565	-0.00184994636481672	565	-0.126912455274231	565	-0.0616334119474251	565	-0.16650351557975	565	-0.169294803989426	565	-0.149376074005776	565	-0.121633956796248	565	-0.0730062432127951	565	-0.158825597115097	565	-0.157699257585987	565	-0.287877776196431	565	-0.26994135783601	565	-0.080914019224041	565	-0.0396859254322592	565	-0.152135873312786	565	-0.176494897020318	565	-0.16193724798323	565	-0.146928292369083
566	0.00547170441974831	566	-0.00240514186775265	566	-0.110410774412929	566	-0.0517266800427789	566	-0.14188407279774	566	-0.151451280026384	566	-0.131174378628184	566	-0.100109390346313	566	-0.0646659874039806	566	-0.127915232527074	566	-0.132743030087963	566	-0.262924968253038	566	-0.240893315944238	566	-0.0715719814623537	566	-0.0366905535699598	566	-0.137961179169827	566	-0.156194695613396	566	-0.154589517583255	566	-0.137157243495349
567	0.0124218723191865	567	-0.00128033737068822	567	-0.0938590935516288	567	-0.0477099481381336	567	-0.121694630015731	567	-0.136837756063343	567	-0.116792683250591	567	-0.0894348238963794	567	-0.0574157315951656	567	-0.104774867939051	567	-0.110766802589938	567	-0.232662160309644	567	-0.213015274052465	567	-0.0578499437006652	567	-0.0355951817076603	567	-0.12571648502687	567	-0.128314494206474	567	-0.146541787183279	567	-0.128366194621614
568	0.0184620402186244	568	-6.85214867251815E-4	568	-0.0768174126903283	568	-0.0469232162334876	568	-0.105365187233721	568	-0.124024569770844	568	-0.105401536125052	568	-0.0841912368955446	568	-0.0503654757863519	568	-0.0865272740166407	568	-0.0932989947799738	568	-0.200109813617112	568	-0.188432738666505	568	-0.041747905938978	568	-0.034399809845362	568	-0.117031790883911	568	-0.103889700638116	568	-0.137534287526524	568	-0.122266691209603
569	0.0212122081180635	569	-5.98008121655447E-4	569	-0.0614057318290273	569	-0.0480326950304519	569	-0.0936527196608905	569	-0.112140640222233	569	-0.0948104311727471	569	-0.0824977252369479	569	-0.0448251475460868	569	-0.0729598932223556	569	-0.0810410654075513	569	-0.168376733174646	569	-0.167909088396378	569	-0.0275595411375713	569	-0.0325876788303701	569	-0.112207329417171	569	-0.0899407076727252	569	-0.126716805619247	569	-0.118586537448494
570	0.0208623760175017	570	-8.3080137605851E-4	570	-0.046614050967726	570	-0.0489374413676718	570	-0.0834046323175635	570	-0.100696710673621	570	-0.085599326220442	570	-0.0812342135783517	570	-0.0422730085195751	570	-0.0621225124280702	570	-0.0716531360351294	570	-0.140833652732179	570	-0.150625438126251	570	-0.0175630003431975	570	-0.0310865689980542	570	-0.109938684855853	570	-0.085171714707335	570	-0.11674932371197	570	-0.115116383687387
571	0.0202525439169401	571	-2.35946304627532E-5	571	-0.0351323701064254	571	-0.0478221877048908	571	-0.0764265449742361	571	-0.0875627811250101	571	-0.0759582212681371	571	-0.0792007019197554	571	-0.0410008694930628	571	-0.0525751316337839	571	-0.066475206662707	571	-0.119570572289713	571	-0.136181787856125	571	-0.0124064595488234	571	-0.0289454591657394	571	-0.107130040294535	571	-0.0864227217419451	571	-0.107851841804692	571	-0.110716229926278
572	0.0193927118163781	572	6.73612115134503E-4	572	-0.0251406892451245	572	-0.0446969340421104	572	-0.0704884576309075	572	-0.0745588515763984	572	-0.0668771163158324	572	-0.0760471902611588	572	-0.0382487304665506	572	-0.0448477508394989	572	-0.0620472772902847	572	-0.102497491847246	572	-0.121398137585997	572	-0.0129299187544509	572	-0.0261143493334242	572	-0.102811395733217	572	-0.0894237287765547	572	-0.0978943598974151	572	-0.10433607616517
573	0.0173999474197917	573	0.00141081886073025	573	-0.0186890083838236	573	-0.0421916803793296	573	-0.0643203702875796	573	-0.062904922027788	573	-0.0589460113635285	573	-0.0728936786025622	573	-0.0354765914400392	573	-0.0373903700452125	573	-0.0575193479178626	573	-0.0902544114047794	573	-0.10554448731587	573	-0.0168933779600771	573	-0.0239132395011081	573	-0.0972527511718981	573	-0.091894735811163	573	-0.0894068779901387	573	-0.0954659224040624
574	0.0161571830232035	574	0.00129802560632708	574	-0.0162773275225225	574	-0.0377864267165489	574	-0.0548622829442511	574	-0.0535031901945935	574	-0.0524651524272688	574	-0.069471386310334	574	-0.0335744524135269	574	-0.0328740316325113	574	-0.0516812653800667	574	-0.0799564443824554	574	-0.0908039029772052	574	-0.0219668371657038	574	-0.0222421296687934	574	-0.089704106610581	574	-0.0905688395294577	574	-0.081509511235728	574	-0.0858128456024785
575	0.0146444186266175	575	0.00140860582031177	575	-0.0164756466612221	575	-0.0332111730537683	575	-0.0460841956009235	575	-0.0452394002852241	575	-0.0462346736976249	575	-0.066220978493404	575	-0.0303123133870153	575	-0.0304693041731676	575	-0.0453429461321493	575	-0.0711309253730787	575	-0.0788780568962553	575	-0.0265302963713312	575	-0.020611019836478	575	-0.0806454620492625	575	-0.0871486381225353	575	-0.0746323224448391	575	-0.0757034331928894
576	0.0135916542300301	576	0.00121301931150519	576	-0.0202371383235187	576	-0.029075919390988	576	-0.0382988089636847	576	-0.0408956103758555	576	-0.0408341949679825	576	-0.0621305706764721	576	-0.0273795818129692	576	-0.0267245767138249	576	-0.0382446268842314	576	-0.0596354063637019	576	-0.0688322108153052	576	-0.0297002238843795	576	-0.0193262832134913	576	-0.0717739090352332	576	-0.0811684367156129	576	-0.0672551336539504	576	-0.067224020783299
577	0.0124988898334433	577	-1.3256719730137E-4	577	-0.0241504563113022	577	-0.0274306657282066	577	-0.0317363390890231	577	-0.038571820466486	577	-0.0363237162383383	577	-0.0567201628595404	577	-0.0255562102875846	577	-0.0227398492544815	577	-0.0319063076363122	577	-0.0515398873543251	577	-0.0619063647343561	577	-0.0311763371694438	577	-0.0186644296565781	577	-0.0647592148922751	577	-0.0739582353086918	577	-0.0609379448630625	577	-0.0588546083737089
578	0.0107461254368557	578	-0.00196815370610803	578	-0.0292337742990849	578	-0.025955412065426	578	-0.0282838692143601	578	-0.036518030557116	578	-0.0321532375086955	578	-0.0504697550426094	578	-0.0237928387622022	578	-0.0210451217951375	578	-0.0261079883883948	578	-0.0442443683449492	578	-0.0569805186534049	578	-0.0313724504545077	578	-0.0173925760996649	578	-0.0570945207493176	578	-0.0661080339017692	578	-0.0558507560721733	578	-0.0515151959641189
579	0.00893421649192305	579	-0.00280374021491525	579	-0.0358870922868677	579	-0.0253301584026451	579	-0.0269313993396985	579	-0.0330842406477476	579	-0.0294427587790516	579	-0.043269347225678	579	-0.021629467236818	579	-0.0180503943357948	579	-0.0212696691404775	579	-0.0369588493355728	579	-0.0529346725724551	579	-0.0286685637395712	579	-0.0173407225427518	579	-0.0500698266063591	579	-0.0600678324948474	579	-0.0508435672812846	579	-0.0440257835545292
580	0.00767487390195498	580	-0.00338932672372128	580	-0.0397904102746498	580	-0.0266449047398645	580	-0.0251389294650357	580	-0.0306704507383779	580	-0.0280122800494089	580	-0.0374589394087463	580	-0.0210960957114334	580	-0.0150756668764513	580	-0.0205113498925593	580	-0.0314133303261954	580	-0.0478288264915054	580	-0.0257346770246363	580	-0.0164688689858385	580	-0.0449951324634021	580	-0.0542876310879263	580	-0.0460763784903957	580	-0.038826371144939
581	0.00639553131198589	581	-0.00339758805795132	581	-0.0388437282624334	581	-0.0274296510770835	581	-0.0237964595903737	581	-0.0274466608290087	581	-0.0270323687655099	581	-0.0329729483563801	581	-0.0202027241860501	581	-0.0125829304538065	581	-0.0182038210361322	581	-0.0322552930584656	581	-0.0444396697155653	581	-0.0231007903097007	581	-0.0157370154289262	581	-0.0401604383204432	581	-0.0488974296810047	581	-0.0420194791910031	581	-0.0334206090054776
582	0.00561618872201741	582	-0.0027080988102588	582	-0.0357370462502162	582	-0.0264443974143029	582	-0.0233039897157115	582	-0.0242628709196397	582	-0.025402552055902	582	-0.0293876934314401	582	-0.0194193526606661	582	-0.00961052587061229	582	-0.0163264239116216	582	-0.0337051694143424	582	-0.0393416278237924	582	-0.0208669035947642	582	-0.0140751618720127	582	-0.0358057441774857	582	-0.0441772282740818	582	-0.0384026281401937	582	-0.0293404552443688
583	0.00520684613204825	583	-0.00250860956256549	583	-0.0317634425775886	583	-0.0248291437515222	583	-0.0226089294650356	583	-0.0222290810102708	583	-0.0240227353462945	583	-0.0268724385065013	583	-0.0180854441075482	583	-0.00640812128741786	583	-0.0139290267871113	583	-0.0354950457702197	583	-0.0336135859320201	583	-0.0187730168798277	583	-0.0130970717531893	583	-0.031583645014206	583	-0.0409470268671601	583	-0.032235777089384	583	-0.0255903014832608
584	0.00439750354208002	584	-0.00141912031487124	584	-0.0255434287665928	584	-0.0232138900887415	584	-0.0233494866830259	584	-0.0204052911009009	584	-0.0222229186366869	584	-0.0239571835815617	584	-0.0170214908021196	584	-0.0047057167042226	584	-0.0111716296625994	584	-0.0368249221260974	584	-0.0281255440402468	584	-0.0167991301648929	584	-0.0115559619208749	584	-0.0290375954325652	584	-0.0383768254602384	584	-0.0287589260385737	584	-0.0229701477221527
585	0.00379816095211094	585	-3.09631067178628E-4	585	-0.0211734149555971	585	-0.0201286364259605	585	-0.0251500439010162	585	-0.0170115011915319	585	-0.0187931019270797	585	-0.0198719286566229	585	-0.0160475374966893	585	-0.00560331212102838	585	-0.00620423253808866	585	-0.0378647984819755	585	-0.0242775021484736	585	-0.0140752434499563	585	-0.0106748520885596	585	-0.0261015458509251	585	-0.0366266240533166	585	-0.026062074987764	585	-0.0207199939610447
586	0.00321441044047788	586	-1.80141819484447E-4	586	-0.0180934011446015	586	-0.0180433827631807	586	-0.0262506011190062	586	-0.0146277112821629	586	-0.0158732852174719	586	-0.0170066737316832	586	-0.0150135841912604	586	-0.00663090753783369	586	-0.00293683541357748	586	-0.0355346748378524	586	-0.0201594602567017	586	-0.0122313567350201	586	-0.00950374225624451	586	-0.0238954962692866	586	-0.0347264226463953	586	-0.0241352239369546	586	-0.0183998401999359
587	0.00283625200717808	587	-9.20652571791969E-4	587	-0.0161133873336068	587	-0.0172681291004002	587	-0.0246711583369965	587	-0.0126874018553531	587	-0.0143236928063173	587	-0.0150737337167746	587	-0.0135896308858312	587	-0.00845914337450271	587	-8.40156399808834E-4	587	-0.0319291606107566	587	-0.0179064013861723	587	-0.00957747002008436	587	-0.0075026324239289	587	-0.0204194466876464	587	-0.0332277960133602	587	-0.0217884957887851	587	-0.0165026130097692
588	0.00201809357387983	588	-6.08579522320518E-4	588	-0.0138933735226114	588	-0.016652875437619	588	-0.0226117155549872	588	-0.00958888455838913	588	-0.0125245739141198	588	-0.0121956807341554	588	-0.0120456775804021	588	-0.0107387312086624	588	4.55006602392061E-4	588	-0.026162266264051	588	-0.0173827511160445	588	-0.00658358330514908	588	-0.00691152259161409	588	-0.0178033971060065	588	-0.0312324939029782	588	-0.0224620271017448	588	-0.0156415641360343
589	0.00244993514058134	589	-5.98971249399227E-6	589	-0.0113074633971237	589	-0.0151176217748388	589	-0.020735589796816	589	-0.00615036726142559	589	-0.0121754550219215	589	-0.0120776277515349	589	-0.010241749464142	589	-0.00953831904282154	589	5.00169604594092E-4	589	-0.022495371917346	589	-0.0167191008459175	589	-0.00507701250385306	589	-0.00532804444780499	589	-0.0152886120115774	589	-0.0288471917925941	589	-0.0214555584147043	589	-0.0143305152622997
590	0.00268177670728242	590	8.76600097332592E-4	590	-0.0113807859885711	590	-0.0141423681120578	590	-0.0187231199221536	590	-0.00437184996446316	590	-0.0129363361297239	590	-0.0128195747689146	590	-0.00793786509749328	590	-0.00577790687698165	590	-1.24667393206046E-4	590	-0.0188084775706407	590	-0.0155954505757903	590	-0.00411577986835443	590	-0.00432045292087579	590	-0.0126439178686191	590	-0.0262418896822121	590	-0.0194990897276641	590	-0.0130494663885656
591	0.00274361827398373	591	0.0014091899071591	591	-0.0134141085800197	591	-0.013047114449277	591	-0.0151106500474913	591	-0.00358333266749877	591	-0.0132272172375263	591	-0.0122215217862944	591	-0.00695398073084519	591	-0.00362749471114121	591	-0.00188950439100477	591	-0.0158915832239348	591	-0.0136218003056632	591	-0.00301454723285577	591	-0.0036128613939459	591	-0.0102092237256608	591	-0.0242165875718285	591	-0.0173726210406242	591	-0.0122484175148303
592	0.0024854598406856	592	0.00204177971698627	592	-0.0157574311714672	592	-0.0122318607864962	592	-0.013988180172829	592	-0.00293481537053619	592	-0.0130480983453287	592	-0.0111434688036738	592	-0.00586009636419593	592	-0.00173708254530069	592	-0.0023743413888031	592	-0.0122746888772305	592	-0.0122581500355361	592	-0.00170331459735795	592	-0.00381526986701708	592	-0.00839452958270392	592	-0.0220412854614462	592	-0.0168761523535839	592	-0.011607368641096
593	0.00159391328988345	593	0.00156436952681283	593	-0.0148707537629154	593	-0.0111566071237155	593	-0.0112157102981669	593	-0.00219629807357258	593	-0.0125489794531317	593	-0.012435415821054	593	-0.00555621199754786	593	1.93329620540084E-4	593	-0.00234917838660209	593	-0.00995779453052492	593	-0.00949449976540873	593	-0.00223208196185887	593	-0.00167767834008803	593	-0.00747983543974495	593	-0.020735983351063	593	-0.0154596836665428	593	-0.0104163197673612
594	2.74570699915877E-4	594	6.43523896759923E-4	594	-0.0135340763543637	594	-0.0103313534609342	594	-0.0074232404235044	594	-0.00188217620744346	594	-0.0103404369725499	594	-0.0110346314755132	594	-0.00575232763089861	594	-0.00103756403820299	594	-0.00234680162249656	594	-0.00935303982529678	594	-0.00902698135820756	594	-0.00221084932636018	594	-0.00184008681315895	594	-0.00559514129678806	594	-0.019796831793399	594	-0.0142235504696497	594	-0.00969789728200521
595	-2.74771890053316E-4	595	-0.00112882642019585	595	-0.0104573989458112	595	-0.00845609979815354	595	-0.00471077054884184	595	-0.00110379854972198	595	-0.0103120516951369	595	-0.00988582948553862	595	-0.00477844326425014	595	-0.00491881383092352	595	-0.00213518474150742	595	-0.00931341411319764	595	-0.00755113527725815	595	-0.00255961669086169	595	-0.00118249528622894	595	-0.00399044715383035	595	-0.0187666303864775	595	-0.0131375087700691	595	-0.00762473653893547
596	-6.84114480021591E-4	596	-0.00141117673715208	596	-0.00502399975402756	596	-0.00776747740755468	596	-0.00430830067417975	596	-1.65420892000334E-4	596	-0.0115836664177236	596	-0.0095770274955651	596	-0.00491514015951378	596	-0.00753006362364328	596	5.7643213948122E-4	596	-0.00670378840109986	596	-0.00664528919630758	596	-0.00243125188945559	596	-6.70138974180112E-4	596	-0.00306927361809084	596	-0.0178064289795561	596	-0.00993146707048886	596	-0.00610157579586446
597	-4.63457069991513E-4	597	-0.00100352705410778	597	-9.05666804333016E-4	597	-0.00572043389128574	597	-0.00311583079951738	597	0.00203295676572068	597	-0.0114852811403097	597	-0.00926822550559159	597	-0.00517197545047132	597	-0.00870131341636338	597	0.0031280490204697	597	-0.00470416268900209	597	-0.00594944311535794	597	-0.00324452228664196	597	-0.00123902914186491	597	-0.00231322403645073	597	-0.0166862275726345	597	-0.0061154253709077	597	-0.00490841505279427
598	0.00161720034004009	598	1.04122628936665E-4	598	0.00232266614536147	598	-0.00399339037501623	598	-0.00442336092485451	598	0.00226133442344256	598	-0.0110668958628972	598	-0.00744942351561662	598	-0.0056388107414298	598	-0.00949256320908276	598	0.00479966590145864	598	-0.00395453697690318	598	-0.00635359703440841	598	-0.00235779268382874	598	-0.00211791930954952	598	-0.00162717445481064	598	-0.0141760261657122	598	-0.00392938367132789	598	-0.00320525430972474
599	0.00224785775007064	599	8.81772311980278E-4	599	0.00329099909505626	599	-0.00360634685874661	599	-0.00668089105019209	599	0.00157971208116336	599	-0.0106385105854834	599	-0.00851062152564275	599	-0.00600564603238674	599	-0.0080038130018032	599	0.00738128278244865	599	-0.00211491126480468	599	-0.00384775095345802	599	-0.00246106308101535	599	-0.00156680947723409	599	-0.00143112487316976	599	-0.0118358247587906	599	-0.00405334197174678	599	-0.00127209356665414
600	0.00245851516010198	600	0.00237913238207721	600	0.0048393320447504	600	-0.00363930334247708	600	-0.00700842117552991	600	0.00101930649559367	600	-0.00978031766110909	600	-0.00807464454641149	600	-0.00830248132334521	600	-0.00380539566946414	600	0.0087116851334077	600	-0.00191984582081073	600	-0.00237995382521472	600	-0.00244433347820205	600	-0.00195569964491948	600	-0.00128507529153055	600	-0.0109409254622515	600	-0.00441741817495345	600	-0.00111771253640836
601	0.00209917257013359	601	0.00233925212851283	601	0.00523766499444545	601	-0.00300225982620717	601	-0.00728595130086784	601	0.0010525511801518	601	-0.00792270179585497	601	-0.00735714259941123	601	-0.00737931661430213	601	8.72023038049008E-4	601	0.00841844389428204	601	-0.00501846118112681	601	-0.00165630355508739	601	-0.0017776038753885	601	-0.00241458981260401	601	-0.00124902570989072	601	-0.00894193249686026	601	-0.00664184808652291	601	-3.89670644635132E-4
602	0.00133982998016435	602	0.00168937187494844	602	0.00292093769346469	602	-0.0031198467494713	602	-0.00686314256653464	602	0.00150579586470823	602	-0.00668508593060047	602	-0.00719964065241019	602	-0.0075664944993683	602	0.00269944174556258	602	0.00699520265515563	602	-0.0102870765414433	602	-0.00247265328495949	602	-0.00167291203426334	602	-0.00263079404913924	602	-1.71463732841382E-4	602	-0.00831293953146961	602	-0.0102462779980925	602	0.00118837124713789
603	3.50487390194942E-4	603	0.0011794916213832	603	-0.00305097035954294	603	-0.00291132499133706	603	-0.0042193172531908	603	0.00310904054926553	603	-0.00784747006534658	603	-0.00675213870540947	603	-0.00705470016675847	603	0.00445686045307614	603	0.00572196141602976	603	-0.0154456919017605	603	-0.00395900301483287	603	-0.00193433347820182	603	-0.0034589404922265	603	2.6063543043886E-4	603	-0.0084439465660795	603	-0.0117807079096623	603	5.16413138909932E-4
604	6.21144800226681E-4	604	6.19611367818962E-4	604	-0.0102928784125496	604	-0.00190280323320202	604	-8.95491939846949E-4	604	0.004212285233824	604	-0.00909985420009196	604	-0.00573463675840902	604	-0.00628290583414781	604	0.00495427916059032	604	0.00446872017690314	604	-0.0180443072620768	604	-0.00563535274470528	604	-0.00252575492214113	604	-0.00381708693531291	604	0.00114273459371805	604	-0.00879495360068905	604	-0.0113851378212315	604	-6.45544969317235E-4
605	-1.81977897426577E-5	605	-0.00118026888574541	605	-0.0186347864655572	605	-0.00325428147506734	605	0.00125833337349768	605	0.00351552991838133	605	-0.00803223833483724	605	-0.00616713481140785	605	-0.00481111150153879	605	0.00274169786810319	605	0.00402547893777694	605	-0.0188329226223933	605	-0.00786170247457818	605	-0.00233717636607977	605	-0.00310523337840074	605	0.00128483375699862	605	-0.00734596063529835	605	-0.0106095677328018	605	-0.00139750307754483
606	-1.45336418879261E-4	606	-0.00139014913930957	606	-0.0234566945185639	606	-0.00330575971693214	606	0.0036521586868421	606	0.00312877460293848	606	-0.00666462246958233	606	-0.00608963286440734	606	-0.00470931716892853	606	-0.0012608834243828	606	0.00298223769865036	606	-0.0169915379827099	606	-0.0107280522044508	606	-0.00317859781001761	606	-0.00226337982148817	606	0.00155693292027781	606	-0.00613696766990834	606	-0.0101939976443708	606	-0.00230946118577258
607	7.84136834482752E-4	607	-0.00132485627531587	607	-0.0200086025715702	607	-0.0020572379587982	607	0.00440598400018555	607	0.00188796343179831	607	-0.00639758175399319	607	-0.0057216272580094	607	-0.00461752283631878	607	-0.00350417974613482	607	0.00267458923165442	607	-0.0115966369983598	607	-0.0110644019343242	607	-0.00275001925395735	607	-0.00114152626457464	607	0.00197903208355665	607	-0.00533996867485165	607	-0.00830879629511205	607	-0.00257273792324941
608	9.63610087842959E-4	608	-7.82266465489734E-4	608	-0.0124005106245777	608	-0.00264871620066387	608	0.0040098093135299	608	0.00142552991838052	608	-0.00409077109827205	608	-0.00591742018785091	608	-0.00540572850370857	608	-0.00432776207959229	608	0.00123517787351091	608	-0.00534632947614266	608	-0.00998075166419632	608	-0.00331144069789602	608	-9.69672707662461E-4	608	0.001681131246837	608	-0.00468976726793002	608	-0.00651374244152247	608	-0.00147054211242637
609	9.83083341203894E-4	609	-0.0010896766556634	609	-0.00222878312000585	609	-0.00334767101909694	609	0.00278808086163274	609	0.00185309640496278	609	-0.00101396044255075	609	-0.00551321311769293	609	-0.00624533339089339	609	-0.00477134441305083	609	0.00102576651536701	609	-3.46021953927078E-4	609	-0.0104871013940695	609	-0.0023177765045217	609	-0.00151064172931559	609	8.82972347262978E-4	609	-0.0025795658610086	609	-0.0054586885879333	609	-0.00126834630160388
610	6.92556594565907E-4	610	-2.70868458365214E-5	610	0.00512456018793639	610	-0.00283883764933979	610	0.00224055073629614	610	0.00279066289154528	610	-0.00130714978682889	610	-0.00460900604753522	610	-0.00716556015354186	610	-0.00152492674650873	610	1.16355157222969E-4	610	0.00497428556828972	610	-0.00968345112394253	610	-0.00199185202789831	610	-0.00220953189700168	610	1.72476530864607E-4	610	-0.00173936445408618	610	-0.00487363473434232	610	-4.76150490780647E-4
611	8.62029847926493E-4	611	-3.04497036010432E-4	611	0.00732790349587642	611	-0.00354000427958123	611	0.00219302061095839	611	0.00327822937812616	611	-0.00329033913110699	611	-0.00343479897737708	611	-0.00822578691618947	611	0.00230149092003273	611	-1.93056200921582E-4	611	0.00745459309050567	611	-0.00910980085381485	611	-0.00118592755127356	611	-0.00245842206468616	611	-2.38019285534463E-4	611	-0.00135916304716499	611	-0.00363858088075375	611	0.00136604532004192
612	6.91503101287516E-4	612	-2.91907226183774E-4	612	0.00539124680381775	612	-0.00508117090982285	612	0.00292549048562041	612	0.00464579586470837	612	-0.0031435284753849	612	-0.00227059190721857	612	-0.00678601367883847	612	0.00521790858657489	612	-4.24675590657841E-5	612	0.00989490061272225	612	-0.00795615058368782	612	-0.00116000307464947	612	-0.00269731223237013	612	-0.00312851510193202	612	-9.58961640242784E-4	612	-0.00483352702716289	612	0.00160824113086377
613	0.0011109763546493	613	-6.11516316855187E-5	613	7.04590111759273E-4	613	-0.00618233754006425	613	0.00389796036028223	613	0.00435751817493557	613	-5.46867999467793E-4	613	-8.38862012374264E-4	613	-0.00540624044148785	613	0.00670420650629922	613	6.96784943666096E-4	613	0.00937776307782467	613	-0.00629139140641044	613	0.00125592140197384	613	-0.00129620240005579	613	-0.00255901091833088	613	-9.96351077029445E-5	613	-0.00622857332688209	613	3.64605261324868E-4
614	0.00115044960800947	614	9.39082415323256E-5	614	-0.00190206658029979	614	-0.00639350417030649	614	0.00358043023494492	614	0.00488035727392244	614	7.39101649346985E-4	614	-1.38527123970889E-4	614	-0.0036864672041359	614	0.00809995359066296	614	2.4989120642438E-4	614	0.00675237828019792	614	-0.00155353125624202	614	0.00106184587859826	614	-2.35092567740125E-4	614	-0.00219950673472979	614	-0.00129433299732007	614	-0.00568408033182344	614	2.66143662115859E-4
615	0.00222992286137025	615	1.78968114750155E-4	615	2.43127982722413E-4	615	-0.00601467080054796	615	0.00284214391190218	615	0.00525319637291055	615	0.00124507129816109	615	6.1807764431876E-5	615	-0.00130705363406491	615	0.0063257006750268	615	9.12997469183274E-4	615	0.00237699348257348	615	0.00124432889392612	615	9.46169816911535E-4	615	4.36017264575206E-4	615	-0.0016105893189966	615	-0.00141903088693685	615	-0.00615958733676525	615	-0.00100231793709238
616	0.00243939611473198	616	2.64027987967985E-4	616	0.00241165204268956	616	-0.00395583743078909	616	0.0026789963178997	616	0.00499603547189853	616	0.0013910409469764	616	-1.47857347164049E-4	616	6.50047789201302E-4	616	0.00408144775939068	616	0.00171610373194131	616	0.00102160868494749	616	0.00357218904409518	616	0.00100591886608203	616	-2.28729031093167E-5	616	-5.097296967147E-4	616	-0.00226372877655479	616	-0.00609509434170619	616	-0.00292077953630088
617	0.00174886936809315	617	7.89087861186033E-4	617	0.00337017610265633	617	-0.00101700406103156	617	0.00285584872389588	617	0.00249887457088604	617	3.97010595790448E-4	617	-7.17522458761444E-4	617	-3.32850787531314E-4	617	0.00233719484375516	617	0.00147920999469964	617	-4.37761126779179E-5	617	0.00376004919426354	617	0.00123566791525231	617	7.58236929206291E-4	617	0.00182112992556949	617	-0.00153842666617177	617	-0.00316060134664742	617	-0.00293924113550936
618	0.00101834262145406	618	0.00161414773440249	618	0.00275870016262392	618	0.00299182930872721	618	0.00145270112989238	618	0.00122171366987356	618	-0.00349701975539496	618	-0.00221718757035827	618	4.25063573583628E-6	618	0.0018929419281184	618	0.00171231625745971	618	2.08390896974109E-5	618	0.00325790934443226	618	-1.44583035577739E-4	618	3.39346761521142E-4	618	0.0021419895478525	618	-8.3312455578799E-4	618	-9.56108351587659E-4	618	-0.0015177027347173
619	0.00117781587481591	619	0.00215920760762067	619	9.8722422259101E-4	619	0.00402066267848511	619	6.49553535889247E-4	619	-0.00152544723113923	619	-0.00838105010658019	619	-0.00276685268195465	619	6.13520590029282E-5	619	-4.13109875170292E-5	619	0.00136542252021776	619	-0.00145454570792847	619	-4.34230505399924E-4	619	5.95166013592774E-4	619	-2.69543406163919E-4	619	0.00291284917013623	619	1.42177554594447E-4	619	5.83846434700774E-5	619	-0.0013761643339274
620	4.03901010673557E-4	620	0.00176789599601612	620	-0.0022542517174422	620	0.00480949604824321	620	-2.43594058114027E-4	620	-0.00341625840227788	620	-0.00932564411766101	620	-0.00105439798952833	620	-0.00143154651772992	620	4.42174461001699E-5	620	1.4284039558099E-4	620	-0.00358233712239109	620	-0.00235003474722362	620	0.00167491506276285	620	-2.18433573848209E-4	620	0.00346370879241853	620	5.5968509167581E-4	620	0.00189248839995848	620	6.63531953043695E-4
621	-2.97809892635392E-4	621	0.00203542593262451	621	-0.00463572765747422	621	0.00232832941800165	621	-7.86741652117229E-4	621	-0.00357909750126595	621	-0.00850055127312821	621	1.2367881624531E-4	621	-0.00110444509446239	621	6.29624407080698E-4	621	-0.00133290194427627	621	-0.00788479887954097	621	-0.00411898587348869	621	0.00147466411193253	621	7.72676258467442E-4	621	0.00395456841470221	621	0.00172619564358989	621	0.00149637591279639	621	0.00125442706567114
622	4.90479204055205E-4	622	8.5295586923273E-4	622	-0.00637442901671914	622	-0.00110283721224036	622	-0.00219877941380542	622	-0.00194193660025377	622	-0.00822545842859501	622	7.51755622017569E-4	622	-6.7926051710554E-4	622	0.00123503136806047	622	-0.00240864428413268	622	-0.0104072606366916	622	-0.00374793699975395	622	8.51659223267021E-4	622	-3.24744700170854E-5	622	0.00333079989928464	622	0.00129270619550326	622	-2.69736574366242E-4	622	2.85322178297243E-4
623	6.2876830074643E-4	623	-5.4951419415783E-4	623	-0.00454442901671914	623	-0.00292400384248204	623	-0.00296933663179466	623	-7.8477569924118E-4	623	-0.00763036558406149	623	0.00218983242779025	623	-0.00138548162674912	623	9.30438329040939E-4	623	-0.00322438662398916	623	-0.010779722393842	623	-0.0036668881260189	623	1.90634780189214E-4	623	-2.7488294308764E-4	623	0.00315030408288575	623	0.00110921674741871	623	-5.45849061529324E-4	623	-5.53782709076245E-4
624	3.70573974368682E-5	624	-0.00128198425754977	624	-0.00121442901671909	624	-0.00240517047272348	624	-0.00297989384978603	624	0.00100238520177065	624	-0.00669527273952841	624	0.00237790923356318	624	-0.00232170273639198	624	2.15845290020056E-4	624	-0.00399012896384576	624	-0.00923218415099214	624	-0.00103583925228445	624	-2.50389662888928E-4	624	4.32708583842256E-4	624	0.00295980826648723	624	0.00144572729933223	624	-0.00135196154869188	624	-6.62887596448947E-4
625	3.35346494128252E-4	625	-7.7445432093981E-4	625	0.00410557098328113	625	-0.00323633710296534	625	-0.00345045106777597	625	0.00232954610278302	625	-0.00887017989499572	625	0.00130598603933585	625	-0.00196792384603572	625	-0.00106874774899968	625	-0.00369587130370164	625	-0.00687464590814191	625	3.65209621451257E-4	625	-6.51414105966808E-4	625	5.70300110771527E-4	625	0.00272931245008934	625	8.42237851246708E-4	625	-0.00171807403585333	625	-0.00220199248382347
626	0.0010336355908187	626	-6.23682019750049E-4	626	0.0098255709832813	626	-0.00101750373320719	626	-0.00439100828576589	626	0.00193008561381447	626	-0.0108251848292111	626	-6.27006603338032E-4	626	-0.00264414495567866	626	-0.00160334182351107	626	-9.2267059496276E-4	626	-0.00386243732260549	626	0.00319625849518612	626	-1.62438549045518E-4	626	6.17891637699763E-4	626	0.00165881663369039	626	4.8557242334013E-4	626	-0.00107425617722079	626	-0.00188430266318029
627	5.80740530839563E-4	627	9.28788043641937E-4	627	0.0140655709832815	627	-7.38670363449323E-4	627	-0.00467156550375591	627	0.00119211354166193	627	-0.0111610045863344	627	-0.00189891131640429	627	-0.00206036606532134	627	-0.00123794452711934	627	0.00116172218541877	627	-0.00502797588133941	627	0.00435730736892026	627	4.16537007875917E-4	627	0.00210548316462944	627	0.00158832081729177	627	6.65773830261784E-4	627	-3.91018770295126E-4	627	-0.00217332360906575
628	0.00129784547086054	628	8.3125810703244E-4	628	0.013438595774101	628	-0.00276409995437898	628	-0.00431082638282376	628	4.64141469510793E-4	628	-0.00977682434345706	628	-0.00298081602946976	628	-7.36663583652764E-4	628	-7.025472307296E-4	628	0.0028861149658006	628	-0.00551351444007242	628	0.00628835624265545	628	0.00184566238860295	628	0.00213457046723953	628	0.00173654528169997	628	7.59752371841671E-5	628	-7.87781363368545E-4	628	-0.00197234455495288
629	0.00205495041088088	629	9.83728170424136E-4	629	0.0117158848967369	629	-0.00422694054042427	629	-0.00377397397682699	629	-3.93830602640755E-4	629	-0.00805264410057926	629	-0.00316272074253554	629	-0.00156685794503275	629	6.82850065661711E-4	629	0.00342050774618219	629	-0.00283905299880605	629	0.00612940511638982	629	0.00139242878340617	629	0.0010299423295379	629	0.00238950406726346	629	-0.00156382335589456	629	-0.00141454395644303	629	-7.51365500838652E-4
630	0.00246205535090205	630	7.4619823381461E-4	630	0.00969317401937353	630	-0.00309978112646903	630	-0.0024271215708298	630	-0.00112180267479189	630	-0.00461846385770226	630	-0.00282462545560147	630	-0.00326705230641178	630	0.00218824736205203	630	0.00249490052656398	630	8.65408442460414E-4	630	0.00440045399012412	630	4.29195178208275E-4	630	-2.34685808162993E-4	630	0.00252246285282709	630	-0.00188362194897262	630	-0.0031313065495171	630	-1.90386446725199E-4
631	0.00106916029092297	631	9.68668297206321E-4	631	0.00630046314200872	631	-0.00270262171251368	631	-0.00177026916483403	631	-4.89774746944782E-4	631	-0.00140428361482492	631	-0.00195653016866792	631	-0.00406724666779201	631	0.00118364465844323	631	-0.00176070669305606	631	0.00118986988372694	631	2.11502863859181E-4	631	-4.44038426988591E-4	631	-8.09313945865142E-4	631	0.00242542163838966	631	-0.00239342054204972	631	-0.00304806914259093	631	-0.00106940739261052
632	2.62652309430678E-5	632	0.00151036605940647	632	0.00489775226464584	632	-0.00160546229855818	632	-0.00139341675883653	632	5.22531809039606E-5	632	3.69896628051869E-4	632	3.81565118267702E-4	632	-0.00478744102917084	632	-0.00124095804516511	632	-0.00367631391267409	632	0.00133433132499317	632	-0.00298744826240593	632	-9.87272032187292E-4	632	-0.00164394208356544	632	0.00224838042395348	632	-0.00223321913512819	632	-0.00230483173566487	632	6.15716615017803E-5
633	-0.00119018229904544	633	0.00169777624958023	633	0.00513504138728216	633	4.81697115396251E-4	633	-0.00142656435284039	633	6.42389010959477E-4	633	-4.86465071373843E-4	633	0.00164563714615174	633	-0.00598763539055103	633	-0.00382537743780098	633	-0.0036378504561716	633	0.00109332021795971	633	-0.00534883290209009	633	-0.00130050563738404	633	-8.78570221267694E-4	633	0.00166133920951594	633	-0.00131941250249668	633	-0.00156199131708323	633	-2.36096697620702E-4
634	-0.00131728723906654	634	0.00173518643975434	634	0.00372233050991788	634	0.00156885652935124	634	-0.00199971194684334	634	0.00178360576766767	634	3.36766772473851E-4	634	0.00164669172974996	634	-0.00448782975193129	634	-0.00548965934720602	634	-0.00311383399257892	634	-0.00243929530029874	634	-0.0043570426768369	634	2.76260757418711E-4	634	4.66801641032077E-4	634	1.24297995078848E-4	634	4.27098049416763E-4	634	9.05513602402763E-5	634	-8.50250616670323E-4
635	-0.00132439217908686	635	6.92596629926712E-4	635	3.72580719949944E-4	635	0.00157601594330714	635	-0.00346285954084635	635	0.0035648225243774	635	0.00273999861632124	635	0.0020277463133489	635	-0.0014401582535708	635	-0.0065739412566117	635	-0.00184981752898583	635	-0.00399191081855665	635	-0.0014752524515842	635	0.00147692913986663	635	4.67384719321728E-4	635	-6.96445729518658E-4	635	0.00208360860133094	635	0.00235309403756467	635	-2.94404535719828E-4
636	-6.14971191081892E-5	636	-9.99317989958115E-6	636	-0.00184371446805631	636	-7.76824642738205E-4	636	-0.00400600713485044	636	0.00432603928108577	636	0.00297323046016906	636	0.00209880089694803	636	-2.44976585512369E-4	636	-0.00622822316601557	636	-0.00116580106539299	636	-0.00271452633681601	636	0.00337653777366942	636	0.00280214984123628	636	1.20714216267359E-4	636	-6.44842382637734E-4	636	0.002450119153246	636	0.00250563671488724	636	6.11441545228963E-4
637	6.7139794087101E-4	637	-0.00143258298972615	637	-0.00440000965606302	637	-0.00136966522878268	637	-0.00454915472885364	637	0.00553725603779487	637	0.00246646230401648	637	0.00139985548054611	637	3.30205082545554E-4	637	-0.00504250507542103	637	-0.00210178460179922	637	-0.0017471418550743	637	0.00763832799892228	637	0.00328737054260575	637	-8.259562867865E-4	637	1.36760964243976E-4	637	0.00270662970515989	637	0.00245817939221116	637	7.77287626180012E-4
638	0.00139429300085059	638	-0.00153517279955206	638	-0.00373630484406906	638	-0.00183250581482763	638	-0.00538230232285652	638	0.00623847279450462	638	0.00185969414786324	638	0.00105091006414426	638	9.75386750603491E-4	638	-0.00308678698482545	638	-0.00336776813820716	638	-0.00360975737333291	638	0.00897011822417504	638	0.00302259124397519	638	-0.0022926267898411	638	0.001288364311125	638	0.00158314025707362	638	0.00280072206953452	638	3.23133707129664E-4
639	0.00161718806082956	639	-7.97762609378694E-4	639	-0.00292260003207545	639	-0.00240534640087287	639	-0.00618544991685965	639	0.00744931792315651	639	-4.2710915816091E-4	639	0.0019818178354738	639	1.05684186610944E-5	639	-0.00217104563519488	639	-0.003654110006301	639	-0.00548697178878577	639	0.00620581054401725	639	0.00252781194534446	639	-0.00313929729289519	639	0.00248996765800591	639	4.99650808987617E-4	639	0.00117323834138361	639	-5.42413817131049E-4
640	8.37815577011902E-4	640	-4.10352419205395E-4	640	-0.00378889522008219	640	-0.00215818698691717	640	-0.00550859751086286	640	0.00692012909429529	640	-0.00300486151071855	640	5.18761675558643E-4	640	-0.00261424991328063	640	-0.00327467629160072	640	-0.00363012682996011	640	-0.00766835642846875	640	0.00318685941775154	640	0.00322303264671397	640	-0.00251596779594898	640	0.00294157100488679	640	4.61613609017419E-5	640	5.85041665414288E-4	640	-0.00126558868206672
641	-2.43824450600449E-4	641	-2.42942229031762E-4	641	-0.00496519040808874	641	-0.00108102757296269	641	-0.00808174510486648	641	0.00692094026543533	641	-0.00274261386327535	641	7.95705515643341E-4	641	-0.00255906824522256	641	-0.00368830694800604	641	-0.00142614365362004	641	-0.0100897410681524	641	0.00102790829148613	641	0.00271825334808273	641	-0.00245263829900377	641	0.00298317435176809	641	3.02671912815633E-4	641	-5.93155010554902E-4	641	-0.00185876354700376
642	4.53552178747429E-6	642	-2.75532038857662E-4	642	-0.00565411472931743	642	-0.00123128886835477	642	-0.00918997002631716	642	0.00760175143657449	642	-0.00114036621583224	642	0.0014826493557285	642	-0.00102865277608011	642	-0.00310193760441191	642	0.00103783952272174	642	-0.0111311257078359	642	-0.0014510428347787	642	0.00277148589154574	642	-0.00236900734508971	642	0.00206132817401539	642	6.19182464730805E-4	642	-0.00303135168652346	642	-0.00321193841194134
643	1.52895494173855E-4	643	-6.0812184868464E-4	643	-0.00920140385195456	643	-0.00232233960091044	643	-0.00816873508898652	643	0.0080125626077141	643	6.71881431610899E-4	643	0.00127959319581183	643	-8.08744349375168E-4	643	-0.0036855682608179	643	0.00158182269906249	643	-0.0108525103475188	643	-7.9999396104391E-4	643	0.00122557075863483	643	-0.0017678975127744	643	6.77625663854542E-4	643	0.00179569301664451	643	-0.00626954836249283	643	-0.00295511327687681
644	-1.48744533438716E-4	644	-0.00100071165851023	644	-0.0113186929745899	644	-0.00220339033346661	644	-0.00725750015165438	644	0.00694337377885379	644	0.00155412907905284	644	0.0011665370358962	644	-8.38835922670533E-4	644	-0.00349919891722461	644	0.00227580587540377	644	-0.00682389498720237	644	8.01054912690446E-4	644	7.39655625724644E-4	644	-9.26787680458396E-4	644	-1.36076846306565E-4	644	0.00240220356855847	644	-0.00772774503846119	644	-0.00232828814181385
645	-5.20384561050413E-4	645	-0.0011520631855948	645	-0.00910598209722657	645	-0.00134444106602238	645	-0.00729626521432358	645	0.00610418494999276	645	0.00213637672649547	645	0.00117348087598135	645	5.81072504033386E-4	645	-0.00232282957363061	645	0.00248978905174457	645	-0.00248527962688527	645	0.00312210378642508	645	-1.46259507185498E-4	645	-9.25677848143458E-4	645	7.30220643532675E-4	645	0.00145871412047249	645	-0.0092859417144302	645	-0.00167146300675025
646	2.57975411336098E-4	646	-0.00152182369272325	646	-0.00331327121986291	646	-3.0549179857875E-4	646	-0.00544503027699328	646	0.00556979332834739	646	0.00386811437704981	646	-5.90964681071782E-4	646	3.10980930739113E-4	646	-8.85969374139428E-4	646	0.00218942601032524	646	0.00393495101477725	646	0.00352771208067182	646	-0.00127217464009632	646	-6.84568015828724E-4	646	8.66518133372018E-4	646	0.00134549842289999	646	-0.00978453037889082	646	-5.1226672181226E-4
647	-9.08203261484886E-5	647	-8.81584199852625E-4	647	0.00235943965750085	647	9.33457468865306E-4	647	-0.00321379533966137	647	0.0044201989139161	647	0.00533934203071329	647	-0.00187679963526222	647	-0.00167911064255666	647	-1.86183187524946E-5	647	3.64716751144023E-4	647	0.00952679693778524	647	0.00452787979543068	647	-0.0012580897730059	647	-7.34581835128978E-5	647	0.00130281562321066	647	8.02556475842486E-4	647	-0.00944351103184271	647	5.79300712999498E-4
648	-0.00110866796692388	648	-1.91344706982122E-4	648	0.00802659676962314	648	0.00177956476251673	648	0.00138938410605327	648	0.00278060449948647	648	0.00464056968437809	648	-0.00234263458945172	648	-0.0019558182520738	648	-5.12672633661282E-5	648	-4.49992508035457E-4	648	0.012308642860793	648	0.00192804751018993	648	3.29076323402511E-4	648	3.28484023039088E-4	648	0.00207120719900278	648	4.89614528785154E-4	648	-0.00906249168479523	648	0.00106086814781214
649	-0.00233651560769932	649	1.18894785888557E-4	649	0.0109465967696227	649	0.00212030388344964	649	0.00908623651205076	649	9.01010085056164E-4	649	0.00422179733804207	649	-0.0018284695436428	649	-0.00154280059667933	649	-0.00170391620797883	649	-0.00178470176721657	649	0.0106704887838012	649	-0.00100178477505075	649	0.00170206251963378	649	-7.14668174629729E-4	649	0.00198355427048114	649	9.96672581726088E-4	649	-0.00862147233774735	649	5.32435582623947E-4
650	-0.00182436324847401	650	0.00109913427875874	650	0.0107365967696227	650	0.00174104300438227	650	0.0161930889180475	650	-4.98584329374552E-4	650	0.00402302499170659	650	-0.00157430449783291	650	-0.00135978294128503	650	-0.00378656515259213	650	-0.00350941102639624	650	0.00644233470680966	650	-0.00285161706029147	650	0.00276504871586525	650	-4.57820372298023E-4	650	0.00245590134195961	650	0.00156373063466919	650	-0.0089304529906995	650	5.44003017435735E-4
651	-0.00122221088924945	651	0.00237937377163	651	0.00567659676962329	651	0.00108178212531485	651	0.023589941324043	651	-0.00110817874380409	651	5.9425264537083E-4	651	-5.50139452022869E-4	651	-0.00155676528588966	651	-0.00529921409720568	651	-0.00538412028557644	651	0.00163418062981702	651	-0.00273144934553216	651	0.00374803491209796	651	-6.0972569967177E-5	651	0.00225824841343947	651	0.00141078868761113	651	-0.00818943364365143	651	-2.44429547751501E-4
652	-7.4005853002479E-4	652	3.69512282017759E-4	652	-2.43403230377304E-4	652	0.00216252124624727	652	0.0286867937300404	652	-2.17773158235346E-4	652	-0.00349451970096482	652	-5.15974406214426E-4	652	-0.00135374763049612	652	-0.00654186304181792	652	-0.00538882954475639	652	-0.00404397344717466	652	-0.00245128163077268	652	0.00402102110833003	652	-5.04124767634728E-4	652	0.00187059548491852	652	0.00129784674055422	652	-0.00779841429660344	652	-9.92862112939363E-4
653	2.09382919980072E-6	653	-0.00402514190621073	653	-0.00659340323037672	653	0.00467326036717974	653	0.0288336461360368	653	8.72123064630692E-4	653	-0.005674310131627	653	-3.63054828489418E-4	653	-0.0026207299751011	653	-0.00491324667908	653	-0.00523044025568797	653	-0.00880250105681668	653	-0.00128949421509894	653	0.00463400730456165	653	-0.00160727696530394	653	0.00133294255639704	653	0.00136817220031205	653	-0.00758819395734633	653	-0.00119289334864714
654	4.09739930886666E-4	654	-0.00943979609443879	654	-0.00856340323037674	654	0.00468399948811271	654	0.0257104985420344	654	0.00268644486665437	654	-0.00624413826911585	654	-0.00201018137921238	654	-0.00347771231970651	654	-0.00160458345310577	654	-0.00422230657594191	654	-0.0106151165750754	654	0.00117642726357037	654	0.00436699350079373	654	-8.00429162971739E-4	654	0.00221528962787598	654	9.60840897358928E-4	654	-0.00639800321097184	654	2.90719909330939E-4
655	3.87386032573822E-4	655	-0.0146444502826668	655	-0.00736294295527085	655	0.00346889261078509	655	0.0215073509480312	655	0.00450076666867982	655	-0.00685396640660407	655	-9.27307929935672E-4	655	-0.00388436341864473	655	0.00109407977286757	655	-0.00247417289619634	655	-0.00988773209333438	655	0.00239234874223904	655	0.00417677415786244	655	-1.92033423938476E-4	655	9.17636699354851E-4	655	0.00217350959440665	655	-0.00493781246459779	655	-1.25666832690996E-4
656	-7.04967865740258E-4	656	-0.0207791044708951	656	-0.00344504211854968	656	0.00215636363636396	656	0.0180742033540273	656	0.00523508847070353	656	-0.00681379454409292	656	-6.24434480658742E-4	656	-0.00377751101264856	656	0.0020827429988417	656	-7.26039216451646E-4	656	-0.0111203476115929	656	0.00273827022090956	656	0.00496837771905767	656	-1.44441897009351E-4	656	5.49983770834039E-4	656	0.00346617829145401	656	-0.00542762171822186	656	-1.22053574713732E-4
657	-9.07321764053393E-4	657	-0.0260137586591238	657	8.72858718169667E-4	657	-6.46165338057614E-4	657	0.0149410557600236	657	0.00354941027272915	657	-0.00606362268158112	657	-8.91561031381549E-4	657	-0.00328065860665117	657	0.00206140622481588	657	0.00173209446329459	657	-0.010762963129852	657	0.00249419169957932	657	0.00736998128025324	657	4.13149629920007E-4	657	4.82330842313417E-4	657	0.00298884698850177	657	-0.004927430971847	657	-4.84403167364533E-5
658	-0.00122967566236731	658	-0.0284673151583199	658	0.00359075955489097	658	-0.00330869431247915	658	0.0124879081660207	658	0.0033937320747528	658	-0.00523345081906967	658	-0.00126868758210552	658	-6.63806200654982E-4	658	4.40069450789338E-4	658	0.00362022814303931	658	-0.0089955786481104	658	0.00269011317824841	658	0.0125615848414489	658	0.00249074115684955	658	4.34677913792036E-4	658	0.00288151568554973	658	-0.00394724022547255	658	-1.94827058759728E-4
659	-3.22029560679837E-4	659	-0.030632924353645	659	0.00353866039161055	659	-0.00358122328690058	659	0.00987476057201775	659	8.69449425736413E-4	659	-0.00387374678021324	659	9.34820419701055E-4	659	0.00148304620534212	659	-0.00179056340450057	659	0.00403655497389366	659	-0.00992366671466804	659	3.66148171872638E-4	659	0.0164031884026441	659	0.00402833268377822	659	-3.3297501472962E-4	659	0.00168449417036154	659	-0.00458742371811027	659	-0.00171543618895953
660	-5.62314788577822E-4	660	-0.0352085335489694	660	0.00303656122833118	660	-0.00270375226132202	660	0.00981161297801414	660	-0.0012063058246703	660	-0.00331466650622936	660	0.00171917449154879	660	0.00160989861133842	660	-0.00197025770147796	660	0.00424047267289485	660	-0.0128090515122929	660	-0.00201766548122961	660	0.0176447919638401	660	0.00498592421070754	660	-3.90627943249733E-4	660	6.5788570552705E-4	660	-0.00480810619609962	660	-9.65008503394316E-4
661	-3.26394005226938E-4	661	-0.0401141427442946	661	0.00259374880441854	661	-1.62806324471632E-4	661	0.00817716904508803	661	-0.00142206107507636	661	-0.00239558623224578	661	0.00195352856339603	661	0.00106545467841279	661	-5.49951998455533E-4	661	0.00403439037189557	661	-0.0148944363099188	661	-0.003761479134333	661	0.0183880199184641	661	0.00595257487811551	661	1.03230709269653E-5	661	-8.38722759307409E-4	661	-0.00422878867408905	661	-0.00153458081782887
662	-0.00130047322187643	662	-0.04388975193962	662	0.0026285588450623	662	0.00103972264995011	662	0.00634840398241909	662	-0.00138781632548124	662	-0.00211650595826107	662	0.0027478826352425	662	5.66896157430108E-5	662	-9.64629543176443E-6	662	0.0041383080708961	662	-0.0151598211075443	662	-0.00490529278743512	662	0.0171666625178508	662	0.00634942268044725	662	6.86620560767182E-4	662	-0.00166533122414148	662	-0.00452947115207802	662	-0.00199415313226403
663	2.25447561474468E-4	663	-0.0472153611349446	663	0.0050633688857058	663	0.001162251624371	663	0.00621963891975064	663	-0.00439357157588738	663	-0.00147742568427667	663	0.00404223670709047	663	-0.00232207544692464	663	1.40659407590782E-4	663	0.00427222576989728	663	-0.0147852059051692	663	-0.00440910644053805	663	0.0115153051172383	663	0.0051662704827784	663	0.00162291805060555	663	-0.0028419396889765	663	-0.00359015363006598	663	-0.00114372544669905
664	4.2136834482509E-4	664	-0.0482514703446402	664	0.00571817892634918	664	0.0011747805987925	664	0.00816087385708197	664	-0.00508932682629393	664	-0.00140834541029289	664	0.00373659077893773	664	-0.00360084050959397	664	0.00148096511061269	664	0.00400614346889761	664	-0.0121305907027942	664	-7.22920093640944E-4	664	0.00592394771662619	664	0.00353311828510972	664	0.00125921554044428	664	-0.00239854815381069	664	-0.00193083610805544	664	-2.33297761133677E-4
665	0.00100728912817605	665	-0.0452448797641543	665	0.00531298896699361	665	-5.52690426785851E-4	665	0.00944210879441254	665	-0.00304508207670029	665	-0.00106926513630867	665	0.00320094485078393	665	-0.00347960557226301	665	0.0021112708136366	665	0.00272006116789925	665	-0.00924597550041906	665	0.00283326625325575	665	0.00250259031601274	665	0.00150996608744158	665	8.65513030284149E-4	665	-0.00177515661864547	665	-7.81518586045138E-4	665	-2.12870075569249E-4
666	9.43209911526743E-4	666	-0.0406982891836671	666	0.00363779900763639	666	-0.00253016145236451	666	0.0113933437317444	666	-0.00199558350605678	666	-9.11914568790806E-5	666	0.00394823531193467	666	-0.00200837063493164	666	5.23244964322878E-4	666	0.00185192674763801	666	-0.00739355801346164	666	0.00614960084795513	666	-5.78767084600251E-4	666	-1.93186110227117E-4	666	5.31810520122633E-4	666	-9.01454227594023E-4	666	2.76979428774915E-4	666	0.00133970567057951
667	0.00106913069487735	667	-0.0354116986031814	667	6.72609048280037E-4	667	-0.00131763247794314	667	0.0124045786690754	667	-0.00153345447688924	667	0.00157676143120256	667	0.00387587813980161	667	-9.67135697601762E-4	667	2.55419328730966E-4	667	9.35460730664417E-5	667	-0.00526340425235361	667	0.00755595323238989	667	-0.00159012448521256	667	-7.96338307894828E-4	667	-8.18919900389403E-5	667	-3.37714533835687E-4	667	3.45379102731691E-4	667	0.00167213918399689
668	4.50514782279754E-5	668	-0.0296951080226942	668	-0.00242527655645919	668	7.16735278450287E-4	668	0.0130195945949314	668	0.00105867455227848	668	0.00219471431928575	668	0.0030435209676698	668	3.44099239730333E-4	668	2.57593693137714E-4	668	-0.00215483460150523	668	-0.00140325049124534	668	0.00638230561682462	668	-2.73763151106721E-4	668	-5.5512782649636E-4	668	-7.85594500198883E-4	668	5.06025159921819E-4	668	-7.56221223311648E-4	668	7.545726974163E-4
669	-3.99027738421154E-4	669	-0.025548517442207	669	-0.00219218576038216	669	0.00247599615751781	669	0.0122764470009287	669	0.00399080358144666	669	0.00145266720736892	669	0.00175116379553675	669	0.00249533417706171	669	-0.00111023194245519	669	-0.00327321527607616	669	4.5690326986314E-4	669	0.00493865800125981	669	0.00239549013986373	669	-5.21798329550904E-4	669	-8.4929701036085E-4	669	0.00159976485368052	669	-0.00154782154935429	669	7.17006210833482E-4
670	-0.00141310695507002	670	-0.021981926861721	670	-0.00231909496430482	670	0.0055552570365851	670	0.00976329940692455	670	0.00421293261061528	670	0.00143062009545147	670	2.188066234039E-4	670	0.00247656911439265	670	-0.0017480575780473	670	-0.00213159595064916	670	4.9705703097036E-4	670	0.00373501038569479	670	0.00418474343083375	670	2.9153116739522E-4	670	-0.00108299952052082	670	0.00122350454743803	670	-0.00301942187539783	670	4.49439724251377E-4
671	-0.00106718617172064	671	-0.0189601492828491	671	-0.00150600416822844	671	0.0064445179156527	671	0.00776015181292156	671	0.0025250616397825	671	1.08572983533506E-4	671	2.76449451271255E-4	671	4.37804051723667E-4	671	-0.00109588321364029	671	-4.69976625220525E-4	671	5.572107920786E-4	671	7.51362770130548E-4	671	0.00555399672180457	671	0.00131486066434139	671	-0.001636702030682	671	1.07244241196902E-4	671	-0.00393102220144126	671	-7.78126762329912E-4
672	-0.00133126538836947	672	-0.0169807782047853	672	0.00218708662784817	672	0.0043437787947207	672	0.00782700421891835	672	-1.48945460495042E-4	672	-0.00316388955098201	672	9.84654327718992E-4	672	-0.00116096101094509	672	-2.4304636661121E-4	672	2.91111399017829E-4	672	-6.87086017958194E-4	672	-2.22260842989819E-4	672	0.00427325001277445	672	0.00335819016128713	672	-0.00313040454084224	672	6.31003283907638E-4	672	-0.00337296626739381	672	-4.42906038490953E-4
673	-0.00225534460501908	673	-0.0162714071267214	673	0.00770017742392515	673	0.00110303967378744	673	0.0053038566249155	673	-0.00235399759377231	673	-0.00407709984617544	673	5.53870891608632E-4	673	-0.00156972607361361	673	4.80982949136788E-4	673	2.51243081113017E-4	673	-0.00367539385605919	673	-8.35841251706881E-4	673	5.12503303744971E-4	673	0.00549151965823302	673	-0.00366410705100417	673	0.00143479715473571	673	-0.00271552906518124	673	-1.02668335896006E-4
674	-0.00210603570416534	674	-0.0145220360486569	674	0.0104651194750831	674	-0.00230348175413475	674	0.00254836328054964	674	-0.00248904972705066	674	-0.00348031014136829	674	-7.8691254450014E-4	674	-0.00346913930574466	674	0.00181501226488567	674	-9.88625236791663E-4	674	-0.00508370169415873	674	-0.00161942166042461	674	-0.00346844170089611	674	0.00693382380925911	674	-0.00300920561846585	674	7.4859102556335E-4	674	-0.00257809186296942	674	-6.8243063329998E-4
675	-6.28930764144719E-4	675	-0.0139626649705926	675	0.0114609211485233	675	-0.00654766753564839	675	-2.28447483252125E-4	675	-0.00276410186032905	675	-0.0021935204365624	675	-0.00268769598060903	675	-0.00377352183707913	675	0.00282904158063424	675	-0.00247849355469487	675	-0.00496200953225934	675	-0.00242300206914248	675	-0.00556090697189315	675	0.00773493364157396	675	-0.00184500729190695	675	2.23848963907258E-5	675	-0.00126065466075698	675	-8.12192930705002E-4
676	-1.71825824123673E-4	676	-0.0140932938925289	676	0.0114167228219637	676	-0.00735185331716259	676	-0.00300525824705478	676	-0.00145915399360685	676	4.73269268244536E-4	676	-0.005008479416718	676	-0.00261790436841292	676	0.00450307089638269	676	-0.00390836187259946	676	-0.0027403173703604	676	-8.26582477859716E-4	676	-0.00726337224289075	676	0.00919604347388958	676	-0.00130080896534768	676	-4.73821232781724E-4	676	-0.00115321745854491	676	-0.00107195522810954
677	0.00100527911589676	677	-0.0125857101784881	677	0.00828252449540479	677	-0.00648603909867784	677	-0.00618206901085738	677	0.00114579387311409	677	0.00613005897305197	677	-0.00626926285282625	677	2.77713100252264E-4	677	0.00595710021213058	677	-0.00445823019050451	677	0.0011213747915404	677	-7.20162886577391E-4	677	-0.00866583751388816	677	0.00847715330620424	677	4.33893612123981E-5	677	2.99726380461607E-5	677	-5.7578025633287E-4	677	-0.00143171752551385
678	0.00132238405591778	678	-0.0104329778810808	678	0.00189832616884544	678	-0.00423022488019154	678	-0.00716887977465941	678	0.00344074173983699	678	0.0110768486778587	678	-0.00575004628893527	678	4.73330568918406E-4	678	0.0062611295278785	678	-0.00290809850840912	678	0.00269306695343907	678	0.00250625670470495	678	-0.00804830278488478	678	0.00517826313851977	678	0.0010875876877714	678	-4.56233491125779E-4	678	-0.00197834305412048	678	-0.00203147982291885
679	9.69488995938406E-4	679	-0.00875024558367432	679	-0.00189587215771425	679	-0.00213441066170539	679	-0.00628569053846206	679	0.00246237008369476	679	0.0129626535057028	679	-0.00501095244779037	679	0.00137894803758343	679	0.00428608288605403	679	8.22026606541293E-4	679	0.00376352280170433	679	0.00483265031925928	679	-0.00779076805588286	679	0.00293937297083602	679	0.0014717860143314	679	-7.26828907486876E-5	679	-0.00247173310887217	679	-0.00265765270429075
680	-1.73406064040371E-4	680	-0.00667751328626665	680	-0.0037700704842738	680	0.00177140355677974	680	-0.00464250130226507	680	0.00249110287910348	680	0.0116082442298593	680	-0.00183188528550282	680	0.00260456550624877	680	4.8123712301873E-4	680	0.00298215029385052	680	0.00658675336439529	680	0.00509903828669867	680	-0.0071332333268801	680	0.00158048280315004	680	0.00146598434089018	680	3.10814824747929E-4	680	-0.0035353030020957	680	-0.00305521919087237
681	-8.27485280689544E-4	681	-0.00473478098885938	681	-0.00494101642112454	681	0.00428577175696265	681	-0.00249892420413911	681	0.00214983567451288	681	0.00906383495401553	681	-8.02818123215587E-4	681	0.00245018297491484	681	-0.00336360864001684	681	0.00562227398116111	681	0.00729998392708708	681	0.00439542625413836	681	-0.00671305328534633	681	-2.42734562073466E-4	681	0.00199463803313993	681	0.00105431254024424	681	-0.00307887289531816	681	-0.00271278567745448
682	1.84355026604521E-5	682	-0.00436204869145218	682	-0.00623731391096261	682	0.00394416552883747	682	-2.06763629313045E-4	682	6.88568469922934E-4	682	0.00489942567817359	682	-8.53750960927435E-4	682	5.8580044357992E-4	682	-0.00481845440305317	682	0.00653239766847058	682	0.0018532144897776	682	0.00434181422157831	682	-0.00652836144422153	682	-0.00126110798051737	682	0.00198717011886629	682	9.78102557409599E-5	682	-0.00317244278854112	682	-0.00182035216403698
683	3.44356286011482E-4	683	-0.00535931639404552	683	-0.00428361140080202	683	0.00302255930071293	683	0.00155539694551354	683	-6.02698734669005E-4	683	5.9501640232984E-4	683	-1.54683798641031E-4	683	-1.9858208775414E-4	683	-0.00375330016608899	683	0.00590252135577973	683	-6.35549475314079E-5	683	0.00298820218901774	683	-0.00584366960309524	683	-7.3948139896185E-4	683	0.00147970220459381	683	4.31307971236805E-4	683	-0.00180601268176428	683	-2.77918650619213E-4
684	8.70277069362047E-4	684	-0.00592186548131313	684	-0.00271990889064089	684	0.0036209530725877	684	6.07557520339697E-4	684	-5.63965939259781E-4	684	-0.00122939287351365	684	5.7438336364779E-4	684	-0.00120296461908875	684	-0.00173814592912525	684	0.00423264504309007	684	-0.00113032438483884	684	0.00337459015645702	684	-0.00509897776197032	684	-0.00129785481740718	684	0.00129223429031988	684	-2.35194313265907E-4	684	-9.79582574987425E-4	684	0.00110451486279928
685	0.00177619785271244	685	-0.0068851912427963	685	-5.26206380480509E-4	685	0.00245934684446247	685	8.39718095166475E-4	685	-8.49912172271594E-4	685	-0.00263415447442483	685	-1.56087088464929E-4	685	-0.00193734715042293	685	0.00121673221009821	685	0.00354310161726712	685	-0.00283314174358651	685	0.0061209408511731	685	-0.00590428592084535	685	-0.00232622823585071	685	3.64766376046433E-4	685	-9.41886739007636E-4	685	-6.13451932220954E-4	685	6.65731619508669E-4
686	0.00311211863606253	686	-0.00702851700428031	686	9.5749612968099E-4	686	0.00159774061633744	686	9.51878669992468E-4	686	-0.00199755597633633	686	-0.00309979688800421	686	0.00126459842342719	686	-0.00275172968175763	686	0.0040709201049669	686	0.00289439040861605	686	-0.00226607890592767	686	0.00762719836407921	686	-0.00617959407972002	686	-0.0041946016542953	686	4.9729846177371E-4	686	-0.00165905451784809	686	-0.00100806994948233	686	1.78906484444852E-4
687	0.00239583545858046	687	-0.00654184276576419	687	0.00340119863984079	687	0.00301613438821224	687	5.04039244819232E-4	687	-0.00295519978040204	687	-0.00206543930158443	687	0.00195528393531852	687	-0.00274611221309229	687	0.0030851079998353	687	0.00317567919996353	687	0.00176098393173163	687	0.00817345587698615	687	-0.00583490223859418	687	-0.00490297507274029	687	8.59830547500273E-4	687	-0.0017262222966874	687	-9.92687966744121E-4	687	-7.77918650618936E-4
688	0.00250294039860144	688	-0.00472516852724869	688	0.00433965899638444	688	0.00323193387929965	688	2.56614540425915E-5	688	-0.00471284358446677	688	-0.00197108171516547	688	0.00222596944721065	688	-0.00130487727576067	688	-0.00114070410529621	688	0.00324696799131097	688	0.00506804676939066	688	0.0082397133898926	688	-0.00638755631803178	688	-0.00455777242333077	688	2.84461621923526E-4	688	-0.00303339007552772	688	-0.00161730598400567	688	-0.0017747437856821
689	0.0023000453386226	689	-0.00340849428873291	689	0.00412811935292723	689	0.00124773337038775	689	0.00271728366326673	689	-0.00485048738853244	689	-0.00350672412874609	689	0.00243665495910239	689	-9.23642338429786E-4	689	-0.00329651621042704	689	0.00209825678265929	689	0.00587510960704929	689	0.00556597090279887	689	-0.0060302103974692	689	-0.00342256977392008	689	-3.70907303653745E-4	689	-0.00311055785436665	689	-0.00154192400126796	689	-0.00192156892074635
690	0.00169715027864381	690	-0.00296441827423788	690	0.00467657970946966	690	0.00163353286147494	690	0.00218890587249021	690	-0.00345813119259653	690	-0.00182236654232693	690	0.00330734047099401	690	1.87592598901887E-4	690	-0.00447232831555855	690	8.79545574006713E-4	690	0.00345217244470852	690	0.00279222841570537	690	-0.00581286447690665	690	-0.00170736712451003	690	3.23723770769391E-4	690	-0.00251772563320607	690	-9.26542018529375E-4	690	-0.00116839405581004
691	0.00100425521866399	691	-0.00235322137284655	691	0.0054150400660129	691	0.00204933235256277	691	0.00157052808171443	691	-0.00159577499666241	691	-5.28008955907211E-4	691	0.00264802598288583	691	0.00150882753623272	691	-0.00691814042068994	691	-0.00164916563464512	691	-6.80764717632343E-4	691	0.00213848592861243	691	-0.00539551855634368	691	-7.52164475100514E-4	691	-5.51645154807545E-4	691	-0.00188489341204612	691	2.68839964209455E-4	691	-8.55219190873058E-4
692	-3.38639841315214E-4	692	-0.00218202447145632	692	0.00364350042255612	692	0.00334513184364926	692	9.92150290938021E-4	692	4.55578409876978E-4	692	-3.6457204446716E-4	692	0.00201103499516719	692	0.00333006247356415	692	-0.00697580381051743	692	-0.00321761500490325	692	-0.00303255494288646	692	0.00286455888725978	692	-0.00438817263578084	692	-6.76961825691436E-4	692	-6.57014080383433E-4	692	-4.27400944262857E-5	692	3.43638431044013E-6	692	-5.35953481458407E-4
693	-7.11534901293831E-4	693	-0.00222082757006525	693	0.00351196077909854	693	0.00413093133473641	693	7.83772500162705E-4	693	0.00261326421995189	693	9.08557975312085E-4	693	3.64818507576636E-4	693	0.00402129741089485	693	-0.00309408429524449	693	-0.00368597709569762	693	-0.0055172961891099	693	0.00222057032782086	693	-0.00402082671521864	693	-7.4175917628061E-4	693	-1.02383005960327E-4	693	9.59186922013799E-4	693	6.67770950199653E-4	693	-0.0016113241572171
694	-0.00178002203960848	694	-0.00241963066867434	694	0.00582831873982581	694	0.00631577367168834	694	-9.74844072465508E-4	694	0.00344095003002565	694	0.00286168799509223	694	5.28602019986835E-4	694	0.00429004769862384	694	-4.22364779971041E-4	694	-0.0040943391864916	694	-0.00696203743533363	694	0.00144658176838153	694	-0.00488672995182782	694	-0.00105917827689606	694	-3.30186820779232E-4	694	0.0021511139384538	694	5.72105516089216E-4	694	-0.00214669483297669
695	-0.00154410125625759	695	-0.00146843376728345	695	0.00700202585365073	695	0.0048594091621208	695	-2.43761717863222E-4	695	0.00225863584010089	695	0.00179481801487125	695	-2.17614467603156E-4	695	0.00233566516728967	695	8.89354735302383E-4	695	-0.00412270127728487	695	-0.00454677868155784	695	1.25932089432013E-5	695	-0.00468672995182828	695	-0.00103033784493434	695	-6.10607133388896E-5	695	0.00214304095489393	695	6.36440081978051E-4	695	-0.00179206550873534
696	-0.00230818047290704	696	-0.00149761352861333	696	0.00682573296747702	696	0.00313304465255282	696	-4.62679363260499E-4	696	0.00104632165017549	696	0.00129794803465177	696	-5.23830955192928E-4	696	0.00182128263595516	696	0.00255107425057588	696	-0.0025410633680778	696	-0.00261151992778075	696	-8.01395350495504E-4	696	-0.00398672995182814	696	-6.41497412972925E-4	696	5.58065394102414E-4	696	0.00120496797133463	696	-5.92253521327635E-5	696	-7.97436184494238E-4
697	-0.00117225968955559	697	-0.00170131324258271	697	0.00675944008130358	697	5.16680142984782E-4	697	1.98402991342661E-4	697	8.24007460249909E-4	697	-0.00103892194556909	697	2.99952557217154E-4	697	3.36900104620952E-4	697	0.00345279376584795	697	-9.89425458872262E-4	697	-0.00173626117400438	697	-7.75383909934924E-4	697	-0.00265672995182786	697	-9.22656981011905E-4	697	3.97191501543048E-4	697	-0.00118310501222574	697	9.0510921375575E-4	697	-8.5280686025424E-4
698	-0.00114633890620564	698	-0.00188501295655108	698	0.00584314719512857	698	-4.59684366583168E-4	698	-1.20514654054382E-4	698	0.00136924556138229	698	-0.00376604843000372	698	4.14311757219288E-4	698	-8.27482426713821E-4	698	0.00297400462422637	698	3.12182108420878E-4	698	-3.96778681556853E-4	698	-0.00122948159837577	698	-0.00317672995182772	698	-0.00149381654904968	698	1.56317608983159E-4	698	-0.00126140015230725	698	9.79224290591496E-4	698	4.63562705266263E-4
699	-3.60418122855144E-4	699	-0.00255871267052044	699	0.00393685430895552	699	-0.00145604887615125	699	-1.59432299452256E-4	699	0.00132550872972814	699	-0.00541411542989234	699	-4.29218188278568E-4	699	-9.51864958047999E-4	699	0.00143335040731785	699	0.00274367842203027	699	0.00162485751935204	699	-0.00129397942649589	699	-0.00275672995182763	699	-0.001674976117088	699	-7.04556283575464E-4	699	-0.00171050986630217	699	8.52534574229402E-4	699	0.00119964648881243
700	-0.00108449733950433	700	-0.00296241238448935	700	-7.94385772184825E-5	700	-5.62413385719829E-4	700	-4.68349944849678E-4	700	0.00130177189807323	700	-0.00428218242978051	700	-0.00100274813377421	700	5.13752510617138E-4	700	-1.67303809588404E-4	700	0.0045251747356394	700	0.00280649372025987	700	0.00144152274538367	700	-0.00271672995182826	700	-0.00268613568512777	700	-0.0014554301761347	700	-0.0016696195802961	700	9.25844857868618E-4	700	4.45730272357281E-4
701	-1.41600316371004E-4	701	-0.00309611209845873	701	-0.00144820919087696	701	-1.00592342767492E-4	701	2.24142240146108E-6	701	0.00143803506641849	701	-0.00344024942966925	701	-0.00127627807927144	701	0.00148433927848668	701	-6.4795802649531E-4	701	0.00455667104924906	701	0.00381812992116792	701	0.00242702491726376	701	-0.00307322826617185	701	-0.00370823913962948	701	-9.0110642912844E-4	701	-3.08729294291155E-4	701	0.00118915514150686	701	-6.38185944097813E-4
702	-4.39711213309657E-4	702	-0.00252981181242795	702	-0.00309338994290354	702	0.0012209920331232	702	-8.07231252176521E-4	702	0.00223429823476362	702	-0.0012583164295572	702	-0.0026598080247684	702	0.00217557421581827	702	-0.00210861224340331	702	0.00345816736285798	702	0.00503976612207602	702	0.00312252708914418	702	-0.00404057418673442	702	-0.00357046570975772	702	2.25909230389121E-5	702	0.00153216099171338	702	6.42465425144678E-4	702	-9.82102160551612E-4
703	-0.00195782211025008	703	-0.00159644412076165	703	-0.0116885706949299	703	9.62576409012428E-4	703	-0.00579670392675435	703	-0.00258943859689076	703	-0.00491638342944611	703	-0.006633337970265	703	0.00385680915314968	703	-0.0097792664603098	703	-6.03363235320842E-5	703	0.00115140232298483	703	0.00285802926102363	703	-8.57920107296906E-4	703	-0.00223269227988609	703	0.00189628827520671	703	0.00347305127771858	703	4.7577570878321E-4	703	-0.00377601837700681
704	-0.0051059330071892	704	-6.44597283248061E-5	704	-0.026393751446955	704	-0.00238583921509772	704	-0.0172161766013321	704	-0.0152031754285451	704	-0.0163344504293335	704	-0.0159568679157625	704	0.00403804409048103	704	-0.0229499206772177	704	-0.0100888400099235	704	-0.00864696147610644	704	-0.00324646856709609	704	0.00270473397214044	704	-6.34918850014543E-4	704	0.00727998562737309	704	0.0094639415637241	704	1.99085992422354E-4	704	-0.00638993459346171
705	-0.0107840439041285	705	-2.82475335887433E-4	705	-0.0425889321989814	705	-0.00942425483920672	705	-0.03393564927591	705	-0.0371132923886908	705	-0.036723322959908	705	-0.0358090579752739	705	8.8927902781144E-4	705	-0.0443021122937477	705	-0.027537226803922	705	-0.0275353252751982	705	-0.020261512426381	705	0.00435738805157726	705	2.2285457985749E-4	705	0.0106236829795412	705	0.0207140140795348	705	-0.00324829403553473	705	-0.00933269490730115
706	-0.0192621548010674	706	-8.04909434508616E-5	706	-0.0615541129510078	706	-0.0214826704633175	706	-0.0575351219504876	706	-0.0672164315149626	706	-0.0659025770576491	706	-0.0659806133519512	706	-0.00562948603485669	706	-0.0772650321522068	706	-0.0529755582278408	706	-0.0550736890742902	706	-0.045006814932008	706	0.00357004213101497	706	1.40628009728694E-4	706	0.00976738033170843	706	0.0316336992305155	706	-0.0104160010531951	706	-0.0159880655830609
707	-0.0269802656980067	707	8.21493448986743E-4	707	-0.0812726841279092	707	-0.0400717490913882	707	-0.0873147809349764	707	-0.104659570641234	707	-0.10209183115539	707	-0.103142168728628	707	-0.0149982510975253	707	-0.119557952010664	707	-0.082793889651759	707	-0.0934520528733822	707	-0.0779621174376333	707	-0.00168088672906297	707	-0.00266797684705455	707	0.00396930296459708	707	0.0397133843814972	707	-0.0219837080708549	707	-0.0263534362588196
708	-0.032867006348563	708	7.53477841423766E-4	708	-0.096908235591318	708	-0.0610721927276154	708	-0.120014823498694	708	-0.140912709767506	708	-0.13693108525313	708	-0.141383724105306	708	-0.0285870161601949	708	-0.161790871869123	708	-0.113752221075677	708	-0.134770416672473	708	-0.115637419943259	708	-0.0106774275234365	708	-0.0082073605293056	708	-0.00748242823632417	708	0.0398530695324792	708	-0.0367014150885154	708	-0.03840880693458
709	-0.0361037469991192	709	-1.85591276141928E-4	709	-0.105923787054727	709	-0.0808626363638414	709	-0.14842486606241	709	-0.169895848893778	709	-0.165440339350871	709	-0.175865279481982	709	-0.043855781222863	709	-0.198373791727581	709	-0.140520552499595	709	-0.174368780471565	709	-0.152972722448887	709	-0.0232239683178097	709	-0.0144567442115555	709	-0.0289241594372465	709	0.0244527546834599	709	-0.0579091221061763	709	-0.0540741776103388
710	-0.0355404876496754	710	1.12657944466577E-4	710	-0.111379338518136	710	-0.0957930800000684	710	-0.169014908626127	710	-0.185648988020049	710	-0.184099593448612	710	-0.196856834858659	710	-0.056874546285532	710	-0.221776711586038	710	-0.160498883923514	710	-0.209897144270657	710	-0.186808024954512	710	-0.037740509112183	710	-0.0211661278938067	710	-0.0579658906381679	710	-0.0102275601655588	710	-0.0818268291238367	710	-0.0750595482860978
711	-0.0330972283002318	711	2.60907165076318E-4	711	-0.114614889981544	711	-0.101113523636296	711	-0.179794951189844	711	-0.186073194444388	711	-0.191119015801887	711	-0.200128209911377	711	-0.0652333113482007	711	-0.227319949933117	711	-0.171227139182055	711	-0.237349719854383	711	-0.212053483174764	711	-0.0530270499065555	711	-0.0251655115760574	711	-0.0882476218390895	711	-0.0563480713688147	711	-0.103714680720229	711	-0.0949449189618568
712	-0.0293139689507873	712	-5.70843614315031E-4	712	-0.115140441444953	712	-0.0962439672725228	712	-0.178844993753562	712	-0.172733804657122	712	-0.184649447688374	712	-0.187378503020341	712	-0.0687920764108698	712	-0.21550509921191	712	-0.172564937448336	712	-0.252367566145923	712	-0.226549875682768	712	-0.063313590700929	712	-0.0273348952583081	712	-0.11184935304001	712	-0.102709760697498	712	-0.121693399789014	712	-0.110660289637615
713	-0.0227007096013443	713	-0.00120259439370507	713	-0.114035992908362	713	-0.0836144109087495	713	-0.167245036317278	713	-0.151404414869858	713	-0.169409879574861	713	-0.164108796129304	713	-0.0681908414735384	713	-0.192080248490703	713	-0.167502735714617	713	-0.254795412437462	713	-0.231796268190772	713	-0.0705201314953019	713	-0.0274542789405592	713	-0.128161084240932	713	-0.13888145002618	713	-0.135722118857799	713	-0.120875660313375
714	-0.0137085472749598	714	-7.04345173097032E-4	714	-0.109987499312359	714	-0.0675663974389318	714	-0.151005528689086	714	-0.127935025082592	714	-0.149240311461348	714	-0.136329089238267	714	-0.0640496065362068	714	-0.164945397769498	714	-0.156460533980898	714	-0.245433258729001	714	-0.228222660698775	714	-0.0735166722896752	714	-0.0264793133309347	714	-0.134816994341344	714	-0.156913139354864	714	-0.142120837926584	714	-0.127081030989134
715	-0.00322967601775748	715	-6.86095952487698E-4	715	-0.106153792198533	715	-0.0525388468373009	715	-0.134986156003321	715	-0.108025635295328	715	-0.128130743347834	715	-0.108949382347231	715	-0.0589383715988765	715	-0.138440547048292	715	-0.140928332247179	715	-0.22759110502054	715	-0.21446905320678	715	-0.0717532130840493	715	-0.0251260429337483	715	-0.130934158111604	715	-0.153414828683547	715	-0.14123955699537	715	-0.125076401664893
716	0.0080391952394443	716	-0.00105063720693455	716	-0.100980085084707	716	-0.04354129623567	716	-0.119836783317556	716	-0.0961362455080623	716	-0.107981175234321	716	-0.0883596754561946	716	-0.0540271366615457	716	-0.115615696327086	716	-0.12212613051346	716	-0.204548951312079	716	-0.196895445714783	716	-0.0652097538784231	716	-0.0251527725365612	716	-0.121101321881864	716	-0.13543651801223	716	-0.136998276064155	716	-0.119321772340653
717	0.0172380664966463	717	-9.05542436386853E-4	717	-0.0923163779708807	717	-0.0390837456340396	717	-0.10775741063179	717	-0.0901768557207978	717	-0.0932116071208071	717	-0.0769099685651584	717	-0.0494959017242138	717	-0.0976508456058793	717	-0.106583928779742	717	-0.179576797603619	717	-0.180061838222787	717	-0.0575562946727954	717	-0.024639502139375	717	-0.113898485652125	717	-0.112228207340912	717	-0.130296995132941	717	-0.112577143016412
718	0.0237269377538487	718	-6.00447665840775E-4	718	-0.0805426708570547	718	-0.0388161950324086	718	-0.0964080379460253	718	-0.086090829431078	718	-0.084052748441362	718	-0.071109927765824	718	-0.0467146667868832	718	-0.0847673264698532	718	-0.0915511842282486	718	-0.158694093514007	718	-0.162959065750906	718	-0.0502628354671693	718	-0.0247762317421882	718	-0.108215649422384	718	-0.0923708339914953	718	-0.121096325473733	718	-0.106122513692171
719	0.0261258090110514	719	-0.00107535289529448	719	-0.073758963743229	719	-0.0411186444307781	719	-0.0865286652602597	719	-0.0817869795221213	719	-0.0774143488074888	719	-0.0677796709081804	719	-0.0439734318495519	719	-0.0750946689477683	719	-0.0797780884417261	719	-0.142419268589532	719	-0.148046833586157	719	-0.0429393762615424	719	-0.0244829613450017	719	-0.104842813192644	719	-0.0794840671444836	719	-0.110076051343471	719	-0.0987178843679306
720	0.0253946802682536	720	-0.00190025812474737	720	-0.0675008690207406	720	-0.0434615134182597	720	-0.0758594194154725	720	-0.0767531296131656	720	-0.0732459491736162	720	-0.0669294140505361	720	-0.0405810086015421	720	-0.0688420114256836	720	-0.0714149926552041	720	-0.128674443665057	720	-0.134804601421409	720	-0.0361476722821967	720	-0.0237396909478145	720	-0.102251127009855	720	-0.0749573002974708	720	-0.100665777213209	720	-0.0920032550436893
721	0.0229835515254555	721	-0.00164516335420117	721	-0.0577264204841494	721	-0.0456159463287982	721	-0.0666706463416027	721	-0.0682192797042092	721	-0.0710275495397426	721	-0.0667491571928922	721	-0.0388841561955449	721	-0.065009353903597	721	-0.0656118968686821	721	-0.117879618740584	721	-0.12274236925666	721	-0.0305070559644474	721	-0.0225664205506275	721	-0.0996737273657038	721	-0.0738005334504583	721	-0.0908255030829466	721	-0.0860086257194492
722	0.0216224227826576	722	-0.00201132245128566	722	-0.0479919719475586	722	-0.0469703792393359	722	-0.0588518732677326	722	-0.0602954297952536	722	-0.0688491499058692	722	-0.0646889003352484	722	-0.039217303789548	722	-0.0602966963815126	722	-0.059388801082159	722	-0.108684793816109	722	-0.112440137091912	722	-0.0282164396466982	722	-0.0206031501534412	722	-0.0955763277215524	722	-0.0753637666034459	722	-0.0807752289526844	722	-0.0799139963952076
723	0.0192712940398598	723	-0.00191880140903677	723	-0.0425075234109666	723	-0.0444748121498737	723	-0.0511031001938624	723	-0.0542615798862975	723	-0.0625307502719963	723	-0.0613386434776046	723	-0.0376604513835508	723	-0.0533740388594275	723	-0.0546557052956373	723	-0.0988999688916348	723	-0.103407904927164	723	-0.0266558233289489	723	-0.0179598797562557	723	-0.0906889280774017	723	-0.0758269997564343	723	-0.0732749548224216	723	-0.0735193670709675
724	0.0169601652970623	724	-0.00269628036678693	724	-0.0374330748743752	724	-0.0404292450604125	724	-0.0452543271199923	724	-0.0497479877394955	724	-0.0567024334360191	724	-0.0574083982152818	724	-0.0361735989775553	724	-0.0447215354071915	724	-0.0485625198699742	724	-0.0902093437977589	724	-0.092515791380424	724	-0.0272752070111997	724	-0.0163466093590685	724	-0.0829715284332497	724	-0.0740603552786325	724	-0.0670947522315011	724	-0.0670452951888105
725	0.0144990365542652	725	-0.00198375932453665	725	-0.0331986263377848	725	-0.03613367797095	725	-0.0416555540461223	725	-0.0441977465006946	725	-0.0514851929726792	725	-0.0528883036921375	725	-0.0349567465715586	725	-0.0359010348630111	725	-0.0425781691354841	725	-0.0821833165016779	725	-0.0839052198677948	725	-0.0289645906934499	725	-0.0145233389618822	725	-0.0758641287890995	725	-0.0697753016005658	725	-0.0601754796520186	725	-0.0601584700537474
726	0.0129979078114664	726	-0.00102123828228695	726	-0.0300541778011931	726	-0.0293181108814879	726	-0.0385067809722521	726	-0.0409775052618926	726	-0.0460779525093393	726	-0.0476782091689918	726	-0.0321698941655617	726	-0.0274805343188307	726	-0.0365738184009938	726	-0.0755872892055969	726	-0.0776646483551655	726	-0.0307239743757011	726	-0.0126300685646958	726	-0.0683867291449474	726	-0.0650802479224994	726	-0.0546262070725358	726	-0.0527316449186825
727	0.0122367790686688	727	7.5128275996228E-4	727	-0.0301365101143523	727	-0.0224838261557681	727	-0.0349584096693683	727	-0.0378772640230922	727	-0.0409507120460004	727	-0.0444181146458469	727	-0.0295467147198458	727	-0.0223600337746506	727	-0.0323694676665029	727	-0.0686812619095161	727	-0.0685340768425364	727	-0.0306081611598579	727	-0.012066798167508	727	-0.0613728868173835	727	-0.0592451942444319	727	-0.0497369344930529	727	-0.0451548197836189
728	0.0115556503258718	728	8.13624925159573E-4	728	-0.0296024322891437	728	-0.018750220328501	728	-0.0331602510687707	728	-0.033627022784291	728	-0.0371134715826607	728	-0.0412680201227023	728	-0.0270954797825143	728	-0.0205795332304692	728	-0.0293151169320112	728	-0.0617052346134352	728	-0.0621035053299073	728	-0.0305248907626714	728	-0.0126135277703217	728	-0.0544609277750698	728	-0.0537701405663649	728	-0.0449276619135697	728	-0.0394279946485554
729	0.0117145215830741	729	0.0016541527659637	729	-0.0299283544639355	729	-0.0167966145012333	729	-0.0309620924681742	729	-0.0286467815454898	729	-0.033646231119322	729	-0.0372979255995576	729	-0.0250742448451842	729	-0.0185490326862885	729	-0.0274407661975218	729	-0.0571392073173547	729	-0.054432933817278	729	-0.029711620365485	729	-0.013450257373135	729	-0.0498789687327577	729	-0.0488250868882991	729	-0.0398983893340867	729	-0.0346311695134922
730	0.0121933928402758	730	4.84680606768428E-4	730	-0.0263142766387272	730	-0.0148230086739662	730	-0.0283439338675766	730	-0.0270065403066893	730	-0.0303889906559824	730	-0.0343278310764132	730	-0.0230430099078527	730	-0.0155185321421083	730	-0.0251864154630308	730	-0.0503831800212735	730	-0.0475023623046482	730	-0.0262683499682987	730	-0.0144069869759482	730	-0.0455070096904446	730	-0.0445600332102316	730	-0.0358891167546043	730	-0.0307943443784282
731	0.0117122640974783	731	-2.47915524269615E-5	731	-0.0270501988135186	731	-0.0162894028466987	731	-0.0245857752669796	731	-0.0251571977082454	731	-0.0272823661898371	731	-0.0319782051080564	731	-0.0225517749705206	731	-0.0139591677175837	731	-0.0227611990982899	731	-0.0399637966451225	731	-0.0400116819399177	731	-0.0217050795711122	731	-0.0144537165787622	731	-0.0420350506481322	731	-0.0402259880215858	731	-0.0330103779075888	731	-0.0270889878245351
732	0.00928113535468089	732	-0.00156426371162421	732	-0.0292861209883091	732	-0.0191557970194314	732	-0.0218676166663831	732	-0.0238086339314458	732	-0.0241362755879244	732	-0.0279089852205168	732	-0.0199205400331897	732	-0.0122207879300928	732	-0.0199952325206647	732	-0.0311995046662492	732	-0.0370329072366982	732	-0.0176418091739254	732	-0.0142104461815755	732	-0.0368630916058192	732	-0.037092816857105	732	-0.0309521016287126	732	-0.0248129040409895
733	0.00662000661188156	733	-0.00174373587081966	733	-0.0286690516117405	733	-0.0213223776356468	733	-0.0188495185787332	733	-0.0228700701546458	733	-0.0222301849860136	733	-0.0248097653329777	733	-0.0178387649546403	733	-0.0118824081426014	733	-0.0153392659430409	733	-0.0251352126873767	733	-0.0318941325334787	733	-0.0145100627145505	733	-0.0121863581850921	733	-0.0333216560844773	733	-0.0337696456926242	733	-0.0279538253498357	733	-0.0225868202574446
734	0.0042688778690847	734	-0.00195320803001486	734	-0.0254638616523835	734	-0.0206107108206002	734	-0.0159019893127867	734	-0.0212315063778465	734	-0.0206440943841013	734	-0.0229205454454382	734	-0.0160819125486444	734	-0.0139040283551113	734	-0.0108032993654161	734	-0.0169409207085041	734	-0.0302453578302595	734	-0.010658641270612	734	-0.0110285847552198	734	-0.0292351416602523	734	-0.0319664745281436	734	-0.0257355490709594	734	-0.0196907364738994
735	0.00276951544346815	735	1.3635870699602E-4	735	-0.0238886716930269	735	-0.0198790440055534	735	-0.0142944600468411	735	-0.0178229426010468	735	-0.01811800378219	735	-0.0209313255578989	735	-0.0135650601426471	735	-0.0160556485676207	735	-0.00624733278779122	735	-0.0125266287296304	735	-0.0285165831270406	735	-0.00848721982667389	735	-0.00936081132534827	735	-0.0252986272360287	735	-0.0300533033636619	735	-0.0228872727920839	735	-0.0174246526903552
736	0.00201015301785201	736	1.54982867668352E-5	736	-0.0225134817336707	736	-0.0173473771905064	736	-0.0135769307808955	736	-0.0154443788242462	736	-0.0147619131802772	736	-0.0195121056703593	736	-0.0115082077366502	736	-0.0169872687801309	736	-0.00436136621016558	736	-0.0103023367507573	736	-0.026807808423821	736	-0.00774579838273404	736	-0.00792303789547688	736	-0.0218621128118048	736	-0.0287901321991813	736	-0.0193589965132066	736	-0.0141885689068095
737	0.00219079059223581	737	1.94637866537839E-4	737	-0.0194282917743154	737	-0.0138057103754594	737	-0.0123794015149494	737	-0.0112858150474473	737	-0.0139158225783662	737	-0.0175728857828199	737	-0.0114413553306534	737	-0.0171488889926392	737	-0.00340539963254205	737	-0.00613804477188573	737	-0.0251190337206015	737	-0.00716437693879612	737	-0.00634526446560457	737	-0.0196555983875806	737	-0.0268669610346999	737	-0.0161707202343306	737	-0.0112324851232648
738	0.00302142816661899	738	3.1377744630845E-4	738	-0.0192031018149583	738	-0.0119440435604119	738	-0.0118718722490039	738	-0.00860699752449445	738	-0.0128808725287763	738	-0.0158952528319922	738	-0.0112145029246573	738	-0.0141225937406224	738	-0.00479745631661821	738	-0.00176228394860622	738	-0.0222484184129312	738	-0.00530295549485782	738	-0.00611749103573356	738	-0.0173190839633559	738	-0.025365841728445	738	-0.0140434350058882	738	-0.00801785579902337
739	0.00308206574100289	739	2.92917026079031E-4	739	-0.0214079118556016	739	-0.0120623767453658	739	-0.0116443429830575	739	-0.007818180001542	739	-0.0119359224791857	739	-0.0141876198811639	739	-0.0104276505186611	739	-0.0109362984886063	739	-0.0058395130006943	739	-0.00733652312532573	739	-0.0177978031052621	739	-0.00400153405091785	739	-0.00484971760586106	739	-0.014892569539132	739	-0.0242547224221905	739	-0.014496149777445	739	-0.00685322647478248
740	0.0024127033153869	740	-0.0011379433941503	740	-0.0225664853343348	740	-0.0116517420330675	740	-0.00940716059189661	740	-0.00705936247858929	740	-0.0127009724295961	740	-0.0132299869303365	740	-0.00953079811266377	740	-0.00849000323658977	740	-0.00663156968476919	740	-0.0271007623020463	740	-0.0145271877975928	740	-0.00236153405091777	740	-0.00399052273205136	740	-0.0125689889949365	740	-0.0238336031159356	740	-0.0145288645490034	740	-0.00637859715054212
741	0.00273789931047563	741	-0.00113901473615918	741	-0.019336856045717	741	-0.0106619919802666	741	-0.00792027552197982	741	-0.00646054495563675	741	-0.0144660223800059	741	-0.0119023539795089	741	-0.00887394570666711	741	-0.00739370798457362	741	-0.00574362636884551	741	-0.0588850014787665	741	-0.0119065724899237	741	-0.00264560957429438	741	-0.00384725233486449	741	-0.0108579232050507	741	-0.0231924838096811	741	-0.0138515793205602	741	-0.00655396782630113
742	0.00216677056767711	742	-9.20590456336967E-4	742	-0.0146972267571002	742	-0.0112722419274673	742	-0.00736339045206336	742	-0.00801172743268452	742	-0.0143610723304155	742	-0.0106847210286807	742	-0.00840709330067035	742	-0.00621741273255694	742	-0.00357568305292144	742	-0.0956792406554863	742	-0.00904595718225387	742	-0.00303968509767039	742	-0.00346398193767783	742	-0.00997685741516552	742	-0.0215513645034271	742	-0.0128242940921171	742	-0.00653933850205934
743	0.00126564182487954	743	-0.00180216617651308	743	-0.0108375974684831	743	-0.0102024918746668	743	-0.00763650538214655	743	-0.00977290990973145	743	-0.0133461222808258	743	-0.00939708807785333	743	-0.00774024089467407	743	-0.00457111748054029	743	-8.57739736996876E-4	743	-0.128123479832206	743	-0.00807534187458536	743	-0.00335376062104675	743	-0.0032807115404907	743	-0.00825579162527923	743	-0.020710245197173	743	-0.0125070088636745	743	-0.00656470917781959
744	9.74513082081963E-4	744	-0.00177374189668988	744	-0.00573796817986505	744	-0.00836274182186703	744	-0.00711962031222946	744	-0.0114430779437074	744	-0.0132398507100104	744	-0.00952052263029746	744	-0.00772338848867715	744	-0.00337577323157312	744	-3.87110912498656E-5	744	-0.146320420110031	744	-0.00860855123899196	744	-0.00270783614442305	744	-0.00312744114330421	744	-0.00750472583539441	744	-0.0192501571636781	744	-0.0107301813282099	744	-0.00606007985357859
745	9.23384339283295E-4	745	-0.00166531761686706	745	5.7166110875162E-4	745	-0.00779299176906623	745	-0.00639273524231232	745	-0.0138720754664474	745	-0.0121566696916293	745	-0.0087651889172875	745	-0.00938653608268059	745	-0.00197152629381492	745	-4.18430141860604E-4	745	-0.145215861658357	745	-0.00814617368656556	745	-0.00338191166779822	745	-0.00256417074611726	745	-0.00652366004550942	745	-0.0176212590602898	745	-0.00937388190002775	745	-0.00532545052933742
746	-2.07744403513566E-4	746	-0.00123689333704391	746	0.00358129039736976	746	-0.00761324171626754	746	-0.0058658501723956	746	-0.0135210729891879	746	-0.0106134886732487	746	-0.00774985520427762	746	-0.00929968367668366	746	2.82720643942191E-4	746	-0.0018081491924713	746	-0.132311303206683	746	-0.00965379613413919	746	-0.00158598719117453	746	-0.00265090034893145	746	-0.00500259425562355	746	-0.0152823609569026	746	-0.00895758247184553	746	-0.00511082120509698
747	6.21126853688203E-4	747	-0.00129846905721998	747	0.00173109093046975	747	-0.00456534974281109	747	-0.00486961148570497	747	-0.0119300705119283	747	-0.00918030765486577	747	-0.00863452149126775	747	-0.00838283127068618	747	0.00122696758170004	747	-0.00258786824308288	747	-0.118196744755009	747	-0.010431418581712	747	3.90721454159859E-5	747	-0.00347762995174428	747	-0.00135687625766145	747	-0.0145134628535146	747	-0.00796128304366395	747	-0.00389619188085533
748	0.00100823179370924	748	-0.00116998501628363	748	4.00698742873296E-4	748	-0.0040174942022837	748	-0.00409338547319393	748	-0.00971906803466815	748	-0.00961712663648484	748	-0.0108391877782577	748	-0.00814597886469048	748	-7.18785480542827E-4	748	-0.00295758729369311	748	-0.105362186303335	748	-0.0118590410292851	748	0.00113215373416242	748	-0.00353435955455783	748	0.00346873688163551	748	-0.0135945647501261	748	-0.00678498361548119	748	-0.00363156255661501
749	0.00171357041654829	749	-7.71494145505258E-4	749	0.00111030655527689	749	-0.00432963866175662	749	-0.00480715946068422	749	-0.00878806555740841	749	-0.00907394561810371	749	-0.0120438540652481	749	-0.00763912645869347	749	-0.00203453854278557	749	-0.00211730634430385	749	-0.0980776278516613	749	-0.013736663476859	749	0.0013352353229088	749	-0.00345108915737136	749	0.0081843500209331	749	-0.0125656666467382	749	-0.00606868418729878	749	-0.00277693323237393
750	0.0023889090393876	750	4.36996725273531E-4	750	-0.00122008563231901	750	-0.00298178312122843	750	-0.00719093344817434	750	-0.00725706308014917	750	-0.00773076459972266	750	-0.0118685203522384	750	-0.00548227405269675	750	-0.00434029160502813	750	-2.67025394914633E-4	750	-0.0946230693999883	750	-0.0145142859244327	750	0.00187831691165563	750	-0.00408781876018516	750	0.0133399631602291	750	-0.0122667685433511	750	-0.00519238475911621	750	-0.00230230390813357
751	0.0022042476622266	751	1.95487596052146E-4	751	-0.00460047781991602	751	-0.00124392758070169	751	-0.00851470743566374	751	-0.00621223845203289	751	-0.00663136661572228	751	-0.0119259830682292	751	-0.00481542164669957	751	-0.00439791303938275	751	0.00157576133105941	751	-0.0915360429509109	751	-0.0138013498460072	751	0.00167139850040243	751	-0.00265454836299828	751	0.0180755762995259	751	-0.0117000902340765	751	-0.00482699584173041	751	-0.00217042783680022
752	0.00108958628506706	752	7.03978466829902E-4	752	-0.00368087000751149	752	-0.00175607204017325	752	-0.00932848142315379	752	-0.00708711981231236	752	-0.00461764424975275	752	-0.0114836608941431	752	-0.00408856924070289	752	-0.00237567819466911	752	0.0024487408090792	752	-0.0890411343481867	752	-0.0135260631117351	752	3.14480089148361E-4	752	-0.00253127796581154	752	0.0197611894388228	752	-0.0107335826781965	752	-0.00475167696363599	752	-0.00309799432338131
753	2.64924907906305E-4	753	0.00193246933760882	753	-0.00416356415285968	753	-9.89008610618569E-4	753	-0.00838254053012921	753	-0.00657200117259116	753	-0.00195392188378207	753	-0.0101513387200578	753	-0.00330409345606508	753	-0.00127344334995527	753	0.00168172028709712	753	-0.0885662257454616	753	-0.0117507763774629	753	-3.47410853844821E-5	753	-0.00207760500553089	753	0.0192344939883045	753	-0.00936707512231649	753	-0.00442635808554126	753	-0.00355556080996333
754	-0.00105973646925506	754	0.00225143048734822	754	-0.00977757914968436	754	-0.00122302533239083	754	-0.00601698843640452	754	-0.00503688253287038	754	0.00132980048218734	754	-0.00753901654597122	754	-0.00230285851873369	754	-3.21208505241977E-4	754	1.1469976511691E-4	754	-0.0872613171427359	754	-0.00684548964319109	754	-3.08011482571757E-4	754	-0.00208883764102907	754	0.0182046504607625	754	-0.007310567566436	754	-0.00361103920744643	754	-0.0044731272965457
755	-0.00118807310852898	755	0.00213086191604805	755	-0.0212915941465095	755	-0.00117704205416214	755	-0.00208143634267888	755	-0.00291176389314973	755	0.00332352284815762	755	-0.00561669437188606	755	-0.00188162358140254	755	0.00134102633947197	755	-0.00138232075686329	755	-0.0827264085400108	755	-0.00341020290891869	755	5.18718120241957E-4	755	-0.00132007027652836	755	0.0158048069332208	755	-0.00544406001055631	755	-0.0035257203293515	755	-0.00403069378312626
756	-7.50968168508059E-4	756	0.00278029334474716	756	-0.0331156091433353	756	-3.31058775932647E-4	756	0.00944411575104631	756	-0.00182664525342879	756	0.00320724521412696	756	-0.00347437219780034	756	-0.00115038864407158	756	0.0028032611841855	756	-0.00206934127884395	756	-0.0773414999372859	756	1.95083825352604E-4	756	5.54477230556572E-5	756	-0.00228130291202611	756	0.0133049634056794	756	-0.00436755245467602	756	-0.00261040145125691	756	-0.00339826026970869
757	-5.23863228488075E-4	757	0.00222972477344641	757	-0.0421896241401596	757	3.64924502295416E-4	757	0.0229496678447711	757	2.80849100039227E-4	757	0.00244096758009782	757	-0.00218351296086894	757	-0.00103915370673935	757	0.00244471979353822	757	-0.00244515988433403	757	-0.0690481408687091	757	0.00432920569148365	757	8.62177325868352E-4	757	-0.00287253554752542	757	0.0112551198781379	757	-0.00337205057071088	757	-0.00237546572670055	757	-0.00133764291680105
758	6.73241711532491E-4	758	0.00124915620214505	758	-0.0425336391369848	758	-9.89092219476184E-4	758	0.0342752199384977	758	2.12015011116229E-4	758	-4.75310053932532E-4	758	-6.14914626814844E-4	758	-9.87918769409291E-4	758	0.0041949787664235	758	-0.00129912098251861	758	-0.0637726310801812	758	0.00700334548866799	758	0.0010389069286818	758	-0.00313376818302302	758	0.0100752763505971	758	-0.0033781029069786	758	-0.00281112214852008	758	-2.49832357408053E-4
759	0.00138034665155296	759	-1.11412369154351E-4	759	-0.0349576541338106	759	-7.13108941248208E-4	759	0.0423607720322225	759	8.83180922194526E-4	759	-0.00507158768796234	759	-0.00136631629275907	759	-9.76683832077718E-4	759	0.00746523773930985	759	-7.3082080703557E-5	759	-0.0579171212916529	759	0.00582748528585153	759	0.00123563653149539	759	-0.00314500081852209	759	0.00983543282305543	759	-0.00405415524324582	759	-0.0023867785703402	759	9.47978201984334E-4
760	0.00176745159157399	760	-2.01809218396853E-4	760	-0.019313201460756	760	0.00100127336477751	760	0.0460357280661921	760	1.64346833271267E-4	760	-0.00769786532199301	760	-0.00167771795870397	760	-0.00128058762378558	760	0.00996549671219515	760	6.2295682111202E-4	760	-0.0536916115031252	760	0.00441162508303616	760	7.69724527978966E-4	760	-0.00343887506035045	760	0.00918086370437887	760	-0.00400020757951403	760	-0.00206243499216097	760	0.00109578876137562
761	0.00195455653159549	761	-2.90703499628897E-4	761	-0.00383898715016517	761	0.00135540663068134	761	0.0399905913797545	761	4.15512744349478E-4	761	-0.00858414295602206	761	-0.00301911962464896	761	-0.00163373521778887	761	0.00886575568508086	761	3.58995722926636E-4	761	-0.0507861017145972	761	0.00454576488021896	761	9.7095716347706E-4	761	-0.00331560466316372	761	0.00883555949374859	761	-0.00377625991578157	761	-0.00231809141398109	761	8.8359932076898E-4
762	8.28128837252251E-4	762	5.90402219138753E-4	762	0.00809522716042554	762	0.0017195398965848	762	0.0298754546933164	762	3.56678655426101E-4	762	-0.00872042059005285	762	-0.00397052129059361	762	-0.00225688281179171	762	0.00666601465796646	762	-0.00123496537525902	762	-0.0486905919260687	762	0.00590990467740315	762	0.00125218979897657	762	-0.00195233426597685	762	0.0100302552831195	762	-0.00407231225204896	762	-0.00223374783580077	762	-3.88590119839272E-4
763	-1.18298857088917E-4	763	0.0027615079379073	763	0.0119994414710156	763	0.00259367316248937	763	0.0199803180068798	763	9.67844566504006E-4	763	-0.0071766982240824	763	-0.00434192295653801	763	-0.00292003040579569	763	0.00224627363085261	763	-0.00301892647344282	763	-0.0420150821375413	763	0.008594044474588	763	7.83422434474268E-4	763	-0.00101906386879058	763	0.0102349510724897	763	-0.00434836458831622	763	-0.00181940425762139	763	-0.0011507795604464
764	-2.54726551431439E-4	764	0.00433261365667548	764	0.010073655781607	764	0.003797806428393	764	0.0126451813204431	764	8.35738459367796E-4	764	-0.00410689653410401	764	-0.0031471270291723	764	-0.00301317799979905	764	-0.00139512995393076	764	-0.00364995586966099	764	-0.0382918097357257	764	0.00901639214192418	764	0.00143465506997398	764	-0.00101579347160374	764	0.00905964686185978	764	-0.00431675627040296	764	-0.00249589215064816	764	-0.00153855358169963
765	-2.11542457728697E-5	765	0.00470371937544378	765	-0.00102212990780259	765	0.00247193969429738	765	0.00879004463400523	765	9.94753682530103E-4	765	-0.00229774829012364	765	-0.0046129648362534	765	-0.00424632559380189	765	-0.00300681063165786	765	-0.00437049664888445	765	-0.0372122435650279	765	0.00887344112095434	765	0.00207588770547229	765	-0.00172252307441756	765	0.00899434265122956	765	-0.00473553784345881	765	-0.00259251862221088	765	-0.00112559169972659
766	-8.8758194011529E-4	766	0.00418482509421203	766	-0.0124384869153582	766	5.25510571786292E-4	766	0.00557469144247857	766	-1.26231094308871E-4	766	3.61399953856534E-4	766	-0.00446880264333505	766	-0.00435947318780539	766	-0.00279849130938548	766	-0.00315103742810763	766	-0.0355826773943297	766	0.00529049009998239	766	0.00247547637547019	766	-0.00244151296048134	766	0.00947735699464847	766	-0.00494431941651463	766	-0.00251914509377293	766	-7.72629817754833E-4
767	-9.24009634457157E-4	767	0.00378748250799621	767	-0.0207061293887438	767	-0.00175218392466103	767	0.00502885111450091	767	-1.27215871146724E-4	767	8.70548197836385E-4	767	-0.0024946404504167	767	-0.00316262078180785	767	-0.0024701719871123	767	-0.00121157820733053	767	-0.0331331112236306	767	-2.32460920988053E-4	767	1.13866123091277E-4	767	-0.00254558848385766	767	0.00800658808468047	767	-0.00473310098957125	767	-0.00242577156533486	767	-0.00153966793578242
768	-8.70437328799767E-4	768	0.00100078881242371	768	-0.0218437718621303	768	-0.00184987842110829	768	0.00495301078652322	768	-2.78200647985116E-4	768	0.00210969644181525	768	-0.00136047825749852	768	-0.00149576837581211	768	5.7814733516004E-4	768	-4.72118986555081E-4	768	-0.0325235450529338	768	-0.0054454119419578	768	-3.6774412928775E-4	768	-0.00336966400723338	768	0.0068558191747119	768	-0.00309188256262694	768	-0.00234239803689729	768	-0.00122670605380915
769	-6.6686502314095E-4	769	1.44095116850984E-4	769	-0.0176114143355157	769	-0.00127757291755604	769	0.0055971704585458	769	6.10814575177088E-4	769	0.00229884468579566	769	-0.00196631606457931	769	-6.88915969814907E-4	769	9.76466657433228E-4	769	1.17340234222496E-4	769	-0.0306839788822346	769	-0.00462836296292846	769	0.00124064561833315	769	-0.00261373953060939	769	0.00768505026474386	769	-0.00248066413568271	769	-0.00185902450845887	769	-8.93744171837518E-4
770	-0.00121329271748394	770	-0.00100259857872054	770	-0.00699905680890112	770	-9.05267414002431E-4	770	0.0053913301305677	770	0.00144267452663716	770	0.00214799292977563	770	-0.00183380872809646	770	-4.72063563818459E-4	770	-0.00140582583688609	770	0.00142801484525368	770	-0.0262423187732557	770	-0.00155689193520647	770	8.49035365955153E-4	770	-0.00205781505398495	770	0.00686428135477524	770	-0.00150037739562592	770	-0.00132596109416827	770	-0.00121971040176216
771	-8.89720411826112E-4	771	-9.19292274293326E-4	771	0.00317330071771238	771	0.00128703808955066	771	0.00527548980259063	771	0.00249054001561611	771	0.0013871411737556	771	-0.00168479497742169	771	-0.00102521115782128	771	-0.00392940994401059	771	5.01255280156876E-4	771	-0.0235206825723475	771	0.00256724786197715	771	-1.12574886424355E-4	771	-0.00162189057736128	771	0.00552351244480676	771	-0.00118205755011225	771	-0.00174355236529866	771	-0.00233341375680762
772	3.93851893832675E-4	772	-9.25985969865373E-4	772	0.00885565824432799	772	0.00344934359310312	772	0.00410964947461245	772	0.00284840550459453	772	1.46289417735979E-4	772	-0.00276578122674565	772	-0.00244835875182581	772	-0.00463299405113649	772	-0.00161550428494017	772	-0.0221690463714381	772	0.0067713876591613	772	0.00164581486119619	772	-0.00146596610073679	772	0.0051727435348381	772	-8.93737704596553E-4	772	-0.00259114363642965	772	-0.00237711711185096
773	0.00108742419948982	773	-1.91697183637984E-6	773	0.00802655861441526	773	0.00436029496237378	773	0.00269327026944666	773	0.00337627099357363	773	-0.00107456233828351	773	-0.0031267674760711	773	-0.00314150634582866	773	-0.00521657815826071	773	-0.00175226385003668	773	-0.0198374101705303	773	0.00966552745634441	773	0.00250420460881795	773	-0.0013745321836911	773	0.00419787308817821	773	-0.00220541785908068	773	-0.00218873490756	773	-0.00228082046689604
774	0.00101099650514769	774	2.13868086799351E-4	774	0.00278697326566135	774	0.00179079495355072	774	2.66711438550615E-4	774	0.00292413648255252	774	-0.00324541409430346	774	-0.00262775372539537	774	-0.00383465393983151	774	-0.00430016226538488	774	-0.00163902341513378	774	-0.0172457739696226	774	0.00926966725352862	774	2.25943564391429E-5	774	-0.00161126178650406	774	0.00379163546262173	774	-0.00263709801356704	774	-0.00146632617869091	774	-0.00312452382194106
775	3.99230187965394E-4	775	4.89653145433699E-4	775	-0.00369261208309268	775	-9.1870505527325E-4	775	-0.00237984739234509	775	0.00205200197153044	775	-0.00535626585032389	775	-0.00176873997471994	775	-0.00262780153383435	775	-0.00208374637250941	775	-0.0014157829802306	775	-0.0144941377687138	775	0.00835380705071298	775	2.0098410405911E-4	775	-9.97991389317221E-4	775	0.00367539783706405	775	-0.0021387781680513	775	-0.00124391744982066	775	-0.00260822717698517
776	2.32125247944914E-4	776	3.35438204067451E-4	776	-0.0112321974318474	776	-0.00332820506409703	776	-0.00147640622324108	776	0.00149986746050956	776	-0.00651711760634299	776	-0.00213972622404501	776	-8.40949127837831E-4	776	9.82669520364965E-4	776	-0.00158254254532775	776	-0.0101725015678058	776	0.00851794684789731	776	0.0017493738516805	776	-4.64720992130907E-4	776	0.00377916021150693	776	-0.00152045832253567	776	1.58491279048434E-4	776	-0.00132193053203
777	-7.44979692075987E-4	777	0.00300122326270191	777	-0.0169917827806012	777	-0.00476770507292024	777	-6.92965054136963E-4	777	3.73406901239548E-4	777	-0.0051879693623631	777	-0.00234528549051216	777	2.95903278158427E-4	777	0.0029761908230812	777	-3.96047672528432E-4	777	-0.00580776629860047	777	0.00751147133741181	777	0.00240776359930184	777	-4.91450594944709E-4	777	0.00348292258594984	777	-0.00104454502894047	777	0.00219014607624946	777	1.37345855447002E-4
778	-0.00158208463209686	778	0.0066070083213372	778	-0.0203613681293566	778	-0.00520720508174399	778	7.30476114966905E-4	778	-4.31506216644451E-4	778	-0.00405882111838274	778	-0.00286209194347276	778	1.52755684155181E-4	778	0.00385255905575477	778	0.00179133477424198	778	-0.00222673128349538	778	0.00888028256119799	778	0.00176615334692354	778	-0.00105818019775761	778	0.00399668496039318	778	-6.69288067685514E-4	778	0.00176159525572306	778	4.57434899974629E-4
779	-0.00246918957211761	779	0.00954279337997122	779	-0.0205513436640263	779	-0.00377704801486711	779	0.00397377625247586	779	-0.0013864193345281	779	-0.00127967287440267	779	-0.00385889839643383	779	8.22634140225986E-4	779	0.00446892728842752	779	0.00303871722101157	779	7.6430373160985E-4	779	0.00999909378498565	779	0.00218454309454419	779	-0.0018665449991655	779	0.00241939488640508	779	-7.34031106429889E-4	779	0.00177304443519599	779	0.00117752394450221
780	-0.00209629451213811	780	0.0117709377675848	780	-0.0185629579795403	780	-0.00235833123004348	780	0.00761648405728366	780	-0.00279133245241248	780	0.001439475369577	780	-0.00454570484939421	780	9.67222006609703E-4	780	0.00568529552110153	780	0.0029860996677824	780	1.65338746715094E-4	780	0.00791790500877099	780	0.00120293284216544	780	-0.00196777763466383	780	0.00250768452900996	780	-0.00183877414517575	780	0.0013444936146696	780	5.47612989030277E-4
781	-0.00110339945215898	781	0.0114893147650976	781	-0.0130545722950552	781	-0.0019596144452203	781	0.00802919186209117	781	-0.00324624557029551	781	0.00321862361355763	781	-0.00443251130235556	781	1.01809872991687E-4	781	0.00630166375377428	781	0.00355348211455286	781	-0.00139362623817973	781	0.00435671623255818	781	-6.86774102138799E-5	781	-0.00251901027016288	781	0.00155597417161513	781	-0.00244351718392011	781	0.00144594279414356	781	-5.62297966442138E-4
782	-4.86012746003794E-4	782	0.00762769176261102	782	-0.00725618661057048	782	-0.00170089766039805	782	0.00833189966689929	782	-0.0028811586881794	782	0.0031877718575366	782	-0.00427931775531665	782	-3.73602260625105E-4	782	0.00576803198644793	782	0.003850864561322	782	-0.00252259122307485	782	0.00378552745634497	782	2.19712337407252E-4	782	-0.00307024290566105	782	0.00179426381421965	782	-0.0026482602226654	782	-2.22608026382964E-4	782	-0.00111220892191444
783	-9.10462157788672E-4	783	0.0027860687601251	783	-0.00305780092608465	783	-0.00270218087557517	783	0.00809460747170743	783	-0.00260496345242167	783	0.00303577657101961	783	-0.00359738078509952	783	1.00985605758552E-4	783	0.00612910117109333	783	0.0026793279358035	783	-0.00310470309241051	783	0.0032943386801314	783	0.0018581020850279	783	-0.00159147554115968	783	0.00164255345682385	783	-0.00244378505401777	783	1.58602578285816E-4	783	-6.41057368346409E-4
784	-6.34911569574292E-4	784	-0.00156555424236249	784	-0.00242941524159868	784	-0.00209346409075195	784	0.00651731527651478	784	-0.00155544315573941	784	0.00263035069300965	784	-0.00175921354535014	784	2.1557347214074E-4	784	0.00458427321165544	784	0.00239103409341723	784	-0.00339625561506818	784	0.00560314990391841	784	0.00227649183264944	784	-9.82708176658242E-4	784	0.00258084309942852	784	-0.00186165526318938	784	2.89097458535004E-4	784	5.33281712343125E-4
785	-0.00129936098135985	785	-0.00446717724484902	785	-0.00441102955711337	785	-0.00125474730592945	785	0.00395002308132231	785	0.00157407714094315	785	0.00233492481499908	785	3.18953694399937E-4	785	0.0013001613385244	785	0.00251944525221948	785	0.00361274025103153	785	-0.00130780813772624	785	0.00934196112770458	785	0.00324488158027059	785	-0.00128394081215699	785	0.0026691327420334	785	-0.00104952547236081	785	0.00112959233878662	785	0.00137762079303183
786	-0.00191381039314553	786	-0.00473772515457505	786	-0.00717398612107178	786	-0.00237713137399709	786	0.00127225605060666	786	0.00281359743762444	786	0.00194949893698926	786	0.00235712093414975	786	0.00163926114908008	786	-2.05382707218149E-4	786	0.00430444640864547	786	0.00236063933961717	786	0.0106407723514916	786	0.00440921333833	786	-7.70439126500655E-4	786	0.00394394684242538	786	-0.00139739568153185	786	7.80087219037107E-4	786	0.00227195987372131
787	-0.00143825980493073	787	-0.00428725172617828	787	-0.00790771549473845	787	-0.00273014926645487	787	-0.0012857843702605	787	0.00356311773430651	787	0.00362407305897872	787	0.00471528817389899	787	0.00180217086688561	787	-0.00106021066665463	787	0.00337615256625856	787	0.00476908681695942	787	0.00852958357527811	787	0.00492575413270302	787	2.0548535012388E-4	787	0.00341675987305923	787	-0.00116526589070265	787	0.00163058209928657	787	0.00241629895441076
788	-9.27092167168908E-5	788	-0.00298677829777994	788	-0.00695144486840604	788	-0.00230316715891288	788	-0.00574382479112678	788	0.00379263803098873	788	0.00353864718096908	788	0.00564345541364997	788	0.00209508058469154	788	-0.0034950386260908	788	0.00378785872387333	788	0.00639753429430101	788	0.00413839479906564	788	0.00461229492707638	788	-3.78590173252036E-4	788	0.00227957290369307	788	-6.83136099874027E-4	788	0.00182107697953793	788	0.00219063803509911
789	4.37427767018939E-4	789	-0.00122630486938302	789	-0.00498517424207368	789	-0.00365618505137189	789	-0.0147518652119931	789	0.003082158327671	789	8.43221302958774E-4	789	0.00465162265339902	789	0.00249799030249775	789	-0.0035198665855285	789	0.0026695648814874	789	0.00607598177164359	789	-0.00202279397714822	789	0.00384883572144989	789	2.57334303371159E-4	789	9.32385934325985E-4	789	-6.01006309046248E-4	789	0.00162157185978895	789	0.00145497711578901
790	0.00160756475075452	790	-6.75831440985597E-4	790	-9.48903615740626E-4	790	-0.00469920294383019	790	-0.0204799056328593	790	0.00126344430284142	790	-0.00164893734505789	790	0.00281784796520768	790	6.40900020304258E-4	790	-0.00318822501149807	790	0.00132356773823439	790	0.00426701678674757	790	-0.00755337342270934	790	0.00311537651582317	790	0.0011132587799958	790	2.45198964960558E-4	790	-7.7099169917183E-4	790	0.00137138748239618	790	0.00139267327622505
791	0.00194770173449133	791	-1.75358012588056E-4	791	0.00201736701059119	791	-0.00253222083628923	791	-0.0221579460537251	791	6.45436549406853E-4	791	-0.00387978910107822	791	0.0012532965058405	791	-6.26190261890258E-4	791	-0.00172799562407988	791	-6.31510725365381E-4	791	0.00304908681695792	791	-0.00876570913601071	791	0.00215191731019626	791	0.0015091832566192	791	-0.00100198800440676	791	2.81768383212366E-5	791	0.00125093140194732	791	0.00254171226855959
792	0.00116783871822701	792	-3.94704114047073E-4	792	-6.16531682271493E-4	792	-0.00162535356864879	792	-0.022186045173596	792	-4.32571204027177E-4	792	-0.00673064085709818	792	-0.00257125495352728	792	-2.73376149282356E-4	792	-9.07766236662333E-4	792	-8.46589188965297E-4	792	0.00320115684716882	792	-0.00682804484931232	792	0.00190167725481949	792	8.12913184374153E-4	792	-0.00103958693439932	792	2.87345375814319E-4	792	0.00115047532149859	792	0.00293075126089537
793	-1.82024298037931E-4	793	-4.82666611072879E-4	793	-0.00148246220548476	793	-0.00120986437982218	793	-0.0167048486815133	793	-7.60578957461178E-4	793	-0.00749149261311732	793	-0.00454580641289581	793	-0.00149170929906095	793	9.92463150756073E-4	793	-0.00238166765256498	793	0.00360322687737824	793	-0.00458038056261412	793	0.00123006700244144	793	4.50308525709708E-4	793	-3.2212939192533E-4	793	9.16513913307604E-4	793	0.00109001924105012	793	0.00302979025322969
794	-8.41887314302348E-4	794	-0.0014406291080995	794	-0.0024983927286959	794	-8.14375190995698E-4	794	-0.00715365218943198	794	-1.18586710894597E-4	794	-0.0060223443691374	794	-0.00440035787226289	794	-0.00260004244883838	794	0.00111269253817348	794	-0.0011267461161637	794	0.00570529690758903	794	-0.00186271627591594	794	0.00175845675006148	794	-3.32296132955712E-4	794	2.65328150550026E-4	794	0.00113568245080042	794	0.00131956316060133	794	0.00271882924556532
795	-0.00182172539940062	795	-0.00158859160512481	795	-0.00450432325190864	795	-0.00143888600216968	795	-0.00116245569735085	795	9.43405535671182E-4	795	-0.00583319612515787	795	-0.0034249093316312	795	-0.0026083755986166	795	1.02921925590138E-4	795	-0.00101182457976368	795	0.00786736693779932	795	0.00150494801078338	795	0.0023468464976828	795	-6.54900791620783E-4	795	3.32785693025528E-4	795	7.84850988292618E-4	795	7.89107080152007E-4	795	0.00176786823790032
796	-0.00304148869099752	796	-0.00146655410215146	796	-0.00641025377512161	796	-0.00346339681334307	796	0.00185874079473081	796	0.00157502524762698	796	-0.00449486468867644	796	-0.00259972438416956	796	-0.00184670874839465	796	-5.16848686991089E-4	796	6.33289784822466E-4	796	0.0076326512255207	796	0.00229114126975993	796	0.00271523624530445	796	-0.00101750545028612	796	-4.49756764498765E-4	796	8.83534869102753E-4	796	2.5847562291581E-4	796	4.37751531946695E-4
797	-0.00331125198259663	797	-8.94516599177386E-4	797	-0.00519618429833368	797	-0.00426790762451645	797	0.00438993728681325	797	0.00284493130038133	797	-0.00207029056668606	797	-4.25751965293486E-4	797	-0.00185504189817287	797	-0.00187661929957361	797	0.00332929115905944	797	0.00704072109778853	797	0.00117056780121594	797	0.00292362599292506	797	-7.90110108951581E-4	797	-8.52299222023234E-4	797	-2.50010670830747E-4	797	3.47037432455011E-4	797	4.01518613861285E-4
798	-0.00253101527419375	798	-1.02479096202757E-4	798	-0.00739211482154634	798	-0.00305241843569082	798	0.00331113377889469	798	0.00156483735313628	798	4.42835553036147E-5	798	6.38220453582861E-4	798	-5.93375047950317E-4	798	-0.00318638991215625	798	0.00481529253329693	798	0.00467879097005763	798	0.00149999433267212	798	0.00370201574054629	798	-2.32714767617104E-4	798	-3.94841679547397E-4	798	-0.00162355621076316	798	4.75599241994473E-4	798	3.75285695775496E-4
799	-0.00167077856579301	799	8.90419073318327E-4	799	-0.00934923295062973	799	2.02554849574987E-4	799	0.00322192633621388	799	0.00163474340589076	799	0.00178885767729309	799	0.00156219287245918	799	7.27533264366365E-4	799	-0.0032161605247385	799	0.00380129390753403	799	0.00153686084232518	799	3.29420864128238E-4	799	0.00295123528635255	799	-4.16485062641136E-4	799	-7.98486108752883E-5	799	-0.00266710175069562	799	-3.35838948466893E-4	799	-3.09472223101182E-5
800	-0.00166054185739029	800	0.00237365536183987	800	-0.010717450714778	800	0.00353705044635699	800	0.00447234487986581	800	4.44649458644975E-4	800	0.00335343179928405	800	0.00166616529133545	800	8.27739226770596E-4	800	-0.00288593113732105	800	0.00233729528177129	800	1.04930714593721E-4	800	-0.00102115260441593	800	0.00205122316381434	800	-3.97630946885386E-4	800	5.12862537609848E-4	800	-0.0021306472906284	800	-1.97277138927809E-4	800	4.82819859604078E-4
801	-0.001260305148989	801	0.00186689165036213	801	-0.00946566847892782	801	0.00624154604313887	801	0.00333276342351763	801	-0.00150544448859957	801	0.00487800592127385	801	1.2013771021202E-4	801	0.00122794518917502	801	-0.00369570174990308	801	3.53296656008695E-4	801	8.63000586861951E-4	801	5.82739270402755E-5	801	0.00184121104127488	801	-1.28776831129329E-4	801	7.1557368609465E-4	801	-0.00193419283056073	801	-6.98715329388477E-4	801	7.66586941518987E-4
802	-7.29965329380633E-4	802	-0.00134987206111514	802	-0.00899388624307651	802	0.00725604163992166	802	0.00229318196716921	802	-0.0034555384358459	802	0.00430258004326411	802	-0.00177588987091237	802	0.00216815115157942	802	-0.00371547236248571	802	-0.00330070196975285	802	5.91070459130094E-4	802	0.00133770045849602	802	0.00112119891873608	802	1.70077284625592E-4	802	8.08284834579176E-4	802	-0.00173773837049307	802	-0.00189015351984967	802	8.50354023433475E-4
803	-4.69522398566902E-4	803	-0.00667663577259336	803	-0.0085321040072257	803	0.00709053723670383	803	2.13600510821088E-4	803	-0.00328076354498918	803	9.67154165254058E-4	803	-0.00231113198579536	803	0.00225835711398403	803	-0.00429842039494766	803	-0.00540565239299884	803	0.00286131495942321	803	0.00199712698995125	803	-4.2881320380328E-4	803	-2.31068599618744E-4	803	-5.90040169363704E-5	803	-0.00129283543971681	803	-0.00235226156722135	803	5.06602930732569E-4
804	-3.99079467753083E-4	804	-0.0100433994840712	804	-0.00757032177137518	804	0.00408503283348516	804	-0.00214598094552709	804	-0.0037888392996317	804	-0.00204827171275568	804	-0.00286593773054733	804	0.00153856307638822	804	-0.00317313366067573	804	-0.00653113159262286	804	0.00478054536417361	804	0.00392655352140725	804	-7.88825326342391E-4	804	-1.22144838634597E-5	804	-8.96292868451276E-4	804	-8.87944696579268E-5	804	-0.00179474175732164	804	7.74230629911443E-4
805	6.81363463060691E-4	805	-0.0141498761953036	805	-0.00695853953552472	805	0.00151952843026848	805	-0.00510556240187476	805	-0.00286691505427417	805	-0.00326369759076606	805	-0.00183074347529821	805	0.00232876903879298	805	-0.00103784692640385	805	-0.00664661079224693	805	0.00318977576892188	805	0.0068659800528641	805	-4.88837448881618E-4	805	-5.33360368107694E-4	805	-0.00182358171996633	805	2.15246500402166E-4	805	-0.00195722194742132	805	0.00132185832909038
806	7.21806393874758E-4	806	-0.0179157444660154	806	-0.00769902886066376	806	-6.96515428555422E-4	806	-0.00496590617534576	806	-0.00318499080891588	806	-0.00566912346877668	806	8.44507799513394E-5	806	0.00371704576612597	806	-0.0010525601921314	806	-0.00538208999187084	806	8.39006173672274E-4	806	0.0102254065843201	806	-1.97196372560882E-4	806	-8.25081405209538E-4	806	-0.00123461874156128	806	-8.07125295390065E-5	806	-8.29702137521871E-4	806	0.0026594860282696
807	7.52249324689203E-4	807	-0.0193116127367281	807	-0.00738960904824371	807	-0.00215258086560155	807	-0.00495628044150287	807	-0.00403306656355795	807	-0.00752454934678592	807	0.00232964503520083	807	0.00286524532405608	807	-5.37273457859477E-4	807	-0.00312756919149493	807	-0.00329176342157744	807	0.0127048331157757	807	2.58110831715008E-4	807	-0.00129682544842424	807	-4.25805689958203E-4	807	0.00104332844052024	807	-9.21823276218703E-5	807	0.00218711372744806
808	8.0269225550289E-4	808	-0.0187874810074415	808	-0.00607018923582281	808	-0.00254864630264873	808	-0.00242665470765857	808	-0.00382114231820019	808	-0.00633997522479657	808	0.00208483929044867	808	0.00146344488198658	808	2.68013276413015E-4	808	-3.73048391119291E-4	808	-0.00638253301682923	808	0.012564259647232	808	0.00142341803599155	808	-7.88569491640523E-4	808	2.93007361643838E-4	808	0.00147736941058074	808	2.25337482278043E-4	808	0.00205474142662787
809	3.6354198242794E-4	809	-0.0207033492781541	809	-0.00524076942340113	809	-0.00113471173969604	809	-9.17028973814737E-4	809	-0.00598028568078668	809	-0.00384589118730538	809	6.00535123021828E-4	809	6.81644439916695E-4	809	-8.66999893149867E-5	809	0.00161115003297052	809	-0.00645848937840565	809	0.0102828035620544	809	0.0011087252402664	809	-7.40313534855375E-4	809	3.91820413247146E-4	809	0.00132119619857107	809	2.32746910042714E-4	809	0.00275256720188732
810	-0.00100547269194173	810	-0.0254192175488663	810	-0.00510134961098085	810	1.79222823256886E-4	810	0.00131259676002937	810	-0.0083583257762454	810	-0.00180589118730534	810	-0.00126958923337117	810	-6.3015600215266E-4	810	-0.00201141325504306	810	0.00267266198800886	810	-0.00474433545935593	810	0.006853992338268	810	2.6403244454265E-4	810	-0.00102205757807017	810	5.30633464849828E-4	810	0.00137323813599188	810	4.29236486685802E-4	810	0.00368204361114977
811	-0.00119448736631256	811	-0.0304150858195786	811	-0.00592192979856065	811	0.00137315738620991	811	0.00267222249387356	811	-0.00741636587170369	811	-8.55891187304891E-4	811	-0.00152971358976473	811	-0.00265195644422178	811	-0.00209612652077151	811	0.00280417394304777	811	-0.00237018154030544	811	5.85181114480804E-4	811	-5.06603511816195E-5	811	-9.63801621286287E-4	811	-3.80553483547708E-4	811	0.00106528007341211	811	5.75726063329007E-4	811	0.00710152002041209
812	-0.0011435020406827	812	-0.0348004040883954	812	-0.00685343620469503	812	0.00304695683083089	812	0.00151152205281591	812	-0.00451440596716246	812	-8.4589118730527E-4	812	-8.49837946158338E-4	812	-0.00260510392813096	812	-0.0026208397864993	812	0.00243568589808607	812	0.00207397237874485	812	-0.00316363010930498	812	-0.00111460376711037	812	-0.00129576669462139	812	-6.22730949631389E-4	812	-2.82677989167368E-4	812	8.22215639972868E-4	812	0.00992099642967403
813	-0.00123251671505287	813	-0.0395356765237214	813	-0.00674630988584024	813	0.00245055681505768	813	-6.39659884526189E-4	813	-0.00262244606262119	813	-0.0016558911873048	813	0.002060037697448	813	-0.00214023990237244	813	-0.00303555305222769	813	4.37197853125681E-4	813	0.00387812629779472	813	-0.0036524413330925	813	-0.00108744095572	813	-0.00104805805051456	813	-0.00141637060849131	813	-0.00144063605174694	813	0.00158870521661569	813	0.0106204728389363
814	-7.1531389423285E-5	814	-0.0409609489590466	814	-0.00614918356698535	814	0.00123415679928485	814	-0.00211084182186649	814	2.95138419215135E-5	814	-0.00372589118730549	814	0.00434991334105383	814	-0.00117537587661509	814	-0.00399026631795607	814	-7.71290191836194E-4	814	0.00371228021684455	814	2.8747443121091E-5	814	4.6972185567018E-4	814	-3.20349406408127E-4	814	-0.00128001026735092	814	-0.00301859411432659	814	0.00189519479325995	814	0.00835994924819872
815	0.00129945393620634	815	-0.0396262213943732	815	-0.00283205724813129	815	4.87756783511983E-4	815	-0.00153202375920891	815	0.00354147374646274	815	-0.00597589118730468	815	0.00656978898466054	815	-9.7051185085828E-4	815	-0.00283497958368351	815	-0.00158977823679862	815	0.00314643413589533	815	0.00487993621933391	815	0.00168688466705991	815	1.07359237699001E-4	815	-9.83649926210362E-4	815	-0.00349655217690614	815	0.00175168436990258	815	0.00386942565746207
816	0.00318132275415817	816	-0.0358714938296982	816	0.003385069070724	816	-3.68643232260268E-4	816	-0.00235320569654984	816	0.00468116471452884	816	-0.00678327740331053	816	0.00713389309991186	816	5.44352174898677E-4	816	-6.49692849411743E-4	816	-0.00232047725842488	816	0.00117430243091121	816	0.0106699302423161	816	0.00176404747845016	816	1.05067881805532E-4	816	2.27104149290724E-5	816	-0.00385541440839088	816	8.87590137655714E-4	816	-0.00388328398318905
817	0.00398319157211091	817	-0.0317767662650237	817	0.00922219538957858	817	-0.00155504324803424	817	-0.00262438763389117	817	0.00337915398023902	817	-0.00570870328132056	817	0.00558116856889779	817	-7.83799343651026E-7	817	0.00138559388486037	817	-0.003542834512551	817	8.42456507903044E-4	817	0.0137740282003751	817	0.00219121028984048	817	3.22776525912616E-4	817	1.09070756069585E-4	817	-0.00355495476655587	817	1.73058048741126E-4	817	-0.00903763316127471
818	0.00425506039006329	818	-0.0270618829897042	818	0.0125493217084331	818	-0.00293144326380723	818	-0.0036355695712329	818	0.00124714324594866	818	-0.00426412915933039	818	0.00190844403788404	818	-0.00142591977358641	818	0.0039808806191326	818	-0.00367519176667841	818	0.0016906105848955	818	0.014068126158433	818	0.00134837310123004	818	3.04851700185793E-5	818	0.00103543109720938	818	-0.00340449512472141	818	-4.21474040174452E-4	818	-0.0104719823393609
819	0.00378692920801615	819	-0.0236068591950227	819	0.0152547003106926	819	-0.00317797005614295	819	-0.00302744749766681	819	0.00106513251165907	819	-0.00212955503734058	819	1.85719506870186E-4	819	-0.00235478138829048	819	0.00491616735340461	819	-0.00397754902080472	819	0.00105876466188715	819	0.0131022241164924	819	0.00107723197227738	819	3.17818802231251E-4	819	0.00151150712212278	819	-0.00281403548288672	819	-6.26006129088807E-4	819	-0.00971633151744644
820	0.00289879802596804	820	-0.0204718354003397	820	0.0165697611462976	820	-0.00357451989876179	820	-0.00429945196757142	820	-2.56878222630874E-4	820	3.85019084649052E-4	820	-0.00234700502414409	820	-0.0012443203921686	820	0.00445145408767722	820	-0.00384990627493131	820	1.76918738879372E-4	820	0.0114363220745517	820	-1.23600782193201E-4	820	8.2508425046246E-4	820	0.00170753145317626	820	-0.00328357584105099	820	-6.50538218004648E-4	820	-0.00704068069553188
821	0.00175066684392089	821	-0.0183268116056574	821	0.0163048219819029	821	-0.00270106974138162	821	-0.00476145643747738	821	-7.28888956920137E-4	821	0.00195959320663963	821	-0.00336972955515868	821	-0.00168385939604843	821	0.00257674082194903	821	-0.00196226352905704	821	-3.94927184128591E-4	821	0.00727042003260969	821	-1.44433536663158E-4	821	-3.7650301304204E-5	821	0.00187355578422999	821	-0.00187311619921537	821	-2.45070306919004E-4	821	-0.00457502987361735
822	0.00103698093299887	822	-0.0165817878109751	822	0.0150998828175082	822	-0.00102761958400066	822	-0.00557346090738164	822	4.8918719061497E-4	822	0.00198400396712994	822	-0.0022022043585741	822	-7.43398399927209E-4	822	5.84322359467038E-4	822	-3.54759852191577E-4	822	5.21402710097263E-4	822	0.00407804845720072	822	6.47337088652833E-5	822	-2.10384853073009E-4	822	0.00143958011528422	822	-4.92687329280983E-4	822	-9.96403334951879E-5	822	-0.00342971675020731
823	5.56630835452765E-4	823	-0.014856764016292	823	0.0124849436531127	823	0.00228583057338039	823	-0.00569546537728804	823	0.00246960914745298	823	9.8400396712961E-4	823	7.72063483167607E-4	823	2.07062596194518E-4	823	-0.00197613641536787	823	-6.81011038534685E-4	823	0.00170847966962295	823	0.00211099947817139	823	-6.09904560455732E-6	823	5.06880595159132E-4	823	6.25604446337746E-4	823	0.00103691069932932	823	-7.75234676892111E-4	823	-0.00372352148641131
824	-1.3719262092593E-5	824	-0.0144717406543498	824	0.00667000448871757	824	0.00371928073076067	824	-0.00655746984719308	824	0.00245003110429121	824	-6.95996032870738E-4	824	0.00192633132490894	824	-2.92476407685704E-4	824	-0.00279659519020381	824	-0.00198726222487711	824	0.00409555662914762	824	-0.00115604950085757	824	1.33068199924757E-4	824	1.74146043391055E-4	824	2.81628777391241E-4	824	0.00288650872793994	824	-0.00140082902029004	824	-0.00387732622261527
825	-2.44069359638388E-4	825	-0.0127067202350375	825	-0.00120556308445341	825	0.00374276344741897	825	-0.00604971587304259	825	0.00230045306112903	825	-0.00278599603287066	825	0.00311059916665002	825	-0.00144342619576854	825	-0.00224705396503921	825	-0.00313351341121937	825	0.00566263358867225	825	-0.00407309847988646	825	5.7281650704244E-4	825	7.01311894222734E-4	825	3.67896569366977E-4	825	0.00518610675655129	825	-5.56423363686775E-4	825	-0.00394113095881909
826	-7.24419457184489E-4	826	-0.0114716998157256	826	-0.00972268073260896	826	0.00383632647696608	826	-0.00398255773688927	826	0.00163087501796699	826	-0.00346599603287068	826	0.00318486700839138	826	-0.00104785591822143	826	-0.00122751273987376	826	-0.00495976459756164	826	0.00770971054819736	826	-0.00260014745891635	826	-8.16001900592056E-4	826	0.00124823207146729	826	4.14764898283515E-4	826	0.00661570478516182	826	-5.42017707084952E-4	826	-0.00302493569502271
827	-6.24769554730342E-4	827	-0.0108566793964133	827	-0.0170697983807644	827	0.00329988950651394	827	-0.00113539960073616	827	9.31296974805207E-4	827	-0.00221599603287004	827	0.00293913485013331	827	-0.00103228564067415	827	-2.87971514709717E-4	827	-0.00518601578390498	827	0.00563678750772212	827	-9.97196437945824E-4	827	-0.0010048203082258	827	0.00120515224871198	827	2.31633227201655E-4	827	0.00900530281377243	827	1.32387949517643E-4	827	-0.00173874043122613
828	-5.95119652275322E-4	828	-0.0108416589771005	828	-0.0213269160289205	828	0.00117345253606072	828	5.61758535417844E-4	828	7.71718931643406E-4	828	5.40039671292902E-5	828	9.1340269187512E-4	828	5.13284636873834E-4	828	6.11569710454951E-4	828	-0.00357226697024693	828	0.00206386446724771	828	0.00130575458302573	828	-0.00176363871586016	828	6.42072425957707E-4	828	-5.01498443881587E-4	828	0.0106249008423838	828	8.06793606119349E-4	828	-6.22545167430211E-4
829	4.77035987531238E-4	829	-0.0100166385577882	829	-0.0188340336770763	829	3.77015565607763E-4	829	0.00223891667157083	829	0.00147516618659171	829	0.00407400396712987	829	5.70371898422017E-4	829	5.98854914421132E-4	829	0.00155145501674614	829	-5.79648402091237E-4	829	-0.001291904733149	829	0.00418458672637456	829	-0.00252245712349275	829	6.08992603202907E-4	829	-2.44630114964117E-4	829	0.0097943626034267	829	2.90662069575731E-4	829	-1.51688120394233E-4
830	9.71697364692048E-4	830	-0.0103416181384768	830	-0.0141011513252316	830	0.00203057859515532	830	7.66074807724948E-4	830	0.00213163873965172	830	0.00789400396713003	830	-0.00123995753022399	830	0.00140442519196871	830	0.00234168440416394	830	6.41839920565879E-4	830	-0.00121052009346467	830	0.00648929999210157	830	-0.00245127553112745	830	-0.00112408721955237	830	-0.00187776178604615	830	0.00769368809690096	830	-0.00131600666011611	830	1.43830709881776E-4
831	0.001556358741853	831	-0.00976681912817234	831	-0.0104782689733867	831	0.0019841416247024	831	-0.00226676705612228	831	0.00317811129271117	831	0.00913400396712927	831	-0.00388028695886966	831	0.00112999546951542	831	0.00479191379158106	831	0.00120332824322311	831	-0.00452913545378131	831	0.00662401325782991	831	-9.20093938761468E-4	831	-0.00120716704230794	831	-0.00264089345712915	831	0.00509301359037551	831	-9.82675389806786E-4	831	-8.9065045984249E-4
832	0.00214102011901396	832	-0.00864210168960877	832	-0.00786715999851761	832	0.00278786561242406	832	-0.00442023172193196	832	0.00401458384577147	832	0.00803400396712917	832	-0.00536061638751484	832	-4.28124545106101E-4	832	0.00682214317899899	832	0.00170481656587906	832	-0.00743775081409837	832	0.00854872652355798	832	-0.00107736974075134	832	-0.00178044805112609	832	-0.00262298260668903	832	8.92339083849336E-4	832	-8.19344119499021E-4	832	-8.45131629566787E-4
833	0.00311568149617436	833	-0.00767738425104625	833	-0.00707617805727345	833	0.00436164890052648	833	-0.00361392584109854	833	0.00380105639883155	833	0.00574400396712971	833	-0.00437094581616115	833	-0.00214760414105264	833	0.00671237256641621	833	0.00104630488853541	833	-0.00820636617441473	833	0.00793343978928629	833	-5.94077214346456E-4	833	-0.00202380318112461	833	-0.00148468766937082	833	-0.0021183354226757	833	-0.0015860128491898	833	-0.00189961279929118
834	0.00239034287333517	834	-0.00747266681248249	834	-0.00673519611602824	834	0.00528543218862865	834	-0.00329761996026345	834	0.0031375289518909	834	0.00152400396712959	834	-0.00385127524480744	834	-0.00242708373699863	834	0.00444260195383439	834	-1.22067888082E-5	834	-0.00767498153473234	834	0.00726815305501471	834	-3.30784687941232E-4	834	-0.00182715831112379	834	-0.00175639273205253	834	-0.0031590099292016	834	-5.32681578881089E-4	834	-0.00169409396901532
835	0.00194500425049604	835	-0.00638794937392007	835	-0.00507421417478326	835	0.00363921547673041	835	-0.00146131407942995	835	0.00249400150495127	835	-0.00275599603287002	835	-0.00146160467345346	835	-0.00377656333294585	835	0.00319283134125214	835	0.00115928153384814	835	-0.0110335968950483	835	0.0067528663207419	835	-1.67492161535776E-4	835	-0.00109051344112299	835	-2.58097794735512E-4	835	-0.00429968443572726	835	1.60649691427928E-4	835	-0.0024885751387389
836	0.00137966562765701	836	-0.00587323193535649	836	-0.00265323223353775	836	0.0031829987648333	836	4.9499180140522E-4	836	0.00117590777743448	836	-0.00556599603287022	836	0.00111207802932967	836	-0.00512604292889307	836	2.95020416316127E-4	836	0.00230100405845324	836	-0.00995461887220284	836	0.00703963603677238	836	1.55800364868952E-4	836	1.06131428878165E-4	836	0.00132019714258291	836	-0.00396779529290381	836	-3.07028160834832E-4	836	-0.00176279480953401
837	-5.67299518294817E-6	837	-0.00578871535883607	837	0.00146774970770736	837	0.00118678205293588	837	0.00104129768223871	837	-0.00186198470121468	837	-0.00673599603287034	837	0.00388590932957378	837	-0.00464552252483941	837	-9.70495705374219E-4	837	0.00313273525720437	837	-0.00511461887220221	837	0.00611611154725722	837	9.39092891274029E-4	837	0.00108277629888054	837	0.00305849207990061	837	-0.0034787741630673	837	-2.94743388005614E-4	837	-0.0015173751655535
838	-0.00123101161802186	838	-0.00533460050640056	838	0.00639765409190218	838	3.80570249019385E-4	838	5.77453512538462E-4	838	-0.0038498771798654	838	-0.00656599603287056	838	0.00337974062981683	838	-0.00347580280717263	838	2.73988172937223E-4	838	0.00380446645595445	838	1.53811277971982E-5	838	0.00966258705774248	838	0.00223279590101377	838	8.33351231580792E-4	838	0.00291338212878323	838	-0.00231975303322951	838	8.17541384822817E-4	838	-9.21955521572926E-4
839	-0.00173635024086138	839	-0.00493048565396492	839	0.00884796570352542	839	-5.65618105651922E-4	839	-3.47107565272786E-4	839	-0.00503776965851532	839	-0.00594599603287005	839	0.00279357193006025	839	-0.00193990859113402	839	0.00100847205124754	839	0.00363619765470613	839	0.00468538112779804	839	0.0131090625682271	839	0.00266846010891086	839	9.71475749551587E-5	839	0.00387755993292593	839	-0.00117073190339223	839	2.9826157651236E-5	839	-5.06535877591752E-4
840	-0.00160168886370027	840	-0.00496637080152862	840	0.0105382773151481	840	-0.00124180646032368	840	-9.91668643084864E-4	840	-0.00446566213716437	840	-0.00338599603287015	840	0.00260740323030362	840	-7.8401437509612E-4	840	-8.27044070441652E-4	840	0.00238792885345696	840	0.00787538112779718	840	0.0159455380787135	840	0.00314412431680822	840	3.00943918330354E-4	840	0.00375173773706727	840	-2.11710773555751E-4	840	-6.17889069521205E-4	840	0.00133888376638858
841	-0.00168702748654059	841	-0.00416225594909303	841	0.0109985889267721	841	-0.00200799481499558	841	-0.00115622972089646	841	-0.00347355461581422	841	-0.00180599603287046	841	0.00132123453054689	841	5.18798409432364E-5	841	-0.00164256019213216	841	0.00104966005220763	841	0.00818538112779788	841	0.0172520135891991	841	0.00211978852470462	841	-9.05259738296138E-4	841	0.00250591554120927	841	-0.00169268964371838	841	-6.05604296692874E-4	841	0.0014143034103693
842	-0.00137236610938007	842	-0.00255814109665753	842	0.00777890053839592	842	-0.00214418316966736	842	-0.00100079079870863	842	-1.89784235584689E-4	842	-0.0010779563708665	842	-0.00202336863757324	842	0.00107777405698162	842	-0.00218807631382134	842	-1.17837313434954E-4	842	0.00576198533203254	842	0.0149784890996836	842	0.00123545273260284	842	-8.14633949213217E-5	842	2.80093345351062E-4	842	-0.00146216403662436	842	-0.00140373956637152	842	0.00114607623256191
843	-0.00176770473221932	843	-0.0021540262442219	843	0.00486921215001868	843	-0.00268037152433909	843	-0.00156535187652018	843	0.00235620328981945	843	4.57469507144204E-4	843	-0.0015358844301776	843	0.00179366827302019	843	-7.83592435510627E-4	843	-4.04306098268137E-4	843	0.00286739514191137	843	0.00803496461016984	843	0.00121111694049958	843	2.82332948453146E-4	843	-2.75728850507306E-4	843	-0.00276963245985318	843	-0.00146243489272457	843	0.00187298662570612
844	-0.00178304335505786	844	-0.00223075575050302	844	0.00205952376164298	844	-0.00230655987900974	844	-0.00107991295433152	844	0.00329219081522147	844	6.8289538515387E-4	844	-8.284002227823E-4	844	0.00238956248905886	844	0.0019608914427991	844	4.29225116898913E-4	844	0.00206280495179101	844	0.00125144012065537	844	0.00169678114839655	844	1.3612929182738E-4	844	-7.41551046365529E-4	844	-0.00314710088308168	844	-9.41130219078268E-4	844	0.0011198970188504
845	-0.00142838197789708	845	-8.9754308957346E-4	845	-4.9016462673368E-4	845	-0.00208290369162079	845	-8.50124329891955E-5	845	0.00193817834062493	845	-7.71678736835923E-4	845	-0.00120091601538608	845	0.00294347387923821	845	0.00359537532110998	845	0.00193275633206458	845	0.00311821476167129	845	-0.00354208436885983	845	0.00139219337038021	845	6.32904904399823E-4	845	-8.12899203831208E-4	845	-0.00291456930631018	845	-8.69825545431802E-4	845	4.96807411995093E-4
846	-0.00140372060073624	846	-6.44330428642981E-4	846	2.70146984889585E-4	846	-0.00192934466544337	846	3.29551587824106E-4	846	8.0416586602805E-4	846	-0.00265625285882543	846	-6.93431807990308E-4	846	0.00254614600325542	846	0.00329985919942022	846	0.00373628754723132	846	0.00316362457155073	846	-0.00688560885837486	846	0.0016974481011669	846	0.00132154256022066	846	-9.48951087304195E-4	846	-9.52037729538446E-4	846	-4.68520871785394E-4	846	3.23717805138735E-4
847	-0.00142905922357617	847	-0.00126111776771332	847	0.00109045859651324	847	-0.00239578563926468	847	7.64115608637539E-4	847	-7.19846608569163E-4	847	-0.00409082698081598	847	-2.75947600594684E-4	847	0.00148881812727275	847	0.0023643430777307	847	0.00373981876239782	847	0.00257903438143092	847	-0.00786913334788952	847	0.00297270283195328	847	1.10180216039701E-4	847	-4.95002970776426E-4	847	-5.95061527679519E-5	847	-8.17216198139015E-4	847	7.50628198282755E-4
848	-8.2439784641597E-4	848	-7.47905106783797E-4	848	8.30770208136933E-4	848	-0.00307222661308693	848	1.08679629449604E-4	848	-0.00259385908316556	848	-0.00583540110280545	848	1.21536606800809E-4	848	-0.00103850974870934	848	2.88269560408949E-5	848	0.00298334997756378	848	0.00190444419131008	848	-0.00668265783740374	848	0.00269795756273972	848	-1.11821281389979E-5	848	-5.31054854249646E-4	848	0.00150302542400382	848	-9.35911524493349E-4	848	0.00104753859142726
849	-4.33665186863941E-4	849	1.25307554145415E-4	849	0.00328108181975928	849	-0.00375866758690879	849	-0.00122675634973746	849	-0.00257467544320722	849	-0.00448589118730514	849	2.91368257000713E-4	849	-0.00247583762469272	849	-0.00269405924680299	849	5.08895944499876E-4	849	-0.00401417138079374	849	-0.00496644203299201	849	0.00196321229352669	849	-1.12544472319343E-4	849	-0.0014371067377219	849	0.00141059191058623	849	-4.25376047405557E-4	849	0.00100792917190784
850	-4.0471868014258E-4	850	-9.22126906323761E-4	850	0.00467139343138356	850	-0.00303510856072986	850	-0.00189219232892412	850	-0.00268510826950319	850	-0.00322589118730487	850	2.41481600337323E-4	850	-0.00267316550067509	850	-0.00193382985938584	850	-0.0020353163183513	850	-0.00676046999873492	850	-0.00435505739330821	850	0.0022184670243135	850	-4.53906816498595E-4	850	-0.00104315862119453	850	0.00150596258634472	850	-8.64932873905211E-4	850	2.87537374868307E-4
851	-6.57721734196315E-5	851	-0.00131011604227904	851	0.00294123138070823	851	-0.00224157095853705	851	-0.00241767868956622	851	-0.00299554109579869	851	-7.58911873051105E-5	851	1.21594943673031E-4	851	-0.00176684152357609	851	-0.0011736004719678	851	-0.00427952858120229	851	-0.00608676861667679	851	-0.00279367275362485	851	0.00286433731735958	851	-4.50083804986789E-4	851	-9.39210504665944E-4	851	0.00114133326210464	851	-0.001934489700405	851	4.47145577828323E-4
852	2.03174333301526E-4	852	-0.00127810517823423	852	0.00357333284582051	852	7.9161671857797E-4	852	-0.00198398794730092	852	-0.0049559739220939	852	0.00259410881269506	852	3.517082870097E-4	852	5.49129387193759E-4	852	-0.00220337108455038	852	-0.00456374084405375	852	-0.00393306723461784	852	-1.42288113941902E-4	852	0.00224026179398429	852	-3.15666505175116E-5	852	-2.55262388138888E-4	852	6.36703937863636E-4	852	-4.34046526905263E-4	852	2.36753780789911E-4
853	-8.67879159975438E-4	853	-0.00184609431418892	853	7.65434310933344E-4	853	0.00422480439569384	853	-0.00199029720503585	853	-0.00855640674838831	853	0.00115410881269451	853	-0.00199817836965366	853	0.00249510029796429	853	-0.00608314169713253	853	-0.00514795310690541	853	-0.00579936585255858	853	0.0035290965257424	853	0.00244618627060778	853	0.00142695050395147	853	0.00110868572838907	853	0.00157207461362319	853	-2.93603353405558E-4	853	-0.00110363801625013
854	-0.0056189326532543	854	-0.00147408345014366	854	-0.0104424642239547	854	0.0041079920728091	854	-0.00305660646277151	854	-0.0185368395746845	854	-0.00625589118730474	854	-0.0087980650263173	854	0.00367107120873378	854	-0.0135829123097153	854	-0.00913216536975625	854	-0.0101956644704995	854	0.00354048116542582	854	0.00412211074723157	854	0.00445546765842142	854	0.00592263384491698	854	0.00769744528938254	854	-1.43160179905344E-4	854	-0.00144402981328895
855	-0.0126099861465319	855	-8.82072586098737E-4	855	-0.0279103627588428	855	1.51179749924069E-4	855	-0.0102229157205063	855	-0.0326363133957752	855	-0.0189275248023009	855	-0.0219172407834849	855	0.00446704211950344	855	-0.029290917689031	855	-0.0184556260419102	855	-0.0229729872723103	855	-2.17075271714329E-4	855	0.00544803522385529	855	0.00624398481289123	855	0.0120465819614441	855	0.0199268020012173	855	0.0024170293229977	855	-0.00215672843181913
856	-0.0200418792439372	856	-0.00117027345827037	856	-0.0498782612937303	856	-0.00756563257296072	856	-0.025649224978241	856	-0.0533740610074984	856	-0.0373520989242921	856	-0.0413251369215573	856	0.00334301303027384	856	-0.0567557456484682	856	-0.0347077338508059	856	-0.0418941536050905	856	-0.0119367256471357	856	0.00633395970047967	856	0.00606250196736102	856	0.0170105300779717	856	0.0346293335779881	856	0.00264676221882443	856	-0.00489357932903278
857	-0.0278046119454674	857	-6.39763996488796E-4	857	-0.0742861598286169	857	-0.0202224448958459	857	-0.0486255342359758	857	-0.0806518086192209	857	-0.060226673046281	857	-0.0670630330596298	857	-0.00125101605895672	857	-0.092090573607905	857	-0.0557998416597014	857	-0.0651353199378688	857	-0.0294663760225582	857	0.00343988417710328	857	0.00413101912183045	857	0.0172244781944997	857	0.0477718651547603	857	-0.00320350488534871	857	-0.0106004302262468
858	-0.0344673446469983	858	8.07454652926864E-5	858	-0.0937974243158273	858	-0.036149478266184	858	-0.0758022794463464	858	-0.110739556230944	858	-0.0853012471682719	858	-0.0985509291977023	858	-0.0069380453785115	858	-0.128165401567342	858	-0.0778619494685975	858	-0.0864364862706477	858	-0.0535260263979787	858	-0.00165786430655412	858	5.64596526975159E-4	858	0.012316822964145	858	0.0544643967315315	858	-0.0133637719895221	858	-0.0186972811234609
859	-0.0375600773485303	859	-5.88745072925612E-4	859	-0.101532054755362	859	-0.0530567326839746	859	-0.104689460609352	859	-0.135267303842666	859	-0.108275821290261	859	-0.127718825335776	859	-0.0156980749283901	859	-0.157880229526778	859	-0.0966640572774926	859	-0.107797652603426	859	-0.0818456767734013	859	-0.0102192857504928	859	-0.00612676581720351	859	-0.00213243561309007	859	0.048196928308303	859	-0.0265840390936951	859	-0.028604132020674
860	-0.0374128100500615	860	-0.00162823561114411	860	-0.100136685194895	860	-0.0673539871017637	860	-0.130456641772358	860	-0.15112505145439	860	-0.127070395412251	860	-0.147256721473848	860	-0.0272281044782696	860	-0.178945057486215	860	-0.112846165086388	860	-0.127068818936205	860	-0.113915327148822	860	-0.0234107071944321	860	-0.0133581281613839	860	-0.0278716941903241	860	0.0218994598850735	860	-0.047594306197869	860	-0.0447209829178874
861	-0.0351655427515922	861	-0.00215772614936238	861	-0.0938613156344292	861	-0.076081241519554	861	-0.144673822935364	861	-0.155862799066113	861	-0.139424969534241	861	-0.153494617611921	861	-0.0377681340281493	861	-0.183309885445651	861	-0.122688272895285	861	-0.144569985268983	861	-0.141064977524245	861	-0.0388521286383705	861	-0.0195094905055644	861	-0.0566109527675582	861	-0.0194080085381545	861	-0.0712945733020414	861	-0.0638178338151008
862	-0.0305482754531239	862	-0.00302721668758021	862	-0.0839859460739625	862	-0.0766784959373448	862	-0.146781004098369	862	-0.148949088920525	862	-0.143869543656231	862	-0.148611385764615	862	-0.0446081635780295	862	-0.173924713405089	862	-0.127228826496248	862	-0.157701933559343	862	-0.161514599919171	862	-0.0512535500823086	862	-0.0224508528497429	862	-0.0833602113447931	862	-0.0642856448443574	862	-0.0919052981475312	862	-0.0806893121458527
863	-0.0238956556783476	863	-0.00312804634041619	863	-0.0753305765134957	863	-0.0709657503551355	863	-0.138828185261375	863	-0.133085061871175	863	-0.137804117778222	863	-0.131537908703096	863	-0.0500081931279084	863	-0.159249541364525	863	-0.128059042225923	863	-0.164969704014394	863	-0.174916390144424	863	-0.0622249715262484	863	-0.0245722151939232	863	-0.103309469922029	863	-0.102810274168599	863	-0.107316122502002	863	-0.0929817964404167
864	-0.0146212517448019	864	-0.0026393377569125	864	-0.0739952069530299	864	-0.059443004772926	864	-0.126715366424381	864	-0.114241034821825	864	-0.125908691900212	864	-0.108454431641576	864	-0.0510682226777872	864	-0.144074369323962	864	-0.125389257955598	864	-0.163747474469447	864	-0.177738180369677	864	-0.0696963929701866	864	-0.0244935775381023	864	-0.115178728499263	864	-0.126254903492839	864	-0.118966946856474	864	-0.101624280734981
865	-0.00457684781125689	865	-0.00281062917340957	865	-0.0761792630978011	865	-0.0458807419398974	865	-0.111623367932207	865	-0.0964070077724752	865	-0.110213266022201	865	-0.0870809545800562	865	-0.0487903121517652	865	-0.129929197283398	865	-0.117159473685272	865	-0.155745244924499	865	-0.16930997059493	865	-0.0699608922966721	865	-0.0226267606733979	865	-0.117186166285383	865	-0.13064953281708	865	-0.121797771210945	865	-0.102796765029545
866	0.00492755612228812	866	-0.00231192058990626	866	-0.0788471616326891	866	-0.0348585086629409	866	-0.0993314196652264	866	-0.0822029807231255	866	-0.0944978401441912	866	-0.071277477518537	866	-0.0451019154986465	866	-0.115664025242836	866	-0.107019689414947	866	-0.14261301537955	866	-0.157211760820183	866	-0.0650349678200479	866	-0.0207951573265168	866	-0.112778390553678	866	-0.119084162141321	866	-0.119378595565416	866	-0.0978392493241094
[truncated: 1,335 more rows]
