# Supplementary figures and images for: Mutational phospho-mimicry reveals a regulatory role for the XRCC4 and XLF C-terminal tails in modulating DNA bridging during classical non-homologous end joining
Source: eLife journal article supplement (doi:10.7554/elife.22900), 2017-05-13

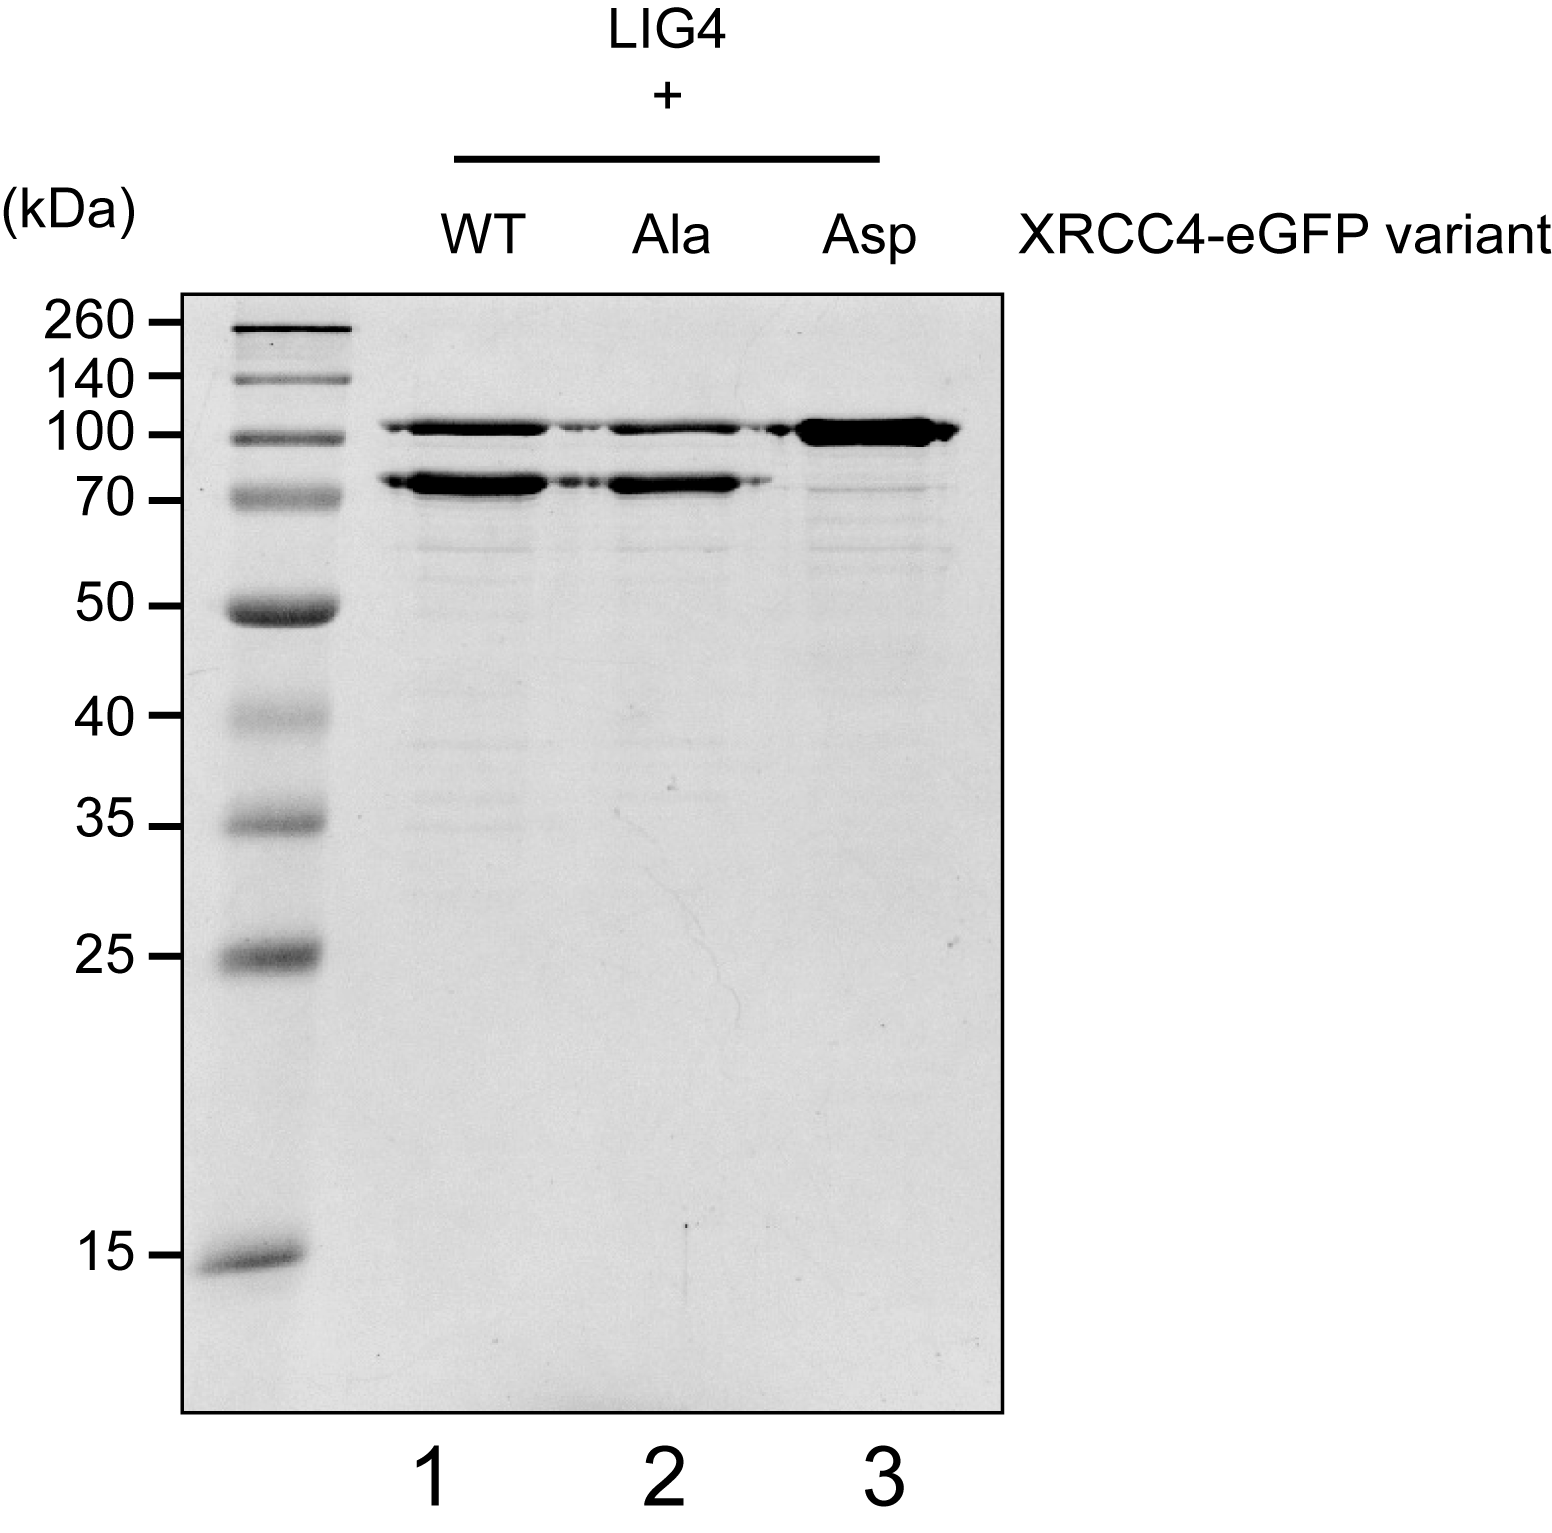

Supplement: supp [file elife-22900-supp-v1.zip › elife_poa_e22900_Figure_9_figure_supplement_1.tif]

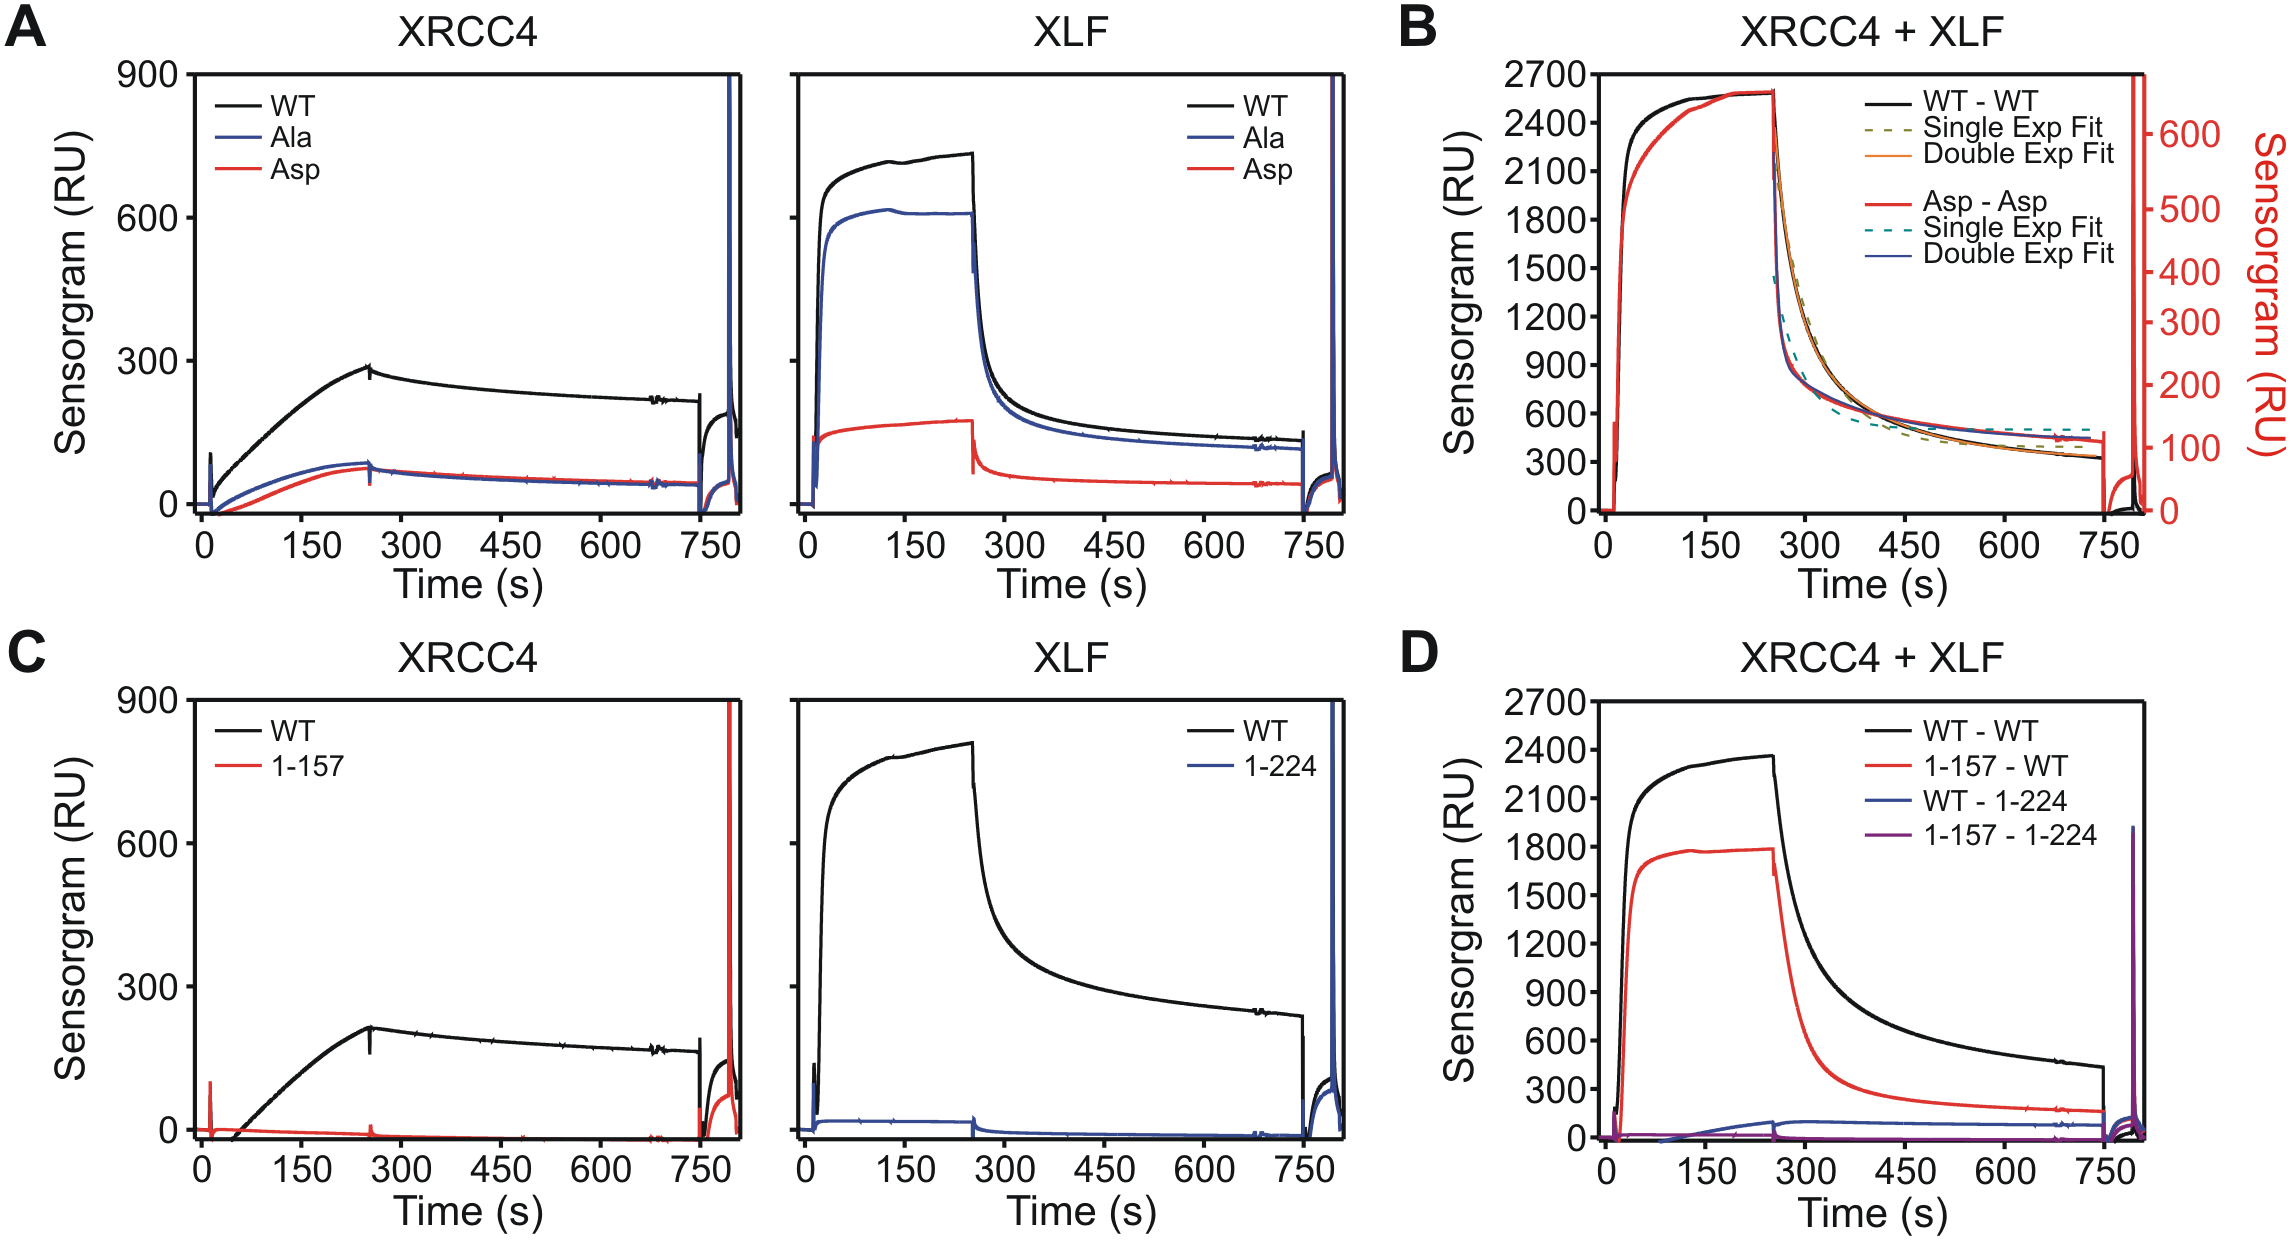

Supplement: supp [file elife-22900-supp-v1.zip › elife_poa_e22900_Figure_8_Supplement_1.tif]

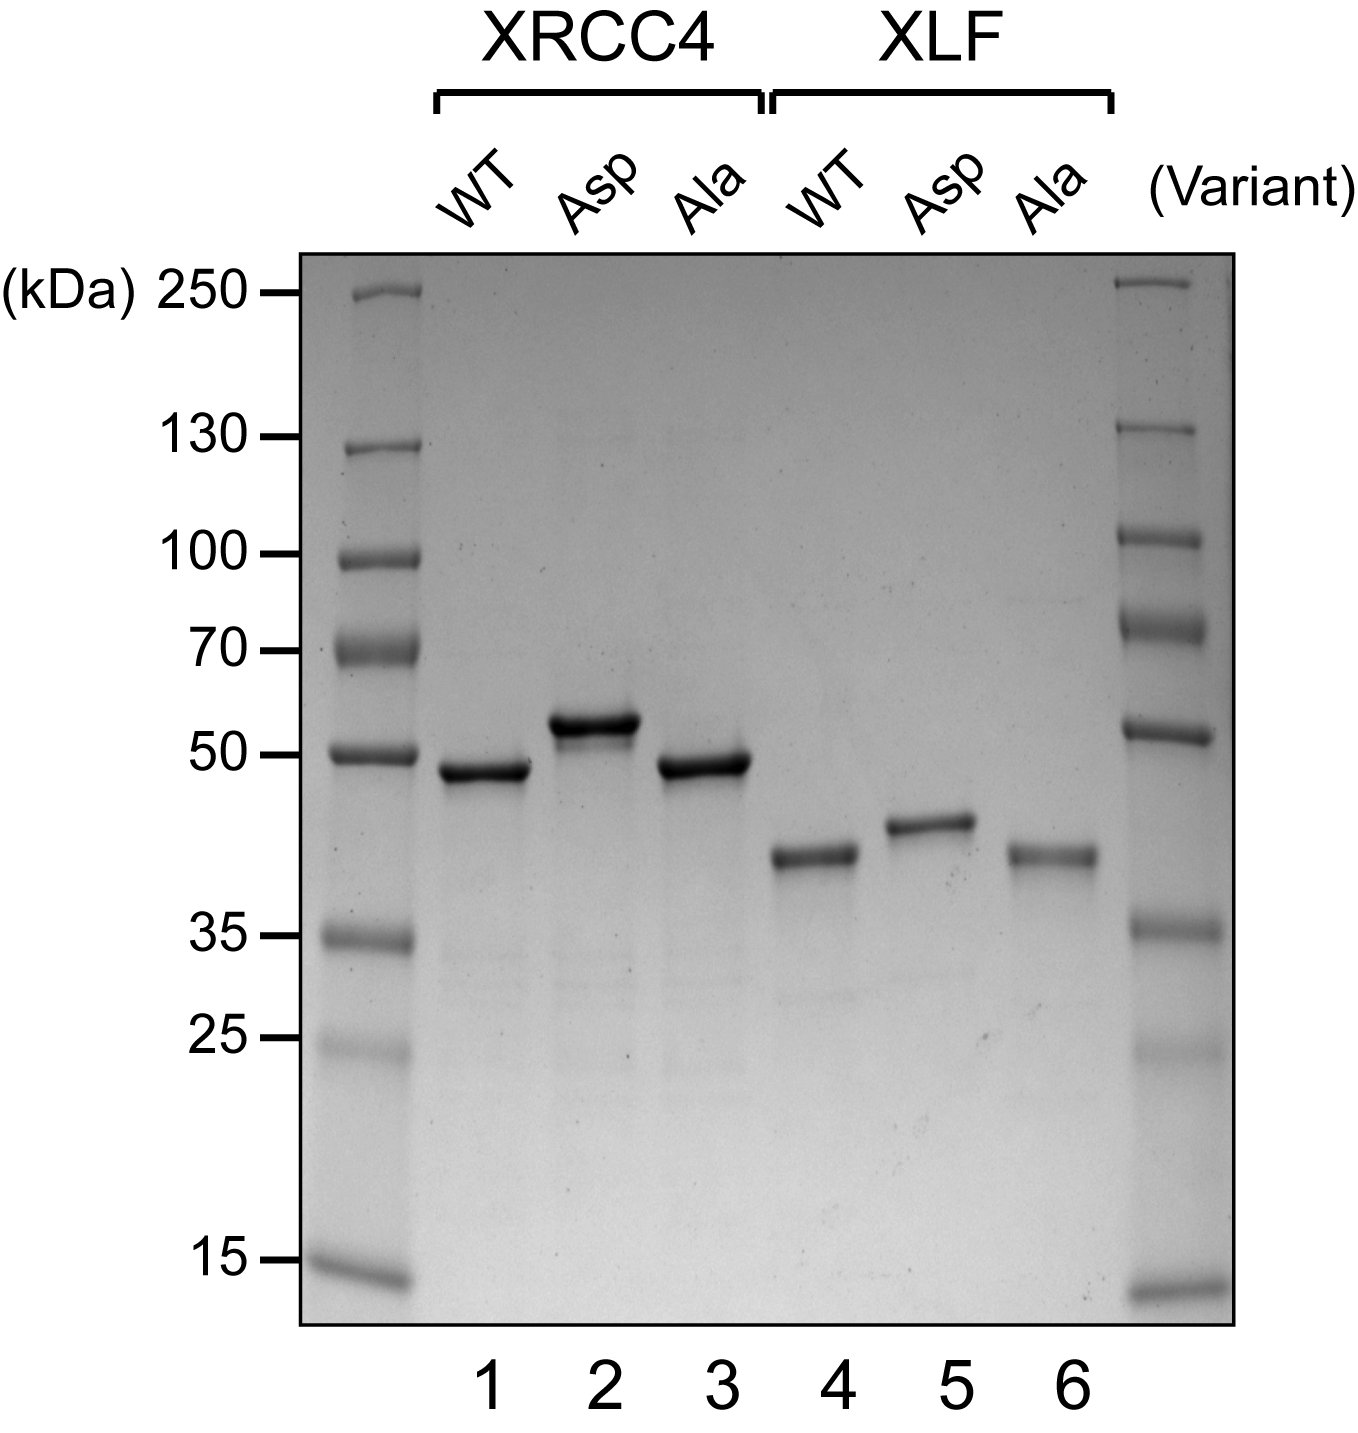

Supplement: supp [file elife-22900-supp-v1.zip › elife_poa_e22900_Figure_1_figure_supplement_1.tif]

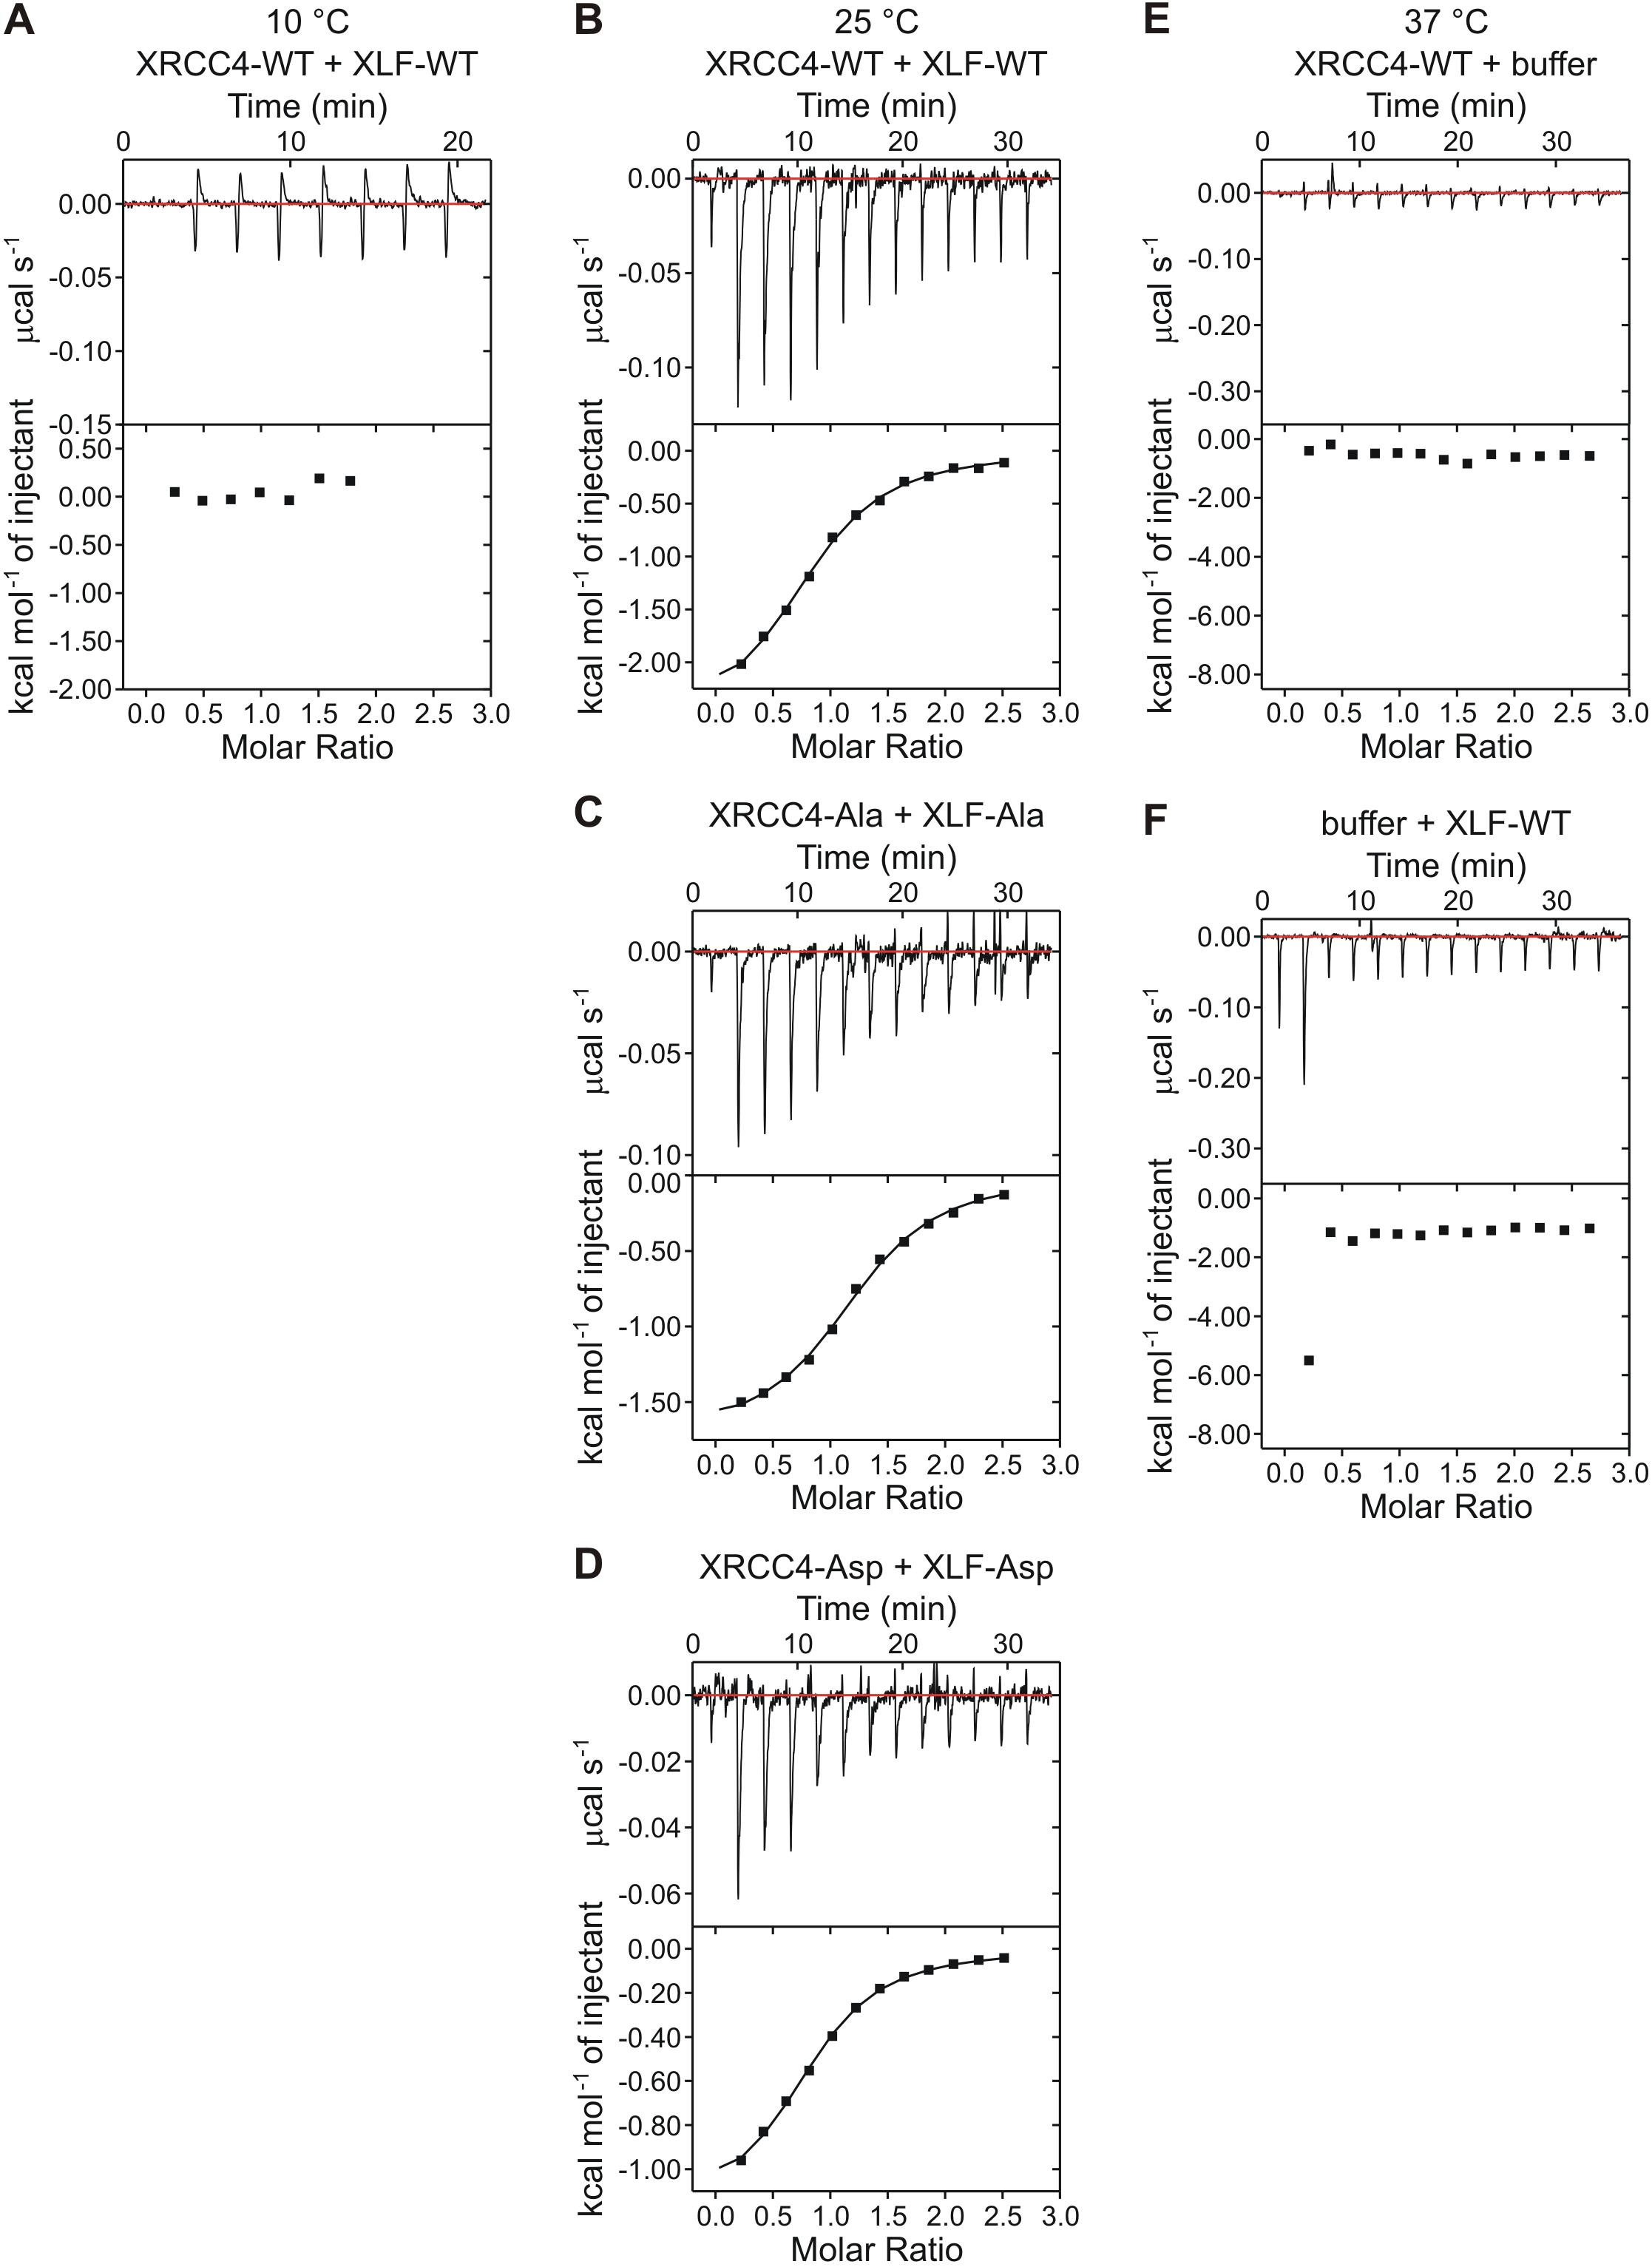

Supplement: supp [file elife-22900-supp-v1.zip › elife_poa_e22900_Figure_5_Supplement_1.tif]

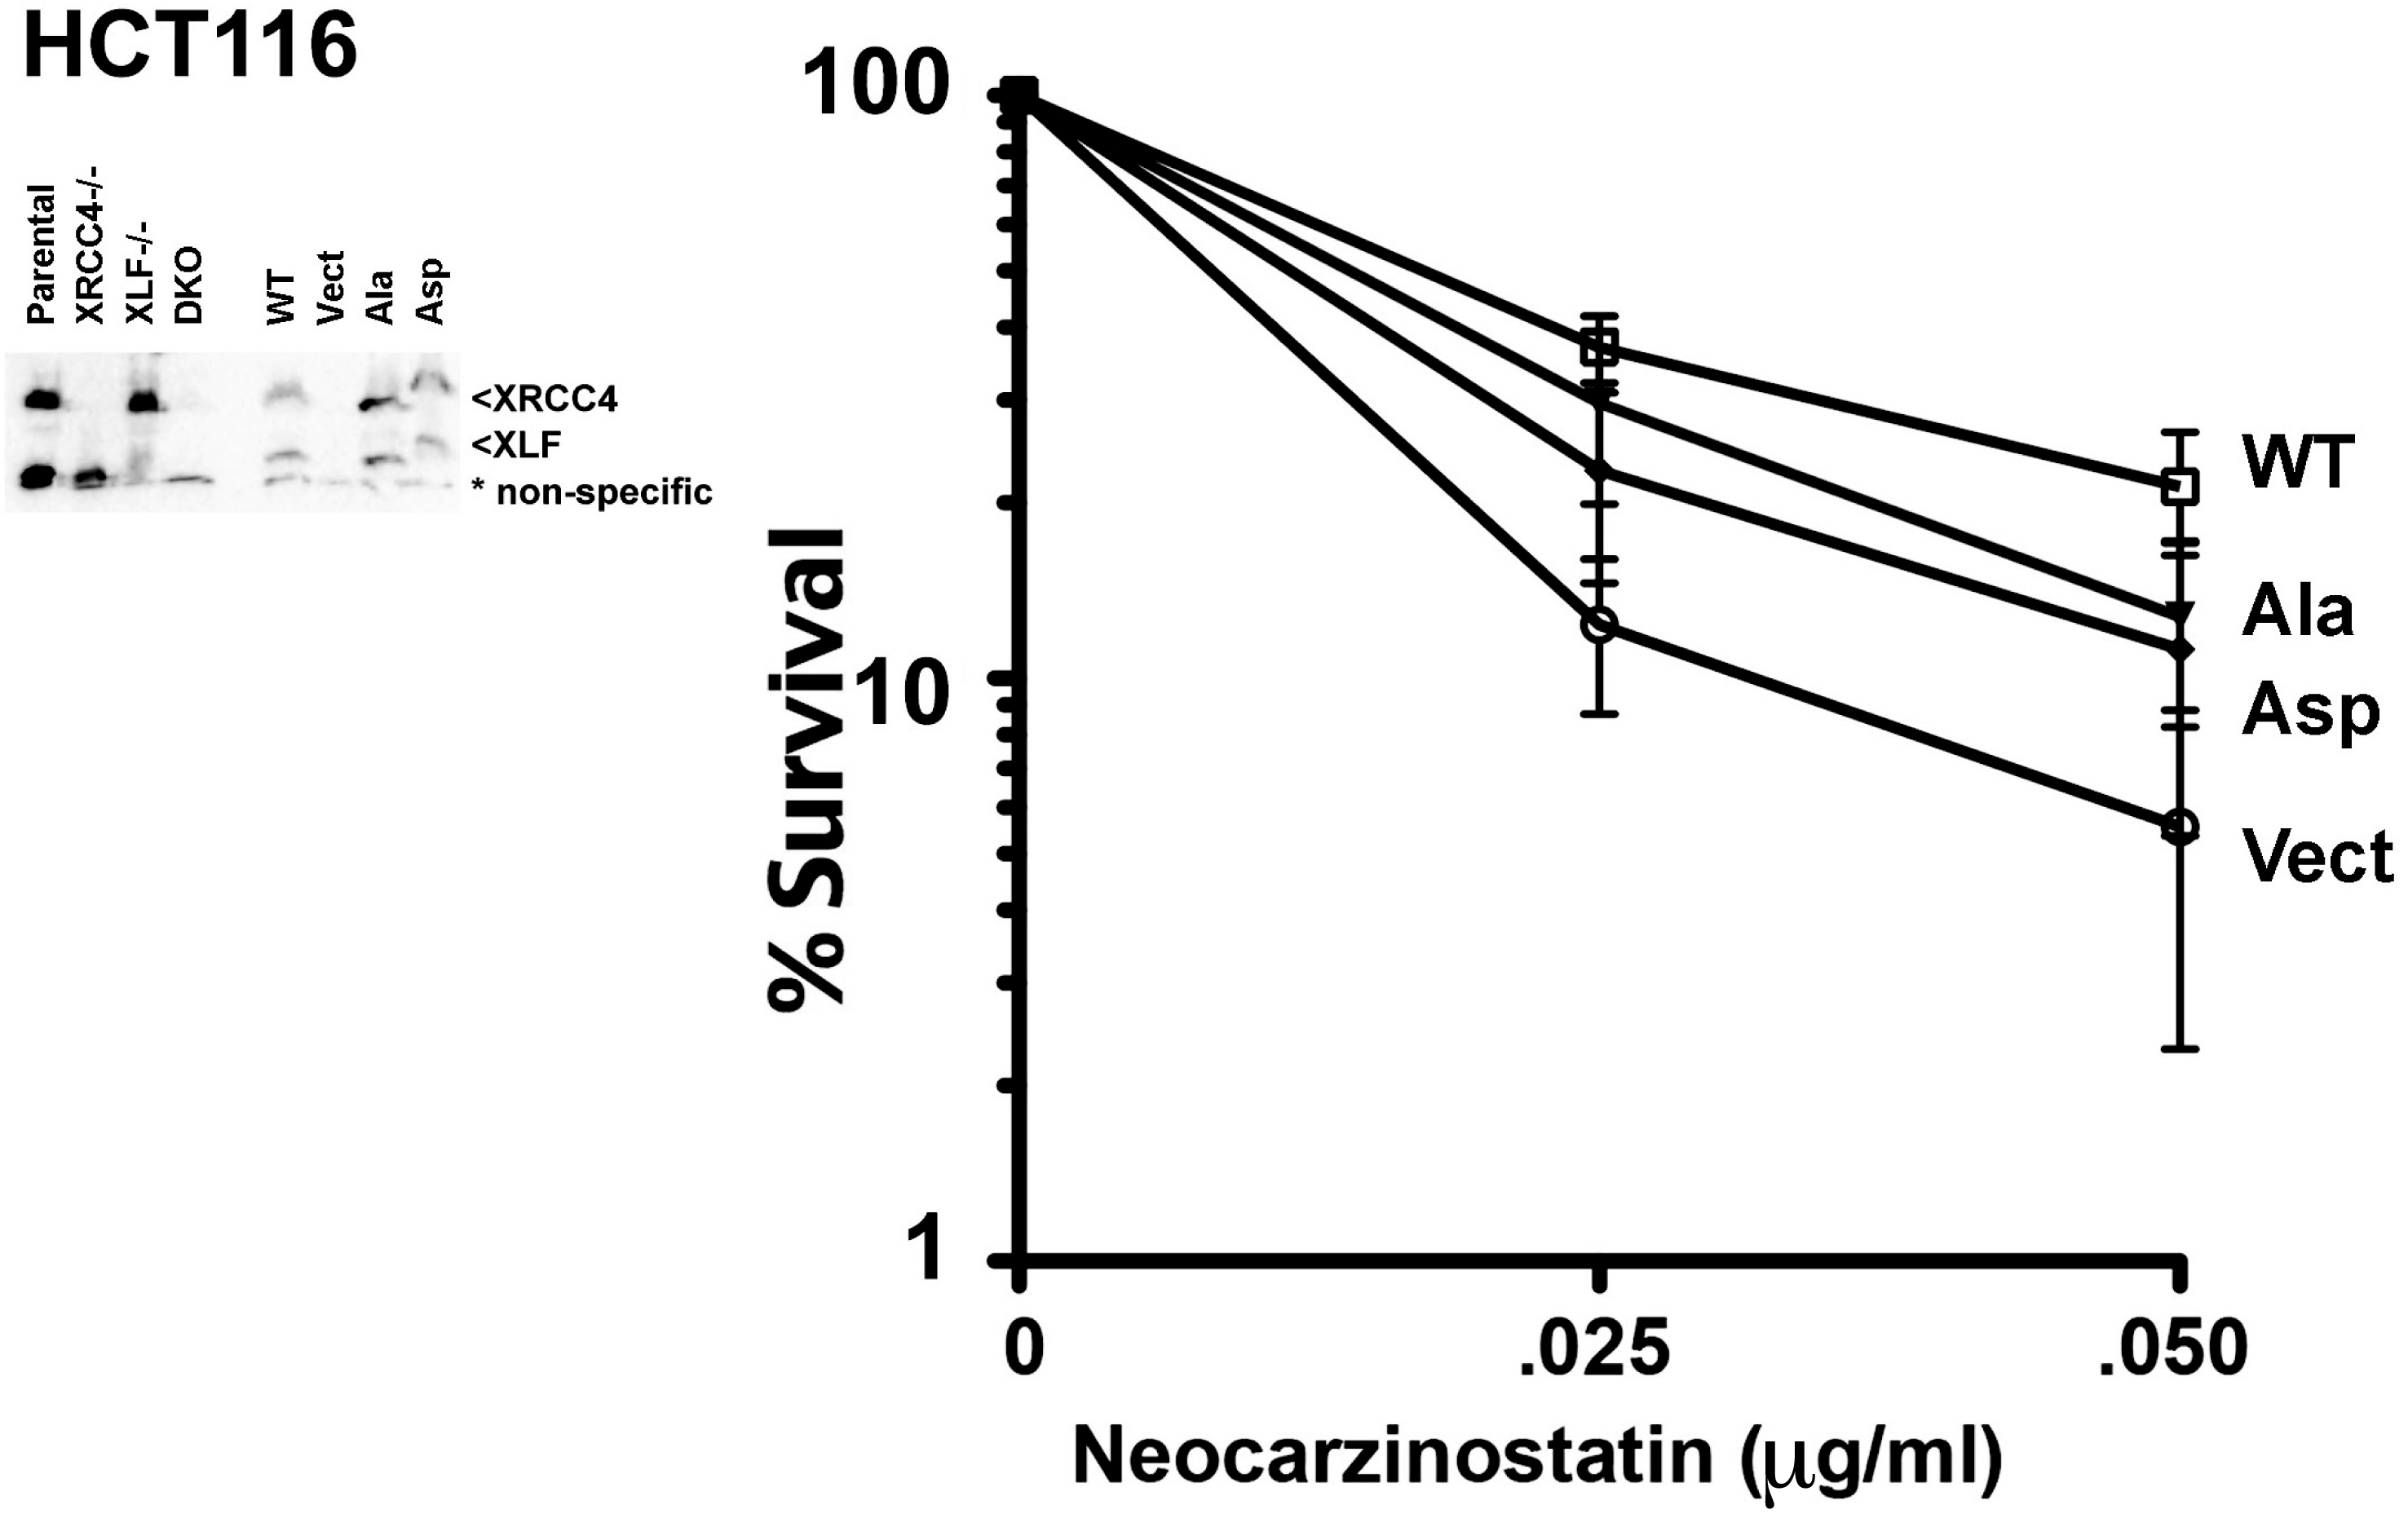

Supplement: supp [file elife-22900-supp-v1.zip › elife_poa_e22900_Figure12_figure_supplement_1.tif]

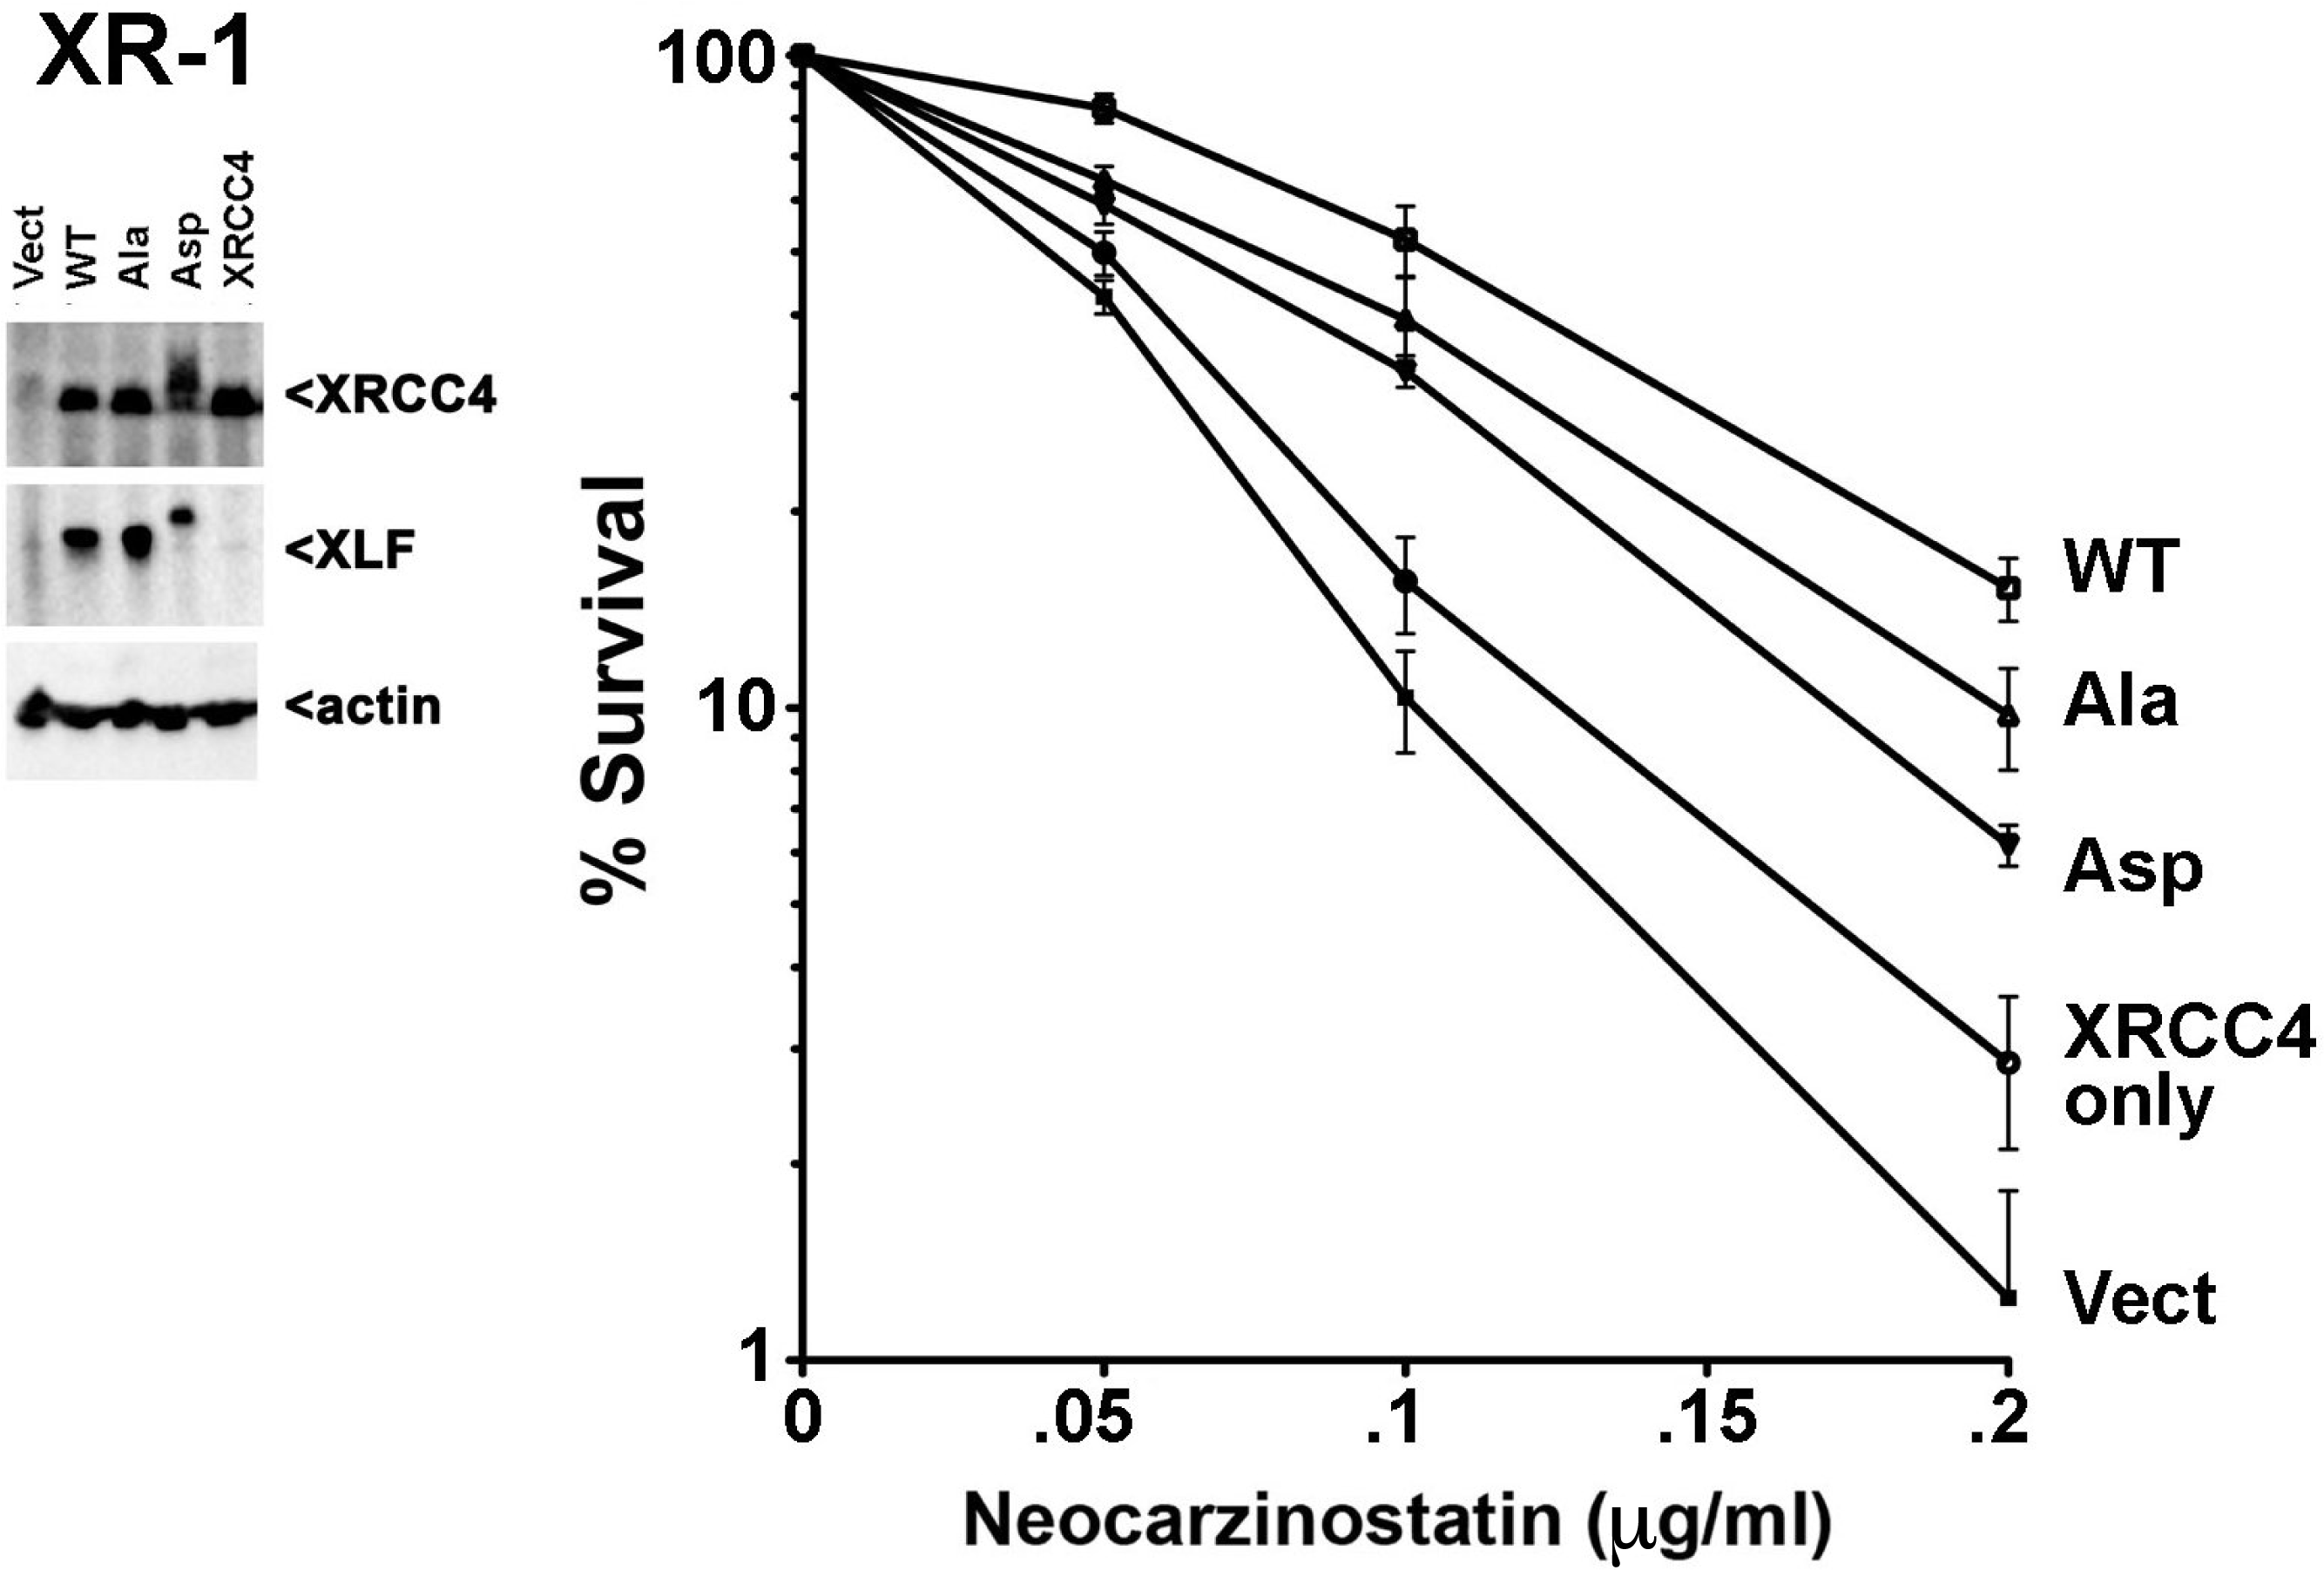

Supplement: supp [file elife-22900-supp-v1.zip › elife_poa_e22900_Figure_12_figure_supplement_2.tif]

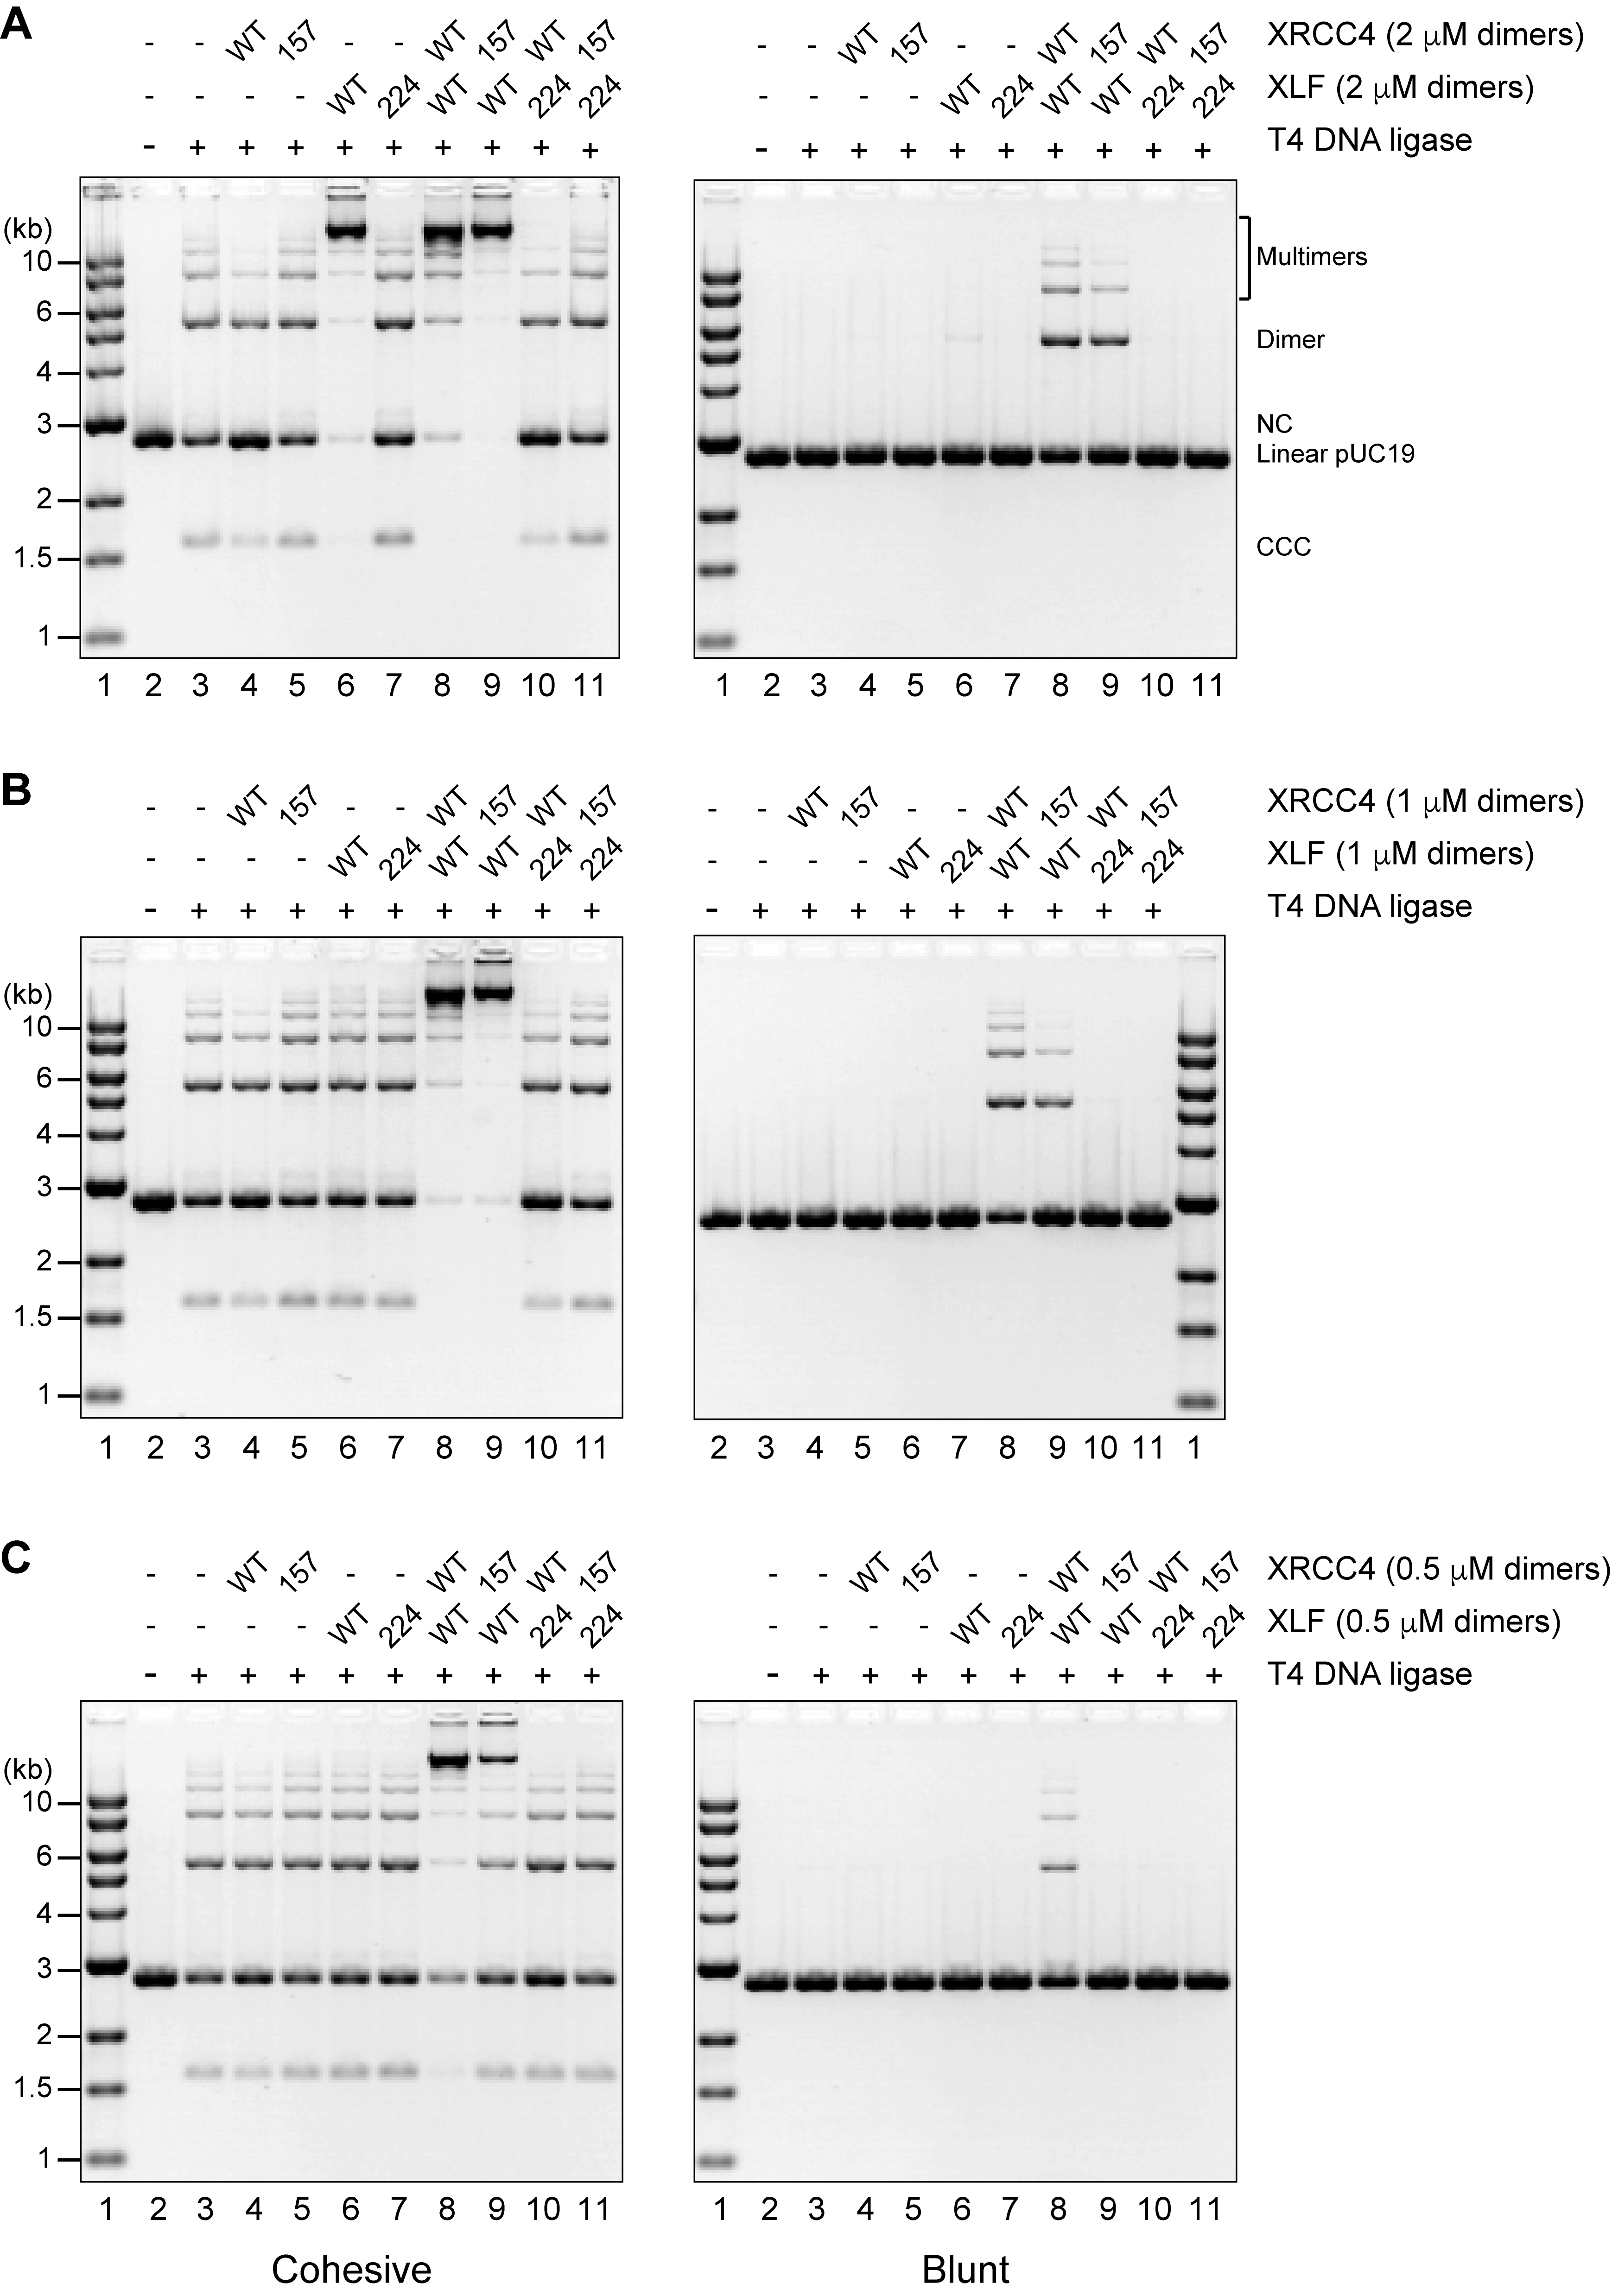

Supplement: supp [file elife-22900-supp-v1.zip › elife_poa_e22900_Figure_2_figure_supplement_1.tif]
